# Supplementary material
Source: Research Square preprint supplement (doi:10.21203/rs.3.rs-9408825/v1)
Supplement: Supplementary file 1 [file 102d45bc9378904813b31167.xlsx]

## Sheet: PAX7_teton_vs_cnt
Gene	baseMean	log2FoldChange	lfcSE	pvalue	padj
COL1A2	238.906	-0.417916	0.218667	0.00238757	0.331329
ACTC1	112.483	0.590839	0.179319	4.15446e-05	0.0208943
MYH3	133.369	0.0579674	0.106399	0.160306	0.999573
MTRNR2L10	84.0534	-0.0162295	0.0913587	0.571113	0.999573
ACTA1	33.7488	0.0293529	0.0965789	0.278435	0.999573
IGF2	71.1503	0.54647	0.170089	6.26724e-05	0.0269195
NFYA	228.119	0.0428065	0.0847939	0.371621	0.999573
COL1A1	71.1306	-1.17869	0.373495	7.59305e-05	0.0275092
COL3A1	54.1611	-0.980918	0.282603	2.62342e-05	0.016239
TPM2	28.3493	0.645784	0.202679	6.39985e-05	0.0269195
MYL9	21.6962	0.670019	0.224776	0.000122651	0.0379605
MYL1	17.9579	0.0938189	0.156488	0.0302848	0.978984
MYLPF	21.3856	0.428547	0.260221	0.00329216	0.394806
ALDOA	16.8815	0.0497583	0.102242	0.19543	0.999573
SPARC	29.1388	-0.0382458	0.0862856	0.398542	0.999573
TNNC2	13.9521	1.14643	0.271887	1.3181e-06	0.00209449
TTN	37.7348	0.203038	0.504217	0.0120961	0.771197
TUBA1C	33.3585	0.095556	0.148874	0.048462	0.999573
MEGF10	24.458	2.63206	0.357015	1.14013e-14	9.17467e-11
PRMT8	58.3725	0.00174856	0.0746994	0.970035	0.999988
TNNT1	22.5093	0.160775	0.253881	0.0225338	0.931873
VIM	28.6972	0.0551464	0.0999434	0.214023	0.999573
TNNT3	25.8621	0.709187	0.236732	0.000111678	0.0359468
TNNI2	17.4743	0.0467913	0.0982823	0.244025	0.999573
ACTN2	19.045	0.644999	0.315543	0.001314	0.234972
MYBPH	31.0751	0.401774	0.214133	0.00241158	0.331329
TPM1	13.7408	0.039022	0.0983952	0.250032	0.999573
LENG1	55.337	0.0131385	0.0795062	0.791564	0.999573
TET3	68.5527	0.10733	0.110385	0.077111	0.999573
THBS4	13.6992	0.606299	0.335407	0.00220242	0.330248
POSTN	22.3701	-0.882648	0.213226	1.6553e-06	0.00209449
TNNC1	13.8887	0.53922	0.257878	0.00150898	0.263973
PAGE5	15.5729	0.00432547	0.0876798	0.913425	0.999573
TMEM106C	72.9476	0.340427	0.128486	0.000527567	0.128646
SMIM17	18.0013	0.0402721	0.0948072	0.312648	0.999573
NHLH2	40.5688	0.0325508	0.0821585	0.482651	0.999573
DUX4	29.1917	0.339196	0.17074	0.00261675	0.35095
TPM3	11.9752	0.730027	0.259627	0.000261915	0.0702543
GNAS	15.4455	0.497458	0.314281	0.00333625	0.394806
MYL4	17.3933	0.912449	0.226379	3.07388e-06	0.00274839
APOBEC3A_B	52.187	0.0853708	0.105973	0.123611	0.999573
ZNF140	41.4543	0.00792458	0.0763166	0.862187	0.999573
SP7	69.6483	0.00784403	0.0868221	0.823528	0.999573
ATP2A2	16.8062	0.878599	0.276495	6.37214e-05	0.0269195
CKM	6.99571	0.0587265	0.116077	0.060646	0.999573
FN1	18.408	-0.853519	0.216035	3.88873e-06	0.00312926
CRYAB	7.28922	0.626469	0.519823	0.00494159	0.503354
IL32	11.8366	0.510485	0.292264	0.00290447	0.370988
DES	10.3459	0.0316252	0.0967843	0.279625	0.999573
FAM13B	36.928	0.110906	0.138591	0.0620574	0.999573
PEG10	9.49123	1.09352	0.292334	1.22043e-05	0.00818401
RPL37A	14.0347	0.0782229	0.136038	0.0385396	0.979175
MYL6B	17.2801	0.691617	0.21963	8.31786e-05	0.0278891
EEF1G	13.0834	0.31107	0.348168	0.0102828	0.71968
NEB	13.7442	0.0412539	0.098748	0.242741	0.999573
EIF3A	24.6112	0.0303973	0.0858717	0.48239	0.999573
LYRM2	51.0805	0.0542068	0.0870758	0.278121	0.999573
ADAM15	17.2899	0.970052	0.368707	0.000275658	0.0715555
PDE7A	36.599	0.0282433	0.0833182	0.528059	0.999573
MYH1	6.7016	0.0077578	0.0907789	0.7696	0.999573
COL5A2	12.794	-0.855334	0.215049	2.95575e-06	0.00274839
PDCD4	42.6854	0.0917696	0.107823	0.108314	0.999573
MYH8	8.98225	1.47476	0.350251	1.82198e-06	0.00209449
NES	14.7711	0.0527289	0.105249	0.167561	0.999573
FSTL1	11.6747	0.00963896	0.0882892	0.767559	0.999573
RPL41	14.3278	0.40561	0.338753	0.00637782	0.561818
SIGIRR	14.9349	0.00672763	0.0855811	0.855232	0.999573
IL24	40.4038	0.0588863	0.0939269	0.232687	0.999573
RPS3A	14.4881	0.0160253	0.0888153	0.638028	0.999573
MYOG	17.3822	0.120346	0.198418	0.0255886	0.931873
EIF4G2	12.6066	0.0467257	0.100135	0.225307	0.999573
ACTA2	9.86707	0.00536635	0.0890262	0.859963	0.999573
HNRNPA2B1	20.9103	0.0765625	0.111375	0.133255	0.999573
DCN	13.8452	0.536745	0.303383	0.00242928	0.331329
ENO3	12.4472	0.118052	0.23236	0.00867489	0.658612
NCK1	8.6937	0.149816	0.329633	0.0132538	0.785858
DLK1	8.61994	0.903333	0.295913	0.000134744	0.0401587
MB	3.35151	0.0269557	0.0981215	0.154998	0.999573
RTN4	12.2374	0.0602432	0.107951	0.154028	0.999573
RPL7A	14.4701	0.0919764	0.14829	0.0441844	0.999573
HSP90AB1	10.2858	0.136377	0.220897	0.0276548	0.962502
HNRNPA1	18.1248	0.0865055	0.138776	0.0558171	0.999573
COL6A2	11.3281	0.0502693	0.107314	0.122203	0.999573
IGFBP5	13.3787	-0.0424706	0.0994256	0.231714	0.999573
ZNF106	11.8063	0.0370626	0.0962594	0.293076	0.999573
ETV3	27.0508	0.117547	0.146043	0.0585316	0.999573
FLNC	9.79893	0.0814115	0.13434	0.056088	0.999573
GOLGA8A	24.331	0.111341	0.168892	0.0395487	0.979175
RPL32	11.1692	0.0543408	0.10643	0.157333	0.999573
PTBP1	18.9883	0.0466749	0.0981473	0.249906	0.999573
GPC1	14.5822	0.701478	0.217493	7.02939e-05	0.026936
STBD1	25.3645	0.0363263	0.0895993	0.392193	0.999573
CKB	12.9467	0.60526	0.260674	0.000870376	0.170827
PDE4DIP	13.1351	0.0551186	0.109697	0.116741	0.999573
DDX17	30.3724	0.00432392	0.0787002	0.951463	0.999573
TPI1	9.14475	0.0232116	0.0916103	0.475278	0.999573
MYH7	4.86504	-0.00653141	0.0921127	0.761559	0.999573
DYNC1H1	20.2923	0.0588519	0.101533	0.195084	0.999573
RPS12	10.2514	0.0685266	0.122135	0.0704274	0.999573
SRL	9.78023	0.0944578	0.15674	0.0336901	0.979175
RPL34	10.9903	0.0366129	0.0983254	0.247521	0.999573
PLEC	15.1761	0.0306094	0.0912249	0.417485	0.999573
MEPCE	32.393	0.0280947	0.0820656	0.535317	0.999573
BIN1	7.91728	0.0549778	0.11121	0.0996117	0.999573
NACA	17.8359	0.155515	0.269485	0.0202	0.913199
TUSC2	32.2572	-0.0202763	0.0805362	0.645571	0.999573
RPS17	9.82175	0.0418906	0.101124	0.196264	0.999573
TMEM30A	19.8311	0.0447361	0.0928237	0.310939	0.999573
FTH1	8.40776	0.00903579	0.0894426	0.758544	0.999573
COL6A1	17.9511	-0.102532	0.163273	0.0430519	0.999573
RPL17	12.3416	0.0522896	0.110545	0.0845639	0.999573
RPL6	9.13764	0.0343099	0.0955081	0.316152	0.999573
JPH4	19.2113	0.385627	0.216187	0.00325296	0.394806
TNFAIP8	10.8663	-0.0178345	0.0909866	0.557474	0.999573
COL5A1	15.6571	-0.424944	0.324774	0.00522262	0.509953
TMSB10	12.0797	0.00841013	0.0877763	0.803273	0.999573
CD63	10.2115	0.0448767	0.101069	0.208428	0.999573
FHL1	6.02502	-0.002088	0.0904909	0.934443	0.999573
CDKN1A	8.40939	0.758368	0.328237	0.000908125	0.173992
TNC	19.783	0.0701659	0.127833	0.0403984	0.979175
CCDC47	26.8038	0.0246213	0.0850742	0.560472	0.999573
RPL7	8.34647	0.54743	0.674443	0.00618971	0.561818
RPL4	7.65459	0.0381066	0.098898	0.232518	0.999573
AAMP	26.818	-0.0186165	0.0822591	0.661417	0.999573
UBE2Z	27.599	0.00632179	0.0809613	0.880213	0.999573
RPS23	8.30076	0.0925122	0.159715	0.0231753	0.931873
RPS24	8.7969	0.0492069	0.107246	0.117843	0.999573
SLN	4.51496	0.0595711	0.118677	0.0390173	0.979175
ANKRD36B	25.4644	0.183457	0.241623	0.021369	0.931866
RPS28	8.7197	0.0454775	0.104964	0.132823	0.999573
MARCKS	12.1311	0.0355927	0.0956045	0.309683	0.999573
HSPA8	8.90096	0.0385557	0.0977941	0.264299	0.999573
TESC	10.1054	0.00294902	0.0894181	0.919724	0.999573
TUBB6	10.4247	0.548671	0.326583	0.00305855	0.384565
RAD23B	19.9519	0.00276207	0.0841699	0.94323	0.999573
AK1	4.96859	0.0406588	0.102893	0.135153	0.999573
RPS8	8.73084	0.083658	0.146883	0.0223777	0.931873
MAGEA3	23.2849	0.0884172	0.123732	0.0929774	0.999573
MYBPC1	6.58964	0.0268501	0.0948076	0.355387	0.999573
RPL5	10.1458	0.0704052	0.121584	0.0824981	0.999573
MAZ	20.1355	-0.0327681	0.0878339	0.437037	0.999573
ITM2B	8.79993	0.0187312	0.0915581	0.527351	0.999573
RPL9	8.75466	0.0414701	0.101591	0.180621	0.999573
RPL29	9.01127	0.445054	0.402673	0.00665382	0.563614
BASP1	21.1995	0.078002	0.113531	0.123792	0.999573
RPL35	7.70893	0.0664461	0.121325	0.0658826	0.999573
SERBP1	7.93325	0.0391193	0.100155	0.207515	0.999573
PCBP1	7.49649	0.0119691	0.0893969	0.702078	0.999573
JPT1	8.06192	0.032922	0.0949201	0.338522	0.999573
PKM	9.12668	-0.0071246	0.0876243	0.829793	0.999573
CASQ2	9.32749	0.049777	0.108553	0.0966781	0.999573
FUS	13.6409	0.0668774	0.113613	0.123319	0.999573
PFN1	9.46536	0.0442069	0.104753	0.125288	0.999573
RPS4X	7.47029	0.5001	0.421798	0.00642317	0.561818
ZNF506	22.9316	0.0266295	0.0863258	0.523186	0.999573
QKI	13.0261	0.0763546	0.123615	0.0880622	0.999573
MAGED2	9.50906	0.0942063	0.150343	0.0452716	0.999573
PDLIM3	5.98682	0.00763455	0.0907835	0.772032	0.999573
CA3	2.04347	0.00162431	0.0926859	0.928068	0.999573
NFE2L1	8.70246	0.0614112	0.114411	0.098979	0.999573
HSPB1	4.96967	0.0281292	0.0970857	0.248144	0.999573
RPS6	9.72451	0.0681918	0.119528	0.0884586	0.999573
TTYH3	19.1763	-0.0240978	0.0850773	0.563433	0.999573
PRELID3B	24.443	-0.0117743	0.0807079	0.779738	0.999573
TMSB4X	11.2991	0.0394691	0.100598	0.194308	0.999573
TASOR2	24.9257	-0.00411879	0.0795609	0.934264	0.999573
RPL38	6.52495	0.00218089	0.091114	0.928782	0.999573
SPTAN1	14.667	0.0777241	0.125393	0.0842182	0.999573
PDLIM7	20.9616	-0.0383417	0.0909166	0.35976	0.999573
RPSA	8.02466	0.0536405	0.108936	0.12002	0.999573
RPL37	7.29765	0.0781284	0.135996	0.0394161	0.979175
FABP1	26.9581	0.0949947	0.129651	0.080469	0.999573
DUX5	19.1906	0.0539624	0.0986231	0.227824	0.999573
LDB3	8.43535	0.0723048	0.13207	0.0284672	0.962502
STAC3	9.03084	0.0545318	0.108933	0.123988	0.999573
SPTBN1	8.79877	0.0358741	0.0976823	0.263304	0.999573
ACTN3	5.3253	0.0263195	0.0953715	0.332523	0.999573
RPL19	7.98486	0.0853588	0.144601	0.037353	0.979175
AHNAK	8.58384	0.090029	0.155167	0.0242912	0.931873
RUVBL2	19.8437	0.130182	0.170187	0.0429079	0.999573
ACSF2	12.3938	-0.0293758	0.0905569	0.437529	0.999573
AK8	7.87496	0.00715257	0.0909751	0.778666	0.999573
ATP5F1B	5.82274	0.0924464	0.160757	0.022135	0.931873
PCBP2	9.62133	0.549896	0.306791	0.00276264	0.364442
RPL21	8.74032	0.750231	0.344976	0.00121497	0.222202
CHRNA1	13.4085	0.0526922	0.107851	0.129869	0.999573
LRRN1	12.785	0.027808	0.0938077	0.38281	0.999573
IFITM2	20.1619	0.0214587	0.0860255	0.590996	0.999573
RPL27A	7.64819	0.0233206	0.0933862	0.423607	0.999573
LMNA	7.83889	0.0495023	0.105255	0.154348	0.999573
RPL18	6.98816	0.0924762	0.161751	0.0191827	0.893759
SERPINF1	5.87916	-0.00266936	0.0899082	0.922258	0.999573
MAGED1	7.87653	-0.0169171	0.0898805	0.599642	0.999573
IGFBP4	6.46863	-0.00314567	0.0898543	0.908244	0.999573
C12orf57	12.3842	0.0080875	0.0855311	0.828889	0.999573
STMN1	6.649	0.0840628	0.144274	0.0333921	0.979175
RPS18	7.72152	0.0203743	0.0920266	0.494173	0.999573
APP	7.42066	-0.0280326	0.0945975	0.353007	0.999573
RPL15	6.70774	0.0449853	0.104834	0.128995	0.999573
CSDE1	5.07699	0.0156415	0.0921515	0.558405	0.999573
MACF1	12.6896	0.101834	0.157643	0.0442631	0.999573
RTL8C	8.33521	-0.000818938	0.0872908	0.999948	0.999988
ANXA6	8.50245	0.0557904	0.109248	0.128138	0.999573
PALLD	7.27794	-0.0247513	0.0928844	0.427625	0.999573
RPL13	9.20804	0.0521493	0.105953	0.156835	0.999573
RPL26	8.09221	0.0440396	0.102222	0.182598	0.999573
ZNF723	23.4388	0.0381124	0.0876215	0.395735	0.999573
H4C1	15.9064	0.0998662	0.148115	0.0565633	0.999573
HSPB8	4.31791	0.0447654	0.108549	0.0256027	0.931873
RPS15	6.36987	0.0584492	0.114483	0.0811332	0.999573
CNN3	8.38188	0.03752	0.0966494	0.287596	0.999573
MYH9	8.63348	-0.0593291	0.111875	0.109613	0.999573
CAPNS1	4.90305	0.046577	0.106062	0.117517	0.999573
COL6A3	9.86025	-0.0319742	0.09602	0.307063	0.999573
PHAX	24.6393	0.00803526	0.082265	0.84565	0.999573
LDHB	6.04389	-0.00411518	0.0896027	0.886226	0.999573
CACNA2D1	8.04844	0.226667	1.04487	0.0119029	0.771197
CCDC88B	20.7008	0.0356755	0.0893649	0.398442	0.999573
KIF1B	8.28828	0.0643435	0.117703	0.0845316	0.999573
HNRNPU	8.04715	0.495282	0.396157	0.00557772	0.528046
TMA7	12.6027	0.145452	0.21448	0.0305892	0.978984
GAL3ST2	10.1793	0.0726663	0.126643	0.0606876	0.999573
RACK1	7.65052	0.0227864	0.0932647	0.431419	0.999573
PTMA	10.5617	0.0575612	0.112544	0.0971417	0.999573
ITPRID2	14.3849	0.0100052	0.0852021	0.793333	0.999573
EIF3C	8.55242	0.0662026	0.121992	0.0591687	0.999573
SIGMAR1	15.2664	0.0400729	0.0940081	0.322451	0.999573
RPS11	6.90286	0.0613913	0.12037	0.0368393	0.979175
SRSF5	17.7192	0.0436473	0.0953733	0.291288	0.999573
NAP1L1	8.40635	0.027923	0.0933514	0.393214	0.999573
MZT2B	7.48233	0.0531035	0.108467	0.124585	0.999573
RPS14	7.49195	0.0249599	0.0938087	0.399922	0.999573
ATP2A1	4.88362	-0.00246378	0.0910762	0.917538	0.999573
CANX	7.15057	-0.0605124	0.114436	0.0930668	0.999573
RPS3	8.77515	0.541416	0.462297	0.00525986	0.509953
RCN1	7.87542	0.00976338	0.0893368	0.751092	0.999573
INPPL1	11.2544	-0.0775358	0.125527	0.0793741	0.999573
RPL10A	10.285	0.0395014	0.0996251	0.223066	0.999573
HNRNPA3	9.25339	0.0886356	0.141225	0.0554153	0.999573
RPS20	7.10436	0.0290782	0.0955327	0.326895	0.999573
CFL1	6.467	0.0562409	0.113688	0.0731861	0.999573
MAPKBP1	18.672	-0.0410633	0.091349	0.340005	0.999573
RPS27A	6.37834	0.821353	0.410481	0.00169691	0.290532
SFRP4	8.96242	-0.305954	0.346259	0.00875748	0.658612
MYL6	8.9805	0.0815159	0.138081	0.0442766	0.999573
B2M	5.3524	-0.0165314	0.0918585	0.549143	0.999573
R3HDM4	11.3589	0.0224434	0.0901812	0.520804	0.999573
FAM3C	15.7491	0.0337843	0.0916984	0.387473	0.999573
MORF4L1	7.04963	0.0138861	0.0899378	0.654692	0.999573
RPL30	7.53811	0.0921017	0.15919	0.0221718	0.931873
EEF1D	6.88369	0.12967	0.25166	0.0162847	0.848735
NPNT	8.77653	-0.113169	0.194104	0.0209262	0.925238
SETD7	5.48477	0.0513127	0.11033	0.0802918	0.999573
MYADM	9.03569	0.51684	0.428069	0.00573504	0.536626
CCDC8	11.3336	0.0727443	0.120715	0.0933858	0.999573
MEST	7.10761	-0.0557902	0.112688	0.0812131	0.999573
DMPK	8.24868	0.034563	0.0973077	0.269865	0.999573
TMEM50B	21.3326	0.174943	0.205556	0.0256782	0.931873
PPIA	8.19261	0.0582558	0.115105	0.0689446	0.999573
RPS2	6.31001	0.0436005	0.104182	0.133292	0.999573
HRC	7.13825	0.0267089	0.0937656	0.390034	0.999573
BIRC5	19.3529	0.291436	0.233826	0.0090559	0.674748
TMEM213	15.5085	0.0176743	0.0889506	0.610339	0.999573
ZNF587	21.6436	-0.014578	0.0854189	0.705314	0.999573
SRRM2	12.6139	-0.00954124	0.0866118	0.783337	0.999573
PRKACA	4.10351	0.0431243	0.104959	0.104933	0.999573
MARCKSL1	8.69889	0.029769	0.0956897	0.317439	0.999573
OGN	7.26349	-0.0389476	0.100172	0.203086	0.999573
RPL8	6.02281	0.0496363	0.108658	0.0924218	0.999573
TNNT2	14.779	0.846376	0.287862	0.000154768	0.0444792
RPRD1B	17.3643	0.200241	0.252149	0.0197922	0.904932
THEM5	17.7559	0.0681748	0.10983	0.143672	0.999573
KRT28	16.6462	0.0335115	0.0927709	0.37511	0.999573
RPL31	6.29693	0.0351155	0.100279	0.165617	0.999573
TCAP	2.84113	-0.0345864	0.100811	0.131271	0.999573
MEF2C	4.63075	0.00245514	0.0908998	0.922456	0.999573
EIF4G1	6.42018	0.0680896	0.122687	0.0643396	0.999573
DVL1	12.9344	0.034427	0.0926322	0.368352	0.999573
ARF1	6.39369	0.0317381	0.0964975	0.287413	0.999573
MUSTN1	4.7289	0.0839612	0.15356	0.00806603	0.637394
PPP1R14B	7.22923	0.00634388	0.0890805	0.834934	0.999573
RPL28	5.9207	0.0123992	0.0908966	0.658217	0.999573
EIF4A1	6.5349	0.0633695	0.118709	0.0709492	0.999573
ITM2A	5.18084	0.036665	0.0999587	0.195525	0.999573
SYNPO2L	5.59768	-0.0026837	0.0898426	0.921533	0.999573
SELENOW	5.88159	0.098042	0.176279	0.0136053	0.793348
YWHAZ	6.34828	0.0401683	0.100813	0.19671	0.999573
C4orf46	19.2754	0.0276245	0.0863051	0.509313	0.999573
RPS5	6.07872	0.0278341	0.0960791	0.301316	0.999573
DDX5	14.2575	0.0520218	0.102273	0.198995	0.999573
STK25	7.67434	0.0108303	0.0893109	0.729105	0.999573
ELK1	14.8687	-0.0315791	0.0902743	0.420279	0.999573
NPM1	8.61841	0.0821282	0.137919	0.0468946	0.999573
NFIX	4.47813	-0.010404	0.0915912	0.676425	0.999573
OLFML3	10.863	0.0190552	0.0889475	0.582004	0.999573
POLR2E	11.7946	0.0267344	0.0901605	0.471238	0.999573
MYOT	7.49616	0.608982	0.36323	0.00327224	0.394806
ATP5F1A	5.65672	0.0492605	0.108039	0.101228	0.999573
TLE5	5.98801	0.0205139	0.0931684	0.450813	0.999573
HDLBP	5.85284	-0.00894254	0.090184	0.749674	0.999573
LGALS1	6.09325	-0.00937832	0.0910729	0.718853	0.999573
S100A6	4.76521	0.0144361	0.092846	0.539006	0.999573
UBA52	4.0856	0.0465016	0.107661	0.0769535	0.999573
RDH13	9.90148	-0.0226856	0.090917	0.498933	0.999573
TOMM34	14.3199	-0.00263813	0.0883972	0.931504	0.999573
OBSL1	12.1012	0.181992	0.553824	0.0114931	0.76434
FNDC5	13.4238	0.0151119	0.0890522	0.650137	0.999573
ARRDC1	13.5982	0.00562358	0.0845787	0.887226	0.999573
MYL12A	3.90291	0.0115417	0.0922578	0.624624	0.999573
ITGB1	6.98161	-0.0275332	0.0937407	0.382606	0.999573
NBPF15	14.5444	0.00710308	0.0853253	0.847229	0.999573
CIRBP	10.1579	0.0364573	0.0956399	0.305874	0.999573
CFDP1	11.0365	-0.0206389	0.0886897	0.571037	0.999573
DBN1	8.0274	0.0456946	0.102035	0.1946	0.999573
MAP4	10.5109	0.038268	0.0972443	0.273591	0.999573
CLTB	9.45104	0.19141	0.403449	0.0165154	0.85148
TRIM17	11.0334	0.0140615	0.0875842	0.680406	0.999573
MEGF8	14.4355	0.0222815	0.088957	0.542386	0.999573
EGR1	5.70963	-0.00247246	0.0897924	0.928013	0.999573
TUBB4B	7.5865	0.0321847	0.0954275	0.325656	0.999573
MRFAP1	4.66069	0.0569684	0.114949	0.0622457	0.999573
EBI3	6.05562	-0.0340584	0.0972876	0.263196	0.999573
NREP	6.56544	0.0152067	0.0914661	0.589449	0.999573
CFL2	4.82351	0.031654	0.097735	0.24637	0.999573
HSPG2	8.01298	0.0115047	0.0897151	0.706073	0.999573
HNRNPCL3	17.8838	0.0324604	0.0918581	0.396478	0.999573
UNC45B	7.27997	0.00625352	0.0896952	0.828334	0.999573
ERF	11.9334	0.0262361	0.0905157	0.471778	0.999573
NCL	6.63334	0.0517246	0.109001	0.108898	0.999573
NBPF12	10.9254	0.0146102	0.0880695	0.674943	0.999573
RNF181	6.30801	0.0131715	0.0904807	0.654224	0.999573
EIF5A	4.87906	0.00385637	0.0903794	0.886596	0.999573
PTP4A3	14.4349	0.0163602	0.087568	0.652104	0.999573
DCX	5.31773	0.0368314	0.0999597	0.197577	0.999573
MYOM1	5.29633	0.0571707	0.114073	0.0763745	0.999573
CHD4	7.72137	0.0352737	0.0965401	0.291214	0.999573
KREMEN2	13.9373	0.0179333	0.0911119	0.554665	0.999573
PLD3	5.51658	0.0191798	0.0920407	0.51245	0.999573
PHC2	9.6154	0.00521371	0.0874721	0.876611	0.999573
CTNNB1	7.08449	7.675e-05	0.0885535	0.998924	0.999988
SRSF1	11.4376	0.105866	0.161365	0.0451106	0.999573
MYOM3	5.53537	0.0189258	0.0926925	0.488605	0.999573
P4HB	6.89957	-0.0156166	0.0903845	0.60912	0.999573
SVIL	7.02614	0.0589615	0.113623	0.0915346	0.999573
NME2	5.68204	0.0173036	0.0924621	0.519213	0.999573
CALR	5.93931	0.00392945	0.0898381	0.889241	0.999573
CALU	5.31689	0.0444103	0.104255	0.137559	0.999573
PTMS	9.3105	-0.0104324	0.0912601	0.689503	0.999573
MMP14	7.78641	-1.14888	0.264206	5.06022e-07	0.00101799
CHPF	5.40464	0.0102847	0.090419	0.717874	0.999573
STIP1	5.65943	0.0437761	0.103384	0.153916	0.999573
LDHA	3.71414	0.0587408	0.118525	0.0338292	0.979175
ENAH	6.53293	0.121375	0.234969	0.0123721	0.771197
SLC25A3	4.56832	0.000138992	0.0901267	0.996715	0.999988
GYS1	6.70082	0.0460624	0.104216	0.154261	0.999573
CCNI	5.58871	-0.00247392	0.0903395	0.923979	0.999573
LENG8	16.5499	0.0222546	0.0853489	0.586231	0.999573
CHRND	5.60736	-0.0240608	0.0939215	0.395049	0.999573
RPL27	7.42856	-0.0276462	0.0931292	0.397194	0.999573
SMYD1	4.04585	0.0244519	0.0953927	0.330781	0.999573
HSPA5	6.7406	0.00715514	0.0902162	0.79659	0.999573
PFKM	4.06966	0.0169304	0.093239	0.483102	0.999573
RPL26L1	4.76834	-0.00239344	0.0907674	0.922965	0.999573
HMGB1	7.65589	0.0292426	0.0948701	0.330587	0.999573
RASL10A	4.54559	-0.0303315	0.0973028	0.248991	0.999573
RPS13	5.28915	0.0406998	0.102314	0.15809	0.999573
SEPTIN7	4.90536	0.0537067	0.111525	0.0835454	0.999573
SKI	6.1772	0.00761663	0.0896933	0.778942	0.999573
MYL3	2.09257	0.00472685	0.0926619	0.799906	0.999573
TUBB2A	4.65152	0.00405041	0.090353	0.880236	0.999573
BTBD6	13.6044	0.028573	0.089903	0.455912	0.999573
UQCRC2	5.89153	0.0471367	0.106678	0.105817	0.999573
BTF3	5.18064	0.00217556	0.0913934	0.925456	0.999573
RPS27	5.68471	0.071797	0.129297	0.0412928	0.985375
CCND2	8.67706	0.00781461	0.0901793	0.782562	0.999573
FIZ1	14.2279	-0.0154452	0.0857508	0.685669	0.999573
RPL22	5.29314	0.00613809	0.0906655	0.815525	0.999573
CDC37	7.81835	0.0296771	0.0937138	0.37879	0.999573
RNF167	11.6125	-0.0175406	0.0881315	0.621603	0.999573
MAP4K4	6.37474	-0.00624671	0.0893343	0.832948	0.999573
HSPA9	4.43031	0.0142981	0.091812	0.592292	0.999573
EPC1	10.9829	0.0517241	0.10467	0.172516	0.999573
CLSTN2	5.87638	-0.027641	0.0952354	0.335903	0.999573
RPL24	7.17769	0.0962555	0.167506	0.0179356	0.872776
ATP1A1	6.03798	0.0344975	0.0988433	0.221897	0.999573
TRIO	8.32758	0.0551433	0.114537	0.0488247	0.999573
RPL18A	4.68521	-0.00102004	0.0907869	0.966822	0.999988
BLCAP	10.664	-0.0818792	0.146351	0.0177112	0.872776
PYGM	3.52225	0.0213667	0.0955342	0.301375	0.999573
ZNF391	8.10439	0.060094	0.113022	0.107784	0.999573
GABARAP	3.44402	0.0014366	0.0911908	0.95286	0.999573
NPIPA1	14.4113	-0.0586061	0.105828	0.164987	0.999573
ITM2C	6.5149	-0.0389531	0.100733	0.1892	0.999573
PRRC2B	9.07547	0.0295362	0.0925697	0.405449	0.999573
DDB1	5.21255	0.00941459	0.0906519	0.734138	0.999573
RPS19	4.48408	0.0870461	0.155018	0.0147695	0.827032
RAPSN	9.88526	0.108727	0.177888	0.030429	0.978984
HNRNPDL	11.4887	0.0291543	0.091087	0.433038	0.999573
FAM171A2	6.60343	0.0589537	0.114307	0.0881018	0.999573
FKBP9	4.91666	-0.00817968	0.0914094	0.738472	0.999573
YBX1	3.65834	0.0207514	0.094495	0.385397	0.999573
NUCKS1	6.37662	0.0333237	0.0963732	0.297931	0.999573
DYNLL2	4.40102	0.0186417	0.093103	0.473802	0.999573
HNRNPL	9.18306	0.0737979	0.127872	0.0804968	0.999573
HNRNPC	5.9383	0.0291191	0.0956418	0.322603	0.999573
ATP5MC2	5.89323	-0.0139333	0.0913406	0.610951	0.999573
PRKAR1A	4.83434	-0.0239553	0.0941304	0.388839	0.999573
PTP4A2	4.04516	-0.00434463	0.0909827	0.860079	0.999573
ATF4	7.87602	-0.00596955	0.0884211	0.849386	0.999573
ZNF383	10.9192	-0.000854679	0.0860472	0.979905	0.999988
MYOZ1	2.82537	-0.0108296	0.0933443	0.561614	0.999573
NPIPB6	17.4978	0.0213483	0.0860004	0.593028	0.999573
CTNNA1	5.75964	0.0829932	0.143915	0.0314476	0.978984
TCEAL7	4.51713	0.0055216	0.0911107	0.813856	0.999573
KPNB1	4.99571	0.0473883	0.106683	0.111242	0.999573
KLHL41	4.08812	0.0766118	0.139326	0.019023	0.893759
VCP	4.74206	0.0307315	0.0978318	0.230019	0.999573
CYCS	4.62705	0.0576953	0.115947	0.055117	0.999573
TRAK1	4.95621	-0.0139502	0.0915667	0.603009	0.999573
PPP1CB	4.57033	-0.0129095	0.0914312	0.629061	0.999573
VDAC1	4.37782	0.0271625	0.095839	0.310186	0.999573
RYR1	10.5813	0.0508944	0.10613	0.145614	0.999573
CDH15	12.3562	0.0805091	0.131891	0.0644571	0.999573
PSMG3	11.3829	0.0141321	0.0882103	0.679383	0.999573
RPS9	6.77511	0.0479405	0.10503	0.148755	0.999573
NBL1	7.59898	-0.00775076	0.0890534	0.798676	0.999573
ATP5MC3	2.98454	0.0266347	0.0967819	0.256279	0.999573
SULT1C4	11.8079	0.00264398	0.0858004	0.942619	0.999573
SERPINH1	5.46945	-0.0351136	0.0983514	0.364016	0.999573
CACNA1S	7.82948	0.0267942	0.0944456	0.367381	0.999573
LAMB1	7.17323	0.131114	0.264455	0.0127858	0.775962
CTTN	7.86214	0.0254163	0.0920979	0.447554	0.999573
MALRD1	10.3575	0.669489	0.28668	0.000850922	0.170827
PGK1	3.52233	0.0126721	0.092542	0.585672	0.999573
ARMCX3	6.27782	0.0522322	0.108483	0.121611	0.999573
ZNF470	12.1011	-0.00270563	0.0862203	0.93822	0.999573
CAPN6	3.38228	0.0028813	0.0915157	0.90077	0.999573
TMEM132A	8.0193	0.022874	0.0923911	0.460432	0.999573
EIF4A2	6.41864	0.0069005	0.0897125	0.81274	0.999573
PABPC1	6.94786	0.02011	0.0935456	0.441445	0.999573
HIPK3	4.46747	0.040697	0.10316	0.129795	0.999573
KRAS	9.34379	0.0172166	0.0890544	0.609048	0.999573
FBXO15	4.25475	-0.682545	0.400989	0.00197303	0.308553
RPL36A	4.65652	0.041444	0.103693	0.122996	0.999573
IDH2	3.69495	0.0324635	0.098735	0.205547	0.999573
EHBP1L1	6.9252	0.0444576	0.102759	0.174018	0.999573
RPLP2	3.69444	0.0453755	0.106995	0.0812747	0.999573
RAN	5.36037	0.0218029	0.094061	0.398562	0.999573
SEPTIN9	6.19537	0.481336	0.50694	0.00771803	0.62885
CYB5R1	5.77392	0.0416003	0.102805	0.147328	0.999573
ACO2	3.17736	0.0145969	0.0930454	0.525399	0.999573
H2AJ	5.02921	-0.00871839	0.0910877	0.732293	0.999573
EIF4H	4.91838	-0.00476265	0.090445	0.857051	0.999573
ATAD3A	7.6562	-0.022806	0.0921276	0.46152	0.999573
DDRGK1	5.3217	0.000894281	0.0901613	0.975105	0.999988
ANKRD36	13.9582	0.0131211	0.0869277	0.720461	0.999573
GTF2I	7.53091	0.0274641	0.093424	0.39522	0.999573
FKBP10	7.51437	-0.018236	0.0904829	0.576038	0.999573
RPL35A	5.76566	0.00527668	0.0913125	0.828192	0.999573
YWHAG	3.39056	0.0493492	0.109935	0.0630791	0.999573
RAB1A	5.29242	0.0372313	0.100013	0.197933	0.999573
COL12A1	6.08852	-0.0575501	0.114834	0.0653668	0.999573
BCL2L2	10.4347	0.026051	0.0916263	0.448802	0.999573
UBB	3.54521	-0.00731798	0.0915359	0.759053	0.999573
GSN	3.97937	-0.0145629	0.0922529	0.566153	0.999573
GNAI2	4.09363	0.0319113	0.0987174	0.200054	0.999573
ZNF574	9.97599	0.0593929	0.111171	0.124806	0.999573
SMPX	2.78942	0.0299335	0.0983716	0.196519	0.999573
EMC10	4.85936	0.00583832	0.0905884	0.829245	0.999573
MYBPC2	3.15389	-0.0204827	0.0946803	0.368118	0.999573
TRIP12	6.10474	0.0950176	0.163051	0.0244011	0.931873
NEBL	3.43145	-0.0123858	0.0926152	0.587719	0.999573
NRAP	2.33463	0.0080803	0.093294	0.636974	0.999573
RPL13A	4.49631	0.0520008	0.110392	0.0872314	0.999573
MAP1A	3.23833	0.0127125	0.0928445	0.570822	0.999573
RAPGEF1	4.60435	0.0363257	0.0998625	0.19628	0.999573
ARHGDIA	7.52972	0.0146244	0.0904642	0.610618	0.999573
CYP2A6	10.2867	0.0511452	0.103541	0.169163	0.999573
CD81	4.69789	0.040633	0.102051	0.164377	0.999573
RPL12	5.38581	0.0741355	0.133598	0.0314958	0.978984
ZFAND3	4.96386	-0.0260405	0.0946414	0.359125	0.999573
HSP90B1	6.12346	-0.0303067	0.095739	0.316485	0.999573
SKP1	5.07926	-0.0129884	0.091324	0.630607	0.999573
FNDC3B	5.42338	0.0630179	0.119818	0.0566076	0.999573
MDH1	3.14856	0.0174143	0.0937775	0.449427	0.999573
RPN1	4.91933	-0.0040839	0.0906022	0.875223	0.999573
HNRNPD	7.41292	-0.00157627	0.0893115	0.95709	0.999823
NBPF14	8.85854	-0.00311231	0.0882437	0.920402	0.999573
MAP2K7	5.77093	0.0414219	0.101475	0.187147	0.999573
PRDX2	3.9266	0.0107813	0.0920493	0.650951	0.999573
HNRNPH1	11.063	-0.00818618	0.087108	0.812408	0.999573
SLC39A7	5.96962	0.0143599	0.0916619	0.594415	0.999573
TRIM51	8.1858	-0.0490768	0.103788	0.192218	0.999573
VAMP8	9.61002	-0.00533142	0.0880914	0.866653	0.999573
RPN2	4.6412	0.0332593	0.0985836	0.218598	0.999573
PDLIM4	5.91005	0.0344807	0.0989655	0.217472	0.999573
CALM3	7.07118	-0.0223007	0.0920311	0.475566	0.999573
CRIP2	5.0007	0.0686891	0.130909	0.0135296	0.793348
SFPQ	8.17061	0.0390549	0.0994946	0.228804	0.999573
OCIAD1	5.24695	0.0962788	0.169293	0.0179517	0.872776
C4orf54	3.45337	0.0313255	0.0986325	0.197683	0.999573
CAV3	4.73556	0.0871995	0.154768	0.0176655	0.872776
PSMD2	3.92579	-0.000747971	0.0908665	0.975111	0.999988
RPL36	4.9727	0.0270661	0.0958269	0.309994	0.999573
FCF1	14.3082	0.335004	0.264228	0.00773657	0.62885
PRMT1	4.99279	0.0238074	0.0943486	0.383218	0.999573
YWHAE	4.52612	-0.00677504	0.0907438	0.794397	0.999573
GPRC5B	6.08215	0.0004645	0.0897526	0.987613	0.999988
NEXN	4.53178	0.026655	0.0959503	0.30469	0.999573
PNN	9.40153	0.00745897	0.0881096	0.820697	0.999573
OAZ1	5.01692	0.00156545	0.0904667	0.950788	0.999573
ATP1B1	3.67154	-0.0151811	0.0928003	0.529794	0.999573
TRIM28	6.98866	0.0080569	0.0889553	0.798357	0.999573
ATRX	9.50375	0.0374576	0.0976548	0.266276	0.999573
TPPP3	3.59112	0.0612743	0.120869	0.0323278	0.979175
EIF2S3B	8.40482	0.031344	0.0943469	0.353141	0.999573
IGHG4	8.23898	0.00730077	0.0884323	0.82018	0.999573
GRB2	4.44527	0.00869466	0.0911633	0.734439	0.999573
COX5A	3.08041	0.0266247	0.0970486	0.236327	0.999573
USO1	4.00993	-0.00876901	0.0914437	0.716545	0.999573
SRGAP2B	6.4873	0.0476305	0.104722	0.156893	0.999573
TGFB3	5.22574	-0.0417951	0.10298	0.144163	0.999573
CARD9	6.25118	-0.0255695	0.0932037	0.409411	0.999573
SEPTIN5	5.82035	-0.00374852	0.0897535	0.892901	0.999573
TLN1	4.86203	0.011899	0.0911101	0.661686	0.999573
NFAM1	9.82624	0.0151509	0.0881881	0.658822	0.999573
SERF2	5.80924	0.0419333	0.102695	0.154656	0.999573
DDOST	4.20292	-0.00501707	0.0907557	0.845468	0.999573
DNM2	8.54531	0.0293214	0.09569	0.317779	0.999573
EIF4B	4.18953	0.0236657	0.0948971	0.35617	0.999573
PXDN	5.25766	-0.039244	0.101618	0.192081	0.999573
DLGAP4	4.6287	0.026677	0.0953828	0.330326	0.999573
MTCH1	4.13327	0.00755178	0.0915056	0.755345	0.999573
VASH2	8.44166	0.0528788	0.107211	0.14193	0.999573
ADCY6	7.97006	-0.0133683	0.0890558	0.679979	0.999573
PPP2CA	3.93648	-0.00778115	0.0916288	0.740374	0.999573
CAP2	3.81748	0.0146292	0.0926168	0.548097	0.999573
ZNF714	11.131	0.00539527	0.0868876	0.874207	0.999573
GRINA	5.04188	0.0173456	0.0922987	0.523449	0.999573
TGFBI	4.83849	0.00367849	0.09208	0.861506	0.999573
HTRA1	3.49846	-0.10392	0.20548	0.00186297	0.30704
HLA-DQB1	3.08468	0.0126021	0.0930898	0.552848	0.999573
EDF1	4.52642	0.0315106	0.0974443	0.256569	0.999573
APOO	7.83721	-0.00261633	0.0883547	0.926689	0.999573
TRDN	3.59143	0.0575696	0.117769	0.0315095	0.978984
PABPC4	5.4643	1.00299	0.403056	0.000709374	0.157368
CHRNB1	6.18322	-0.00648746	0.0897199	0.820707	0.999573
RPLP0	4.05018	0.0404716	0.10397	0.0949782	0.999573
EMX1	9.2817	0.00777909	0.0876403	0.817555	0.999573
TSPAN9	5.07447	0.0217718	0.0935843	0.425684	0.999573
WWTR1	3.30816	0.00849241	0.0922117	0.700891	0.999573
EIF1	5.11591	0.0245295	0.0943808	0.37872	0.999573
KLHL31	3.05375	0.00811703	0.0920729	0.71703	0.999573
RPS29	5.34196	0.025253	0.0946478	0.364115	0.999573
AGL	4.61637	0.063185	0.122007	0.0377787	0.979175
MYH4	2.00101	-0.0580637	0.120879	0.0050975	0.509953
PRRC2A	5.18709	0.0778635	0.137869	0.0308111	0.978984
PRRT2	6.86116	-0.0468352	0.104881	0.141068	0.999573
SIGLEC16	9.00123	0.096738	0.155115	0.0423203	0.995764
SEMA6C	4.40889	0.0382795	0.101501	0.156765	0.999573
KRTAP10-10	9.72081	0.0209967	0.0905213	0.529016	0.999573
TPM4	4.28614	-0.00070479	0.0911263	0.975419	0.999988
RGS18	7.90498	0.0091329	0.0893112	0.764746	0.999573
MLLT11	2.7802	0.0117731	0.0929638	0.580214	0.999573
NEGR1	10.1096	0.00269293	0.0873405	0.930015	0.999573
KDM4B	4.56947	0.00213307	0.0906926	0.93351	0.999573
LOXL1	4.31559	0.0279364	0.0971794	0.238788	0.999573
IGHMBP2	3.80185	0.00647366	0.0914032	0.787944	0.999573
MYH2	2.20288	0.0101187	0.0931006	0.603893	0.999573
RNF113A	8.6575	0.0119099	0.088791	0.713911	0.999573
LAMC1	5.32072	0.060267	0.11643	0.0721851	0.999573
ZFP36L1	6.09864	-0.0140201	0.0906852	0.632397	0.999573
RPS16	3.83761	0.0276089	0.0972618	0.23447	0.999573
PDZRN3	4.76655	0.0128105	0.0915655	0.628805	0.999573
HNRNPH3	7.47293	0.000367815	0.0884349	0.991458	0.999988
IGF2R	5.09628	0.067813	0.125899	0.0389769	0.979175
MFAP4	4.23892	0.00209948	0.0912041	0.930356	0.999573
USP22	6.55469	-0.00984184	0.0896733	0.741496	0.999573
ATP2B1	6.48675	0.0271063	0.0944057	0.371107	0.999573
SDCBP	3.13673	0.0256252	0.096557	0.259016	0.999573
EWSR1	7.07789	0.00607015	0.0888243	0.844553	0.999573
MYOZ2	3.62523	0.0200587	0.0945612	0.377713	0.999573
HNRNPK	4.69018	0.0366484	0.100533	0.177046	0.999573
RBM24	5.39161	-0.0174965	0.0918347	0.537248	0.999573
ITGA5	5.39869	0.0698411	0.126402	0.0503187	0.999573
RPL23	4.70388	0.0450475	0.10582	0.105415	0.999573
SON	6.0447	0.0810082	0.140664	0.0342403	0.979175
RBP1	4.16973	0.0652016	0.124698	0.0298941	0.978984
SLC25A19	8.75063	-0.0322868	0.0965746	0.290761	0.999573
ZYX	5.32879	0.0489268	0.106903	0.122241	0.999573
IFI6	4.1004	0.0286274	0.0966523	0.2762	0.999573
LAPTM4A	4.21562	0.0123416	0.0917955	0.629424	0.999573
ATP5PF	2.97781	0.00319015	0.0918003	0.884693	0.999573
CDK2AP1	4.43224	0.0307261	0.0974113	0.255787	0.999573
ENO1	6.17509	0.0200504	0.0923138	0.490169	0.999573
UGP2	3.49236	0.023255	0.0954605	0.316989	0.999573
LCE2D	14.0136	1.1561	0.30494	8.76442e-06	0.00641157
OVOL1	7.24925	0.067631	0.120836	0.0768323	0.999573
HNRNPUL1	3.50092	0.0258358	0.0958441	0.308819	0.999573
PPP3R1	3.55554	-0.00309256	0.0914155	0.892836	0.999573
RTL1	2.51098	0.0332285	0.100353	0.133897	0.999573
HS6ST2	6.85227	0.0245342	0.0934935	0.411107	0.999573
ATP1B4	3.00673	0.0237216	0.0959166	0.293158	0.999573
HSP90AA1	4.56473	0.00617039	0.0910151	0.806371	0.999573
CAPRIN1	5.22653	0.0439462	0.103696	0.14937	0.999573
ILF3	8.14863	0.050537	0.107098	0.13112	0.999573
SLFNL1	8.0116	0.502074	0.411337	0.00601683	0.556522
JPH2	5.87535	0.00978252	0.0904988	0.72695	0.999573
HGF	3.14467	-0.0175656	0.0935357	0.460327	0.999573
INTS6L	10.2008	-0.13083	0.20642	0.0277615	0.962502
SULF1	4.00275	-0.0730504	0.135023	0.0175993	0.872776
CTHRC1	5.21794	-0.507987	0.396661	0.0041781	0.46696
H1-0	4.53614	0.0325502	0.0981708	0.232111	0.999573
RPS6KB1	8.44765	-0.00582039	0.0879713	0.857694	0.999573
MAP2K1	3.43097	0.0268837	0.0967691	0.258946	0.999573
ACHE	4.4143	0.053884	0.112308	0.0730121	0.999573
HMGN1	8.52702	0.0738185	0.126863	0.0645033	0.999573
NCOR2	5.46593	0.0149126	0.0912103	0.602923	0.999573
YBX3	3.02116	-0.0371245	0.102081	0.114881	0.999573
ZNF625	12.0131	-0.0502497	0.101231	0.205941	0.999573
COX6B1	3.47538	0.0206693	0.094353	0.385106	0.999573
ZNF417	10.5961	0.0180456	0.0889818	0.602613	0.999573
ZNF540	7.93046	-0.0409715	0.098837	0.241076	0.999573
CFAP410	4.27278	-0.016311	0.0927651	0.513684	0.999573
ATP1A2	6.90632	0.776486	0.403659	0.00199388	0.308553
ACTR3	3.99837	0.00293676	0.0911177	0.904502	0.999573
MCL1	4.37494	0.0341644	0.0992925	0.200162	0.999573
CCT3	4.89377	0.0545137	0.112517	0.0734041	0.999573
NONO	5.78383	0.059097	0.115187	0.0777998	0.999573
ZNF207	6.1592	0.00502429	0.0895602	0.863506	0.999573
MAPRE1	4.31691	0.017774	0.0927574	0.49923	0.999573
DIO1	3.4887	-0.0126549	0.0923795	0.593193	0.999573
SRPK3	5.46436	-0.00519736	0.0904688	0.842806	0.999573
PKMYT1	4.50756	0.0149002	0.0920838	0.572689	0.999573
EVL	6.15716	-0.0189669	0.09259	0.490453	0.999573
PPP3CB	5.13839	0.0197648	0.0926238	0.483786	0.999573
SYNCRIP	4.75924	-0.00308106	0.090451	0.906446	0.999573
MSL1	5.33607	0.0056905	0.0901406	0.837012	0.999573
SH3GLB1	3.72167	0.0198145	0.0939856	0.418419	0.999573
EIF3K	3.71098	0.0239985	0.0951645	0.337432	0.999573
SEPTIN11	6.56944	0.00701164	0.0897783	0.808329	0.999573
DAPK3	4.44052	0.00490139	0.0909475	0.846163	0.999573
TNNI1	4.7004	0.731976	0.494757	0.0043599	0.471713
PTOV1	6.21365	0.0399488	0.101206	0.177807	0.999573
TM9SF3	3.83429	-0.0110671	0.0919946	0.645576	0.999573
COL4A2	6.1661	-0.0796039	0.142657	0.0184107	0.887133
SOX4	5.73331	-0.0760235	0.133747	0.037649	0.979175
CLTC	4.47111	-0.0246353	0.094637	0.36213	0.999573
ARL2	8.54387	0.00967128	0.0887991	0.760076	0.999573
CDC42	4.05817	-0.00314484	0.0908175	0.896221	0.999573
PSMC1	2.85942	-0.00118643	0.0916525	0.957206	0.999823
ACTN4	6.1322	0.0726782	0.129821	0.0432301	0.999573
TMOD1	3.04658	0.0265499	0.0971923	0.223703	0.999573
SSR2	5.5021	0.00655499	0.0899465	0.814044	0.999573
FAM83E	4.28189	-0.00523601	0.0912098	0.824793	0.999573
ANXA5	4.74891	0.0140459	0.0917928	0.598405	0.999573
MYH10	4.62494	-0.0250333	0.0950602	0.340043	0.999573
H3-3A	4.65663	0.0211945	0.093848	0.417028	0.999573
ANXA2	5.3093	0.0294991	0.0967297	0.274782	0.999573
MPZL1	6.73248	0.0742161	0.129452	0.0541538	0.999573
RELL1	6.23214	0.00796329	0.08972	0.785636	0.999573
TAF15	6.47317	0.013921	0.0901051	0.649447	0.999573
CD151	4.54995	0.0570473	0.115458	0.0562499	0.999573
ADAM19	5.6381	0.0375415	0.100614	0.181974	0.999573
PSMB7	3.56041	0.0176312	0.0933851	0.468975	0.999573
TRIM54	7.57012	0.0162397	0.0920926	0.54697	0.999573
CCT6A	3.74698	-0.0109208	0.0916026	0.65318	0.999573
NFIC	4.24749	0.0141928	0.0922971	0.574496	0.999573
CDKN2D	9.67203	0.0178085	0.0897759	0.591066	0.999573
COL4A1	5.55469	-0.492078	0.413179	0.00474363	0.493374
VDAC2	3.28472	0.03136	0.0986137	0.2007	0.999573
SEC31A	5.12469	-0.00093967	0.0909935	0.968415	0.999988
CDV3	3.61854	-0.00769544	0.0921427	0.724708	0.999573
FKBP3	4.37453	0.00891049	0.091271	0.727252	0.999573
HMGN2	4.79534	0.0108255	0.091384	0.675736	0.999573
XRCC5	4.35352	0.0598176	0.117735	0.0544951	0.999573
SSRP1	7.12658	0.0620844	0.116856	0.0827422	0.999573
XRCC2	9.41794	-0.0603064	0.110328	0.129588	0.999573
RPL14	3.42106	-0.00872905	0.0920101	0.701331	0.999573
SAP18	3.15543	0.0203788	0.095117	0.333735	0.999573
UPK3BL1	8.4505	0.035486	0.0963858	0.294805	0.999573
ERBB2	5.20607	0.00195691	0.0897914	0.945421	0.999573
NOMO3	4.53604	0.0239912	0.0946728	0.364546	0.999573
ZNF500	9.01523	0.0149238	0.0899689	0.634036	0.999573
DDX50	7.94338	0.000927386	0.0879361	0.969533	0.999988
UQCRC1	3.45837	0.00616261	0.0914307	0.798634	0.999573
LTBP4	4.83876	-0.0533919	0.112156	0.0642134	0.999573
XIRP2	2.56242	-0.0328503	0.10025	0.128628	0.999573
EID1	3.17059	0.0539747	0.11439	0.0401306	0.979175
RNF187	3.53161	0.0143745	0.0927773	0.544195	0.999573
SLC38A2	5.83171	-0.0606853	0.117539	0.0593853	0.999573
PDXDC1	5.59838	-0.00168226	0.0900309	0.950086	0.999573
TNIP1	2.67697	0.0235509	0.0961362	0.27297	0.999573
PXN	7.16237	-0.0303135	0.0950947	0.328711	0.999573
NRBP1	3.92156	-0.0638536	0.122999	0.0310793	0.978984
CBX5	4.47452	0.0259775	0.0957697	0.308875	0.999573
RGS2	4.17186	0.761416	0.469897	0.00395591	0.448356
CSPG4	4.96099	0.0618321	0.119292	0.0589203	0.999573
NBPF19	7.14301	0.0147757	0.0906974	0.619887	0.999573
SNRNP70	9.45211	0.0492977	0.104198	0.169866	0.999573
RASSF4	4.94788	-0.00293229	0.0905971	0.907644	0.999573
SEPTIN2	4.09751	-0.0191227	0.0933848	0.45129	0.999573
AGO2	3.99464	0.00934934	0.0912227	0.71792	0.999573
RPLP1	2.7396	0.0233983	0.0963352	0.252243	0.999573
NPLOC4	4.28267	0.0219061	0.0940434	0.404788	0.999573
CTSD	4.4903	0.0101355	0.0913262	0.695046	0.999573
ACADVL	6.75779	-0.0204406	0.0922585	0.484167	0.999573
TLK2	7.18924	0.0415412	0.101289	0.190345	0.999573
CCS	6.33538	0.0239352	0.093332	0.42199	0.999573
PCOLCE	4.27851	-0.0222941	0.0948817	0.354547	0.999573
CAVIN4	4.21375	0.0205673	0.0945882	0.373694	0.999573
HNRNPR	5.33214	0.0189172	0.0927258	0.488028	0.999573
ASPH	5.90279	0.0225737	0.0931729	0.430754	0.999573
MMP2	3.7565	-0.0475913	0.108243	0.0761686	0.999573
SEMA6A	7.38003	0.00885752	0.0911025	0.732877	0.999573
SND1	4.30676	-0.0362031	0.0998599	0.19374	0.999573
SLC36A4	5.98693	0.545078	0.48625	0.00631567	0.561818
MAP3K13	7.81337	-0.0159739	0.0902395	0.605516	0.999573
RPS15A	4.62507	0.0753244	0.135962	0.0269496	0.954677
ANGPTL1	2.84924	-0.0311302	0.0988335	0.18367	0.999573
NUCB1	4.02631	-3.64907e-05	0.0911586	0.997497	0.999988
PLEKHA4	7.79785	-0.00333828	0.0887212	0.892312	0.999573
NUDC	3.80299	0.001193	0.0911684	0.961123	0.999988
C4orf3	4.79606	0.0490074	0.108334	0.0927571	0.999573
SACS	4.52091	0.0485276	0.107658	0.103421	0.999573
USP9X	3.82715	0.0184711	0.0936426	0.444972	0.999573
QARS1	4.01843	0.0293464	0.0972332	0.257381	0.999573
FUBP1	5.8411	0.0750095	0.132065	0.0466331	0.999573
UQCRHL	3.13513	-0.0191567	0.0942998	0.395813	0.999573
FSCN1	5.0435	0.036601	0.100396	0.181582	0.999573
KCNH3	7.80309	0.00877634	0.0888833	0.775864	0.999573
SMAD7	6.62787	0.0114362	0.0900535	0.699807	0.999573
ITGA7	5.6881	0.0201523	0.0931812	0.452765	0.999573
EIF3E	3.68953	0.0357687	0.100877	0.151622	0.999573
RAB2A	3.43277	0.0319679	0.0991905	0.175852	0.999573
POLR2A	4.16895	0.0256253	0.0956044	0.318724	0.999573
EIF3F	3.45094	0.0421824	0.1044	0.111309	0.999573
SPON2	6.56348	0.00160863	0.0912664	0.94742	0.999573
PSMD3	3.75065	0.00740228	0.0915687	0.756986	0.999573
RNF11	3.36406	0.0219498	0.0949094	0.355147	0.999573
ZNF768	7.61576	0.0166023	0.0902074	0.600578	0.999573
CCT7	2.52899	-4.78636	0.25656	0.743314	0.999573
BOC	4.5444	-0.0663517	0.124665	0.0360777	0.979175
NUDT8	2.73884	-0.00270916	0.0918486	0.898535	0.999573
MTRNR2L1	3.23794	-0.0107646	0.0928489	0.602693	0.999573
TEAD4	4.63171	0.0213121	0.0941361	0.406486	0.999573
NEFM	3.81709	0.0378423	0.101694	0.148908	0.999573
SRSF9	6.44578	0.0192022	0.0921962	0.507091	0.999573
SF1	4.66807	-0.00501826	0.0905655	0.846984	0.999573
PPP2R3B	5.43489	0.0461987	0.106189	0.108991	0.999573
UBE2H	4.73118	0.0442007	0.104421	0.133928	0.999573
ADPRS	7.72566	0.0209233	0.0916868	0.5026	0.999573
DDR1	4.639	0.0204443	0.0932635	0.449805	0.999573
CSTF3	7.96025	0.0854579	0.142097	0.0451963	0.999573
NYAP1	8.0003	0.0188741	0.0905223	0.55903	0.999573
HLA-DQB2	6.92705	0.00810389	0.0900337	0.778833	0.999573
RAD21	4.59023	0.00160096	0.0909625	0.949356	0.999573
CCNG2	5.71256	0.000649585	0.0898101	0.982076	0.999988
MAP7D1	4.80351	0.0131941	0.0914042	0.625708	0.999573
MYLK4	7.29151	-0.0188354	0.0912954	0.533441	0.999573
ADPRHL1	2.57615	0.00831612	0.09247	0.694187	0.999573
NDUFS2	2.73065	0.0243092	0.0962631	0.270619	0.999573
BRD4	3.70618	0.0138734	0.0925184	0.567011	0.999573
CCDC51	1.73502	-0.00937882	0.0934208	0.590317	0.999573
PDHA1	2.34809	-0.00183853	0.0924317	0.922199	0.999573
SUPT5H	3.95385	0.0180733	0.093173	0.477413	0.999573
RPS10	3.83913	0.0204672	0.0944954	0.380672	0.999573
RCC2	7.34729	0.048231	0.10422	0.168161	0.999573
ECPAS	3.84535	-0.01082	0.0918206	0.656111	0.999573
MATR3	4.15995	0.0144647	0.0921848	0.57569	0.999573
MYL2	1.72062	-0.0377889	0.104228	0.0339637	0.979175
RHOC	3.21097	-0.0133881	0.0927079	0.566668	0.999573
KLC1	4.87228	0.0347983	0.0991786	0.210854	0.999573
NOTCH2NLA	7.69429	-0.00231772	0.0881887	0.940907	0.999573
RAB1B	4.63323	-0.0168629	0.0922616	0.526629	0.999573
MAT2A	6.40482	0.189502	0.751468	0.0123506	0.771197
CLEC3B	2.26354	0.00747505	0.0927801	0.699352	0.999573
BGN	3.70924	-1.13217	0.349266	3.89693e-05	0.0208943
PNISR	6.32791	0.00713935	0.0895759	0.809368	0.999573
RPS21	2.99027	0.0292028	0.0980852	0.203579	0.999573
CCN2	4.57698	0.022786	0.0945909	0.371343	0.999573
SEC61A1	5.514	0.0270152	0.0955781	0.319814	0.999573
REPIN1	4.78579	0.0273902	0.0955516	0.321654	0.999573
ANTXR1	5.194	-0.00691142	0.0911182	0.781106	0.999573
H3C13	5.23239	0.00707624	0.0916345	0.765727	0.999573
PSMD1	6.22651	0.0500017	0.10759	0.116809	0.999573
ADAMTS9	3.94639	-0.0511772	0.110753	0.0648907	0.999573
DST	5.36745	0.00719317	0.0905432	0.789076	0.999573
SEC62	3.24016	-0.0141012	0.0928613	0.54144	0.999573
CUX1	4.10423	0.0324192	0.0981941	0.23015	0.999573
TIMP2	4.70649	-0.0234071	0.0943567	0.380927	0.999573
SLC25A5	3.31412	0.0219991	0.0950156	0.346535	0.999573
MYOM2	3.37133	0.0401796	0.103949	0.0929377	0.999573
MRPS16	6.57074	0.0234332	0.0928601	0.439275	0.999573
DCTN2	3.80711	-0.0162795	0.0930304	0.499695	0.999573
KCNAB3	9.20223	0.0559525	0.111111	0.103813	0.999573
CYP2W1	5.22959	0.0616766	0.119153	0.0532736	0.999573
EPB41L3	4.64386	0.0553995	0.114054	0.0596597	0.999573
HLA-DRB1	5.72294	-0.0258373	0.0940077	0.381189	0.999573
GANAB	4.87792	-0.0153369	0.0918942	0.567992	0.999573
TRIR	4.7199	-0.00792558	0.090645	0.76662	0.999573
DAG1	4.39895	0.0493394	0.109091	0.0799336	0.999573
NFKB2	3.68803	0.00750115	0.0914698	0.757968	0.999573
H3-3B	4.66636	-0.0151441	0.0922065	0.559304	0.999573
IGFBP7	3.41743	-0.0233686	0.0954969	0.312324	0.999573
BRD3	4.50003	0.0208109	0.0934683	0.43956	0.999573
UBA1	4.30698	-0.0176474	0.0929623	0.491648	0.999573
ATP5PD	3.13104	0.030879	0.0986737	0.19147	0.999573
HSPB3	3.52436	0.6684	0.728928	0.00797812	0.637394
XRCC6	3.20812	0.00412594	0.0914947	0.825639	0.999573
GIT2	5.91353	0.0134819	0.091678	0.610891	0.999573
TMEM170A	4.4817	-0.0651074	0.123593	0.0354111	0.979175
NNAT	3.7236	-0.0343528	0.100009	0.16537	0.999573
GCNT2	2.59143	0.0029376	0.0923739	0.879386	0.999573
KLHL40	3.55592	0.0103666	0.0920073	0.662912	0.999573
SERINC1	2.98075	-0.00430159	0.0919517	0.840424	0.999573
PGRMC2	3.87634	0.00903963	0.0919075	0.698189	0.999573
PRDX6	3.32916	0.0219138	0.0950681	0.342093	0.999573
ANTXR2	4.32393	0.0444372	0.105591	0.104893	0.999573
C1S	2.56499	0.00926803	0.0928948	0.639318	0.999573
EMP3	3.34025	0.0022156	0.0916292	0.921694	0.999573
HMX1	6.32592	-0.00565756	0.08948	0.846287	0.999573
PARK7	4.61269	0.0205914	0.093322	0.44559	0.999573
ARL6IP4	4.37772	0.00425658	0.0905143	0.872254	0.999573
CDK16	3.71592	0.00297798	0.0910608	0.902849	0.999573
PRDX1	3.05976	-0.0018236	0.0916847	0.933268	0.999573
PCM1	5.47485	-0.0168873	0.0916762	0.553166	0.999573
KCNE5	2.6909	0.00602616	0.0925999	0.785936	0.999573
COL5A3	3.56476	0.843312	0.545908	0.00455625	0.482422
EIF3L	3.01133	0.0377606	0.102817	0.0964399	0.999573
ITFG1	3.64645	-0.0186615	0.0936304	0.444154	0.999573
LRP1	3.6799	-0.0444687	0.105945	0.0919014	0.999573
SAAL1	7.70451	0.0603824	0.114958	0.0899999	0.999573
NCBP2	7.48751	0.0212918	0.0911725	0.515828	0.999573
MORF4L2	3.77355	0.0457555	0.107108	0.0809496	0.999573
KIF5B	3.85981	0.0322603	0.0988573	0.197521	0.999573
BSG	4.25623	0.00794873	0.0911198	0.755126	0.999573
C16orf78	5.66441	0.0216768	0.0926133	0.467415	0.999573
CD99	3.52985	0.00221687	0.0914223	0.923423	0.999573
TFG	3.12959	0.0143235	0.0928735	0.539855	0.999573
CHRNG	7.51718	0.00558938	0.0901122	0.840723	0.999573
ZNF346	8.16583	0.0314478	0.0941309	0.359411	0.999573
PBX2	6.35271	-0.026335	0.0944668	0.366826	0.999573
CHTOP	4.07014	0.00268321	0.0908112	0.915695	0.999573
MPRIP	3.76881	0.0282724	0.096604	0.277923	0.999573
ATP5MF	3.39983	0.0119214	0.0924688	0.604393	0.999573
ZNF707	3.11855	-0.00516473	0.0919408	0.810293	0.999573
MTCH2	4.57884	0.0022105	0.090694	0.935437	0.999573
YME1L1	5.09141	0.00405049	0.0900721	0.883964	0.999573
AFF4	4.34871	0.0150174	0.0929498	0.524486	0.999573
ATP2B4	5.13175	0.0408739	0.102143	0.150572	0.999573
ANKRD17	4.72163	-0.00136589	0.0905437	0.956769	0.999823
TBCA	3.27579	0.0233138	0.0956755	0.306924	0.999573
ATXN2L	5.09563	0.00194387	0.0904951	0.941279	0.999573
DNAJA4	3.91356	0.0245079	0.095314	0.33316	0.999573
ARHGAP23	6.54531	0.0471344	0.106268	0.118117	0.999573
TRIM72	3.50305	0.0370937	0.1016	0.138237	0.999573
PPP1R12B	3.60986	0.0737222	0.136206	0.0173545	0.872776
WDR44	4.98863	0.0358064	0.09979	0.196438	0.999573
SYPL2	2.56668	0.00284626	0.0924136	0.884245	0.999573
TTC3	4.92277	-0.0178889	0.0923997	0.512449	0.999573
SPTB	3.82787	0.0353344	0.100359	0.166127	0.999573
TSPAN3	5.45266	0.0413779	0.102064	0.172939	0.999573
PRRC1	3.49695	-0.0064762	0.0915787	0.781028	0.999573
CAPZB	3.55418	0.0246039	0.0959061	0.295592	0.999573
THRAP3	4.86376	0.00725584	0.0903781	0.791446	0.999573
SENP3	6.97185	0.0243229	0.0925878	0.444202	0.999573
MAPK1	4.43119	0.00430184	0.090809	0.865548	0.999573
RUSC2	3.79537	0.0103036	0.0918301	0.672236	0.999573
PFDN5	2.80128	0.0185942	0.0945558	0.381131	0.999573
TSC22D1	3.9514	-0.0590329	0.11762	0.0439512	0.999573
TACC2	3.88025	0.0443764	0.106131	0.0892666	0.999573
TUFM	3.7152	0.018771	0.0935245	0.451481	0.999573
CARD11	4.96562	-0.016102	0.0921502	0.545114	0.999573
CLIC4	3.21136	0.00544965	0.0917545	0.810595	0.999573
TSPAN13	2.92868	0.0119795	0.0926595	0.595181	0.999573
CRABP2	3.37283	-0.0609484	0.121271	0.0229803	0.931873
PIK3R1	4.7205	0.000674428	0.0902149	0.980802	0.999988
FAM20C	4.51751	0.00763684	0.0907713	0.774374	0.999573
NUTF2	3.23669	-0.0235595	0.0954318	0.31973	0.999573
DYSF	3.47833	0.00882926	0.0919607	0.704993	0.999573
RPL10L	4.88787	0.0200355	0.0928415	0.471782	0.999573
MED13	4.19534	0.014144	0.0922742	0.573836	0.999573
MGP	2.8131	-0.0587346	0.119306	0.0240675	0.931873
TUBB2B	3.50391	0.00988887	0.0919671	0.676085	0.999573
DAOA	5.64113	0.0242134	0.0934288	0.409476	0.999573
SGCD	3.99842	-0.0117709	0.0920268	0.628583	0.999573
ARPC2	3.71423	0.000102183	0.0912095	0.997286	0.999988
ANAPC5	3.83598	0.0112905	0.0919459	0.646675	0.999573
MYO1C	3.37898	0.0166698	0.0935048	0.471554	0.999573
IPO5	3.09023	0.0253187	0.0963587	0.265986	0.999573
FKBP1A	3.33834	0.0413387	0.105278	0.0648354	0.999573
TOMM7	2.31897	0.0150793	0.0939198	0.452906	0.999573
CCT5	3.80134	-0.0078026	0.0915248	0.744875	0.999573
ZNF669	8.86708	-0.0116342	0.0890754	0.714654	0.999573
GGA2	4.1809	0.0419405	0.10333	0.141323	0.999573
KLHDC3	3.83583	0.01476	0.0927058	0.542463	0.999573
ERMARD	3.82579	-1.6606	0.344716	6.49657e-08	0.00017426
CCT8	3.69096	0.0334179	0.100162	0.145886	0.999573
CNN2	5.07222	0.0585686	0.116085	0.0633242	0.999573
APLP2	3.50563	0.0200386	0.0945087	0.382869	0.999573
NDUFS3	3.18268	-0.0169292	0.0936852	0.456599	0.999573
SFRP2	3.73606	-0.0282956	0.0974458	0.228785	0.999573
DDX39B	7.33152	0.0570153	0.110894	0.11533	0.999573
PUF60	6.38216	-0.00206304	0.0893053	0.94293	0.999573
ZHX3	7.65876	0.0275717	0.0939582	0.380538	0.999573
ARHGEF2	5.32868	0.0377473	0.0998337	0.212919	0.999573
BICD1	5.97816	-0.678113	0.304914	0.000743131	0.157368
RPS26	4.4751	0.0354582	0.0996663	0.195504	0.999573
TGFB2	3.4922	-0.720795	0.426518	0.00233456	0.331329
UBE2V2	4.31469	-0.00910867	0.0914828	0.710627	0.999573
ATP1B3	5.38341	0.0591739	0.116085	0.0687943	0.999573
NUMA1	4.43819	-0.0181352	0.0928442	0.481326	0.999573
MAP3K7	4.2698	-0.0436173	0.104645	0.115903	0.999573
SRSF3	5.55965	0.00283986	0.0897569	0.920892	0.999573
SBDS	3.70671	-0.0128427	0.0924948	0.581867	0.999573
GPR87	3.14846	0.00243103	0.0915734	0.915089	0.999573
GNB2	3.47362	0.00566168	0.0916252	0.808102	0.999573
FBLN1	4.48525	-0.0350486	0.0994729	0.197028	0.999573
UQCR11	2.5654	0.0170878	0.0945386	0.384505	0.999573
ZC3H11A	5.17738	0.0126929	0.0910029	0.651905	0.999573
TUBA4A	2.05863	0.0304173	0.0995207	0.129581	0.999573
FNBP1L	3.98472	0.0234938	0.0947829	0.363212	0.999573
PTN	2.95117	-0.000944392	0.0917434	0.964671	0.999988
LAMB2	3.71099	-0.0142796	0.0924992	0.566636	0.999573
NPEPPS	4.77126	0.00836882	0.0908623	0.752029	0.999573
FGFRL1	2.84731	0.0305398	0.0985634	0.195536	0.999573
AP3D1	4.28495	0.00810611	0.0914486	0.743212	0.999573
UBR4	5.43229	0.0298124	0.0960049	0.306265	0.999573
PRRX1	3.28156	-0.0481371	0.109008	0.0656607	0.999573
PCID2	6.23322	0.0111314	0.0907414	0.688037	0.999573
RPS7	3.32082	0.0172488	0.0935144	0.465589	0.999573
AP2M1	3.49966	0.000747948	0.0912454	0.975434	0.999988
DPYSL3	3.23193	0.00999889	0.092281	0.658187	0.999573
TAGLN2	3.80861	0.0189802	0.0934974	0.453413	0.999573
IDH3B	3.19647	-0.0061874	0.091922	0.77995	0.999573
SH3BGR	2.66228	0.0150483	0.094125	0.43125	0.999573
RARA	4.73045	-0.0139829	0.0917169	0.597861	0.999573
SGCB	2.73509	-0.000989269	0.0917563	0.963101	0.999988
NPIPB3	9.36195	0.0152817	0.0893981	0.639681	0.999573
LGMN	3.34892	0.0147362	0.0931242	0.518907	0.999573
KPNA3	3.62858	-0.0148997	0.0928306	0.530145	0.999573
SEMA3C	3.86703	0.0544919	0.113929	0.0728319	0.999573
GPI	3.77643	-0.0389349	0.101969	0.145353	0.999573
MAPKAPK2	2.72268	0.025842	0.0968922	0.239131	0.999573
FITM1	3.1247	0.0410194	0.104328	0.0960059	0.999573
ZFHX4	3.92603	9.39631e-05	0.0908238	0.999445	0.999988
ITGAV	3.28476	0.00645431	0.0918302	0.775772	0.999573
CD276	4.52057	0.0307507	0.0972948	0.258089	0.999573
SPATS2L	4.47659	-0.00198357	0.0905441	0.938094	0.999573
ADNP	4.93161	-0.0558917	0.113343	0.069785	0.999573
RPL39	2.56954	0.0242777	0.0961795	0.278847	0.999573
RALY	3.91238	0.0318765	0.0985343	0.209026	0.999573
GALNT2	3.85152	-0.00280281	0.0910075	0.908485	0.999573
RAB7A	2.47999	0.000476674	0.0922339	0.981419	0.999988
CCT2	4.0749	-8.53678e-05	0.0909352	0.996353	0.999988
MCAM	5.20159	-0.00331376	0.0907805	0.894472	0.999573
SEMA6B	5.37308	0.0318443	0.0981136	0.234954	0.999573
NCOA1	5.76195	0.0197178	0.0931079	0.461175	0.999573
POLR2L	2.59124	-0.000820062	0.0920294	0.967695	0.999988
COPA	4.07902	-0.0372569	0.100789	0.170322	0.999573
RBM39	4.99565	0.0450022	0.105106	0.126674	0.999573
ZNF684	5.55743	0.669074	0.397659	0.0034074	0.397382
CXXC5	3.96406	-0.0155794	0.0927378	0.527464	0.999573
FURIN	2.80374	0.0163168	0.0938629	0.446892	0.999573
COL11A1	2.62581	-0.0654639	0.127495	0.0109761	0.748516
TCF4	3.57389	-0.0247787	0.0955446	0.318409	0.999573
PSMA7	3.19283	0.00349153	0.0916166	0.878805	0.999573
G3BP1	3.52269	0.0143831	0.0932421	0.516483	0.999573
LHFPL6	4.2185	-0.011917	0.091508	0.647071	0.999573
ILRUN	2.92854	-0.00459719	0.0918552	0.834503	0.999573
CDH11	4.73791	-0.107447	0.200777	0.00839502	0.649565
RALA	4.03887	0.0239674	0.0953341	0.329313	0.999573
NECTIN2	3.93019	0.00646298	0.0913391	0.790687	0.999573
CNBP	2.78279	0.0238766	0.0962775	0.263981	0.999573
EPN1	3.23284	-0.0132419	0.0927056	0.565409	0.999573
SOD1	3.00581	0.0155716	0.0938352	0.454025	0.999573
CASP2	6.89301	0.0559018	0.111328	0.103516	0.999573
JAM2	5.1241	0.000285095	0.0905927	0.991367	0.999988
WAC	3.02099	0.0139504	0.0930838	0.530205	0.999573
NCS1	3.63243	-0.0101594	0.0920048	0.663382	0.999573
SRSF2	4.96061	0.0520627	0.110793	0.076697	0.999573
ZNF208	6.49092	0.483625	0.414323	0.00678952	0.569117
TCAF1	2.9035	-0.0314428	0.0992081	0.164805	0.999573
PSMB5	2.74318	0.0450088	0.107502	0.059524	0.999573
TACC1	3.76945	0.0160455	0.0927424	0.523664	0.999573
COX4I1	3.07068	0.0176445	0.0938766	0.439883	0.999573
WASHC1	6.58405	0.0458485	0.10453	0.148465	0.999573
ATP5MG	3.10024	0.0228556	0.0953223	0.328577	0.999573
POU5F1	7.77866	-0.000967649	0.0889925	0.973112	0.999988
FERMT2	4.15336	0.0254718	0.0954025	0.328493	0.999573
TOMM20	3.11883	0.0341305	0.100055	0.164415	0.999573
GSTP1	4.47108	-0.00841506	0.0921055	0.70621	0.999573
TXNDC5	3.71012	-0.000392809	0.0910349	0.986063	0.999988
NCAM1	4.95515	0.000821892	0.090104	0.976863	0.999988
PNPLA2	3.29812	0.0381624	0.103275	0.0827583	0.999573
CSNK2B	3.52664	3.72406e-05	0.0911862	0.999537	0.999988
KIR3DL1	6.49605	-0.0126769	0.0899647	0.675652	0.999573
FAU	2.49954	0.0278797	0.0979145	0.194126	0.999573
PDIA6	3.06838	-0.0109037	0.0924537	0.626309	0.999573
RPS25	2.8812	0.0371248	0.102457	0.103275	0.999573
NDUFA4	3.42653	-0.00662964	0.0918368	0.767845	0.999573
COX6A2	2.37786	-0.00920206	0.0929098	0.638721	0.999573
COL24A1	3.68161	0.00983488	0.0918283	0.683507	0.999573
ATP5IF1	2.877	-0.000173943	0.0917341	0.992878	0.999988
ARHGEF40	4.52717	-0.103691	0.189739	0.00958264	0.694699
MICALL1	4.19262	-0.000229827	0.0909235	0.994044	0.999988
AKAP13	3.81281	0.00518303	0.0912657	0.830991	0.999573
MBD3	3.86691	-0.000606176	0.0907915	0.979921	0.999988
MYMK	3.79854	0.00160837	0.0910779	0.960779	0.999988
ANKRD1	4.01706	0.0184659	0.0952427	0.31029	0.999573
HSPB2	2.18396	0.0272653	0.0979174	0.185673	0.999573
LMOD3	3.07246	-0.0080116	0.0921371	0.713883	0.999573
HEATR5A	4.31474	-0.0336977	0.0991552	0.193194	0.999573
SLC7A5	3.16165	0.0136489	0.0929695	0.546711	0.999573
CSRNP2	4.64657	-0.00277473	0.0904473	0.915267	0.999573
CHMP6	5.36661	-0.0177222	0.0919054	0.531592	0.999573
ELN	4.00643	-0.0255581	0.095735	0.307323	0.999573
PLXNB2	5.56189	0.00424414	0.0901298	0.876464	0.999573
DLD	2.9123	0.0360965	0.102159	0.093336	0.999573
PLOD1	4.10417	-0.0311648	0.0978122	0.239169	0.999573
LMOD2	2.49909	-0.0265169	0.0977048	0.179214	0.999573
OAZ2	3.22803	0.0196755	0.0943619	0.393888	0.999573
TLE3	4.24281	-0.0101293	0.0915479	0.686522	0.999573
MAMDC2	4.78477	0.0564452	0.117637	0.0208153	0.925238
TM7SF3	5.29844	0.00414995	0.0898415	0.883757	0.999573
WIPF3	3.59565	0.0572756	0.11646	0.0456741	0.999573
PTP4A1	2.35337	0.000392177	0.0923233	0.983294	0.999988
H4C5	4.38364	0.0176845	0.0936036	0.457743	0.999573
PARVA	3.41096	0.0108206	0.0923157	0.635757	0.999573
ZNF350	5.67683	0.046247	0.104626	0.148337	0.999573
U2AF2	6.40496	-0.011212	0.0905681	0.688021	0.999573
NDUFV2	4.31227	0.0344886	0.0994604	0.195111	0.999573
RAB11B	3.05561	0.0231863	0.0958965	0.28829	0.999573
CD9	2.82622	-0.0149588	0.0934805	0.489879	0.999573
CALM1	3.64578	0.00777651	0.0916458	0.749252	0.999573
ARID1A	5.96551	0.0142195	0.0908986	0.624002	0.999573
EXOSC6	7.25641	-0.01295	0.0893937	0.681226	0.999573
STARD7	3.86221	0.0397511	0.102755	0.131148	0.999573
ABLIM3	4.68617	-0.0504413	0.109241	0.0880117	0.999573
KTN1	3.33815	0.003749	0.0917005	0.866778	0.999573
PHLDB1	5.19917	0.0105863	0.0911357	0.690439	0.999573
GHITM	2.26285	0.0167101	0.0942872	0.41216	0.999573
MTDH	3.00967	-0.0312228	0.0988798	0.181905	0.999573
FEM1B	2.90629	0.023513	0.0963288	0.256684	0.999573
XIRP1	3.12038	0.0154931	0.0939377	0.450363	0.999573
RBM8A	3.4007	0.0160749	0.0933874	0.483469	0.999573
WLS	3.27761	-0.00650455	0.0916762	0.779405	0.999573
SPG7	6.17158	-0.022223	0.0923447	0.460517	0.999573
SMIM40	7.20963	0.012761	0.089553	0.685596	0.999573
MEF2D	3.30325	-0.0154549	0.0931753	0.503207	0.999573
PPIAL4F	3.54352	-0.0243929	0.0954415	0.321267	0.999573
MLLT6	2.92713	-0.00415639	0.091709	0.851745	0.999573
GLIPR2	3.98512	0.0169383	0.0928384	0.506726	0.999573
BAG3	2.77185	-0.0213982	0.0955676	0.297181	0.999573
TMEM182	2.99222	0.0287721	0.0981872	0.189604	0.999573
EBF1	4.97719	0.0157799	0.0920324	0.55682	0.999573
RGMB	4.82334	0.0509751	0.109977	0.0821338	0.999573
SNRNP200	3.01682	-0.0111875	0.0924817	0.619336	0.999573
SEC63	3.97138	-0.0208623	0.0939345	0.411658	0.999573
UPK3BL2	6.94427	0.0340241	0.0970632	0.276601	0.999573
LUM	2.70372	-0.00381703	0.0922828	0.847259	0.999573
BANF1	2.3628	-0.0107388	0.0930961	0.587269	0.999573
SF3B1	5.53618	0.00721935	0.0901337	0.798352	0.999573
SESN3	3.31077	-0.0268218	0.0965754	0.266679	0.999573
CORO1C	4.40332	0.022676	0.0942404	0.390101	0.999573
DNMT3A	4.67173	-0.0353433	0.0992296	0.207856	0.999573
GORASP2	3.18696	0.0037406	0.0916112	0.869985	0.999573
PDAP1	3.0897	-0.000938176	0.0918392	0.96565	0.999988
U2AF1	4.79918	0.0175898	0.092169	0.52978	0.999573
MYO18A	4.9565	0.0225239	0.0942071	0.392774	0.999573
ARPP21	4.98489	0.00291082	0.0905247	0.911594	0.999573
FNDC3A	4.26992	0.0310583	0.0975145	0.252411	0.999573
EIF3B	3.67957	0.00737425	0.0917838	0.751811	0.999573
TCEAL9	3.98869	0.0320806	0.098671	0.205156	0.999573
BACH1	4.75138	0.0272889	0.0961873	0.292684	0.999573
PAM	3.16248	-0.0259789	0.0966035	0.257557	0.999573
RRAD	2.40593	-0.0241023	0.0967048	0.226513	0.999573
CTSA	3.30249	-0.0277883	0.0973452	0.227197	0.999573
CALM2	3.14167	-0.00907691	0.0920364	0.69416	0.999573
UBE2L3	2.92811	-0.009084	0.0923044	0.678733	0.999573
PABPN1	5.67896	0.0197042	0.0930449	0.464097	0.999573
EIF4G3	3.04345	0.038817	0.10276	0.118696	0.999573
NPC2	4.26861	-0.0325066	0.0983444	0.220183	0.999573
ZBTB7B	5.30185	-0.00895227	0.0904392	0.747113	0.999573
PSMC3	3.09962	0.0215799	0.0948874	0.357859	0.999573
ACAA1	5.55962	0.011332	0.090388	0.694503	0.999573
PRKDC	4.48551	0.0348491	0.0989672	0.218515	0.999573
SRP68	3.04546	0.00203407	0.0916522	0.927731	0.999573
FLNA	6.03682	-0.0301987	0.0957681	0.311994	0.999573
TCEAL8	2.96099	0.0175189	0.0943143	0.40206	0.999573
LRP6	3.71332	0.0164082	0.0934888	0.47378	0.999573
PBX1	3.49415	-0.0292832	0.0979494	0.206472	0.999573
AHDC1	4.00661	0.0107984	0.0917516	0.665318	0.999573
ITGA4	4.31622	-0.010688	0.0920245	0.653303	0.999573
EIF4EBP2	3.60334	0.000352466	0.0914613	0.988492	0.999988
OR56A4	4.1152	0.00162142	0.0907161	0.950255	0.999573
SOX11	4.88961	0.0403561	0.102337	0.151527	0.999573
GNL3L	3.7332	0.0199887	0.0942067	0.404162	0.999573
ATP2A3	2.61841	-0.0133574	0.0936477	0.494582	0.999573
DIO3	5.82502	0.00808262	0.0902694	0.772236	0.999573
RHOQ	4.46873	0.0211483	0.093996	0.407619	0.999573
KIAA1614	4.97033	0.00206588	0.0900962	0.94012	0.999573
NPFF	6.08094	0.038062	0.0996017	0.215998	0.999573
KANK3	7.08032	0.0271702	0.0945245	0.364377	0.999573
MXD4	4.03199	0.0126646	0.0920735	0.61385	0.999573
CCDC80	2.29136	-0.00574446	0.0925738	0.767204	0.999573
PRMT2	5.45	0.0174994	0.092347	0.521684	0.999573
CASP12	6.37146	0.0131213	0.0906452	0.651084	0.999573
SDC2	3.35834	0.0216012	0.0948814	0.353464	0.999573
ATXN7L3	3.38723	-0.014966	0.0929102	0.524773	0.999573
BRD2	3.91293	0.0305439	0.0975686	0.245135	0.999573
BMPR2	3.20219	-0.0446118	0.106545	0.0768934	0.999573
ACIN1	5.38402	0.020227	0.0928628	0.467927	0.999573
NID1	3.64975	-0.00465126	0.0911418	0.849068	0.999573
FARP1	3.25945	-0.00367543	0.0915522	0.871778	0.999573
DNAJB2	3.3632	-0.0249956	0.0957311	0.307647	0.999573
PPP5C	3.98384	-0.0318201	0.0978909	0.236105	0.999573
ASB5	3.16418	0.0166496	0.0945014	0.385646	0.999573
MYO18B	4.41273	0.0254066	0.0955764	0.318892	0.999573
SDHA	4.98154	0.610955	0.440382	0.00546009	0.523063
LRRC27	6.58442	0.034888	0.0973436	0.271694	0.999573
EIF3M	3.3797	-0.000863614	0.0914016	0.968799	0.999988
BCLAF1	3.84454	-0.00152728	0.0911367	0.948284	0.999573
DNAJA1	3.02468	0.0261341	0.0966938	0.258243	0.999573
EMC1	4.44987	-0.0137189	0.0917603	0.601177	0.999573
MRC2	2.67804	-0.0571393	0.117922	0.0232907	0.931873
KDELR1	3.82822	-0.0353016	0.0998958	0.180844	0.999573
CBWD2	6.35195	0.0150592	0.0911333	0.601093	0.999573
SULF2	3.60473	-0.746674	0.42637	0.00190779	0.30704
PDE4D	5.53856	0.0108701	0.0909782	0.688374	0.999573
RAB18	4.09647	0.00286345	0.0915389	0.900231	0.999573
DGCR6L	3.60146	0.0174688	0.0933149	0.474734	0.999573
ARL6IP5	2.11358	0.0202469	0.095339	0.318559	0.999573
NDUFV1	2.86443	0.0134237	0.0932913	0.524715	0.999573
HSPA4	2.61721	0.0264575	0.0970977	0.234081	0.999573
KIAA1549	4.09286	0.0176738	0.0933026	0.475273	0.999573
CTDSP2	3.84063	-0.0123716	0.0920862	0.616139	0.999573
EGLN3	2.98006	0.0198649	0.0946676	0.371951	0.999573
HECTD1	3.36366	0.0313225	0.0985328	0.205088	0.999573
LAMA4	4.4421	-0.0337001	0.0993484	0.191467	0.999573
BBLN	3.21779	-0.030093	0.0984138	0.191104	0.999573
WDR5	5.22892	-0.00945365	0.091598	0.700437	0.999573
SLC39A3	6.63403	-0.00914546	0.0896927	0.758789	0.999573
RBBP4	3.48047	0.0316743	0.0985411	0.209808	0.999573
NPAP1L	5.86289	0.0215952	0.0929747	0.450502	0.999573
PSMB2	2.6873	0.0192435	0.094707	0.368349	0.999573
DYRK2	3.62613	0.03097	0.0981264	0.221082	0.999573
GLG1	3.64977	-0.0230421	0.0948958	0.3519	0.999573
ACTN1	4.0676	0.0266221	0.0973576	0.211476	0.999573
ATP6V1G1	2.48121	0.0134959	0.0936601	0.493129	0.999573
HP1BP3	4.61273	-0.00415327	0.0903497	0.874482	0.999573
IL17B	2.91888	0.0480108	0.109805	0.0475918	0.999573
AZIN1	3.11857	-0.0258486	0.0963109	0.275887	0.999573
FXR1	3.04707	-0.0150057	0.0932788	0.5045	0.999573
GDI2	3.43422	-0.0176394	0.0934474	0.463601	0.999573
PKD1	6.72061	-0.565245	0.310828	0.00188435	0.30704
LDHAL6A	4.37148	0.0316184	0.0978208	0.242274	0.999573
TIAL1	4.29291	0.0343849	0.0994436	0.195099	0.999573
KHDRBS1	3.85719	0.0101125	0.0918856	0.677448	0.999573
STK19	4.94521	-0.0100684	0.0910093	0.703588	0.999573
ERGIC1	3.1319	0.0184971	0.0940501	0.422026	0.999573
RNH1	3.51676	-0.0128656	0.0923499	0.589829	0.999573
LPAR2	7.05174	-0.0157054	0.0916938	0.569083	0.999573
CSNK1A1	3.59364	0.0292898	0.097529	0.234251	0.999573
ITGA6	2.75838	0.0118146	0.0933375	0.550508	0.999573
WNT9A	5.01391	0.0295369	0.0963723	0.291858	0.999573
EXOC7	5.32805	-0.00199703	0.0898657	0.941475	0.999573
HSPB7	1.829	0.0033708	0.0928907	0.844402	0.999573
TP53BP2	3.36601	0.0261595	0.0966629	0.259185	0.999573
AMOTL1	3.18459	0.00177478	0.0913838	0.939768	0.999573
S100A4	2.15502	-0.0413214	0.105912	0.0416338	0.985375
NRDC	2.93233	0.01479	0.0932194	0.51136	0.999573
PACSIN3	3.12311	0.00959689	0.0925023	0.657602	0.999573
SETD5	4.87886	0.00819837	0.09099	0.752788	0.999573
UNC13D	2.02986	-0.00972917	0.0932926	0.595105	0.999573
MXRA8	4.36713	-0.0469035	0.107266	0.0893859	0.999573
MIDN	4.53331	0.0158331	0.092053	0.31794	0.999573
MYL12B	3.75823	-0.00383581	0.0911761	0.873843	0.999573
SEPTIN8	3.78407	0.0259989	0.0958153	0.308648	0.999573
GOLGA3	4.28891	-0.0190231	0.0930542	0.469819	0.999573
IK	3.24066	0.0155134	0.0933315	0.492346	0.999573
CCNL2	7.51124	-0.0341671	0.0972652	0.26752	0.999573
AKT1	2.93202	0.0205573	0.0947827	0.363967	0.999573
ZFP37	4.19281	0.0217679	0.0941908	0.397164	0.999573
ANKRD11	4.59683	0.00612413	0.0909816	0.809378	0.999573
STRBP	5.30038	0.0347174	0.0985104	0.227822	0.999573
SLC3A2	4.28729	0.00835249	0.0911182	0.746099	0.999573
STAT3	3.03736	-0.0155916	0.0937328	0.459474	0.999573
IGDCC4	4.43635	0.00609798	0.0909614	0.806009	0.999573
EIF5	3.30523	0.0182089	0.0942115	0.409384	0.999573
ADGRL2	4.16603	-0.000287035	0.0907199	0.989163	0.999988
IMPDH2	3.63143	-0.0150508	0.0928491	0.528237	0.999573
FHOD3	3.33299	-0.0382621	0.10283	0.102655	0.999573
COX17	2.90769	-0.00955487	0.0924156	0.659935	0.999573
APOBEC2	2.02638	0.0118321	0.093631	0.519918	0.999573
SCRN1	3.77228	8.23323e-05	0.0912427	0.998078	0.999988
SDF4	3.41524	-0.00600191	0.0916004	0.795314	0.999573
PPIB	4.06547	-0.0105255	0.0916022	0.674574	0.999573
ZKSCAN5	5.00441	0.00562636	0.0902998	0.835381	0.999573
OGA	5.04955	0.00797994	0.0906457	0.76655	0.999573
AP2B1	2.96911	-0.00450755	0.09176	0.840739	0.999573
CYGB	1.99702	-0.0349615	0.102037	0.0737463	0.999573
MEX3A	4.01095	0.0535751	0.112341	0.0686269	0.999573
PRRG3	6.16223	0.0207763	0.0921206	0.487117	0.999573
FOXO3	3.20572	0.0190275	0.0938786	0.43111	0.999573
PRKCSH	3.40021	-0.00807626	0.09184	0.726418	0.999573
IREB2	3.21254	-0.00889834	0.0920334	0.697296	0.999573
UBXN6	2.29098	0.0123279	0.0933417	0.541211	0.999573
POM121C	5.54647	0.00281784	0.0898276	0.92294	0.999573
JAM3	3.00685	0.0495502	0.111197	0.0411492	0.985375
PDCD5	2.96058	-0.00705552	0.0921461	0.74514	0.999573
PBXIP1	4.16769	0.028293	0.0970453	0.255901	0.999573
SEC24D	2.71333	0.0284181	0.0980942	0.189785	0.999573
RAB21	2.85901	-0.00788133	0.0924096	0.704262	0.999573
ANXA11	3.01583	0.0127035	0.0927529	0.574665	0.999573
HNRNPM	4.08445	0.0068824	0.0915029	0.773905	0.999573
RTRAF	2.21505	0.0207792	0.0955041	0.304567	0.999573
SORBS2	5.14196	0.00415736	0.0908274	0.870625	0.999573
CKMT2	1.79675	-0.00732065	0.0932752	0.662534	0.999573
SEC14L1	3.21936	0.00852624	0.0921692	0.70171	0.999573
BCAR1	3.32002	1.74671e-06	0.0915678	0.999245	0.999988
EXTL3	3.48709	-0.0151826	0.0929368	0.522566	0.999573
MYO10	2.70766	0.0175465	0.0941172	0.425833	0.999573
C1QBP	2.53262	0.0120176	0.0932434	0.554195	0.999573
WNT10A	5.64446	0.0298254	0.0962297	0.298044	0.999573
MBNL2	2.483	-0.00255041	0.0922055	0.898657	0.999573
CYB5R3	2.99437	0.030538	0.0990459	0.1621	0.999573
ZNF568	2.76489	-0.00917457	0.0924253	0.671218	0.999573
CDKN1C	4.05958	0.039604	0.102849	0.128932	0.999573
TIMP3	3.32548	0.00246034	0.0915073	0.9154	0.999573
SAE1	3.57854	0.023192	0.0952507	0.332757	0.999573
AHCY	3.16403	0.0288491	0.0978512	0.212045	0.999573
PPP6R1	3.62155	-0.0247809	0.0958598	0.294764	0.999573
SQSTM1	3.5069	-0.0290723	0.0973568	0.240214	0.999573
CHMP3	4.38597	0.015679	0.0924463	0.543464	0.999573
TNKS1BP1	4.44716	0.0483803	0.10797	0.0948435	0.999573
ETFA	3.17048	-0.00249761	0.0917021	0.9086	0.999573
ANK2	2.87995	0.00796341	0.0924715	0.700787	0.999573
RANBP2	6.15205	-0.110766	0.196854	0.015385	0.830892
PLPP7	4.96693	0.0104123	0.0912127	0.691734	0.999573
LMCD1	3.00693	0.0179801	0.0939911	0.428709	0.999573
GGTLC1	2.69493	0.0108615	0.0928407	0.60568	0.999573
CTDNEP1	2.72207	-0.0299222	0.0985117	0.184735	0.999573
MDH2	2.57027	-0.0172771	0.0942238	0.41216	0.999573
RHEB	3.80984	0.0285079	0.0968668	0.264869	0.999573
REEP5	2.40037	0.00210724	0.0921998	0.918679	0.999573
ZMIZ1	3.82025	-0.0282193	0.0968714	0.256267	0.999573
LMAN1	2.56786	0.00284647	0.0922053	0.888111	0.999573
TMEM250	6.17911	0.0176999	0.0920879	0.529857	0.999573
PHLDA3	2.73576	-0.0135873	0.0931884	0.531923	0.999573
AKAP6	2.8518	-0.00938224	0.0924628	0.66306	0.999573
CTNND1	4.01273	0.0348238	0.0999704	0.17684	0.999573
NOTCH2	4.48824	0.00585916	0.0905948	0.819496	0.999573
SDHC	3.16818	0.0107819	0.0924412	0.631831	0.999573
SKIL	3.85804	-0.0196608	0.0936735	0.46575	0.999573
PCGF3	4.30256	0.0162551	0.0925852	0.525716	0.999573
TMBIM6	3.54771	-0.00907942	0.0919771	0.694065	0.999573
STMN3	3.00963	0.000632662	0.0918081	0.978089	0.999988
NACC1	3.36496	-0.0206357	0.0943156	0.393109	0.999573
CPLX2	4.75858	0.0269945	0.0950978	0.342662	0.999573
PNRC1	3.56602	-0.000734954	0.0914849	0.973226	0.999988
CARM1	3.409	0.00377165	0.0914612	0.870893	0.999573
PRDM5	6.79851	0.000928758	0.0895421	0.97492	0.999988
ARF4	3.191	0.00179087	0.091517	0.93744	0.999573
C6orf62	2.82275	0.018255	0.0941802	0.413069	0.999573
SLC25A6	3.55265	0.00570168	0.0916161	0.8074	0.999573
MAVS	3.53919	-0.0164749	0.0930063	0.501236	0.999573
CAV1	2.48328	0.00810377	0.0928564	0.67563	0.999573
SERPINB6	3.87914	-0.0356479	0.100302	0.171639	0.999573
AGPAT1	3.90579	-0.00655113	0.0909805	0.796452	0.999573
RAB5B	2.99934	0.0157183	0.0935076	0.479809	0.999573
ATF7IP	3.46457	0.0110454	0.0923555	0.625552	0.999573
MIDEAS	5.19052	-0.0193903	0.0922937	0.496219	0.999573
TXNIP	3.35963	0.00388692	0.0917067	0.862448	0.999573
UQCRQ	2.65506	0.0241019	0.0963182	0.264598	0.999573
TAGLN	3.72547	0.0303114	0.0985092	0.191318	0.999573
RAB12	2.35175	0.00701075	0.0926817	0.718521	0.999573
PCBP4	4.17178	0.0253634	0.0957902	0.304814	0.999573
CYC1	2.36888	-0.00176519	0.0923335	0.927144	0.999573
TMED9	2.57651	-0.0248399	0.0964818	0.257136	0.999573
PADI2	1.83878	-0.016174	0.0947857	0.351645	0.999573
PLEKHD1	3.92703	-0.0262725	0.0960063	0.29442	0.999573
PSMB3	2.45875	-0.021398	0.0956489	0.292136	0.999573
TUBB	4.09359	0.0272689	0.0967548	0.264132	0.999573
PPP2R1A	1.84521	0.00853224	0.0932115	0.636173	0.999573
TNFRSF10C	5.47095	0.000940209	0.0898434	0.975523	0.999988
MAP3K7CL	2.88363	0.00316752	0.0918751	0.883812	0.999573
ZNF428	2.96365	0.0227749	0.0954656	0.319162	0.999573
ATN1	4.14479	-0.120178	0.252362	0.0047823	0.493374
MRLN	2.73614	0.0222502	0.0957192	0.294642	0.999573
ZNF362	4.14014	0.0115022	0.0921221	0.629937	0.999573
MED19	5.20378	-0.00962329	0.0911117	0.715603	0.999573
UQCRB	2.16597	0.0175227	0.0946068	0.380321	0.999573
RBMXL1	5.46255	0.0450683	0.104883	0.132161	0.999573
FILIP1	4.37734	0.0585474	0.11705	0.050753	0.999573
PSMA1	2.53247	0.00979953	0.0926171	0.646913	0.999573
MARS1	4.54113	0.0172913	0.0927403	0.505699	0.999573
WIPI1	2.54531	0.00311853	0.0922023	0.877888	0.999573
STT3A	3.23497	0.0238093	0.095454	0.323584	0.999573
H1-7	5.22508	-0.013463	0.0912937	0.621219	0.999573
SMARCA4	3.87284	-0.00843672	0.0914321	0.733452	0.999573
POTEG	7.01108	-0.040389	0.10102	0.186839	0.999573
OS9	3.24533	0.0088081	0.0919451	0.704764	0.999573
EMILIN1	3.68728	0.0131775	0.0923936	0.586134	0.999573
ANK1	2.61298	0.00106729	0.0919358	0.960739	0.999988
SDC3	3.22446	-0.0415435	0.104242	0.103682	0.999573
ATP5PO	2.19625	0.0218588	0.0959999	0.267659	0.999573
MCU	3.45803	0.0247909	0.0965795	0.247548	0.999573
SH3PXD2A	3.75261	-0.0378209	0.102042	0.124638	0.999573
TBC1D1	3.79532	0.0125279	0.092157	0.617613	0.999573
SET	2.82227	0.00226763	0.0919392	0.914373	0.999573
UBE2E3	3.17838	-0.00864952	0.0921893	0.696104	0.999573
RABL6	3.30742	0.0249724	0.0962349	0.273754	0.999573
GNPTAB	3.3283	0.0168517	0.0934602	0.472684	0.999573
SELENOF	2.78	0.0110636	0.092965	0.59239	0.999573
DCK	3.24324	0.0150884	0.0931794	0.511214	0.999573
PLAT	3.04056	-0.014222	0.0930929	0.525034	0.999573
CLASP1	3.44495	0.0160695	0.0932173	0.49489	0.999573
MKNK2	2.97519	-0.00221366	0.0915453	0.921778	0.999573
NET1	3.64096	-0.0230265	0.0949041	0.352204	0.999573
RAB39A	5.82134	0.0799189	0.139153	0.0351478	0.979175
CREB3L2	3.71867	0.0259012	0.0959945	0.301098	0.999573
RPL11	3.00662	0.0652154	0.126164	0.0201736	0.913199
MYOD1	4.95833	0.06345	0.121331	0.0454335	0.999573
AGAP1	4.99814	0.0333028	0.0982684	0.235176	0.999573
EIF2S3	3.17801	0.0299168	0.0978816	0.225986	0.999573
THY1	2.969	-0.0180502	0.0940201	0.423633	0.999573
SLF2	5.88159	0.0198026	0.0928626	0.473152	0.999573
NDUFV3	3.25685	0.0208173	0.0948766	0.355184	0.999573
RAP1B	3.20548	-0.0234748	0.0954666	0.317325	0.999573
JUND	2.79474	0.0142507	0.0933233	0.514128	0.999573
PKDCC	5.67008	-0.00673209	0.0900833	0.809699	0.999573
TMEM119	3.11734	-0.819695	0.413686	0.00120803	0.222202
RSF1	3.49238	0.0164445	0.0931632	0.496123	0.999573
XBP1	2.66564	0.00286902	0.0921612	0.888077	0.999573
MDK	4.2752	0.0161535	0.0928232	0.515454	0.999573
NDRG2	1.71656	-0.00916738	0.0933619	0.60208	0.999573
TM9SF2	2.92723	0.0238285	0.0960654	0.279702	0.999573
DELE1	4.64448	0.00900974	0.0912147	0.721974	0.999573
MTURN	3.06277	-0.0316066	0.0990378	0.175386	0.999573
ACVR1	2.883	-0.0135391	0.093317	0.518131	0.999573
BANK1	4.35164	0.00216817	0.0908481	0.931364	0.999573
LASP1	4.41992	-0.0162213	0.0922367	0.532704	0.999573
NDST1	4.33791	0.0317883	0.0976968	0.250456	0.999573
PIGT	2.54715	-0.0101506	0.0929618	0.610201	0.999573
SNHG32	4.33205	0.0308202	0.0972047	0.262875	0.999573
PSMC5	3.39225	0.00113002	0.0917147	0.959541	0.999988
SEC61G	2.49081	-0.000470804	0.0921011	0.98062	0.999988
COPS6	2.71674	0.0227301	0.0958563	0.287086	0.999573
TCEA3	2.72636	0.0254079	0.0967808	0.241352	0.999573
CDK11A	2.76981	-0.0230105	0.0958106	0.292001	0.999573
SLC35E2A	4.29282	-0.0320114	0.0979816	0.232659	0.999573
TEX13B	4.66516	-0.0514525	0.111204	0.0600325	0.999573
CDC42BPB	4.15466	-0.00468219	0.0910107	0.85234	0.999573
CTSB	3.04693	-0.00433772	0.0917127	0.844931	0.999573
GJD4	3.67208	0.0043688	0.0911907	0.85672	0.999573
PEAK1	2.74553	0.0199766	0.0946753	0.374136	0.999573
EIF3D	3.12791	-0.00612403	0.0918195	0.789141	0.999573
DHRS1	3.60665	-0.010665	0.0920271	0.653757	0.999573
TOB1	3.0855	0.0202386	0.0946221	0.373494	0.999573
CBX6	4.13575	-0.0249678	0.0951685	0.336368	0.999573
SUB1	2.81767	-0.00128054	0.0919976	0.950544	0.999573
TIMM23B	3.51963	0.00228347	0.0914572	0.921493	0.999573
EFEMP2	3.73583	-0.0445588	0.105948	0.0938742	0.999573
TRIM8	3.26124	0.0237704	0.0959681	0.286251	0.999573
DCAF6	3.02317	0.0113872	0.0925972	0.609737	0.999573
SMARCC1	3.49261	-0.0100421	0.0923588	0.653842	0.999573
IPO7	2.87157	0.0306016	0.0987728	0.179965	0.999573
PSMD4	3.44269	0.0111798	0.0922463	0.633649	0.999573
EEF1A2	2.42028	-0.0188633	0.0950072	0.335321	0.999573
KLF5	3.56026	0.0365849	0.101492	0.135177	0.999573
IST1	3.77625	-0.0017823	0.0911042	0.939919	0.999573
CCDC86	5.66212	0.0402531	0.100919	0.192347	0.999573
OTUD4	3.45335	0.0178742	0.0934803	0.450441	0.999573
MXRA7	1.95132	0.0114087	0.0935755	0.532038	0.999573
PJA2	3.12145	0.0301988	0.0983395	0.19998	0.999573
ALG2	3.27308	-0.118909	0.261894	0.00225719	0.330248
NR2F2	3.78364	0.0228394	0.0944703	0.381681	0.999573
GATA2	5.11223	-0.00289273	0.0904001	0.911731	0.999573
CHCHD10	2.09476	-0.00282667	0.0925526	0.878274	0.999573
PAFAH1B1	3.96496	-0.00791301	0.0913466	0.74873	0.999573
SEPTIN4	3.26322	0.0464988	0.108746	0.0487626	0.999573
SRSF6	4.79981	0.0704416	0.128543	0.0388111	0.979175
TXLNB	3.20696	0.0133646	0.0930775	0.539881	0.999573
KIAA0100	4.09558	0.000951399	0.0907862	0.970893	0.999988
RBM5	4.78956	0.0637027	0.122311	0.0391838	0.979175
LSM4	3.20691	-0.0201793	0.0945162	0.388421	0.999573
ADAM9	2.80997	-0.000476936	0.0917098	0.980879	0.999988
ITGB1BP2	4.02199	0.0310757	0.0980242	0.228725	0.999573
ZCCHC24	3.30405	-0.0223945	0.0950086	0.348736	0.999573
TEAD1	3.38353	0.00524611	0.0920343	0.806595	0.999573
PLEKHO1	2.89283	0.033055	0.100063	0.148022	0.999573
TOX4	3.45661	0.0135	0.0928808	0.551022	0.999573
MACO1	3.39426	0.068629	0.129294	0.0228149	0.931873
EPN2	4.49014	0.0407561	0.103045	0.135761	0.999573
CTSZ	2.57485	-0.00892665	0.0924516	0.677063	0.999573
PRPF4B	4.63184	0.01846	0.0928321	0.492104	0.999573
REEP1	4.91848	0.0240864	0.0959683	0.284659	0.999573
UBAP2L	2.87744	0.0126992	0.0930462	0.567944	0.999573
LUC7L3	6.13815	0.0728119	0.129033	0.049014	0.999573
CCNY	2.84311	0.0168726	0.0940756	0.427102	0.999573
SLC25A11	2.69731	0.0152599	0.093572	0.481856	0.999573
FST	3.48024	0.00579491	0.0914069	0.80876	0.999573
VSIG10	5.157	0.0343914	0.0990808	0.208839	0.999573
PET117	3.87251	-0.00864809	0.0914449	0.72552	0.999573
S100A10	2.9087	-0.000366053	0.0919764	0.985193	0.999988
SLC12A4	5.52612	-0.00186526	0.0900525	0.944362	0.999573
RCN2	3.46404	-0.00984347	0.0920325	0.674142	0.999573
ADGRL1	2.74117	-0.0165485	0.0940246	0.431436	0.999573
ATP6V0E1	2.30936	0.0141538	0.0938143	0.471681	0.999573
MAPRE3	3.21305	-0.00482565	0.0921425	0.814869	0.999573
SNRPD3	3.70243	0.0378948	0.102356	0.120738	0.999573
SCAMP2	2.64852	0.0219234	0.0956086	0.302979	0.999573
PRPF8	2.79664	0.00494811	0.0919795	0.819305	0.999573
STX5	3.11847	0.00425666	0.0916958	0.851255	0.999573
SPANXA1	5.45033	0.020522	0.093127	0.457495	0.999573
LRP5	3.79039	0.0106933	0.0917576	0.666741	0.999573
KDM5C	2.88397	-0.00913974	0.0925565	0.664097	0.999573
MRPL20	4.71431	-0.0323258	0.0976453	0.251015	0.999573
ORMDL3	2.719	-0.0146321	0.0934877	0.492183	0.999573
BNIP3L	4.21325	0.0164719	0.0926587	0.53297	0.999573
HECTD4	3.39154	0.00128883	0.0916502	0.954674	0.999573
SIRT6	2.46715	0.0328917	0.100365	0.12831	0.999573
FBXO10	4.22578	0.0149912	0.092279	0.562166	0.999573
ZNF267	5.28127	-0.0150919	0.0917728	0.577981	0.999573
CUL3	2.62908	-0.0176649	0.0941346	0.419059	0.999573
MRPL55	3.30185	0.0116475	0.0922723	0.622539	0.999573
RGS7BP	4.11861	0.00544518	0.09113	0.827563	0.999573
COX7B	2.52971	0.00150727	0.0919339	0.943907	0.999573
FBN2	3.29498	-1.93853	0.391723	3.10979e-08	0.000125122
THBS1	2.56345	-0.022307	0.0958018	0.282968	0.999573
TRIM66	5.58812	0.0306655	0.0968871	0.16614	0.999573
ABITRAM	5.29228	-0.0128172	0.0909993	0.643963	0.999573
DNAJB6	3.61285	0.0314826	0.0986266	0.202011	0.999573
KIAA0754	4.9155	0.0272562	0.0957419	0.316187	0.999573
NSD2	4.84133	0.0121105	0.0915311	0.643505	0.999573
COX8A	2.13685	-0.00404851	0.0924255	0.835171	0.999573
PPME1	3.35393	0.0203541	0.0943096	0.395081	0.999573
ADAMTS2	2.65825	0.0265177	0.0975858	0.194604	0.999573
DMWD	6.24551	0.0217453	0.092699	0.549225	0.999573
PTCD3	5.42075	0.0223503	0.0934406	0.427756	0.999573
FLYWCH2	4.71103	0.00311418	0.0905609	0.903613	0.999573
SNU13	2.78955	-0.0121948	0.0930476	0.562217	0.999573
FAM114A1	3.03025	0.000909339	0.0917739	0.964747	0.999988
IRF2BP2	2.91046	-0.00763207	0.0922698	0.718955	0.999573
DGCR2	3.28757	-0.0152186	0.0931543	0.507735	0.999573
DNAJB11	2.68429	0.0132645	0.09364	0.494386	0.999573
USF2	2.95838	-0.0275404	0.0971488	0.238862	0.999573
HSPE1	3.9038	0.0306209	0.0980295	0.221497	0.999573
LDHC	2.25295	-0.00303279	0.0922957	0.878176	0.999573
AKIRIN2	3.16676	1.92191e-05	0.0916842	0.999303	0.999988
MAPK8IP3	3.32445	0.0177909	0.0940327	0.423708	0.999573
PKIA	2.32264	0.00525304	0.092488	0.787104	0.999573
CLPTM1L	2.6779	-0.00433964	0.0919655	0.840391	0.999573
HIF1A	3.02129	-0.0142671	0.0933984	0.500856	0.999573
PREPL	2.87649	0.0133022	0.0931121	0.539559	0.999573
SNTB1	3.0825	-0.0261697	0.0967472	0.249416	0.999573
UBE2V1	3.21673	0.0464922	0.108094	0.0660922	0.999573
HM13	3.21945	0.0237996	0.0959194	0.2899	0.999573
ARHGAP26	5.17021	-0.000444422	0.0901051	0.986147	0.999988
COPB1	2.83263	0.00603556	0.0920338	0.782941	0.999573
GRIN2A	2.64663	-0.0268076	0.0973486	0.218143	0.999573
ZC3H13	3.18021	-0.00214397	0.0918296	0.920014	0.999573
UBE2D3	3.59179	-0.000820966	0.0911202	0.972207	0.999988
MAP2K3	2.37739	-0.00168537	0.0924203	0.930232	0.999573
B4GALT1	2.42871	0.0274136	0.0977852	0.196702	0.999573
HNRNPA0	3.51631	0.0212452	0.0946655	0.368626	0.999573
GGNBP2	3.69792	-0.0281513	0.0967523	0.264423	0.999573
CACNG1	3.34031	0.0170428	0.0937306	0.450898	0.999573
SHC1	4.35182	-0.023129	0.0952556	0.325901	0.999573
FABP3	1.94113	0.0160554	0.0945238	0.375267	0.999573
AARS1	3.06227	-0.00913329	0.0923141	0.677646	0.999573
GTF3C6	2.46411	-0.00477375	0.0923804	0.814627	0.999573
ZNF638	4.28702	-0.00456823	0.0909255	0.854212	0.999573
SREBF2	3.31055	-0.0398608	0.103772	0.0924557	0.999573
FADS1	5.1916	-0.00682882	0.0903896	0.795146	0.999573
S100A11	2.80902	-0.0518863	0.112919	0.0362943	0.979175
ZFAND5	3.0412	-0.000779831	0.0918336	0.969824	0.999988
CMYA5	3.0744	0.0238402	0.0964604	0.246157	0.999573
ACLY	3.46456	0.0057904	0.0913764	0.810401	0.999573
SRCAP	3.68944	0.0156035	0.092943	0.518151	0.999573
C1orf105	2.18534	-0.00773818	0.0929677	0.674794	0.999573
PDLIM1	2.23526	-0.0338044	0.101134	0.123904	0.999573
SH3D21	5.38888	0.0217101	0.0932347	0.444199	0.999573
GOT1	2.43827	0.0060872	0.0923609	0.767769	0.999573
PLG	4.77371	-0.00163302	0.090464	0.942284	0.999573
PMP22	2.47851	0.0020062	0.0919543	0.925073	0.999573
SNRPD2	2.89949	-0.0450401	0.107433	0.0588929	0.999573
PEA15	3.47751	-0.0122538	0.0925118	0.59225	0.999573
JOSD2	2.87256	0.0229312	0.0959419	0.280817	0.999573
INTS6	3.4285	0.0013428	0.0911884	0.957101	0.999823
NDUFB8	2.93827	0.0136213	0.0933014	0.521994	0.999573
HNRNPAB	3.63712	-0.0202963	0.0940659	0.405345	0.999573
STRAP	2.52506	-0.0129344	0.0934818	0.5157	0.999573
TAOK1	3.14179	-0.00651936	0.0917902	0.773493	0.999573
CSNK1D	3.97568	0.0104915	0.0916684	0.673825	0.999573
SOX9	2.83322	-0.0189035	0.0943734	0.393088	0.999573
ELOB	2.09169	0.0164899	0.0945445	0.385277	0.999573
PAFAH1B2	3.49412	-0.00599531	0.0917591	0.789816	0.999573
WSB1	6.63923	-0.0225531	0.0929362	0.443044	0.999573
CDK4	3.32693	0.00666297	0.0916015	0.778111	0.999573
EIF1AX	2.90225	0.0126303	0.0930226	0.558404	0.999573
BRK1	3.90849	-0.0479434	0.108342	0.0759307	0.999573
NDUFB6	2.56874	-0.0357086	0.101734	0.104564	0.999573
HUWE1	2.69639	-0.0144856	0.093663	0.478111	0.999573
OLA1	3.24924	0.0479147	0.109093	0.0634126	0.999573
DUSP1	3.08519	0.0381721	0.102523	0.117708	0.999573
CDC42EP1	3.28914	-0.00275118	0.0916898	0.899117	0.999573
PAPOLA	3.23569	0.0169931	0.0935757	0.462053	0.999573
MLIP	4.88002	-0.00749637	0.0911828	0.764428	0.999573
ANXA1	2.59456	-0.0274803	0.0976361	0.205028	0.999573
SLIT3	2.20933	-0.0329585	0.10067	0.105953	0.999573
SF3B3	4.46257	0.00715671	0.0908317	0.786999	0.999573
SMARCAD1	3.49404	-0.00690671	0.0917213	0.778685	0.999573
EZR	2.56747	-0.0045421	0.092137	0.826454	0.999573
IRGQ	2.82101	0.0123146	0.0931433	0.555788	0.999573
LRRFIP2	4.22014	-0.0376984	0.101345	0.151939	0.999573
TSNAX	3.02857	-0.0207723	0.0949266	0.347531	0.999573
ALKBH5	2.35865	-0.00115062	0.092382	0.951545	0.999573
TARDBP	4.08449	0.0609764	0.120276	0.0358206	0.979175
PIGS	3.0684	-0.0112543	0.0925414	0.612658	0.999573
NDUFB9	2.43195	0.0100326	0.0930055	0.615392	0.999573
GSPT1	2.28024	0.0231455	0.0964334	0.243237	0.999573
PDGFRA	2.8511	0.0236901	0.0961414	0.271802	0.999573
PRPF38B	4.77652	0.058189	0.115732	0.0628048	0.999573
PSMD8	2.45401	0.0117805	0.0930942	0.570012	0.999573
SNRPN	2.42402	0.00642245	0.092512	0.753931	0.999573
ECM2	2.61412	0.0347601	0.101234	0.115839	0.999573
PTGES3	3.26281	-0.0159987	0.0933836	0.481953	0.999573
FZD4	3.6061	-0.00729823	0.0916297	0.756658	0.999573
SULT1A4	5.45152	-0.00325511	0.0899016	0.905759	0.999573
WDR6	3.98559	-6.64688e-05	0.0911019	0.999307	0.999988
CD59	3.04729	-0.0116175	0.0927169	0.59707	0.999573
RGMA	4.50742	0.0242154	0.094827	0.35866	0.999573
SRP9	3.39976	0.00178364	0.0917154	0.938271	0.999573
SH3YL1	4.9895	0.0160264	0.091958	0.558751	0.999573
YAP1	3.60077	-0.00744713	0.0915579	0.752795	0.999573
PAIP2	2.95716	0.00378164	0.0918377	0.859987	0.999573
COBL	2.18111	0.0135551	0.0937587	0.483562	0.999573
PPM1G	3.22405	0.00907773	0.0922531	0.682567	0.999573
LTBP1	2.58844	0.00662652	0.0922752	0.754846	0.999573
KCNMB4	4.23451	0.0245701	0.0952715	0.332725	0.999573
PCDH11X	2.66541	0.0171894	0.0941531	0.420893	0.999573
PTK2	3.61498	-0.0581192	0.117486	0.0372874	0.979175
EOMES	6.05346	0.00115128	0.0894983	0.968726	0.999988
PFKL	3.55876	0.0281963	0.0970864	0.25282	0.999573
UTP11	3.0737	0.0432937	0.105773	0.0835259	0.999573
GABARAPL1	2.37584	0.00851228	0.0927852	0.669142	0.999573
KHSRP	3.74459	-0.0230832	0.0949978	0.3448	0.999573
MCRIP1	3.04434	-0.0193583	0.0944985	0.381506	0.999573
SYTL5	5.47826	0.096433	0.17361	0.0124588	0.771197
SMDT1	2.69063	0.00292303	0.0919374	0.890091	0.999573
SPAG9	2.74137	-0.0176438	0.0941318	0.415059	0.999573
BCL9L	2.87058	0.00348877	0.0917606	0.875175	0.999573
COX7A2	2.75524	-0.0180801	0.0942345	0.406467	0.999573
ZRANB2	4.90139	0.0358598	0.0993883	0.211125	0.999573
COL13A1	4.80659	-0.0246152	0.0942588	0.380864	0.999573
PGAM2	2.0623	-0.00523388	0.0927479	0.775359	0.999573
PPDPF	2.58039	-0.0169454	0.0940764	0.425325	0.999573
FGFR1	3.61147	0.02713	0.0968815	0.252989	0.999573
ADRM1	2.49268	0.00479273	0.0924549	0.804823	0.999573
EHD1	2.59622	-0.0189529	0.0946181	0.371965	0.999573
PTPN21	2.77494	-0.0366495	0.102215	0.0986323	0.999573
RDX	2.3954	-0.0206695	0.0953441	0.311782	0.999573
IGFBP2	4.78694	0.0235086	0.0940411	0.397253	0.999573
DCAF1	4.55144	-0.0180999	0.0930343	0.480196	0.999573
NFYC	3.31311	-0.0224934	0.0951263	0.336793	0.999573
UBE2G1	2.87195	-0.0135541	0.0930633	0.567049	0.999573
SS18	4.05979	0.0151409	0.0926924	0.536966	0.999573
MARK4	3.30092	0.0071898	0.0917043	0.75915	0.999573
TRA2A	3.92176	0.0192988	0.0935032	0.452541	0.999573
SDK2	4.51814	0.00248715	0.0907568	0.92213	0.999573
PALMD	2.70956	0.0139759	0.0933212	0.515684	0.999573
RUNX1	3.77449	-0.0713393	0.133598	0.0142487	0.812903
CNOT11	2.87023	0.0148784	0.0935878	0.483801	0.999573
MRPL33	3.54818	-0.00582915	0.0915604	0.810651	0.999573
ZBTB18	3.02961	0.00956847	0.0925216	0.655173	0.999573
RERE	4.30461	0.0292438	0.0970141	0.260668	0.999573
TMEM38A	2.37392	0.00820948	0.0929013	0.667948	0.999573
PPP1CC	3.12198	0.00318908	0.0917539	0.885428	0.999573
SLC36A1	5.0744	0.00826599	0.0912732	0.741339	0.999573
FUBP3	4.23371	0.00896814	0.09136	0.721997	0.999573
AGAP3	3.91373	0.0194997	0.0939052	0.423128	0.999573
GPKOW	2.63589	-0.0165582	0.0941558	0.418018	0.999573
PLPP4	5.78119	0.00971259	0.0909066	0.715638	0.999573
EFR3B	3.89357	0.0193277	0.0935193	0.447263	0.999573
MAGEA8	4.86751	-0.0139312	0.0916483	0.600208	0.999573
ELL	6.01335	0.0274679	0.095591	0.32117	0.999573
AXL	1.9504	0.00954502	0.0932707	0.603206	0.999573
TMEM9	4.18256	-0.00913149	0.0912932	0.721728	0.999573
EIF2S2	2.42475	0.00253689	0.0921985	0.901877	0.999573
ARFGAP1	6.42612	-0.0174962	0.0911469	0.560275	0.999573
NRK	3.35242	0.0155822	0.0930253	0.513052	0.999573
YTHDC1	3.63631	0.0397316	0.102772	0.131155	0.999573
SMARCA5	2.71322	0.0116491	0.0929457	0.581018	0.999573
PRDX5	2.44719	0.00182521	0.0920633	0.930155	0.999573
AKR1E2	5.1099	0.0152492	0.09156	0.584806	0.999573
ACSL4	3.18014	-0.00423849	0.0913613	0.857328	0.999573
DDX4	2.0708	-0.00701825	0.0927114	0.716891	0.999573
GOLPH3	2.94167	-0.00449757	0.0921817	0.826158	0.999573
RANBP1	4.17628	0.00660775	0.0910564	0.791927	0.999573
CD164	3.11489	-0.00921462	0.0922554	0.676254	0.999573
PGD	3.6014	0.0238436	0.0954882	0.317731	0.999573
NARS1	3.00035	0.0303549	0.0985229	0.193435	0.999573
LTBP3	3.58202	0.00269361	0.0914941	0.906283	0.999573
NAP1L4	2.95091	0.0257802	0.0969529	0.233675	0.999573
TMEM263	2.98674	-0.0080633	0.0921609	0.7125	0.999573
LIMA1	4.55164	-0.00884138	0.0917261	0.709243	0.999573
HOMER2	2.98649	-0.0195136	0.0946321	0.371853	0.999573
UBE2I	3.33382	0.00431743	0.0917434	0.846162	0.999573
SERPINE1	2.84847	-0.0286747	0.0981458	0.185183	0.999573
EFTUD2	2.82349	-0.00206528	0.0918229	0.923758	0.999573
RAP2B	2.63775	0.00287291	0.0919714	0.900681	0.999573
CPTP	5.13534	0.00312502	0.0902394	0.909314	0.999573
LDB1	3.96958	-0.0194359	0.0935181	0.441936	0.999573
ENDOD1	2.84847	0.0251697	0.0963501	0.272763	0.999573
FAM90A1	3.04901	-0.0284904	0.0975056	0.227184	0.999573
FEM1A	2.14125	0.0176666	0.0948748	0.350154	0.999573
GOLGA4	3.72164	0.00599003	0.0915768	0.797789	0.999573
SCARB2	2.43182	0.00101634	0.0920379	0.962466	0.999988
PSMD14	2.8579	0.0016789	0.091896	0.934882	0.999573
WNT10B	3.42148	0.0246002	0.0959048	0.299772	0.999573
APMAP	3.74978	0.0178979	0.093257	0.474954	0.999573
AK2	3.4598	0.00499694	0.0915004	0.833231	0.999573
SPIN2B	4.99979	-0.00999415	0.0909022	0.708266	0.999573
RASA3	3.24517	-0.0299175	0.0979143	0.220333	0.999573
SNRPB2	2.61352	0.013156	0.0932589	0.532612	0.999573
SEM1	2.17821	-0.0434499	0.107382	0.0339411	0.979175
PDCD6	4.83979	-0.00356942	0.090624	0.888685	0.999573
IQSEC1	3.59166	-0.0334331	0.0993813	0.184329	0.999573
FAM118A	4.47267	0.0179919	0.0925492	0.508531	0.999573
ZC3H4	3.58901	-0.0134874	0.0924902	0.572108	0.999573
PAMR1	2.66977	0.0140961	0.0935719	0.493503	0.999573
PEBP1	2.77755	-0.0236052	0.0960106	0.281014	0.999573
SMAD1	2.70814	-0.0116816	0.0928272	0.59716	0.999573
MICOS10	2.78147	-0.00590196	0.0920902	0.782838	0.999573
ZNF333	2.92346	0.00411049	0.0920091	0.844966	0.999573
FAM120A	2.73818	0.00486707	0.0918886	0.824864	0.999573
CTBP1	3.04725	0.0243052	0.0959561	0.290641	0.999573
SEL1L	2.57833	-0.00867357	0.092814	0.659594	0.999573
DCAF8	3.67607	0.00972077	0.0917381	0.689876	0.999573
RHBDF1	4.63938	0.00205604	0.0911915	0.930243	0.999573
RAB35	2.72403	-0.00337814	0.0919794	0.87311	0.999573
SSB	3.04014	0.0359079	0.101545	0.120332	0.999573
KIAA2013	3.11108	-0.0100644	0.0923706	0.64733	0.999573
VDAC3	2.43106	0.0134738	0.0936977	0.488277	0.999573
FIBIN	3.50939	-0.0589774	0.11979	0.0204705	0.915146
BCAP31	2.32394	0.00883892	0.0928483	0.653945	0.999573
BTG1	2.76105	-0.00562193	0.0921923	0.787418	0.999573
WSB2	2.68865	-0.0226864	0.0960106	0.267797	0.999573
GABARAPL2	2.34256	-0.000130692	0.0922576	0.998775	0.999988
ATG9A	2.82121	0.00411836	0.0919178	0.849741	0.999573
NHSL1	3.75834	0.0480299	0.10872	0.0730491	0.999573
NR1H2	4.62866	-0.000506781	0.0903922	0.982911	0.999988
CKAP4	3.24555	-0.0311141	0.0985492	0.197792	0.999573
ATP2C1	3.54573	-0.0298325	0.0978059	0.220856	0.999573
PFN2	3.78549	-0.00846293	0.0918768	0.714423	0.999573
GGA3	3.05447	-0.0082044	0.0919048	0.721628	0.999573
PSMD13	2.43162	-0.0154576	0.0939168	0.448456	0.999573
FAM171A1	3.09533	0.00575501	0.0918897	0.796831	0.999573
TMCO1	3.03833	0.0164383	0.0937046	0.457863	0.999573
RGS3	5.23703	0.00246664	0.0903367	0.926795	0.999573
FXYD6	2.92052	-0.0199236	0.0948113	0.357002	0.999573
HSPB6	1.70059	-0.0159437	0.0946706	0.368852	0.999573
ADGRA3	3.72531	0.0165919	0.0928708	0.5105	0.999573
FHIP1B	3.1786	-0.00643877	0.091886	0.774207	0.999573
LZTS2	4.91644	0.0187143	0.0926922	0.494126	0.999573
FBN1	2.88295	0.0175698	0.093815	0.444903	0.999573
FOSL2	3.25853	0.0325333	0.0992588	0.185427	0.999573
B4GALT5	2.5108	0.0196206	0.0948886	0.355051	0.999573
CDK3	5.06727	-0.00585466	0.0904928	0.81978	0.999573
SSR1	3.22604	0.0175447	0.0937259	0.45008	0.999573
SRP14	2.7716	0.0132091	0.0937101	0.488887	0.999573
REX1BD	3.90343	-0.0349035	0.100109	0.167032	0.999573
RBM3	3.588	0.022324	0.0947799	0.364422	0.999573
THRA	2.49777	0.0195494	0.0951284	0.330801	0.999573
ZNF703	3.02771	-0.0442714	0.106536	0.0732153	0.999573
VAPA	2.60737	0.00116808	0.0918988	0.955137	0.999738
SPPL3	2.73299	0.00388527	0.0918506	0.858541	0.999573
GLUL	2.10489	0.00504583	0.0925327	0.794516	0.999573
ZFAND6	2.48025	-0.0113301	0.0930436	0.579176	0.999573
LRIG1	3.666	0.016431	0.0929658	0.508153	0.999573
FXR2	2.4582	-0.00761004	0.0925585	0.707474	0.999573
SEC11A	3.53351	0.0190496	0.0943006	0.400171	0.999573
STT3B	2.58025	0.00304999	0.091921	0.887905	0.999573
TNIK	6.1533	0.0446846	0.104601	0.133103	0.999573
POMP	2.77435	-0.00691294	0.0923256	0.741307	0.999573
AHSA1	2.38055	0.00488118	0.0924048	0.852013	0.999573
ALG12	2.73401	0.0111635	0.0929771	0.589943	0.999573
ADSL	3.10129	0.0233964	0.0956672	0.310044	0.999573
LRRC17	2.69694	-0.0381927	0.103116	0.0883813	0.999573
CD27	4.59402	0.0545261	0.113154	0.0642543	0.999573
RPL7L1	3.09151	-0.00950965	0.0921188	0.674222	0.999573
AGAP9	5.66442	0.0138001	0.0913111	0.613178	0.999573
SIRT2	2.6906	-0.0393228	0.103669	0.0883044	0.999573
MTMR10	2.71329	0.0102583	0.0926517	0.631928	0.999573
CAMK2D	3.12635	0.0648992	0.125803	0.0204684	0.915146
NDUFB7	3.88334	-0.0350514	0.0996349	0.190735	0.999573
PRXL2A	2.63627	0.0237556	0.0962891	0.263579	0.999573
TERF2IP	3.28418	0.0187614	0.0939279	0.429379	0.999573
TRIM61	3.33416	0.00401727	0.0916175	0.860517	0.999573
RANBP9	2.37779	0.010819	0.0931472	0.584037	0.999573
MCM5	3.91737	0.0055368	0.0915264	0.813855	0.999573
KIAA1143	2.4341	0.00463235	0.0923801	0.819972	0.999573
SSR3	2.57255	-0.00632887	0.0923827	0.755492	0.999573
WBP4	4.45038	-0.0169547	0.09275	0.507795	0.999573
SUGP2	4.83014	0.0253383	0.0950122	0.348168	0.999573
NDUFS6	2.71292	0.0251234	0.0967673	0.240427	0.999573
RBM42	2.70466	-0.00030565	0.0919636	0.990062	0.999988
EBNA1BP2	2.76239	-0.00826693	0.0924751	0.692846	0.999573
ERH	2.7205	0.0268188	0.0971025	0.242316	0.999573
NDUFB2	3.0036	0.0195597	0.0945146	0.385813	0.999573
VAPB	2.83776	-0.00917295	0.0923966	0.671084	0.999573
AKR1A1	3.83829	0.00697673	0.0911742	0.780382	0.999573
UBL3	4.38775	-0.00226755	0.090934	0.927966	0.999573
AP2A2	3.29159	0.0136227	0.0928334	0.556645	0.999573
MYH7B	4.83848	0.0300142	0.09908	0.148462	0.999573
RBM38	2.50318	0.000963991	0.091899	0.96424	0.999988
NME1	2.73375	0.00259642	0.0919658	0.903146	0.999573
ZNF516	2.99853	-0.0149219	0.093134	0.513033	0.999573
CDR2	3.5287	0.0115586	0.0921174	0.631059	0.999573
CHMP1A	3.136	0.0353066	0.100811	0.148568	0.999573
ATAD1	2.68841	-0.0117252	0.092966	0.576531	0.999573
HDAC2	2.66485	0.0125676	0.0928993	0.57048	0.999573
TENM3	3.28052	-0.0234072	0.0955619	0.309734	0.999573
TYK2	4.44283	0.0480098	0.107914	0.0911376	0.999573
PGM5	4.40103	0.0321986	0.0988655	0.198317	0.999573
SMC1A	2.85868	0.0191296	0.0946051	0.374734	0.999573
MAGT1	2.3354	-0.0117057	0.0932437	0.558113	0.999573
ASAH1	2.38972	-0.00413327	0.0923956	0.833112	0.999573
ZNF521	2.72826	0.00128205	0.0918243	0.95319	0.999573
PITX1	3.25106	-0.0251339	0.0962684	0.271662	0.999573
TTC31	3.34283	0.011868	0.092608	0.598303	0.999573
ARPC1A	2.6254	0.0193564	0.094694	0.368862	0.999573
ABL1	3.20801	0.0097483	0.092343	0.658703	0.999573
COL27A1	4.13577	-0.001762	0.0910221	0.941253	0.999573
FAM3A	4.33513	-0.0181766	0.0932962	0.462978	0.999573
MYL5	2.35094	-0.0175071	0.09459	0.377423	0.999573
CREB3L1	2.30287	-0.0152354	0.0939892	0.441419	0.999573
GJC3	3.5272	-0.009306	0.0922822	0.672514	0.999573
SRRM3	4.70344	0.00942611	0.0908836	0.724219	0.999573
NF2	3.21601	-0.0243339	0.0958423	0.298577	0.999573
MED13L	2.9098	0.0305392	0.098667	0.186449	0.999573
EEF1B2	2.87014	0.0393091	0.103819	0.0835838	0.999573
EIF4A3	3.15571	-0.00646825	0.0918005	0.772001	0.999573
STX4	3.3104	0.0235699	0.0952677	0.337642	0.999573
METAP2	3.07954	-0.0180576	0.0941884	0.411236	0.999573
INF2	3.38672	-0.0211921	0.0946819	0.367357	0.999573
DKK3	2.45327	-0.00526379	0.09247	0.788253	0.999573
DDX3X	3.24322	0.0117854	0.0925715	0.602066	0.999573
TUSC3	2.67624	0.00206867	0.0919629	0.924402	0.999573
ZNF548	3.8267	0.00679279	0.091354	0.781554	0.999573
TRMT112	2.37752	0.0229559	0.0962493	0.256988	0.999573
NDEL1	3.97625	-0.00565628	0.091292	0.813876	0.999573
SMARCC2	3.79797	0.0212147	0.0948658	0.357403	0.999573
GATD3A	2.49764	-0.00256597	0.0921354	0.899663	0.999573
INPP4B	3.31052	0.0151732	0.0931308	0.514196	0.999573
KIF2A	3.81724	0.0363331	0.101023	0.151373	0.999573
SCT	2.65561	-0.00801564	0.0926868	0.68734	0.999573
IMMT	3.0846	0.028593	0.0977646	0.214344	0.999573
OLFML2B	3.68346	-0.00264981	0.0912904	0.909473	0.999573
YWHAQ	2.9598	0.00146556	0.0917234	0.947814	0.999573
NR4A1	2.47988	0.0283329	0.09837	0.16783	0.999573
ARF5	2.43036	-0.00206915	0.0924426	0.912117	0.999573
MUC21	4.83654	-0.0355702	0.0995051	0.196461	0.999573
ODC1	2.59592	-0.0111626	0.0928158	0.59925	0.999573
TXLNA	3.05229	0.0272426	0.0970119	0.246526	0.999573
MFN2	2.87303	0.0007548	0.0918427	0.974393	0.999988
IRF9	3.59422	0.0176852	0.0935648	0.455571	0.999573
TEAD2	4.90231	-0.0138475	0.0913398	0.612911	0.999573
PRR12	3.09144	-0.00584493	0.0916137	0.795711	0.999573
H1-2	3.41025	0.0282963	0.0977468	0.213059	0.999573
MSI2	2.61426	-0.008215	0.0928045	0.674445	0.999573
WDR26	2.82483	-0.00425019	0.0919211	0.843381	0.999573
NBR1	2.66925	-0.0217338	0.0954256	0.31453	0.999573
RCC1L	3.53528	0.0229178	0.0950851	0.345335	0.999573
PPP6C	2.47876	-0.00983137	0.0929055	0.630022	0.999573
KRTAP9-4	4.31048	0.00874287	0.0911205	0.736471	0.999573
SLC44A2	3.65801	0.0300771	0.0977398	0.234544	0.999573
ATG4B	4.23941	0.00183912	0.0908901	0.942982	0.999573
TFDP2	2.85085	0.0145343	0.093311	0.508005	0.999573
USP14	2.75008	0.00299336	0.0919858	0.887688	0.999573
CMA1	4.72036	0.011642	0.0912449	0.662543	0.999573
ZNF334	4.01947	0.00618192	0.0914417	0.795676	0.999573
ZNF146	4.24354	0.00939456	0.0910981	0.721336	0.999573
DHX15	4.50635	-0.00310896	0.0905413	0.903993	0.999573
NT5C2	2.98497	-0.0129369	0.0930343	0.550563	0.999573
TAGLN3	3.15937	0.00350257	0.0915107	0.87968	0.999573
FADS3	3.8182	0.00649495	0.0925556	0.741579	0.999573
MRPS34	2.76292	0.00562944	0.092098	0.792491	0.999573
TSR3	3.29334	-0.00452124	0.091648	0.840506	0.999573
ERBB3	3.86626	0.0376499	0.101478	0.152641	0.999573
UBE4B	2.74698	0.00286012	0.0919877	0.893439	0.999573
KAT7	3.99106	0.00657108	0.0911956	0.792569	0.999573
NICN1	4.40889	-0.0022692	0.0903974	0.928589	0.999573
NPTN	2.74294	-0.0156703	0.093649	0.469588	0.999573
RSRC2	3.20642	-0.00148995	0.0915332	0.946729	0.999573
GFPT1	2.66725	-0.018401	0.0945037	0.382987	0.999573
TMEM248	3.76432	-0.0270481	0.0962141	0.288254	0.999573
MTSS2	3.13976	0.0110762	0.0926001	0.616149	0.999573
RER1	2.96792	0.010167	0.0925021	0.643067	0.999573
ISCU	2.18125	-0.00299681	0.092386	0.877092	0.999573
C1orf43	2.41008	-0.00366172	0.0922058	0.856689	0.999573
TMEM214	3.73685	-0.00808355	0.0918087	0.727235	0.999573
TMED10	2.83933	-0.0177584	0.0941845	0.411526	0.999573
CAPN2	2.52052	-0.0122468	0.0932171	0.549922	0.999573
PSMD6	2.33319	-0.00768031	0.0927267	0.695074	0.999573
CCAR1	4.43369	0.00255853	0.0904446	0.921121	0.999573
SCX	2.56305	-1.33836	0.404535	3.77166e-05	0.0208943
YY1	3.33055	-0.00912794	0.0919597	0.694242	0.999573
LUC7L2	2.82389	-0.00297147	0.0919421	0.887789	0.999573
BMP1	4.29061	-0.0176448	0.0930031	0.4827	0.999573
IGF2BP2	4.43986	0.00543152	0.090752	0.833312	0.999573
TMED3	2.4631	0.0017528	0.0923326	0.928581	0.999573
RPS6KB2	3.44829	0.0301576	0.0978097	0.230491	0.999573
MRPS24	2.4317	-0.0162769	0.0941407	0.422333	0.999573
ACTR2	2.99938	0.00903971	0.092269	0.684688	0.999573
MICALL2	2.9804	0.0136397	0.093228	0.5257	0.999573
LRPAP1	2.64042	0.00210787	0.0919275	0.921348	0.999573
RPS27L	2.56462	0.0011762	0.0923261	0.952471	0.999573
ACAA2	2.20906	-0.00344042	0.0924254	0.858439	0.999573
COQ9	3.61917	-0.0148822	0.0927558	0.535233	0.999573
CRMP1	3.30058	-0.00242244	0.091372	0.917536	0.999573
VGLL3	3.46809	0.0208053	0.0952311	0.323351	0.999573
TCF25	3.82915	-0.0403985	0.103023	0.127592	0.999573
SLC6A8	2.90668	0.0162974	0.0937898	0.455241	0.999573
PLPP3	3.07476	0.019206	0.0947454	0.362832	0.999573
GLIS2	3.1495	-0.0409272	0.104011	0.101214	0.999573
RAB5C	2.48843	-0.0108568	0.0929549	0.596051	0.999573
CDC42EP3	3.01067	0.0220525	0.0954233	0.322197	0.999573
NDUFB3	2.18302	0.018266	0.0950275	0.335168	0.999573
ELOC	2.65231	0.0222243	0.0958433	0.285039	0.999573
FBRS	4.18922	0.0178068	0.0929766	0.490092	0.999573
UBE2K	3.67637	-0.0189626	0.0938775	0.424039	0.999573
RAF1	2.90716	0.00439233	0.0921448	0.834682	0.999573
SSBP3	2.38006	0.00725746	0.0924005	0.728111	0.999573
SETD3	2.4958	0.0157879	0.0941126	0.431161	0.999573
ACTR10	3.83731	-0.00900975	0.091461	0.714851	0.999573
AP2A1	2.60153	-0.0333942	0.10039	0.132896	0.999573
CLINT1	2.342	0.0275287	0.0979586	0.183917	0.999573
CDRT4	4.78593	0.0187085	0.0926702	0.490732	0.999573
LRTM1	2.30858	0.0467651	0.109398	0.0396218	0.979175
TRAM2	2.84603	0.0364481	0.101775	0.121074	0.999573
NEO1	2.31415	-0.0179252	0.0947817	0.357126	0.999573
SARS1	2.66111	-0.00426699	0.0923342	0.828914	0.999573
CNIH1	2.37659	0.015082	0.0939311	0.452406	0.999573
PUM1	3.97403	-0.00043895	0.090969	0.983987	0.999988
COQ10A	2.02563	-0.0270592	0.0982608	0.145241	0.999573
ATXN2	3.11356	0.0086224	0.0919671	0.710549	0.999573
MED12	3.06121	-0.00886264	0.0922233	0.690666	0.999573
HADHA	2.29133	-0.00667414	0.092714	0.729572	0.999573
TMEM109	2.78238	0.00985734	0.0925035	0.651188	0.999573
ZNF787	3.23504	-0.00703687	0.0918953	0.754967	0.999573
OLFML2A	3.7572	0.0452997	0.10639	0.0942482	0.999573
GSK3B	2.67725	0.046684	0.108936	0.0489012	0.999573
FH	2.0404	0.0141694	0.093924	0.462292	0.999573
ZNF721	4.64445	0.036754	0.100067	0.195977	0.999573
STRN4	3.11896	0.0134335	0.0928649	0.554328	0.999573
AFG3L2	2.46821	-0.0157765	0.0939238	0.444878	0.999573
OBSCN	4.25676	0.0441332	0.105104	0.113882	0.999573
TMEM165	3.09617	0.0128718	0.0931081	0.550135	0.999573
SNX3	2.28536	0.0149139	0.0940736	0.440131	0.999573
KDM2A	3.50487	-0.0127286	0.0923068	0.596155	0.999573
GSK3A	2.65371	-7.91645e-06	0.0920837	0.998818	0.999988
FTSJ3	3.36672	0.0213763	0.0946159	0.372107	0.999573
MZF1	3.01147	0.0159343	0.0935468	0.47626	0.999573
SGCA	3.12825	0.00140563	0.0916326	0.951722	0.999573
GNA11	2.72818	0.0173238	0.0942033	0.41509	0.999573
HCK	3.01007	-0.0128467	0.0929562	0.556127	0.999573
WTAP	3.23317	0.0152935	0.0934014	0.490178	0.999573
RHOBTB3	2.99263	-0.0140487	0.0932188	0.518048	0.999573
ZMIZ2	4.60196	0.00988458	0.0909553	0.71333	0.999573
SLC66A2	2.65502	-0.0308171	0.0991085	0.160773	0.999573
PLXNA1	2.87175	-0.0251033	0.0963387	0.26975	0.999573
SCD	2.33976	-0.0120146	0.093281	0.548551	0.999573
P3H2	2.52094	-0.00319597	0.0922097	0.87867	0.999573
TP53INP2	2.03121	0.00337995	0.0925657	0.85461	0.999573
ATP5PB	2.32178	-0.0264491	0.0977438	0.175662	0.999573
CDK15	5.01737	-0.00429825	0.090537	0.868286	0.999573
CAPN15	4.98308	0.00592583	0.0904605	0.825922	0.999573
GRK2	2.76753	-0.00962436	0.0926236	0.647574	0.999573
CLIP3	2.26673	-0.00385012	0.0923992	0.841771	0.999573
CCDC9	3.9907	-0.0163064	0.0934034	0.4754	0.999573
HSPD1	2.78011	0.0307728	0.0991667	0.158467	0.999573
ATP6AP2	2.76791	-0.00018505	0.091856	0.991908	0.999988
P3H1	2.92929	-0.0108335	0.0925664	0.601965	0.999573
GLUD1	2.62931	-0.00979059	0.0926657	0.634588	0.999573
SPEG	3.64728	0.049806	0.110727	0.0522627	0.999573
LMF2	3.93614	-0.00584165	0.0914952	0.80244	0.999573
AFAP1L1	2.75558	0.0123846	0.0931524	0.553523	0.999573
KPNA1	2.4551	0.0130373	0.0934852	0.515951	0.999573
PROSER3	3.49921	0.0162454	0.0928967	0.434588	0.999573
ZFP1	3.19347	-0.00391487	0.0915674	0.858117	0.999573
GOLGB1	3.27024	-0.00124797	0.0914753	0.955504	0.999823
EGFL7	4.71903	-0.0125967	0.0913904	0.636709	0.999573
CDK5RAP3	3.83767	0.0123155	0.0924992	0.597174	0.999573
DYNC1LI2	3.55091	-0.00321164	0.0913953	0.889621	0.999573
SRF	3.02446	0.017513	0.094	0.427909	0.999573
CDH2	2.98666	-0.0639734	0.125051	0.0166127	0.85148
BAGE5	4.7219	0.0476812	0.106849	0.113662	0.999573
MYOF	3.73256	0.00686763	0.091602	0.771933	0.999573
VCAN	3.07265	-0.0292262	0.0981475	0.194621	0.999573
SRRT	4.10285	0.010168	0.0915851	0.685653	0.999573
ABCD1	2.70534	-0.0115415	0.0929454	0.583125	0.999573
AKAP12	2.61338	-0.0205478	0.0949374	0.350528	0.999573
ADD1	3.10304	0.00408193	0.0918167	0.852749	0.999573
ARFGEF1	3.19608	-0.0213673	0.0949464	0.34957	0.999573
CSNK2A3	2.81633	-0.0310413	0.0989395	0.172995	0.999573
PDLIM5	3.76464	0.0192813	0.094095	0.415602	0.999573
CCDC110	4.95038	-0.0201636	0.0928633	0.465195	0.999573
ZNF706	2.82887	-0.0191313	0.0944605	0.385186	0.999573
TNK2	4.46458	0.0282073	0.0962582	0.296715	0.999573
RAB10	2.89783	-0.00783601	0.0922912	0.710896	0.999573
PRPSAP1	3.08349	0.0176917	0.0942243	0.408397	0.999573
ATP5MK	1.98403	-0.0027376	0.0925807	0.882626	0.999573
IRGC	3.49338	0.0309426	0.0983453	0.20897	0.999573
CAB39	3.13087	-0.00169142	0.0921675	0.931661	0.999573
CPSF7	3.53451	-0.00475405	0.0915816	0.836305	0.999573
SOX8	5.92056	-0.0163362	0.0927948	0.512418	0.999573
IDH3A	2.22229	0.0199607	0.0952918	0.32013	0.999573
CECR2	2.93668	0.0388198	0.103352	0.0939088	0.999573
HYDIN	3.14708	-0.00567267	0.091921	0.796528	0.999573
PLAGL1	3.77186	-0.00378813	0.091231	0.884675	0.999573
UFM1	3.16085	0.0235487	0.0957088	0.306296	0.999573
RXRG	2.70253	0.00259646	0.0920878	0.900262	0.999573
FAM234A	2.23332	-0.00481937	0.0924474	0.805216	0.999573
PDE4C	4.05173	-0.0195641	0.0936521	0.436979	0.999573
SUPT6H	2.4124	0.0213136	0.09557	0.301859	0.999573
CACNB1	3.37228	-0.0116374	0.0922361	0.622044	0.999573
DCHS1	3.52621	-0.0219185	0.0950699	0.336835	0.999573
TMEM258	2.06534	0.00813095	0.0928914	0.670741	0.999573
ORM2	3.35971	-0.0124981	0.0924345	0.594602	0.999573
GBF1	2.87564	-0.0032936	0.0920102	0.875869	0.999573
ADAR	3.35137	-0.0327026	0.09897	0.196892	0.999573
PPIAL4A	3.06771	0.00523469	0.0921609	0.802425	0.999573
RAB28	4.34032	0.0060803	0.0908871	0.812515	0.999573
PWWP3A	4.07533	-0.00992983	0.0917552	0.680397	0.999573
PHACTR3	2.04705	-0.0143337	0.0940448	0.445855	0.999573
TRAP1	2.36707	0.0177596	0.0945947	0.37992	0.999573
SEC23A	2.53276	-0.00415504	0.0923107	0.833276	0.999573
TEAD3	3.82682	0.0244701	0.0954041	0.327291	0.999573
NIPSNAP2	2.45527	-0.00362434	0.0922489	0.852091	0.999573
ARRB2	4.36187	0.0128721	0.0917789	0.618604	0.999573
EIF4E2	3.81842	-0.0275977	0.0964629	0.27762	0.999573
ZFC3H1	3.21259	-0.028588	0.0975106	0.227574	0.999573
RPS4Y1	3.80983	0.0183143	0.0936928	0.444058	0.999573
USP5	3.22001	0.0110713	0.0923679	0.629611	0.999573
ACADM	2.67875	-0.0126004	0.0934873	0.524227	0.999573
SIDT2	2.30618	-0.00187238	0.0923463	0.92269	0.999573
NDUFS5	2.84917	-0.000431593	0.0919022	0.983052	0.999988
YIPF3	2.62407	0.00863975	0.0925977	0.676285	0.999573
MAGEF1	2.43532	0.00661967	0.0924668	0.740343	0.999573
IGF2BP1	3.83422	0.0047233	0.0911574	0.848035	0.999573
MLF2	2.7747	-0.0151739	0.0935011	0.489953	0.999573
XPOT	3.49484	0.00932223	0.0919292	0.691682	0.999573
ATXN10	3.00634	0.0138525	0.0930017	0.541378	0.999573
SPCS3	2.26375	-0.00886066	0.0930385	0.637381	0.999573
KMT2E	2.80817	-0.0332079	0.0999516	0.155895	0.999573
ETF1	3.0955	0.00229561	0.0917188	0.917631	0.999573
GXYLT2	3.02587	0.0118122	0.0926215	0.60399	0.999573
PRUNE2	2.87331	-0.0174889	0.094604	0.383377	0.999573
DCAF12	4.08804	-0.00179132	0.0914257	0.937006	0.999573
TMED2	2.25117	-0.0107277	0.09315	0.583997	0.999573
PHF10	3.08433	-0.00360902	0.0916766	0.870991	0.999573
EDAR	4.90208	0.0239786	0.0947562	0.364139	0.999573
EML1	2.63923	0.0183567	0.0944881	0.387856	0.999573
ANKRD10	5.2619	0.0257127	0.0947661	0.358542	0.999573
SUMO4	2.80316	-0.00332638	0.0921149	0.869775	0.999573
SHROOM3	2.60831	0.0176642	0.0942217	0.414628	0.999573
PRPF19	2.39962	0.0182348	0.0949397	0.344259	0.999573
TMEM59	2.32476	0.000595115	0.092291	0.976163	0.999988
ZC3H18	3.18609	-0.0144226	0.0930417	0.522678	0.999573
ABHD2	2.93237	-0.0563913	0.116902	0.0278707	0.962502
SARAF	2.37485	-0.00388014	0.0924557	0.839711	0.999573
C19orf47	3.48056	-0.0204395	0.0943411	0.393142	0.999573
CHSY1	3.51671	0.0124392	0.0923658	0.601506	0.999573
ARGLU1	4.89462	-0.00512118	0.0907736	0.841252	0.999573
SARDH	3.54326	0.00578485	0.0914588	0.807475	0.999573
SRSF11	4.13374	0.0060058	0.0908661	0.819327	0.999573
NCBP1	3.26277	-0.000936206	0.0914727	0.966263	0.999988
GNB4	2.45893	0.00495699	0.092296	0.807566	0.999573
TXN2	2.46792	-0.0162073	0.0940003	0.436849	0.999573
CMIP	2.02987	-0.0179436	0.0947371	0.362994	0.999573
IL1F10	4.16792	-0.027966	0.0960198	0.301857	0.999573
SSU72	2.33377	0.00881162	0.0929366	0.649864	0.999573
HACL1	3.15687	-0.00952127	0.0922976	0.668482	0.999573
ZNHIT1	3.61284	0.0176781	0.0934266	0.466161	0.999573
SYNC	3.07048	-0.0031033	0.0917763	0.886322	0.999573
CDC27	3.30038	-0.034546	0.100388	0.150719	0.999573
CRIP1	2.22816	0.00959839	0.0929943	0.625801	0.999573
CSRP3	2.10274	-0.0139125	0.0939783	0.455823	0.999573
ARL15	3.25276	-0.0067982	0.0919826	0.75703	0.999573
GALNT1	1.79068	-0.0108779	0.0935787	0.542874	0.999573
LZTS1	3.45419	-0.0489368	0.10993	0.0541164	0.999573
SAR1A	2.62722	0.024274	0.0963184	0.268225	0.999573
DCLK3	2.66773	-0.00459413	0.0923385	0.817166	0.999573
CBX8	4.89507	0.000492161	0.0905234	0.98567	0.999988
SF3B2	2.85983	-5.5588e-05	0.0920529	0.996719	0.999988
[truncated: 6,048 more rows]

## Sheet: myocyte_teton_vs_cnt
Gene	baseMean	log2FoldChange	lfcSE	pvalue	padj
COL1A2	3172.83	-0.648914	0.188174	5.49344e-05	0.000567058
ACTC1	1003.59	1.25142	0.130675	7.35096e-23	1.34707e-20
MYH3	1038.22	0.706866	0.136623	2.57101e-08	6.06608e-07
MTRNR2L10	546.641	0.64024	0.327575	0.00397325	0.0216444
ACTA1	243.313	1.2276	0.32262	8.08226e-06	0.000106595
IGF2	685.81	0.727752	0.102471	1.37512e-13	6.93959e-12
NFYA	689.916	-0.810267	0.0920818	1.25455e-19	1.51947e-17
COL1A1	968.885	-2.66548	0.292493	4.09522e-21	5.83529e-19
COL3A1	748.292	-2.337	0.284184	1.08073e-17	1.01996e-15
TPM2	250.947	1.30246	0.143968	1.03394e-20	1.36612e-18
MYL9	202.412	1.32454	0.127819	2.52046e-26	8.722e-24
MYL1	203.248	1.51309	0.157874	5.8596e-23	1.15086e-20
MYLPF	196.546	1.46216	0.154655	2.29464e-22	3.87793e-20
ALDOA	120.084	0.880876	0.14921	2.8653e-10	9.4218e-09
SPARC	299.211	-0.283946	0.138726	0.0152044	0.0639781
TNNC2	155.023	1.66618	0.174203	7.4147e-23	1.34707e-20
TTN	215.979	0.744838	0.14471	2.58954e-08	6.09002e-07
TUBA1C	264.275	0.522885	0.157569	0.000141504	0.00130001
MEGF10	169.478	3.89601	0.159059	1.86064e-133	1.35213e-129
PRMT8	211.039	-0.571713	0.110289	2.95577e-08	6.86248e-07
TNNT1	140.542	1.15765	0.136628	1.56645e-18	1.67403e-16
VIM	251.277	0.228772	0.0914146	0.00684141	0.0336377
TNNT3	138.217	1.1979	0.151142	1.32275e-16	1.03359e-14
TNNI2	109.008	0.769098	0.155105	6.41391e-08	1.40391e-06
ACTN2	142.975	1.24623	0.128836	2.42489e-23	4.8949e-21
MYBPH	202.792	1.26519	0.121121	1.18177e-26	4.51995e-24
TPM1	120.249	0.992757	0.131294	2.72784e-15	1.80211e-13
LENG1	203.79	-0.380216	0.0847138	1.9558e-06	3.03693e-05
TET3	203.39	-0.748942	0.081294	3.59779e-21	5.22903e-19
THBS4	163.79	0.813859	0.366672	0.00156691	0.0100753
POSTN	271.988	-1.53241	0.122897	4.0536e-37	5.89151e-34
TNNC1	120.447	1.70094	0.13078	7.80861e-40	1.41863e-36
PAGE5	151.888	0.708729	0.141692	6.06837e-08	1.33633e-06
TMEM106C	186.546	-1.16634	0.132706	1.36375e-19	1.62465e-17
SMIM17	132.241	0.253705	0.101129	0.00572106	0.029187
NHLH2	173.208	-0.0703065	0.086161	0.382189	0.601682
DUX4	140.859	0.0792991	0.0765111	0.269322	0.488192
TPM3	95.3143	1.02701	0.119996	8.74283e-19	9.77449e-17
GNAS	121.317	1.14824	0.175901	3.88562e-12	1.64167e-10
MYL4	115.588	1.4182	0.147829	6.36645e-23	1.2175e-20
APOBEC3A_B	152.704	-0.744867	0.0792356	6.27517e-22	9.9134e-20
ZNF140	160.965	-0.512695	0.083085	1.28632e-10	4.45127e-09
SP7	176.529	-0.616378	0.190933	0.000139021	0.00128206
ATP2A2	99.4395	1.29845	0.125989	6.09005e-26	2.01165e-23
CKM	57.4773	1.89094	0.190603	1.81785e-24	4.71797e-22
FN1	192.385	-1.17687	0.154844	1.91154e-15	1.29824e-13
CRYAB	58.9099	1.09528	0.169968	5.84422e-12	2.39943e-10
IL32	111.73	1.36904	0.14044	1.29555e-23	2.76905e-21
DES	97.2285	1.13104	0.113997	2.18178e-24	5.30415e-22
FAM13B	136.888	-0.537095	0.136099	1.11332e-05	0.000141689
PEG10	103.801	1.9066	0.135539	3.72566e-46	9.02478e-43
RPL37A	100.68	0.90575	0.138378	6.06433e-12	2.47582e-10
MYL6B	101.093	0.996694	0.135826	2.00296e-14	1.22315e-12
EEF1G	105.152	0.503225	0.12517	1.03441e-05	0.000133518
NEB	90.4471	0.570078	0.114517	9.01462e-08	1.92109e-06
EIF3A	125.21	-0.0670843	0.0682909	0.305253	0.526531
LYRM2	139.835	-0.998312	0.136351	2.11308e-14	1.27964e-12
ADAM15	130.533	1.94639	0.505868	5.40863e-06	7.47234e-05
PDE7A	115.952	-0.584547	0.102187	1.49513e-09	4.19504e-08
MYH1	49.1505	0.305978	0.271537	0.0562264	0.171933
COL5A2	140.455	-0.609691	0.215687	0.000463591	0.00362639
PDCD4	114.477	-0.647053	0.0838321	1.43607e-15	9.84524e-14
MYH8	87.6018	1.84535	0.195954	2.13908e-22	3.70111e-20
NES	129.916	0.635726	0.134464	2.71562e-07	5.12582e-06
FSTL1	100.754	-0.14038	0.132271	0.203993	0.412011
RPL41	90.4825	0.533741	0.160321	0.000128944	0.00119979
SIGIRR	96.2698	0.0321156	0.121412	0.759694	0.877379
IL24	104.417	-0.778531	0.0967388	1.07304e-16	8.76152e-15
RPS3A	92.5775	0.377287	0.154069	0.00366964	0.0203911
MYOG	100.487	0.901957	0.135814	3.04912e-12	1.31112e-10
EIF4G2	97.7567	0.473636	0.0845734	4.57487e-09	1.21334e-07
ACTA2	74.7162	0.475111	0.18303	0.00145824	0.00944474
HNRNPA2B1	97.7188	0.069058	0.0868214	0.394865	0.615059
DCN	85.5816	0.10091	0.106097	0.286704	0.506805
ENO3	66.9363	1.22161	0.13299	2.62174e-21	3.96921e-19
NCK1	87.955	0.80446	0.138929	6.68898e-10	2.02537e-08
DLK1	80.3814	1.16214	0.133748	2.4038e-19	2.77277e-17
MB	22.6871	1.60078	0.315182	1.80139e-08	4.34906e-07
RTN4	86.4321	0.822318	0.101185	4.73991e-17	4.00522e-15
RPL7A	89.1839	0.524366	0.127973	7.04374e-06	9.39208e-05
HSP90AB1	83.0033	0.680086	0.0965137	2.30758e-13	1.11054e-11
HNRNPA1	106.743	0.0289063	0.114648	0.776115	0.887215
COL6A2	102.87	-0.295555	0.11421	0.00361881	0.0201671
IGFBP5	111.211	-0.25302	0.115935	0.0138413	0.059342
ZNF106	94.1991	0.864055	0.14746	4.40903e-10	1.41147e-08
ETV3	95.8992	-0.629243	0.0965146	9.46791e-12	3.73931e-10
FLNC	70.978	0.523344	0.11424	6.98153e-07	1.21666e-05
GOLGA8A	95.0657	-0.386039	0.117599	0.000249323	0.00212407
RPL32	63.1166	0.54708	0.145749	2.74643e-05	0.0003148
PTBP1	114.517	-0.218194	0.183447	0.103615	0.26635
GPC1	95.3569	0.655853	0.14786	1.11769e-06	1.85864e-05
STBD1	88.5059	-0.556966	0.105267	1.71832e-08	4.17628e-07
CKB	93.4738	1.12134	0.140533	1.24672e-16	9.84776e-15
PDE4DIP	61.4541	0.590335	0.124075	2.37169e-07	4.54751e-06
DDX17	103.76	-0.783784	0.107054	2.26141e-14	1.35816e-12
TPI1	63.2376	1.06571	0.125017	1.38412e-18	1.50125e-16
MYH7	45.9137	0.359352	0.239267	0.0258041	0.0970113
DYNC1H1	92.6751	-0.30107	0.0865094	0.000193007	0.00170216
RPS12	69.7553	0.636779	0.148422	2.17438e-06	3.34063e-05
SRL	76.3364	0.846964	0.116479	2.6916e-14	1.59023e-12
RPL34	71.4989	0.521931	0.137318	2.39725e-05	0.000280077
PLEC	83.6669	-0.0237705	0.10521	0.800337	0.900038
MEPCE	93.9459	-0.813018	0.0958079	2.21415e-18	2.33191e-16
BIN1	68.5852	1.21626	0.110346	1.82365e-29	1.10437e-26
NACA	81.9127	0.317646	0.121321	0.00313168	0.0178634
TUSC2	97.2187	-0.966493	0.102317	2.84642e-22	4.59665e-20
RPS17	67.9574	0.76788	0.14113	5.65558e-09	1.47838e-07
TMEM30A	87.5307	-0.406335	0.0860443	5.91678e-07	1.0411e-05
FTH1	67.6878	0.242925	0.119698	0.0203403	0.080508
COL6A1	112.841	-1.40661	0.206877	8.1962e-13	3.69949e-11
RPL17	70.8921	0.518313	0.148325	7.79254e-05	0.000776824
RPL6	69.7532	0.572659	0.131113	2.01405e-06	3.10825e-05
JPH4	83.4346	-0.015212	0.0844708	0.846883	0.925925
TNFAIP8	59.9249	0.376488	0.151521	0.00309991	0.0177239
COL5A1	117.185	-1.91935	0.189157	4.42645e-25	1.28803e-22
TMSB10	79.2878	0.605228	0.168862	4.2958e-05	0.000462483
CD63	65.4668	0.18136	0.107328	0.059194	0.178396
FHL1	25.4533	0.681013	0.169174	5.0982e-06	7.11106e-05
CDKN1A	70.9898	1.60285	0.143738	5.42635e-30	4.26291e-27
TNC	108.299	-0.388405	0.305355	0.0282963	0.104014
CCDC47	80.1497	-0.60063	0.102649	6.0542e-10	1.86423e-08
RPL7	67.786	0.421194	0.159832	0.00179552	0.0112097
RPL4	64.7524	0.708008	0.117421	1.91674e-10	6.41888e-09
AAMP	84.0887	-0.704251	0.0913299	1.4318e-15	9.84524e-14
UBE2Z	84.2677	-1.18324	0.131833	2.5878e-20	3.35813e-18
RPS23	59.0191	0.609567	0.170269	4.41687e-05	0.000474059
RPS24	67.8954	0.46674	0.117321	1.3935e-05	0.000171928
SLN	29.8122	1.91842	0.195792	4.92464e-24	1.11835e-21
ANKRD36B	76.8522	-0.536292	0.0846395	4.41652e-11	1.62918e-09
RPS28	63.0069	0.583459	0.142281	5.87445e-06	8.03948e-05
MARCKS	83.1458	0.157643	0.110375	0.10618	0.270037
HSPA8	63.9258	0.6875	0.108423	3.03095e-11	1.13536e-09
TESC	72.6135	0.373544	0.126472	0.000832956	0.00600475
TUBB6	78.0514	1.15638	0.118633	1.67901e-23	3.48611e-21
RAD23B	72.0533	-0.386343	0.0981319	2.28577e-05	0.000267915
AK1	40.4006	1.50235	0.139482	2.77703e-28	1.34538e-25
RPS8	62.55	0.256657	0.135456	0.0260393	0.097636
MAGEA3	77.0754	-0.692324	0.109077	2.35739e-11	8.9692e-10
MYBPC1	44.6362	0.46742	0.130327	5.92388e-05	0.000604619
RPL5	64.1383	0.547945	0.123824	1.62121e-06	2.56115e-05
MAZ	79.0818	-0.494285	0.102995	2.89784e-07	5.4556e-06
ITM2B	61.6962	0.706102	0.160456	9.58002e-07	1.6228e-05
RPL9	60.8818	0.459208	0.158276	0.00072161	0.00531301
RPL29	58.2383	0.841286	0.169531	6.62202e-08	1.44511e-06
BASP1	87.2635	-0.756582	0.108088	3.32258e-13	1.55776e-11
RPL35	59.0561	0.743696	0.12825	7.81734e-10	2.30929e-08
SERBP1	65.5808	0.801528	0.0981028	3.43319e-17	2.97012e-15
PCBP1	61.4984	0.601735	0.0983495	1.47507e-10	5.00904e-09
JPT1	56.2427	1.1545	0.159734	4.40669e-14	2.50183e-12
PKM	57.4197	0.497336	0.122028	7.63854e-06	0.00010111
CASQ2	54.4135	1.15485	0.142312	3.38975e-17	2.96787e-15
FUS	70.0617	0.0217769	0.0858584	0.786934	0.892424
PFN1	62.3593	0.606743	0.138477	1.63742e-06	2.57558e-05
RPS4X	55.8608	0.317968	0.136293	0.00675639	0.0334004
ZNF506	76.7024	-0.656729	0.150105	1.5645e-06	2.50977e-05
QKI	60.6828	0.151842	0.110542	0.120254	0.292348
MAGED2	62.7372	0.522069	0.105581	1.33757e-07	2.7458e-06
PDLIM3	38.5596	0.487934	0.150161	0.000186597	0.00165366
CA3	12.956	0.567122	0.298598	0.00478924	0.0252748
NFE2L1	58.2236	0.517109	0.0992188	3.03981e-08	7.0128e-07
HSPB1	43.1695	1.0635	0.173083	6.86469e-11	2.48187e-09
RPS6	57.6996	0.48041	0.143441	0.000154489	0.00140334
TTYH3	80.3355	-0.673701	0.0945081	1.44477e-13	7.24077e-12
PRELID3B	66.1102	-0.590873	0.10036	5.01976e-10	1.5656e-08
TMSB4X	62.8667	0.0860964	0.173828	0.488977	0.696201
TASOR2	73.0701	-0.766912	0.0935738	2.7733e-17	2.48809e-15
RPL38	46.7133	0.767041	0.159244	1.52475e-07	3.07788e-06
SPTAN1	72.2578	0.345289	0.11985	0.00124607	0.00831121
PDLIM7	69.8268	-0.498151	0.108714	9.27584e-07	1.57494e-05
RPSA	54.8352	0.458712	0.129847	8.21295e-05	0.000810917
RPL37	52.6118	0.68	0.148207	5.06262e-07	9.12206e-06
FABP1	68.611	-0.587608	0.141865	4.18559e-06	5.92917e-05
DUX5	67.7148	-0.599641	0.0965745	7.6927e-11	2.74034e-09
LDB3	37.4158	0.853855	0.123081	2.91123e-13	1.37376e-11
STAC3	53.8957	0.737918	0.14122	1.837e-08	4.42037e-07
SPTBN1	68.104	0.787718	0.110812	1.11016e-13	5.72168e-12
ACTN3	47.7803	0.979613	0.0997666	8.3674e-24	1.8426e-21
RPL19	47.9357	0.616088	0.144308	2.73617e-06	4.0579e-05
AHNAK	59.771	-0.0446736	0.10086	0.624594	0.795744
RUVBL2	58.5467	-0.443195	0.106444	7.54595e-06	0.000100249
ACSF2	61.7644	-0.171897	0.102295	0.0622634	0.184756
AK8	43.6977	-0.263775	0.206218	0.0650671	0.191125
ATP5F1B	47.5559	1.01067	0.12543	5.64189e-17	4.7126e-15
PCBP2	55.9771	0.130106	0.0996727	0.150669	0.341095
RPL21	52.4621	0.391478	0.130176	0.000691309	0.00513151
CHRNA1	49.4177	0.466838	0.143564	0.000213117	0.00185032
LRRN1	71.1908	0.693656	0.134671	3.10139e-08	7.13221e-07
IFITM2	61.7696	-0.551981	0.0927964	4.56718e-10	1.45569e-08
RPL27A	51.0045	0.35986	0.145826	0.00374388	0.0207244
LMNA	61.6734	0.405783	0.103046	2.07234e-05	0.000244475
RPL18	51.5991	0.663062	0.146282	7.54359e-07	1.30834e-05
SERPINF1	46.9241	0.410846	0.176824	0.00392289	0.0214343
MAGED1	62.1775	0.206043	0.106799	0.032024	0.113812
IGFBP4	53.0597	-0.205058	0.127321	0.0590591	0.178158
C12orf57	57.353	0.057133	0.0927404	0.503296	0.707802
STMN1	51.8503	0.754222	0.147811	4.01042e-08	9.02282e-07
RPS18	52.8006	0.50556	0.142546	6.95539e-05	0.000702012
APP	60.9618	0.0203448	0.141027	0.858015	0.93132
RPL15	52.019	0.402851	0.155259	0.0021849	0.0132979
CSDE1	50.2788	0.518891	0.101723	5.73708e-08	1.27108e-06
MACF1	66.0612	0.321244	0.110733	0.00127374	0.00844552
RTL8C	44.9199	0.550409	0.129008	3.41195e-06	4.96886e-05
ANXA6	54.1881	0.636608	0.102292	6.33717e-11	2.30928e-09
PALLD	67.489	0.0776404	0.110525	0.429954	0.647828
RPL13	54.4042	0.551397	0.23323	0.00195003	0.0119687
RPL26	42.8094	0.393593	0.147786	0.00190622	0.0117593
ZNF723	69.397	-1.03197	0.108977	2.56041e-22	4.22874e-20
H4C1	57.3761	-0.743808	0.10415	8.30465e-14	4.4051e-12
HSPB8	24.0252	1.11435	0.2431	2.50213e-07	4.74752e-06
RPS15	42.3398	0.610542	0.134009	7.73557e-07	1.33526e-05
CNN3	60.8538	0.162827	0.10772	0.0912799	0.243117
MYH9	57.1172	-0.467089	0.141148	0.000171212	0.00153226
CAPNS1	41.2508	0.455315	0.116723	2.05632e-05	0.000243376
COL6A3	92.104	-1.68963	0.348775	6.76758e-08	1.47246e-06
PHAX	68.4639	-1.00036	0.119218	5.23313e-18	5.20948e-16
LDHB	45.4479	0.697283	0.118409	4.869e-10	1.52513e-08
CACNA2D1	48.1812	0.819289	0.114892	7.38621e-14	3.97597e-12
CCDC88B	56.2162	-0.757665	0.11542	5.74401e-12	2.37169e-10
KIF1B	45.7081	0.415623	0.112224	4.76705e-05	0.000503364
HNRNPU	52.2083	0.338919	0.094276	0.000112284	0.00106942
TMA7	54.5881	0.0931823	0.113747	0.353181	0.573535
GAL3ST2	49.0722	-0.125475	0.14184	0.276336	0.494241
RACK1	48.2502	0.423583	0.149639	0.00102224	0.00712237
PTMA	56.8108	-0.223781	0.157519	0.0753648	0.211621
ITPRID2	55.4588	-0.453892	0.0944325	3.32596e-07	6.18153e-06
EIF3C	49.5304	0.331729	0.116719	0.00156398	0.0100668
SIGMAR1	54.5843	-0.469005	0.106238	1.90679e-06	2.96717e-05
RPS11	41.2284	0.460673	0.140827	0.000218192	0.00189212
SRSF5	57.7268	-0.426683	0.100021	4.41246e-06	6.21422e-05
NAP1L1	55.36	0.123628	0.10879	0.201733	0.409152
MZT2B	53.8972	0.0612109	0.130091	0.57898	0.765825
RPS14	41.7926	0.383554	0.158388	0.00389186	0.0212968
ATP2A1	35.3437	0.450233	0.148809	0.000442551	0.00348431
CANX	45.6944	0.20239	0.108139	0.0364273	0.125044
RPS3	51.8003	0.447977	0.158867	0.000957825	0.00671274
RCN1	49.4061	0.133857	0.108996	0.169318	0.365766
INPPL1	61.55	0.222968	0.115533	0.0285027	0.104558
RPL10A	46.6444	0.238676	0.136864	0.0397192	0.133321
HNRNPA3	49.5809	0.266048	0.103984	0.00480114	0.0253192
RPS20	43.7015	0.245793	0.150931	0.0465721	0.149158
CFL1	48.3752	0.518413	0.137579	2.81625e-05	0.000321224
MAPKBP1	52.258	-0.723587	0.102997	2.50764e-13	1.19104e-11
RPS27A	42.7323	0.545668	0.150316	4.4229e-05	0.000474059
SFRP4	53.0385	-1.02082	0.227997	5.37952e-07	9.55818e-06
MYL6	45.9787	0.00102642	0.119959	0.992305	0.996556
B2M	40.7986	0.314426	0.136234	0.00696887	0.0341718
R3HDM4	55.466	-0.295848	0.135966	0.0109742	0.0491069
FAM3C	54.3632	-0.575018	0.102866	3.90562e-09	1.0551e-07
MORF4L1	44.8825	0.57983	0.103104	2.79634e-09	7.66831e-08
RPL30	43.001	0.336748	0.13792	0.00464557	0.0247201
EEF1D	44.3504	0.539726	0.106817	7.9138e-08	1.70652e-06
NPNT	52.4612	0.392938	0.12742	0.000508768	0.0039374
SETD7	47.7978	0.847761	0.119288	1.28997e-13	6.55538e-12
MYADM	46.6605	0.697224	0.145663	2.24339e-07	4.34738e-06
CCDC8	54.6504	0.250518	0.107604	0.00983409	0.0450027
MEST	59.1857	-1.25703	0.136518	4.3106e-21	6.02407e-19
DMPK	40.3236	0.560686	0.11439	1.37027e-07	2.79711e-06
TMEM50B	61.7747	-0.869174	0.113296	1.21021e-15	8.45634e-14
PPIA	46.6257	0.176577	0.132894	0.116425	0.28583
RPS2	43.4469	0.418549	0.157546	0.00169703	0.0107238
HRC	41.6024	0.9871	0.124316	1.76461e-16	1.34983e-14
BIRC5	56.2099	-0.791225	0.105256	7.29042e-15	4.64732e-13
TMEM213	53.6053	-0.399037	0.106627	4.64087e-05	0.000493251
ZNF587	57.1869	-1.1643	0.157731	1.82476e-14	1.12378e-12
SRRM2	56.0715	-0.345272	0.0957489	0.000101282	0.000976145
PRKACA	37.286	0.583078	0.118354	1.10251e-07	2.30891e-06
MARCKSL1	51.0879	0.529048	0.144187	4.18973e-05	0.000452404
OGN	66.0193	-1.02898	0.143411	7.14061e-14	3.87245e-12
RPL8	45.463	0.619877	0.134487	5.62449e-07	9.96907e-06
TNNT2	45.2827	0.718483	0.143275	5.77747e-08	1.27613e-06
RPRD1B	48.2878	-0.543548	0.10166	1.44554e-08	3.55416e-07
THEM5	52.8741	-0.810307	0.111772	3.53306e-14	2.03859e-12
KRT28	50.8613	-0.702025	0.107272	6.29996e-12	2.54344e-10
RPL31	40.1663	0.623338	0.164112	1.8563e-05	0.000222236
TCAP	19.5788	0.833776	0.175899	1.87035e-07	3.7035e-06
MEF2C	45.9869	0.884531	0.106774	1.23054e-17	1.13195e-15
EIF4G1	49.3072	0.240053	0.0994784	0.0083028	0.0396429
DVL1	45.3267	-0.0484223	0.102545	0.600503	0.779538
ARF1	43.6124	0.216866	0.120148	0.0400864	0.133753
MUSTN1	24.1063	1.41369	0.243745	3.74469e-10	1.20945e-08
PPP1R14B	44.4712	0.542128	0.12805	4.07375e-06	5.78202e-05
RPL28	39.0649	0.42438	0.160079	0.0016937	0.010712
EIF4A1	46.2776	0.395718	0.103253	3.50491e-05	0.000388858
ITM2A	43.0013	0.269873	0.213734	0.0641702	0.189255
SYNPO2L	46.0833	0.722858	0.132537	5.84535e-09	1.51168e-07
SELENOW	37.109	1.14096	0.152192	6.9883e-15	4.49416e-13
YWHAZ	45.9805	0.456816	0.116302	1.87273e-05	0.000223835
C4orf46	52.9712	-0.941322	0.111123	2.8891e-18	2.9993e-16
RPS5	35.1002	0.554228	0.149413	3.11447e-05	0.000350354
DDX5	48.4806	-0.202556	0.104538	0.0320218	0.113812
STK25	39.8974	0.347334	0.119125	0.00110095	0.00755488
ELK1	46.8262	-0.802675	0.0967644	1.09588e-17	1.021e-15
NPM1	46.3215	0.28647	0.113784	0.00496214	0.0260737
NFIX	44.08	-0.223115	0.131605	0.0446424	0.144635
OLFML3	48.8894	-0.51501	0.10591	2.00966e-07	3.94708e-06
POLR2E	49.2943	-0.397434	0.0996557	1.78573e-05	0.000215079
MYOT	35.6061	1.21235	0.111448	1.30458e-28	6.77169e-26
ATP5F1A	34.1418	0.754444	0.115944	8.05966e-12	3.20052e-10
TLE5	37.7812	0.273916	0.131846	0.0154411	0.064712
HDLBP	48.3156	-0.103704	0.095847	0.237493	0.453816
LGALS1	36.7446	-0.0226559	0.131168	0.835488	0.92076
S100A6	28.3438	0.394767	0.167183	0.00402375	0.0218703
UBA52	34.4351	0.824144	0.143472	8.9879e-10	2.63367e-08
RDH13	47.0339	-0.358226	0.104422	0.00017389	0.0015524
TOMM34	45.8	-0.439627	0.119854	4.77943e-05	0.000503364
OBSL1	52.2415	0.335881	0.129091	0.00290622	0.0168015
FNDC5	48.3768	0.554742	0.147489	2.57542e-05	0.000298019
ARRDC1	44.6962	-0.242809	0.0971206	0.00652829	0.0325162
MYL12A	26.0233	0.634247	0.160557	9.33883e-06	0.000121622
ITGB1	50.7967	-0.191262	0.116372	0.0610562	0.182141
NBPF15	51.2904	-0.698526	0.0985351	1.6849e-13	8.27307e-12
CIRBP	49.9448	0.0311505	0.104659	0.742052	0.868916
CFDP1	43.6062	-0.484238	0.107401	1.25554e-06	2.05707e-05
DBN1	51.4828	0.309828	0.124614	0.00475289	0.0251543
MAP4	44.8976	0.124668	0.0997999	0.167746	0.363942
CLTB	41.9214	0.0653666	0.0921202	0.44385	0.658564
TRIM17	43.2012	-0.244108	0.0968865	0.00580591	0.0295873
MEGF8	49.2697	-0.638833	0.102869	7.55009e-11	2.70278e-09
EGR1	48.5533	0.0383445	0.123893	0.717025	0.855231
TUBB4B	40.3182	0.327574	0.124462	0.002748	0.0161307
MRFAP1	35.672	0.388848	0.116424	0.000229346	0.00197941
EBI3	43.8333	-0.384123	0.104905	6.53749e-05	0.000662593
NREP	37.567	0.267411	0.132059	0.0180662	0.0734273
CFL2	31.9145	0.854604	0.12421	5.88245e-13	2.68854e-11
HSPG2	44.2318	0.198399	0.132411	0.0747391	0.210434
HNRNPCL3	47.0873	-0.585809	0.102332	1.36646e-09	3.87894e-08
UNC45B	42.1646	0.62922	0.107595	6.17639e-10	1.88587e-08
ERF	43.9695	-0.527536	0.104463	7.29217e-08	1.58186e-06
NCL	48.8491	0.300739	0.110322	0.00256327	0.0151812
NBPF12	53.7435	-0.686479	0.116603	5.95835e-10	1.84252e-08
RNF181	45.8448	0.231421	0.11567	0.0238676	0.0913834
EIF5A	35.2094	0.574218	0.128929	1.3074e-06	2.12548e-05
PTP4A3	43.2691	-0.589663	0.102585	1.33041e-09	3.7914e-08
DCX	51.665	0.916168	0.109013	4.42774e-18	4.46894e-16
MYOM1	33.806	0.802494	0.126109	2.10418e-11	8.09053e-10
CHD4	47.3112	0.130051	0.12702	0.23095	0.44553
KREMEN2	53.7432	0.116283	0.118477	0.259773	0.478523
PLD3	48.9326	-0.100699	0.0946884	0.246274	0.464235
PHC2	45.2635	-0.117048	0.0991667	0.194729	0.400548
CTNNB1	46.8857	0.594744	0.128122	5.30425e-07	9.47076e-06
SRSF1	41.1015	-0.10989	0.108184	0.254559	0.472753
MYOM3	35.3913	0.717169	0.119373	1.84506e-10	6.20744e-09
P4HB	48.762	-0.61194	0.112324	7.13456e-09	1.80651e-07
SVIL	45.3057	0.333085	0.101134	0.000333721	0.00272488
NME2	32.7535	0.540684	0.16309	0.000141923	0.00130222
CALR	51.2318	-0.455258	0.123689	4.75769e-05	0.000503364
CALU	43.4499	0.153513	0.116151	0.130651	0.30875
PTMS	49.5457	-0.720919	0.150272	2.10738e-07	4.09474e-06
MMP14	58.3396	-1.36227	0.134481	4.4311e-25	1.28803e-22
CHPF	47.8524	0.180709	0.0997234	0.0468384	0.149535
STIP1	38.0682	0.376678	0.120473	0.000456134	0.00357576
LDHA	26.8882	0.413798	0.147367	0.001137	0.00772206
ENAH	43.4904	0.696036	0.105304	5.07471e-12	2.10731e-10
SLC25A3	34.9984	0.489776	0.134291	5.00174e-05	0.000521487
GYS1	34.6394	0.671842	0.115797	7.5471e-10	2.24774e-08
CCNI	40.6393	0.308098	0.109535	0.00191127	0.0117705
LENG8	45.5482	-0.89118	0.113685	4.52521e-16	3.28847e-14
CHRND	45.0677	0.327808	0.125159	0.00286381	0.0166891
RPL27	42.8762	0.19988	0.113793	0.0463346	0.148857
SMYD1	30.7122	1.04146	0.128294	3.84312e-17	3.28564e-15
HSPA5	44.3657	-0.301997	0.120365	0.00441799	0.0236941
PFKM	23.5555	0.321601	0.137117	0.00596131	0.0302098
RPL26L1	28.8336	0.276322	0.143376	0.0204438	0.0807855
HMGB1	39.851	0.133429	0.0992938	0.140562	0.324302
RASL10A	49.1861	-0.50759	0.152438	0.000124178	0.00116139
RPS13	32.2702	0.716216	0.162746	1.22139e-06	2.02183e-05
SEPTIN7	38.1026	0.243862	0.100817	0.00783312	0.0376976
SKI	38.2163	-0.0697498	0.0945248	0.421978	0.640058
MYL3	10.5687	0.912789	0.201518	4.51724e-07	8.24794e-06
TUBB2A	38.5227	0.745822	0.128685	7.66325e-10	2.27301e-08
BTBD6	40.6565	-0.537244	0.109349	1.49035e-07	3.02525e-06
UQCRC2	30.8377	0.44319	0.118811	4.00815e-05	0.000440654
BTF3	33.1312	0.535389	0.123241	2.1817e-06	3.34481e-05
RPS27	33.6587	0.344336	0.138231	0.00395081	0.0215383
CCND2	44.5408	-0.408181	0.154114	0.00182617	0.0113464
FIZ1	42.5888	-0.724141	0.100015	5.54675e-14	3.07696e-12
RPL22	34.0415	0.502056	0.148813	0.000135872	0.00125621
CDC37	35.7088	0.0511664	0.101021	0.575298	0.763452
RNF167	41.0088	-0.758384	0.119856	2.54486e-11	9.63204e-10
MAP4K4	42.6405	0.340258	0.104314	0.000362952	0.00291826
HSPA9	31.6382	0.320513	0.114611	0.00178694	0.0111849
EPC1	40.4894	-0.729944	0.111338	7.48393e-12	2.98823e-10
CLSTN2	48.0828	0.594402	0.12109	1.17001e-07	2.42928e-06
RPL24	32.3369	0.675742	0.156655	1.99326e-06	3.0885e-05
ATP1A1	42.847	0.881096	0.11327	6.50836e-16	4.6828e-14
TRIO	38.0953	0.172578	0.109474	0.0760914	0.212675
RPL18A	31.2812	0.373446	0.153695	0.00408498	0.0221204
BLCAP	38.9803	0.0943305	0.106999	0.325593	0.547705
PYGM	15.5861	0.58567	0.180769	0.000137628	0.00127083
ZNF391	42.5401	-0.211383	0.103744	0.0236909	0.0909947
GABARAP	30.266	0.376267	0.125939	0.000753109	0.00551698
NPIPA1	46.4933	-1.13517	0.108661	1.90437e-26	6.91954e-24
ITM2C	53.3351	-0.96949	0.135055	7.6445e-14	4.08475e-12
PRRC2B	46.0539	-0.496033	0.130394	2.65665e-05	0.000305472
DDB1	38.4865	0.746118	0.121886	8.39741e-11	2.97146e-09
RPS19	33.6038	0.497611	0.157129	0.000270402	0.0022849
RAPSN	36.5196	0.706459	0.144587	1.1612e-07	2.41789e-06
HNRNPDL	37.2266	0.0332113	0.101471	0.719251	0.85615
FAM171A2	43.2305	0.771205	0.127055	1.46226e-10	5.00904e-09
FKBP9	36.2262	0.0734725	0.115232	0.466268	0.679168
YBX1	27.7609	0.648947	0.163818	8.82706e-06	0.000115997
NUCKS1	35.2473	0.0396547	0.106722	0.67626	0.825391
DYNLL2	31.5244	0.368622	0.113511	0.000326741	0.0026739
HNRNPL	40.8276	0.113449	0.104678	0.229703	0.443951
HNRNPC	37.2573	0.579629	0.119252	1.92421e-07	3.78949e-06
ATP5MC2	35.714	0.305698	0.127643	0.00585003	0.0297288
PRKAR1A	31.1058	0.491859	0.135653	5.09189e-05	0.000528616
PTP4A2	31.9663	0.265784	0.117187	0.0100662	0.0458051
ATF4	33.9764	0.0293503	0.11145	0.767824	0.88137
ZNF383	41.1951	-0.551272	0.120788	7.48836e-07	1.30186e-05
MYOZ1	18.7429	0.799447	0.151599	1.06312e-08	2.65489e-07
NPIPB6	44.573	-0.668775	0.140386	2.05118e-07	3.99623e-06
CTNNA1	37.2254	0.386881	0.129519	0.00068488	0.00508898
TCEAL7	28.7245	0.613949	0.150872	6.08284e-06	8.29343e-05
KPNB1	36.5709	0.272444	0.108286	0.0051266	0.0267444
KLHL41	30.8504	0.593327	0.114714	2.97379e-08	6.88234e-07
VCP	32.8963	0.269095	0.127145	0.0141331	0.0603439
CYCS	27.0088	0.505534	0.125501	9.23811e-06	0.000120743
TRAK1	30.6602	0.533449	0.125998	3.51856e-06	5.08337e-05
PPP1CB	32.0747	0.440939	0.117413	3.61094e-05	0.00040001
VDAC1	30.3095	0.530604	0.134619	1.38031e-05	0.000170591
RYR1	33.3757	0.081453	0.129269	0.453475	0.667355
CDH15	35.3963	0.523537	0.133175	1.33753e-05	0.000166436
PSMG3	38.5154	-0.442325	0.11177	1.5525e-05	0.000189613
RPS9	33.746	0.114661	0.114153	0.258098	0.476888
NBL1	35.8073	-0.794184	0.12902	8.6277e-11	3.02886e-09
ATP5MC3	26.8474	1.1518	0.130033	6.14376e-20	7.56724e-18
SULT1C4	39.5579	-1.08293	0.108581	2.18968e-24	5.30415e-22
SERPINH1	39.7431	-0.429797	0.127595	0.000172785	0.00154444
CACNA1S	32.3701	0.174813	0.122892	0.0988313	0.257237
LAMB1	38.6089	-0.105575	0.105162	0.264169	0.482341
CTTN	36.0581	-0.0400488	0.10713	0.675171	0.824819
MALRD1	36.3214	-0.806218	0.110692	3.53464e-14	2.03859e-12
PGK1	26.5886	0.283903	0.122755	0.00838845	0.0399207
ARMCX3	38.7382	0.4558	0.105222	2.91446e-06	4.29602e-05
ZNF470	38.191	-0.769358	0.111526	5.42389e-13	2.49465e-11
CAPN6	35.7252	0.351358	0.108211	0.000354387	0.00286785
TMEM132A	42.5892	0.313451	0.116474	0.00251738	0.0149337
EIF4A2	37.4492	-0.0414584	0.107554	0.665673	0.819387
PABPC1	39.8023	0.13493	0.106247	0.158233	0.351968
HIPK3	37.7432	0.584785	0.131994	1.28607e-06	2.09548e-05
KRAS	35.4572	-0.658225	0.109363	2.30964e-10	7.664e-09
FBXO15	45.4927	-0.898723	0.186041	8.95647e-08	1.91431e-06
RPL36A	27.9095	0.458002	0.173875	0.00161141	0.0103416
IDH2	31.539	0.56811	0.124844	7.80406e-07	1.34166e-05
EHBP1L1	32.3588	0.448016	0.139978	0.000247615	0.00211199
RPLP2	30.2274	0.602816	0.142532	3.32404e-06	4.86032e-05
RAN	28.9707	0.539133	0.159377	0.00011809	0.00111449
SEPTIN9	39.7574	0.237634	0.115612	0.0203328	0.080508
CYB5R1	30.4167	0.446016	0.145163	0.00042468	0.00336548
ACO2	23.8469	0.620442	0.12769	1.49789e-07	3.03208e-06
H2AJ	36.2302	0.0604466	0.146977	0.60279	0.781112
EIF4H	34.449	0.131883	0.107658	0.170528	0.366685
ATAD3A	35.1314	-0.135901	0.101952	0.140753	0.324302
DDRGK1	32.0613	0.130346	0.117278	0.202299	0.409666
ANKRD36	34.5614	-0.446442	0.12914	0.000109209	0.0010415
GTF2I	37.7823	-0.0699425	0.101805	0.446169	0.659945
FKBP10	44.9348	-1.33271	0.123699	6.54409e-28	2.97224e-25
RPL35A	30.9191	0.631017	0.161929	1.24607e-05	0.000156665
YWHAG	32.3643	0.573353	0.135368	3.40731e-06	4.96886e-05
RAB1A	35.0888	-0.0114868	0.104218	0.901977	0.957305
COL12A1	54.7981	-1.70434	0.170719	1.74019e-24	4.6837e-22
BCL2L2	35.3208	-0.474026	0.118512	1.22669e-05	0.000154763
UBB	25.3744	0.725536	0.154077	2.9883e-07	5.5969e-06
GSN	32.3877	-0.137446	0.114318	0.170881	0.36696
GNAI2	29.8135	0.376322	0.139546	0.001799	0.0112217
ZNF574	34.6835	-0.630682	0.118493	1.44768e-08	3.55416e-07
SMPX	26.5732	1.58644	0.133786	1.44363e-33	1.31136e-30
EMC10	33.7795	0.110349	0.108036	0.252699	0.470203
MYBPC2	23.4021	0.223758	0.135765	0.0494441	0.155478
TRIP12	34.0704	0.351053	0.109255	0.000391284	0.00313848
NEBL	26.5149	0.496688	0.153315	0.000178211	0.00158482
NRAP	12.1284	0.441899	0.199781	0.00431197	0.0231597
RPL13A	31.7753	0.25135	0.142148	0.0347269	0.120723
MAP1A	37.3101	0.269522	0.140463	0.0220435	0.0857353
RAPGEF1	35.1458	0.668603	0.124622	9.21558e-09	2.32533e-07
ARHGDIA	36.491	-0.00700772	0.105869	0.944922	0.975945
CYP2A6	32.1895	-0.565183	0.127013	1.25683e-06	2.05707e-05
CD81	32.707	-0.183462	0.120962	0.0819992	0.224398
RPL12	29.1844	0.440867	0.161727	0.00132284	0.00869176
ZFAND3	30.4008	0.167381	0.11193	0.091399	0.243117
HSP90B1	38.667	-0.616145	0.139627	1.31367e-06	2.13091e-05
SKP1	31.2276	0.076682	0.118186	0.458562	0.67212
FNDC3B	38.3422	-0.0444525	0.116678	0.659911	0.816601
MDH1	21.7607	0.724987	0.143928	4.73164e-08	1.05799e-06
RPN1	31.314	0.217198	0.113285	0.030274	0.10875
HNRNPD	35.0661	-0.0601115	0.106433	0.530211	0.729343
NBPF14	40.5362	-0.665558	0.105109	3.29525e-11	1.22803e-09
MAP2K7	33.6816	0.00875518	0.109545	0.926443	0.965505
PRDX2	24.9895	0.138766	0.117718	0.176845	0.376363
HNRNPH1	35.9066	-0.44595	0.109241	1.03879e-05	0.000133846
SLC39A7	36.3668	-0.0673504	0.104644	0.472388	0.684106
TRIM51	35.3005	-0.210485	0.106139	0.0273642	0.101096
VAMP8	30.7012	-0.335333	0.114145	0.00109811	0.00754253
RPN2	30.6632	0.0796571	0.120322	0.443084	0.658214
PDLIM4	32.0735	0.427677	0.128801	0.000206554	0.00180412
CALM3	33.5416	-0.0665136	0.10138	0.468744	0.681357
CRIP2	25.1143	0.76001	0.139218	5.04963e-09	1.32475e-07
SFPQ	36.7013	-0.241154	0.112338	0.0159376	0.0663337
OCIAD1	31.2471	0.427384	0.111814	2.91253e-05	0.000330709
C4orf54	29.9463	1.15179	0.151995	3.41054e-15	2.23283e-13
CAV3	30.0522	1.19055	0.136374	1.8103e-19	2.12185e-17
PSMD2	31.124	0.47991	0.121511	1.36384e-05	0.000169172
RPL36	27.2874	0.645693	0.165842	1.23812e-05	0.000155934
FCF1	34.4296	-0.555207	0.123948	1.19882e-06	1.989e-05
PRMT1	29.2597	0.602996	0.129447	4.04337e-07	7.45765e-06
YWHAE	29.9421	0.662485	0.123711	1.10036e-08	2.73847e-07
GPRC5B	34.1939	0.379664	0.125894	0.000675261	0.00503811
NEXN	29.7585	0.585244	0.122076	2.41445e-07	4.61732e-06
PNN	34.4299	-0.131609	0.115477	0.192937	0.398204
OAZ1	24.9001	0.147861	0.133571	0.188843	0.393066
ATP1B1	23.6358	-0.15446	0.120209	0.1387	0.321612
TRIM28	34.6681	0.012661	0.108027	0.895685	0.953692
ATRX	34.1446	-0.638484	0.11481	4.16513e-09	1.11279e-07
TPPP3	21.7122	1.12288	0.180033	3.78261e-11	1.40246e-09
EIF2S3B	34.8967	-0.0881774	0.110582	0.366007	0.586369
IGHG4	34.2935	-0.468418	0.111673	5.1737e-06	7.18877e-05
GRB2	27.6499	0.576415	0.121802	3.23271e-07	6.03911e-06
COX5A	16.8401	0.616572	0.159433	1.46791e-05	0.000180801
USO1	28.4475	0.146232	0.106383	0.124224	0.299218
SRGAP2B	36.1845	0.0900525	0.0994501	0.318156	0.539189
TGFB3	36.2062	-0.152137	0.161476	0.216336	0.426163
CARD9	31.8974	-0.443296	0.116823	3.14718e-05	0.000353486
SEPTIN5	29.644	0.268554	0.111209	0.00691081	0.033933
TLN1	32.7259	0.0188067	0.110982	0.851965	0.92836
NFAM1	33.8933	-0.551704	0.124489	1.43705e-06	2.31554e-05
SERF2	27.2284	0.0504717	0.128969	0.645351	0.808397
DDOST	33.014	0.0205684	0.107745	0.826742	0.915285
DNM2	29.8329	-0.321195	0.129502	0.00447965	0.0239541
EIF4B	34.5593	0.168994	0.106863	0.077269	0.215304
PXDN	43.9027	-1.0809	0.152071	1.16515e-13	5.96279e-12
DLGAP4	28.7043	0.0968704	0.11361	0.331798	0.552643
MTCH1	31.5108	0.399314	0.138341	0.000886078	0.00633773
VASH2	36.5421	-0.395663	0.130637	0.000611691	0.00462075
ADCY6	32.6246	-0.519168	0.121922	3.45738e-06	5.00837e-05
PPP2CA	25.2582	0.326586	0.124796	0.00288081	0.0166944
CAP2	26.6988	0.413229	0.127518	0.000271239	0.00228931
ZNF714	37.1824	-0.772538	0.109767	2.17661e-13	1.0545e-11
GRINA	28.4371	0.690593	0.135282	3.9506e-08	8.91584e-07
TGFBI	38.0993	-0.54711	0.17828	0.000318998	0.00262532
HTRA1	40.0629	-0.971805	0.172257	9.41399e-10	2.74745e-08
HLA-DQB1	27.7084	0.0998323	0.183337	0.426402	0.644481
EDF1	28.3948	0.586097	0.131498	1.22731e-06	2.02701e-05
APOO	30.2025	-0.155143	0.111175	0.114096	0.282886
TRDN	21.4638	0.522133	0.145038	4.7719e-05	0.000503364
PABPC4	30.8985	0.537062	0.11776	8.023e-07	1.37184e-05
CHRNB1	32.5774	0.342999	0.116801	0.00102931	0.00715107
RPLP0	27.6225	0.282575	0.144374	0.019547	0.0780915
EMX1	33.5384	-0.427971	0.129778	0.000209503	0.00182549
TSPAN9	26.2463	0.942155	0.146536	1.20325e-11	4.70108e-10
WWTR1	37.4385	0.631065	0.144326	1.59469e-06	2.53026e-05
EIF1	28.0678	0.449291	0.15682	0.000851938	0.00612367
KLHL31	25.3749	0.910886	0.151867	1.47158e-10	5.00904e-09
RPS29	27.0593	0.415203	0.156626	0.00176351	0.0110573
AGL	27.03	1.11147	0.14656	2.17288e-15	1.44865e-13
MYH4	11.9015	-0.204788	0.2684	0.132186	0.311578
PRRC2A	35.7982	0.268728	0.115768	0.00907616	0.0421447
PRRT2	33.2573	-0.39542	0.110386	8.90413e-05	0.000872052
SIGLEC16	32.6153	-0.457558	0.114846	1.3665e-05	0.000169172
SEMA6C	22.345	0.562021	0.138145	6.85035e-06	9.16786e-05
KRTAP10-10	32.4614	-0.58719	0.124446	3.27923e-07	6.1103e-06
TPM4	33.1019	-0.40162	0.132618	0.000627455	0.00472021
RGS18	31.4392	-0.169761	0.112861	0.0900128	0.240653
MLLT11	25.8428	0.923674	0.171148	7.13206e-09	1.80651e-07
NEGR1	33.0357	-0.704104	0.14053	6.26527e-08	1.37552e-06
KDM4B	31.9014	0.173929	0.131744	0.118206	0.288934
LOXL1	27.0616	0.734875	0.29672	0.000915326	0.0064768
IGHMBP2	27.1545	0.00492108	0.124754	0.963739	0.985436
MYH2	14.4584	0.731515	0.165891	9.68845e-07	1.63735e-05
RNF113A	32.9968	-0.441814	0.120862	5.02958e-05	0.000523638
LAMC1	32.6923	-0.260238	0.142521	0.028614	0.104807
ZFP36L1	28.7303	-0.305691	0.123852	0.00506109	0.0264978
RPS16	26.6728	0.443175	0.168702	0.0016493	0.0104676
PDZRN3	32.568	0.297466	0.138017	0.0109629	0.0490866
HNRNPH3	33.0115	0.0858252	0.10706	0.369529	0.589003
IGF2R	31.7512	0.492052	0.153505	0.000211098	0.00183499
MFAP4	31.033	0.0348587	0.183945	0.769048	0.882468
USP22	33.069	0.0882588	0.132235	0.429507	0.647423
ATP2B1	36.5139	0.255933	0.147445	0.0355056	0.122574
SDCBP	23.265	1.3483	0.146441	2.96348e-21	4.39502e-19
EWSR1	29.4996	-0.172563	0.112151	0.0822014	0.224655
MYOZ2	20.5474	1.0796	0.148047	2.38703e-14	1.42185e-12
HNRNPK	33.5945	0.0749931	0.109552	0.44739	0.661213
RBM24	25.3861	0.451928	0.14085	0.000249752	0.00212524
ITGA5	30.9188	-0.0727131	0.117032	0.477212	0.686063
RPL23	29.9139	0.209519	0.1361	0.0669441	0.195177
SON	31.1955	-0.0976462	0.107129	0.306727	0.528195
RBP1	29.5521	0.661346	0.13406	1.02767e-07	2.17095e-06
SLC25A19	39.5715	-1.55852	0.237592	3.58701e-12	1.52437e-10
ZYX	29.3134	0.388427	0.138396	0.00126952	0.00843292
IFI6	25.1835	0.262315	0.119199	0.012456	0.0543884
LAPTM4A	29.1688	-0.241771	0.143391	0.0430412	0.140829
ATP5PF	18.963	0.661712	0.143716	4.78303e-07	8.6679e-06
CDK2AP1	28.1988	0.155325	0.120816	0.138966	0.321921
ENO1	31.3421	0.0109895	0.112142	0.912344	0.960404
UGP2	21.8995	0.663657	0.138544	1.9071e-07	3.76601e-06
LCE2D	28.3409	0.106928	0.135341	0.342735	0.563751
OVOL1	30.8405	-0.241011	0.116276	0.0186271	0.0754043
HNRNPUL1	31.0927	0.0812277	0.108141	0.401058	0.620738
PPP3R1	25.7865	0.430665	0.121654	8.83828e-05	0.000867943
RTL1	17.2486	1.39464	0.245444	7.86181e-10	2.31303e-08
HS6ST2	29.4314	-0.0516069	0.113572	0.606093	0.783715
ATP1B4	22.0303	0.772525	0.173286	7.8096e-07	1.34166e-05
HSP90AA1	27.1034	0.258268	0.130191	0.0211316	0.0829622
CAPRIN1	27.2973	0.376602	0.116078	0.000322362	0.00264701
ILF3	33.5665	-0.105022	0.120328	0.315116	0.537088
SLFNL1	30.2708	-0.316393	0.129114	0.00468199	0.024835
JPH2	28.5099	0.703239	0.126833	3.01052e-09	8.1938e-08
HGF	29.0254	-0.166193	0.130435	0.133901	0.314296
INTS6L	31.7437	-0.90125	0.128889	2.34213e-13	1.11975e-11
SULF1	40.9428	-1.41267	0.256228	2.05458e-09	5.67704e-08
CTHRC1	41.7969	-1.27014	0.189633	1.24514e-12	5.48388e-11
H1-0	28.715	0.192724	0.147314	0.108883	0.274454
RPS6KB1	31.4731	-0.392986	0.118617	0.000230461	0.00198666
MAP2K1	22.4553	0.947317	0.13138	4.77136e-14	2.66719e-12
ACHE	29.8313	1.31619	0.16639	2.1604e-16	1.63538e-14
HMGN1	31.8203	-0.246346	0.12891	0.0263379	0.0983572
NCOR2	33.4909	-0.138181	0.109413	0.154085	0.346238
YBX3	21.9233	0.30591	0.139391	0.0100299	0.0457259
ZNF625	34.7784	-1.05266	0.122715	9.31579e-19	1.02573e-16
COX6B1	21.4096	1.19452	0.149287	1.10205e-16	8.89845e-15
ZNF417	33.6087	-0.762299	0.124004	8.42328e-11	2.97146e-09
ZNF540	30.6981	-0.351748	0.11227	0.000532185	0.00410116
CFAP410	30.4106	-0.149609	0.109657	0.124275	0.29924
ATP1A2	24.7536	0.259088	0.12533	0.0173623	0.0710829
ACTR3	27.4609	0.265469	0.126393	0.0155434	0.0649535
MCL1	29.9575	0.0343272	0.118329	0.737904	0.866993
CCT3	28.4528	0.347898	0.117898	0.000936531	0.00660114
NONO	28.1958	0.278253	0.112874	0.00582304	0.0296331
ZNF207	27.9494	-0.119754	0.105346	0.204897	0.413264
MAPRE1	30.9247	0.488309	0.112907	2.86514e-06	4.2319e-05
DIO1	29.6271	0.235895	0.256164	0.10503	0.268562
SRPK3	24.396	0.718171	0.138589	2.36379e-08	5.59533e-07
PKMYT1	26.6069	0.0595461	0.115533	0.558303	0.750772
EVL	30.9577	-0.530698	0.135705	1.50362e-05	0.000184575
PPP3CB	26.5094	0.0029632	0.106288	0.974242	0.989088
SYNCRIP	29.7006	0.175184	0.111083	0.0752961	0.211512
MSL1	29.6292	-0.135664	0.108684	0.160227	0.35445
SH3GLB1	24.0991	0.551317	0.130829	3.62645e-06	5.20818e-05
EIF3K	21.9151	0.372761	0.15527	0.00423133	0.022794
SEPTIN11	33.7966	-0.25346	0.130355	0.0238527	0.0913747
DAPK3	24.6567	0.292752	0.133982	0.0104963	0.0474063
TNNI1	26.7548	0.793948	0.131222	1.48276e-10	5.01175e-09
PTOV1	27.5478	0.332515	0.120038	0.00182679	0.0113464
TM9SF3	27.2563	-0.110812	0.11137	0.261714	0.480232
COL4A2	38.9192	-1.09723	0.165861	3.09515e-12	1.32308e-10
SOX4	36.2796	-0.689664	0.138163	8.12836e-08	1.74244e-06
CLTC	27.9634	0.00207628	0.111818	0.98376	0.992539
ARL2	29.6648	-0.536487	0.116394	6.85966e-07	1.1983e-05
CDC42	26.4779	0.25999	0.135408	0.0228087	0.0881185
PSMC1	23.0623	0.72009	0.134732	9.62793e-09	2.42097e-07
ACTN4	28.2357	-0.249605	0.124269	0.0204548	0.0807855
TMOD1	18.6137	0.778833	0.140568	2.85884e-09	7.81023e-08
SSR2	30.8635	-0.339752	0.113574	0.000926916	0.00653971
FAM83E	22.9194	0.086518	0.14705	0.462247	0.675973
ANXA5	27.8921	-0.00723352	0.114461	0.94237	0.974833
MYH10	28.3685	-0.257545	0.126722	0.0185769	0.0752919
H3-3A	28.7253	0.42956	0.167749	0.00219863	0.0133702
ANXA2	29.1764	0.178179	0.120949	0.0911196	0.242997
MPZL1	30.9234	-0.469872	0.124528	2.83016e-05	0.000321858
RELL1	29.6095	0.463141	0.129146	6.60609e-05	0.000668613
TAF15	27.3487	-0.110852	0.111777	0.261759	0.480232
CD151	23.0281	0.290636	0.127409	0.00869888	0.0409425
ADAM19	32.9953	0.410527	0.157372	0.00180459	0.011247
PSMB7	23.7187	0.147931	0.126359	0.170426	0.366633
TRIM54	22.8956	0.284736	0.133865	0.0128092	0.0556058
CCT6A	24.5785	0.382016	0.125227	0.00060271	0.00456239
NFIC	28.8808	-0.208363	0.148199	0.0808557	0.222063
CDKN2D	28.7942	-0.475946	0.122607	2.02857e-05	0.000240876
COL4A1	35.0156	-0.845418	0.132041	1.51449e-11	5.85414e-10
VDAC2	20.8349	0.60713	0.140196	2.10974e-06	3.2482e-05
SEC31A	29.1332	-0.22111	0.114859	0.0297003	0.107338
CDV3	26.6748	0.742296	0.126968	6.11345e-10	1.87453e-08
FKBP3	23.5712	0.433437	0.132735	0.000246646	0.0021062
HMGN2	26.7548	-0.194521	0.127612	0.0760551	0.212675
XRCC5	29.026	0.121075	0.119506	0.2453	0.463252
SSRP1	28.9638	-0.21162	0.118727	0.042226	0.139101
XRCC2	33.808	-0.877045	0.12463	1.59326e-13	7.87634e-12
RPL14	22.4188	0.309791	0.131978	0.00682321	0.0335866
SAP18	20.1615	0.346165	0.154521	0.00731426	0.0355775
UPK3BL1	28.0756	-0.519752	0.136582	2.0723e-05	0.000244475
ERBB2	29.9643	0.523549	0.123002	3.45975e-06	5.00837e-05
NOMO3	31.0298	0.491222	0.123719	1.20595e-05	0.000152943
ZNF500	29.684	-0.573069	0.144059	1.07582e-05	0.000137641
DDX50	28.8233	-0.355403	0.123857	0.00119388	0.00803323
UQCRC1	20.2524	0.543163	0.140373	1.73595e-05	0.000209902
LTBP4	35.8458	-0.950348	0.121373	4.13098e-16	3.03231e-14
XIRP2	18.7781	0.373357	0.258531	0.0251027	0.0951599
EID1	25.0316	0.367499	0.13787	0.00221972	0.0134647
RNF187	26.9675	0.453246	0.123691	5.2445e-05	0.000542131
SLC38A2	30.2164	-0.575565	0.158193	3.70462e-05	0.000409141
PDXDC1	30.7396	-0.377516	0.11662	0.000341681	0.00278363
TNIP1	26.1763	0.60976	0.1486	4.71055e-06	6.60842e-05
PXN	27.8048	-0.116319	0.130617	0.289816	0.510321
NRBP1	26.5607	-0.186536	0.116768	0.0683971	0.198499
CBX5	31.6948	-0.27874	0.117382	0.00756295	0.0366156
RGS2	23.7399	1.369	0.189453	4.65265e-14	2.62099e-12
CSPG4	25.0574	0.206225	0.126963	0.0575567	0.174824
NBPF19	34.7893	-0.907556	0.125636	6.4889e-14	3.54547e-12
SNRNP70	28.5735	-0.396748	0.131854	0.000659094	0.00493777
RASSF4	28.7526	0.0318041	0.129704	0.770712	0.883401
SEPTIN2	28.9911	0.103891	0.108313	0.282797	0.501852
AGO2	27.3555	0.381002	0.124993	0.000574789	0.00439683
RPLP1	20.5843	0.643752	0.192701	0.000102225	0.000981337
NPLOC4	26.94	0.334998	0.120653	0.00182267	0.011341
CTSD	23.7655	0.0646622	0.12184	0.537684	0.735986
ACADVL	25.9168	-0.523041	0.15244	8.6134e-05	0.000848151
TLK2	28.151	-0.154048	0.110915	0.117861	0.288285
CCS	30.5308	-0.241474	0.113379	0.0163389	0.0676551
PCOLCE	38.844	-1.47027	0.132182	5.86612e-30	4.26291e-27
CAVIN4	21.881	0.744461	0.141479	1.49526e-08	3.65162e-07
HNRNPR	28.5328	0.118612	0.122068	0.259585	0.478464
ASPH	27.4332	-0.234321	0.123726	0.0296498	0.107338
MMP2	39.695	-2.00388	0.180729	1.72273e-29	1.10437e-26
SEMA6A	32.9277	0.429896	0.12746	0.000167561	0.00150701
SND1	29.3225	-0.276525	0.122617	0.0100579	0.0457961
SLC36A4	26.6412	-0.0668657	0.117288	0.51157	0.715883
MAP3K13	29.6583	-0.278596	0.113476	0.00585537	0.0297351
RPS15A	25.9633	0.357145	0.139613	0.00305379	0.0175015
ANGPTL1	24.9652	0.129841	0.145612	0.266788	0.485371
NUCB1	28.1209	-0.474641	0.117666	1.11067e-05	0.0001416
PLEKHA4	29.2523	-0.187097	0.111828	0.0595901	0.179091
NUDC	23.528	0.265632	0.125436	0.0149862	0.0632801
C4orf3	26.2147	0.5516	0.133784	6.11161e-06	8.3116e-05
SACS	24.5834	0.565501	0.136357	4.77801e-06	6.69014e-05
USP9X	25.1259	0.16041	0.135589	0.153525	0.3453
QARS1	23.4212	0.0793609	0.114574	0.431881	0.649789
FUBP1	26.5907	-0.001234	0.104964	0.987842	0.994411
UQCRHL	22.0309	0.401015	0.139075	0.000896959	0.00639467
FSCN1	32.7407	0.0864277	0.116464	0.399764	0.619215
KCNH3	27.3981	-0.661227	0.133666	9.44068e-08	2.00601e-06
SMAD7	25.719	-0.0925123	0.115982	0.362957	0.583636
ITGA7	20.2123	0.340948	0.13774	0.00383025	0.0210389
EIF3E	22.9997	0.300518	0.156597	0.0195156	0.0780089
RAB2A	21.6987	0.439528	0.140561	0.000359464	0.00289925
POLR2A	30.6273	0.0374247	0.108878	0.699775	0.841765
EIF3F	21.0316	0.135786	0.144561	0.250313	0.468109
SPON2	32.9139	-0.84884	0.268793	0.000119713	0.00112689
PSMD3	20.9056	0.422368	0.139006	0.000505742	0.00391815
RNF11	22.6457	0.309956	0.133535	0.00701154	0.0343348
ZNF768	30.0851	-0.416946	0.124222	0.000168028	0.00150828
CCT7	18.6477	0.458978	0.151064	0.000447638	0.00351674
BOC	39.3533	-1.49038	0.155943	1.72893e-22	3.06443e-20
NUDT8	27.2913	0.170575	0.214315	0.201845	0.409201
MTRNR2L1	26.9015	-0.135449	0.22548	0.273204	0.491916
TEAD4	23.0142	0.738478	0.130396	1.59609e-09	4.46108e-08
NEFM	28.6058	1.21255	0.152235	1.52226e-16	1.17684e-14
SRSF9	26.7468	-0.516764	0.129402	1.17408e-05	0.000149161
SF1	26.9771	-0.0490275	0.111695	0.621002	0.793594
PPP2R3B	26.1341	1.00978	0.156478	1.02738e-11	4.03565e-10
UBE2H	27.119	0.270144	0.138525	0.0212755	0.0834249
ADPRS	26.5002	-0.677198	0.122337	4.02211e-09	1.08254e-07
DDR1	28.3115	0.372848	0.126575	0.000829724	0.00599364
CSTF3	28.0988	-0.198043	0.112632	0.047095	0.149975
NYAP1	29.5911	-0.596709	0.12815	4.14283e-07	7.60251e-06
HLA-DQB2	27.2901	-0.170892	0.120957	0.103197	0.26564
RAD21	26.693	0.25398	0.126314	0.0199972	0.0795299
CCNG2	28.9168	0.410527	0.124048	0.000232805	0.0020045
MAP7D1	22.2602	0.291209	0.13841	0.0135546	0.0582847
MYLK4	26.7152	-0.466179	0.127756	4.83699e-05	0.0005077
ADPRHL1	17.7492	0.62058	0.151932	5.48909e-06	7.56911e-05
NDUFS2	19.8966	0.466838	0.14083	0.000164816	0.00148416
BRD4	29.4852	0.180451	0.125239	0.0922307	0.244613
CCDC51	8.87661	0.172865	0.17181	0.17744	0.37696
PDHA1	19.3219	0.435803	0.141545	0.000418253	0.00332907
SUPT5H	27.4413	0.329922	0.117727	0.0016627	0.0105343
RPS10	22.6229	0.544416	0.182884	0.000432933	0.00342342
RCC2	26.9232	-0.476327	0.12711	3.46658e-05	0.000385303
ECPAS	25.7703	0.219211	0.121696	0.0381437	0.129649
MATR3	24.926	0.148536	0.128638	0.176273	0.375652
MYL2	8.1512	0.214655	0.196779	0.115497
RHOC	21.484	0.166642	0.147156	0.164011	0.358996
KLC1	24.8968	0.22772	0.135018	0.0464563	0.148984
NOTCH2NLA	32.8421	-0.688021	0.124608	4.0503e-09	1.08611e-07
RAB1B	21.7679	0.208156	0.138888	0.0739733	0.209006
MAT2A	23.2935	0.0320392	0.116199	0.753077	0.873881
CLEC3B	15.9487	0.671033	0.173787	1.06414e-05	0.000136869
BGN	35.6641	-2.13713	0.227849	9.29748e-22	1.43755e-19
PNISR	26.9507	-0.163155	0.113569	0.102953	0.265257
RPS21	23.3462	0.591011	0.155054	1.9163e-05	0.000227917
CCN2	27.543	0.556925	0.15414	4.03786e-05	0.000441836
SEC61A1	30.6952	-0.359084	0.125064	0.00121278	0.00813532
REPIN1	26.5884	0.38465	0.134802	0.00112126	0.00765087
ANTXR1	29.3175	-0.691929	0.141947	1.14182e-07	2.38436e-06
H3C13	25.4359	-0.393201	0.139318	0.00126158	0.00839555
PSMD1	23.708	-0.00545659	0.118809	0.957402	0.982412
ADAMTS9	36.0383	-1.01996	0.178032	7.47799e-10	2.23632e-08
DST	26.1439	-0.0779489	0.111208	0.427243	0.645483
SEC62	26.8715	-0.274214	0.118193	0.00869553	0.0409425
CUX1	23.8514	0.400282	0.13824	0.000891854	0.00636651
TIMP2	33.301	-1.33001	0.159624	1.06133e-17	1.01482e-15
SLC25A5	21.4528	0.569635	0.142581	9.6436e-06	0.000125143
MYOM2	20.6269	1.15045	0.15766	1.69005e-14	1.04971e-12
MRPS16	26.4838	-0.122276	0.117452	0.233446	0.448713
DCTN2	22.8752	0.311942	0.133174	0.00672855	0.0333024
KCNAB3	24.5351	-0.70148	0.129311	6.91524e-09	1.76327e-07
CYP2W1	23.7167	0.134045	0.117553	0.189877	0.394127
EPB41L3	22.8033	1.28106	0.141267	9.0072e-21	1.21214e-18
HLA-DRB1	23.9171	-0.138343	0.12598	0.199046	0.40597
GANAB	29.2324	-0.363198	0.127169	0.00121897	0.00815678
TRIR	25.0079	0.179081	0.130356	0.107221	0.271585
DAG1	24.608	0.397162	0.140301	0.00113224	0.00770414
NFKB2	24.6521	0.0560679	0.129424	0.607991	0.785075
H3-3B	23.9121	-0.10313	0.13727	0.366654	0.58699
IGFBP7	25.5155	-0.0384399	0.1673	0.746679	0.87044
BRD3	28.6024	0.128409	0.113899	0.200096	0.407083
UBA1	25.1729	-0.00758242	0.109717	0.937655	0.972032
ATP5PD	18.5804	0.674144	0.177151	1.49086e-05	0.000183318
HSPB3	21.8422	0.977837	0.14604	2.43326e-12	1.05883e-10
XRCC6	26.2136	0.369716	0.120831	0.000629189	0.00472835
GIT2	26.045	0.0289215	0.117932	0.779772	0.888701
TMEM170A	28.0763	-0.669508	0.136824	1.05896e-07	2.23057e-06
NNAT	24.0282	0.269848	0.158747	0.0342866	0.119731
GCNT2	18.2397	0.740832	0.376185	0.00262755	0.0154987
KLHL40	20.8063	0.705666	0.159727	1.0083e-06	1.69222e-05
SERINC1	24.7595	0.454125	0.132261	0.000114373	0.00108505
PGRMC2	26.3373	0.284386	0.125074	0.0088834	0.0415149
PRDX6	23.6384	0.766084	0.144794	1.34615e-08	3.32736e-07
ANTXR2	27.5865	0.245023	0.125044	0.023728	0.091041
C1S	21.261	0.442837	0.246854	0.00978819	0.0448492
EMP3	22.7813	0.180182	0.13425	0.108075	0.272892
HMX1	24.7198	-0.194752	0.12692	0.0731415	0.207383
PARK7	22.9618	0.10355	0.116706	0.311789	0.533665
ARL6IP4	21.522	0.0562061	0.122566	0.596299	0.777569
CDK16	22.0783	0.074637	0.117321	0.465841	0.678763
PRDX1	22.0568	0.229109	0.126067	0.0353571	0.122214
PCM1	23.6543	-0.0999237	0.111393	0.31116	0.533172
KCNE5	18.8239	0.96776	0.168068	6.49185e-10	1.9739e-08
COL5A3	20.5567	0.682686	0.180867	1.77434e-05	0.000214188
EIF3L	22.7384	0.346627	0.12992	0.00236533	0.0141356
ITFG1	25.919	0.0304699	0.117089	0.764796	0.879952
LRP1	36.8528	-1.1121	0.141337	3.53936e-16	2.6516e-14
SAAL1	24.2157	-0.275957	0.120794	0.0094055	0.0433967
NCBP2	26.6521	-0.623963	0.14161	1.39474e-06	2.25235e-05
MORF4L2	24.7564	0.248189	0.120839	0.0190747	0.0768805
KIF5B	23.9433	0.683288	0.139123	1.01626e-07	2.1531e-06
BSG	23.529	0.0298743	0.125557	0.782499	0.889656
C16orf78	23.8681	-0.227569	0.122071	0.0319948	0.113812
CD99	24.3243	0.0718641	0.111902	0.468357	0.680982
TFG	23.1959	0.00178827	0.123957	0.986648	0.993759
CHRNG	23.9368	-0.067306	0.13339	0.541433	0.738475
ZNF346	25.7705	-0.381708	0.125726	0.000620806	0.00467502
PBX2	25.703	0.00902733	0.10848	0.926326	0.965505
CHTOP	22.2046	0.131866	0.11815	0.199925	0.406847
MPRIP	25.2482	0.3334	0.122677	0.00212876	0.012995
ATP5MF	15.7583	0.746205	0.175979	2.51579e-06	3.76953e-05
ZNF707	28.8506	-0.490879	0.136282	5.14998e-05	0.000533879
MTCH2	23.3627	0.111147	0.115597	0.27194	0.490682
YME1L1	25.4634	0.0213149	0.110415	0.828437	0.916282
AFF4	25.8336	-0.00241155	0.109954	0.979977	0.991299
ATP2B4	25.024	-0.520891	0.139348	2.99532e-05	0.00033916
ANKRD17	24.8289	0.132509	0.117524	0.196629	0.402734
TBCA	22.1011	0.819287	0.143521	1.11416e-09	3.21295e-08
ATXN2L	24.9182	-0.0763465	0.111626	0.439419	0.655431
DNAJA4	17.1525	0.874087	0.1517	7.0045e-10	2.10337e-08
ARHGAP23	27.7214	0.504266	0.121962	6.00327e-06	8.20033e-05
TRIM72	21.3155	0.664332	0.148731	9.24394e-07	1.5732e-05
PPP1R12B	20.4605	0.588998	0.140913	3.89797e-06	5.57609e-05
WDR44	24.6222	0.57225	0.129831	1.57783e-06	2.51403e-05
SYPL2	15.4456	0.462803	0.176853	0.00141083	0.00919999
TTC3	30.4129	-0.620435	0.135352	6.44105e-07	1.12788e-05
SPTB	22.4608	0.977752	0.176204	1.78161e-09	4.96052e-08
TSPAN3	24.1681	0.14874	0.126682	0.170337	0.366549
PRRC1	22.0371	-0.00317881	0.114133	0.974397	0.989088
CAPZB	22.5376	0.0683099	0.121223	0.514773	0.718429
THRAP3	25.2885	-0.324237	0.123039	0.0027935	0.0163581
SENP3	26.1339	-0.434793	0.127141	0.000134465	0.00124796
MAPK1	20.8662	0.329689	0.14169	0.00633733	0.0318488
RUSC2	28.2288	0.226858	0.120333	0.0309264	0.110765
PFDN5	16.8768	0.343007	0.147722	0.00581295	0.0296025
TSC22D1	26.7711	-0.428834	0.160268	0.00151561	0.00979016
TACC2	23.3528	0.388037	0.140744	0.00144248	0.00937613
TUFM	20.9521	0.462876	0.141472	0.000208828	0.00182179
CARD11	20.7731	-0.138207	0.124752	0.194683	0.400548
CLIC4	22.915	0.03618	0.12563	0.736551	0.866243
TSPAN13	18.9576	0.506622	0.159171	0.000239189	0.00205459
CRABP2	24.6541	-0.678199	0.132814	4.19256e-08	9.40351e-07
PIK3R1	25.2414	0.216354	0.118898	0.0370474	0.126992
FAM20C	27.03	-0.347487	0.130632	0.00231245	0.0139342
NUTF2	21.0678	0.451784	0.150974	0.000572578	0.00438453
DYSF	20.8781	0.359458	0.149303	0.00426791	0.022957
RPL10L	25.7296	0.0619323	0.113893	0.538135	0.736326
MED13	23.062	0.030863	0.110342	0.753527	0.873904
MGP	26.4302	-1.13971	0.146959	1.1321e-15	7.98738e-14
TUBB2B	24.3244	0.425178	0.148101	0.000915034	0.0064768
DAOA	25.0617	-0.480109	0.13988	0.000106212	0.00101558
SGCD	21.7051	0.0907412	0.116713	0.374301	0.592731
ARPC2	22.6224	-0.0508603	0.113055	0.609767	0.786087
ANAPC5	25.6856	-0.338152	0.130224	0.00288038	0.0166944
MYO1C	25.3396	0.263183	0.123738	0.0145443	0.0617009
IPO5	23.711	0.428293	0.12635	0.000146492	0.00134075
FKBP1A	22.5279	0.714168	0.160662	9.7379e-07	1.63975e-05
TOMM7	17.7616	0.352898	0.154053	0.00623436	0.0313964
CCT5	21.4962	0.45154	0.139886	0.000259518	0.00220318
ZNF669	25.9033	-0.588967	0.130311	8.85097e-07	1.50986e-05
GGA2	23.0815	0.66059	0.136408	1.66203e-07	3.32727e-06
KLHDC3	20.2641	0.236509	0.131012	0.0352898	0.12214
ERMARD	42.5391	-2.49025	0.150657	8.97085e-62	3.25956e-58
CCT8	21.8578	0.366876	0.137131	0.00209042	0.0127763
CNN2	28.8078	-0.137759	0.137109	0.227323	0.440728
APLP2	24.142	0.353503	0.137345	0.00279925	0.0163785
NDUFS3	18.2901	0.447553	0.183711	0.00262072	0.015471
SFRP2	31.9499	-1.48796	0.184439	1.15507e-16	9.22404e-15
DDX39B	25.2799	-0.150568	0.134905	0.1824	0.384092
PUF60	27.5803	-0.201054	0.112636	0.0436579	0.142079
ZHX3	26.8417	-0.784281	0.126809	7.06681e-11	2.5423e-09
ARHGEF2	26.2734	0.0583918	0.110553	0.552165	0.747084
BICD1	27.0688	-0.554309	0.12633	1.60737e-06	2.54482e-05
RPS26	20.2068	0.217532	0.14463	0.0699319	0.201186
TGFB2	33.1842	-1.29979	0.182535	9.14963e-14	4.81814e-12
UBE2V2	22.5067	0.267642	0.136017	0.0206866	0.0816123
ATP1B3	21.9772	0.759543	0.145867	1.8471e-08	4.42999e-07
NUMA1	29.0015	-0.1825	0.126666	0.0929473	0.245739
MAP3K7	24.6735	-0.239466	0.128756	0.0302528	0.108728
SRSF3	22.9399	-0.266989	0.134467	0.0205933	0.081288
SBDS	20.5464	0.537724	0.144058	3.03041e-05	0.000341956
GPR87	22.4052	0.0830431	0.144355	0.471349	0.683691
GNB2	22.6248	0.203967	0.147825	0.0921842	0.244579
FBLN1	32.6965	-1.53304	0.14405	8.63518e-28	3.69128e-25
UQCR11	14.412	0.848014	0.162827	1.7513e-08	4.24222e-07
ZC3H11A	24.3112	-0.241733	0.120012	0.0216314	0.0846045
TUBA4A	14.9831	0.396124	0.156169	0.00251171	0.0149122
FNBP1L	23.8226	0.239445	0.117579	0.0203756	0.0805952
PTN	24.2913	0.0573345	0.147201	0.620359	0.793218
LAMB2	23.719	-0.117743	0.118027	0.250089	0.467919
NPEPPS	23.9918	0.183373	0.118166	0.0748887	0.210773
FGFRL1	23.7674	0.863028	0.136212	2.11558e-11	8.09153e-10
AP3D1	22.8837	-0.10234	0.124334	0.335995	0.557079
UBR4	23.9471	-0.17678	0.123522	0.0970022	0.253885
PRRX1	32.7627	-1.53629	0.143562	1.51485e-27	6.11578e-25
PCID2	20.5808	-0.303078	0.139598	0.0104806	0.0473814
RPS7	20.8419	0.395565	0.13968	0.0011604	0.0078449
AP2M1	20.2996	-0.0482168	0.121526	0.646836	0.809656
DPYSL3	22.0992	-0.122418	0.127836	0.261336	0.479699
TAGLN2	17.6243	0.0577522	0.140373	0.616806	0.791248
IDH3B	18.9797	0.38966	0.144908	0.00172384	0.0108742
SH3BGR	13.4526	0.579209	0.168837	7.63224e-05	0.00076396
RARA	22.6765	0.0220724	0.116576	0.82965	0.916829
SGCB	22.8647	0.167168	0.11923	0.107023	0.271367
NPIPB3	25.9268	-0.672575	0.138982	1.36171e-07	2.78748e-06
LGMN	22.9753	0.357512	0.177757	0.010424	0.0472558
KPNA3	23.5625	-0.0463816	0.135802	0.6773	0.825967
SEMA3C	21.0066	0.0705197	0.128404	0.518338	0.720778
GPI	22.4749	0.102108	0.132635	0.35639	0.576941
MAPKAPK2	22.21	0.478502	0.136299	7.97613e-05	0.000791838
FITM1	16.0623	0.257789	0.141963	0.0296792	0.107338
ZFHX4	30.158	-0.849427	0.121178	2.124e-13	1.03591e-11
ITGAV	21.0075	-0.0520155	0.127025	0.628676	0.798032
CD276	25.0255	0.0514556	0.109971	0.599582	0.779076
SPATS2L	24.0743	-0.122282	0.113866	0.224457	0.437299
ADNP	25.7684	-0.234643	0.127558	0.0324558	0.114772
RPL39	17.733	0.607042	0.152563	9.76549e-06	0.000126499
RALY	22.9808	0.459032	0.137809	0.000160875	0.00145589
GALNT2	25.8908	-0.252029	0.123765	0.0188574	0.0760891
RAB7A	20.62	0.538076	0.139776	1.78764e-05	0.000215079
CCT2	22.8713	0.359334	0.129391	0.00153781	0.00992473
MCAM	22.7896	0.10998	0.136411	0.327804	0.549516
SEMA6B	24.9583	-0.00854297	0.136928	0.939073	0.972878
NCOA1	21.7545	0.240628	0.12827	0.0288864	0.105473
POLR2L	17.1498	0.676666	0.169831	8.27161e-06	0.000108895
COPA	26.4203	-0.376395	0.129134	0.000957908	0.00671274
RBM39	24.9032	-0.155686	0.116932	0.128193	0.305035
ZNF684	25.2232	-0.0922553	0.113234	0.356677	0.577019
CXXC5	22.6936	0.0672168	0.111547	0.49623	0.701303
FURIN	24.2796	0.308238	0.141797	0.0102584	0.0465342
COL11A1	38.7124	-2.09133	0.261134	3.35981e-17	2.96787e-15
TCF4	22.2422	-0.0761963	0.124196	0.473856	0.685531
PSMA7	21.1944	0.510242	0.143671	6.35503e-05	0.000646806
G3BP1	23.5394	0.171773	0.130322	0.119787	0.291401
LHFPL6	24.0878	-0.312453	0.126416	0.00475602	0.0251543
ILRUN	19.1072	0.321914	0.13627	0.00584806	0.0297288
CDH11	33.411	-1.09523	0.144123	1.97122e-15	1.32637e-13
RALA	22.5434	0.220248	0.129268	0.0455764	0.14681
NECTIN2	22.4504	0.366751	0.131805	0.00143588	0.00934157
CNBP	18.9174	0.430872	0.135136	0.000300147	0.00248708
EPN1	22.7625	0.151392	0.126815	0.161022	0.355128
SOD1	16.0632	0.803689	0.147142	4.94221e-09	1.30127e-07
CASP2	23.8403	-0.495967	0.134939	4.35456e-05	0.000468115
JAM2	22.4976	0.947645	0.132974	9.99203e-14	5.22389e-12
WAC	23.1972	0.016244	0.111591	0.869721	0.939118
NCS1	25.684	0.371803	0.127629	0.000970935	0.00679094
SRSF2	24.5755	-0.0668342	0.120679	0.524297	0.725939
ZNF208	26.8041	-0.22412	0.119821	0.0321565	0.114158
TCAF1	22.9541	0.621046	0.12921	2.01573e-07	3.94834e-06
PSMB5	19.6031	0.373207	0.141458	0.00223025	0.0135173
TACC1	22.3887	0.154881	0.124681	0.146962	0.335358
COX4I1	16.6913	0.659268	0.163439	6.68882e-06	9.00141e-05
WASHC1	23.686	-0.498851	0.133265	3.22744e-05	0.000360828
ATP5MG	18.2244	0.420057	0.157913	0.00174281	0.0109559
POU5F1	24.7632	-0.566565	0.138825	6.11904e-06	8.3116e-05
FERMT2	20.5034	0.0628278	0.118674	0.543153	0.739711
TOMM20	22.1036	0.334329	0.129777	0.00323177	0.0182907
GSTP1	21.9489	0.0851205	0.121326	0.4199	0.637837
TXNDC5	25.9395	-0.446864	0.129807	0.000120292	0.0011294
NCAM1	24.3792	0.199117	0.141237	0.0866081	0.233797
PNPLA2	15.7674	0.125273	0.133933	0.261037	0.479393
CSNK2B	20.4561	0.112889	0.129593	0.303803	0.525151
KIR3DL1	23.536	-0.609013	0.132255	5.33007e-07	9.49354e-06
FAU	19.2465	0.528449	0.186632	0.000678345	0.00505593
PDIA6	24.9712	0.258882	0.12289	0.0154634	0.0647307
RPS25	20.3296	0.23629	0.154777	0.0594124	0.178778
NDUFA4	15.6757	0.51354	0.177162	0.000588274	0.00448112
COX6A2	16.4816	0.620155	0.156731	8.86317e-06	0.000116261
COL24A1	17.3807	0.193203	0.167636	0.129884	0.307549
ATP5IF1	19.6285	0.175065	0.146937	0.140757	0.324302
ARHGEF40	28.0192	-1.15765	0.17046	1.11525e-12	4.97211e-11
MICALL1	24.8962	0.531811	0.128359	5.18678e-06	7.1932e-05
AKAP13	23.4355	0.265613	0.127493	0.0161811	0.0671548
MBD3	22.7105	-0.00789254	0.116191	0.937848	0.972093
MYMK	22.2445	0.807078	0.138069	4.78246e-10	1.50451e-08
ANKRD1	17.95	0.0472861	0.176978	0.694357	0.839164
HSPB2	16.1696	1.16881	0.176173	2.62045e-12	1.1335e-10
LMOD3	16.8454	0.72424	0.150603	1.61154e-07	3.23509e-06
HEATR5A	22.3944	-0.0048959	0.125108	0.962788	0.98474
SLC7A5	21.9473	0.554483	0.170401	0.00015577	0.00141321
CSRNP2	21.7534	0.0125902	0.118527	0.903016	0.957502
CHMP6	24.123	-0.322225	0.131774	0.00475197	0.0251543
ELN	29.4625	-1.30219	0.151744	8.0611e-19	9.15313e-17
PLXNB2	26.723	-0.138198	0.113489	0.165716	0.361231
DLD	17.8726	0.138519	0.12898	0.20389	0.411919
PLOD1	26.458	-0.631387	0.12783	1.07163e-07	2.25073e-06
LMOD2	15.1671	0.647207	0.166523	1.10587e-05	0.000141237
OAZ2	19.8868	0.525001	0.14608	5.09194e-05	0.000528616
TLE3	23.9647	0.144788	0.118412	0.161394	0.355518
MAMDC2	19.2551	1.03986	0.16838	6.31937e-11	2.30928e-09
TM7SF3	22.5888	-0.0668052	0.113073	0.502988	0.707689
WIPF3	21.6599	1.20412	0.143411	3.43451e-18	3.5153e-16
PTP4A1	18.0121	0.177266	0.132922	0.112492	0.280342
H4C5	23.0421	-0.266633	0.162028	0.0413174	0.136728
PARVA	23.4772	0.115738	0.114228	0.25032	0.468109
ZNF350	22.7359	-0.485265	0.14399	0.000135257	0.0012535
U2AF2	22.6863	-0.177974	0.121614	0.0914929	0.243278
NDUFV2	20.53	-0.354019	0.14371	0.00392994	0.0214567
RAB11B	19.9246	0.203722	0.136996	0.0754551	0.211793
CD9	18.1285	0.0296822	0.142641	0.796139	0.896844
CALM1	20.9704	0.273396	0.138636	0.0202139	0.0802262
ARID1A	24.7754	-0.0702267	0.11616	0.488577	0.696201
EXOSC6	22.9697	-0.445464	0.141273	0.000316755	0.00261278
STARD7	21.1219	0.800571	0.139785	1.05801e-09	3.07542e-08
ABLIM3	22.8832	0.35502	0.133918	0.0023248	0.0139833
KTN1	20.3317	0.245642	0.142339	0.0374464	0.127937
PHLDB1	21.8805	-0.395182	0.131299	0.00067521	0.00503811
GHITM	17.3491	0.475495	0.147973	0.000243268	0.00208225
MTDH	21.8306	-0.087449	0.122735	0.406049	0.625134
FEM1B	17.6544	0.403056	0.142306	0.00111841	0.00764483
XIRP1	18.0677	0.814477	0.150688	5.71872e-09	1.48953e-07
RBM8A	21.2954	0.61518	0.151645	6.8047e-06	9.12357e-05
WLS	21.4168	-0.0592266	0.120545	0.569157	0.759608
SPG7	24.695	-0.703883	0.12958	6.08025e-09	1.56142e-07
SMIM40	23.2549	-0.492617	0.129883	2.59399e-05	0.000299214
MEF2D	18.884	0.387953	0.139962	0.00135609	0.0088781
PPIAL4F	19.9952	0.011899	0.125341	0.912337	0.960404
MLLT6	21.6776	0.150557	0.125453	0.159542	0.353617
GLIPR2	23.0125	0.392291	0.173625	0.00569354	0.0291518
BAG3	14.2137	0.164206	0.154358	0.178756	0.378833
TMEM182	18.1757	1.23773	0.155102	1.05276e-16	8.69367e-15
EBF1	21.976	-0.307974	0.137216	0.00840519	0.0399741
RGMB	21.82	0.140758	0.13511	0.211957	0.42073
SNRNP200	22.3816	0.079275	0.115112	0.434123	0.6518
SEC63	21.5595	-0.071535	0.114268	0.476988	0.686063
UPK3BL2	24.1855	-0.533458	0.133368	9.36017e-06	0.000121682
LUM	17.6395	0.0644226	0.141343	0.572373	0.762081
BANF1	19.8354	0.470963	0.146746	0.000239722	0.00205674
SF3B1	24.319	-0.552975	0.138706	1.07122e-05	0.000137293
SESN3	24.2986	-0.0336597	0.118248	0.743077	0.869449
CORO1C	21.8426	-0.0304995	0.118765	0.767092	0.881045
DNMT3A	23.6482	-0.0795023	0.117447	0.43785	0.654581
GORASP2	19.6885	0.178612	0.123097	0.0931844	0.246065
PDAP1	16.795	0.466822	0.150005	0.000358307	0.00289313
U2AF1	23.5844	-0.109281	0.134399	0.331927	0.552643
MYO18A	20.3594	0.286944	0.138135	0.0140459	0.0600773
ARPP21	23.8735	0.310482	0.142383	0.00990656	0.0452825
FNDC3A	21.8563	-0.158496	0.135737	0.161631	0.355823
EIF3B	23.1776	0.254858	0.122847	0.0173108	0.0709516
TCEAL9	22.1153	0.188259	0.119954	0.0720803	0.205899
BACH1	22.4845	-0.160535	0.118785	0.121642	0.294755
PAM	21.2446	-0.257728	0.130267	0.0212839	0.0834249
RRAD	14.8783	0.581726	0.176808	0.000122839	0.00115183
CTSA	19.3009	-0.0533958	0.127485	0.620472	0.793218
CALM2	17.6947	0.0702887	0.128142	0.518705	0.721008
UBE2L3	19.8317	0.182673	0.128482	0.0946868	0.249127
PABPN1	21.1562	-0.187621	0.126147	0.0826483	0.225622
EIF4G3	20.605	-0.0316481	0.12193	0.762402	0.879146
NPC2	21.9482	-0.0380328	0.114741	0.705874	0.846746
ZBTB7B	21.9237	-0.5744	0.130199	1.57187e-06	2.51403e-05
PSMC3	20.2338	0.484384	0.160614	0.000437973	0.00345951
ACAA1	20.7837	-0.305017	0.135554	0.0087141	0.0409425
PRKDC	23.0677	-0.0894363	0.120319	0.390427	0.610811
SRP68	18.9916	0.21262	0.12901	0.053801	0.165877
FLNA	27.477	-0.859871	0.14528	3.06938e-10	1.00474e-08
TCEAL8	20.6456	0.309271	0.132692	0.00690831	0.033933
LRP6	20.107	0.34034	0.150506	0.00645098	0.0322194
PBX1	20.5575	-0.271343	0.135394	0.0188296	0.0760193
AHDC1	23.0903	-0.0272467	0.111315	0.782182	0.889656
ITGA4	24.3371	-0.0490662	0.130437	0.65431	0.813578
EIF4EBP2	19.8993	0.395159	0.142783	0.0013449	0.00881283
OR56A4	24.0044	-0.284005	0.132848	0.0126151	0.0548617
SOX11	24.4145	0.670289	0.140194	2.03853e-07	3.98225e-06
GNL3L	23.0699	-0.0399853	0.111968	0.68668	0.832844
ATP2A3	15.3072	0.295594	0.172587	0.0275857	0.101811
DIO3	22.3936	-0.0431773	0.114938	0.668763	0.820362
RHOQ	23.0123	-0.110544	0.114388	0.272449	0.491165
KIAA1614	21.337	-0.484618	0.131241	4.18216e-05	0.000452404
NPFF	22.6545	-0.207037	0.123133	0.0518268	0.161434
KANK3	20.099	-0.343196	0.134083	0.00316739	0.0180105
MXD4	19.8192	-0.272809	0.133044	0.0165625	0.0684641
CCDC80	26.7616	-0.707268	0.167377	1.87512e-06	2.92414e-05
PRMT2	22.0547	-0.10729	0.119624	0.30194	0.5233
CASP12	21.1135	-0.531907	0.13736	1.88353e-05	0.000224756
SDC2	17.6469	0.709367	0.155023	5.71047e-07	1.00968e-05
ATXN7L3	22.3589	0.118233	0.115644	0.243212	0.460027
BRD2	22.9615	-0.0535349	0.11628	0.59849	0.778559
BMPR2	23.6869	-0.183826	0.123584	0.0848473	0.230585
ACIN1	23.0862	-0.139009	0.123656	0.193654	0.399229
NID1	25.1433	-0.557521	0.130115	2.64481e-06	3.93522e-05
FARP1	21.3826	-0.00455438	0.11826	0.964203	0.985494
DNAJB2	21.3471	0.0154551	0.123123	0.884528	0.947398
PPP5C	20.1217	0.301021	0.143475	0.0122068	0.0535025
ASB5	12.5016	0.341433	0.179397	0.0147979	0.0626304
MYO18B	19.5511	0.101839	0.132302	0.355849	0.576322
SDHA	19.9284	-0.241785	0.131489	0.0312117	0.111457
LRRC27	24.1465	-0.317994	0.133244	0.00548919	0.0282707
EIF3M	19.0816	0.388484	0.137338	0.00115266	0.00780652
BCLAF1	21.0774	-0.124283	0.117819	0.22726	0.440728
DNAJA1	18.3124	0.630427	0.153456	5.04198e-06	7.04617e-05
EMC1	22.383	-0.0060057	0.116648	0.952542	0.979916
MRC2	24.5047	-0.590824	0.158545	2.60813e-05	0.000300369
KDELR1	22.2989	0.144321	0.126498	0.18208	0.38353
CBWD2	23.0533	-0.382129	0.153351	0.00309632	0.0177192
SULF2	31.7465	-1.34027	0.133698	1.39786e-24	3.90701e-22
PDE4D	22.0917	-0.563712	0.136518	5.25137e-06	7.2689e-05
RAB18	18.414	0.368085	0.140278	0.00238858	0.0142394
DGCR6L	15.8021	0.393239	0.172323	0.00509696	0.026628
ARL6IP5	16.8928	0.371381	0.147064	0.0030523	0.0175015
NDUFV1	17.2462	0.254816	0.147537	0.0352169	0.122042
HSPA4	20.1799	0.539579	0.14379	2.446e-05	0.000285314
KIAA1549	22.4237	0.449095	0.125916	7.22812e-05	0.000727517
CTDSP2	23.9109	-0.404958	0.142475	0.00111932	0.00764483
EGLN3	20.0092	0.660266	0.149954	1.2689e-06	2.07215e-05
HECTD1	22.7652	-0.008451	0.117984	0.933791	0.969547
LAMA4	28.1963	-1.03058	0.169199	1.18015e-10	4.10342e-09
BBLN	22.3233	-0.25949	0.122431	0.0154135	0.0646335
WDR5	21.9746	0.00926522	0.120739	0.930027	0.967713
SLC39A3	23.4323	-0.319148	0.126013	0.00384596	0.0211092
RBBP4	18.7223	0.1564	0.126133	0.14755	0.336128
NPAP1L	25.1561	-0.416881	0.130627	0.000321911	0.0026463
PSMB2	18.7779	0.176606	0.134222	0.118787	0.290062
DYRK2	22.4164	0.105724	0.11626	0.299235	0.520424
GLG1	25.5179	-0.122036	0.131781	0.267365	0.485978
ACTN1	20.8559	-0.379522	0.138914	0.00162315	0.0103833
ATP6V1G1	16.6686	0.455089	0.164215	0.00109784	0.00754253
HP1BP3	23.0134	-0.492991	0.140363	7.80724e-05	0.000776824
IL17B	18.1634	1.33359	0.162849	1.96031e-17	1.7807e-15
AZIN1	18.5064	0.344645	0.145597	0.00519069	0.0270206
FXR1	19.1132	0.490186	0.145512	0.000126838	0.00118171
GDI2	20.8094	-0.120129	0.119164	0.245477	0.463467
PKD1	24.512	-1.08645	0.138365	4.07427e-16	3.0212e-14
LDHAL6A	18.4501	-0.361397	0.139362	0.00260043	0.0153762
TIAL1	22.2957	-0.110373	0.113184	0.268871	0.487739
KHDRBS1	23.827	0.280966	0.121933	0.00866893	0.0409425
STK19	22.3211	-0.133037	0.116035	0.190469	0.394904
ERGIC1	18.5184	0.192733	0.12915	0.0797045	0.219643
RNH1	20.2346	0.128198	0.120952	0.221731	0.433851
LPAR2	22.0613	-0.615962	0.14276	2.01457e-06	3.10825e-05
CSNK1A1	19.627	-0.0256874	0.120321	0.805701	0.903554
ITGA6	19.848	1.17937	0.229189	1.49743e-08	3.65162e-07
WNT9A	20.6384	-0.440728	0.14752	0.000546235	0.00419608
EXOC7	20.109	-0.281495	0.133748	0.0141123	0.0603054
HSPB7	11.0974	0.41153	0.181585	0.00465019	0.0247201
TP53BP2	22.8757	0.401605	0.138032	0.00083374	0.00600475
AMOTL1	19.169	-0.382739	0.137531	0.00140221	0.00916204
S100A4	13.7616	0.197711	0.171866	0.127362	0.303754
NRDC	19.9655	0.13895	0.126904	0.199337	0.406334
PACSIN3	15.9168	0.664882	0.156853	2.60917e-06	3.89339e-05
SETD5	25.2885	-0.259149	0.126133	0.01787	0.0729148
UNC13D	21.5167	0.187015	0.234868	0.169937	0.36643
MXRA8	26.0338	-1.37652	0.13822	2.43512e-24	5.7084e-22
MIDN	21.8773	0.0712594	0.12026	0.496071	0.701215
MYL12B	18.2926	0.122443	0.132632	0.274698	0.49314
SEPTIN8	22.5055	0.00326692	0.113278	0.974524	0.989088
GOLGA3	25.5639	-0.506867	0.138217	4.01894e-05	0.000441161
IK	19.4827	0.353842	0.13361	0.00234683	0.0140427
CCNL2	20.1524	-0.61152	0.138057	1.35978e-06	2.20078e-05
AKT1	21.6321	0.468435	0.135283	0.000103779	0.000994936
ZFP37	19.0091	-0.262976	0.139943	0.024998	0.094862
ANKRD11	21.2964	0.0284833	0.131069	0.797687	0.897753
STRBP	21.566	-0.24484	0.129837	0.0276271	0.10186
SLC3A2	21.9292	-0.0383394	0.118975	0.710726	0.85074
STAT3	20.2651	-0.00213622	0.125658	0.983557	0.992539
IGDCC4	21.8937	0.0227358	0.116514	0.823641	0.913113
EIF5	19.1224	0.355245	0.139828	0.0030299	0.0174195
ADGRL2	21.0803	0.122083	0.121034	0.242455	0.45895
IMPDH2	20.4573	0.328482	0.133632	0.00447509	0.0239473
FHOD3	22.3177	0.400816	0.139626	0.000910995	0.00646504
COX17	18.0395	0.180413	0.144566	0.126452	0.30208
APOBEC2	13.322	1.09602	0.167981	6.15285e-12	2.49792e-10
SCRN1	21.5644	0.0166714	0.125648	0.87665	0.943515
SDF4	22.2189	0.0101827	0.12757	0.924392	0.965028
PPIB	25.0293	-1.11032	0.151909	4.11339e-14	2.3537e-12
ZKSCAN5	20.1216	-0.0770391	0.134728	0.489373	0.696489
OGA	21.3124	-0.113633	0.122365	0.282249	0.501616
AP2B1	19.8763	-0.0240906	0.116109	0.812484	0.90738
CYGB	12.8089	0.725881	0.208302	4.10262e-05	0.000445647
MEX3A	24.3034	0.073492	0.117401	0.474591	0.685929
PRRG3	21.9505	-0.356689	0.137493	0.00268089	0.0157877
FOXO3	21.4002	0.141599	0.130708	0.196366	0.402422
PRKCSH	24.5698	-0.259391	0.13277	0.0226248	0.0876411
IREB2	20.7649	0.296813	0.133637	0.00946074	0.0435134
UBXN6	17.5827	0.300639	0.138569	0.0108732	0.0488052
POM121C	23.6996	-0.107605	0.115428	0.286077	0.506067
JAM3	23.0836	0.265263	0.126796	0.0154606	0.0647307
PDCD5	17.5595	0.106979	0.124956	0.318841	0.539698
PBXIP1	16.7718	0.247447	0.154647	0.0473755	0.150525
SEC24D	20.8686	0.00262831	0.124003	0.980752	0.991577
RAB21	17.9549	0.130441	0.134805	0.246867	0.464235
ANXA11	17.3567	-0.0308557	0.123028	0.770437	0.883225
HNRNPM	21.4417	0.222448	0.12722	0.0419367	0.138336
RTRAF	16.3833	0.637102	0.147957	2.18896e-06	3.34596e-05
SORBS2	18.1441	0.484386	0.15431	0.000308806	0.00255591
CKMT2	10.4522	0.550475	0.210055	0.00107539	0.0074286
SEC14L1	20.7797	0.2102	0.125971	0.0520671	0.161974
BCAR1	21.3687	0.0906057	0.118814	0.379854	0.599046
EXTL3	22.107	0.0898475	0.120027	0.387927	0.608668
MYO10	22.5895	0.568685	0.140482	6.57092e-06	8.85916e-05
C1QBP	18.3765	0.59134	0.143496	5.11846e-06	7.12564e-05
WNT10A	21.4014	-0.773014	0.149281	2.0878e-08	4.97443e-07
MBNL2	16.7341	0.0534547	0.13161	0.627252	0.797453
CYB5R3	14.9692	0.402004	0.185116	0.00631121	0.0317395
ZNF568	20.2903	0.137648	0.131037	0.212916	0.421596
CDKN1C	21.6299	0.188732	0.149438	0.119102	0.290441
TIMP3	17.7947	-0.108624	0.134752	0.333237	0.554276
SAE1	21.0734	0.213246	0.131169	0.0558971	0.171177
AHCY	18.8526	0.760826	0.140394	6.2618e-09	1.60227e-07
PPP6R1	19.4761	0.351869	0.153138	0.00600618	0.0303736
SQSTM1	16.2517	-0.103075	0.131455	0.352504	0.572947
CHMP3	20.2245	-0.00642836	0.122576	0.950884	0.979457
TNKS1BP1	22.0931	-0.326097	0.129257	0.00388562	0.0212947
ETFA	16.8102	0.332919	0.148619	0.00746838	0.0362097
ANK2	18.3975	0.267934	0.139625	0.0219394	0.0854412
RANBP2	23.134	-0.38667	0.138854	0.00132727	0.008713
PLPP7	18.8031	0.0490098	0.118376	0.634177	0.801705
LMCD1	16.5784	0.0290883	0.127025	0.787233	0.892517
GGTLC1	15.7481	-0.0348336	0.134861	0.753408	0.873904
CTDNEP1	17.9603	0.297156	0.139562	0.0120998	0.0531618
MDH2	15.5264	0.552166	0.156271	5.79975e-05	0.00059698
RHEB	17.9884	0.124139	0.137669	0.275169	0.493289
REEP5	17.2681	0.655478	0.148134	1.07947e-06	1.80333e-05
ZMIZ1	22.9094	-0.483472	0.140776	0.000107491	0.00102646
LMAN1	21.5001	-0.34309	0.134771	0.00327826	0.018525
TMEM250	21.5721	-0.336764	0.147771	0.00650902	0.0324647
PHLDA3	15.4379	0.491917	0.178762	0.000858367	0.00616378
AKAP6	16.8871	0.32748	0.152467	0.00928149	0.0428789
CTNND1	21.4039	0.0873991	0.119626	0.398722	0.618506
NOTCH2	27.7713	-0.984942	0.144036	5.98234e-13	2.71711e-11
SDHC	16.3211	0.152828	0.138828	0.186198	0.38927
SKIL	25.1475	-0.506465	0.133543	2.58246e-05	0.000298358
PCGF3	21.8583	-0.0479856	0.118287	0.640187	0.80599
TMBIM6	22.0846	-0.314611	0.132197	0.00591977	0.0300202
STMN3	19.2255	-0.225896	0.14063	0.0525957	0.163234
NACC1	20.843	0.0414983	0.121214	0.692737	0.837763
CPLX2	18.8934	-0.178204	0.137302	0.120476	0.292606
PNRC1	18.4113	-0.031297	0.120181	0.763602	0.879552
CARM1	17.0957	0.0974627	0.126136	0.365324	0.585792
PRDM5	20.4183	-0.607977	0.141128	2.19166e-06	3.34596e-05
ARF4	19.5271	0.0539147	0.120691	0.607132	0.784779
C6orf62	20.1926	0.131837	0.120963	0.208056	0.416628
SLC25A6	21.3944	0.0400541	0.125483	0.71013	0.850259
MAVS	21.2602	-0.0141533	0.114905	0.887808	0.948663
CAV1	13.5774	0.272016	0.1737	0.0424244	0.139438
SERPINB6	19.9227	0.546921	0.142769	1.89657e-05	0.000225941
AGPAT1	18.1998	0.170367	0.125036	0.113368	0.281464
RAB5B	19.7633	-0.00523457	0.116949	0.95898	0.982782
ATF7IP	21.0128	-0.113685	0.119945	0.273323	0.49198
MIDEAS	23.2963	-0.205923	0.129804	0.0620434	0.184329
TXNIP	17.4693	-0.1553	0.134848	0.167254	0.363467
UQCRQ	16.7096	0.452788	0.14826	0.000447344	0.00351674
TAGLN	22.9131	-0.846894	0.147871	1.10856e-09	3.20952e-08
RAB12	17.2778	0.394798	0.14016	0.00116275	0.00785286
PCBP4	20.4161	0.574918	0.133697	2.47131e-06	3.71054e-05
CYC1	14.4275	0.399103	0.163055	0.00309665	0.0177192
TMED9	20.2274	-0.0795748	0.134337	0.476983	0.686063
PADI2	13.765	0.0367225	0.145562	0.751015	0.87276
PLEKHD1	19.2247	-0.0804811	0.138692	0.476281	0.686063
PSMB3	15.9042	0.511284	0.16589	0.000332811	0.00272052
TUBB	21.0553	-0.072816	0.132705	0.513065	0.717312
PPP2R1A	18.2936	0.360288	0.139945	0.00274483	0.016125
TNFRSF10C	20.5101	-0.627625	0.142259	1.24754e-06	2.0511e-05
MAP3K7CL	19.6339	0.511692	0.187497	0.000905765	0.00644051
ZNF428	19.3227	0.390839	0.146193	0.00187364	0.0115977
ATN1	23.0297	-0.607511	0.158374	1.64044e-05	0.000199683
MRLN	17.4986	0.56386	0.169437	0.000123272	0.00115441
ZNF362	21.3418	-0.385846	0.159844	0.00388985	0.0212968
MED19	20.3358	-0.424851	0.136754	0.000421615	0.00335216
UQCRB	13.8397	0.741288	0.174045	2.28563e-06	3.46757e-05
RBMXL1	22.2853	-0.405241	0.14361	0.00112442	0.00766523
FILIP1	19.7179	0.259097	0.138043	0.0263387	0.0983572
PSMA1	17.5734	0.0711606	0.127564	0.51352	0.717521
MARS1	20.0395	-0.055239	0.127232	0.608102	0.785075
WIPI1	16.6384	0.263967	0.145969	0.0293056	0.106628
STT3A	20.3861	-0.109043	0.118062	0.288075	0.508934
H1-7	20.3047	-0.266564	0.137524	0.0217662	0.0849491
SMARCA4	22.8498	0.0343125	0.112502	0.730237	0.862853
POTEG	20.2425	-0.866999	0.156975	3.22783e-09	8.75248e-08
OS9	19.9281	-0.0618335	0.11934	0.550585	0.74582
EMILIN1	24.8905	-0.851914	0.142448	2.00901e-10	6.697e-09
ANK1	12.973	0.316889	0.163143	0.0158856	0.066155
SDC3	24.0155	-0.600854	0.131992	7.70188e-07	1.33261e-05
ATP5PO	14.3882	0.545594	0.176127	0.000280088	0.00235851
MCU	18.6501	0.303372	0.145652	0.0126144	0.0548617
SH3PXD2A	21.9866	-0.627991	0.132768	2.9182e-07	5.47973e-06
TBC1D1	19.7661	0.499826	0.146388	0.000114003	0.00108295
SET	20.0396	0.278043	0.143758	0.0210353	0.0826735
UBE2E3	19.8182	0.409688	0.143588	0.0010285	0.00715107
RABL6	19.8471	0.247984	0.129283	0.0252836	0.0955964
GNPTAB	20.4168	0.028597	0.118424	0.782058	0.889656
SELENOF	18.3912	0.207782	0.136528	0.0696832	0.200808
DCK	18.4287	0.196528	0.132626	0.0791247	0.218631
PLAT	21.634	-0.239282	0.142788	0.0444891	0.144267
CLASP1	20.1743	0.413853	0.144138	0.000870604	0.00623933
MKNK2	16.6288	0.338301	0.157974	0.00872147	0.0409425
NET1	25.5897	-0.738009	0.144024	3.29736e-08	7.55897e-07
RAB39A	20.8182	-0.495521	0.134366	4.04322e-05	0.000441836
CREB3L2	21.6087	-0.118323	0.120738	0.257606	0.47622
RPL11	18.6239	0.24599	0.145855	0.0413653	0.136824
MYOD1	22.3072	0.475603	0.142197	0.000148127	0.00135255
AGAP1	19.1601	-0.0662983	0.121152	0.525945	0.727039
EIF2S3	21.1762	0.16971	0.125061	0.114412	0.283282
THY1	22.2753	-0.48758	0.174917	0.000916425	0.00647827
SLF2	21.3374	-0.17978	0.122246	0.0889511	0.238581
NDUFV3	15.5975	0.0850308	0.12801	0.433753	0.651525
RAP1B	18.8475	-0.182357	0.137376	0.110739	0.277531
JUND	18.6196	-0.0778524	0.136331	0.493784	0.699752
PKDCC	24.819	-0.558643	0.135169	5.86344e-06	8.03948e-05
TMEM119	26.2534	-0.469124	0.178377	0.00130882	0.00862301
RSF1	19.2708	-0.0197083	0.116668	0.846311	0.925925
XBP1	18.2251	-0.150954	0.152858	0.210544	0.419185
MDK	21.876	-0.201748	0.138282	0.0812616	0.223009
NDRG2	10.561	-0.0297517	0.14645	0.796693	0.897146
TM9SF2	18.2873	-0.00278133	0.117328	0.977921	0.990662
DELE1	21.5757	-0.281266	0.13606	0.0148205	0.0626895
MTURN	18.4155	0.229546	0.141913	0.0524435	0.162866
ACVR1	18.9799	-0.133441	0.125106	0.212467	0.420953
BANK1	19.378	-0.108071	0.120661	0.299276	0.520424
LASP1	20.8158	-0.422156	0.149627	0.00109157	0.00751175
NDST1	21.2542	-0.31886	0.132107	0.00532985	0.0275951
PIGT	17.4587	0.457784	0.155515	0.000564841	0.00432985
SNHG32	19.5113	-0.0979509	0.126917	0.366717	0.58699
PSMC5	18.3251	0.337166	0.14681	0.00642619	0.0321619
SEC61G	19.7202	0.246385	0.132007	0.0290094	0.105776
COPS6	16.6086	0.102689	0.137354	0.366539	0.586963
TCEA3	16.2785	0.64686	0.156411	3.96784e-06	5.66489e-05
CDK11A	20.598	0.200851	0.131211	0.0701941	0.2017
SLC35E2A	21.5295	-0.246894	0.133131	0.0297037	0.107338
TEX13B	20.2064	-0.510323	0.140337	4.56906e-05	0.000486852
CDC42BPB	19.7587	-0.134062	0.129517	0.223728	0.436422
CTSB	17.743	-0.138937	0.134479	0.21743	0.427738
GJD4	20.9504	0.336142	0.145677	0.00644203	0.0321969
PEAK1	19.0747	-0.00595338	0.119176	0.953797	0.980545
EIF3D	17.4092	0.267372	0.145561	0.0266417	0.09898
DHRS1	19.4873	-0.265866	0.136793	0.0216737	0.0847245
TOB1	15.2303	0.18215	0.140139	0.115047	0.283984
CBX6	21.7405	-0.63364	0.144628	1.57504e-06	2.51403e-05
SUB1	18.1407	0.157695	0.134404	0.163316	0.358338
TIMM23B	20.6858	0.206049	0.125941	0.057074	0.174048
EFEMP2	21.6679	-0.466353	0.139722	0.000152151	0.00138508
TRIM8	19.1094	0.471454	0.144192	0.000193886	0.00170578
DCAF6	16.6988	0.116775	0.130854	0.288713	0.509365
SMARCC1	22.1078	0.122008	0.117755	0.233822	0.448713
IPO7	19.1701	0.215274	0.134003	0.0564766	0.172516
PSMD4	15.9222	0.115438	0.141204	0.320447	0.541681
EEF1A2	13.8723	0.645665	0.169737	1.52114e-05	0.000186096
KLF5	18.241	0.68482	0.144984	2.58373e-07	4.88957e-06
IST1	18.4718	0.120969	0.126603	0.262931	0.481482
CCDC86	20.6605	-0.632132	0.147758	2.40764e-06	3.63749e-05
OTUD4	20.3329	0.452677	0.145024	0.000346659	0.00282102
MXRA7	17.8167	0.167848	0.137895	0.144113	0.330368
PJA2	21.025	-0.0174903	0.117033	0.863882	0.935214
ALG2	27.4609	-1.8582	0.14901	2.25413e-36	2.34011e-33
NR2F2	20.5203	0.268686	0.166514	0.0417601	0.138004
GATA2	19.9824	-0.315365	0.143866	0.00902236	0.0420292
CHCHD10	11.938	0.630796	0.178748	4.77363e-05	0.000503364
PAFAH1B1	18.9972	-0.184959	0.126974	0.0892715	0.239209
SEPTIN4	18.0965	0.570351	0.174967	0.000149065	0.00135917
SRSF6	20.0317	-0.281676	0.135791	0.0154094	0.0646335
TXLNB	17.0826	0.329493	0.141607	0.00624168	0.0314116
KIAA0100	19.5641	0.0193531	0.123409	0.85561	0.930379
RBM5	20.7511	-0.55529	0.141207	1.25262e-05	0.000157216
LSM4	16.722	0.0850912	0.124456	0.425227	0.643495
ADAM9	17.4416	0.236737	0.161102	0.0619387	0.184244
ITGB1BP2	16.625	0.770866	0.161026	1.55558e-07	3.13141e-06
ZCCHC24	21.1657	0.0656131	0.115834	0.519405	0.721705
TEAD1	16.7092	0.358431	0.142201	0.00320621	0.0181775
PLEKHO1	17.7056	0.176363	0.12976	0.110421	0.277081
TOX4	18.4171	0.0525317	0.120539	0.614066	0.789718
MACO1	18.5052	-0.0474128	0.12004	0.647247	0.809656
EPN2	21.0092	-0.155955	0.132701	0.160967	0.355128
CTSZ	18.8813	0.318801	0.153535	0.0117671	0.0519425
PRPF4B	19.0909	-0.0110623	0.115809	0.912841	0.960544
REEP1	18.2077	0.215572	0.143523	0.0672649	0.195917
UBAP2L	19.7996	0.0900487	0.122457	0.393484	0.613616
LUC7L3	20.9194	-0.319466	0.136601	0.00656217	0.0326402
CCNY	19.794	-0.0402866	0.117124	0.693986	0.838855
SLC25A11	15.9884	0.635951	0.161461	9.27556e-06	0.000121015
FST	21.1648	0.0220484	0.123182	0.835924	0.920822
VSIG10	20.4036	-0.275299	0.133222	0.0158521	0.0660535
PET117	18.7331	-0.288999	0.138902	0.0141158	0.0603054
S100A10	14.7295	-0.0305703	0.138184	0.788373	0.892824
SLC12A4	19.7859	-0.440851	0.140871	0.000353783	0.00286615
RCN2	20.7117	-0.120831	0.126025	0.25947	0.478448
ADGRL1	22.4981	-0.421845	0.139771	0.000533303	0.00410541
ATP6V0E1	13.2742	0.554205	0.168724	0.000145024	0.00132899
MAPRE3	15.8341	0.685043	0.155139	1.09275e-06	1.82134e-05
SNRPD3	17.6266	0.428905	0.144009	0.000595179	0.00451479
SCAMP2	19.0448	0.220281	0.137612	0.0559325	0.171214
PRPF8	19.6845	-0.0175185	0.117635	0.864124	0.935298
STX5	19.9979	0.023115	0.118251	0.823233	0.91307
SPANXA1	18.8117	-0.207657	0.130537	0.0610993	0.182163
LRP5	21.3022	0.105699	0.118574	0.304503	0.52586
KDM5C	19.175	-0.0880809	0.124049	0.407861	0.626756
MRPL20	17.2008	0.00145774	0.120855	0.989162	0.995049
ORMDL3	17.5653	-0.213563	0.134693	0.060345	0.180762
BNIP3L	18.9312	-0.274531	0.133526	0.0165077	0.0682765
HECTD4	20.7695	0.106984	0.123656	0.31118	0.533172
SIRT6	21.1434	0.703643	0.330052	0.00231528	0.0139396
FBXO10	19.6046	0.024535	0.127543	0.820533	0.911944
ZNF267	19.7503	-0.520008	0.144223	5.23916e-05	0.000542131
CUL3	17.6867	0.328698	0.165871	0.0131767	0.05692
MRPL55	18.997	0.0508373	0.121142	0.628202	0.797986
RGS7BP	17.1827	-0.337828	0.155801	0.00871765	0.0409425
COX7B	13.0555	0.796181	0.176672	6.06811e-07	1.06514e-05
FBN2	32.9013	-2.50053	0.197908	8.08219e-37	9.78888e-34
THBS1	23.7924	-0.187492	0.217062	0.166579	0.362433
TRIM66	20.0462	-0.46528	0.139754	0.000162118	0.00146349
ABITRAM	20.0622	-0.28991	0.133162	0.0112811	0.0502636
DNAJB6	17.9709	0.0901774	0.132364	0.413506	0.631292
KIAA0754	19.6185	0.00251725	0.121951	0.981252	0.991601
NSD2	20.3625	-0.405319	0.13674	0.000757651	0.00554466
COX8A	12.9961	0.146448	0.154548	0.231239	0.445734
PPME1	16.3641	0.577007	0.164035	5.84889e-05	0.000600337
ADAMTS2	16.6783	0.169035	0.163642	0.17492	0.373588
DMWD	20.3089	-0.47933	0.154548	0.000340924	0.00278058
PTCD3	18.5099	0.0122807	0.124914	0.90861	0.959351
FLYWCH2	17.8226	-0.43861	0.149358	0.000700139	0.00518117
SNU13	16.6368	0.337882	0.15703	0.00922923	0.042719
FAM114A1	19.8563	-0.134815	0.12422	0.205428	0.413875
IRF2BP2	20.2627	-0.0741202	0.118381	0.47183	0.68405
DGCR2	20.6942	0.0503643	0.116283	0.622591	0.794445
DNAJB11	17.252	0.152867	0.13211	0.168048	0.364104
USF2	17.1087	0.0696171	0.124526	0.51456	0.718269
HSPE1	16.2511	0.126469	0.139509	0.272727	0.491422
LDHC	15.6554	0.270683	0.151809	0.0288974	0.105473
AKIRIN2	16.8026	0.20922	0.140054	0.0716858	0.205095
MAPK8IP3	19.8043	0.0586944	0.117697	0.567818	0.758517
PKIA	14.3336	0.73564	0.160665	5.25804e-07	9.41137e-06
CLPTM1L	17.9658	0.288112	0.143057	0.0166248	0.0686823
HIF1A	18.9881	0.0719272	0.123252	0.496818	0.701466
PREPL	15.6437	0.0618117	0.13572	0.579599	0.765948
SNTB1	20.0096	0.0974814	0.128484	0.370054	0.589474
UBE2V1	19.0496	0.37961	0.140859	0.00182875	0.0113489
HM13	18.2823	-0.127078	0.13107	0.248664	0.466093
ARHGAP26	19.8476	-0.471638	0.149231	0.000282203	0.00237083
COPB1	18.9222	-0.322679	0.138661	0.00640518	0.0321006
GRIN2A	16.6962	-0.119489	0.13345	0.285089	0.504933
ZC3H13	22.3589	0.116913	0.122303	0.264822	0.483169
UBE2D3	15.2797	0.11511	0.147006	0.331738	0.552643
MAP2K3	14.375	0.251931	0.151188	0.0405259	0.134722
B4GALT1	15.5881	0.0596005	0.135621	0.596098	0.777569
HNRNPA0	21.5667	0.182874	0.127488	0.0941	0.248122
GGNBP2	17.8817	0.0244713	0.120485	0.814439	0.908526
CACNG1	15.7193	0.552843	0.161206	8.31182e-05	0.000819566
SHC1	18.187	-0.233904	0.138695	0.0445413	0.144372
FABP3	11.7204	0.558795	0.175626	0.000197382	0.00173443
AARS1	20.5658	-0.0122793	0.117717	0.904389	0.958325
GTF3C6	15.8745	0.23727	0.152531	0.055185	0.169211
ZNF638	18.5533	-0.237457	0.130662	0.0334269	0.117429
SREBF2	19.7829	-0.0851284	0.124734	0.423133	0.64114
FADS1	18.3695	-0.721983	0.156289	4.11973e-07	7.57926e-06
S100A11	16.2528	0.148959	0.147149	0.212207	0.420953
ZFAND5	16.676	0.103267	0.128699	0.344428	0.565768
CMYA5	13.2816	0.224356	0.173536	0.0856549	0.231853
ACLY	18.7658	-0.199606	0.12888	0.0696902	0.200808
SRCAP	19.0504	-0.00807333	0.12205	0.938345	0.97233
C1orf105	14.8378	0.912002	0.171974	9.81282e-09	2.45896e-07
PDLIM1	13.8112	0.49325	0.164817	0.000465354	0.00363236
SH3D21	18.6977	-0.439232	0.149422	0.00066141	0.00495002
GOT1	13.8216	0.384018	0.158594	0.00367024	0.0203911
PLG	18.6519	-0.190243	0.132678	0.0887258	0.238098
PMP22	14.2073	0.124823	0.143715	0.282625	0.501852
SNRPD2	16.4119	0.195603	0.144568	0.0975972	0.255214
PEA15	15.6699	0.0885431	0.13305	0.42816	0.646141
JOSD2	19.0949	-0.195006	0.130655	0.0793654	0.219129
INTS6	18.2066	-0.0586651	0.1265	0.583623	0.768749
NDUFB8	14.9282	0.343178	0.152789	0.00727461	0.0354558
HNRNPAB	18.9795	0.333053	0.14062	0.00570019	0.0291518
STRAP	17.5383	0.351384	0.147244	0.00483222	0.0254462
TAOK1	18.6334	-0.0331125	0.122145	0.752579	0.87366
CSNK1D	19.0907	0.0071118	0.118612	0.94556	0.976326
SOX9	17.8695	0.187063	0.131981	0.0949636	0.249675
ELOB	13.7438	0.270584	0.172647	0.0449228	0.145349
PAFAH1B2	17.0554	0.0840664	0.126011	0.434851	0.652101
WSB1	22.5972	-0.612964	0.144917	3.03993e-06	4.4719e-05
CDK4	16.8604	0.0921027	0.127879	0.396425	0.616609
EIF1AX	17.0445	0.360309	0.145256	0.00359748	0.020079
BRK1	17.0836	0.0111151	0.1212	0.915929	0.96139
NDUFB6	16.7441	0.408744	0.142885	0.000952612	0.00668853
HUWE1	19.0846	0.177582	0.129023	0.104558	0.267638
OLA1	17.0207	0.386929	0.156562	0.00319325	0.0181292
DUSP1	16.2871	0.278995	0.148981	0.0237953	0.0912509
CDC42EP1	18.4505	0.237385	0.147361	0.0496278	0.155739
PAPOLA	16.6929	-0.0907497	0.124553	0.394217	0.614364
MLIP	17.785	-0.196008	0.130167	0.0765523	0.213635
ANXA1	16.6721	-0.223469	0.144854	0.061979	0.184247
SLIT3	16.2945	0.1225	0.150965	0.301449	0.522839
SF3B3	18.1498	-0.236692	0.132486	0.036336	0.124848
SMARCAD1	18.6561	-0.0568863	0.125731	0.594185	0.775911
EZR	13.777	0.0579471	0.144194	0.616029	0.791213
IRGQ	20.0995	0.16391	0.125527	0.12709	0.303205
LRRFIP2	16.749	-0.105202	0.126915	0.330567	0.55206
TSNAX	19.2075	-0.0677107	0.120723	0.515223	0.718583
ALKBH5	15.591	0.16024	0.130987	0.149078	0.338596
TARDBP	19.5617	0.186632	0.127022	0.0869189	0.234462
PIGS	18.0888	0.384004	0.141604	0.00161279	0.0103416
NDUFB9	14.6823	0.745929	0.158427	2.49727e-07	4.74752e-06
GSPT1	17.6672	0.207143	0.13435	0.066944	0.195177
PDGFRA	24.0219	-0.522607	0.163399	0.000201624	0.0017653
PRPF38B	20.0191	-0.0591152	0.119752	0.568073	0.758718
PSMD8	16.4865	0.454375	0.155976	0.000682346	0.00507534
SNRPN	17.6307	0.0810544	0.123118	0.44341	0.658276
ECM2	16.5271	0.134752	0.145856	0.251814	0.469695
PTGES3	16.3563	0.184147	0.141297	0.115595	0.284658
FZD4	16.2013	-0.176364	0.135866	0.120513	0.292606
SULT1A4	19.6374	-0.738078	0.143579	2.83343e-08	6.59953e-07
WDR6	19.8123	-0.0348322	0.118702	0.735765	0.865599
CD59	16.9853	0.049025	0.127874	0.651024	0.812188
RGMA	18.4342	0.322655	0.139774	0.00679008	0.0335042
SRP9	17.402	0.0995536	0.128087	0.361012	0.582218
SH3YL1	19.5431	-0.136754	0.131592	0.218321	0.428976
YAP1	20.6305	-0.0420424	0.114657	0.676593	0.825659
PAIP2	15.8239	0.336248	0.147863	0.00679138	0.0335042
COBL	19.7779	0.992087	0.153129	6.48839e-12	2.60503e-10
PPM1G	19.1975	0.0666483	0.120074	0.522945	0.724408
LTBP1	21.2096	-0.42915	0.148186	0.000827736	0.00598523
KCNMB4	17.8219	-0.156727	0.137209	0.167806	0.363942
PCDH11X	18.498	0.0853679	0.134462	0.442506	0.657868
PTK2	19.3228	0.0551812	0.120896	0.59895	0.778559
EOMES	19.679	-0.645774	0.151527	2.45078e-06	3.68734e-05
PFKL	17.513	0.00138654	0.123494	0.989964	0.995581
UTP11	15.9633	-0.0361258	0.133068	0.745348	0.870112
GABARAPL1	16.8498	-0.00654169	0.124874	0.950702	0.979425
KHSRP	21.8426	0.0110063	0.125896	0.91922	0.962949
MCRIP1	17.7832	0.00521314	0.132478	0.961868	0.984342
SYTL5	19.1367	-0.278767	0.14314	0.0192956	0.0774613
SMDT1	14.1425	0.286452	0.159784	0.0264022	0.0984966
SPAG9	20.1087	-0.107807	0.127824	0.317341	0.538749
BCL9L	18.2684	-0.19253	0.130327	0.0820729	0.224398
COX7A2	17.0901	0.117537	0.136471	0.29852	0.520102
ZRANB2	18.5504	-0.48962	0.145202	0.000130909	0.00121651
COL13A1	20.1622	-0.804716	0.141498	1.32337e-09	3.7862e-08
PGAM2	10.9217	0.274188	0.170843	0.0387928	0.13142
PPDPF	15.9541	0.0473961	0.134269	0.671562	0.822282
FGFR1	21.2145	-0.546657	0.141157	1.69086e-05	0.000205419
ADRM1	15.8307	0.437553	0.157693	0.00111351	0.00761948
EHD1	18.9035	0.246569	0.132344	0.0284357	0.104418
PTPN21	20.8296	0.320977	0.131695	0.00482486	0.0254258
RDX	15.4419	-0.0582506	0.128112	0.590718	0.773887
IGFBP2	19.8319	-0.527778	0.146542	4.81088e-05	0.000505943
DCAF1	16.9197	-0.0848334	0.127352	0.431856	0.649789
NFYC	17.5579	0.0606611	0.124524	0.569371	0.759701
UBE2G1	13.432	0.109091	0.142026	0.346693	0.567807
SS18	18.8987	-0.157276	0.131863	0.157123	0.350357
MARK4	18.8955	0.0671967	0.124091	0.526892	0.727716
TRA2A	19.4453	-0.312947	0.139837	0.00836952	0.0398828
SDK2	19.6204	-0.357697	0.144493	0.00362577	0.0201904
PALMD	13.7299	0.591638	0.161553	3.16225e-05	0.000354631
RUNX1	18.4101	-0.721819	0.169334	2.439e-06	3.67722e-05
CNOT11	17.6149	0.0676744	0.121775	0.519667	0.721792
MRPL33	16.8271	-0.0151765	0.123939	0.886187	0.947941
ZBTB18	18.1789	0.475198	0.149538	0.000251174	0.00213483
RERE	17.6733	-0.0103711	0.134713	0.925588	0.965505
TMEM38A	12.3107	0.158983	0.153061	0.188727	0.393066
PPP1CC	18.8491	0.0153677	0.119767	0.883272	0.946996
SLC36A1	19.5156	-0.178307	0.130315	0.106499	0.270509
FUBP3	18.3205	-0.165009	0.126263	0.126969	0.303015
AGAP3	17.1538	0.0569814	0.123857	0.593323	0.775309
GPKOW	18.0883	0.22202	0.129688	0.04532	0.146049
PLPP4	18.0287	-0.754052	0.150125	5.58533e-08	1.24124e-06
EFR3B	18.8639	-0.353734	0.141061	0.00339463	0.0191083
MAGEA8	19.1636	-0.404006	0.136682	0.000744133	0.00546224
ELL	17.4318	0.210614	0.14343	0.0759842	0.212642
AXL	18.073	0.0760179	0.134542	0.495492	0.700669
TMEM9	19.3161	-0.363237	0.135355	0.00202756	0.0124026
EIF2S2	15.7514	0.249093	0.147595	0.0398117	0.13357
ARFGAP1	20.9746	-0.403287	0.143069	0.00116049	0.0078449
NRK	18.3758	0.368549	0.14033	0.00224384	0.013577
YTHDC1	19.182	0.0589274	0.124459	0.580217	0.766455
SMARCA5	18.8139	0.135483	0.136381	0.233252	0.448713
PRDX5	17.4537	0.40725	0.143569	0.00104926	0.00726881
AKR1E2	19.6108	-0.440889	0.13821	0.000293812	0.00244854
ACSL4	18.2714	-0.107864	0.132874	0.330319	0.552056
DDX4	18.0374	-0.202227	0.159028	0.104005	0.267069
GOLPH3	18.1693	0.069884	0.125783	0.513807	0.717521
RANBP1	17.2412	-0.0208109	0.146808	0.85794	0.93132
CD164	16.4379	-0.126868	0.138702	0.267066	0.485677
PGD	18.3732	0.196532	0.137259	0.0875608	0.235494
NARS1	15.3344	0.216021	0.149708	0.0758711	0.212632
LTBP3	24.0053	-1.11095	0.133327	6.59332e-18	6.47482e-16
NAP1L4	17.1208	-0.0177056	0.127408	0.869626	0.939118
TMEM263	19.5431	0.0630756	0.128553	0.562043	0.753897
LIMA1	20.2939	-0.241711	0.133229	0.0333393	0.117212
HOMER2	15.8972	-0.0944346	0.129746	0.38885	0.609506
UBE2I	19.0933	0.270726	0.134124	0.0179768	0.0732684
SERPINE1	16.4068	-0.0217577	0.121805	0.835804	0.920822
EFTUD2	17.3158	0.1541	0.13113	0.16251	0.35711
RAP2B	17.1485	0.0447833	0.129149	0.681117	0.828259
CPTP	17.4498	-0.553445	0.146608	2.45505e-05	0.000285454
LDB1	19.9041	-0.00224054	0.120686	0.982456	0.992287
ENDOD1	18.2665	0.684546	0.154585	9.74781e-07	1.63975e-05
FAM90A1	17.1773	0.129852	0.130784	0.237723	0.454017
FEM1A	14.1068	0.761455	0.161403	2.29072e-07	4.41556e-06
GOLGA4	18.551	-0.0146162	0.116974	0.885894	0.947941
SCARB2	17.8282	0.0278286	0.128609	0.798259	0.898257
PSMD14	15.7717	0.249492	0.14451	0.0379019	0.129008
WNT10B	17.8415	-0.101706	0.130219	0.352398	0.572903
APMAP	19.5712	-0.243462	0.131607	0.0300133	0.108084
AK2	18.0061	0.166925	0.134828	0.140617	0.324302
SPIN2B	19.8983	-0.305586	0.144568	0.0117557	0.0519324
RASA3	18.4006	-0.129066	0.130062	0.239091	0.455508
SNRPB2	18.2032	0.592852	0.146282	6.70614e-06	9.00804e-05
SEM1	15.4479	0.269533	0.147329	0.0271339	0.100398
PDCD6	18.3901	-0.436715	0.148552	0.0007356	0.00541053
IQSEC1	19.2127	-0.0937397	0.12124	0.371433	0.590376
FAM118A	18.0799	-0.100558	0.122419	0.340403	0.561333
ZC3H4	18.7028	-0.141629	0.129038	0.196028	0.402021
PAMR1	17.6592	0.3179	0.139552	0.00738481	0.0358726
PEBP1	17.4564	0.42477	0.154253	0.00130363	0.00859664
SMAD1	17.0704	0.17376	0.129801	0.115026	0.283984
MICOS10	15.5619	0.31943	0.15422	0.01201	0.0528628
ZNF333	18.6079	0.0409207	0.173121	0.734422	0.864999
FAM120A	16.4241	-0.111344	0.133108	0.317375	0.538749
CTBP1	18.5938	0.0720572	0.122001	0.495121	0.700418
SEL1L	16.827	-0.0189145	0.126073	0.859184	0.931531
DCAF8	18.3963	-0.107218	0.124586	0.316254	0.538023
RHBDF1	17.1812	-0.0849954	0.128924	0.436378	0.653443
RAB35	17.647	-0.0386997	0.121925	0.713342	0.852749
SSB	15.9431	0.725654	0.176291	4.39373e-06	6.19985e-05
KIAA2013	17.9063	-0.068096	0.126586	0.527549	0.727786
VDAC3	16.2331	0.461868	0.154136	0.00049075	0.00381012
FIBIN	27.364	-1.28849	0.185704	5.10518e-13	2.36301e-11
BCAP31	16.1126	0.307255	0.144332	0.0113718	0.0506364
BTG1	17.4433	0.0453661	0.124616	0.671358	0.822259
WSB2	17.929	0.400835	0.137123	0.000824832	0.00597612
GABARAPL2	16.2802	0.11935	0.129324	0.275671	0.493545
ATG9A	16.6156	0.0548085	0.126594	0.610873	0.787235
NHSL1	17.6471	0.667739	0.145097	4.78248e-07	8.6679e-06
NR1H2	18.0353	-0.254404	0.143487	0.0326409	0.115258
CKAP4	23.6775	-1.2029	0.134417	4.15352e-20	5.20407e-18
ATP2C1	17.3374	0.0593474	0.125921	0.581169	0.766835
PFN2	19.0122	-0.311372	0.146077	0.0114265	0.050849
GGA3	18.0547	0.0849034	0.124641	0.426329	0.644481
PSMD13	15.9827	0.280453	0.153694	0.0257226	0.0968028
FAM171A1	19.5935	-0.105058	0.119302	0.310611	0.532612
TMCO1	16.0944	0.182734	0.138655	0.112934	0.280866
RGS3	18.6909	-0.534945	0.156074	9.62305e-05	0.000933654
FXYD6	15.1389	-0.137025	0.140242	0.234584	0.449795
HSPB6	9.73026	-0.0997547	0.157299	0.408028	0.62688
ADGRA3	21.1742	-0.484517	0.132899	4.90619e-05	0.00051226
FHIP1B	17.7042	-0.122409	0.128531	0.259763	0.478523
LZTS2	19.1089	-0.249778	0.136801	0.0310088	0.111006
FBN1	18.3278	-0.676715	0.163196	3.68022e-06	5.27498e-05
FOSL2	15.3908	-0.138489	0.150108	0.248322	0.466021
B4GALT5	17.0649	0.117534	0.128697	0.280285	0.499101
CDK3	17.3879	-0.401366	0.145071	0.00129263	0.00853962
SSR1	19.5725	-0.287163	0.131517	0.0114709	0.0510153
SRP14	17.3137	0.587556	0.155562	2.22125e-05	0.000260773
REX1BD	16.9424	0.0925671	0.127068	0.391755	0.611707
RBM3	19.4598	0.20989	0.13167	0.0607952	0.18181
THRA	14.9965	0.234451	0.165875	0.0686271	0.19877
ZNF703	17.5594	-0.349856	0.160492	0.00850985	0.0404454
VAPA	15.0969	0.334379	0.154607	0.00886637	0.041462
SPPL3	17.4162	-0.0886459	0.125305	0.407461	0.626539
GLUL	12.8343	0.185453	0.144751	0.116848	0.28658
ZFAND6	16.1808	0.0485131	0.131539	0.659116	0.816198
LRIG1	19.2698	0.445529	0.140496	0.00029968	0.00248604
FXR2	17.0706	0.336448	0.146692	0.00635153	0.0318981
SEC11A	16.7139	0.216745	0.156274	0.0830753	0.226468
STT3B	16.4599	0.401977	0.153345	0.00194912	0.0119687
TNIK	18.4697	-0.0268169	0.120042	0.796137	0.896844
POMP	14.9665	0.256186	0.143727	0.0322289	0.114359
AHSA1	15.9053	0.477909	0.150265	0.000265105	0.00224536
ALG12	18.069	0.0298267	0.124601	0.779671	0.888701
ADSL	16.4246	0.419129	0.145038	0.000813954	0.005915
LRRC17	22.7402	-1.22715	0.169406	2.83065e-14	1.6589e-12
CD27	18.3863	-0.31053	0.139392	0.00884336	0.0414077
RPL7L1	18.642	0.194387	0.126025	0.0724469	0.206136
AGAP9	19.6585	-0.608784	0.142013	2.58014e-06	3.858e-05
SIRT2	17.77	-0.194928	0.132433	0.081885	0.224296
MTMR10	17.3209	0.119155	0.129217	0.274614	0.49314
CAMK2D	15.5144	0.310695	0.147974	0.0116932	0.051782
NDUFB7	14.476	-0.144112	0.148037	0.229357	0.4434
PRXL2A	16.3242	0.19254	0.138344	0.0943002	0.24838
TERF2IP	19.8857	0.127813	0.127049	0.235528	0.451177
TRIM61	17.6352	0.00100506	0.135232	0.993386	0.99681
RANBP9	16.7622	0.162031	0.135121	0.151492	0.342327
MCM5	18.2684	-0.343448	0.145459	0.00533143	0.0275951
KIAA1143	16.7126	0.654105	0.157301	3.53811e-06	5.10147e-05
SSR3	17.4468	0.0269897	0.126515	0.802885	0.902045
WBP4	16.7145	-0.014899	0.124363	0.888218	0.948799
SUGP2	19.0201	-0.301543	0.138975	0.0106138	0.047818
NDUFS6	14.7382	0.511953	0.170636	0.000425776	0.00337049
RBM42	16.674	0.378477	0.153413	0.0034441	0.0193418
EBNA1BP2	16.1063	0.597726	0.154462	1.31157e-05	0.000163766
ERH	15.5175	0.439798	0.158276	0.00113965	0.00773281
NDUFB2	14.7304	0.159466	0.139866	0.167517	0.36393
VAPB	15.1662	0.149857	0.142451	0.196981	0.403115
AKR1A1	16.9727	-0.154185	0.129902	0.162188	0.356686
UBL3	17.1988	-0.559106	0.155817	4.84155e-05	0.0005077
AP2A2	17.183	-0.198174	0.134747	0.0804522	0.221129
MYH7B	13.2383	0.702486	0.202649	4.66052e-05	0.000494423
RBM38	17.4409	0.662201	0.148872	1.01134e-06	1.69341e-05
NME1	16.4882	0.55009	0.171765	0.000205793	0.00179964
ZNF516	19.2112	-0.00369772	0.121729	0.971494	0.988221
CDR2	18.6106	0.0114454	0.119995	0.912996	0.960544
CHMP1A	16.9831	0.346259	0.147312	0.00551035	0.0283596
ATAD1	15.169	0.510048	0.155773	0.000168966	0.00151403
HDAC2	18.4826	0.175875	0.128111	0.107628	0.272426
TENM3	20.0195	-0.0714676	0.117327	0.484421	0.692016
TYK2	17.8768	-0.0405375	0.120102	0.696852	0.840362
PGM5	19.1846	0.102693	0.129806	0.346919	0.567807
SMC1A	18.4187	-0.121239	0.123497	0.253258	0.470818
MAGT1	15.6074	0.115852	0.136096	0.304581	0.525871
ASAH1	13.8102	0.254687	0.15845	0.044856	0.145198
ZNF521	20.4007	-0.636359	0.18426	6.0539e-05	0.000617022
PITX1	18.2846	0.134363	0.13553	0.231658	0.446169
TTC31	16.7152	0.246714	0.136502	0.0320435	0.113812
ARPC1A	16.9431	0.103186	0.125949	0.338016	0.559408
ABL1	18.3854	-0.0222414	0.123694	0.833849	0.92007
COL27A1	19.3853	-0.468284	0.146876	0.000267832	0.00226582
FAM3A	18.5689	-0.236775	0.141268	0.0433429	0.141329
MYL5	12.7408	0.423747	0.178266	0.00333271	0.0187888
CREB3L1	17.1432	-0.120513	0.155077	0.314787	0.536985
GJC3	17.129	0.17275	0.135277	0.127589	0.304185
SRRM3	17.8633	-0.0324372	0.121407	0.756862	0.875955
NF2	18.6335	0.0238096	0.121452	0.820764	0.911944
MED13L	20.0469	-0.097174	0.123273	0.357941	0.57849
EEF1B2	16.6805	0.420696	0.160077	0.00184517	0.011441
EIF4A3	16.5183	0.165511	0.14023	0.152484	0.343811
STX4	17.6903	-0.0388691	0.122299	0.711357	0.850977
METAP2	16.7454	0.365678	0.143924	0.00296875	0.0171086
INF2	17.2785	0.102035	0.12766	0.348423	0.569
DKK3	17.2004	-0.31903	0.147599	0.00970908	0.0445429
DDX3X	16.9026	0.116793	0.133399	0.292817	0.513738
TUSC3	18.374	-0.0633579	0.133781	0.567296	0.758238
ZNF548	17.1414	-0.155994	0.137168	0.171542	0.367815
TRMT112	15.9774	0.249781	0.150869	0.04316	0.141121
NDEL1	17.5365	-0.178706	0.131622	0.108739	0.274281
SMARCC2	17.8926	-0.042879	0.126734	0.688981	0.834134
GATD3A	15.672	0.330337	0.146239	0.00730299	0.0355465
INPP4B	17.6747	0.378112	0.147069	0.00246617	0.0146779
KIF2A	17.4839	0.124805	0.126601	0.248078	0.465836
SCT	15.1116	0.0163886	0.133147	0.882718	0.946681
IMMT	15.1236	0.369485	0.152238	0.00382872	0.0210389
OLFML2B	21.7025	-0.795304	0.173973	5.0713e-07	9.12206e-06
YWHAQ	17.9184	0.10481	0.128372	0.338894	0.560223
NR4A1	15.8593	0.0558766	0.123458	0.598999	0.778559
ARF5	15.4037	0.18781	0.143976	0.110355	0.277081
MUC21	18.8619	-0.598934	0.143377	4.01825e-06	5.72561e-05
ODC1	15.3313	0.347395	0.169076	0.0106019	0.0477942
TXLNA	20.0661	-0.462727	0.138169	0.000161209	0.00145709
MFN2	13.4427	0.0676353	0.137242	0.550806	0.74582
IRF9	17.3298	-0.250673	0.143208	0.0354322	0.122379
TEAD2	20.4135	-0.322662	0.147608	0.00915363	0.0424773
PRR12	17.0663	0.0101368	0.123009	0.924234	0.965002
H1-2	16.6199	-0.25433	0.151529	0.0404872	0.134655
MSI2	13.1421	0.193385	0.151231	0.110131	0.276832
WDR26	16.9759	0.339091	0.142714	0.00514446	0.0268184
NBR1	15.3485	0.101806	0.140267	0.372398	0.591781
RCC1L	18.4782	-0.051471	0.125549	0.63023	0.798864
PPP6C	16.4521	0.349587	0.144758	0.00446676	0.0239203
KRTAP9-4	18.3195	-0.385199	0.142657	0.00175735	0.0110288
SLC44A2	16.4461	0.0131354	0.126333	0.903321	0.957502
ATG4B	18.6827	-0.207705	0.132656	0.0649732	0.191122
TFDP2	19.1564	0.169832	0.131658	0.124973	0.300423
USP14	17.124	0.0459624	0.129086	0.673253	0.823381
CMA1	17.6471	-0.417732	0.145695	0.000902572	0.00642408
ZNF334	18.6878	-0.387152	0.142609	0.00164152	0.0104365
ZNF146	17.1771	0.050972	0.122074	0.628915	0.798032
DHX15	17.0764	0.0103017	0.120969	0.921952	0.964143
NT5C2	16.3322	-0.0671095	0.126416	0.532988	0.731045
TAGLN3	15.6949	0.0476031	0.137426	0.675666	0.824837
FADS3	13.0556	0.194236	0.153588	0.112335	0.280144
MRPS34	15.5672	0.102965	0.129032	0.346799	0.567807
TSR3	17.5146	-0.0463719	0.131394	0.673591	0.823655
ERBB3	19.3615	0.308419	0.138183	0.00863649	0.0409253
UBE4B	15.5241	0.228155	0.138286	0.0487581	0.153854
KAT7	16.3773	-0.10432	0.134664	0.353671	0.574074
NICN1	18.6731	-0.491316	0.140153	7.99457e-05	0.000792585
NPTN	17.1258	0.181294	0.136501	0.111237	0.278362
RSRC2	16.5637	-0.124648	0.130088	0.257577	0.47622
GFPT1	17.2685	-0.139031	0.138744	0.222218	0.434451
TMEM248	17.5808	-0.0923256	0.127322	0.394917	0.615059
MTSS2	16.3501	0.155918	0.133589	0.163631	0.358622
RER1	17.2766	0.199868	0.132143	0.0738211	0.208691
ISCU	15.3892	0.0816976	0.130972	0.459808	0.673254
C1orf43	13.5026	0.272726	0.166962	0.0392845	0.132412
TMEM214	18.9263	-0.506532	0.146299	9.26374e-05	0.000901199
TMED10	15.4079	-0.0457234	0.131091	0.677211	0.825967
CAPN2	15.5412	-0.0160524	0.127482	0.881311	0.946043
PSMD6	15.622	0.213569	0.144992	0.0712266	0.204022
CCAR1	16.4929	-0.0658626	0.125233	0.538509	0.73646
SCX	20.012	-1.18726	0.174061	8.69466e-13	3.90025e-11
YY1	18.3622	0.238589	0.138258	0.0399467	0.133753
LUC7L2	16.9852	-0.0104791	0.123476	0.920946	0.96376
BMP1	18.3919	-0.686603	0.149896	5.24669e-07	9.41137e-06
IGF2BP2	18.254	-0.164035	0.138564	0.151473	0.342327
TMED3	17.1279	-0.0383491	0.125559	0.719462	0.856261
RPS6KB2	18.1017	-0.115914	0.125644	0.28	0.498838
MRPS24	14.61	0.219095	0.142493	0.0624698	0.185142
ACTR2	17.9056	-0.0286981	0.122993	0.786174	0.892411
MICALL2	17.9953	0.270523	0.259915	0.076969	0.214715
LRPAP1	17.1436	0.075306	0.126294	0.484213	0.691856
RPS27L	12.9968	0.64757	0.168935	1.51362e-05	0.000185489
ACAA2	15.578	0.246243	0.141761	0.0373403	0.127721
COQ9	12.9019	0.485912	0.167592	0.000648099	0.00486041
CRMP1	18.482	0.0493568	0.129356	0.652667	0.812799
VGLL3	18.7772	0.4493	0.158766	0.000824702	0.00597612
TCF25	16.7172	-0.14974	0.129488	0.172636	0.369744
SLC6A8	17.0025	0.436206	0.181765	0.00287341	0.0166944
PLPP3	15.9403	-0.156087	0.14415	0.186284	0.389338
GLIS2	16.2233	-0.360257	0.158103	0.0059877	0.0303013
RAB5C	15.7287	0.0242599	0.128789	0.824499	0.913637
CDC42EP3	15.768	0.189264	0.140199	0.102441	0.264455
NDUFB3	13.0624	0.660705	0.183422	3.46757e-05	0.000385303
ELOC	13.3344	0.290428	0.164927	0.027226	0.100636
FBRS	16.1657	-0.3584	0.157148	0.00610416	0.0308262
UBE2K	14.4949	0.0664269	0.135714	0.555131	0.749273
RAF1	16.2566	0.0994966	0.129193	0.361691	0.582666
SSBP3	16.2986	0.127822	0.132214	0.248749	0.466132
SETD3	14.8624	0.451162	0.165243	0.00113575	0.00772079
ACTR10	17.4887	-0.0451181	0.123649	0.669427	0.820913
AP2A1	14.6152	0.068982	0.13102	0.531484	0.730112
CLINT1	16.6002	0.100399	0.128125	0.355451	0.575904
CDRT4	17.2176	-0.11541	0.128502	0.289138	0.509618
LRTM1	16.0783	1.27675	0.23339	2.77291e-09	7.63285e-08
TRAM2	17.1719	-0.325358	0.142858	0.00727957	0.0354562
NEO1	16.9023	0.0101438	0.167476	0.932776	0.969495
SARS1	14.4732	0.330643	0.161247	0.0117723	0.0519425
CNIH1	15.529	0.304606	0.155874	0.017069	0.0702379
PUM1	17.9921	0.0659112	0.124443	0.535704	0.73369
COQ10A	10.1388	0.194064	0.173386	0.134956	0.316058
ATXN2	16.1991	-0.157893	0.130922	0.154616	0.346788
MED12	18.8948	-0.00896629	0.124589	0.932228	0.969409
HADHA	15.0753	0.227388	0.146351	0.0578555	0.175464
TMEM109	16.3273	0.231218	0.141435	0.0492151	0.154959
ZNF787	16.8285	0.0943376	0.130953	0.39254	0.612538
OLFML2A	16.2901	0.0811113	0.126655	0.451795	0.665427
GSK3B	16.1799	0.123524	0.131377	0.262614	0.481072
FH	14.5103	0.194039	0.146658	0.103387	0.265952
ZNF721	18.1623	-0.199225	0.13789	0.0846616	0.230339
STRN4	16.4847	0.122603	0.12747	0.259184	0.47831
AFG3L2	14.3087	0.507533	0.157427	0.000200258	0.00175546
OBSCN	14.7453	0.0471716	0.132563	0.670528	0.821634
TMEM165	16.2788	-0.313299	0.15206	0.0132335	0.0570729
SNX3	15.4471	-0.066034	0.140461	0.566057	0.757675
KDM2A	18.6062	-0.316201	0.148645	0.0105833	0.0477398
GSK3A	15.9986	0.257125	0.142506	0.0306503	0.109939
FTSJ3	17.7666	0.131298	0.128335	0.227381	0.440728
MZF1	17.9531	-0.125873	0.12792	0.246025	0.464018
SGCA	15.1033	0.0503601	0.138291	0.658241	0.815744
GNA11	16.4263	0.304151	0.150577	0.0146358	0.0620237
HCK	18.2061	-0.0109102	0.125556	0.918023	0.962249
WTAP	16.9203	-0.0996875	0.124779	0.35039	0.570654
RHOBTB3	16.6178	0.180981	0.133646	0.107006	0.271367
ZMIZ2	16.6849	-0.438294	0.162085	0.00140324	0.00916204
SLC66A2	17.6973	0.030675	0.128578	0.778113	0.888477
PLXNA1	19.3616	-0.0461078	0.120656	0.657264	0.815341
SCD	17.3392	0.0893802	0.123057	0.398769	0.618506
P3H2	17.4418	0.0340395	0.130524	0.756449	0.875955
TP53INP2	15.2287	1.03483	0.157512	4.39973e-12	1.84814e-10
ATP5PB	14.1221	0.28687	0.153095	0.0223443	0.0867394
CDK15	17.8136	-0.299511	0.142806	0.0125783	0.0548002
CAPN15	17.1348	-0.254806	0.145552	0.0352599	0.122133
GRK2	16.7896	0.262478	0.142749	0.0268883	0.0996925
CLIP3	14.7678	0.467478	0.154027	0.000439228	0.00346228
CCDC9	17.7436	-0.0810891	0.133646	0.465638	0.678763
HSPD1	15.631	0.187884	0.147808	0.116563	0.286074
ATP6AP2	17.7487	-0.209523	0.130759	0.0598132	0.179613
P3H1	18.8152	-0.63039	0.150688	3.62448e-06	5.20818e-05
GLUD1	17.1099	-0.0627325	0.124733	0.555949	0.74983
SPEG	16.994	0.546391	0.152178	4.88932e-05	0.000511233
LMF2	18.6325	-0.516561	0.144853	5.86501e-05	0.000600501
AFAP1L1	17.7203	0.893917	0.155498	6.90626e-10	2.08248e-08
KPNA1	16.0717	0.0507505	0.131972	0.644764	0.808379
PROSER3	16.1252	-0.496305	0.152179	0.000189635	0.0016765
ZFP1	17.4302	-0.131555	0.130774	0.231368	0.44575
GOLGB1	20.0288	-0.280525	0.143635	0.0188889	0.0761741
EGFL7	16.2834	-0.246369	0.147469	0.0426813	0.140029
CDK5RAP3	18.36	-0.163591	0.127619	0.132582	0.31231
DYNC1LI2	18.5515	-0.124168	0.122744	0.239828	0.456239
SRF	17.7688	0.166384	0.127034	0.125899	0.301055
CDH2	23.2792	-1.29269	0.172208	5.39476e-15	3.50033e-13
BAGE5	17.3014	-0.16758	0.141366	0.148093	0.337048
MYOF	17.2973	0.0526573	0.126994	0.625032	0.796023
VCAN	20.0488	-0.530018	0.139951	2.55369e-05	0.000295976
SRRT	17.6491	-0.43911	0.143876	0.000478422	0.00372237
ABCD1	18.3485	0.260287	0.132186	0.0209627	0.0824327
AKAP12	22.1486	-0.807197	0.151355	1.15942e-08	2.87559e-07
ADD1	17.5653	0.134042	0.132324	0.227157	0.440728
ARFGEF1	18.1407	-0.0238684	0.123055	0.820682	0.911944
CSNK2A3	16.2527	0.334557	0.150879	0.00760248	0.036758
PDLIM5	14.8077	0.286494	0.149446	0.020319	0.080508
CCDC110	17.0823	-0.709634	0.147651	1.7183e-07	3.43046e-06
ZNF706	14.8656	0.177906	0.138372	0.122417	0.296029
TNK2	16.5098	-0.121129	0.130588	0.271279	0.490306
RAB10	14.0742	0.308699	0.161188	0.0176125	0.0719044
PRPSAP1	16.2573	0.0366945	0.126385	0.732895	0.864181
ATP5MK	12.6245	0.441128	0.205298	0.005615	0.0287759
IRGC	17.3189	-0.155492	0.134387	0.167761	0.363942
CAB39	15.4915	0.340432	0.14444	0.00540698	0.0279066
CPSF7	18.3295	-0.152718	0.1306	0.165122	0.360559
SOX8	16.8011	-0.281194	0.143172	0.0193248	0.0774898
IDH3A	12.6894	0.26772	0.157823	0.0350003	0.121523
CECR2	16.0308	0.128536	0.140092	0.263036	0.481482
HYDIN	16.4261	0.00393169	0.126607	0.971159	0.988221
PLAGL1	16.7028	-0.478907	0.145779	0.000190286	0.0016802
UFM1	16.1809	-0.0850603	0.128841	0.434225	0.6518
RXRG	14.8981	0.538669	0.155054	7.80786e-05	0.000776824
FAM234A	16.5071	-0.0379116	0.125457	0.723309	0.859152
PDE4C	17.2266	-0.520038	0.152389	0.000102201	0.000981337
SUPT6H	16.4121	0.236771	0.135759	0.0390109	0.131918
CACNB1	16.672	0.333063	0.14988	0.00766157	0.0369944
DCHS1	20.5928	-0.812883	0.149441	6.08066e-09	1.56142e-07
TMEM258	16.0344	0.149142	0.134164	0.183127	0.384953
ORM2	17.91	-0.163997	0.129727	0.136349	0.318293
GBF1	16.6865	0.0400299	0.130031	0.713325	0.852749
ADAR	19.5725	-0.504866	0.140861	5.84587e-05	0.000600337
PPIAL4A	16.6346	0.12232	0.130792	0.266799	0.485371
RAB28	16.2026	-0.242311	0.14548	0.0427753	0.140211
PWWP3A	17.9519	-0.0570248	0.134385	0.609092	0.785701
PHACTR3	16.2344	-0.197661	0.16754	0.122864	0.296628
TRAP1	16.4752	0.243213	0.143993	0.0419185	0.138336
SEC23A	19.3063	0.0835799	0.131409	0.447793	0.661405
TEAD3	17.7119	-0.263322	0.137874	0.0237056	0.0910029
NIPSNAP2	13.609	0.145548	0.141576	0.208809	0.417165
ARRB2	17.8539	-0.233055	0.134426	0.0400748	0.133753
EIF4E2	14.4888	0.156105	0.144587	0.182662	0.384422
ZFC3H1	17.7981	0.00520734	0.125342	0.961495	0.984249
RPS4Y1	15.6285	0.234262	0.15045	0.0562384	0.171933
USP5	18.0844	0.0368802	0.119581	0.722265	0.858332
ACADM	13.7015	-0.0478619	0.132355	0.664779	0.819222
SIDT2	14.8281	0.167636	0.148869	0.159607	0.353617
NDUFS5	14.9861	0.621559	0.15405	6.9878e-06	9.33463e-05
YIPF3	15.3433	-0.00560668	0.125874	0.958014	0.982485
MAGEF1	15.7531	0.217571	0.142929	0.0664864	0.194586
IGF2BP1	18.2571	-0.199573	0.135088	0.0796606	0.219611
MLF2	15.2386	-1.64048e-05	0.126835	0.99948	0.999534
XPOT	16.1384	-0.0919609	0.131451	0.407399	0.626539
ATXN10	15.0852	0.221442	0.147234	0.0669877	0.195188
SPCS3	14.695	-0.180201	0.143016	0.126072	0.301369
KMT2E	15.9599	-0.208436	0.142522	0.076269	0.21309
ETF1	15.6489	0.527225	0.15745	0.000117605	0.00111136
GXYLT2	18.9237	-0.51138	0.157106	0.000198354	0.00174087
PRUNE2	15.9289	-0.0649463	0.175444	0.590717	0.773887
DCAF12	16.5261	-0.174274	0.140998	0.131505	0.310376
TMED2	15.5259	-0.0350593	0.126825	0.744322	0.870032
PHF10	16.5437	0.291149	0.14301	0.0150963	0.0635972
EDAR	16.8338	-0.525828	0.154659	9.86805e-05	0.000954875
EML1	16.0907	0.441941	0.148179	0.000563381	0.00432322
ANKRD10	15.7752	-0.781155	0.167604	3.4008e-07	6.30449e-06
SUMO4	15.8486	0.0594502	0.131715	0.592536	0.774871
SHROOM3	17.9774	0.324544	0.14891	0.0094436	0.043503
PRPF19	14.1612	0.244621	0.147176	0.0436137	0.141999
TMEM59	15.8135	0.397081	0.157761	0.00260715	0.0154034
ZC3H18	17.0305	0.0389543	0.123924	0.714352	0.853394
ABHD2	16.4061	0.0185414	0.129035	0.864949	0.935912
SARAF	15.7144	0.117367	0.131217	0.289206	0.509618
C19orf47	14.5367	0.405887	0.155018	0.00193477	0.011895
CHSY1	19.2598	-0.492624	0.17208	0.000682187	0.00507534
ARGLU1	15.6214	-0.723517	0.158167	5.89049e-07	1.03899e-05
SARDH	16.1401	0.0349705	0.128772	0.747746	0.871294
SRSF11	19.1472	-0.451067	0.135436	0.000178393	0.00158482
NCBP1	18.4025	0.120306	0.124176	0.260029	0.478872
GNB4	15.9881	0.231809	0.146789	0.0546033	0.167923
TXN2	13.8515	0.286775	0.167344	0.0299682	0.108084
CMIP	16.5997	0.37931	0.157029	0.003732	0.0206868
IL1F10	17.3087	-0.744801	0.150583	7.96201e-08	1.71183e-06
SSU72	15.9725	0.235547	0.144225	0.0486205	0.153553
HACL1	16.5827	-0.0297332	0.126438	0.781368	0.889582
ZNHIT1	16.3108	0.0267114	0.12669	0.804826	0.902851
SYNC	16.5747	0.555772	0.146398	2.12605e-05	0.000250406
CDC27	16.6255	-0.0755287	0.123856	0.477422	0.686063
CRIP1	12.8735	0.590446	0.171669	7.52889e-05	0.000754655
CSRP3	10.3883	0.29222	0.182077	0.0350242	0.121548
ARL15	16.575	-0.10196	0.137536	0.366088	0.58637
GALNT1	15.4615	0.215524	0.151861	0.0770433	0.214758
LZTS1	18.2395	0.222525	0.132006	0.0470956	0.149975
SAR1A	16.6286	0.0656659	0.124809	0.54015	0.737278
DCLK3	14.0445	-0.0625053	0.139549	0.580865	0.766645
CBX8	16.4356	-0.548521	0.150578	4.20161e-05	0.000453014
SF3B2	18.6597	-0.0022625	0.119679	0.982406	0.992287
[truncated: 6,048 more rows]

## Sheet: FIBER_teton_vs_cnt
Gene	baseMean	log2FoldChange	lfcSE	pvalue	padj
COL1A2	1611.08	-0.533834	0.201567	0.00106692	0.0149973
ACTC1	1255.08	0.687357	0.14759	3.75775e-07	2.30596e-05
MYH3	1128.4	0.517212	0.196057	0.000938933	0.0134635
MTRNR2L10	906.708	-1.81208	0.172304	5.93108e-27	6.76973e-24
ACTA1	811.436	-1.46444	0.2057	8.00413e-14	2.40419e-11
IGF2	677.999	0.959328	0.143656	1.46911e-12	3.64531e-10
NFYA	459.566	-0.959388	0.106002	1.31139e-20	8.31569e-18
COL1A1	176.188	-2.25363	0.349836	9.57e-12	2.02281e-09
COL3A1	142.861	-1.91833	0.351403	3.52976e-09	3.66261e-07
TPM2	404.578	-0.0506695	0.120878	0.61895	0.830164
MYL9	320.751	0.393335	0.166524	0.00358246	0.0360584
MYL1	302.083	0.588232	0.134946	1.49326e-06	6.71025e-05
MYLPF	304.302	1.03505	0.149218	2.08428e-13	5.9475e-11
ALDOA	218.332	-0.581862	0.154155	1.97911e-05	0.000603998
SPARC	196.245	-0.174033	0.13346	0.116319	0.364544
TNNC2	281.299	0.501553	0.16322	0.000245863	0.00470852
TTN	261.457	0.285864	0.165904	0.0268419	0.149305
TUBA1C	181.042	1.2749	0.172771	1.37137e-14	4.60376e-12
MEGF10	301.817	5.08419	0.286589	1.07715e-70	6.14728e-67
PRMT8	163.993	-1.10588	0.128557	6.89502e-19	3.57726e-16
TNNT1	212.604	0.167438	0.179551	0.17975	0.452507
VIM	163.175	-0.0685671	0.123451	0.509706	0.762923
TNNT3	222.542	-0.0120222	0.114119	0.903408	0.963296
TNNI2	185.864	-0.84994	0.144209	3.05976e-10	4.74057e-08
ACTN2	210.24	-0.0166131	0.129094	0.87359	0.952548
MYBPH	166.231	0.708894	0.15449	5.10808e-07	2.88632e-05
TPM1	220.899	0.817978	0.167391	6.36161e-08	4.90618e-06
LENG1	136.223	-0.508406	0.123086	5.3992e-06	0.000191386
TET3	119.365	-0.583275	0.127487	6.47821e-07	3.39185e-05
THBS4	137.571	0.162333	0.203981	0.203674	0.481511
POSTN	107.538	-0.400564	0.266604	0.0200311	0.123453
TNNC1	167.841	0.90009	0.160472	1.14084e-09	1.32873e-07
PAGE5	156.562	0.825099	0.223001	1.26522e-05	0.000419802
TMEM106C	83.9608	-0.263263	0.122802	0.0125107	0.089865
SMIM17	145.94	-0.228934	0.146593	0.0518055	0.22432
NHLH2	113.071	0.0185528	0.114353	0.852634	0.941686
DUX4	122.516	0.194932	0.105333	0.0370054	0.183643
TPM3	145.766	0.0121991	0.132447	0.911761	0.965652
GNAS	150.691	-0.246431	0.113098	0.0131085	0.0927018
MYL4	145.454	1.56201	0.137969	4.55617e-31	8.66736e-28
APOBEC3A_B	88.0774	-0.592694	0.141842	3.59864e-06	0.000136009
ZNF140	97.0906	-0.518924	0.113905	7.44474e-07	3.72694e-05
SP7	78.8543	-0.174334	0.163825	0.155637	0.419765
ATP2A2	124.059	0.984195	0.207887	1.13117e-07	7.96987e-06
CKM	137.324	-0.193733	0.153548	0.104001	0.342884
FN1	88.2814	-0.954736	0.213587	6.11736e-07	3.29682e-05
CRYAB	121.869	0.582453	0.156518	2.05493e-05	0.000623802
IL32	121.176	1.43323	0.192759	9.94726e-15	3.54806e-12
DES	130.446	0.40162	0.157079	0.00199749	0.0237881
FAM13B	98.1786	-0.946574	0.146097	9.51725e-12	2.02281e-09
PEG10	126.637	2.62475	0.231898	2.69534e-31	7.69114e-28
RPL37A	96.14	0.903769	0.172534	1.03804e-08	9.7116e-07
MYL6B	110.947	0.504547	0.199088	0.00137038	0.0180609
EEF1G	92.2715	0.457474	0.127681	6.14303e-05	0.00157965
NEB	129.146	0.0122337	0.140515	0.912505	0.965814
EIF3A	88.8757	-0.0213975	0.108254	0.821178	0.928946
LYRM2	68.5158	-0.186959	0.135592	0.091951	0.32076
ADAM15	58.8312	1.64154	0.538927	0.324634	0.618593
PDE7A	71.5627	-0.771468	0.138937	2.8632e-09	3.14236e-07
MYH1	120.079	-2.63088	0.268394	8.38789e-24	7.97829e-21
COL5A2	76.786	-0.62125	0.242413	0.00105879	0.0149567
PDCD4	65.5368	-0.307347	0.133863	0.00684406	0.0587372
MYH8	132.397	-0.200188	0.185286	0.126277	0.376857
NES	91.9086	0.927337	0.218087	1.40969e-06	6.385e-05
FSTL1	78.4337	-0.318212	0.165346	0.0157705	0.104532
RPL41	81.5468	0.69503	0.224415	0.00014923	0.00325059
SIGIRR	89.5137	-0.35904	0.131229	0.00151667	0.0193206
IL24	61.3806	-0.593991	0.139595	2.361e-06	9.69369e-05
RPS3A	68.5527	0.912044	0.187387	1.10705e-07	7.89744e-06
MYOG	83.6557	0.8416	0.146531	9.66444e-10	1.14906e-07
EIF4G2	84.7805	0.0351157	0.113472	0.720933	0.885762
ACTA2	96.2355	-0.96895	0.152167	1.18911e-11	2.42366e-09
HNRNPA2B1	74.1467	-0.147683	0.118377	0.145008	0.406477
DCN	66.1772	0.0568992	0.128063	0.596212	0.818716
ENO3	92.1218	0.690833	0.188677	1.80734e-05	0.000557539
NCK1	95.2772	0.263718	0.196766	0.0539423	0.229933
DLK1	93.3702	1.53647	0.231297	1.54167e-12	3.66597e-10
MB	72.6663	0.184046	0.174315	0.140966	0.400869
RTN4	79.3107	0.455019	0.169545	0.00119261	0.0164401
RPL7A	69.7281	0.5296	0.162649	0.00015153	0.00328814
HSP90AB1	85.6002	0.30255	0.14056	0.0107155	0.0801489
HNRNPA1	62.3262	0.218392	0.120773	0.035672	0.179683
COL6A2	73.0989	-0.0822069	0.15622	0.47939	0.739627
IGFBP5	68.2446	-0.626156	0.175955	4.14796e-05	0.00114359
ZNF106	77.6117	1.24516	0.182911	1.20455e-12	3.12471e-10
ETV3	58.9374	-0.341366	0.130821	0.00246752	0.0273511
FLNC	94.4402	0.210804	0.185441	0.103912	0.342788
GOLGA8A	71.9659	-1.1213	0.155401	3.69996e-14	1.17309e-11
RPL32	64.4898	0.438868	0.183703	0.00275682	0.0296852
PTBP1	66.1049	0.274655	0.280994	0.0634447	0.256611
GPC1	75.3733	0.939625	0.14406	8.4079e-12	1.91936e-09
STBD1	61.1443	-0.635361	0.14444	1.26753e-06	5.83371e-05
CKB	74.3057	0.809863	0.178235	5.59256e-07	3.09871e-05
PDE4DIP	83.4092	-0.039768	0.126207	0.702106	0.875932
DDX17	58.5587	-0.522702	0.154468	8.47997e-05	0.00210946
TPI1	83.6017	0.821423	0.178991	2.47814e-07	1.62561e-05
MYH7	101.486	-0.00550607	0.175329	0.958545	0.983545
DYNC1H1	66.3463	-0.326295	0.124455	0.00264922	0.0288532
RPS12	61.9615	0.792432	0.233695	4.55888e-05	0.00123204
SRL	85.846	0.0369445	0.13443	0.732642	0.891702
RPL34	61.1664	0.382058	0.181667	0.0072405	0.060847
PLEC	78.6565	-0.32454	0.120997	0.00215028	0.0247695
MEPCE	50.0192	-0.391142	0.144227	0.00155691	0.0197891
BIN1	84.2214	0.231306	0.143357	0.0464992	0.209118
NACA	66.7458	-0.0234605	0.114232	0.810557	0.923324
TUSC2	50.3593	-0.612502	0.142026	1.94921e-06	8.30158e-05
RPS17	59.2696	0.57595	0.199126	0.000419709	0.00721611
TMEM30A	57.8306	-0.466518	0.144315	0.000223473	0.00439779
FTH1	53.9259	-0.34673	0.152005	0.00566933	0.0504756
COL6A1	38.2272	-1.02194	0.29917	3.55095e-05	0.0010161
RPL17	62.6098	0.528645	0.212742	0.00146591	0.0189275
RPL6	57.5273	0.959434	0.170378	2.02893e-09	2.27041e-07
JPH4	63.9142	-0.481242	0.130619	4.10643e-05	0.00113764
TNFAIP8	87.3686	-0.805865	0.163286	5.85933e-08	4.64434e-06
COL5A1	29.5918	-1.28006	0.287259	4.54838e-07	2.64873e-05
TMSB10	63.7237	0.507665	0.2099	0.00193217	0.0233127
CD63	62.6717	0.52803	0.160817	0.000143165	0.00316683
FHL1	75.299	-1.22789	0.206686	1.79489e-10	3.01277e-08
CDKN1A	77.5646	1.37073	0.180919	3.55515e-15	1.44923e-12
TNC	35.8363	-0.0149365	0.178706	0.891803	0.96049
CCDC47	47.1655	-0.679071	0.150419	6.01672e-07	3.29682e-05
RPL7	54.0956	0.844015	0.169902	6.60502e-08	5.02598e-06
RPL4	56.7143	0.0567795	0.119693	0.5793	0.806948
AAMP	51.5577	-0.629737	0.1381	5.53737e-07	3.09822e-05
UBE2Z	47.4777	-0.59072	0.160969	2.72088e-05	0.000808755
RPS23	54.22	0.959637	0.176443	5.58625e-09	5.49667e-07
RPS24	53.5599	0.629361	0.162079	1.32465e-05	0.000436981
SLN	75.6469	0.215902	0.170114	0.085734	0.305513
ANKRD36B	49.5249	-0.498795	0.128349	1.48688e-05	0.000482137
RPS28	49.7892	1.10941	0.209834	7.63914e-09	7.2661e-07
MARCKS	58.109	-0.159211	0.125507	0.133511	0.390542
HSPA8	66.284	0.711948	0.162693	1.08471e-06	5.07415e-05
TESC	67.5233	0.163	0.162821	0.179972	0.452668
TUBB6	63.1606	1.72741	0.190684	1.97904e-20	1.12944e-17
RAD23B	53.0756	-0.233866	0.119865	0.0231941	0.13491
AK1	69.8494	0.330073	0.173745	0.0138988	0.0967502
RPS8	47.3777	0.534023	0.19189	0.000706967	0.0108459
MAGEA3	44.4716	-0.580198	0.152183	1.42719e-05	0.000468103
MYBPC1	71.395	-0.189902	0.179526	0.134769	0.393155
RPL5	50.5309	0.395316	0.142798	0.00138298	0.0181025
MAZ	49.7155	-0.406918	0.123939	0.00020626	0.00411582
ITM2B	56.5054	-0.274302	0.147255	0.0229384	0.134404
RPL9	52.0843	0.458734	0.169204	0.00108076	0.0151173
RPL29	53.1488	0.707407	0.201195	4.08162e-05	0.00113628
BASP1	41.7029	-0.233254	0.129759	0.0316432	0.166902
RPL35	53.079	0.616259	0.186578	9.58103e-05	0.00232676
SERBP1	56.1248	0.398686	0.137835	0.000865622	0.0127322
PCBP1	58.7298	-0.302409	0.143626	0.0102577	0.0774349
JPT1	67.9771	1.50818	0.195915	9.42855e-16	4.13913e-13
PKM	56.5716	0.0876979	0.136377	0.428091	0.702448
CASQ2	71.0152	0.554786	0.190978	0.000401935	0.00704449
FUS	51.16	-0.0772401	0.125073	0.454931	0.724411
PFN1	54.3375	0.729715	0.169389	1.7487e-06	7.6182e-05
RPS4X	44.7401	0.499547	0.180396	0.000837409	0.0124132
ZNF506	37.3017	-0.0659952	0.128989	0.53406	0.776728
QKI	56.4636	-0.534901	0.159533	8.72801e-05	0.00215631
MAGED2	60.0365	0.503784	0.174066	0.00049882	0.00834829
PDLIM3	62.1929	0.0645419	0.13425	0.553692	0.79077
CA3	53.8524	-0.614896	0.312541	0.00387676	0.038146
NFE2L1	59.6513	0.111871	0.133922	0.312125	0.60465
HSPB1	68.294	0.627162	0.187314	6.84701e-05	0.00174446
RPS6	45.3031	0.398162	0.163966	0.00320788	0.0332257
TTYH3	38.6965	-0.264967	0.146247	0.0259439	0.146162
PRELID3B	35.5826	-0.241751	0.151697	0.0450901	0.206524
TMSB4X	35.7405	0.522879	0.237267	0.00318034	0.0330003
TASOR2	39.0596	-0.352149	0.146498	0.00375351	0.0374498
RPL38	50.6666	0.355839	0.188179	0.0130812	0.0926231
SPTAN1	44.9006	1.05189	0.178469	4.71818e-10	6.41111e-08
PDLIM7	45.0404	0.227017	0.148712	0.0561692	0.2364
RPSA	44.6989	0.1489	0.149566	0.204494	0.481945
RPL37	47.4146	0.768574	0.188376	4.48875e-06	0.000162265
FABP1	35.5448	-0.171112	0.152091	0.143956	0.405904
DUX5	38.6989	-0.208192	0.137614	0.0648464	0.260408
LDB3	54.3646	0.169593	0.147052	0.139922	0.399068
STAC3	53.9853	0.841836	0.171514	9.59214e-08	6.92941e-06
SPTBN1	49.7242	0.631322	0.17752	4.73297e-05	0.00126812
ACTN3	64.6845	0.527866	0.184131	0.000503468	0.00837694
RPL19	43.8732	0.363582	0.175792	0.00908721	0.0710534
AHNAK	46.491	-0.423775	0.147503	0.000740358	0.0112673
RUVBL2	45.2788	-0.407903	0.146132	0.000907135	0.0130404
ACSF2	49.6395	-0.508063	0.130297	1.26212e-05	0.000419802
AK8	51.5024	-1.60812	0.148534	1.4274e-28	2.03654e-25
ATP5F1B	53.5847	0.540868	0.187442	0.000462094	0.00787215
PCBP2	44.5994	0.0585055	0.118431	0.562474	0.79804
RPL21	43.9191	0.757613	0.17955	2.68878e-06	0.000108062
CHRNA1	55.2008	0.955066	0.174728	3.36119e-09	3.55228e-07
LRRN1	43.2847	0.779328	0.209025	1.66593e-05	0.000522389
IFITM2	37.3311	-0.382548	0.16192	0.00366711	0.0368454
RPL27A	39.3131	0.966611	0.210839	3.89822e-07	2.35824e-05
LMNA	51.0615	-0.0546019	0.135694	0.616347	0.829026
RPL18	48.5982	0.685861	0.189111	2.61656e-05	0.000781817
SERPINF1	44.0806	-0.250565	0.158262	0.045601	0.207135
MAGED1	48.3137	1.03486	0.211866	6.86875e-08	5.15789e-06
IGFBP4	39.8618	-0.878782	0.149075	3.69922e-10	5.27786e-08
C12orf57	48.4698	0.267829	0.163538	0.0359155	0.180549
STMN1	50.6652	1.19416	0.204311	3.41677e-10	4.99987e-08
RPS18	42.8247	0.787936	0.196601	5.70314e-06	0.00019968
APP	44.1871	-0.22049	0.167229	0.0840981	0.301859
RPL15	41.4394	0.36542	0.20684	0.0150709	0.101426
CSDE1	50.1319	0.0235788	0.113776	0.81236	0.923903
MACF1	43.4456	0.556963	0.17773	0.000219204	0.00433606
RTL8C	41.6979	0.822061	0.172005	1.76207e-07	1.19716e-05
ANXA6	47.732	0.330381	0.17698	0.0153912	0.102734
PALLD	40.2589	0.682858	0.213923	0.000155111	0.00335311
RPL13	36.9762	1.0569	0.20881	4.19086e-08	3.46627e-06
RPL26	39.4308	0.594706	0.211905	0.000568535	0.00921769
ZNF723	30.242	-0.15068	0.140604	0.181464	0.454217
H4C1	37.1266	-0.536368	0.196685	0.000791289	0.0118527
HSPB8	61.6648	-0.101148	0.153037	0.376629	0.663133
RPS15	41.1238	0.368844	0.188	0.0108018	0.0805829
CNN3	44.4096	-0.219182	0.130037	0.0434895	0.203438
MYH9	42.6326	-0.405109	0.151121	0.00139453	0.0182118
CAPNS1	44.6202	0.0560152	0.130249	0.601079	0.821044
COL6A3	21.2217	-1.31711	0.213465	3.09775e-11	5.89296e-09
PHAX	30.8182	-0.277133	0.157836	0.0254452	0.143635
LDHB	45.0574	0.459833	0.174071	0.00136366	0.0180148
CACNA2D1	50.014	0.683947	0.17719	1.47977e-05	0.000482137
CCDC88B	33.8976	-0.77309	0.152827	3.57294e-08	3.04339e-06
KIF1B	48.6711	-0.132433	0.14671	0.241176	0.525742
HNRNPU	44.1348	0.00720137	0.125282	0.948767	0.979371
TMA7	42.5189	0.3882	0.296413	0.0238741	0.13721
GAL3ST2	48.1113	-1.43857	0.148477	3.74423e-23	3.05262e-20
RACK1	38.521	0.424163	0.164009	0.00195334	0.0234196
PTMA	32.3384	-0.152479	0.15436	0.193912	0.469011
ITPRID2	38.6155	-0.345592	0.137171	0.00280517	0.0300358
EIF3C	43.3894	0.572953	0.180758	0.000192537	0.00389649
SIGMAR1	35.7113	-0.172162	0.132561	0.113215	0.359355
RPS11	36.0364	0.143064	0.157268	0.229894	0.512302
SRSF5	36.5141	-0.463665	0.158872	0.000529149	0.00870274
NAP1L1	39.9931	0.575056	0.170595	0.000112084	0.00266525
MZT2B	40.5476	0.29731	0.243285	0.0484371	0.214196
RPS14	35.7927	0.488896	0.241771	0.00485495	0.0446891
ATP2A1	49.2913	-1.09379	0.193245	7.2006e-10	8.74337e-08
CANX	47.0242	0.232101	0.161727	0.0651721	0.260825
RPS3	35.5922	1.21015	0.258571	2.78489e-07	1.77499e-05
RCN1	41.8005	0.145036	0.13751	0.196619	0.473462
INPPL1	40.7599	-0.118098	0.129338	0.271743	0.564986
RPL10A	34.1908	0.835715	0.197732	2.45312e-06	9.92904e-05
HNRNPA3	44.8511	-0.32008	0.146614	0.0076805	0.0633419
RPS20	33.2376	0.566432	0.203844	0.000705191	0.0108459
CFL1	42.601	0.201835	0.134547	0.0728137	0.279642
MAPKBP1	31.8155	-0.267685	0.158264	0.0324041	0.169452
RPS27A	36.3429	1.04508	0.218975	1.59601e-07	1.0974e-05
SFRP4	23.9847	-1.07228	0.190494	1.56636e-09	1.78785e-07
MYL6	38.2557	-0.313794	0.147313	0.00915225	0.0712577
B2M	37.4701	-0.219971	0.142878	0.0553524	0.234692
R3HDM4	34.4477	0.368103	0.196442	0.011911	0.0869287
FAM3C	32.2955	-0.326991	0.149532	0.00794141	0.0647446
MORF4L1	39.3422	0.066628	0.123573	0.524606	0.770885
RPL30	35.1788	0.204701	0.153238	0.0910175	0.31926
EEF1D	38.3085	0.445935	0.169403	0.00151567	0.0193206
NPNT	35.9886	0.605488	0.196012	0.000275592	0.00519077
SETD7	43.4389	0.833022	0.191529	1.78113e-06	7.64278e-05
MYADM	39.0729	0.59283	0.193173	0.00025492	0.00484943
CCDC8	35.8871	0.446243	0.186056	0.00284053	0.0301879
MEST	34.4972	-0.789057	0.191775	3.38498e-06	0.000130528
DMPK	49.1513	0.230136	0.160248	0.0649429	0.260456
TMEM50B	28.339	-0.147168	0.148414	0.201868	0.479227
PPIA	38.272	0.384351	0.162631	0.00414508	0.0401629
RPS2	35.2822	0.829403	0.221989	1.63472e-05	0.000518297
HRC	46.3166	1.10031	0.21935	4.17046e-08	3.46627e-06
BIRC5	26.9681	-0.0495786	0.141843	0.651329	0.849631
TMEM213	30.2263	-0.171832	0.143841	0.135589	0.393656
ZNF587	27.4048	-0.173534	0.162966	0.155454	0.419667
SRRM2	33.688	-0.271302	0.143828	0.0204792	0.124866
PRKACA	42.8854	-0.0101616	0.136059	0.923883	0.971013
MARCKSL1	36.1749	0.887771	0.190326	3.2114e-07	1.99212e-05
OGN	26.3474	-1.54252	0.182937	1.50402e-18	7.15287e-16
RPL8	34.2655	0.787018	0.193281	4.68972e-06	0.000168328
TNNT2	40.6056	0.359196	0.160113	0.00668411	0.0577973
RPRD1B	31.5181	-0.549448	0.162178	8.1555e-05	0.00205944
THEM5	27.5226	-0.40597	0.174783	0.00377476	0.0375376
KRT28	29.4831	-0.360318	0.161998	0.00589007	0.0521966
RPL31	34.3121	0.708012	0.230099	0.000191017	0.00388876
TCAP	47.1603	-0.0123891	0.139513	0.907796	0.964637
MEF2C	44.0906	-0.0103349	0.133536	0.909722	0.965016
EIF4G1	38.1904	0.308242	0.198858	0.0322493	0.169005
DVL1	37.94	-0.0528921	0.133733	0.621126	0.830988
ARF1	37.2209	0.0580286	0.125825	0.587357	0.812617
MUSTN1	46.9349	0.510558	0.171568	0.000407152	0.00710586
PPP1R14B	38.0513	0.4098	0.161487	0.00251689	0.0276761
RPL28	31.9934	0.742833	0.224557	9.03934e-05	0.0022046
EIF4A1	36.7479	0.0533009	0.130064	0.62176	0.831128
ITM2A	46.3778	-0.42032	0.187683	0.00435932	0.0416031
SYNPO2L	42.875	0.635637	0.174773	3.07462e-05	0.000895248
SELENOW	37.886	0.63347	0.20162	0.000173895	0.00363524
YWHAZ	36.4861	0.205171	0.152823	0.0907416	0.318488
C4orf46	27.569	-0.102662	0.152402	0.370059	0.658332
RPS5	32.3802	0.71058	0.206159	5.82534e-05	0.00151115
DDX5	32.0338	-0.121636	0.145349	0.282465	0.576818
STK25	36.1185	0.111493	0.136845	0.314861	0.607476
ELK1	30.8816	-0.567903	0.150417	1.62706e-05	0.000518297
NPM1	34.5948	0.707587	0.179326	9.73182e-06	0.000330592
NFIX	35.1513	-0.784107	0.166446	1.84497e-07	1.22433e-05
OLFML3	35.9296	-0.668753	0.150851	7.38476e-07	3.72694e-05
POLR2E	32.986	0.0346517	0.131129	0.74687	0.898669
MYOT	37.4537	-0.153224	0.158422	0.194327	0.469528
ATP5F1A	39.5556	-0.159202	0.153568	0.171589	0.441504
TLE5	33.584	0.0621684	0.140033	0.574976	0.804065
HDLBP	34.6071	0.270289	0.161964	0.0353935	0.178595
LGALS1	29.2073	-0.129563	0.154185	0.264856	0.556529
S100A6	30.8527	-0.244336	0.164898	0.0539479	0.229933
UBA52	33.4152	0.299897	0.187283	0.0309038	0.163911
RDH13	35.4807	-0.518569	0.156715	0.000134305	0.00299405
TOMM34	31.754	-0.33185	0.152101	0.0070272	0.0595951
OBSL1	35.142	0.471064	0.17604	0.0012891	0.0173512
FNDC5	30.4148	0.911244	0.203768	9.18095e-07	4.36631e-05
ARRDC1	29.206	-0.0608187	0.134607	0.573065	0.803646
MYL12A	40.4925	0.13273	0.149591	0.253454	0.540532
ITGB1	33.0339	0.4329	0.198748	0.00491506	0.0450245
NBPF15	26.0492	-0.3687	0.173336	0.00684426	0.0587372
CIRBP	31.4571	0.226818	0.167549	0.0754416	0.285724
CFDP1	34.0916	-0.646558	0.145386	8.04505e-07	3.95803e-05
DBN1	33.6774	0.997363	0.206811	1.46878e-07	1.02224e-05
MAP4	35.2072	0.22809	0.158586	0.0653241	0.260914
CLTB	33.8388	0.00854351	0.126899	0.936931	0.976098
TRIM17	35.6845	-0.235182	0.143906	0.0417028	0.198497
MEGF8	28.2935	-0.124653	0.149309	0.277751	0.572042
EGR1	34.3887	-0.898247	0.201065	6.45327e-07	3.39185e-05
TUBB4B	37.9657	0.145368	0.134773	0.193949	0.469011
MRFAP1	35.9779	0.0865429	0.133506	0.417544	0.69784
EBI3	32.9351	-0.404646	0.180632	0.00467255	0.0437869
NREP	39.5264	0.263016	0.168224	0.0425201	0.200382
CFL2	45.048	0.111039	0.144571	0.321247	0.614947
HSPG2	39.2735	0.53348	0.19467	0.000882285	0.0128449
HNRNPCL3	26.9422	-0.181952	0.153054	0.12681	0.37736
UNC45B	37.4775	0.743364	0.194645	1.24128e-05	0.000416703
ERF	30.9377	-0.52219	0.163234	0.000160672	0.00343428
NCL	30.295	0.630403	0.197858	0.000191474	0.00388876
NBPF12	25.8716	-0.0366446	0.140122	0.737603	0.894877
RNF181	31.4867	0.661376	0.22869	0.000336421	0.0061309
EIF5A	35.9986	0.105806	0.147144	0.359894	0.650178
PTP4A3	25.8044	-0.536954	0.167193	0.000165544	0.00349983
DCX	34.593	1.34608	0.22385	2.25543e-10	3.67765e-08
MYOM1	41.1596	0.455647	0.225237	0.00558084	0.0500784
CHD4	32.8303	0.645548	0.198241	0.00014549	0.00319351
KREMEN2	30.0282	0.542036	0.21382	0.00142614	0.018541
PLD3	30.9246	0.190759	0.162258	0.123447	0.373592
PHC2	33.9675	-0.545154	0.152642	4.19534e-05	0.0011511
CTNNB1	32.0409	0.519963	0.20521	0.00143676	0.0186355
SRSF1	31.3805	-0.19731	0.150671	0.0931359	0.32292
MYOM3	41.0107	0.0871034	0.155021	0.446856	0.716207
P4HB	31.9442	0.595519	0.201887	0.000387586	0.00682702
SVIL	35.174	0.242821	0.164923	0.0573226	0.23941
NME2	31.7622	0.614921	0.2184	0.000486792	0.00817095
CALR	27.7991	0.554188	0.224521	0.00171493	0.0215101
CALU	36.6041	0.0679357	0.146408	0.552057	0.789622
PTMS	23.1076	-0.6683	0.19655	5.8017e-05	0.00151115
MMP14	23.3237	-0.98541	0.183677	4.23148e-09	4.23667e-07
CHPF	34.288	0.777285	0.192256	5.53924e-06	0.000195138
STIP1	39.1907	0.396583	0.166015	0.00357002	0.0360584
LDHA	33.628	0.192147	0.202829	0.145219	0.406477
ENAH	32.8238	0.573202	0.191146	0.000349327	0.00630888
SLC25A3	31.4407	0.856672	0.190341	7.59599e-07	3.76959e-05
GYS1	39.4432	0.352456	0.162503	0.00730474	0.0612026
CCNI	28.1877	0.0691639	0.136973	0.533854	0.776626
LENG8	26.2258	-0.422113	0.170038	0.00214355	0.0247636
CHRND	26.1535	0.113173	0.15804	0.339561	0.632465
RPL27	30.1093	0.271014	0.167952	0.0383589	0.186946
SMYD1	38.4415	0.670733	0.188253	3.3439e-05	0.00096382
HSPA5	30.6131	0.10359	0.164114	0.39064	0.677933
PFKM	37.6478	-1.04426	0.180566	3.07344e-10	4.74057e-08
RPL26L1	35.3926	0.444183	0.243833	0.00909023	0.0710534
HMGB1	31.494	-0.124135	0.134866	0.254136	0.541582
RASL10A	29.5268	0.290066	0.268621	0.0597448	0.246361
RPS13	31.3425	0.144597	0.165629	0.235166	0.517801
SEPTIN7	31.6418	0.137241	0.144277	0.234271	0.517801
SKI	33.866	-0.340334	0.148905	0.00566909	0.0504756
MYL3	29.2845	-0.0519887	0.209217	0.574941	0.804065
TUBB2A	34.2626	1.30759	0.212556	6.98483e-11	1.2457e-08
BTBD6	27.8808	-0.364225	0.157648	0.00433007	0.0415323
UQCRC2	31.4901	0.123562	0.146391	0.283588	0.577682
BTF3	29.0295	0.0738586	0.140992	0.509474	0.762923
RPS27	28.9235	0.267217	0.205851	0.0589933	0.244144
CCND2	24.8762	-0.0943959	0.156681	0.422066	0.700539
FIZ1	24.8541	-0.25303	0.164101	0.0449848	0.206347
RPL22	30.2019	0.45164	0.204877	0.00450086	0.0423868
CDC37	33.3447	0.0597964	0.129067	0.576102	0.804815
RNF167	23.1675	-0.50026	0.17398	0.000519951	0.00860105
MAP4K4	30.4937	0.394608	0.196844	0.00866263	0.0691103
HSPA9	35.4631	-0.175768	0.134385	0.10898	0.350591
EPC1	25.2712	-0.357207	0.176521	0.00885838	0.0696346
CLSTN2	32.042	0.555805	0.230737	0.00200612	0.0237881
RPL24	30.8758	0.163768	0.159674	0.176195	0.448304
ATP1A1	31.7692	0.901786	0.21596	3.03879e-06	0.000118783
TRIO	35.1764	-0.0178928	0.12794	0.865223	0.948265
RPL18A	28.2812	0.290707	0.241924	0.0529102	0.227721
BLCAP	28.2184	0.054913	0.138488	0.620355	0.830938
PYGM	32.0845	-1.09426	0.189828	4.31355e-10	6.00426e-08
ZNF391	28.0487	-0.403485	0.188665	0.00600548	0.0528909
GABARAP	26.3645	-0.0221006	0.14026	0.840817	0.937398
NPIPA1	23.5504	-0.50157	0.181053	0.000675642	0.0105082
ITM2C	23.1883	-0.111006	0.152616	0.336486	0.629615
PRRC2B	24.1945	0.0884408	0.151619	0.444802	0.71512
DDB1	34.8835	0.00170103	0.129544	0.988499	0.995954
RPS19	29.0259	0.924375	0.224477	3.44738e-06	0.000132042
RAPSN	31.7909	0.569525	0.180925	0.000234403	0.00455014
HNRNPDL	24.8909	0.0684073	0.141954	0.542585	0.782546
FAM171A2	31.3601	0.448544	0.186105	0.0027667	0.0297313
FKBP9	30.5945	-0.0428452	0.140425	0.697012	0.87419
YBX1	28.4396	0.464833	0.214288	0.00451484	0.0424484
NUCKS1	28.7062	-0.155574	0.149981	0.179923	0.452668
DYNLL2	31.5164	-0.0842559	0.136893	0.441086	0.713312
HNRNPL	24.4317	0.649654	0.203296	0.000180465	0.00374515
HNRNPC	28.7572	0.267959	0.164182	0.0391754	0.189952
ATP5MC2	26.3813	0.71297	0.219708	0.000133114	0.00297914
PRKAR1A	29.8057	0.245153	0.174508	0.0606302	0.248933
PTP4A2	33.1981	-0.510194	0.150187	8.76649e-05	0.00215648
ATF4	27.0368	-0.273095	0.155796	0.0260803	0.14664
ZNF383	23.1065	-0.067554	0.147092	0.546863	0.785144
MYOZ1	31.47	-0.337379	0.16781	0.0100114	0.0759772
NPIPB6	21.5954	-0.234103	0.182633	0.0740207	0.282566
CTNNA1	29.2179	0.241275	0.167791	0.0623772	0.253191
TCEAL7	35.4135	0.210188	0.176046	0.102698	0.340357
KPNB1	30.1811	0.204578	0.15799	0.0962443	0.327969
KLHL41	35.6167	0.0382674	0.146021	0.734707	0.892655
VCP	32.7033	-0.169368	0.154536	0.153657	0.417979
CYCS	30.3503	0.213328	0.162219	0.0888454	0.313957
TRAK1	32.045	0.295375	0.181489	0.0300527	0.160741
PPP1CB	29.5138	-0.153403	0.138864	0.16788	0.437501
VDAC1	28.7735	1.00837	0.220876	4.3109e-07	2.56274e-05
RYR1	30.7527	0.17094	0.170609	0.170353	0.439513
CDH15	27.3779	0.923041	0.217129	2.08823e-06	8.76289e-05
PSMG3	25.1288	-0.0861492	0.143498	0.44857	0.717851
RPS9	24.9058	0.751551	0.225839	8.50143e-05	0.00210946
NBL1	22.7809	-0.942584	0.164615	6.41889e-10	8.20162e-08
ATP5MC3	29.5792	0.00399262	0.140675	0.97239	0.989027
SULT1C4	24.5622	-0.71319	0.164368	1.06295e-06	5.01345e-05
SERPINH1	27.8041	0.0458494	0.140752	0.680266	0.867549
CACNA1S	31.1208	-0.321299	0.164322	0.0127304	0.0908153
LAMB1	27.9691	-0.059721	0.144822	0.595168	0.817873
CTTN	27.8371	-0.0169731	0.13434	0.872284	0.95184
MALRD1	22.6868	-0.254762	0.167798	0.0448591	0.206347
PGK1	30.7461	-0.0420863	0.137454	0.696455	0.87419
ARMCX3	27.0957	0.810567	0.213539	1.59322e-05	0.000510816
ZNF470	23.424	-0.454057	0.188064	0.00213227	0.0246832
CAPN6	30.149	0.968329	0.215871	6.67993e-07	3.46567e-05
TMEM132A	26.7421	1.19924	0.231411	2.39689e-08	2.08332e-06
EIF4A2	28.1944	-0.180613	0.150638	0.12334	0.373592
PABPC1	26.2819	0.547001	0.208516	0.00121692	0.0165752
HIPK3	29.5434	1.37262	0.234692	5.79292e-10	7.68842e-08
KRAS	22.0068	-0.278758	0.184238	0.0400838	0.193225
FBXO15	24.181	0.194976	0.266024	0.124927	0.375201
RPL36A	23.8023	0.343696	0.244161	0.0328173	0.170953
IDH2	27.2168	0.709436	0.216304	9.72105e-05	0.00235076
EHBP1L1	33.2761	0.199376	0.166208	0.112325	0.358039
RPLP2	26.0035	0.451244	0.22752	0.00738527	0.0614031
RAN	29.3318	0.0180587	0.138739	0.871112	0.951193
SEPTIN9	26.573	0.323141	0.184935	0.0220276	0.130406
CYB5R1	30.6597	0.37788	0.180541	0.00797137	0.0648043
ACO2	27.8985	-0.298645	0.1583	0.0165893	0.108448
H2AJ	28.7173	-0.178584	0.152134	0.129891	0.383491
EIF4H	26.2293	0.445939	0.192912	0.00369637	0.0370091
ATAD3A	24.8481	-0.190627	0.15739	0.112149	0.358039
DDRGK1	28.2046	-0.17764	0.145392	0.121915	0.37274
ANKRD36	22.6183	-0.252967	0.179739	0.0532864	0.228651
GTF2I	24.9638	-0.0163729	0.137937	0.88004	0.955008
FKBP10	19.3652	-0.210409	0.174979	0.0960571	0.327674
RPL35A	28.754	0.277194	0.196592	0.0482374	0.213901
YWHAG	29.7148	0.539922	0.189615	0.00063145	0.00993928
RAB1A	26.0016	0.0908991	0.140728	0.421654	0.700438
COL12A1	17.851	-1.47443	0.285322	1.125e-08	1.03555e-06
BCL2L2	22.7497	-0.483565	0.173351	0.000711672	0.0108888
UBB	29.6791	0.478505	0.188952	0.00180723	0.0222696
GSN	24.044	-0.300971	0.170682	0.0217137	0.129636
GNAI2	26.5914	-0.0870204	0.146989	0.448672	0.717851
ZNF574	19.7049	-0.261411	0.175664	0.0447506	0.206294
SMPX	30.4908	0.288842	0.182152	0.0347157	0.17658
EMC10	25.8351	0.782037	0.206722	1.80301e-05	0.000557539
MYBPC2	32.3268	-1.14122	0.152522	3.94751e-15	1.50189e-12
TRIP12	27.0445	0.0209104	0.138079	0.852528	0.941686
NEBL	33.7454	-0.236525	0.155541	0.0518898	0.224338
NRAP	33.1574	-0.092365	0.157381	0.421118	0.700082
RPL13A	24.388	0.253107	0.184033	0.0618417	0.252093
MAP1A	29.7381	0.197401	0.164951	0.118806	0.368484
RAPGEF1	30.5198	0.0568906	0.137452	0.605694	0.823526
ARHGDIA	25.4461	0.319505	0.179038	0.0217883	0.129659
CYP2A6	23.9515	-0.713238	0.208162	3.8516e-05	0.00108281
CD81	23.2986	0.0190826	0.145354	0.865945	0.948265
RPL12	22.7625	0.912817	0.333562	0.000367371	0.00657238
ZFAND3	25.8765	-0.000964957	0.140004	0.988895	0.995954
HSP90B1	22.5171	0.134717	0.160758	0.254652	0.542205
SKP1	27.9313	-0.464619	0.170635	0.000830893	0.012381
FNDC3B	24.4237	-0.0959939	0.145123	0.398496	0.682755
MDH1	26.1637	-0.0986353	0.150312	0.386841	0.673679
RPN1	27.0507	0.207206	0.167576	0.102483	0.34004
HNRNPD	23.6155	0.0640302	0.143452	0.571113	0.802003
NBPF14	21.2188	-0.216411	0.17181	0.0866498	0.308298
MAP2K7	26.7673	-0.259933	0.175589	0.0454007	0.207135
PRDX2	28.4663	-0.265686	0.16279	0.0331881	0.17183
HNRNPH1	21.8113	-0.045654	0.146222	0.683391	0.868429
SLC39A7	24.4939	-0.0590852	0.143675	0.596859	0.819013
TRIM51	22.5766	-0.163198	0.152234	0.163945	0.432564
VAMP8	24.871	-0.348301	0.170362	0.00919444	0.0712944
RPN2	27.8514	0.421941	0.192396	0.00534381	0.0484081
PDLIM4	27.6736	0.630036	0.231264	0.000632199	0.00993928
CALM3	25.0528	0.0285627	0.1401	0.798436	0.918968
CRIP2	26.985	0.0345492	0.143794	0.757349	0.902332
SFPQ	23.9955	-0.262764	0.18364	0.0483895	0.214196
OCIAD1	25.3512	0.418213	0.206686	0.00772158	0.0635888
C4orf54	24.649	0.995982	0.23851	2.72312e-06	0.000108677
CAV3	32.4069	0.13702	0.147339	0.235135	0.517801
PSMD2	27.0449	0.517676	0.201512	0.00150678	0.0193206
RPL36	23.2823	0.980431	0.248948	7.66133e-06	0.000264989
FCF1	21.39	-0.521148	0.185021	0.000534841	0.00877109
PRMT1	29.7689	-0.0238912	0.134973	0.821529	0.928961
YWHAE	26.7696	0.135291	0.150547	0.249789	0.53587
GPRC5B	26.6392	0.350905	0.191394	0.0157543	0.104532
NEXN	29.4808	0.0837211	0.148728	0.464747	0.729771
PNN	20.9152	-0.338885	0.180049	0.0134292	0.0942688
OAZ1	24.8707	0.219836	0.181751	0.0958785	0.327652
ATP1B1	22.3489	-0.998149	0.164883	8.98033e-11	1.55305e-08
TRIM28	24.9141	-0.073394	0.144694	0.510784	0.763743
ATRX	21.8415	-0.135731	0.153599	0.245282	0.53084
TPPP3	24.7223	0.00950207	0.152241	0.934364	0.975204
EIF2S3B	23.804	-0.228138	0.165127	0.0675397	0.266747
IGHG4	19.7114	-0.268045	0.18115	0.0429519	0.201916
GRB2	27.5231	0.22015	0.16679	0.0838244	0.301711
COX5A	26.0945	-0.679999	0.174415	7.49133e-06	0.000260689
USO1	24.9879	0.304716	0.182219	0.0286029	0.156207
SRGAP2B	22.9554	-0.0238186	0.161128	0.834605	0.933839
TGFB3	27.1407	-0.611975	0.184483	8.85012e-05	0.00216771
CARD9	24.1051	-0.0538214	0.140893	0.621285	0.830988
SEPTIN5	26.8077	0.344196	0.180701	0.0148731	0.100451
TLN1	24.9194	-0.042567	0.138447	0.696478	0.87419
NFAM1	20.4674	-0.268756	0.172184	0.037475	0.185169
SERF2	21.4453	0.493112	0.220086	0.00377547	0.0375376
DDOST	24.1292	0.348593	0.18968	0.0163952	0.107425
DNM2	24.3409	0.051139	0.144878	0.639253	0.842046
EIF4B	24.5541	-0.0793478	0.144384	0.478424	0.739452
PXDN	14.5861	-0.0265384	0.159672	0.814858	0.924532
DLGAP4	25.9799	-0.246252	0.157467	0.0443743	0.20489
MTCH1	25.8309	0.18393	0.161512	0.137629	0.396434
VASH2	21.9024	0.215149	0.178368	0.101639	0.33842
ADCY6	22.6737	-0.306224	0.172256	0.0204419	0.124772
PPP2CA	26.8848	-0.294856	0.158681	0.0184562	0.117424
CAP2	27.0741	0.0208356	0.137384	0.850542	0.941247
ZNF714	18.801	-0.119977	0.166167	0.313954	0.606546
GRINA	26.774	0.394809	0.193665	0.0088029	0.0694681
TGFBI	18.5764	-0.630178	0.296879	0.0021823	0.0250088
HTRA1	20.3983	-0.619968	0.278566	0.00233668	0.0263027
HLA-DQB1	20.8769	-0.057773	0.163172	0.616349	0.829026
EDF1	23.3311	0.463851	0.198028	0.00338729	0.034706
APOO	24.8221	-0.415045	0.166053	0.00205348	0.0241633
TRDN	29.1591	0.250566	0.174728	0.0572417	0.23941
PABPC4	22.4535	0.580458	0.212961	0.000892818	0.0129323
CHRNB1	22.8994	0.704799	0.215559	0.000124858	0.00287346
RPLP0	20.5535	0.236312	0.21291	0.0921166	0.320946
EMX1	20.8188	-0.165976	0.16415	0.168775	0.438216
TSPAN9	30.7048	0.896953	0.221116	3.63723e-06	0.000136371
WWTR1	21.8869	1.1859	0.255325	3.92557e-07	2.35824e-05
EIF1	22.3766	0.423249	0.201123	0.00680361	0.0585913
KLHL31	28.6859	-0.0599258	0.146474	0.592042	0.815934
RPS29	23.0195	0.127348	0.167824	0.295754	0.5909
AGL	29.7474	0.853128	0.283198	0.00012787	0.00289586
MYH4	14.5415	-1.89749	0.445807	1.65906e-06	7.33975e-05
PRRC2A	22.8167	0.189941	0.168152	0.130604	0.384007
PRRT2	21.5633	-0.161502	0.155114	0.170987	0.440353
SIGLEC16	18.7196	-0.162432	0.165937	0.182093	0.454594
SEMA6C	24.3375	0.265736	0.180299	0.0494034	0.216714
KRTAP10-10	22.8262	-0.458346	0.17657	0.0012793	0.01726
TPM4	21.8295	-0.0576253	0.143759	0.60575	0.823526
RGS18	19.2237	-0.16347	0.17077	0.186045	0.459635
MLLT11	28.6149	0.729496	0.23413	0.000182873	0.00376772
NEGR1	21.1599	-0.630763	0.176758	3.03162e-05	0.000888883
KDM4B	27.0346	0.103534	0.206412	0.360591	0.650204
LOXL1	25.7074	-0.258071	0.186735	0.0572098	0.23941
IGHMBP2	25.2337	-0.33732	0.179821	0.013029	0.0924835
MYH2	30.2134	-1.00588	0.305017	5.3691e-05	0.00141859
RNF113A	21.3578	-0.73029	0.189036	8.02858e-06	0.000276019
LAMC1	20.7314	0.111009	0.161781	0.354566	0.646695
ZFP36L1	20.0086	-0.472077	0.188105	0.00148704	0.0191138
RPS16	21.5145	0.293126	0.200485	0.04226	0.199921
PDZRN3	23.4157	-0.0745597	0.145689	0.507091	0.76117
HNRNPH3	21.4983	-0.0069916	0.141141	0.947754	0.979371
IGF2R	25.5183	0.534638	0.222065	0.00210136	0.0243763
MFAP4	24.6124	-0.51056	0.228378	0.00281646	0.030044
USP22	20.7733	0.459455	0.215991	0.00559073	0.0500884
ATP2B1	17.8598	0.620512	0.253356	0.00164741	0.0208004
SDCBP	25.8703	0.9697	0.226035	1.72683e-06	7.58079e-05
EWSR1	21.1131	0.00865375	0.144159	0.942699	0.977387
MYOZ2	27.9707	-0.205963	0.164531	0.0916866	0.320395
HNRNPK	22.065	0.114136	0.157182	0.335728	0.629227
RBM24	26.2262	0.0571946	0.147297	0.61208	0.827189
ITGA5	22.5688	0.242122	0.188446	0.0742295	0.282796
RPL23	24.0077	0.30903	0.190913	0.0297561	0.159603
SON	22.645	-0.147269	0.155917	0.211772	0.491295
RBP1	24.0089	0.471701	0.219337	0.00490788	0.0450245
SLC25A19	16.6969	-0.478875	0.2431	0.00497181	0.0454067
ZYX	24.9867	0.256382	0.179404	0.0557359	0.235605
IFI6	26.9238	0.253513	0.188313	0.062192	0.252822
LAPTM4A	21.6721	-0.379453	0.17772	0.00609902	0.0536319
ATP5PF	22.8162	-0.0792877	0.145804	0.480636	0.740632
CDK2AP1	22.2915	0.05318	0.146847	0.637044	0.841094
ENO1	21.6082	0.234992	0.182669	0.0803484	0.296093
UGP2	22.2941	-0.386628	0.203167	0.00994487	0.0756738
LCE2D	18.2269	0.340587	0.218224	0.0273998	0.151375
OVOL1	21.1506	-0.443445	0.189524	0.00271557	0.0294075
HNRNPUL1	24.2038	-0.0988813	0.148197	0.38286	0.669009
PPP3R1	27.3109	0.108136	0.142883	0.342939	0.635439
RTL1	29.358	2.19011	0.403162	3.87156e-09	3.94553e-07
HS6ST2	23.0628	0.216597	0.174019	0.0963275	0.328008
ATP1B4	27.5476	0.995768	0.231439	1.52937e-06	6.81882e-05
HSP90AA1	24.4577	0.553569	0.221139	0.0018145	0.0222696
CAPRIN1	23.2876	-0.00575178	0.139618	0.955056	0.982604
ILF3	16.833	0.546297	0.257028	0.00433899	0.041548
SLFNL1	20.7899	-0.571623	0.176663	0.000120898	0.00282774
JPH2	26.9177	0.191635	0.165376	0.123308	0.373592
HGF	21.8844	0.200437	0.192809	0.126823	0.37736
INTS6L	19.5583	-0.415719	0.204437	0.00590687	0.0522643
SULF1	14.5986	-0.606834	0.228289	0.00057712	0.00933038
CTHRC1	17.813	-0.562029	0.228415	0.00138153	0.0181025
H1-0	21.482	0.196451	0.174194	0.125045	0.375201
RPS6KB1	19.6365	-0.154138	0.160132	0.194769	0.470197
MAP2K1	25.1536	0.497551	0.205187	0.00228381	0.0258783
ACHE	22.8757	0.75075	0.237441	0.000147868	0.00323328
HMGN1	19.7856	0.110527	0.161423	0.352331	0.644317
NCOR2	23.1088	-0.0654493	0.145984	0.555192	0.791472
YBX3	24.708	0.144647	0.163677	0.23115	0.513899
ZNF625	16.8522	-0.168242	0.178596	0.175915	0.447983
COX6B1	23.1248	0.701716	0.22397	0.000191315	0.00388876
ZNF417	17.2757	-0.22224	0.195206	0.0949013	0.325264
ZNF540	18.6101	-0.342007	0.186799	0.0148571	0.100451
CFAP410	23.4504	-0.122963	0.148296	0.282698	0.576818
ATP1A2	21.2715	0.250301	0.194544	0.0738406	0.282256
ACTR3	23.5769	0.225622	0.171731	0.0833722	0.301185
MCL1	23.317	-0.654633	0.18386	3.03719e-05	0.000888883
CCT3	23.1194	0.390118	0.206871	0.0119114	0.0869287
NONO	22.0872	0.0189816	0.143898	0.866788	0.948382
ZNF207	20.7765	-0.0868819	0.151735	0.445954	0.715149
MAPRE1	21.4517	0.570117	0.245394	0.00233614	0.0263027
DIO1	25.5126	-0.435089	0.219651	0.00713453	0.0601429
SRPK3	26.4533	0.513599	0.208542	0.00188541	0.0229425
PKMYT1	22.5857	-0.043053	0.142105	0.696575	0.87419
EVL	19.3968	-0.141429	0.163204	0.236452	0.518414
PPP3CB	23.9721	-0.16824	0.155212	0.154113	0.418484
SYNCRIP	24.8004	-0.597419	0.169777	3.56087e-05	0.0010161
MSL1	22.2153	-0.246642	0.171086	0.0519276	0.224338
SH3GLB1	24.6611	-0.37067	0.170967	0.0062231	0.0545019
EIF3K	21.3764	0.362537	0.202346	0.0170144	0.110846
SEPTIN11	17.3907	0.509819	0.231817	0.00413164	0.0401601
DAPK3	27.1015	0.145526	0.169986	0.235167	0.517801
TNNI1	25.8703	0.291144	0.177524	0.0325917	0.170019
PTOV1	21.902	0.760059	0.237853	0.00013522	0.00300273
TM9SF3	23.9365	-0.174844	0.158962	0.144337	0.406178
COL4A2	16.8376	-0.103316	0.162816	0.375409	0.662608
SOX4	17.9788	-0.349407	0.195665	0.0142787	0.0981768
CLTC	22.5034	-0.191878	0.160551	0.11352	0.359609
ARL2	20.0158	-0.156652	0.172035	0.198997	0.476775
CDC42	22.3041	-0.201247	0.158955	0.0962585	0.327969
PSMC1	24.3272	-0.148508	0.150331	0.20164	0.479193
ACTN4	21.0102	-0.565598	0.184902	0.000250879	0.00478851
TMOD1	28.5796	0.48297	0.19342	0.00200909	0.0237881
SSR2	22.4128	-0.247512	0.167093	0.0491222	0.216312
FAM83E	20.2641	-0.25196	0.173002	0.0493513	0.216714
ANXA5	19.9487	0.135465	0.165056	0.265057	0.556542
MYH10	22.7793	0.00661098	0.148742	0.954898	0.982604
H3-3A	19.9534	0.306658	0.206782	0.0368007	0.183054
ANXA2	19.6338	0.106093	0.165464	0.37937	0.665887
MPZL1	16.3915	-0.136157	0.16886	0.260069	0.550116
RELL1	22.2278	0.72081	0.217833	0.000118644	0.00279605
TAF15	22.3403	-0.107743	0.152265	0.351708	0.644317
CD151	23.7089	0.137689	0.158588	0.252688	0.539674
ADAM19	23.5714	0.930918	0.23977	9.69485e-06	0.000330592
PSMB7	24.623	-0.181471	0.154572	0.124757	0.375201
TRIM54	22.417	0.00375921	0.142547	0.973879	0.989307
CCT6A	25.6806	0.00572132	0.137113	0.961994	0.984771
NFIC	20.4909	-0.504756	0.199662	0.00131982	0.0176398
CDKN2D	18.1348	-0.0420321	0.151954	0.709992	0.879133
COL4A1	18.628	-0.103457	0.164343	0.382102	0.668503
VDAC2	23.0459	0.467898	0.203224	0.0035802	0.0360584
SEC31A	21.5579	0.395393	0.208277	0.0114839	0.0846751
CDV3	22.6886	1.13026	0.24007	2.74885e-07	1.77499e-05
FKBP3	20.1491	0.500515	0.228556	0.00422155	0.0407654
HMGN2	21.3174	-0.187517	0.162556	0.122396	0.37274
XRCC5	20.7325	0.504891	0.215192	0.00301948	0.0318524
SSRP1	18.5417	-0.162593	0.171507	0.185204	0.458949
XRCC2	18.2505	-0.687658	0.193442	2.84438e-05	0.000841081
RPL14	21.8004	-0.112449	0.154411	0.330703	0.625147
SAP18	25.2636	-0.0572876	0.140655	0.60294	0.822043
UPK3BL1	20.7085	-0.873197	0.176928	5.49929e-08	4.42035e-06
ERBB2	22.4536	0.137913	0.169454	0.263367	0.554012
NOMO3	23.0139	0.646179	0.231643	0.000588777	0.00943862
ZNF500	17.2231	-0.518462	0.219948	0.00200369	0.0237881
DDX50	18.0336	-0.309143	0.193791	0.0263683	0.147418
UQCRC1	22.8901	0.097379	0.160833	0.406318	0.687273
LTBP4	19.2563	-0.829337	0.187835	6.30605e-07	3.36342e-05
XIRP2	25.3375	0.0736659	0.148085	0.51846	0.767908
EID1	21.7928	0.59925	0.224308	0.00094816	0.0135618
RNF187	22.3288	0.416641	0.213566	0.00934844	0.0723901
SLC38A2	19.7641	-0.182343	0.186921	0.150863	0.414129
PDXDC1	19.3945	-0.503499	0.192172	0.00106222	0.0149681
TNIP1	27.0209	0.641658	0.223047	0.000419791	0.00721611
PXN	22.0634	0.00837483	0.143012	0.943484	0.977387
NRBP1	21.0407	-0.0929756	0.153455	0.419396	0.698723
CBX5	19.3253	-0.148811	0.162554	0.212848	0.492189
RGS2	21.9348	1.39072	0.261804	1.23023e-08	1.11443e-06
CSPG4	26.0221	0.329746	0.194124	0.0218106	0.129659
NBPF19	14.9101	-0.0308372	0.158449	0.786061	0.915838
SNRNP70	19.3259	0.0581523	0.150583	0.613317	0.82766
RASSF4	22.5747	0.521315	0.208782	0.00189874	0.0230556
SEPTIN2	20.1948	-0.0380257	0.148027	0.734334	0.892655
AGO2	22.9819	0.0799907	0.147481	0.484198	0.744123
RPLP1	15.944	0.792877	0.368788	0.00205327	0.0241633
NPLOC4	23.9561	0.0960653	0.146146	0.403571	0.684916
CTSD	22.9613	0.0811104	0.158521	0.487659	0.745742
ACADVL	19.3866	0.0302597	0.147841	0.787626	0.916968
TLK2	19.0812	-0.0448582	0.154773	0.690169	0.872316
CCS	20.2261	-0.308739	0.180787	0.0215825	0.129246
PCOLCE	13.641	-0.599171	0.232063	0.000876618	0.012795
CAVIN4	24.4212	-0.17277	0.152861	0.141483	0.401512
HNRNPR	17.5809	0.218366	0.194913	0.108901	0.350591
ASPH	18.6223	0.0867868	0.15625	0.459231	0.726999
MMP2	12.7084	-0.981639	0.23152	1.29731e-06	5.92299e-05
SEMA6A	16.9519	0.440946	0.261043	0.0140704	0.0970979
SND1	20.1752	0.0992057	0.15822	0.405385	0.686712
SLC36A4	19.2717	-0.343183	0.193405	0.0151507	0.101714
MAP3K13	19.0429	-0.158706	0.168505	0.192985	0.468268
RPS15A	18.724	0.563347	0.277966	0.00437474	0.0416683
ANGPTL1	18.21	-0.350093	0.200095	0.0160138	0.105745
NUCB1	20.2182	0.107172	0.163274	0.367502	0.654599
PLEKHA4	17.0703	0.0694073	0.162674	0.557323	0.793573
NUDC	22.5703	0.0344138	0.144788	0.759188	0.902332
C4orf3	21.2056	0.399562	0.206225	0.010656	0.0800181
SACS	21.3121	0.732444	0.246493	0.000290471	0.00536478
USP9X	23.5644	-0.0804911	0.14447	0.471787	0.73525
QARS1	18.8764	0.278149	0.197114	0.0513429	0.222784
FUBP1	20.5006	-0.0529352	0.149997	0.619626	0.830742
UQCRHL	19.089	0.379949	0.234434	0.0202839	0.12434
FSCN1	16.697	0.247911	0.200515	0.0780013	0.29114
KCNH3	18.6997	-0.506971	0.216946	0.00215313	0.0247695
SMAD7	18.1561	-0.160413	0.172715	0.192564	0.468113
ITGA7	26.3101	0.473178	0.222576	0.00478763	0.0444276
EIF3E	19.3572	0.167082	0.18709	0.193379	0.468426
RAB2A	20.8126	-0.296885	0.175128	0.0246045	0.140418
POLR2A	19.7746	0.654512	0.241952	0.000782792	0.0117563
EIF3F	21.5177	-0.339404	0.187805	0.0159067	0.105191
SPON2	13.5646	-0.326833	0.287954	0.0407142	0.195093
PSMD3	26.9104	-0.83104	0.156589	6.4939e-09	6.28147e-07
RNF11	22.7334	-0.00972411	0.142711	0.929179	0.973883
ZNF768	16.8504	-0.0779272	0.157033	0.498784	0.754655
CCT7	17.3082	0.245822	0.203968	0.0806419	0.296093
BOC	13.2787	-1.047	0.217195	6.09881e-08	4.76793e-06
NUDT8	21.2555	-0.251807	0.203044	0.0672557	0.265993
MTRNR2L1	23.5362	0.203741	0.284443	0.107064	0.348155
TEAD4	22.8073	0.197939	0.17007	0.121484	0.372453
NEFM	22.4372	0.578536	0.234591	0.00177863	0.0220666
SRSF9	16.5879	-0.388709	0.201453	0.00838865	0.0676187
SF1	18.5833	0.00672499	0.147943	0.955541	0.98289
PPP2R3B	21.5723	0.719276	0.254452	0.000414751	0.00721611
UBE2H	21.4245	0.447222	0.240841	0.0095312	0.0734069
ADPRS	17.062	-0.336963	0.19716	0.0181824	0.1162
DDR1	22.5642	0.287291	0.191352	0.0409815	0.196209
CSTF3	16.915	-0.0603386	0.159743	0.599126	0.820546
NYAP1	15.1758	-0.098274	0.170207	0.404858	0.686227
HLA-DQB2	18.8895	-0.468554	0.193997	0.0020644	0.0242144
RAD21	20.4178	-0.07294	0.150258	0.509298	0.762923
CCNG2	17.2737	0.379413	0.221519	0.0182186	0.116302
MAP7D1	21.7263	0.46441	0.208118	0.00442398	0.0420094
MYLK4	17.0859	-0.36239	0.202414	0.0134155	0.0942688
ADPRHL1	23.946	0.403563	0.240992	0.0142284	0.0979508
NDUFS2	20.7925	-0.111084	0.154443	0.336192	0.629478
BRD4	17.7212	0.0135097	0.151082	0.906641	0.964637
CCDC51	21.9978	-0.378524	0.345486	0.0278789	0.15328
PDHA1	23.8693	-0.453431	0.17586	0.00130967	0.0175452
SUPT5H	20.3921	0.239899	0.186244	0.0770423	0.288694
RPS10	20.3035	0.74194	0.287279	0.000776287	0.0117329
RCC2	15.8174	-0.203288	0.18632	0.113834	0.360114
ECPAS	20.717	0.00565413	0.146416	0.96039	0.983783
MATR3	19.2133	0.0502934	0.14991	0.664729	0.856956
MYL2	15.9108	-1.81934	0.327888	6.90004e-10	8.56055e-08
RHOC	19.1457	0.0249437	0.147684	0.829006	0.931142
KLC1	21.1913	0.248146	0.187967	0.0689281	0.270173
NOTCH2NLA	15.1696	0.0822927	0.164342	0.48426	0.744123
RAB1B	18.5536	-0.00398754	0.14875	0.96981	0.988055
MAT2A	21.1002	-0.313318	0.196525	0.0260373	0.146543
CLEC3B	19.7176	-0.25171	0.246907	0.0834367	0.301185
BGN	9.93486	-0.949125	0.242164	4.49236e-06	0.000162265
PNISR	19.3477	-0.274354	0.180979	0.0379425	0.186182
RPS21	18.3197	0.266541	0.200204	0.0611781	0.250397
CCN2	18.652	-0.167499	0.182065	0.187231	0.461423
SEC61A1	16.3859	0.318026	0.219351	0.0379998	0.186182
REPIN1	18.1229	0.121079	0.166676	0.317213	0.610688
ANTXR1	19.1281	-0.350162	0.194884	0.0138079	0.0966257
H3C13	17.9355	-0.0571983	0.169082	0.616176	0.829026
PSMD1	20.0798	-0.187553	0.169742	0.130464	0.384007
ADAMTS9	16.5743	-0.323765	0.204951	0.0247308	0.140857
DST	19.4189	0.109252	0.158417	0.360323	0.650204
SEC62	19.3365	-0.0721176	0.15227	0.525773	0.771823
CUX1	19.6303	-0.04027	0.147553	0.720226	0.885466
TIMP2	13.4999	-0.095553	0.170681	0.412218	0.691855
SLC25A5	21.084	-0.121896	0.153622	0.292814	0.587791
MYOM2	22.7949	0.58592	0.245006	0.00180107	0.0222574
MRPS16	19.2528	0.0545435	0.151439	0.630584	0.835945
DCTN2	19.958	0.00590599	0.148708	0.959469	0.983783
KCNAB3	14.3773	-0.133485	0.173066	0.269998	0.563979
CYP2W1	22.3238	-0.0164717	0.148561	0.882982	0.956382
EPB41L3	23.1058	0.700917	0.22072	0.000176834	0.00368318
HLA-DRB1	16.4831	-0.207637	0.183337	0.106005	0.346592
GANAB	17.1327	0.127138	0.168232	0.299716	0.594742
TRIR	17.7875	0.369633	0.227849	0.0215305	0.129206
DAG1	20.7883	0.0400273	0.149093	0.725646	0.887642
NFKB2	22.4059	0.03924	0.189788	0.717805	0.884718
H3-3B	16.3535	-0.123689	0.166707	0.29878	0.594249
IGFBP7	19.4725	-0.484999	0.199771	0.0020663	0.0242144
BRD3	18.9999	0.13074	0.165642	0.282673	0.576818
UBA1	19.6791	0.0725705	0.16073	0.533	0.776175
ATP5PD	19.3626	0.558593	0.235799	0.00230259	0.0260216
HSPB3	23.8973	0.491916	0.216694	0.0034001	0.0347749
XRCC6	20.7022	0.149505	0.161466	0.222889	0.503773
GIT2	18.4602	-0.170369	0.16993	0.164221	0.43258
TMEM170A	20.5719	-0.552972	0.204212	0.000670973	0.0104911
NNAT	18.9227	0.352488	0.234542	0.0284877	0.155727
GCNT2	38.3006	-1.92879	0.215204	1.13033e-20	8.06346e-18
KLHL40	23.1676	0.701161	0.236435	0.000285396	0.00530539
SERINC1	20.7209	0.129019	0.158335	0.285747	0.579884
PGRMC2	20.7541	0.140288	0.171648	0.253249	0.540297
PRDX6	21.6525	0.535625	0.232985	0.00274008	0.0296167
ANTXR2	19.8985	0.238396	0.191365	0.0810169	0.296736
C1S	21.0437	-0.532009	0.210403	0.00118254	0.0163408
EMP3	19.2095	0.0399673	0.148714	0.729695	0.890195
HMX1	19.0843	-0.159597	0.168458	0.188016	0.462504
PARK7	17.7337	0.518792	0.233326	0.00380079	0.0377236
ARL6IP4	18.1665	-0.0384529	0.153668	0.731641	0.891243
CDK16	19.0115	-0.117884	0.163112	0.319086	0.612521
PRDX1	19.4011	0.199094	0.190956	0.134275	0.392575
PCM1	19.7042	-0.162873	0.163883	0.179141	0.451572
KCNE5	22.124	0.652191	0.256998	0.00104927	0.014859
COL5A3	22.4302	0.329267	0.230777	0.033944	0.174051
EIF3L	18.1014	0.435439	0.222777	0.00895372	0.0702873
ITFG1	20.5692	-0.14164	0.158018	0.229505	0.511759
LRP1	12.4068	-0.227024	0.218818	0.0934386	0.323184
SAAL1	16.583	-0.440068	0.205988	0.00449629	0.0423868
NCBP2	17.3598	-0.0793507	0.161203	0.488499	0.746615
MORF4L2	22.5357	0.0447476	0.155409	0.693425	0.87263
KIF5B	22.1714	0.62514	0.224801	0.000651954	0.0102217
BSG	17.4925	0.155444	0.174497	0.218446	0.498982
C16orf78	18.5085	-0.372702	0.201577	0.0109462	0.0815534
CD99	19.9269	0.503258	0.240948	0.00483979	0.0446594
TFG	19.3257	0.192891	0.181528	0.138048	0.396898
CHRNG	19.0125	-0.0454747	0.155837	0.690583	0.872316
ZNF346	14.679	-0.150404	0.175985	0.222377	0.503414
PBX2	18.9342	-0.29844	0.191935	0.030519	0.162474
CHTOP	20.9628	-0.0644767	0.149858	0.566735	0.799594
MPRIP	21.0662	0.210086	0.178547	0.109439	0.351672
ATP5MF	19.7606	0.139188	0.168897	0.257236	0.545602
ZNF707	17.955	-0.327573	0.200433	0.0217474	0.129659
MTCH2	19.3474	-0.0228573	0.148788	0.837692	0.93501
YME1L1	18.2469	0.0490144	0.158213	0.670214	0.861106
AFF4	19.4886	0.266119	0.199917	0.0612103	0.250397
ATP2B4	17.6594	-0.389999	0.197906	0.00784397	0.064226
ANKRD17	19.3551	0.0877277	0.160962	0.455415	0.724663
TBCA	21.0041	0.389935	0.236743	0.0169658	0.110656
ATXN2L	19.3357	-0.043846	0.156984	0.697526	0.87419
DNAJA4	24.1085	0.730746	0.239504	0.000205631	0.00411582
ARHGAP23	19.1894	0.471994	0.236054	0.00685681	0.0587398
TRIM72	23.1193	0.133728	0.166422	0.270626	0.564084
PPP1R12B	21.1632	0.119343	0.156984	0.3138	0.606454
WDR44	19.546	0.837125	0.239191	5.02127e-05	0.00133908
SYPL2	28.5678	-0.743319	0.22637	5.4356e-05	0.00142954
TTC3	15.5139	-0.00744284	0.155837	0.946821	0.978896
SPTB	21.5009	0.662388	0.274718	0.00134103	0.0178398
TSPAN3	19.5362	0.184017	0.181328	0.155534	0.419684
PRRC1	20.2762	-0.143349	0.160137	0.225365	0.506761
CAPZB	19.798	-0.0379728	0.147811	0.734831	0.892655
THRAP3	18.681	0.0077569	0.148223	0.945824	0.97822
SENP3	17.307	-0.263324	0.189115	0.0488075	0.215425
MAPK1	18.7039	-0.113936	0.159746	0.331392	0.625782
RUSC2	18.6298	0.214918	0.199441	0.117457	0.365499
PFDN5	22.1253	-1.03406	0.200787	1.70513e-08	1.5205e-06
TSC22D1	18.4245	-0.701529	0.199612	3.26105e-05	0.000944711
TACC2	19.5422	-0.0230742	0.149761	0.836297	0.934718
TUFM	19.2346	0.687383	0.23603	0.000417128	0.00721611
CARD11	19.0648	-0.371347	0.194523	0.00967853	0.0742795
CLIC4	18.1169	0.491839	0.245152	0.00639307	0.0555331
TSPAN13	22.5843	0.574736	0.223055	0.00120921	0.016549
CRABP2	19.4449	-0.0728471	0.154267	0.52464	0.770885
PIK3R1	18.6975	-0.0837053	0.155522	0.465952	0.730345
FAM20C	15.8545	-0.0411384	0.159277	0.716942	0.884094
NUTF2	19.1089	1.29801	0.275621	2.79917e-07	1.77499e-05
DYSF	23.4736	0.161274	0.183989	0.201786	0.479227
RPL10L	15.6002	0.183945	0.188697	0.158952	0.425088
MED13	19.3413	-0.0552831	0.151669	0.625156	0.832911
MGP	14.1478	-1.22234	0.199661	3.58084e-11	6.59221e-09
TUBB2B	18.9551	0.796138	0.266166	0.000280067	0.00525771
DAOA	15.9513	-0.345271	0.207394	0.0190365	0.120046
SGCD	18.5452	0.214858	0.187484	0.108938	0.350591
ARPC2	18.7301	-0.106985	0.156012	0.357555	0.648709
ANAPC5	17.6672	-0.181032	0.175459	0.145382	0.406712
MYO1C	20.8845	-0.0961001	0.15237	0.396844	0.681842
IPO5	18.27	0.242137	0.193884	0.081094	0.296736
FKBP1A	18.7201	0.388669	0.224375	0.016468	0.107778
TOMM7	19.3147	0.183816	0.181153	0.154986	0.419401
CCT5	19.1525	0.102877	0.161659	0.388112	0.675292
ZNF669	14.9291	-0.106297	0.168404	0.366225	0.653344
GGA2	19.0958	0.47263	0.221651	0.00549735	0.049563
KLHDC3	20.17	0.0661621	0.154907	0.567217	0.799755
ERMARD	10.0064	-1.64674	0.243145	4.19825e-13	1.14092e-10
CCT8	21.0572	0.168074	0.171661	0.180627	0.452918
CNN2	15.7563	0.172492	0.194255	0.184829	0.458949
APLP2	19.7829	1.10526	0.251486	1.25982e-06	5.83371e-05
NDUFS3	18.7161	-0.0760912	0.156768	0.505706	0.760291
SFRP2	12.2836	-1.32445	0.235513	6.46702e-10	8.20162e-08
DDX39B	15.0957	-0.00143449	0.1609	0.988319	0.995954
PUF60	16.239	0.0598981	0.156598	0.600885	0.821044
ZHX3	14.7293	-0.237356	0.200017	0.0759156	0.286507
ARHGEF2	16.5663	-0.0926474	0.165008	0.426741	0.702409
BICD1	16.7571	0.015294	0.154146	0.895354	0.961681
RPS26	19.1514	0.307298	0.213713	0.0389225	0.189047
TGFB2	13.5147	-0.738202	0.23916	0.000128417	0.00289673
UBE2V2	20.1485	-0.359118	0.181887	0.00947437	0.0732659
ATP1B3	18.408	0.784668	0.247286	0.000165578	0.00349983
NUMA1	14.3918	0.0233722	0.161047	0.839241	0.93619
MAP3K7	15.0012	0.0161426	0.157749	0.889071	0.959335
SRSF3	17.5109	0.136332	0.175263	0.269513	0.563204
SBDS	18.7208	0.53724	0.230321	0.00277152	0.0297313
GPR87	18.7347	-0.59567	0.193564	0.00019429	0.00391807
GNB2	18.3698	0.124898	0.168513	0.304345	0.598266
FBLN1	11.8392	-0.83651	0.230062	1.73508e-05	0.000541099
UQCR11	18.2368	-0.0715808	0.156302	0.530766	0.775495
ZC3H11A	16.754	-0.0736096	0.156025	0.520683	0.768536
TUBA4A	18.2413	-0.466967	0.205352	0.00267079	0.0289776
FNBP1L	16.4598	0.328978	0.215791	0.0321324	0.168547
PTN	20.5742	-0.322212	0.180496	0.01799	0.115488
LAMB2	21.2317	-0.0926859	0.169089	0.422875	0.701208
NPEPPS	18.8225	0.132894	0.16639	0.277428	0.571603
FGFRL1	20.508	0.297377	0.215105	0.0455693	0.207135
AP3D1	17.3747	0.172815	0.178717	0.175198	0.447494
UBR4	17.6903	0.115858	0.165355	0.337872	0.631059
PRRX1	14.7703	-1.13553	0.210832	3.11783e-09	3.35726e-07
PCID2	15.6499	-0.153211	0.179877	0.219598	0.499879
RPS7	17.2634	0.134225	0.173694	0.279374	0.57352
AP2M1	20.7573	0.0111517	0.150073	0.922704	0.970667
DPYSL3	15.5197	-0.550021	0.202462	0.000629329	0.00993928
TAGLN2	14.5298	-0.268009	0.202855	0.0536549	0.229312
IDH3B	18.8622	-0.150327	0.165121	0.209172	0.487881
SH3BGR	23.9213	1.08999	0.26114	2.22112e-06	9.18548e-05
RARA	18.9857	-0.34125	0.190897	0.0146837	0.0994071
SGCB	18.8767	0.000783773	0.152007	0.997309	0.998922
NPIPB3	15.2334	0.0369274	0.162187	0.748513	0.899137
LGMN	18.2518	-0.054532	0.153857	0.630433	0.835945
KPNA3	19.1985	-0.142784	0.169854	0.234773	0.517801
SEMA3C	16.5456	-0.0980511	0.170047	0.4033	0.684916
GPI	19.6354	-0.0815487	0.158303	0.476646	0.738387
MAPKAPK2	18.5738	0.0773368	0.155686	0.503147	0.758241
FITM1	17.2206	-0.0670041	0.161099	0.556684	0.792861
ZFHX4	14.0354	-0.157628	0.182793	0.202062	0.479487
ITGAV	19.1023	0.061336	0.154557	0.601233	0.821044
CD276	16.2629	0.366425	0.227319	0.0229767	0.13449
SPATS2L	18.5853	-0.00620847	0.154702	0.953802	0.982311
ADNP	17.0701	-0.0276868	0.153594	0.804414	0.920802
RPL39	20.6498	0.360244	0.244122	0.026423	0.14755
RALY	18.9143	0.33006	0.224038	0.0328307	0.170953
GALNT2	17.0428	0.533292	0.249732	0.00434656	0.0415508
RAB7A	19.9236	-0.044003	0.146798	0.693219	0.872563
CCT2	19.3791	0.409467	0.218209	0.011536	0.0848867
MCAM	18.7715	0.661375	0.247763	0.000896582	0.0129421
SEMA6B	15.1203	0.333892	0.248475	0.0383046	0.186841
NCOA1	17.4773	-0.00717754	0.152226	0.948256	0.979371
POLR2L	17.7556	0.798263	0.278546	0.000328437	0.00600767
COPA	16.2291	0.0241285	0.154532	0.834196	0.933665
RBM39	16.8021	-0.26958	0.191446	0.045353	0.207135
ZNF684	16.3145	-0.269052	0.193605	0.0466352	0.209235
CXXC5	18.8917	-0.0812735	0.153999	0.477765	0.738938
FURIN	18.7013	0.137627	0.172033	0.268665	0.561843
COL11A1	14.1797	-1.39666	0.284157	5.08716e-08	4.14749e-06
TCF4	17.7869	-0.361902	0.206762	0.0146472	0.0994071
PSMA7	18.4663	0.0960692	0.159511	0.416838	0.697009
G3BP1	17.8492	0.104713	0.166307	0.383188	0.669376
LHFPL6	15.854	-0.0298023	0.154744	0.792518	0.917611
ILRUN	21.8914	-0.422569	0.187587	0.00337032	0.0345943
CDH11	12.0552	-0.631332	0.250435	0.000890331	0.0129291
RALA	18.2684	-0.0546355	0.150416	0.627961	0.834994
NECTIN2	18.8386	0.881816	0.247036	3.84554e-05	0.00108281
CNBP	19.2435	-0.21535	0.179376	0.0933661	0.323184
EPN1	19.1759	-0.0796814	0.156101	0.487271	0.745742
SOD1	19.9241	0.0970587	0.15745	0.409836	0.690198
CASP2	13.4136	-0.00904028	0.16116	0.935604	0.975581
JAM2	16.9374	1.15724	0.284817	5.03379e-06	0.000179549
WAC	17.6295	0.0239118	0.151254	0.83266	0.93326
NCS1	17.7203	0.758385	0.246861	0.000235362	0.00455325
SRSF2	14.8848	0.403841	0.24926	0.0183149	0.116655
ZNF208	15.4096	-0.0516413	0.162464	0.650924	0.849631
TCAF1	17.4011	0.653716	0.25249	0.00110176	0.0153735
PSMB5	19.0715	0.209533	0.183182	0.112967	0.358766
TACC1	19.8235	0.362881	0.228053	0.0231761	0.13491
COX4I1	18.1553	0.438476	0.225335	0.00910111	0.0710534
WASHC1	16.0594	-0.179692	0.190177	0.154929	0.419401
ATP5MG	18.1925	0.118545	0.167756	0.326666	0.620401
POU5F1	13.8216	-0.308525	0.217644	0.03346	0.172588
FERMT2	18.7434	-0.199578	0.178319	0.114005	0.360114
TOMM20	18.8978	0.298039	0.207229	0.0424212	0.200081
GSTP1	15.7621	0.0116246	0.155785	0.921914	0.970534
TXNDC5	13.6482	0.074633	0.167343	0.527058	0.773245
NCAM1	17.3636	0.205525	0.188861	0.125579	0.375815
PNPLA2	18.6481	-0.0320412	0.153329	0.746557	0.898669
CSNK2B	18.837	-0.125585	0.160215	0.285928	0.579884
KIR3DL1	14.1559	-0.075006	0.165814	0.516283	0.76665
FAU	17.3571	0.163498	0.177985	0.199852	0.477089
PDIA6	18.1078	0.394474	0.229515	0.016117	0.105898
RPS25	17.763	0.205279	0.201737	0.126259	0.376857
NDUFA4	16.3463	0.699219	0.255721	0.000703152	0.0108456
COX6A2	14.8255	0.146691	0.187697	0.245034	0.530505
COL24A1	21.9102	-0.117849	0.169522	0.325616	0.619064
ATP5IF1	17.5142	0.0248571	0.15599	0.82828	0.930878
ARHGEF40	13.7738	-0.0919929	0.1699	0.430224	0.704732
MICALL1	18.076	0.259069	0.198666	0.0674053	0.2664
AKAP13	18.8718	0.0577662	0.158615	0.617692	0.829291
MBD3	19.205	0.00619642	0.147516	0.958381	0.983545
MYMK	20.1651	0.320207	0.205371	0.0312186	0.165273
ANKRD1	26.3153	-0.670945	0.393214	0.00539255	0.0487722
HSPB2	19.9773	0.21673	0.196411	0.108114	0.350155
LMOD3	18.009	0.107994	0.164586	0.366708	0.653593
HEATR5A	16.4745	-0.0169988	0.153353	0.878737	0.955008
SLC7A5	19.6874	0.832337	0.24439	6.84125e-05	0.00174446
CSRNP2	18.3168	0.0868187	0.155016	0.459654	0.727015
CHMP6	16.5487	-0.272076	0.193992	0.0457537	0.207135
ELN	13.3561	-1.55758	0.35517	4.62373e-07	2.66542e-05
PLXNB2	14.712	0.244886	0.207313	0.0842273	0.302128
DLD	20.2306	-0.0961543	0.156981	0.404023	0.685219
PLOD1	14.969	0.0362927	0.159581	0.751209	0.900361
LMOD2	20.3759	-0.595159	0.225924	0.000613573	0.00974406
OAZ2	19.134	0.115592	0.16284	0.333833	0.627324
TLE3	16.6559	0.0053197	0.152905	0.964016	0.985312
MAMDC2	18.4713	1.26323	0.297276	2.04751e-06	8.65567e-05
TM7SF3	17.7005	-0.283563	0.193856	0.0375735	0.185411
WIPF3	18.3039	0.829839	0.263915	0.000158744	0.00340584
PTP4A1	17.4543	-0.315645	0.190619	0.0231433	0.13491
H4C5	12.642	0.0176451	0.165175	0.878504	0.955008
PARVA	14.2345	0.235658	0.20637	0.0951597	0.325781
ZNF350	15.2755	-0.472699	0.217519	0.00325174	0.0335582
U2AF2	16.5036	0.0426263	0.158879	0.704955	0.876669
NDUFV2	16.1079	-0.489361	0.20369	0.00176314	0.0219221
RAB11B	14.3295	0.00817117	0.158606	0.944202	0.977606
CD9	17.0625	-0.640435	0.201205	0.000127221	0.00289263
CALM1	17.8974	-0.036765	0.154396	0.750591	0.900299
ARID1A	16.5119	-0.29536	0.195906	0.0324533	0.169452
EXOSC6	14.6142	0.185056	0.197679	0.162679	0.430815
STARD7	17.0074	0.328178	0.21585	0.0318883	0.167575
ABLIM3	17.8893	0.397249	0.225561	0.015185	0.101714
KTN1	19.7559	0.340661	0.211512	0.0253751	0.143382
PHLDB1	17.5549	-0.359719	0.192875	0.0117333	0.0859317
GHITM	19.069	0.2463	0.210782	0.0816794	0.297523
MTDH	18.0879	-0.0154897	0.151806	0.874478	0.952777
FEM1B	19.672	0.265147	0.203066	0.0614866	0.250902
XIRP1	21.0409	0.355899	0.208251	0.0196593	0.122336
RBM8A	16.3782	0.632675	0.254983	0.00151565	0.0193206
WLS	16.335	-0.0932835	0.162858	0.423233	0.701471
SPG7	15.1352	-0.218375	0.191731	0.0945151	0.324547
SMIM40	14.4963	-0.195844	0.190974	0.130048	0.383755
MEF2D	19.8912	-0.349435	0.184506	0.0117446	0.0859317
PPIAL4F	17.2992	-0.165277	0.180393	0.18275	0.455637
MLLT6	17.6377	-0.0903396	0.161453	0.43581	0.708377
GLIPR2	14.3189	0.846889	0.294243	0.000380554	0.00674479
BAG3	18.4349	-0.124619	0.15973	0.289032	0.582864
TMEM182	19.3579	0.458965	0.243943	0.00876145	0.0693504
EBF1	15.7016	-0.481217	0.210193	0.00251324	0.0276761
RGMB	17.1633	-0.0441697	0.160372	0.689999	0.872316
SNRNP200	17.9877	-0.0279983	0.152408	0.803529	0.920802
SEC63	15.7886	0.0875899	0.164504	0.459913	0.727069
UPK3BL2	15.9548	-0.0313807	0.15723	0.781838	0.914359
LUM	16.1168	0.0511082	0.161747	0.659363	0.85444
BANF1	17.513	-0.0499923	0.160731	0.662386	0.856158
SF3B1	15.3975	-0.341261	0.209394	0.0198229	0.1227
SESN3	15.4437	0.0802363	0.167326	0.497025	0.753793
CORO1C	16	-0.000601098	0.156504	0.993347	0.997932
DNMT3A	16.3484	-0.171143	0.1767	0.169224	0.438386
GORASP2	17.1307	-0.0148357	0.153308	0.894201	0.96138
PDAP1	19.4408	0.52731	0.230461	0.00303405	0.0318883
U2AF1	16.0798	-0.0251463	0.160881	0.822452	0.929379
MYO18A	18.6849	0.672496	0.240038	0.000584329	0.0093937
ARPP21	15.9743	0.687757	0.285798	0.0016752	0.0211046
FNDC3A	16.8425	0.158672	0.179284	0.211277	0.491143
EIF3B	15.3358	0.666454	0.254497	0.00107849	0.0151173
TCEAL9	17.3761	-0.180625	0.179755	0.149494	0.41223
BACH1	15.5274	0.388846	0.241562	0.0201954	0.12393
PAM	17.0476	0.0439989	0.157166	0.703103	0.876116
RRAD	21.4788	0.811104	0.274529	0.000241617	0.00465847
CTSA	17.5111	-0.130534	0.169074	0.275165	0.569179
CALM2	17.7643	-0.608569	0.191278	0.000125874	0.00287346
UBE2L3	16.2353	-0.12195	0.163791	0.304069	0.598266
PABPN1	16.5402	0.0643834	0.167504	0.581583	0.807986
EIF4G3	16.5345	-0.219076	0.184677	0.0914467	0.320176
NPC2	16.5897	-0.406594	0.207637	0.00762447	0.0630621
ZBTB7B	14.4412	-0.387274	0.220934	0.0121743	0.088621
PSMC3	17.2052	0.752946	0.252594	0.000318156	0.00583832
ACAA1	16.2685	-0.0354006	0.157529	0.753294	0.900621
PRKDC	15.8086	-0.0453647	0.156287	0.691012	0.872316
SRP68	17.9248	0.00715834	0.15489	0.951439	0.980651
FLNA	11.9546	-0.414276	0.241584	0.0111656	0.0828272
TCEAL8	17.6811	0.0634948	0.160234	0.559347	0.795067
LRP6	18.349	-0.509721	0.189431	0.000779394	0.0117362
PBX1	14.4772	-0.147387	0.177832	0.229561	0.511759
AHDC1	16.6832	0.0641824	0.167658	0.582465	0.807986
ITGA4	15.7792	0.0587512	0.158198	0.616126	0.829026
EIF4EBP2	18.8853	0.85872	0.259595	8.439e-05	0.00210946
OR56A4	15.8792	0.14202	0.178514	0.255429	0.542918
SOX11	15.4214	0.863677	0.285104	0.000233217	0.00454256
GNL3L	16.4975	0.313411	0.24035	0.0445623	0.205592
ATP2A3	18.8484	-0.121732	0.172623	0.310052	0.603071
DIO3	15.4669	-0.0857654	0.162682	0.4613	0.727681
RHOQ	15.7657	0.00541891	0.157139	0.940548	0.977029
KIAA1614	16.28	-0.228734	0.191138	0.0822087	0.299022
NPFF	14.5534	-0.0924971	0.171037	0.42623	0.702409
KANK3	14.2905	-0.162051	0.180209	0.190386	0.466323
MXD4	16.3297	-0.0980943	0.163015	0.40117	0.684039
CCDC80	13.8284	-0.917092	0.204908	4.95631e-07	2.82857e-05
PRMT2	15.9959	-0.0860277	0.161365	0.457013	0.7255
CASP12	15.0336	-0.195754	0.186727	0.124527	0.375201
SDC2	17.7448	0.285225	0.212852	0.0523821	0.225789
ATXN7L3	15.6734	0.180857	0.18604	0.164608	0.432984
BRD2	13.8972	0.0503398	0.16268	0.664704	0.856956
BMPR2	15.6915	0.00367938	0.157777	0.975575	0.989973
ACIN1	15.6667	-0.179003	0.178748	0.15323	0.417614
NID1	16.0763	0.0478738	0.160002	0.67853	0.867078
FARP1	16.0458	0.179815	0.187142	0.169027	0.438272
DNAJB2	16.9237	0.134294	0.173784	0.275752	0.569982
PPP5C	16.1939	-0.32765	0.205158	0.022439	0.131977
ASB5	18.8055	0.101444	0.16529	0.396985	0.681842
MYO18B	19.6259	0.0228932	0.159354	0.842005	0.938357
SDHA	16.9651	-0.23604	0.188635	0.0729526	0.279799
LRRC27	13.8494	-0.00856081	0.161166	0.938338	0.976819
EIF3M	16.5386	0.155898	0.180077	0.217655	0.498187
BCLAF1	14.8852	0.0870215	0.168253	0.464898	0.729771
DNAJA1	18.3145	-0.0302376	0.148995	0.786312	0.915838
EMC1	15.9457	0.0752631	0.16217	0.521469	0.768804
MRC2	13.6804	-0.0991661	0.17575	0.364878	0.652573
KDELR1	15.7731	0.176531	0.183089	0.174464	0.446583
CBWD2	13.7078	0.254976	0.223873	0.0804121	0.296093
SULF2	10.309	-0.948182	0.238457	3.67988e-06	0.000136371
PDE4D	13.8879	-0.0596951	0.162553	0.60289	0.822043
RAB18	17.1427	-0.219777	0.189046	0.0925383	0.32163
DGCR6L	14.9654	0.400134	0.268288	0.021427	0.128992
ARL6IP5	19.9302	0.00106174	0.149419	0.99376	0.997932
NDUFV1	16.3023	-0.0133389	0.152907	0.903589	0.963296
HSPA4	17.4912	0.448225	0.233742	0.00905195	0.0709608
KIAA1549	16.6921	0.0905816	0.160789	0.443893	0.714544
CTDSP2	14.1953	-0.555553	0.234844	0.00144515	0.0187018
EGLN3	18.2095	0.818487	0.249675	0.000119054	0.00279605
HECTD1	18.1791	-0.314923	0.19557	0.0242578	0.138995
LAMA4	10.1985	-0.847183	0.273846	9.94859e-05	0.00239564
BBLN	15.5529	0.233124	0.212209	0.0969874	0.328686
WDR5	14.0279	0.172835	0.190982	0.187308	0.461423
SLC39A3	15.0718	-0.242717	0.199936	0.0706701	0.274277
RBBP4	18.0628	0.0742988	0.156486	0.527583	0.773302
NPAP1L	13.8048	-0.317114	0.2138	0.0294467	0.15854
PSMB2	16.7946	0.0452895	0.154819	0.690256	0.872316
DYRK2	16.4506	-0.150778	0.170996	0.21557	0.495672
GLG1	15.0089	0.110328	0.174215	0.364628	0.652331
ACTN1	17.1661	-0.229745	0.186832	0.078338	0.291964
ATP6V1G1	15.9027	0.229975	0.202143	0.0980964	0.330872
HP1BP3	14.0566	-0.23419	0.201809	0.0811642	0.296736
IL17B	19.8108	2.26809	0.349708	1.53202e-11	3.0149e-09
AZIN1	20.6976	-0.171113	0.181747	0.169825	0.439145
FXR1	20.3779	-0.181731	0.165022	0.136572	0.395241
GDI2	15.2586	0.0675425	0.162751	0.564003	0.799085
PKD1	14.5895	-0.370016	0.222814	0.0151447	0.101714
LDHAL6A	17.533	-0.17158	0.179316	0.164636	0.432984
TIAL1	14.8073	-0.367211	0.215105	0.0144838	0.0987562
KHDRBS1	14.0657	0.278089	0.223851	0.062947	0.255313
STK19	16.7641	-0.343359	0.200217	0.0171629	0.111298
ERGIC1	18.5382	-0.358138	0.193032	0.0122597	0.0889024
RNH1	15.9715	0.326908	0.227849	0.0363401	0.181637
LPAR2	11.5325	-0.128365	0.18736	0.290032	0.584246
CSNK1A1	15.4748	0.0184012	0.161295	0.872991	0.95243
ITGA6	19.2552	0.917902	0.258528	3.69765e-05	0.00104987
WNT9A	14.0249	-0.146146	0.177521	0.233174	0.516817
EXOC7	15.3068	-0.0845271	0.163499	0.466422	0.730626
HSPB7	18.4042	0.15421	0.180758	0.216797	0.497492
TP53BP2	16.6927	0.0464687	0.156408	0.684118	0.868965
AMOTL1	16.2954	-0.0800051	0.161124	0.487796	0.745742
S100A4	15.6656	-0.318643	0.210335	0.0284523	0.155683
NRDC	18.1937	0.0361332	0.153927	0.752901	0.900621
PACSIN3	20.6634	0.134302	0.163994	0.267783	0.560411
SETD5	15.0092	-0.435029	0.229439	0.00690842	0.0589333
UNC13D	16.8138	-0.0934356	0.163014	0.425133	0.702409
MXRA8	12.9255	-0.423596	0.236809	0.00871693	0.0692863
MIDN	15.6112	-0.00245901	0.15864	0.981394	0.99291
MYL12B	15.526	-0.0496515	0.162152	0.661792	0.855846
SEPTIN8	15.4554	-0.0749626	0.161334	0.515297	0.766233
GOLGA3	13.5021	0.447762	0.26454	0.0138564	0.0967036
IK	16.6719	-0.146477	0.170366	0.22671	0.508383
CCNL2	14.0601	-0.131841	0.177867	0.275267	0.569184
AKT1	16.0445	0.61778	0.25484	0.00181163	0.0222696
ZFP37	16.18	-0.573677	0.210312	0.000579514	0.00934261
ANKRD11	14.3294	0.181901	0.193811	0.167764	0.437501
STRBP	13.7393	-0.115613	0.174614	0.333561	0.627227
SLC3A2	13.6354	0.5037	0.276718	0.00918742	0.0712944
STAT3	14.5478	-0.122282	0.173998	0.307458	0.600948
IGDCC4	16.6405	0.0990851	0.164173	0.407572	0.688169
EIF5	17.145	0.128507	0.172293	0.294347	0.589003
ADGRL2	15.2346	-0.190838	0.183911	0.132136	0.387116
IMPDH2	17.1569	0.00491577	0.153214	0.96682	0.986691
FHOD3	17.9151	0.259968	0.196099	0.0652212	0.260839
COX17	16.2363	0.211532	0.197437	0.119439	0.369689
APOBEC2	17.2968	0.12502	0.16996	0.306628	0.600524
SCRN1	16.5319	0.384073	0.248059	0.0217157	0.129636
SDF4	14.6619	0.125814	0.173217	0.310225	0.603071
PPIB	10.2897	-0.0522958	0.175202	0.650126	0.849631
ZKSCAN5	15.9005	-0.508104	0.217326	0.00209368	0.0243763
OGA	14.7634	0.140404	0.179367	0.262709	0.553315
AP2B1	16.9525	-0.0769371	0.157602	0.503347	0.758343
CYGB	14.4007	-0.328214	0.211526	0.02499	0.141767
MEX3A	13.4557	0.330951	0.242304	0.0392488	0.190147
PRRG3	13.7737	-0.0879036	0.171464	0.448341	0.717778
FOXO3	14.8785	-0.086285	0.163612	0.458149	0.726584
PRKCSH	13.4637	0.210437	0.20892	0.126641	0.37736
IREB2	15.3117	0.111455	0.170459	0.358819	0.649815
UBXN6	16.129	0.00879754	0.159842	0.939504	0.977029
POM121C	13.247	0.130019	0.179999	0.298019	0.593646
JAM3	17.4189	0.275942	0.207744	0.0574062	0.23941
PDCD5	16.1742	0.194665	0.197311	0.144832	0.406477
PBXIP1	20.1049	-0.253456	0.187125	0.0566209	0.238125
SEC24D	16.7431	-0.0537797	0.157385	0.637121	0.841094
RAB21	18.1193	-0.0408022	0.161013	0.720105	0.885466
ANXA11	15.9203	-0.499789	0.206391	0.00161809	0.0204755
HNRNPM	16.1816	-0.0135656	0.154691	0.903459	0.963296
RTRAF	16.003	-0.101195	0.166732	0.388941	0.676321
SORBS2	17.5573	0.832925	0.256005	0.000125129	0.00287346
CKMT2	16.4027	0.204339	0.20838	0.126778	0.37736
SEC14L1	18.6742	-0.259031	0.183987	0.0500208	0.21875
BCAR1	16.2017	0.145454	0.179352	0.247616	0.532966
EXTL3	16.2361	0.399363	0.246878	0.0185337	0.117672
MYO10	15.6267	0.164233	0.193847	0.204702	0.481945
C1QBP	17.4216	0.209472	0.193339	0.119729	0.369946
WNT10A	11.6062	-0.072716	0.171153	0.527561	0.773302
MBNL2	17.9136	-0.545962	0.205931	0.00077712	0.0117329
CYB5R3	16.7201	0.482464	0.240411	0.00680674	0.0585913
ZNF568	18.6009	-0.0966808	0.172092	0.4123	0.691855
CDKN1C	13.1823	0.415186	0.264975	0.0194446	0.121855
TIMP3	16.0557	-0.893159	0.203208	7.07751e-07	3.63886e-05
SAE1	15.3439	0.119749	0.171576	0.32819	0.622666
AHCY	15.4873	0.419579	0.246277	0.0151706	0.101714
PPP6R1	16.0781	0.141611	0.174487	0.257702	0.546122
SQSTM1	17.0872	-0.162016	0.178893	0.193079	0.468295
CHMP3	14.9803	-0.103159	0.16636	0.379476	0.665887
TNKS1BP1	14.3912	-0.0927792	0.167103	0.426812	0.702409
ETFA	16.5938	-0.124064	0.165651	0.295988	0.591044
ANK2	17.6103	0.207096	0.192827	0.122343	0.37274
RANBP2	11.676	0.0321475	0.168378	0.781025	0.914267
PLPP7	17.0076	-0.166086	0.174799	0.176837	0.448569
LMCD1	17.8133	-0.58778	0.200334	0.000273483	0.00516811
GGTLC1	17.9689	-0.480514	0.210714	0.00239383	0.0268929
CTDNEP1	14.938	-0.0826127	0.162276	0.47651	0.738377
MDH2	15.6134	0.862576	0.266496	0.000131616	0.00295721
RHEB	15.1259	0.0653707	0.163901	0.578795	0.806835
REEP5	17.4938	0.0561756	0.158354	0.621999	0.831128
ZMIZ1	13.6728	-0.055695	0.167775	0.62384	0.832042
LMAN1	15.3896	-0.119011	0.169432	0.316383	0.609382
TMEM250	13.2855	-0.0507696	0.16402	0.65703	0.853772
PHLDA3	17.9321	-0.587338	0.187228	0.000157105	0.00338339
AKAP6	20.1655	0.195841	0.186219	0.135118	0.393227
CTNND1	15.6243	0.100198	0.172931	0.406236	0.687273
NOTCH2	10.2461	-0.296566	0.246784	0.0456412	0.207135
SDHC	14.3647	0.24875	0.214989	0.0844909	0.302693
SKIL	11.852	0.0760562	0.173975	0.521603	0.768804
PCGF3	15.0302	0.00720332	0.158752	0.950799	0.98029
TMBIM6	14.2251	-0.0435241	0.161137	0.701593	0.875932
STMN3	14.4658	-0.513947	0.237415	0.00303322	0.0318883
NACC1	14.6763	0.0986241	0.174201	0.41373	0.693439
CPLX2	15.7573	-0.599948	0.206032	0.000301323	0.00554726
PNRC1	13.023	-0.0273481	0.162169	0.809229	0.922665
CARM1	15.9135	-0.439578	0.20614	0.00438076	0.0416683
PRDM5	13.0661	-0.249534	0.212017	0.0696104	0.271357
ARF4	17.6661	-0.218011	0.182227	0.0893805	0.314961
C6orf62	15.9337	0.0731667	0.163753	0.533751	0.776626
SLC25A6	14.8359	0.288956	0.264174	0.0598902	0.246772
MAVS	14.3438	0.0960037	0.171398	0.425409	0.702409
CAV1	19.7816	-0.267764	0.196968	0.0473685	0.211651
SERPINB6	15.0654	0.144033	0.175831	0.25208	0.538607
AGPAT1	15.4497	0.28411	0.22075	0.0572942	0.23941
RAB5B	15.6119	0.168994	0.191761	0.191717	0.467538
ATF7IP	15.4898	5.55679e-07	0.1563	0.998753	0.998928
MIDEAS	13.9492	-0.274859	0.2068	0.0497845	0.218004
TXNIP	16.0596	-0.893697	0.201235	4.48661e-07	2.6397e-05
UQCRQ	15.6472	0.249068	0.217396	0.0828341	0.300149
TAGLN	13.5249	-0.0530465	0.162837	0.643854	0.845679
RAB12	17.408	-0.228777	0.187331	0.0798319	0.295269
PCBP4	14.9957	0.107871	0.175609	0.371648	0.660335
CYC1	16.1897	-0.0515447	0.159201	0.649498	0.849631
TMED9	14.9207	0.803014	0.273292	0.000351875	0.00633485
PADI2	15.1014	-0.614621	0.230373	0.000604128	0.00965759
PLEKHD1	18.4127	-1.00212	0.209621	8.74992e-08	6.40203e-06
PSMB3	15.6087	0.0599061	0.16076	0.60328	0.822091
TUBB	11.7297	0.220949	0.224733	0.11708	0.365124
PPP2R1A	18.3411	0.279453	0.206839	0.0535942	0.2293
TNFRSF10C	14.9235	-0.478397	0.213694	0.00266942	0.0289776
MAP3K7CL	18.147	0.382814	0.245636	0.0217705	0.129659
ZNF428	14.4803	0.628278	0.272648	0.00242175	0.0270022
ATN1	13.2573	-0.136144	0.181505	0.261662	0.551717
MRLN	15.2921	0.929222	0.277135	8.36555e-05	0.00210318
ZNF362	14.4524	-0.475396	0.21344	0.0028132	0.030044
MED19	13.1563	0.0586786	0.169856	0.614173	0.828035
UQCRB	16.5402	0.0977111	0.168507	0.412935	0.692309
RBMXL1	14.4937	-0.108311	0.171496	0.357519	0.648709
FILIP1	16.0542	0.283659	0.221315	0.0572175	0.23941
PSMA1	15.8411	-0.149852	0.174347	0.221533	0.502435
MARS1	16.1481	0.0225093	0.156256	0.842342	0.938549
WIPI1	19.566	-0.267542	0.18713	0.0436756	0.203693
STT3A	15.8277	-0.125619	0.170934	0.300173	0.595344
H1-7	15.1391	-0.344577	0.21891	0.0213751	0.128815
SMARCA4	13.1541	0.465252	0.271189	0.0126227	0.0903862
POTEG	12.7825	-0.201975	0.206499	0.12629	0.376857
OS9	15.7481	0.176273	0.189385	0.176738	0.448569
EMILIN1	12.8646	-0.00219853	0.164914	0.981603	0.992912
ANK1	15.972	0.423998	0.248405	0.0144958	0.0987562
SDC3	13.3525	-0.0706563	0.165703	0.540694	0.781596
ATP5PO	17.1208	0.391241	0.248973	0.0197099	0.122336
MCU	15.5929	-0.120703	0.169096	0.309823	0.603071
SH3PXD2A	14.9857	0.055785	0.16021	0.629806	0.835885
TBC1D1	14.1726	0.810927	0.278336	0.000376624	0.00669594
SET	14.3889	0.0426	0.161266	0.709891	0.879133
UBE2E3	14.4146	-0.0364346	0.161001	0.748367	0.899137
RABL6	15.5465	0.0545837	0.159685	0.638112	0.841583
GNPTAB	14.9743	-0.0578342	0.158487	0.613736	0.827664
SELENOF	16.2093	-0.617362	0.204867	0.000203866	0.00409671
DCK	16.1613	0.0456083	0.158333	0.686594	0.871028
PLAT	13.1756	0.124288	0.180329	0.316076	0.608996
CLASP1	16.5801	0.0922359	0.170543	0.437729	0.710096
MKNK2	15.3216	-0.434108	0.243205	0.00843949	0.0678369
NET1	12.7787	-0.161887	0.187461	0.193305	0.468426
RAB39A	11.7682	-0.143054	0.184118	0.244612	0.529992
CREB3L2	15.121	-0.417846	0.207934	0.00621028	0.0545019
RPL11	13.932	0.419735	0.257959	0.0171814	0.111298
MYOD1	14.4741	0.44375	0.266597	0.0141935	0.097829
AGAP1	14.1641	-0.0932394	0.167457	0.425082	0.702409
EIF2S3	15.062	0.49713	0.25844	0.00767216	0.0633419
THY1	12.0243	-0.691474	0.333626	0.00197276	0.0236028
SLF2	12.0508	0.113469	0.184197	0.353664	0.645257
NDUFV3	15.5518	-0.032539	0.154397	0.772878	0.909106
RAP1B	14.2322	-0.0281701	0.15876	0.803233	0.920802
JUND	14.1375	-0.158895	0.178507	0.198334	0.476066
PKDCC	10.812	0.019756	0.16895	0.863681	0.947526
TMEM119	13.3648	0.0989253	0.180816	0.411522	0.691239
RSF1	16.8541	-0.332329	0.195899	0.0188501	0.119094
XBP1	15.2849	-0.042988	0.156806	0.705083	0.876669
MDK	12.671	-0.106169	0.175351	0.373887	0.662608
NDRG2	15.3494	-0.836812	0.207487	2.93196e-06	0.000115398
TM9SF2	15.7425	-0.0362199	0.158481	0.748775	0.899137
DELE1	15.0515	-0.161436	0.179709	0.191889	0.467538
MTURN	17.2353	0.583115	0.240653	0.00202221	0.0238939
ACVR1	16.3513	-0.149446	0.170361	0.217922	0.498468
BANK1	14.1908	-0.354097	0.209535	0.0170553	0.110862
LASP1	13.0296	-0.749045	0.220665	4.50962e-05	0.00122554
NDST1	13.8456	-0.12797	0.179518	0.288378	0.582163
PIGT	15.9172	0.0984805	0.165177	0.410311	0.690198
SNHG32	13.7357	0.14549	0.197126	0.24712	0.532395
PSMC5	16.6453	-0.0390191	0.155953	0.731005	0.891123
SEC61G	16.3291	0.0319676	0.158454	0.78191	0.914359
COPS6	15.1123	0.020183	0.155839	0.861071	0.946095
TCEA3	15.2153	0.0993954	0.173794	0.406464	0.687315
CDK11A	16.1134	-0.157128	0.174127	0.200044	0.477089
SLC35E2A	14.8844	-0.183752	0.194067	0.146706	0.408813
TEX13B	14.3831	-0.481712	0.211435	0.00253932	0.0278691
CDC42BPB	14.2368	0.139461	0.17884	0.270257	0.563979
CTSB	16.2723	0.0514652	0.158415	0.656568	0.853772
GJD4	15.7126	0.504928	0.256536	0.00686516	0.0587398
PEAK1	12.9041	-0.114575	0.175789	0.335033	0.629142
EIF3D	15.3296	-0.00446627	0.15713	0.967509	0.986691
DHRS1	16.0629	-0.0220371	0.191999	0.828626	0.9309
TOB1	15.7391	-0.593279	0.202776	0.000284531	0.00530539
CBX6	13.6367	-0.564231	0.221179	0.00089803	0.0129421
SUB1	14.1968	0.144723	0.18357	0.250825	0.537333
TIMM23B	15.3532	0.0801696	0.170863	0.496355	0.753236
EFEMP2	12.6817	-0.120663	0.177983	0.317275	0.610688
TRIM8	14.6985	0.342232	0.239874	0.0334226	0.172588
DCAF6	16.4241	0.303805	0.218174	0.0440609	0.204006
SMARCC1	15.4629	0.157988	0.183326	0.216357	0.496682
IPO7	16.2827	-0.11181	0.163793	0.341577	0.634151
PSMD4	17.0028	-0.0430141	0.155909	0.703633	0.876177
EEF1A2	19.0871	0.502872	0.248283	0.00555032	0.0499616
KLF5	16.1114	0.0877208	0.16239	0.460223	0.727292
IST1	15.8152	0.110562	0.171042	0.362261	0.651337
CCDC86	13.9377	-0.218735	0.199577	0.0997811	0.335168
OTUD4	16.2419	0.101136	0.168089	0.39896	0.682755
MXRA7	17.0979	0.465788	0.269624	0.0111718	0.0828272
PJA2	14.4518	0.0607732	0.169734	0.600022	0.820977
ALG2	8.60631	-0.978845	0.27383	1.51474e-05	0.000488397
NR2F2	15.1389	-0.25711	0.204152	0.0592323	0.244778
GATA2	13.9102	-0.445566	0.22178	0.00541406	0.0488893
CHCHD10	15.0603	0.0152326	0.159658	0.892225	0.960741
PAFAH1B1	14.5389	-0.0163431	0.159147	0.884412	0.957204
SEPTIN4	15.0191	0.935258	0.286041	0.000107403	0.00256464
SRSF6	13.28	0.076203	0.168876	0.519345	0.768067
TXLNB	16.3555	-0.106843	0.163292	0.362022	0.651337
KIAA0100	14.5469	-0.259552	0.202333	0.0589587	0.244144
RBM5	13.9033	-0.0636316	0.167283	0.578179	0.806173
LSM4	15.8284	0.126339	0.175929	0.302908	0.597957
ADAM9	14.183	-0.218697	0.200628	0.101542	0.338363
ITGB1BP2	17.8184	0.475286	0.240234	0.00705372	0.0597264
ZCCHC24	14.1147	0.281945	0.231294	0.0615055	0.250902
TEAD1	15.5756	-0.115753	0.170295	0.329288	0.62392
PLEKHO1	16.0979	-0.182985	0.182141	0.144833	0.406477
TOX4	14.3899	-0.0778606	0.162098	0.501643	0.756975
MACO1	15.1251	-0.0497367	0.161463	0.662026	0.855954
EPN2	13.1578	-0.223264	0.199573	0.0933962	0.323184
CTSZ	15.214	0.0758958	0.163692	0.519357	0.768067
PRPF4B	13.0302	-0.192199	0.193189	0.135817	0.393656
REEP1	15.6052	0.183996	0.197824	0.164424	0.432825
UBAP2L	15.0111	-0.0416506	0.161181	0.714471	0.882191
LUC7L3	11.3993	0.373882	0.275463	0.0318546	0.167552
CCNY	15.4418	0.0945142	0.169104	0.427944	0.702409
SLC25A11	14.3612	-0.0409489	0.159942	0.718386	0.885054
FST	14.5768	0.0341093	0.159192	0.764748	0.905481
VSIG10	14.4493	-0.189791	0.193743	0.140309	0.399972
PET117	14.5815	-0.0552942	0.166118	0.629215	0.835499
S100A10	12.8294	-0.164332	0.194397	0.197238	0.474753
SLC12A4	15.0953	-0.241739	0.207012	0.0764891	0.288134
RCN2	16.7358	-0.0795954	0.159187	0.489381	0.747333
ADGRL1	13.7383	-0.471609	0.237131	0.00478058	0.0444276
ATP6V0E1	17.9222	0.5924	0.244969	0.00194818	0.0234069
MAPRE3	18.1243	0.401796	0.226401	0.0142956	0.0981768
SNRPD3	14.2615	0.24118	0.212702	0.0912845	0.319804
SCAMP2	15.296	-0.201411	0.19	0.118492	0.367719
PRPF8	14.9747	0.00981609	0.159171	0.932347	0.975181
STX5	14.7805	-0.0444085	0.161456	0.696646	0.87419
SPANXA1	14.4771	-0.15006	0.178947	0.219639	0.499879
LRP5	13.8883	-0.0864669	0.168268	0.458395	0.726638
KDM5C	14.4713	-0.0967156	0.165166	0.409519	0.690198
MRPL20	13.1352	0.528089	0.27806	0.00741943	0.0615446
ORMDL3	14.8244	0.00967605	0.158881	0.933515	0.975181
BNIP3L	14.4114	-0.422309	0.218717	0.0069674	0.0592592
HECTD4	14.9769	-0.12427	0.170202	0.297683	0.593575
SIRT6	16.9477	0.164198	0.280085	0.101835	0.338877
FBXO10	14.2751	0.420697	0.247957	0.0156307	0.104183
ZNF267	13.6509	-0.132389	0.180383	0.274291	0.56799
CUL3	13.662	0.0234169	0.16641	0.836775	0.934718
MRPL55	13.6777	0.216842	0.209558	0.118868	0.368484
RGS7BP	15.1601	-0.340623	0.210079	0.0199713	0.123349
COX7B	14.9254	0.176205	0.196834	0.177821	0.449965
FBN2	6.38707	-1.30271	0.296233	6.11103e-07
THBS1	14.9218	-0.374045	0.218313	0.0138158	0.0966257
TRIM66	12.6175	-0.338448	0.224991	0.0244846	0.139874
ABITRAM	12.9325	-0.0933203	0.171266	0.424884	0.702409
DNAJB6	16.9521	-0.0910622	0.165703	0.43228	0.705927
KIAA0754	14.2017	0.0681378	0.163195	0.562526	0.79804
NSD2	11.3872	0.127407	0.18963	0.304278	0.598266
COX8A	14.7881	0.508743	0.261944	0.00707626	0.0598285
PPME1	17.0668	0.20086	0.186504	0.126267	0.376857
ADAMTS2	16.1271	-0.518103	0.219151	0.00191912	0.0232109
DMWD	12.7279	0.00497799	0.163545	0.966478	0.986652
PTCD3	14.7594	-2.83311e-05	0.160484	0.998572	0.998922
FLYWCH2	13.2891	0.13404	0.183309	0.280475	0.574678
SNU13	14.9839	0.217446	0.205864	0.114674	0.361173
FAM114A1	13.9014	-0.0347919	0.161795	0.759139	0.902332
IRF2BP2	14.1951	-0.0782066	0.16657	0.49938	0.755356
DGCR2	13.5764	0.0168797	0.16421	0.884922	0.957363
DNAJB11	16.033	0.107415	0.171095	0.374207	0.662608
USF2	13.6843	0.0969694	0.173609	0.417579	0.69784
HSPE1	14.2523	0.186869	0.197798	0.159438	0.425789
LDHC	16.0697	0.0627657	0.162417	0.591984	0.815934
AKIRIN2	16.248	-0.696058	0.204508	4.37192e-05	0.00119381
MAPK8IP3	14.9586	0.0560257	0.162007	0.63043	0.835945
PKIA	17.2557	0.76181	0.267161	0.00041859	0.00721611
CLPTM1L	15.9287	0.636272	0.263122	0.00173476	0.0217111
HIF1A	14.6804	-0.005056	0.157823	0.948052	0.979371
PREPL	15.2239	0.320177	0.246223	0.0434551	0.203438
SNTB1	16.0951	0.030555	0.1575	0.790502	0.917323
UBE2V1	14.0568	0.292527	0.234398	0.0560966	0.236268
HM13	14.9364	-0.0483858	0.156874	0.670378	0.861106
ARHGAP26	13.1663	-0.510329	0.229233	0.00246816	0.0273511
COPB1	14.9796	-0.0134906	0.158277	0.904066	0.963313
GRIN2A	14.0464	-0.214801	0.193587	0.101562	0.338363
ZC3H13	13.3314	0.32238	0.237404	0.0419712	0.199442
UBE2D3	15.5385	0.0232381	0.158302	0.839064	0.936175
MAP2K3	15.3547	-0.297785	0.225935	0.040647	0.195093
B4GALT1	15.7649	-0.779029	0.205351	1.00733e-05	0.000340167
HNRNPA0	12.6255	0.377718	0.266103	0.0282008	0.154752
GGNBP2	16.1164	-0.323718	0.200315	0.022299	0.131467
CACNG1	16.8374	0.51597	0.250186	0.00528556	0.0479566
SHC1	12.7841	-0.124361	0.180259	0.304532	0.598266
FABP3	14.3263	0.377955	0.255684	0.0255705	0.144201
AARS1	14.1399	-0.0274863	0.158919	0.806905	0.921923
GTF3C6	15.077	0.0705005	0.161521	0.551371	0.789244
ZNF638	13.1666	0.00839556	0.159963	0.942701	0.977387
SREBF2	13.5412	0.0833986	0.168312	0.484122	0.744123
FADS1	13.1017	-0.426138	0.237199	0.00866692	0.0691103
S100A11	14.5697	0.08557	0.177122	0.47123	0.734633
ZFAND5	13.9753	-0.586933	0.21545	0.000559327	0.00912022
CMYA5	17.879	-0.239246	0.216211	0.0813309	0.297155
ACLY	13.3834	0.145823	0.189342	0.250699	0.537266
SRCAP	13.7636	-0.135954	0.175788	0.261181	0.551242
C1orf105	14.746	1.02258	0.295054	5.27192e-05	0.00139939
PDLIM1	14.5104	0.565381	0.26616	0.00421418	0.0407633
SH3D21	12.3197	-0.119368	0.178746	0.31879	0.612521
GOT1	14.3958	0.045842	0.164108	0.69224	0.872563
PLG	14.521	-0.237291	0.194387	0.0746263	0.28355
PMP22	16.4343	-0.326462	0.227946	0.0292159	0.158043
SNRPD2	14.2997	-0.0205167	0.162456	0.853078	0.941686
PEA15	16.5522	0.40213	0.232255	0.015695	0.104396
JOSD2	14.4661	0.0632633	0.16605	0.589591	0.814523
INTS6	15.6754	-0.33991	0.207076	0.019535	0.121944
NDUFB8	14.2353	0.521333	0.269615	0.00693148	0.0590417
HNRNPAB	14.2089	0.3995	0.263036	0.0216076	0.12926
STRAP	13.5457	0.239844	0.215458	0.0938158	0.323704
TAOK1	14.9068	-0.156063	0.178737	0.204932	0.482288
CSNK1D	13.7565	0.0553899	0.165664	0.634759	0.83987
SOX9	15.6747	-0.167771	0.180738	0.177759	0.449965
ELOB	13.4906	-0.135866	0.182678	0.26327	0.554012
PAFAH1B2	15.3117	0.060049	0.161638	0.608922	0.825164
WSB1	11.1584	-0.520416	0.245203	0.00310581	0.0324632
CDK4	14.2095	0.00873503	0.162915	0.939074	0.977029
EIF1AX	15.139	0.13297	0.18244	0.28754	0.581294
BRK1	13.2335	0.0226282	0.162872	0.84433	0.938902
NDUFB6	13.9099	-0.0189977	0.160478	0.865847	0.948265
HUWE1	16.6314	-0.380519	0.21401	0.0122031	0.0887174
OLA1	13.7209	0.0842572	0.170774	0.480787	0.740632
DUSP1	14.7527	0.256465	0.21199	0.0756078	0.285724
CDC42EP1	16.0343	0.500918	0.260848	0.00734208	0.0612592
PAPOLA	13.683	-0.000270981	0.160341	0.996867	0.998922
MLIP	14.9089	-0.364756	0.214533	0.015283	0.102131
ANXA1	13.6875	0.00158184	0.16175	0.990199	0.996836
SLIT3	14.3181	-0.590605	0.238534	0.00120665	0.016549
SF3B3	12.6144	-0.0999368	0.172156	0.396906	0.681842
SMARCAD1	14.5231	0.020073	0.161605	0.861732	0.946115
EZR	14.3909	-0.00686764	0.157405	0.918084	0.968943
IRGQ	15.3555	0.374203	0.250687	0.0252383	0.142892
LRRFIP2	13.7678	-0.241896	0.197988	0.0711001	0.275471
TSNAX	14.4159	-0.34526	0.212247	0.0195513	0.121944
ALKBH5	13.6893	0.114579	0.17585	0.348472	0.641733
TARDBP	13.7847	0.0361953	0.16243	0.748992	0.899137
PIGS	14.5286	0.0729991	0.167699	0.53682	0.778956
NDUFB9	15.6915	0.115555	0.179108	0.340165	0.633101
GSPT1	14.3493	-0.0356824	0.158727	0.754215	0.900621
PDGFRA	12.5868	-0.303493	0.254504	0.0407071	0.195093
PRPF38B	11.6512	0.0619297	0.16947	0.5906	0.814733
PSMD8	16.4973	-0.0453755	0.157338	0.688831	0.872316
SNRPN	13.5666	0.240287	0.216053	0.0928483	0.322511
ECM2	14.355	-0.166815	0.180739	0.18021	0.452705
PTGES3	15.3126	-0.278602	0.20109	0.0440984	0.204006
FZD4	12.9964	-0.875554	0.214844	2.74447e-06	0.000108769
SULT1A4	12.5177	-0.0980072	0.177617	0.403819	0.685076
WDR6	14.3723	-0.111058	0.16927	0.348232	0.641498
CD59	15.9731	-0.101029	0.164167	0.392418	0.679099
RGMA	11.9391	0.156046	0.194789	0.22317	0.504171
SRP9	12.7505	0.530623	0.298727	0.00879137	0.0694681
SH3YL1	11.8771	-0.0860684	0.172572	0.46162	0.727681
YAP1	13.2829	0.0539752	0.190636	0.613159	0.82766
PAIP2	15.8227	-0.506802	0.205325	0.00142623	0.018541
COBL	15.0685	0.444874	0.253689	0.0124569	0.0897618
PPM1G	12.7195	0.203893	0.208024	0.136468	0.39514
LTBP1	13.0836	0.102798	0.180307	0.394086	0.68078
KCNMB4	13.484	-0.128844	0.174611	0.286574	0.580575
PCDH11X	14.3877	0.0219474	0.160495	0.846047	0.939655
PTK2	14.0676	0.139005	0.181451	0.26846	0.561621
EOMES	11.6582	-0.50937	0.260976	0.00444566	0.0421451
PFKL	13.5643	0.371446	0.250908	0.0272586	0.151034
UTP11	13.3929	-0.0402764	0.169895	0.721483	0.885983
GABARAPL1	13.0438	-0.248475	0.209455	0.0703499	0.27335
KHSRP	13.0313	0.276046	0.232396	0.066844	0.264783
MCRIP1	13.748	0.405335	0.253646	0.0197427	0.122336
SYTL5	13.0593	-0.0324291	0.163983	0.774888	0.910469
SMDT1	14.487	-0.124107	0.172942	0.298731	0.594249
SPAG9	13.6563	-0.2495	0.202591	0.0671311	0.265685
BCL9L	15.2084	-0.273874	0.215211	0.0508109	0.221188
COX7A2	14.0552	0.240207	0.215702	0.0937376	0.32363
ZRANB2	13.3033	-0.182449	0.200926	0.151911	0.415191
COL13A1	12.476	-0.24527	0.21498	0.0754892	0.285724
PGAM2	13.6748	-0.946411	0.309763	0.000125626	0.00287346
PPDPF	13.7689	-0.0659229	0.171641	0.565597	0.799085
FGFR1	13.2744	-0.413441	0.23645	0.0103779	0.0782385
ADRM1	15.896	0.26202	0.219846	0.0719721	0.27753
EHD1	14.508	0.609633	0.268713	0.00274902	0.0296571
PTPN21	12.7117	0.137169	0.190602	0.27336	0.566847
RDX	14.9913	-0.0735378	0.160685	0.529645	0.774725
IGFBP2	11.6996	-0.150286	0.188974	0.223564	0.504501
DCAF1	12.1321	-0.7051	0.223135	0.000106014	0.00254212
NFYC	15.1057	0.0560953	0.162124	0.629794	0.835885
UBE2G1	15.0239	-0.131038	0.173284	0.276902	0.571393
SS18	11.8558	-0.132739	0.186091	0.274401	0.568011
MARK4	13.5652	-0.0498362	0.162726	0.662634	0.856158
TRA2A	15.3656	-0.0484188	0.170084	0.665417	0.857425
SDK2	12.0944	-0.0772128	0.170599	0.504752	0.759256
PALMD	17.0852	-0.160045	0.174795	0.191779	0.467538
RUNX1	14.8672	-0.158728	0.185113	0.201686	0.479193
CNOT11	13.8917	0.14187	0.182243	0.262151	0.552473
MRPL33	13.1415	0.186641	0.203262	0.162209	0.429971
ZBTB18	14.9513	0.166431	0.185668	0.194563	0.469898
RERE	13.6631	-0.0269814	0.162763	0.811509	0.923841
TMEM38A	16.3443	-0.182854	0.193922	0.152059	0.415215
PPP1CC	12.4475	0.307021	0.242679	0.0508018	0.221188
SLC36A1	11.7462	0.235536	0.230281	0.102143	0.339237
FUBP3	13.7707	-0.236207	0.205103	0.0816241	0.297523
AGAP3	14.284	0.159615	0.192286	0.2147	0.495068
GPKOW	14.163	-0.0478942	0.159485	0.674413	0.863751
PLPP4	11.4644	-0.0938421	0.178284	0.423654	0.701827
EFR3B	13.1685	0.111783	0.179874	0.358638	0.649761
MAGEA8	11.2665	-0.119514	0.18235	0.318944	0.612521
ELL	13.7427	0.202954	0.206183	0.136766	0.395375
AXL	14.4083	-0.145054	0.176231	0.234954	0.517801
TMEM9	13.1388	-0.0537522	0.169101	0.636806	0.841094
EIF2S2	16.4367	0.0324177	0.157343	0.774034	0.910056
ARFGAP1	11.6783	-0.272363	0.227949	0.0575067	0.239514
NRK	14.1306	0.226232	0.209354	0.106488	0.347251
YTHDC1	13.9775	-0.114374	0.172403	0.333833	0.627324
SMARCA5	13.6766	-0.0056815	0.16243	0.957007	0.983545
PRDX5	14.0502	0.0854187	0.170131	0.472458	0.735492
AKR1E2	11.1761	-0.0263923	0.169336	0.813162	0.924262
ACSL4	14.0595	-0.0482173	0.160216	0.673311	0.862727
DDX4	12.771	0.177425	0.244226	0.98243	0.993396
GOLPH3	15.6849	-0.237806	0.193825	0.073717	0.282161
RANBP1	12.1618	0.39344	0.278763	0.026237	0.147087
CD164	15.0419	0.0405879	0.163395	0.725414	0.887637
PGD	13.3455	0.212905	0.207721	0.123208	0.373592
NARS1	14.9376	-0.00960667	0.158112	0.931399	0.975181
LTBP3	9.81717	-0.30151	0.25791	0.04577	0.207135
NAP1L4	14.3469	-0.072536	0.164006	0.529138	0.774504
TMEM263	13.1318	0.0594194	0.165786	0.612055	0.827189
LIMA1	12.8645	-0.0926185	0.17124	0.42869	0.703027
HOMER2	12.7896	0.35883	0.256034	0.0322993	0.169112
UBE2I	13.5158	-0.377067	0.222446	0.0146698	0.0994071
SERPINE1	15.1202	-0.0815147	0.167099	0.479316	0.739627
EFTUD2	15.2342	-0.0944945	0.170135	0.419162	0.698723
RAP2B	15.5033	-0.0210809	0.164447	0.85093	0.941247
CPTP	12.1217	-0.0544027	0.169486	0.63399	0.839596
LDB1	12.8469	0.0406912	0.166782	0.656068	0.853667
ENDOD1	13.4117	0.278177	0.233965	0.0663182	0.263931
FAM90A1	15.201	-0.0665564	0.165411	0.560435	0.796217
FEM1A	12.4034	0.132422	0.186939	0.289319	0.583237
GOLGA4	15.2208	-0.184144	0.185258	0.145226	0.406477
SCARB2	12.0727	0.155395	0.196796	0.226934	0.50868
PSMD14	14.623	-0.0616256	0.160664	0.590883	0.814927
WNT10B	14.4551	-0.143985	0.175839	0.237029	0.519308
APMAP	11.5266	0.0340476	0.169943	0.76698	0.906549
AK2	13.3492	0.410084	0.262342	0.019943	0.12331
SPIN2B	13.2993	0.0809862	0.175814	0.491592	0.749224
RASA3	12.8112	-0.233086	0.207504	0.0850182	0.304009
SNRPB2	12.6304	0.138967	0.187851	0.266757	0.558696
SEM1	15.613	0.0840561	0.174259	0.476411	0.738377
PDCD6	10.4519	0.017673	0.172587	0.878887	0.955008
IQSEC1	13.2156	-0.0166618	0.161661	0.882908	0.956382
FAM118A	13.3702	-0.377591	0.223599	0.0140699	0.0970979
ZC3H4	12.5875	-0.0176063	0.164713	0.8736	0.952548
PAMR1	16.1799	0.087505	0.168499	0.460844	0.727681
PEBP1	13.9027	0.118493	0.177469	0.336343	0.629554
SMAD1	13.5044	0.0439189	0.160703	0.706421	0.877415
MICOS10	13.4929	0.0108876	0.162685	0.925253	0.971529
ZNF333	14.6893	-0.0499254	0.165486	0.664102	0.856891
FAM120A	13.8772	0.0945474	0.173342	0.43142	0.705594
CTBP1	13.8042	0.0281594	0.161138	0.856167	0.944182
SEL1L	13.8605	-0.105014	0.171366	0.374712	0.662608
DCAF8	12.4843	-0.0448529	0.168802	0.693102	0.872563
RHBDF1	14.79	-0.0554559	0.162544	0.628659	0.835333
RAB35	13.9647	-0.00926342	0.160585	0.93386	0.975181
SSB	14.6307	0.309521	0.232616	0.0450152	0.206347
KIAA2013	15.1246	0.0664767	0.171807	0.567539	0.799755
VDAC3	15.2303	0.160725	0.189677	0.20986	0.488728
FIBIN	8.68362	-1.14887	0.271268	8.67814e-07	4.233e-05
BCAP31	15.5572	-0.0588036	0.157956	0.606993	0.824674
BTG1	13.3419	-0.321489	0.220481	0.0289672	0.157145
WSB2	13.5588	0.127724	0.181469	0.303974	0.598266
GABARAPL2	14.4865	0.101472	0.17021	0.401	0.684036
ATG9A	12.4494	0.0309894	0.163522	0.789927	0.917323
NHSL1	14.3381	0.19925	0.200697	0.140521	0.400175
NR1H2	11.8272	0.0959354	0.180037	0.425016	0.702409
CKAP4	10.1276	-0.323592	0.246263	0.0336598	0.172904
ATP2C1	15.0685	0.0191997	0.163035	0.866611	0.94837
PFN2	12.2635	-0.0943145	0.175654	0.421265	0.700104
GGA3	13.2894	-0.0402967	0.16423	0.722584	0.886073
PSMD13	13.981	-0.0660458	0.16776	0.567369	0.799755
FAM171A1	13.9637	0.00105401	0.161457	0.993857	0.997932
TMCO1	13.7726	0.0771323	0.168668	0.516127	0.76665
RGS3	14.2427	-0.269917	0.218116	0.0535983	0.2293
FXYD6	10.8627	0.0120301	0.167719	0.918125	0.968943
HSPB6	12.6784	-0.775638	0.239706	6.14477e-05	0.00157965
ADGRA3	12.5856	-0.120635	0.177133	0.313483	0.606045
FHIP1B	12.9918	-0.118714	0.174213	0.320369	0.613952
LZTS2	11.2178	0.0925874	0.179609	0.441933	0.713701
FBN1	9.91466	-0.493587	0.266209	0.00557184	0.0500764
FOSL2	13.139	-0.0283423	0.162144	0.802692	0.920802
B4GALT5	14.4746	0.239447	0.213363	0.0931994	0.322944
CDK3	13.8827	-0.441435	0.226787	0.00628968	0.0548857
SSR1	11.5319	0.0677162	0.174693	0.565377	0.799085
SRP14	13.8475	0.38078	0.27605	0.0277766	0.153013
REX1BD	13.1381	0.125446	0.182467	0.307437	0.600948
RBM3	13.2984	0.374785	0.258082	0.0275062	0.151816
THRA	12.9959	-0.0938033	0.173534	0.426552	0.702409
ZNF703	12.219	-0.381499	0.239804	0.0156448	0.104183
VAPA	15.5256	-0.210859	0.196776	0.106202	0.346736
SPPL3	13.0803	-0.42896	0.233321	0.00952008	0.0734069
GLUL	14.5746	-0.150753	0.184401	0.217711	0.498187
ZFAND6	13.9743	-0.0292355	0.160435	0.796796	0.918529
LRIG1	13.1199	0.146273	0.191321	0.247747	0.532966
FXR2	14.3132	0.00764749	0.158662	0.947837	0.979371
SEC11A	13.3085	0.425608	0.278639	0.0187053	0.118481
STT3B	14.3723	0.104897	0.173017	0.385252	0.671748
TNIK	12.2756	0.0193795	0.166284	0.86601	0.948265
POMP	12.6798	0.0452729	0.167457	0.696298	0.87419
AHSA1	14.7503	0.00842756	0.156746	0.940906	0.977029
ALG12	13.9254	-0.393268	0.224992	0.0115423	0.0848867
ADSL	14.8203	0.146678	0.188201	0.241981	0.526692
LRRC17	11.4385	-0.535184	0.252268	0.00313517	0.0327101
CD27	12.0191	-0.671137	0.237591	0.000340156	0.00616277
RPL7L1	13.146	0.290681	0.239332	0.0591741	0.244715
AGAP9	11.8473	-0.189149	0.205585	0.141817	0.402255
SIRT2	11.9443	-0.0631495	0.172419	0.581815	0.807986
MTMR10	13.2627	0.00400555	0.163488	0.973218	0.989307
CAMK2D	14.3752	0.0676063	0.164735	0.565762	0.799085
NDUFB7	12.7346	-0.0917748	0.174578	0.432098	0.705927
PRXL2A	14.0749	0.0490418	0.164363	0.666195	0.858234
TERF2IP	12.7099	-0.00916699	0.163272	0.934724	0.975223
TRIM61	13.348	-0.122515	0.176543	0.309436	0.60291
RANBP9	13.8855	-0.0503255	0.165463	0.658338	0.854232
MCM5	11.9715	-0.327369	0.241941	0.0333856	0.172583
KIAA1143	16.9661	0.0717558	0.17854	0.533254	0.776347
SSR3	14.6773	0.520319	0.26449	0.00653117	0.0566465
WBP4	13.2937	-0.35084	0.223166	0.0203269	0.12447
SUGP2	12.14	-0.212987	0.207877	0.108169	0.350155
NDUFS6	12.1136	0.582505	0.305381	0.00622689	0.0545019
RBM42	14.8506	-0.00550789	0.157405	0.959416	0.983783
EBNA1BP2	14.9757	-0.00573181	0.157612	0.958476	0.983545
ERH	12.9374	0.147333	0.188536	0.246563	0.531999
NDUFB2	14.5996	0.0250365	0.160081	0.825213	0.930178
VAPB	14.4595	-0.141346	0.176669	0.246132	0.531979
AKR1A1	12.0101	-0.0199415	0.166411	0.85919	0.945324
UBL3	12.1033	0.0785129	0.176489	0.506168	0.760721
AP2A2	13.9626	-0.209176	0.203503	0.112042	0.358039
MYH7B	14.7215	-0.0509815	0.168753	0.654544	0.852071
RBM38	14.3213	0.0782693	0.167668	0.509684	0.762923
NME1	13.5133	0.699488	0.288503	0.00161639	0.0204755
ZNF516	13.0762	-0.0742293	0.168137	0.52008	0.768536
CDR2	13.7022	-0.0182602	0.162188	0.871191	0.951193
CHMP1A	13.5364	0.0911602	0.172273	0.445958	0.715149
ATAD1	14.8488	-0.197628	0.191345	0.124893	0.375201
HDAC2	13.6707	-0.00787703	0.165157	0.939062	0.977029
TENM3	13.7609	0.195394	0.204543	0.148073	0.41042
TYK2	13.2656	0.0393188	0.168208	0.733465	0.892133
PGM5	14.0838	0.165285	0.187866	0.202748	0.480715
SMC1A	12.9217	-0.0779288	0.169789	0.501193	0.756696
MAGT1	16.7636	0.0650948	0.158269	0.579142	0.806948
ASAH1	15.319	0.31784	0.246811	0.0438732	0.203832
ZNF521	12.1551	-0.621318	0.241173	0.000688621	0.0106503
PITX1	12.9404	-0.268627	0.215398	0.0558159	0.235605
TTC31	14.0716	-0.0642743	0.166817	0.574124	0.803663
ARPC1A	13.8462	0.0573413	0.167782	0.623262	0.831958
ABL1	12.131	0.0332794	0.165541	0.744402	0.897643
COL27A1	10.5667	-0.0797203	0.180256	0.492255	0.749487
FAM3A	11.7419	-0.195461	0.20368	0.134911	0.393225
MYL5	13.2446	0.0411714	0.170139	0.717622	0.884718
CREB3L1	14.0957	-0.0571964	0.171884	0.617514	0.829291
GJC3	14.2579	0.0817443	0.169879	0.491306	0.749101
SRRM3	14.1916	-0.159199	0.188842	0.200254	0.477208
NF2	14.1643	-0.227546	0.197947	0.0876059	0.311035
MED13L	11.9867	0.0257924	0.166296	0.823198	0.929379
EEF1B2	12.3795	0.249343	0.241079	0.0886459	0.313456
EIF4A3	14.2631	0.0318553	0.161563	0.777917	0.911804
STX4	13.5777	0.268859	0.232019	0.071237	0.275814
METAP2	14.6877	-0.0540787	0.161022	0.636593	0.841094
INF2	12.9238	-0.0484362	0.167718	0.670829	0.861106
DKK3	14.7337	-0.0783624	0.165135	0.499512	0.755356
DDX3X	13.3976	-0.0785105	0.168481	0.498438	0.754537
TUSC3	12.5515	0.186869	0.203795	0.164254	0.43258
ZNF548	12.4641	-0.077261	0.170469	0.502606	0.757739
TRMT112	14.146	0.167885	0.197235	0.197332	0.474778
NDEL1	13.0207	-0.206356	0.208567	0.116413	0.364636
SMARCC2	12.6914	-0.295582	0.230773	0.0451884	0.206808
GATD3A	15.0781	0.0380497	0.16456	0.740756	0.896036
INPP4B	13.3481	-0.107166	0.170735	0.365355	0.652894
KIF2A	12.4327	0.272722	0.245846	0.0738126	0.282256
SCT	15.2243	-0.00874082	0.15995	0.937284	0.976288
IMMT	13.3289	0.0838016	0.169751	0.481649	0.741509
OLFML2B	10.6698	-0.00174427	0.171056	0.986429	0.99529
YWHAQ	12.301	0.0283712	0.166344	0.805073	0.920937
NR4A1	14.6584	-0.218746	0.200463	0.0976652	0.329808
ARF5	15.7268	-0.113379	0.167044	0.33704	0.630238
MUC21	12.4083	-0.376425	0.228697	0.0152647	0.102129
ODC1	15.866	-0.2516	0.19314	0.0597122	0.246361
TXLNA	11.3723	0.21665	0.225066	0.123254	0.373592
MFN2	14.3277	-0.0141875	0.168224	0.89392	0.961297
IRF9	11.5014	0.00210096	0.166966	0.98657	0.99529
TEAD2	11.8467	0.169788	0.204943	0.192568	0.468113
PRR12	12.8772	-0.0397045	0.164715	0.726571	0.888101
H1-2	10.9253	0.259189	0.240934	0.0834078	0.301185
MSI2	15.1971	-0.270974	0.205432	0.0506842	0.220974
WDR26	14.0029	-0.122177	0.175935	0.308568	0.60205
NBR1	14.5454	-0.0849712	0.165295	0.464235	0.729771
RCC1L	12.2542	-0.0632991	0.168353	0.580976	0.807986
PPP6C	13.3046	-0.0984122	0.175185	0.401568	0.684197
KRTAP9-4	13.2138	-0.290243	0.225655	0.0439934	0.204006
SLC44A2	13.1982	0.235858	0.219891	0.0982276	0.330924
ATG4B	10.9686	0.410778	0.289952	0.0246811	0.140715
TFDP2	13.0644	0.0461862	0.164328	0.690632	0.872316
USP14	14.2503	-0.0571561	0.162891	0.617629	0.829291
CMA1	13.3269	-0.347122	0.229127	0.0218902	0.129998
ZNF334	12.4616	0.138381	0.190938	0.268845	0.562013
ZNF146	11.2994	0.165668	0.213577	0.199636	0.477089
DHX15	12.1108	-0.10317	0.184327	0.382597	0.668754
NT5C2	15.6231	-0.337826	0.211574	0.0211233	0.127567
TAGLN3	10.3565	-0.045954	0.173737	0.686191	0.871017
FADS3	14.8549	-0.0294749	0.160261	0.794495	0.918092
MRPS34	13.2561	0.0994391	0.174064	0.409898	0.690198
TSR3	14.7095	-0.166477	0.183682	0.181459	0.454217
ERBB3	12.3698	0.189062	0.209612	0.158831	0.424965
UBE4B	13.1224	-0.154317	0.184429	0.216158	0.496425
KAT7	12.2355	-0.00549915	0.162769	0.960313	0.983783
NICN1	12.6767	-0.0483185	0.167024	0.670956	0.861106
NPTN	14.6669	0.473728	0.257109	0.0096661	0.0742795
RSRC2	13.2208	0.129123	0.182452	0.29941	0.59449
GFPT1	13.6366	0.255065	0.222995	0.0807291	0.296093
TMEM248	12.001	0.00324825	0.167033	0.978947	0.991455
MTSS2	14.1195	0.630685	0.277836	0.00258015	0.0282628
RER1	13.468	0.027322	0.162387	0.748166	0.899137
ISCU	11.6748	0.112638	0.184722	0.356304	0.648425
C1orf43	13.0783	0.123957	0.185326	0.314432	0.606965
TMEM214	11.9844	0.117431	0.18433	0.335503	0.629227
TMED10	13.7095	-0.0759275	0.165287	0.511879	0.763743
CAPN2	13.5056	0.0150848	0.16363	0.895835	0.961906
PSMD6	13.7924	-0.0458616	0.159341	0.688164	0.87197
CCAR1	14.9716	-0.38903	0.227186	0.0124431	0.0897618
SCX	9.74021	-0.157002	0.20689	0.206278	0.483766
YY1	12.1713	-0.0972234	0.174986	0.408557	0.689425
LUC7L2	12.2687	-0.0719812	0.169664	0.531582	0.775892
BMP1	10.3968	-0.30804	0.2511	0.0417823	0.198709
IGF2BP2	11.5137	-0.130216	0.195722	0.283991	0.578009
TMED3	15.2069	-0.05738	0.16178	0.6153	0.828997
RPS6KB2	11.5463	0.128419	0.189137	0.301587	0.596437
MRPS24	13.0438	-0.0608282	0.165345	0.597236	0.819333
ACTR2	13.6488	0.0190599	0.163204	0.870819	0.951151
MICALL2	12.7585	0.39977	0.514915	0.208959	0.487743
LRPAP1	13.9546	0.328192	0.240801	0.0399661	0.192967
RPS27L	13.2172	0.260393	0.227821	0.0776098	0.290248
ACAA2	13.8636	0.242162	0.21969	0.092038	0.320868
COQ9	13.5849	0.0330794	0.166328	0.719973	0.885466
CRMP1	12.7336	0.253624	0.228548	0.0844909	0.302693
VGLL3	13.0003	0.281469	0.235611	0.064731	0.260307
TCF25	13.3965	0.119274	0.18246	0.332116	0.625782
SLC6A8	12.8235	-0.124716	0.177148	0.299141	0.59449
PLPP3	11.1913	-0.152467	0.19516	0.222631	0.503588
GLIS2	10.4978	-0.12381	0.187052	0.30378	0.598266
RAB5C	11.938	0.0861945	0.177639	0.46925	0.733099
CDC42EP3	14.3753	-0.037276	0.164818	0.743405	0.897148
NDUFB3	14.0191	0.0772795	0.169936	0.511872	0.763743
ELOC	14.0026	0.0316226	0.165498	0.785892	0.915838
FBRS	12.2139	-0.0830766	0.175013	0.47572	0.737954
UBE2K	12.6738	-0.174556	0.188095	0.167961	0.437501
RAF1	12.1812	0.0407645	0.167831	0.724055	0.88677
SSBP3	14.0437	-0.057689	0.162688	0.614316	0.828035
SETD3	14.6371	-0.0802004	0.168706	0.489975	0.747871
ACTR10	12.8972	-0.108808	0.172918	0.358077	0.649157
AP2A1	13.9078	-0.0496016	0.163214	0.663213	0.856284
CLINT1	13.6224	-0.154423	0.180398	0.211521	0.491295
CDRT4	12.4252	-0.0347463	0.167685	0.758177	0.902332
LRTM1	12.0439	0.463139	0.294122	0.0157453	0.104532
TRAM2	14.6754	0.0251183	0.161704	0.826932	0.930467
NEO1	15.1883	-0.977187	0.216817	2.87896e-07	1.80552e-05
SARS1	14.0161	-0.205991	0.191854	0.111959	0.358039
CNIH1	12.0886	0.113382	0.185329	0.360047	0.650178
PUM1	13.0797	-0.254685	0.20911	0.0636383	0.257131
COQ10A	12.7871	-0.894763	0.224773	3.2039e-06	0.000124385
ATXN2	14.6865	-0.466762	0.225998	0.00424357	0.0408399
MED12	13.2006	-0.0406497	0.165771	0.719723	0.885466
HADHA	13.912	0.0918877	0.174872	0.461484	0.727681
TMEM109	15.4892	0.100982	0.169968	0.400036	0.683944
ZNF787	13.8925	-0.0266172	0.16191	0.814086	0.924481
OLFML2A	12.8714	-0.172824	0.186815	0.170196	0.439506
GSK3B	14.7594	-0.328654	0.215831	0.0239672	0.137607
FH	14.6529	-0.0433697	0.163243	0.702024	0.875932
ZNF721	10.5388	0.00987197	0.170725	0.934572	0.975223
STRN4	14.337	-0.187676	0.192516	0.142541	0.403668
AFG3L2	14.1619	0.0180472	0.159782	0.873934	0.952548
OBSCN	14.9177	-0.0140322	0.15725	0.900738	0.963296
TMEM165	13.7876	-0.289774	0.221223	0.0437581	0.203693
SNX3	12.275	0.183546	0.204977	0.168649	0.438216
KDM2A	13.2052	-0.0330606	0.16702	0.767503	0.906549
GSK3A	12.9213	0.00259571	0.166179	0.982996	0.99344
FTSJ3	12.9026	0.343321	0.263244	0.037875	0.186178
MZF1	13.2015	-0.585293	0.227175	0.000765557	0.0116198
SGCA	13.1494	0.118091	0.17831	0.337921	0.631059
GNA11	12.5186	0.215517	0.215048	0.121519	0.372453
HCK	13.2206	-0.195848	0.198787	0.130556	0.384007
WTAP	11.9832	0.0962924	0.182209	0.420524	0.699688
RHOBTB3	13.3859	0.0528867	0.165455	0.650165	0.849631
ZMIZ2	10.7248	0.00734815	0.16889	0.949746	0.97979
SLC66A2	13.4788	0.102684	0.175408	0.39211	0.679099
PLXNA1	11.8537	0.684847	0.298973	0.00241254	0.0270022
SCD	14.9484	-0.0879716	0.163887	0.450669	0.719913
P3H2	13.7633	0.340258	0.248558	0.037125	0.184077
TP53INP2	16.0775	0.529976	0.250422	0.00471437	0.0439623
ATP5PB	14.0032	0.190133	0.197879	0.155979	0.420121
CDK15	9.93919	-0.115865	0.189247	0.329465	0.624049
CAPN15	11.2689	-0.183133	0.208308	0.15276	0.416731
GRK2	12.6925	0.0124092	0.164866	0.914396	0.967065
CLIP3	12.4557	-0.0327322	0.166389	0.771494	0.908567
CCDC9	12.7663	-0.0344706	0.163146	0.761579	0.902973
HSPD1	15.676	0.0572465	0.163524	0.634869	0.83987
ATP6AP2	11.8941	-0.0101835	0.16728	0.926939	0.972434
P3H1	12.1399	-0.240028	0.217723	0.0816925	0.297523
GLUD1	12.9734	-0.0275333	0.166205	0.807135	0.921942
SPEG	13.3249	0.194269	0.205908	0.14964	0.41236
LMF2	12.009	0.00930156	0.16716	0.935725	0.975581
AFAP1L1	15.4603	0.212961	0.206266	0.120398	0.37134
KPNA1	13.8395	0.0283292	0.161305	0.8065	0.921829
PROSER3	13.2037	-0.255225	0.219786	0.0678397	0.267377
ZFP1	12.7058	-0.4624	0.228005	0.00468911	0.0438701
GOLGB1	12.736	0.171649	0.199379	0.190357	0.466323
EGFL7	11.8405	-0.174577	0.195396	0.167963	0.437501
CDK5RAP3	13.1545	-0.184016	0.191233	0.148436	0.410827
DYNC1LI2	11.2939	0.140439	0.194243	0.26502	0.556542
SRF	14.3616	0.0610091	0.168493	0.602415	0.822043
CDH2	9.14595	-0.166521	0.210984	0.185097	0.458949
BAGE5	12.111	-0.122974	0.182774	0.307105	0.600948
MYOF	12.3364	-0.0189503	0.168892	0.866994	0.948425
VCAN	10.1362	-0.182333	0.212261	0.154774	0.419401
SRRT	11.2331	0.216731	0.226283	0.122357	0.37274
ABCD1	13.5905	0.304626	0.237882	0.049812	0.218004
AKAP12	8.43244	-0.386034	0.280847	0.0205777	0.125089
ADD1	11.5257	0.125987	0.188022	0.31225	0.604686
ARFGEF1	13.4223	-0.451403	0.225825	0.00526099	0.0478097
CSNK2A3	13.605	0.00683683	0.159584	0.952818	0.98154
PDLIM5	12.9087	-0.0377398	0.165071	0.739376	0.895842
CCDC110	11.5174	-0.815183	0.232085	2.49946e-05	0.00075076
ZNF706	14.4058	-0.315456	0.21415	0.0290549	0.15747
TNK2	13.4491	-0.0539101	0.164283	0.636747	0.841094
RAB10	13.9661	-0.199717	0.197889	0.122179	0.37274
PRPSAP1	13.7458	-0.137431	0.179053	0.257266	0.545602
ATP5MK	12.7259	0.323872	0.245507	0.043392	0.203316
IRGC	12.4121	0.0159844	0.164877	0.941508	0.977261
CAB39	12.139	-0.120558	0.183106	0.315116	0.607748
CPSF7	13.0947	-0.15268	0.18669	0.214945	0.495189
SOX8	11.5362	0.143952	0.197362	0.253789	0.541044
IDH3A	15.709	-0.076673	0.171804	0.504252	0.758905
CECR2	12.5921	-0.118983	0.176545	0.32132	0.614947
HYDIN	12.1886	-0.0750007	0.169604	0.517562	0.767601
PLAGL1	11.2095	-0.037688	0.171349	0.738509	0.895405
UFM1	12.6619	0.0293866	0.167878	0.798302	0.918968
RXRG	14.2659	0.486745	0.259011	0.00881284	0.0694681
FAM234A	13.8322	-0.114066	0.172594	0.338861	0.631594
PDE4C	10.982	-0.0353733	0.173563	0.748991	0.899137
SUPT6H	14.0084	-0.0653781	0.163787	0.570913	0.802003
CACNB1	13.1044	0.381482	0.253796	0.0251337	0.142441
DCHS1	9.8598	-0.0734604	0.179817	0.522246	0.768974
TMEM258	13.4745	-0.145671	0.187588	0.23488	0.517801
ORM2	12.4008	-0.185158	0.195099	0.149429	0.41223
GBF1	13.8651	-0.0063989	0.160392	0.953911	0.982311
ADAR	10.8106	-0.0824638	0.176574	0.477413	0.738773
PPIAL4A	13.7536	0.367342	0.261951	0.0297111	0.159603
RAB28	11.6908	-0.603089	0.236822	0.000846787	0.0125197
PWWP3A	12.4928	0.0521114	0.169405	0.653275	0.851257
PHACTR3	12.3548	-0.198749	0.208073	0.137901	0.396673
TRAP1	13.4227	0.163437	0.191122	0.205947	0.483479
SEC23A	12.0626	0.202346	0.210804	0.139817	0.398969
TEAD3	12.9347	0.0733995	0.174142	0.532725	0.776175
NIPSNAP2	12.6885	-0.605875	0.226165	0.000566207	0.0092061
ARRB2	11.8582	-0.311719	0.23625	0.038226	0.186777
EIF4E2	12.6156	0.0681221	0.171163	0.561426	0.797427
ZFC3H1	13.1185	0.0154532	0.162442	0.893714	0.961297
RPS4Y1	10.9409	0.811886	0.324926	0.00125055	0.0169522
USP5	11.5288	0.167663	0.204955	0.199987	0.477089
ACADM	13.6052	-0.205681	0.203186	0.115052	0.362164
SIDT2	13.7431	-0.138002	0.179203	0.256585	0.544765
NDUFS5	12.3506	0.471921	0.278258	0.0129216	0.0918351
YIPF3	13.5784	-0.0863932	0.171149	0.456413	0.725258
MAGEF1	12.099	0.0996411	0.178707	0.409118	0.689964
IGF2BP1	11.3352	0.114687	0.186817	0.370925	0.659461
MLF2	12.6415	-0.0401228	0.165495	0.724084	0.88677
XPOT	12.9369	-0.00614968	0.162863	0.955679	0.98289
ATXN10	13.0498	0.0861501	0.176459	0.467958	0.731681
SPCS3	13.3497	-0.226641	0.19622	0.0874841	0.310879
KMT2E	12.7755	-0.335112	0.222493	0.0244256	0.139811
ETF1	12.3148	0.722092	0.308168	0.00194516	0.0234069
GXYLT2	10.3175	-0.0689728	0.179813	0.545729	0.784399
PRUNE2	14.0061	0.90222	0.296302	0.00022845	0.00446495
DCAF12	12.3098	-0.170692	0.190997	0.175836	0.447983
TMED2	12.8023	0.238494	0.230338	0.0976592	0.329808
PHF10	13.4825	0.0521644	0.165774	0.653321	0.851257
EDAR	11.5646	-0.445647	0.244034	0.00725003	0.060847
EML1	13.179	0.366141	0.257573	0.0299191	0.160327
ANKRD10	11.9036	-0.447318	0.243634	0.00715403	0.0602183
SUMO4	11.6218	0.0471826	0.17329	0.70736	0.877588
SHROOM3	13.1743	0.439526	0.274168	0.0162891	0.106853
PRPF19	13.2692	-0.244817	0.206533	0.0717944	0.277169
TMEM59	12.6918	0.223039	0.216023	0.109154	0.350953
ZC3H18	13.7352	-0.00466615	0.16048	0.965826	0.98657
ABHD2	13.5361	0.00238166	0.16559	0.984566	0.99422
SARAF	13.6178	0.0813839	0.169482	0.49287	0.749683
C19orf47	14.1984	0.0529993	0.161856	0.647102	0.848383
CHSY1	10.5766	0.043464	0.172456	0.706568	0.877415
ARGLU1	10.9966	-0.193333	0.210107	0.135333	0.393651
SARDH	12.5018	-0.123413	0.191123	0.301268	0.596437
SRSF11	10.2209	0.0793413	0.182099	0.499854	0.755674
NCBP1	11.39	0.221707	0.232342	0.116228	0.364458
GNB4	11.7907	-0.119156	0.1823	0.322798	0.61684
TXN2	12.386	-0.445556	0.23109	0.00631721	0.0550417
CMIP	13.9097	0.0768689	0.16881	0.509729	0.762923
IL1F10	10.4577	0.267794	0.249781	0.0783755	0.291964
SSU72	11.8881	0.249188	0.235401	0.0897043	0.315624
HACL1	12.6745	0.00821133	0.16609	0.943439	0.977387
ZNHIT1	10.8781	0.131164	0.197382	0.292239	0.587049
SYNC	13.1594	-0.0253744	0.164893	0.821887	0.928998
CDC27	12.3534	0.225626	0.22238	0.111705	0.357586
CRIP1	12.6151	0.000986233	0.172788	0.995854	0.998492
CSRP3	13.7262	0.0371144	0.163365	0.743201	0.897092
ARL15	13.3869	-0.253973	0.206186	0.0629894	0.255313
GALNT1	13.7719	-0.077896	0.170794	0.502681	0.757739
LZTS1	13.1686	0.164339	0.197854	0.206461	0.483891
SAR1A	12.8606	0.0361957	0.165439	0.790463	0.917323
DCLK3	16.4871	-0.986371	0.225739	6.1234e-07	3.29682e-05
CBX8	11.5451	-0.716719	0.230225	0.000121414	0.00282821
SF3B2	11.9473	-0.224144	0.208552	0.0943564	0.324547
[truncated: 6,048 more rows]

## Sheet: myocyte_vs_myofiber
	baseMean	log2FoldChange	lfcSE	stat	pvalue	padj
MB	18.7118	-2.91922	0.206824	-14.1145	3.09161e-45	2.03984e-41
FHL1	31.8972	-3.12363	0.241775	-12.9196	3.49133e-38	1.15179e-34
GCNT2	16.3857	-3.07539	0.252449	-12.1822	3.86628e-34	8.50323e-31
SLN	15.9805	-2.73062	0.229591	-11.8934	1.28085e-32	2.11276e-29
CKM	40.0902	-3.038	0.258198	-11.7661	5.83361e-32	7.69803e-29
PYGM	13.6285	-2.48958	0.221465	-11.2414	2.55248e-29	2.80688e-26
MTRNR2L10	463.092	-2.54048	0.228338	-11.1259	9.38086e-29	8.84213e-26
AK1	15.5656	-1.75638	0.158327	-11.0934	1.35088e-28	1.11414e-25
CA3	18.425	-3.39456	0.312799	-10.8522	1.94632e-27	1.42687e-24
HSPB8	15.0497	-2.55879	0.238998	-10.7063	9.5066e-27	6.27246e-24
ALDOA	78.8543	-2.1515	0.203648	-10.5648	4.34057e-26	2.60356e-23
TNNI2	70.398	-2.12973	0.206162	-10.3303	5.1377e-25	2.82488e-22
GNAS	47.8262	-1.58121	0.153286	-10.3154	6.00267e-25	3.04659e-22
ACTA1	340.273	-3.7683	0.36607	-10.2939	7.50612e-25	3.53753e-22
PFKM	15.9927	-1.8677	0.190734	-9.79221	1.21608e-22	5.34914e-20
TNFAIP8	35.1986	-1.66305	0.171595	-9.69169	3.27066e-22	1.34874e-19
TPM2	111.303	-1.89262	0.197929	-9.56207	1.1542e-21	4.47965e-19
ACTA2	41.1527	-1.63822	0.171789	-9.53619	1.48181e-21	5.43164e-19
COX5A	9.39115	-1.7644	0.189026	-9.33417	1.01789e-20	3.53475e-18
MYL9	71.0928	-1.48577	0.159828	-9.29608	1.45725e-20	4.80747e-18
TNNC2	53.4143	-1.86262	0.201052	-9.26436	1.96253e-20	6.16609e-18
MYH1	61.1447	-3.16563	0.346149	-9.14529	5.94689e-20	1.78353e-17
SYPL2	10.664	-2.02517	0.225916	-8.96425	3.12389e-19	8.96148e-17
MYOZ1	11.8203	-1.86862	0.212322	-8.80089	1.35733e-18	3.73152e-16
TCAP	13.8764	-2.16673	0.251617	-8.61125	7.22708e-18	1.90737e-15
MUSTN1	10.1964	-1.81839	0.220398	-8.25051	1.57726e-16	4.00261e-14
ACTN2	59.8213	-1.68744	0.205251	-8.22135	2.01227e-16	4.9174e-14
PSMD3	11.036	-1.50978	0.183902	-8.20969	2.21768e-16	5.22581e-14
NRAP	10.2735	-2.30623	0.282511	-8.16334	3.2589e-16	7.41455e-14
MYL1	63.3914	-1.41535	0.173957	-8.1362	4.07866e-16	8.97034e-14
MYBPC2	13.7212	-1.6636	0.205702	-8.08745	6.09286e-16	1.2968e-13
TNNT3	62.1236	-1.79203	0.226608	-7.90807	2.6141e-15	5.38995e-13
DES	33.1057	-1.11405	0.142108	-7.8395	4.52341e-15	9.04408e-13
TPM3	41.9001	-1.56742	0.200053	-7.83502	4.68764e-15	9.09678e-13
MYOZ2	8.74885	-1.65244	0.221517	-7.45965	8.67548e-14	1.63545e-11
ATP2A1	21.9285	-1.77508	0.238656	-7.43781	1.0237e-13	1.87621e-11
NEBL	12.0549	-1.27932	0.17452	-7.3305	2.29294e-13	4.08887e-11
BIN1	22.7978	-1.1624	0.158847	-7.31776	2.52136e-13	4.37788e-11
MYH2	11.3731	-2.59098	0.358347	-7.23037	4.81677e-13	8.14898e-11
TPM1	44.3361	-1.17325	0.162843	-7.20483	5.81184e-13	9.58663e-11
MYH8	35.3786	-2.37512	0.330796	-7.18001	6.9707e-13	1.12177e-10
CRYAB	24.7105	-1.62365	0.227865	-7.12547	1.03727e-12	1.6295e-10
GAL3ST2	25.0575	-1.10314	0.157238	-7.01573	2.28754e-12	3.51004e-10
PHLDA3	7.65245	-1.39889	0.199717	-7.00438	2.48082e-12	3.7201e-10
PFDN5	10.2204	-1.61983	0.23191	-6.98474	2.85386e-12	4.1844e-10
AK8	25.8848	-1.35397	0.199356	-6.79171	1.10809e-11	1.55557e-09
NEB	36.4217	-1.18186	0.173945	-6.79441	1.08755e-11	1.55557e-09
CASQ1	6.57661	-1.96902	0.291036	-6.76556	1.32798e-11	1.82542e-09
LMOD2	9.07821	-1.58113	0.234101	-6.75404	1.43783e-11	1.91076e-09
SMIM17	54.7674	-0.825882	0.122298	-6.75302	1.44799e-11	1.91076e-09
ACO2	10.6298	-1.18279	0.177529	-6.66253	2.69157e-11	3.48215e-09
NDRG2	6.99142	-1.43487	0.218057	-6.58024	4.69676e-11	5.95946e-09
MYBPC1	23.2541	-1.49338	0.227118	-6.57537	4.85322e-11	6.0418e-09
PXDN	13.4302	1.59803	0.245453	6.51052	7.48902e-11	9.15048e-09
ZNF723	29.4728	1.09599	0.169117	6.48069	9.13023e-11	1.0953e-08
FBN2	12.1373	1.83198	0.284305	6.44371	1.16589e-10	1.37367e-08
ERMARD	15.6024	1.59904	0.249639	6.4054	1.49975e-10	1.73603e-08
CCDC51	8.28482	-2.22413	0.34822	-6.38712	1.69034e-10	1.92291e-08
PDE4DIP	27.6384	-1.19629	0.18816	-6.35786	2.04587e-10	2.28791e-08
PDLIM3	18.8999	-1.3035	0.2052	-6.35236	2.1204e-10	2.33173e-08
ATP5MC3	9.90345	-1.17319	0.185547	-6.32286	2.56758e-10	2.7772e-08
PDHA1	8.45512	-1.24099	0.198067	-6.26549	3.71658e-10	3.95516e-08
TUBA4A	6.91444	-1.28559	0.206358	-6.2299	4.6673e-10	4.88807e-08
MYOT	14.9203	-1.28665	0.20739	-6.20402	5.50397e-10	5.67425e-08
MYL2	12.1714	-2.57947	0.422782	-6.10119	1.05282e-09	1.06869e-07
KLHL31	10.0249	-1.14328	0.18823	-6.07385	1.24877e-09	1.22976e-07
BIRC5	22.8762	1.02841	0.1693	6.0745	1.24377e-09	1.22976e-07
PTP4A2	14.194	-0.98302	0.162732	-6.04073	1.53422e-09	1.48865e-07
LRP1	11.4888	1.45205	0.243005	5.97537	2.29563e-09	2.19515e-07
MYLPF	51.9626	-1.08863	0.184049	-5.91488	3.32124e-09	3.1305e-07
ATP5F1A	14.9483	-1.12077	0.190739	-5.87594	4.20442e-09	3.90715e-07
CFL2	12.5764	-1.17938	0.20116	-5.8629	4.54846e-09	4.16816e-07
UGP2	9.43715	-1.10572	0.189191	-5.84444	5.08284e-09	4.59405e-07
ATP5PF	7.96055	-1.14091	0.196356	-5.81038	6.23303e-09	5.50486e-07
ACTN3	16.3116	-0.876908	0.150938	-5.80973	6.25742e-09	5.50486e-07
TNNC1	34.3999	-1.20596	0.20794	-5.79959	6.64769e-09	5.77125e-07
CAVIN4	8.76301	-1.10326	0.191266	-5.7682	8.01206e-09	6.8654e-07
PGAM2	7.00756	-1.56347	0.27135	-5.76182	8.32126e-09	7.03893e-07
TNNT1	58.8547	-1.45682	0.253241	-5.75268	8.78374e-09	7.33609e-07
LDB3	16.3776	-1.25377	0.219192	-5.71999	1.06529e-08	8.78601e-07
COL5A1	41.047	1.506	0.264086	5.70269	1.17928e-08	9.60604e-07
ALG2	10.143	1.36346	0.239509	5.69271	1.25039e-08	1.00611e-06
MYLK2	6.7858	-1.29026	0.226893	-5.68664	1.29562e-08	1.02994e-06
SRL	27.1739	-0.97528	0.172869	-5.64172	1.68358e-08	1.32241e-06
PPP2CA	10.7531	-0.933961	0.165696	-5.63659	1.73455e-08	1.34642e-06
ITM2B	21.1225	-0.932512	0.165601	-5.63109	1.79079e-08	1.37391e-06
PHAX	30.7358	0.995648	0.177774	5.60065	2.13555e-08	1.58319e-06
PSMC1	8.39593	-1.04923	0.187215	-5.60441	2.08968e-08	1.58319e-06
PPP1R27	4.96848	-1.39104	0.248315	-5.60193	2.11979e-08	1.58319e-06
CYGB	6.02905	-1.37829	0.246223	-5.59773	2.17181e-08	1.59217e-06
BASP1	31.9713	0.846942	0.152691	5.54677	2.90991e-08	2.08691e-06
SYPL1	6.66083	-1.19749	0.215854	-5.54771	2.8944e-08	2.08691e-06
MDH1	9.98452	-1.16115	0.209636	-5.53888	3.04417e-08	2.15972e-06
SLC7A2	4.44164	-1.33768	0.241906	-5.52975	3.20686e-08	2.25094e-06
TTYH3	30.5152	0.738447	0.133965	5.51225	3.54279e-08	2.46056e-06
CACNA1I	6.09631	-1.48257	0.269105	-5.50928	3.60312e-08	2.46793e-06
CAV1	6.50041	-1.34727	0.2446	-5.50805	3.6282e-08	2.46793e-06
HSPA9	12.5545	-0.859241	0.156164	-5.50216	3.75169e-08	2.52588e-06
BOC	14.0628	1.16627	0.212434	5.49005	4.0181e-08	2.67792e-06
ADAM2	4.17629	-1.36242	0.249703	-5.45617	4.86524e-08	3.21008e-06
BGN	12.6235	1.53655	0.282524	5.43865	5.36854e-08	3.50709e-06
ANAPC15	5.31366	-1.26211	0.232628	-5.42543	5.78163e-08	3.73992e-06
NBPF19	11.7945	1.19193	0.21979	5.42306	5.85875e-08	3.75301e-06
CALR	13.9153	1.21967	0.2252	5.41596	6.0961e-08	3.86751e-06
PALMD	5.87447	-1.18868	0.220008	-5.40291	6.5567e-08	4.12011e-06
SH3GLB1	9.3955	-1.06347	0.197422	-5.38679	7.17268e-08	4.46466e-06
ILRUN	8.79876	-1.07321	0.200217	-5.36025	8.31053e-08	5.07767e-06
COL3A1	239.622	1.70045	0.317233	5.36023	8.31144e-08	5.07767e-06
PRKACG	4.50222	-1.42857	0.266718	-5.35611	8.50305e-08	5.14708e-06
PCOLCE	13.0443	1.17455	0.219957	5.33992	9.29892e-08	5.57766e-06
DCLK3	7.77038	-1.18793	0.22266	-5.3352	9.54406e-08	5.67313e-06
COQ10A	6.67754	-1.40998	0.264466	-5.33144	9.74367e-08	5.74007e-06
C1S	7.97166	-1.14689	0.21558	-5.32001	1.03759e-07	6.05843e-06
P4HB	15.2617	1.03915	0.19556	5.3137	1.07423e-07	6.21736e-06
NR1D1	4.35341	-1.40014	0.263595	-5.31172	1.08596e-07	6.23057e-06
CLEC3B	7.66721	-1.49075	0.280817	-5.30862	1.10456e-07	6.28263e-06
UQCR11	6.72329	-1.23664	0.233186	-5.30324	1.13768e-07	6.41575e-06
FKBP10	15.7618	1.1818	0.22326	5.29338	1.20077e-07	6.71412e-06
NBPF12	18.5074	0.982154	0.18647	5.26709	1.38605e-07	7.68499e-06
SMPX	8.08909	-1.28387	0.244528	-5.2504	1.51768e-07	8.34472e-06
C4orf46	24.115	0.907337	0.173606	5.22642	1.7282e-07	9.42368e-06
COL1A1	321.939	1.71143	0.328493	5.20996	1.88884e-07	1.02152e-05
COL16A1	8.19769	1.31556	0.252866	5.20262	1.96498e-07	1.05406e-05
ZNF587	27.9336	1.00065	0.193237	5.17836	2.23841e-07	1.19105e-05
TIMP2	11.409	1.33848	0.259838	5.15121	2.58805e-07	1.36608e-05
NOTCH2NLA	11.9408	1.17043	0.228163	5.12981	2.90032e-07	1.51875e-05
SULF2	10.8938	1.14076	0.223798	5.09728	3.44569e-07	1.79013e-05
TMEM50B	24.3402	0.97532	0.192025	5.07913	3.79163e-07	1.95447e-05
COX5B	4.89456	-1.23556	0.243487	-5.07445	3.88609e-07	1.97234e-05
ANKRD1	11.2643	-1.54986	0.305415	-5.07461	3.88287e-07	1.97234e-05
PCBP1	21.267	-0.844586	0.167053	-5.05579	4.2861e-07	2.15876e-05
CMYA5	6.85988	-1.2707	0.252136	-5.03974	4.66153e-07	2.33006e-05
POSTN	90.7116	1.14173	0.226834	5.03334	4.82006e-07	2.39118e-05
PRKACA	13.899	-0.89503	0.17796	-5.02938	4.92069e-07	2.42289e-05
MYH7	33.9816	-1.80666	0.36128	-5.00071	5.71191e-07	2.79164e-05
LYRM2	62.5824	0.9331	0.187343	4.98069	6.33579e-07	3.07379e-05
MYL3	12.6491	-2.48439	0.500099	-4.9678	6.77173e-07	3.26131e-05
PPIB	8.44846	1.21131	0.244057	4.96323	6.93286e-07	3.31471e-05
HIPK4	5.06201	-1.25086	0.252235	-4.9591	7.08221e-07	3.36176e-05
ILF3	10.3841	1.20723	0.243867	4.95034	7.40831e-07	3.48865e-05
KIF1B	17.9963	-0.783571	0.158326	-4.94911	7.45529e-07	3.48865e-05
MMP2	13.3805	1.31991	0.267788	4.92893	8.26813e-07	3.82643e-05
ATP1B1	12.4266	-0.855562	0.1736	-4.92834	8.29311e-07	3.82643e-05
MAP3K20	5.45263	-1.18681	0.241742	-4.90942	9.13474e-07	4.18549e-05
TMOD1	6.95246	-1.02687	0.210212	-4.8849	1.03484e-06	4.70887e-05
SAP18	7.91519	-0.89496	0.183938	-4.86555	1.14137e-06	5.15147e-05
MYL12A	11.3674	-1.22725	0.252289	-4.86446	1.14772e-06	5.15147e-05
MDFI	7.14788	1.5261	0.315398	4.83864	1.30731e-06	5.82813e-05
ITIH4	5.32719	-1.26598	0.262616	-4.82066	1.43083e-06	6.33597e-05
MYPN	5.47951	-1.1871	0.246334	-4.81907	1.4423e-06	6.3442e-05
TOB1	7.2706	-0.974676	0.20237	-4.8163	1.46242e-06	6.39009e-05
PBXIP1	7.30122	-1.00732	0.209605	-4.80579	1.5414e-06	6.69091e-05
ITM2A	17.0786	-1.06819	0.222733	-4.79582	1.62013e-06	6.98669e-05
PRRC2B	15.3069	0.932132	0.194733	4.78672	1.69527e-06	7.26323e-05
TPPP3	7.03035	-1.19487	0.249784	-4.78362	1.72163e-06	7.32857e-05
HSPB6	6.46173	-1.14867	0.240676	-4.7727	1.81775e-06	7.68813e-05
APOBEC2	5.38011	-1.17465	0.246246	-4.77024	1.84005e-06	7.73289e-05
RTN2	4.96756	-1.28247	0.269167	-4.76459	1.89239e-06	7.90254e-05
NDUFS4	5.23944	-1.18478	0.249323	-4.752	2.01415e-06	8.3581e-05
ROBO1	6.79107	1.66256	0.350159	4.74803	2.05411e-06	8.47062e-05
ITM2C	16.6061	1.16595	0.245994	4.73975	2.13982e-06	8.76929e-05
CAV3	8.89378	-1.05519	0.223602	-4.71905	2.36953e-06	9.65071e-05
AEBP1	7.02219	1.40787	0.300008	4.69276	2.69541e-06	0.000107784
MYOM3	13.4747	-0.861209	0.183493	-4.69341	2.68694e-06	0.000107784
PAIP2	6.83697	-0.982038	0.209194	-4.69438	2.67418e-06	0.000107784
TMEM38A	6.57283	-1.06891	0.228274	-4.68255	2.83322e-06	0.000112612
TMEM132A	11.0055	1.09182	0.233321	4.67947	2.87624e-06	0.000113637
FBLN1	11.8186	1.03504	0.222358	4.65485	3.24223e-06	0.000127335
SEPTIN11	10.1868	1.20209	0.258442	4.65128	3.29888e-06	0.000128793
GOLGA3	7.88777	1.19441	0.257333	4.6415	3.45893e-06	0.000133868
MAFA	5.14929	-1.11358	0.239951	-4.64087	3.46944e-06	0.000133868
TMEM106C	79.9268	1.03874	0.225024	4.61614	3.9095e-06	0.00014997
SIK1	4.77775	-1.22385	0.266241	-4.59677	4.29087e-06	0.000163648
ENO3	21.1766	-0.993423	0.216351	-4.59172	4.39602e-06	0.000166695
GAS2	6.82677	1.28572	0.280718	4.58012	4.64715e-06	0.000175211
ZNF678	6.39912	1.43333	0.313075	4.57823	4.68929e-06	0.000175795
R3HDM4	18.3095	0.885672	0.193719	4.57195	4.83212e-06	0.000180126
NOTCH2	9.57123	1.14233	0.250112	4.56729	4.94067e-06	0.000183138
COL24A1	7.66691	-1.02271	0.22401	-4.56547	4.98382e-06	0.000183705
ZNF625	16.8611	0.936919	0.2056	4.55699	5.18915e-06	0.000190211
NFE2L1	18.6213	-0.619667	0.136102	-4.55295	5.28993e-06	0.000192834
CDH11	11.8056	1.0401	0.228984	4.54223	5.56629e-06	0.000201793
C10orf71	5.84203	-1.08992	0.240419	-4.53342	5.80353e-06	0.00020731
MEF2D	8.47206	-0.971781	0.21432	-4.53426	5.78052e-06	0.00020731
ZNF506	30.0997	0.929135	0.204967	4.53309	5.81274e-06	0.00020731
FXR1	6.97054	-0.948406	0.209684	-4.52303	6.09606e-06	0.000216246
FAT4	6.77748	1.29742	0.287779	4.50837	6.53271e-06	0.000230496
CDH2	8.07362	1.29138	0.287822	4.48673	7.23261e-06	0.000253834
PRDX2	11.0624	-0.816091	0.182493	-4.4719	7.75266e-06	0.000270646
UBE2B	5.4042	-1.06325	0.237964	-4.46812	7.89091e-06	0.000272613
HMCN2	4.4321	-1.22701	0.274616	-4.4681	7.89165e-06	0.000272613
KLHL41	10.029	-0.877956	0.196618	-4.46528	7.99636e-06	0.000274792
SOD1	5.85056	-0.980715	0.219834	-4.46115	8.15205e-06	0.00027869
FBXO15	13.0811	1.29094	0.289705	4.45604	8.34892e-06	0.000283949
HSPB1	14.7678	-1.1443	0.256938	-4.45359	8.44463e-06	0.000285732
SHISA4	4.58116	-1.24839	0.280498	-4.45061	8.56274e-06	0.00028825
PKDCC	9.03752	1.13063	0.254551	4.44164	8.92742e-06	0.000299
HHATL	5.81986	-1.02292	0.230402	-4.43971	9.00793e-06	0.000300173
SLMAP	5.26689	-1.09442	0.247013	-4.43063	9.39593e-06	0.000311529
PTBP1	32.9656	0.969316	0.218975	4.42661	9.57245e-06	0.000315795
ADAMTS2	6.54357	-0.941217	0.212839	-4.4222	9.77006e-06	0.000320711
LRP6	7.81627	-0.888445	0.201309	-4.41334	1.01788e-05	0.000332473
ASB5	6.24994	-1.11152	0.252101	-4.40901	1.03842e-05	0.000337513
LTBP3	8.39559	1.0155	0.230462	4.40637	1.05116e-05	0.000339979
AKAP1	5.31377	-1.04987	0.238341	-4.40491	1.05829e-05	0.000340614
RCN3	5.11379	1.51577	0.344293	4.40255	1.06987e-05	0.000342669
BAG3	7.66493	-0.995352	0.226252	-4.3993	1.08599e-05	0.000346152
CKAP4	7.97706	0.994401	0.226214	4.39584	1.10346e-05	0.00035003
ZC2HC1C	6.14001	-1.3224	0.300986	-4.39357	1.11504e-05	0.000352012
B4GALT1	6.87948	-0.931679	0.212139	-4.39182	1.12404e-05	0.000353162
SERPINF1	16.8417	-0.807442	0.184069	-4.38663	1.15121e-05	0.000359985
COL6A3	28.666	1.59745	0.365252	4.37356	1.22237e-05	0.000380435
LMCD1	8.44701	-0.912271	0.208863	-4.3678	1.25505e-05	0.000388771
SSPN	4.48571	-1.09929	0.252108	-4.3604	1.29824e-05	0.00040027
TRDN	8.29798	-0.867032	0.19923	-4.35192	1.34948e-05	0.000414133
NDUFS2	7.91006	-0.862922	0.19843	-4.34876	1.3691e-05	0.00041821
ZNF714	16.0544	0.810909	0.186727	4.34275	1.40708e-05	0.000427831
CASQ2	16.8806	-0.966733	0.222832	-4.33839	1.43533e-05	0.000434417
QKI	26.3979	-0.728354	0.168077	-4.33346	1.46785e-05	0.000442232
SEC61A1	8.90802	1.0799	0.249275	4.33217	1.47644e-05	0.000442797
RNF41	4.975	-1.20472	0.278432	-4.3268	1.51294e-05	0.000451691
WIPI1	7.2231	-0.916672	0.212299	-4.31783	1.57568e-05	0.000466203
GGTLC1	7.72367	-0.896676	0.207641	-4.3184	1.57165e-05	0.000466203
HSPB2	5.19206	-1.0663	0.248095	-4.29794	1.72392e-05	0.000507788
RASL10A	14.3644	0.905628	0.21078	4.29655	1.73478e-05	0.000508713
ZFHX4	10.0457	0.918294	0.214009	4.29091	1.7794e-05	0.000519491
MMP14	22.2431	0.886621	0.207536	4.27213	1.93618e-05	0.000562771
KCNA10	6.81093	-1.05027	0.246623	-4.25862	2.05692e-05	0.000595243
AKIRIN2	7.75932	-0.897823	0.211019	-4.25471	2.09318e-05	0.000603091
RPS3	11.2674	0.870392	0.204706	4.25191	2.1196e-05	0.000608048
MAGED1	15.7985	0.765817	0.180465	4.24359	2.19977e-05	0.000628315
HSPB7	5.99453	-1.17999	0.278496	-4.23702	2.26505e-05	0.000644173
COL4A2	14.5654	1.18253	0.279229	4.23498	2.28573e-05	0.000647264
PLEKHD1	10.0017	-0.869979	0.205685	-4.22967	2.34032e-05	0.000659891
LOXL1	9.15649	-1.09024	0.257909	-4.22724	2.36579e-05	0.000664233
SPTAN1	18.1575	0.961975	0.227724	4.22431	2.39677e-05	0.000667252
PDLIM7	29.5793	0.760139	0.17992	4.22487	2.39074e-05	0.000667252
PLEC	33.9673	-0.507432	0.120274	-4.21899	2.45404e-05	0.000680325
MBNL2	7.51212	-0.966298	0.229226	-4.21548	2.49245e-05	0.000688082
DMPK	14.7743	-0.736282	0.175191	-4.20273	2.63711e-05	0.000724984
LUC7L3	7.23183	1.17344	0.27998	4.19115	2.77547e-05	0.000759857
C1orf21	5.19947	-0.990747	0.236667	-4.18625	2.83604e-05	0.00077323
RAB2A	8.73763	-0.855819	0.204607	-4.18275	2.88003e-05	0.000778788
ANKRD23	4.23302	-1.19318	0.285245	-4.183	2.87686e-05	0.000778788
MEF2C	14.1543	-0.843624	0.202079	-4.17472	2.98347e-05	0.000803466
FAM156A	5.58103	1.4001	0.335606	4.17184	3.02149e-05	0.000810398
AMPD1	5.54068	-1.01898	0.244363	-4.16995	3.04667e-05	0.000810562
ZFP36L2	5.67219	-0.91488	0.219359	-4.17071	3.03657e-05	0.000810562
ERGIC1	7.07173	-0.811612	0.194841	-4.16552	3.10644e-05	0.000823144
FLNC	27.1655	-0.834762	0.200643	-4.16043	3.17656e-05	0.000838357
NR3C1	6.1302	-1.14739	0.276993	-4.14231	3.43823e-05	0.000903802
CALM2	7.66137	-0.855372	0.207196	-4.12832	3.65422e-05	0.000956769
AZIN1	7.9383	-0.846568	0.205302	-4.12353	3.73104e-05	0.00096919
LAMA4	10.1641	0.980337	0.237739	4.12359	3.73019e-05	0.00096919
NPIPA1	21.0068	0.72676	0.176617	4.1149	3.87342e-05	0.00100223
CLEC11A	5.64077	1.28974	0.313726	4.11103	3.93901e-05	0.00101522
LYAR	4.22236	-1.51141	0.368523	-4.10128	4.1087e-05	0.00105074
CNBP	7.78957	-0.841059	0.205046	-4.10181	4.0993e-05	0.00105074
SUSD1	4.1013	-1.71818	0.4193	-4.09773	4.17218e-05	0.00106286
S100A4	6.71437	-1.02224	0.249988	-4.08917	4.32914e-05	0.0010986
MYF6	5.39507	-0.952858	0.233242	-4.08528	4.40231e-05	0.00111289
VCP	12.9687	-0.717812	0.175884	-4.08116	4.48113e-05	0.00112849
SORBS1	5.20247	-0.95906	0.235769	-4.0678	4.746e-05	0.00119065
ARHGEF40	10.608	1.06154	0.2611	4.06562	4.79043e-05	0.00119725
CRIP2	8.48673	-0.867586	0.213491	-4.0638	4.82797e-05	0.00119755
FIBIN	9.9236	1.136	0.27951	4.06425	4.81871e-05	0.00119755
ATP2B1	9.05598	1.07458	0.26472	4.05932	4.92154e-05	0.00121494
FSCN1	8.3713	0.901674	0.222159	4.05869	4.93489e-05	0.00121494
SKIL	8.00107	1.04896	0.259402	4.04375	5.26036e-05	0.00128548
FKBP4	4.77336	-0.999427	0.24715	-4.0438	5.25917e-05	0.00128548
BAG1	4.00285	-1.14047	0.282111	-4.04264	5.28524e-05	0.00128679
KLHL24	5.36401	-0.910904	0.225756	-4.03491	5.46243e-05	0.00132504
ZNF654	3.94033	-1.13216	0.280848	-4.03123	5.54856e-05	0.001341
ATP2A3	7.82145	-1.02442	0.254379	-4.02715	5.64575e-05	0.00135951
PROS1	4.52471	-1.00559	0.249853	-4.02474	5.70383e-05	0.0013685
PMP22	6.19669	-0.993124	0.246989	-4.02093	5.797e-05	0.00138412
CHCHD10	5.41362	-1.01194	0.251703	-4.02036	5.81087e-05	0.00138412
DBN1	12.4561	0.880971	0.219454	4.01437	5.96039e-05	0.00141463
HNRNPA1	30.5059	0.590492	0.147502	4.00328	6.24716e-05	0.00147737
TTC3	10.6593	0.904753	0.226091	4.00172	6.28833e-05	0.0014818
DYRK1B	4.4596	-1.0731	0.268374	-3.99852	6.37403e-05	0.00149665
MSI2	6.79169	-0.949695	0.237962	-3.99095	6.58101e-05	0.00153135
PACSIN3	6.45402	-0.975514	0.244445	-3.99073	6.58712e-05	0.00153135
MXRA8	9.87559	0.865537	0.216896	3.99057	6.59145e-05	0.00153135
TASOR2	32.5715	0.616903	0.154707	3.98757	6.67539e-05	0.00154541
MEPCE	42.9157	0.562631	0.141331	3.98096	6.86373e-05	0.00158346
HNRNPL	11.6803	0.889092	0.223558	3.97701	6.97865e-05	0.00160436
CAPNS1	14.2442	-0.643526	0.162104	-3.96983	7.19226e-05	0.00164773
CSDE1	15.7444	-0.613605	0.155237	-3.95269	7.72762e-05	0.00176425
THBS2	7.3286	1.21136	0.307061	3.94502	7.97926e-05	0.00180918
DNAAF8	6.02287	-0.947276	0.240108	-3.94522	7.97284e-05	0.00180918
COL12A1	18.9958	1.02368	0.259921	3.93843	8.20182e-05	0.00185327
ATP5MF	6.2588	-0.892364	0.227191	-3.92782	8.57199e-05	0.00193031
PALLD	17.0194	0.892159	0.228325	3.9074	9.32945e-05	0.00209373
JPH1	5.55705	-1.03922	0.266018	-3.90657	9.36138e-05	0.00209377
CASZ1	6.77953	-0.908559	0.232898	-3.9011	9.57568e-05	0.00213447
TUBA4B	4.11826	-1.0026	0.257267	-3.89712	9.73434e-05	0.00216253
NCF1	4.01544	-1.52809	0.392336	-3.89486	9.8256e-05	0.0021682
EMILIN1	7.88781	0.926569	0.237868	3.89531	9.80726e-05	0.0021682
GAA	4.93523	-0.916321	0.235525	-3.89055	0.000100016	0.00219967
S100A6	12.1465	-0.975477	0.251561	-3.87769	0.000105452	0.00231154
NBPF14	14.6984	0.691969	0.178554	3.8754	0.000106449	0.00232566
NBPF15	20.727	0.595134	0.153757	3.87062	0.000108561	0.00236397
TNC	30.0156	1.48604	0.384463	3.86523	0.000110987	0.00240211
DYNLL2	11.3302	-0.664158	0.171835	-3.86509	0.000111047	0.00240211
SLC25A5	7.64135	-0.749216	0.193881	-3.86431	0.000111404	0.00240211
EIF3F	8.08044	-0.764584	0.19796	-3.86231	0.000112321	0.00241398
AKAP12	7.30933	0.974335	0.252472	3.85918	0.000113767	0.00243712
SLC25A46	4.69678	-0.92551	0.240268	-3.85198	0.000117165	0.00250181
PTP4A1	7.50481	-0.779788	0.202643	-3.84809	0.000119043	0.00253369
ACTC1	279.006	-0.903032	0.234886	-3.84456	0.000120771	0.0025622
AP1S2	4.27743	-1.01677	0.265383	-3.83133	0.000127453	0.00267814
TPI1	19.6054	-0.70193	0.183196	-3.83158	0.000127323	0.00267814
ZBTB16	4.07538	-1.08052	0.282021	-3.83136	0.000127438	0.00267814
MAP2K3	6.81562	-0.900678	0.235599	-3.82293	0.000131876	0.00276227
ODC1	6.10853	-0.869417	0.227495	-3.82169	0.000132538	0.00276736
FZD1	4.58923	1.37187	0.359331	3.81783	0.000134632	0.00280222
PGK1	11.4217	-0.75179	0.197216	-3.81201	0.000137841	0.00285999
TTN	74.9192	-0.812006	0.213795	-3.79806	0.000145834	0.00301634
LCE3B	5.46257	-0.969629	0.255351	-3.79724	0.000146314	0.00301682
UQCRFS1	5.09634	-0.938787	0.247745	-3.78933	0.000151056	0.00309525
MKNK2	7.30588	-0.847097	0.223543	-3.78942	0.000151002	0.00309525
ATAD1	5.89684	-0.879371	0.233071	-3.77298	0.000161312	0.00329293
GOLGA8A	44.7319	-0.461978	0.122464	-3.77237	0.000161702	0.00329293
PRKCSH	7.36608	0.969869	0.257372	3.76835	0.000164328	0.00332588
COL4A1	12.9807	0.804215	0.213405	3.76849	0.000164236	0.00332588
TUBA1C	55.0175	0.900809	0.239822	3.75615	0.000172545	0.0034815
RNASEK	4.08288	-0.984176	0.262174	-3.75391	0.0001741	0.00350218
MMP16	7.44901	0.923283	0.246038	3.75261	0.000175006	0.00350969
OLFML2B	7.26403	1.05692	0.281915	3.74908	0.000177488	0.00354408
BLOC1S1	6.28326	-0.927092	0.247314	-3.74864	0.000177795	0.00354408
RHOT1	4.23554	-0.98542	0.263009	-3.74672	0.000179165	0.00356063
TCEAL7	10.4067	-0.761118	0.203764	-3.73529	0.000187497	0.00371502
TXLNA	6.29894	1.00901	0.270658	3.728	0.000193008	0.00380139
HSP90B1	12.8952	0.850959	0.228224	3.72862	0.000192534	0.00380139
PLA2G4E	4.10596	-1.01031	0.271142	-3.72614	0.000194437	0.00381814
MEGF8	19.83	0.646931	0.1744	3.70946	0.000207704	0.00406657
TMEM119	8.31658	0.987299	0.266356	3.70669	0.000209986	0.00409908
ITGB1	14.6363	0.759417	0.205049	3.70359	0.000212571	0.00413729
HSP90AB1	24.7825	-0.5487	0.14836	-3.69844	0.000216929	0.0042097
IGSF3	3.99579	-1.01715	0.275127	-3.69701	0.000218153	0.00422104
NIPSNAP2	6.09852	-0.851745	0.231061	-3.68623	0.000227598	0.00439092
RAB12	6.81399	-0.775665	0.210877	-3.67828	0.000234809	0.00451332
CKMT2	5.48535	-1.04889	0.285199	-3.67774	0.000235311	0.00451332
ADI1	4.06706	-0.998689	0.271847	-3.67372	0.000239043	0.0045716
NSD2	7.50233	0.950793	0.258918	3.67218	0.000240488	0.0045757
PRELID3B	30.1712	0.552894	0.15057	3.67202	0.000240644	0.0045757
PPP2R5A	4.46829	-0.949871	0.258815	-3.67007	0.000242482	0.00459741
CHPF	12.0117	0.69061	0.18829	3.6678	0.000244648	0.00462518
TXNDC5	7.99874	0.875773	0.239461	3.65727	0.000254914	0.00480549
CACNA1S	13.7745	-0.672695	0.18429	-3.6502	0.000262033	0.00492563
SLC25A19	17.6099	1.06267	0.292233	3.63638	0.000276494	0.00518269
COL6A1	39.9756	1.07904	0.296807	3.63548	0.000277461	0.00518608
ATP5F1B	13.7153	-0.66728	0.183621	-3.63401	0.000279051	0.00519895
PSMB7	10.0771	-0.68062	0.187324	-3.63339	0.000279725	0.00519895
SLIT3	6.83897	-0.84601	0.233004	-3.63088	0.000282453	0.00522024
PARVB	4.70589	-0.890597	0.245284	-3.63088	0.000282451	0.00522024
MARCHF8	4.74132	-0.907078	0.25036	-3.6231	0.000291092	0.00536487
NCK1	25.8024	-0.643224	0.17771	-3.61952	0.000295155	0.00542461
SELENOF	6.71506	-0.745156	0.206264	-3.61263	0.00030311	0.00553999
DUSP6	5.68315	-0.873772	0.241866	-3.61263	0.000303113	0.00553999
HMGA2	7.0303	1.20489	0.333939	3.60811	0.000308441	0.0056066
SIGIRR	39.06	-0.541804	0.150164	-3.60809	0.000308456	0.0056066
PADI2	6.96576	-0.980888	0.272048	-3.60557	0.000311472	0.00564585
FABP1	29.8477	0.698604	0.193917	3.60259	0.000315061	0.00569527
DUX5	27.1972	0.509566	0.141535	3.60028	0.000317874	0.00571735
VASH2	12.9876	0.831683	0.231013	3.60016	0.000318015	0.00571735
DDB1	11.3917	-0.651343	0.181046	-3.59766	0.000321087	0.00575689
PPP1CB	12.1344	-0.66135	0.184017	-3.59396	0.00032569	0.00582359
UBE2V2	8.76405	-0.681147	0.190025	-3.5845	0.000337721	0.00602238
SAMD4B	4.30558	-0.904046	0.252347	-3.58255	0.000340262	0.00605134
DCHS1	7.26662	0.968692	0.270554	3.5804	0.000343071	0.00605235
TXNIP	8.12801	-0.704578	0.196765	-3.58081	0.000342535	0.00605235
SRSF11	6.49817	0.961672	0.26859	3.58045	0.000342999	0.00605235
RTRAF	5.71059	-0.780906	0.21825	-3.57804	0.000346176	0.00609085
DCX	9.37707	0.773179	0.21648	3.5716	0.000354802	0.00622602
ZNF383	16.0888	0.65478	0.183414	3.56995	0.000357044	0.00624875
GAS1	6.07586	0.999613	0.280865	3.55905	0.0003722	0.00649677
PRMT1	10.0081	-0.735811	0.2069	-3.55635	0.00037604	0.00654647
TRIP4	4.44287	-1.0008	0.281623	-3.55369	0.000379872	0.00659577
KLHL7	3.99055	-0.95884	0.27058	-3.54365	0.000394635	0.00683413
SCX	8.14134	1.01252	0.285879	3.54179	0.000397423	0.0068644
NEO1	7.41093	-0.862229	0.243497	-3.54102	0.000398579	0.00686638
CTHRC1	15.1334	0.925542	0.26144	3.54017	0.000399871	0.0068707
IL1F10	6.86728	1.01345	0.286647	3.53553	0.00040696	0.00697435
HOXA3	4.73811	1.18903	0.336947	3.52883	0.000417396	0.00713465
SMYD1	8.86621	-0.70898	0.201032	-3.5267	0.00042078	0.00717393
FLNA	10.3871	0.825366	0.234447	3.52049	0.000430757	0.00732509
RNF181	11.9233	0.69248	0.196749	3.51961	0.000432179	0.00733038
SRSF2	7.92849	0.88026	0.250332	3.51638	0.00043748	0.00740126
NDUFB10	5.21371	-0.920949	0.262102	-3.51371	0.000441892	0.00745679
CYCS	9.98852	-0.650315	0.185193	-3.51156	0.000445488	0.00749828
SFRP2	11.6802	0.858369	0.24467	3.50827	0.000451034	0.00757232
CARM1	7.16832	-0.717148	0.204613	-3.5049	0.000456787	0.00764945
TXN2	5.56943	-0.829598	0.237274	-3.49637	0.000471629	0.00787799
GALNT2	8.11042	0.833265	0.238685	3.49106	0.000481102	0.00801594
RAN	10.1585	-0.630141	0.180578	-3.48958	0.000483778	0.00804022
HSF2	4.42458	-0.957307	0.274467	-3.48788	0.000486874	0.00807134
PLOD1	8.95598	0.82294	0.235993	3.48714	0.000488208	0.00807317
UQCRB	5.03054	-0.861459	0.247249	-3.48418	0.000493649	0.00814274
ADAMTS9	11.4754	0.895599	0.257115	3.48327	0.000495334	0.00815016
RPL4	18.2532	-0.512491	0.147246	-3.48051	0.000500467	0.00819376
B2M	15.4815	-0.643216	0.184803	-3.48055	0.000500389	0.00819376
CBWD2	8.43885	0.956706	0.276166	3.46424	0.000531732	0.00868408
EIF5A	11.8489	-0.621547	0.179454	-3.46354	0.000533108	0.00868506
CYC1	6.36535	-0.840623	0.242798	-3.46223	0.000535717	0.00870607
RAI14	5.5893	1.10014	0.31793	3.46031	0.000539554	0.00874687
LMO7	5.30295	-0.944053	0.273084	-3.45701	0.000546208	0.00883304
VAPA	6.34828	-0.799327	0.231334	-3.45529	0.000549703	0.00886783
IDH3B	8.08408	-0.722175	0.209113	-3.45351	0.000553347	0.00890483
IDH3A	5.54888	-0.851859	0.247423	-3.44292	0.000575465	0.00923824
HNRNPA3	18.3301	-0.607972	0.176716	-3.44039	0.000580883	0.00930259
DLD	7.23321	-0.752608	0.218948	-3.43738	0.000587376	0.0093838
MSL2	4.63856	-0.918044	0.267603	-3.43062	0.000602207	0.00959749
NGFR	6.49473	0.944692	0.275536	3.42856	0.000606784	0.00964713
POLR2I	4.49147	-0.984704	0.287786	-3.42165	0.000622415	0.00987186
SULF1	13.5705	1.16867	0.341724	3.41994	0.00062636	0.00991061
SARS1	6.27167	-0.777308	0.227383	-3.4185	0.000629664	0.00993904
SOX4	13.318	0.70818	0.207234	3.4173	0.000632456	0.00995929
NPIPB6	19.6997	0.753434	0.221204	3.40606	0.000659073	0.0103537
GANAB	9.7907	0.74862	0.219878	3.40471	0.000662344	0.0103558
ZNF417	14.0662	0.671338	0.197171	3.40485	0.000662001	0.0103558
ATG4B	6.5975	1.00549	0.295471	3.40301	0.000666487	0.0103959
TUSC2	46.0236	0.573359	0.168555	3.40162	0.000669868	0.010424
RPS9	9.95534	0.717123	0.210953	3.39945	0.000675213	0.0104825
NYAP1	11.0881	0.717364	0.211195	3.39669	0.000682063	0.0105562
CSRP3	5.55977	-0.918785	0.270529	-3.39625	0.000683159	0.0105562
RPS3A	22.3642	0.566515	0.166907	3.3942	0.000688286	0.0105909
RASL11B	5.35543	0.968597	0.285379	3.39407	0.000688619	0.0105909
PLXNA1	6.04201	0.995653	0.293578	3.39144	0.000695259	0.0106682
MYH7B	6.81265	-1.03871	0.307339	-3.37967	0.000725717	0.0111097
PLXNB2	8.68702	0.804293	0.238496	3.37236	0.000745276	0.0113827
PRICKLE1	5.41315	1.05808	0.314265	3.36685	0.000760312	0.0115855
THEM5	23.4624	0.553406	0.164406	3.36609	0.000762426	0.011591
FECH	4.26938	-0.889281	0.264536	-3.36166	0.000774752	0.0117513
TUBB6	13.8465	0.662933	0.197659	3.35393	0.000796732	0.012057
NUP37	4.52799	-0.862301	0.257286	-3.35153	0.000803663	0.012134
NET1	8.74947	0.801302	0.23943	3.34671	0.000817759	0.0123187
NRSN2	5.93436	1.15238	0.344423	3.34583	0.000820354	0.0123296
ATP1B2	4.17743	-1.03779	0.310311	-3.34435	0.000824763	0.0123677
KCNA7	4.09122	-0.992301	0.296796	-3.34338	0.000827654	0.0123829
POLR2A	7.75572	0.810975	0.242751	3.34077	0.000835474	0.0124307
MYL6B	29.2579	-0.632829	0.189381	-3.34156	0.000833101	0.0124307
ARL6IP5	6.06612	-0.740099	0.221558	-3.34043	0.000836501	0.0124307
GEMIN6	4.95216	-0.829762	0.249105	-3.33097	0.000865441	0.0128319
CCT6A	9.27644	-0.61999	0.18663	-3.32203	0.000893642	0.0131613
GPR87	9.50627	-0.660281	0.198711	-3.32282	0.000891126	0.0131613
PHOSPHO1	4.52629	-0.955409	0.287584	-3.32219	0.000893141	0.0131613
TINAGL1	4.75117	1.04369	0.314273	3.32096	0.000897089	0.0131826
DNAJA2	5.64281	-0.842597	0.253792	-3.32003	0.000900092	0.0131973
NCL	11.8694	0.672106	0.20295	3.31169	0.000927354	0.0135669
ASPN	6.03572	1.022	0.309518	3.30191	0.000960291	0.0139867
RAB7A	7.00799	-0.67047	0.203034	-3.30226	0.000959077	0.0139867
DNAJA1	6.41121	-0.730764	0.221494	-3.29926	0.00096941	0.0140885
HIPK3	7.69514	0.767216	0.232631	3.29799	0.000973784	0.0141209
BNIP3	4.59259	-0.89282	0.27078	-3.29722	0.000976465	0.0141288
XIRP2	8.84843	-1.07486	0.326057	-3.29654	0.000978841	0.0141321
PTMS	17.499	0.613244	0.186101	3.29523	0.000983415	0.0141672
WWTR1	7.07832	0.988333	0.300461	3.28938	0.00100407	0.0144332
PABPC1	10.8451	0.642931	0.195707	3.28517	0.00101921	0.0146191
SYNCRIP	11.3117	-0.583677	0.177816	-3.28248	0.00102897	0.014727
CUL1	5.15373	-0.811338	0.24722	-3.28185	0.0010313	0.0147272
MEX3A	6.97571	0.840163	0.256049	3.28126	0.00103345	0.0147272
LRRC8C	4.52037	-0.853926	0.260651	-3.27613	0.00105241	0.014965
TOM1	6.45901	-0.784445	0.241067	-3.25405	0.00113771	0.0161086
ATP2A2	27.0309	-0.64813	0.199166	-3.25422	0.00113704	0.0161086
DEFA1B	3.99261	-0.858967	0.264531	-3.24713	0.00116576	0.0164704
TEAD2	7.79585	0.907252	0.279949	3.24078	0.00119205	0.0168059
GLUL	5.89818	-0.759169	0.234481	-3.23765	0.00120519	0.0169548
H1-5	5.66904	0.949241	0.293646	3.23261	0.00122666	0.0172202
TMSB4X	16.2692	0.873724	0.270427	3.2309	0.00123401	0.0172608
ISLR	5.99858	0.932292	0.288581	3.23061	0.00123526	0.0172608
NUMA1	9.53133	0.789311	0.244406	3.22951	0.00124002	0.0172608
SMARCA4	6.69737	0.867557	0.268633	3.22953	0.00123995	0.0172608
TAF1D	6.95856	0.935347	0.290004	3.22529	0.00125846	0.0174807
RPS6KA3	5.55641	-0.777793	0.241227	-3.22431	0.00126275	0.0175035
SCHIP1	5.91077	-0.811995	0.2519	-3.22348	0.00126642	0.0175174
ALPG	4.05445	-1.06555	0.330785	-3.22129	0.00127616	0.0176153
TSC22D3	5.44009	-0.759619	0.235876	-3.22042	0.00128003	0.0176318
KREMEN2	16.2543	0.911985	0.283785	3.21365	0.00131061	0.0180154
POLR1D	4.30459	-0.890816	0.277603	-3.20896	0.00133215	0.0182735
NPIPB3	11.3943	0.739823	0.231163	3.20044	0.0013722	0.0187838
PABPC3	4.53221	-0.834282	0.261349	-3.19221	0.00141188	0.0192869
HOXD4	7.86628	0.773875	0.243299	3.18076	0.00146891	0.0200245
EGFR	3.97642	1.19342	0.375705	3.17647	0.00149079	0.0201909
PLXDC2	5.27238	0.993925	0.312858	3.17692	0.00148849	0.0201909
TMPRSS9	4.05074	-0.882033	0.277721	-3.17597	0.00149336	0.0201909
WIF1	5.09607	1.10905	0.349125	3.17666	0.00148979	0.0201909
RPL38	13.7397	-0.587468	0.185233	-3.17151	0.0015165	0.0204619
USP22	10.1636	0.740769	0.233842	3.16782	0.00153585	0.0206807
ANKRD65	7.2015	-0.706146	0.223194	-3.16383	0.00155709	0.020924
TRIM72	7.52413	-0.667674	0.211117	-3.16258	0.00156378	0.0209712
ACE	4.62129	-0.849875	0.26884	-3.16126	0.00157088	0.0210237
TIMP3	7.72502	-0.725239	0.229582	-3.15895	0.00158338	0.0211109
H4C12	6.43287	0.910922	0.288369	3.15887	0.0015838	0.0211109
PLD3	13.3675	0.5619	0.178741	3.14365	0.00166854	0.0221956
DLGAP4	10.8669	-0.544915	0.173532	-3.14013	0.00168872	0.0224188
SRRT	6.34619	0.877667	0.279592	3.1391	0.00169468	0.0224529
SDHB	4.8061	-0.833859	0.26569	-3.13847	0.00169833	0.0224561
RAB18	7.39431	-0.694849	0.221458	-3.1376	0.00170334	0.0224773
NOTCH3	5.77017	0.930363	0.29694	3.13317	0.00172928	0.022774
OTUD1	4.07063	-0.932029	0.297909	-3.12857	0.0017566	0.0230877
UQCRC1	8.38169	-0.656764	0.210457	-3.12065	0.00180452	0.0236704
ETFA	7.35527	-0.687484	0.220445	-3.11862	0.00181699	0.0237867
UBE2Z	39.9167	0.520175	0.167088	3.11318	0.00185085	0.024182
SYNM	5.48311	-0.776324	0.249574	-3.11059	0.00186711	0.0242504
CAP2	9.84091	-0.585814	0.188281	-3.11138	0.00186218	0.0242504
GFAP	7.13722	0.781155	0.251119	3.1107	0.00186646	0.0242504
CD9	7.46454	-0.798695	0.257458	-3.10224	0.00192065	0.0248967
ZIC1	5.581	0.903993	0.291611	3.09999	0.00193525	0.0250368
GRK6	4.4504	-1.21787	0.393112	-3.09802	0.0019482	0.025155
RANBP2	9.74121	0.852958	0.275454	3.09655	0.00195784	0.0252301
PRRX1	12.3019	0.685891	0.221805	3.09232	0.001986	0.0255432
HUWE1	7.05627	-0.640723	0.207529	-3.08739	0.00201924	0.0258699
MYOM1	10.2763	-0.681952	0.22085	-3.08785	0.00201613	0.0258699
PALM2AKAP2	3.99604	-0.838622	0.271914	-3.08415	0.00204137	0.0260796
PRKAG3	4.46972	-0.934476	0.303074	-3.08333	0.00204699	0.0260796
RPL14	8.21306	-0.608211	0.197263	-3.08326	0.00204748	0.0260796
ACBD5	4.02522	-0.875909	0.284281	-3.08114	0.0020621	0.0262153
COMMD3	4.63987	-0.777547	0.252593	-3.07827	0.00208208	0.0264184
DCUN1D4	5.60137	-0.699489	0.227286	-3.07758	0.00208692	0.026429
ZBTB20	4.9412	-0.755809	0.245858	-3.07417	0.0021109	0.0266815
PNPLA2	6.92071	-0.687101	0.223727	-3.07115	0.00213233	0.0269008
CYP4Z1	7.01969	0.847856	0.276144	3.07034	0.00213819	0.0269232
CDC42	9.55495	-0.559416	0.182405	-3.0669	0.00216292	0.0271827
FADS3	5.8786	-0.727564	0.238024	-3.05668	0.00223804	0.0280734
RPS28	14.8789	0.570923	0.186872	3.05516	0.0022494	0.0281623
SDC3	8.19572	0.677344	0.222073	3.0501	0.00228765	0.028587
SP7	80.2784	0.929395	0.304941	3.04779	0.00230531	0.0287532
SETD3	5.51298	-0.733231	0.240986	-3.04263	0.00234524	0.029196
RPL13	12.593	0.655746	0.215952	3.03654	0.0023931	0.0297357
RPL10A	13.387	0.658921	0.21727	3.03273	0.00242352	0.0300571
S100A13	4.77355	-0.753001	0.248414	-3.03123	0.00243556	0.0301497
CNN2	8.01917	0.83947	0.277028	3.03027	0.00244334	0.0301895
SMDT1	5.88296	-0.689215	0.22749	-3.02965	0.00244835	0.0301948
PDCD4	52.8093	0.491255	0.162245	3.02786	0.00246293	0.030318
SSC5D	4.7177	1.0398	0.343591	3.02628	0.00247583	0.03042
MYH4	11.2296	-1.50423	0.497258	-3.02504	0.00248597	0.0304878
CHD3	7.46052	0.728078	0.241225	3.01825	0.00254238	0.0311217
RAB10	6.30248	-0.719161	0.238683	-3.01304	0.00258643	0.0316023
FITM1	6.79561	-0.655241	0.217597	-3.01126	0.00260169	0.0317301
REEP5	6.01259	-0.700696	0.233022	-3.007	0.0026384	0.032092
CYLD	4.65751	-0.74605	0.24813	-3.00669	0.00264109	0.032092
GLIPR2	6.26024	0.886862	0.295137	3.00492	0.00265651	0.03222
EXOSC6	10.1906	0.75781	0.252316	3.00342	0.00266965	0.0323137
DOCK5	3.9785	-0.817308	0.272171	-3.00292	0.00267404	0.0323137
SLF2	7.82064	0.752664	0.250723	3.00198	0.0026823	0.0323544
ADAM12	5.02815	1.01413	0.337934	3.00096	0.00269129	0.0324036
NDUFS3	7.47149	-0.741874	0.247384	-2.99887	0.0027098	0.032567
FCGRT	6.52883	0.871082	0.290536	2.99819	0.00271585	0.0325804
MAP2K1	7.35142	-0.633309	0.211272	-2.9976	0.00272119	0.0325851
SLC3A2	6.55313	0.829018	0.276651	2.99662	0.00272987	0.0326299
ADPRH	5.99811	-0.660401	0.220436	-2.99589	0.00273647	0.0326496
EPS15L1	5.54749	-0.695018	0.232411	-2.99047	0.00278545	0.033174
CERCAM	4.08836	1.04261	0.349005	2.98737	0.00281392	0.0334527
SLC25A11	5.66537	-0.704876	0.23648	-2.9807	0.00287586	0.0341276
GYS1	12.1633	-0.610947	0.205128	-2.97837	0.00289787	0.034327
LPL	4.21215	-0.788567	0.265196	-2.97353	0.00294398	0.0347251
TMEM214	6.80137	0.759632	0.255401	2.97427	0.00293684	0.0347251
TMEM182	5.50857	-0.752871	0.25322	-2.97319	0.00294727	0.0347251
DFFA	4.8506	-0.737971	0.248369	-2.97127	0.00296568	0.0348798
COX7A2L	4.62557	-0.77497	0.260942	-2.96989	0.00297902	0.0349744
ROCK2	4.20374	-0.865377	0.291812	-2.96553	0.00302162	0.0354115
LMOD3	7.20132	-0.719949	0.243193	-2.9604	0.00307243	0.035943
ARF5	6.28926	-0.686529	0.232113	-2.95773	0.00309911	0.036191
ANKRD13A	4.92708	-0.707977	0.239621	-2.95456	0.00313112	0.0365002
COX7B	5.18164	-0.78469	0.265909	-2.95097	0.00316775	0.0368621
ATP8A1	4.41493	-0.796192	0.270019	-2.94865	0.00319162	0.0370745
UBE2G1	6.53821	-0.670921	0.227605	-2.94774	0.00320101	0.0371183
HELLS	4.01806	1.18646	0.402697	2.94629	0.00321613	0.0371629
TUBB	6.5808	0.892362	0.302846	2.94659	0.00321298	0.0371629
PTK7	6.18355	0.931315	0.316364	2.94381	0.003242	0.0373964
CCDC8	15.1525	0.509093	0.173094	2.94113	0.00327016	0.0376344
WDR74	4.94457	-0.734161	0.24965	-2.94076	0.00327404	0.0376344
XIRP1	6.48535	-0.744941	0.253587	-2.93761	0.00330748	0.0379526
RNF11	8.2596	-0.57869	0.197146	-2.93534	0.00333184	0.0381658
CHD4	13.0439	0.615604	0.209835	2.93375	0.00334896	0.0382619
KCNJ11	5.94949	0.787505	0.268481	2.93319	0.00335497	0.0382619
HNRNPH1	15.2519	0.521511	0.177811	2.93295	0.00335763	0.0382619
PSMD8	5.99815	-0.658415	0.224597	-2.93154	0.00337286	0.0383304
CASP2	8.83506	0.688716	0.234951	2.93132	0.00337526	0.0383304
JPH4	33.2986	-0.343997	0.117412	-2.92984	0.00339141	0.0384477
GPM6B	4.02433	-0.776121	0.265053	-2.92818	0.00340955	0.0385164
KLHL13	4.83559	-0.748313	0.255599	-2.92768	0.00341499	0.0385164
DTNA	4.99491	-0.734465	0.250782	-2.92869	0.0034039	0.0385164
CHSY1	6.47672	0.835014	0.285323	2.92656	0.00342737	0.0385901
LAIR1	8.26078	0.764873	0.261535	2.92455	0.00344951	0.0387732
LMNB2	5.3147	0.835858	0.285993	2.92265	0.00347062	0.0389442
H4C5	7.37387	0.739521	0.253221	2.92046	0.00349515	0.0390864
TNFRSF21	4.14873	-0.783454	0.268236	-2.92077	0.0034917	0.0390864
PDCD6	7.2246	0.742058	0.254289	2.91816	0.003521	0.0392615
TRPM5	4.42106	-0.726163	0.248855	-2.91801	0.0035227	0.0392615
WNT10A	8.13245	0.720682	0.247125	2.91627	0.00354245	0.0393001
PPP1R15A	4.28734	1.06536	0.365303	2.91637	0.00354127	0.0393001
FES	4.27063	-0.811732	0.278359	-2.91613	0.00354404	0.0393001
PCIF1	4.83479	-0.745739	0.255846	-2.91479	0.00355924	0.0393291
TAGLN	7.54267	0.691606	0.237312	2.91433	0.00356453	0.0393291
PPP1R3C	4.78696	-0.779963	0.267587	-2.91481	0.00355911	0.0393291
HNRNPA0	6.06259	0.784098	0.269297	2.91165	0.00359529	0.0396022
TMEM19	4.87977	-0.718737	0.246897	-2.91108	0.00360181	0.039608
MYOM2	6.76848	-0.700179	0.240607	-2.91005	0.00361367	0.0396722
LDHA	9.92694	-0.656392	0.225705	-2.90819	0.00363527	0.039843
ZHX3	11.2625	0.624381	0.214844	2.90621	0.00365835	0.0400295
PSMA2	5.32142	-0.725405	0.249698	-2.90513	0.00367098	0.0400349
KHSRP	7.13516	0.768135	0.264388	2.90533	0.00366862	0.0400349
EXOC6	4.69103	-0.770909	0.265559	-2.90297	0.00369645	0.040241
SKP1	12.1879	-0.549568	0.189344	-2.90249	0.00370208	0.040241
TMED9	6.02803	0.81672	0.281693	2.89932	0.00373971	0.0405832
HS6ST1	4.32032	0.961964	0.332492	2.89319	0.00381345	0.041096
EIF4G2	30.0296	-0.363645	0.125675	-2.89353	0.00380937	0.041096
NFIX	17.7612	-0.443725	0.153354	-2.89347	0.0038101	0.041096
LTBP1	6.27871	0.760702	0.262952	2.89293	0.00381668	0.041096
ANXA11	7.37669	-0.595486	0.20585	-2.89281	0.0038181	0.041096
SMU1	4.17689	-0.802231	0.277613	-2.88975	0.00385551	0.0413765
TMEM95	4.15801	-0.764291	0.264492	-2.88965	0.00385671	0.0413765
OGN	22.6466	0.55376	0.191974	2.88455	0.00391972	0.0419843
RPL27A	12.8977	0.579685	0.201069	2.88301	0.00393895	0.0421219
ABCB6	4.23133	-0.805865	0.279981	-2.87828	0.00399848	0.0426892
MIER1	4.41197	-0.763437	0.265552	-2.87491	0.00404146	0.0430784
MRFAP1	12.0307	-0.474449	0.165412	-2.86828	0.00412708	0.0439201
FIZ1	20.2792	0.483018	0.168435	2.86769	0.00413485	0.0439319
FN1	67.0025	0.610898	0.213164	2.86586	0.00415883	0.0441157
RRP1	4.65079	-0.719459	0.251664	-2.85881	0.00425237	0.0450355
COL11A1	13.3152	0.910503	0.319308	2.85149	0.00435153	0.0460119
HACD1	4.01998	-0.883212	0.310101	-2.84814	0.00439755	0.0463896
VLDLR	4.18366	-0.805577	0.28287	-2.84787	0.00440132	0.0463896
OR10G3	4.74526	-0.732162	0.257224	-2.8464	0.00442165	0.0465296
POPDC3	4.06447	-0.818773	0.287823	-2.84472	0.00444511	0.046702
NACC2	4.38148	-0.754795	0.266225	-2.83518	0.00457999	0.0480426
WNT8A	5.17295	0.883786	0.311793	2.83453	0.00458935	0.0480644
B3GALT2	4.34135	-0.75934	0.267986	-2.83351	0.00460402	0.0480993
MARCKSL1	13.7264	0.578445	0.204161	2.83328	0.00460727	0.0480993
PTPRS	6.15883	0.731441	0.258443	2.83018	0.00465213	0.0484239
MORF4L1	15.0327	-0.444919	0.157264	-2.82911	0.00466772	0.0484239
ADORA2B	4.04302	-0.81574	0.288246	-2.83001	0.0046546	0.0484239
PRMT8	109.465	-0.411334	0.145373	-2.82951	0.00466197	0.0484239
SEC31A	9.33388	0.609578	0.216174	2.81985	0.0048046	0.0495325
FZD4	7.29694	-0.571422	0.202611	-2.82029	0.004798	0.0495325
VCAN	7.09877	0.718083	0.254643	2.81996	0.00480296	0.0495325
CALD1	6.33984	0.814218	0.28863	2.82097	0.00478783	0.0495325
TOR1AIP2	6.65223	0.775759	0.275425	2.81659	0.00485362	0.0499597
ILK	4.70049	-0.697119	0.247784	-2.81341	0.00490188	0.0503779
PIAS4	4.12472	-0.762633	0.271289	-2.81114	0.00493658	0.0506557
SLC36A1	7.20808	0.767438	0.273188	2.8092	0.00496653	0.0508838
HNRNPCL3	20.7414	0.487612	0.173682	2.80749	0.0049929	0.0509956
SPON2	11.8094	0.970253	0.345545	2.80789	0.00498676	0.0509956
DNAJA4	5.93461	-0.699681	0.249662	-2.80251	0.00507062	0.0516296
SLC6A6	5.47337	-0.677905	0.241863	-2.80284	0.0050654	0.0516296
ZMYND11	5.6292	-0.669301	0.239154	-2.79862	0.00513223	0.0521763
MED7	4.27303	-0.759716	0.271611	-2.79707	0.00515684	0.0523322
SEMA6A	8.90469	0.804617	0.287707	2.79666	0.00516342	0.0523322
POLR2E	19.6044	0.475095	0.170018	2.79438	0.00519986	0.0526206
CIRBP	15.7296	0.532348	0.190709	2.79141	0.0052479	0.0530255
MCL1	11.5311	-0.493934	0.177053	-2.78976	0.00527476	0.0532154
ZNF669	11.8647	0.630312	0.226065	2.78819	0.00530032	0.0533102
POLR2J2	5.47283	0.849082	0.304491	2.78853	0.00529476	0.0533102
PTN	8.23082	-0.564498	0.202823	-2.7832	0.00538253	0.0540436
TGFB2	11.4931	0.91414	0.328499	2.78278	0.00538962	0.0540436
WIPF1	4.63498	-0.732803	0.263758	-2.77831	0.00546417	0.054708
FNDC5	13.9808	0.792808	0.285603	2.77591	0.00550479	0.0550313
BACH1	7.46718	0.689089	0.248386	2.77427	0.00553256	0.0552251
ZNF706	6.52791	-0.626224	0.225915	-2.77195	0.00557223	0.0553698
GEMIN4	3.97796	-0.772648	0.278726	-2.77207	0.00557011	0.0553698
RNF146	4.99407	-0.655443	0.236417	-2.77241	0.00556436	0.0553698
EVC	4.398	0.945468	0.341372	2.76961	0.00561237	0.0556848
GXYLT2	6.5016	0.703172	0.254146	2.7668	0.00566088	0.0560818
FLRT2	6.07429	0.813632	0.294254	2.76507	0.00569105	0.0562962
HYAL2	4.30737	0.985146	0.356857	2.76062	0.00576915	0.0569833
NDUFB9	5.4279	-0.680511	0.247049	-2.75456	0.00587716	0.0578768
TMA7	17.6975	0.43561	0.158138	2.75462	0.00587606	0.0578768
PPP1R12B	6.74312	-0.621178	0.225649	-2.75285	0.00590786	0.0580925
VSIG8	7.37694	0.744222	0.270451	2.75178	0.00592723	0.0581963
DHRS2	4.86811	0.93704	0.340977	2.74811	0.00599408	0.0587651
TGFBR2	5.20876	-0.679609	0.247554	-2.7453	0.00604564	0.0591827
PPP2R5B	4.17339	-0.761483	0.27747	-2.74438	0.00606262	0.059261
IGKC	4.77076	-0.703003	0.256371	-2.74213	0.00610417	0.0594976
FTH1	23.1166	-0.454532	0.165761	-2.7421	0.00610486	0.0594976
NID1	8.46751	0.627529	0.228891	2.74161	0.00611391	0.0594979
AKAP6	6.54956	-0.627653	0.228987	-2.74101	0.00612515	0.0595195
STAT5B	5.71261	-0.634572	0.231791	-2.73769	0.00618721	0.0600341
MACF1	18.7804	0.507464	0.185487	2.73585	0.00622201	0.0602832
MPZL1	11.139	0.533932	0.195197	2.73535	0.00623137	0.0602853
SHOC2	5.32214	-0.696738	0.255143	-2.73078	0.0063185	0.0610387
LENG8	21.6323	0.487654	0.178842	2.72674	0.00639639	0.0617008
SEC14L1	7.08896	-0.543554	0.19946	-2.72513	0.00642756	0.0618208
ABTB2	5.34562	-0.701911	0.257559	-2.72524	0.00642551	0.0618208
NUCB1	9.52265	0.552902	0.202991	2.72377	0.00645408	0.0619855
ADPRHL1	6.71159	-0.708694	0.260348	-2.72211	0.00648671	0.062028
LPAR2	9.86243	0.655302	0.240693	2.72256	0.0064778	0.062028
NR1D2	5.31652	-0.732282	0.268974	-2.7225	0.00647905	0.062028
RPS13	9.3459	-0.530151	0.194827	-2.72114	0.00650581	0.0621206
DLG1	5.235	0.826752	0.304077	2.71889	0.0065501	0.0624531
MVP	4.77599	-0.679369	0.249941	-2.71811	0.00656551	0.0625097
RTKN	4.85107	0.851927	0.313643	2.71623	0.00660293	0.0627754
USP13	5.14544	-0.745434	0.274521	-2.7154	0.00661956	0.0628429
BBLN	7.51893	0.650336	0.239767	2.71237	0.00668044	0.0633298
RBBP7	6.18347	-0.613248	0.226201	-2.71107	0.0067066	0.0634866
LRRC27	9.09665	0.626846	0.231811	2.70412	0.00684848	0.0647368
PURB	5.38044	-0.682529	0.252551	-2.70254	0.00688129	0.0649538
CD276	7.06744	0.647409	0.239662	2.70134	0.00690603	0.0650014
EMC10	9.48766	0.600655	0.222342	2.7015	0.00690277	0.0650014
USP9X	9.17015	-0.502616	0.186111	-2.70062	0.00692098	0.0650493
H1-2	5.8215	0.767782	0.284566	2.69808	0.00697404	0.0654548
HMGN1	10.858	0.578546	0.214801	2.69341	0.0070726	0.0662855
CACNA1G	4.62979	0.859525	0.319327	2.69168	0.00710935	0.0663588
OLR1	5.29304	-0.687295	0.255405	-2.691	0.00712378	0.0663588
UBA52	9.42991	-0.483974	0.179844	-2.69108	0.00712206	0.0663588
CSRP2	5.49997	0.78252	0.290668	2.69214	0.00709941	0.0663588
CLSTN1	4.1547	0.945435	0.351374	2.69068	0.0071307	0.0663588
SDHD	4.10382	-0.731554	0.272054	-2.689	0.00716662	0.0665991
HOXD3	5.2401	0.771555	0.287211	2.68636	0.00722342	0.0669384
KIAA1143	5.88568	-0.636602	0.236958	-2.68655	0.00721935	0.0669384
SKI	14.6752	-0.424355	0.158061	-2.68475	0.00725844	0.0670745
EBNA1BP2	5.68223	-0.644716	0.240124	-2.68493	0.00725445	0.0670745
UBB	8.1513	-0.53319	0.198992	-2.67945	0.00737426	0.0679557
MAFK	4.18514	-0.69382	0.258942	-2.67945	0.00737439	0.0679557
EEF1A2	6.26336	-0.731309	0.273152	-2.6773	0.00742182	0.0682973
PHKG1	4.65588	-0.808757	0.302192	-2.6763	0.00744398	0.0684059
FBXO6	4.34016	-0.716928	0.268381	-2.67131	0.00755566	0.068985
KRT28	22.846	0.446666	0.167114	2.67283	0.00752145	0.068985
DDX17	44.9816	0.442265	0.165555	2.6714	0.00755348	0.068985
RNF122	5.75443	-0.628123	0.235096	-2.67177	0.00754526	0.068985
ETV3	40.2886	0.357847	0.133967	2.67115	0.00755928	0.068985
DUSP10	5.46316	-0.655816	0.245681	-2.66938	0.00759914	0.0692529
POM121C	7.99739	0.635583	0.238292	2.66724	0.00764769	0.0695992
TFRC	5.04945	-0.735559	0.275837	-2.66664	0.00766135	0.0696276
UQCRC2	11.9955	-0.501032	0.188173	-2.66262	0.00775354	0.0702753
IGHMBP2	10.32	-0.508044	0.190807	-2.6626	0.00775393	0.0702753
PTGES3	6.84787	-0.590025	0.221718	-2.66115	0.00778749	0.0704826
SYAP1	4.52995	-0.652524	0.24536	-2.65946	0.00782666	0.070734
ZFAND5	7.36926	-0.639003	0.240315	-2.65903	0.0078367	0.070734
CCNG1	5.02024	-0.696281	0.262137	-2.65618	0.00790324	0.0712371
PKM	21.2657	-0.552732	0.208535	-2.65055	0.00803608	0.0723356
OXR1	4.82181	-0.72019	0.271784	-2.64986	0.00805254	0.0723851
MED19	8.84141	0.645558	0.243868	2.64716	0.00811719	0.0728669
AKR1E2	7.79104	0.660232	0.249467	2.64657	0.00813129	0.0728943
CCND2	15.1613	0.562939	0.213346	2.63862	0.0083244	0.0745243
ANPEP	4.71442	-0.667409	0.253164	-2.63627	0.00838228	0.0748393
PRPF19	6.43246	-0.653269	0.247778	-2.63651	0.00837643	0.0748393
CLOCK	4.23889	-0.671825	0.254905	-2.63559	0.00839923	0.0748556
TEAD1	6.9455	-0.573218	0.217542	-2.63498	0.00841421	0.0748556
KIDINS220	4.82966	0.845618	0.320939	2.63482	0.00841814	0.0748556
PUF60	9.85945	0.559911	0.21259	2.63375	0.00844465	0.0749903
PICALM	4.24803	0.973609	0.369822	2.63264	0.00847237	0.0751353
ZC3H7A	5.36114	0.783054	0.297794	2.62951	0.00855072	0.0757284
OR56A4	8.04523	0.588817	0.224059	2.62796	0.00858996	0.0759739
MEDAG	4.69653	-0.755478	0.287582	-2.627	0.00861423	0.0760866
MRC2	8.53303	0.613052	0.233431	2.62627	0.00863265	0.0761474
MAPT	4.85216	-0.702942	0.268122	-2.62173	0.00874854	0.0770666
ADAR	6.86928	0.647753	0.247265	2.61967	0.00880147	0.0774295
FOS	3.97913	-0.748051	0.285731	-2.61802	0.00884407	0.0777006
KIR3DL1	9.89464	0.57079	0.218444	2.61298	0.00897554	0.078684
ADCY2	4.10437	-0.7473	0.286013	-2.61282	0.00897985	0.078684
BAZ2A	4.30278	0.899938	0.344639	2.61125	0.00902122	0.0789416
SLC7A11	4.39824	0.850267	0.325766	2.61006	0.00905266	0.0791119
CCDC102A	5.50986	-0.626998	0.240522	-2.60682	0.00913861	0.0797393
VAPB	6.25516	-0.610861	0.234446	-2.60555	0.0091728	0.0797393
RAPGEF1	10.0542	-0.480969	0.184559	-2.60605	0.00915943	0.0797393
PLEKHA4	11.118	0.558141	0.21421	2.60558	0.00917178	0.0797393
FBXL3	5.45893	-0.626079	0.24061	-2.60205	0.0092669	0.0801247
RPL12	7.58188	0.616621	0.236913	2.60273	0.00924834	0.0801247
AP5S1	4.30535	-0.659367	0.253271	-2.6034	0.00923039	0.0801247
HBA1	4.09803	-0.707698	0.271988	-2.60195	0.00926951	0.0801247
EGR1	17.9083	-0.508378	0.195406	-2.60164	0.00927785	0.0801247
PRKAB2	6.39854	-0.562135	0.216216	-2.59988	0.0093257	0.0804186
VAC14	4.49309	-0.655363	0.252112	-2.59949	0.00933626	0.0804186
JUP	5.48444	-0.692172	0.266346	-2.59877	0.00935577	0.0804816
RAP1A	6.08443	-0.581481	0.223855	-2.59758	0.00938841	0.0806572
DPEP1	4.78966	-0.660618	0.254423	-2.59654	0.00941686	0.0807964
USP2	4.25763	-0.69748	0.269021	-2.59266	0.00952381	0.0815021
NPM1	12.0726	0.497501	0.191858	2.59306	0.00951248	0.0815021
FAM20C	9.28481	0.555094	0.214164	2.59191	0.00954447	0.0815731
MAPK1	8.10115	-0.542862	0.209489	-2.59136	0.00955962	0.0815968
PPP3R1	9.57109	-0.563164	0.217407	-2.59036	0.00958747	0.0816234
BICD1	11.7774	0.582864	0.22499	2.59063	0.00958009	0.0816234
NES	27.3158	0.521319	0.201343	2.58921	0.00961967	0.081792
ARMCX3	9.70485	0.531147	0.20534	2.58667	0.00969091	0.0822917
SLC35E2B	5.71109	0.685153	0.264974	2.58574	0.00971701	0.0824072
SOCS4	4.15205	-0.681379	0.263683	-2.58409	0.00976376	0.0826974
ERV3-1	4.18505	1.00449	0.38894	2.58264	0.00980482	0.0829387
ANO6	4.06213	-0.700872	0.27201	-2.57664	0.00997656	0.0841756
MRPS35	4.90844	-0.659287	0.25587	-2.57665	0.0099763	0.0841756
MGST3	4.37347	-0.670051	0.260175	-2.57539	0.0100128	0.0843731
SIK2	4.91119	-0.659991	0.25637	-2.57437	0.0100423	0.0845137
CTDSP1	5.22041	-0.716355	0.278492	-2.57226	0.0101037	0.0849226
NEXN	9.98067	-0.561637	0.218406	-2.57152	0.0101252	0.0849953
KIF5A	4.29388	-0.691711	0.269054	-2.5709	0.0101435	0.0850404
SOD2	4.46904	-0.686691	0.267279	-2.5692	0.0101934	0.0853507
GNAI2	10.226	-0.520362	0.202701	-2.56714	0.0102542	0.0857502
IQCN	4.73576	0.904512	0.352414	2.56662	0.0102696	0.0857709
NDUFB3	4.90474	-0.688679	0.268606	-2.5639	0.0103502	0.0863349
PCMTD1	6.03339	-0.653506	0.255077	-2.562	0.0104073	0.0867009
NKTR	7.18088	0.658982	0.257692	2.55725	0.0105504	0.0877828
SLC20A2	5.15764	-0.647285	0.253167	-2.55675	0.0105655	0.0877972
ZNF574	14.1048	0.479892	0.187812	2.55517	0.0106137	0.0880471
MRAS	4.48886	0.842552	0.329781	2.55489	0.0106222	0.0880471
TRIB2	6.57266	0.647192	0.253426	2.55377	0.0106564	0.0882191
EMC3	4.26406	-0.739749	0.289791	-2.5527	0.0106892	0.0883798
PLAT	6.73773	0.646092	0.253253	2.55117	0.0107361	0.0886569
TXLNB	7.01742	-0.577791	0.226729	-2.54837	0.0108227	0.0892606
DIO1	10.4569	-0.786832	0.308937	-2.5469	0.0108685	0.0895263
KRT12	6.53127	-0.590949	0.232418	-2.54261	0.0110027	0.0904119
TMOD4	4.35117	-0.738188	0.290329	-2.54259	0.0110034	0.0904119
RRBP1	6.6279	0.651084	0.256254	2.54078	0.0110605	0.090768
PIGR	4.27837	-0.708212	0.279046	-2.53798	0.0111495	0.0913847
MZT2B	15.2703	0.419366	0.165367	2.53597	0.0112138	0.091797
TGFBRAP1	4.32421	-0.645516	0.254874	-2.53269	0.0113191	0.0924157
CPEB4	5.06155	-0.651611	0.257319	-2.53231	0.0113314	0.0924157
SLK	4.48117	-0.646363	0.255226	-2.53251	0.0113248	0.0924157
MAT2A	9.92514	-0.497798	0.196626	-2.5317	0.0113513	0.0924637
CNRIP1	4.18014	-0.701288	0.277106	-2.53076	0.0113816	0.0925967
SIDT2	5.65458	-0.580114	0.229271	-2.53026	0.0113979	0.0926147
SSR1	6.19137	0.654228	0.258695	2.52895	0.0114403	0.0927314
MAP1B	4.99031	0.767586	0.303503	2.52909	0.0114358	0.0927314
GJA1	6.1766	0.645435	0.2553	2.52814	0.0114668	0.0928318
GPBP1L1	3.95104	0.933063	0.369237	2.527	0.011504	0.0930189
LRRN1	16.7585	0.613606	0.2429	2.52617	0.0115314	0.0931265
DYSF	8.17427	-0.514794	0.20407	-2.52264	0.0116478	0.0939517
SEMA6B	7.77838	0.758994	0.301214	2.51978	0.0117428	0.0946023
IP6K2	5.95681	0.759621	0.301587	2.51875	0.0117774	0.0947646
SPRR2E	4.13689	-0.694648	0.275854	-2.51817	0.0117965	0.0948033
GRAMD4	4.25687	-0.676223	0.268656	-2.51706	0.0118339	0.0949877
RNF38	4.60076	-0.690736	0.274482	-2.51651	0.0118524	0.0950208
MAPKBP1	24.7056	0.385064	0.153188	2.51367	0.0119481	0.0956722
MEIS1	5.4568	0.717996	0.285708	2.51304	0.0119696	0.0957274
PKD1	11.7021	0.568745	0.226542	2.51055	0.0120542	0.0961934
GOLGB1	6.3984	0.653788	0.260424	2.51047	0.012057	0.0961934
COLQ	4.57743	-0.680299	0.27105	-2.50986	0.0120778	0.0962433
RGL1	6.53501	-0.619345	0.246917	-2.50832	0.0121308	0.0964329
NNMT	4.98768	-0.699529	0.278881	-2.50834	0.0121298	0.0964329
RBM24	10.4584	-0.611523	0.243877	-2.50751	0.0121585	0.0965363
LZTS2	6.83425	0.67468	0.269373	2.50463	0.012258	0.0971003
KCNAB3	10.7133	0.523688	0.20909	2.5046	0.012259	0.0971003
CHRNB1	10.2114	0.588118	0.23525	2.49997	0.0124203	0.0982605
RPL10L	8.29386	0.576651	0.230739	2.49915	0.0124491	0.09837
FHL3	5.01089	-0.670344	0.268447	-2.49712	0.0125205	0.0988163
ZNF768	10.9716	0.498686	0.199838	2.49546	0.0125795	0.0991174
TNNI1	7.85099	-0.493736	0.197908	-2.49477	0.0126037	0.0991174
VPS52	4.60922	-0.64052	0.256717	-2.49505	0.0125941	0.0991174
EIF3B	6.22742	0.646399	0.259298	2.49288	0.0126711	0.0995287
ATRX	13.6142	0.448911	0.180304	2.48975	0.0127834	0.0999349
GGNBP2	7.7477	-0.507001	0.203622	-2.48991	0.0127774	0.0999349
CPO	5.70164	0.777402	0.312194	2.49013	0.0127697	0.0999349
CAMK2A	4.61829	-0.669252	0.268704	-2.49066	0.0127505	0.0999349
AGBL1	4.22977	-0.70837	0.284572	-2.48925	0.0128014	0.0999571
ZNF334	7.34763	0.639074	0.256886	2.48778	0.0128545	0.100253
GNL3	5.29263	0.719613	0.289484	2.48585	0.0129242	0.100441
LRRC17	7.94394	0.635958	0.255809	2.48606	0.0129165	0.100441
GSK3B	6.44737	-0.541223	0.217684	-2.48628	0.0129087	0.100441
CCN1	4.92746	0.846289	0.340553	2.48504	0.0129536	0.10055
MALRD1	14.1515	0.415549	0.167344	2.48321	0.0130205	0.100951
ITPRIPL2	5.33197	0.755266	0.304363	2.48146	0.0130844	0.101138
COX6B1	6.23445	-0.573425	0.231106	-2.48122	0.0130935	0.101138
C12orf42	4.40778	-0.664192	0.267612	-2.48192	0.0130678	0.101138
ADAM19	7.98455	0.621154	0.250377	2.48088	0.013106	0.101138
CDK8	4.66256	-0.633108	0.255239	-2.48045	0.0131216	0.101141
SQSTM1	7.30979	-0.514756	0.207562	-2.48001	0.0131378	0.101147
ZMIZ1	8.35591	0.594479	0.239842	2.47863	0.0131887	0.101302
ZNF66	6.50347	0.734	0.296107	2.47884	0.0131811	0.101302
SLC2A9	4.12855	-0.683816	0.276084	-2.47684	0.0132551	0.101694
ALDH18A1	4.58703	0.757079	0.306	2.47412	0.0133566	0.102354
ATN1	9.17899	0.591259	0.23917	2.47213	0.0134313	0.102807
RAP2A	5.26892	-0.584439	0.236509	-2.47111	0.0134694	0.102952
IGFBP4	20.0448	-0.419943	0.169966	-2.47075	0.013483	0.102952
GNL1	5.71344	0.785957	0.318206	2.46996	0.0135126	0.102952
EHBP1L1	11.352	-0.496854	0.201147	-2.4701	0.0135076	0.102952
DCAKD	4.6961	0.845661	0.3426	2.46837	0.0135732	0.103294
FGFR3	3.96186	-0.708593	0.287243	-2.46688	0.0136297	0.103511
CDK6	4.87377	0.811662	0.329036	2.46679	0.013633	0.103511
SLC25A6	6.20489	0.630595	0.255739	2.46578	0.0136716	0.103565
PEX13	4.82194	-0.645183	0.261614	-2.46617	0.0136567	0.103565
FFAR1	4.16795	-0.742722	0.301394	-2.46429	0.0137286	0.103878
NOSIP	5.01217	-0.629381	0.255498	-2.46335	0.0137646	0.104031
USP25	4.30832	-0.65814	0.267469	-2.46062	0.0138698	0.104586
HSPB3	6.03076	-0.543162	0.220718	-2.46088	0.0138595	0.104586
SOX8	7.52646	0.680781	0.277017	2.45754	0.0139892	0.105366
MPC2	4.69184	-0.656707	0.267296	-2.45686	0.0140159	0.105447
IGFBP3	4.40616	0.748645	0.304846	2.45582	0.0140565	0.105632
ZNF836	4.68005	-0.668989	0.272566	-2.45441	0.0141116	0.105848
FRAS1	4.71958	0.770188	0.314022	2.45266	0.0141805	0.105848
DYNC1LI2	6.18189	0.644013	0.262421	2.45412	0.014123	0.105848
UPF2	4.4949	-0.656988	0.267871	-2.45263	0.0141816	0.105848
CTNNBL1	7.45482	0.651391	0.265578	2.45273	0.0141778	0.105848
BAHD1	4.71819	-0.646247	0.263407	-2.45342	0.0141505	0.105848
COPA	8.67621	0.52924	0.215855	2.45183	0.0142131	0.105964
CPXM1	6.08167	0.625364	0.2556	2.44665	0.0144192	0.107258
MAK16	5.4143	-0.610214	0.249398	-2.44675	0.0144151	0.107258
HDAC9	4.709	-0.650027	0.266223	-2.44166	0.01462	0.108563
NAP1L1	14.8187	0.506592	0.207495	2.44147	0.0146275	0.108563
DAPK3	8.83163	-0.491487	0.201526	-2.43883	0.0147351	0.109115
TET3	93.9669	0.332606	0.136366	2.43908	0.0147249	0.109115
IGF2BP1	6.18361	0.661322	0.271224	2.43829	0.0147571	0.109156
ITGA7	8.80688	-0.512538	0.210526	-2.43456	0.01491	0.110164
PSMC6	5.48439	-0.614364	0.252588	-2.43228	0.0150043	0.110736
QDPR	4.05392	-0.636987	0.261968	-2.43154	0.0150347	0.110837
ZNF587B	4.85059	0.752677	0.309838	2.42926	0.0151298	0.111413
BCAP31	5.70749	-0.550167	0.226541	-2.42856	0.0151591	0.111504
ERI3	4.88261	-0.591744	0.243759	-2.42758	0.0152	0.111681
MROH9	4.23374	-0.666447	0.274873	-2.42457	0.0153266	0.112486
FN3K	4.35879	-0.687678	0.283681	-2.42412	0.0153453	0.112498
B4GALT2	4.41128	0.760679	0.313985	2.42266	0.0154072	0.112826
IFITM2	28.1613	0.333299	0.137753	2.41955	0.0155398	0.113651
PAGR1	4.92016	0.777721	0.321477	2.41921	0.0155543	0.113651
FKBP11	4.96102	0.784966	0.325316	2.41294	0.0158246	0.115499
PPP5C	7.81482	-0.551374	0.228611	-2.41184	0.0158721	0.115717
GLG1	8.10129	0.60064	0.249082	2.41141	0.0158908	0.115726
PIK3CA	4.29917	-0.652924	0.270889	-2.4103	0.0159393	0.115951
MMP11	4.42983	0.84986	0.352689	2.40966	0.0159673	0.116027
AFG3L2	5.52173	-0.590167	0.245232	-2.40657	0.0161032	0.11681
TEAD4	8.12583	-0.539045	0.224004	-2.4064	0.0161105	0.11681
LRIG3	6.12135	0.624237	0.259507	2.40547	0.0161515	0.116979
H4C15	4.29356	0.761696	0.316942	2.40327	0.0162492	0.117557
HDLBP	14.4526	0.425458	0.177109	2.40223	0.0162953	0.117762
NCS1	6.84263	0.632623	0.263473	2.40109	0.0163463	0.118001
ELOB	5.0715	-0.590821	0.246174	-2.40001	0.0163946	0.118026
ZNF200	4.69322	-0.647037	0.269562	-2.40033	0.0163805	0.118026
EIF4E	5.02446	-0.579456	0.241459	-2.39981	0.0164034	0.118026
HNRNPUL2	5.75364	0.664028	0.276882	2.39823	0.0164744	0.118384
NFYB	4.28344	-0.64859	0.270527	-2.39751	0.0165071	0.118384
MACROH2A2	5.14172	-0.622658	0.259685	-2.39775	0.0164962	0.118384
TBC1D16	4.9349	0.71655	0.299105	2.39565	0.0165911	0.118729
GABARAP	10.1597	-0.449313	0.187527	-2.396	0.0165753	0.118729
EPB41L3	5.54352	-0.577823	0.241297	-2.39465	0.0166361	0.118922
CNOT1	6.11311	-0.533311	0.222757	-2.39414	0.0166593	0.118959
SRSF7	6.18173	0.695943	0.290857	2.39273	0.0167235	0.119288
ERBIN	4.82191	-0.623071	0.260451	-2.39228	0.016744	0.119305
HTATSF1	5.50033	-0.55186	0.230737	-2.39172	0.0167695	0.119359
CCNG2	8.16825	0.549328	0.229756	2.39093	0.0168059	0.11936
DCAF16	5.16931	0.704691	0.294722	2.39103	0.016801	0.11936
NT5C2	7.0026	-0.500587	0.209537	-2.38901	0.0168937	0.119854
DDRGK1	12.0201	-0.440144	0.184347	-2.38759	0.0169594	0.120191
GNL3L	7.08133	0.581473	0.243618	2.38683	0.0169945	0.120311
GRB2	9.42959	-0.466979	0.195717	-2.386	0.017033	0.120454
ELOC	4.94809	-0.585479	0.245534	-2.38451	0.017102	0.120813
FNDC1	5.2838	0.661185	0.277587	2.38191	0.0172233	0.12154
ALYREF	3.94367	0.894701	0.375815	2.38069	0.0172801	0.12181
RPS4Y1	5.05632	0.780232	0.327791	2.38027	0.0172999	0.121819
BAG5	4.29417	-0.648277	0.272561	-2.37846	0.0173849	0.122287
EMP1	4.64372	0.704093	0.296139	2.37758	0.0174268	0.122451
ADAM9	6.48803	-0.556113	0.23404	-2.37614	0.0174948	0.122799
WASL	5.4466	-0.574628	0.241997	-2.37452	0.0175716	0.122993
SH3BGR	4.90265	-0.634088	0.267053	-2.37438	0.0175782	0.122993
CHD7	4.26465	0.881099	0.371086	2.37438	0.0175783	0.122993
CDKN1C	6.31306	0.68046	0.286652	2.37382	0.0176052	0.12305
SOX11	6.32873	0.679971	0.286507	2.37331	0.0176294	0.123089
COQ9	5.86111	-0.602874	0.25422	-2.37146	0.0177179	0.123204
SEMA6C	8.94721	-0.514571	0.21699	-2.3714	0.0177206	0.123204
SH3PXD2A	8.14367	0.524083	0.220941	2.37205	0.0176899	0.123204
CCDC171	4.01716	-0.707087	0.298092	-2.37204	0.01769	0.123204
SELENON	4.5132	0.7335	0.309393	2.37077	0.0177511	0.123286
EPHA7	6.28805	0.607209	0.256242	2.36967	0.0178042	0.123525
APMAP	6.91327	0.597122	0.252694	2.36303	0.0181263	0.125627
MAP2K4	4.29737	-0.609615	0.258166	-2.36133	0.0182097	0.126073
TAS2R43	5.74601	0.665218	0.281782	2.36075	0.0182379	0.126136
IK	6.90565	-0.496095	0.210566	-2.35601	0.0184726	0.127579
PRPS1L1	4.46641	-0.650905	0.276305	-2.35575	0.0184852	0.127579
CLUAP1	3.96461	-0.661596	0.281083	-2.35374	0.0185857	0.128139
OR56B4	4.02181	-0.658908	0.280075	-2.35261	0.0186421	0.128393
ZNF423	5.44398	0.693233	0.294898	2.35076	0.0187352	0.128766
ALDH3B2	5.32343	0.681082	0.289729	2.35076	0.0187353	0.128766
FZD7	4.63132	0.739245	0.314554	2.35014	0.0187665	0.128846
ADD3	6.47724	0.639517	0.27227	2.34883	0.0188323	0.129164
FZD8	5.89277	0.715334	0.304694	2.34771	0.0188892	0.129313
SLC10A3	4.14612	-0.683487	0.291139	-2.34763	0.0188933	0.129313
SCAF8	5.21962	-0.555402	0.236844	-2.34501	0.0190265	0.13009
CAPN6	8.48757	0.503716	0.215278	2.33984	0.0192921	0.131769
BNIPL	4.39982	-0.58908	0.251909	-2.33846	0.0193634	0.13212
ZNF208	8.76169	0.521172	0.223096	2.33609	0.0194865	0.132823
NID2	5.72704	0.649985	0.278376	2.33491	0.0195479	0.133104
LAMC1	9.48596	0.57553	0.246531	2.33451	0.019569	0.133109
PIN1	5.10316	0.711012	0.304847	2.33236	0.0196817	0.133738
MPZ	4.4118	-0.944401	0.405128	-2.33111	0.0197473	0.134046
FERMT2	8.03526	-0.473268	0.203057	-2.33071	0.0197685	0.134052
BEX1	4.07209	-0.684788	0.29399	-2.32929	0.0198435	0.134423
PDIA3	5.79364	0.619671	0.266238	2.32751	0.0199383	0.13465
KIAA1217	4.4952	0.743859	0.319577	2.32764	0.0199314	0.13465
RAB5A	5.12938	-0.566685	0.243472	-2.32751	0.0199381	0.13465
RSPH1	4.18734	-0.681453	0.292957	-2.32612	0.0200121	0.134872
GPR37	4.70688	0.771884	0.331809	2.32629	0.020003	0.134872
RPL24	10.342	-0.459964	0.197966	-2.32345	0.0201548	0.135695
TMEM213	21.2225	0.480454	0.206901	2.32214	0.0202253	0.135919
YBX3	8.79166	-0.473725	0.20401	-2.32207	0.0202292	0.135919
NMRK2	5.06703	-0.634233	0.273354	-2.32019	0.0203306	0.136392
YPEL5	5.33647	-0.547478	0.235986	-2.31996	0.0203431	0.136392
YKT6	5.67803	0.637404	0.274788	2.31962	0.0203616	0.136392
UPK1B	4.22377	-0.599219	0.25869	-2.31636	0.0205385	0.137437
FBXL19	6.24116	0.637366	0.27547	2.31374	0.020682	0.137838
UGT2B11	4.12602	0.799715	0.34556	2.31426	0.0206534	0.137838
EPC1	17.4051	0.384171	0.166035	2.31379	0.0206792	0.137838
RNF144A	4.69941	0.751352	0.324727	2.31379	0.020679	0.137838
TMEM255B	4.10402	-0.665412	0.287651	-2.31326	0.0207083	0.137874
FAM3C	22.431	0.359406	0.155505	2.31121	0.0208212	0.138346
PSTPIP1	5.20889	-0.640004	0.276906	-2.31127	0.020818	0.138346
MRPL51	4.51532	-0.641055	0.277518	-2.30996	0.0208902	0.138666
TSPAN17	4.218	0.793745	0.343744	2.30912	0.0209371	0.138838
ENTPD2	4.75972	-0.58135	0.2519	-2.30786	0.0210071	0.139161
YAP1	6.97771	0.637032	0.276349	2.30517	0.0211568	0.140013
ARPP21	6.98422	0.675926	0.293534	2.30271	0.0212949	0.140786
SCAMP4	5.16635	-0.54879	0.238403	-2.30194	0.0213387	0.140933
LTBP4	13.4792	0.395152	0.171753	2.3007	0.0214086	0.141254
PRKAA2	5.11287	-0.617606	0.268591	-2.29943	0.0214805	0.141446
TBC1D17	5.27045	-0.563772	0.245179	-2.29943	0.0214806	0.141446
DDHD2	4.78693	-0.569254	0.247767	-2.29753	0.0215884	0.142014
H3C6	4.44575	0.777032	0.338732	2.29394	0.0217938	0.143223
APLP2	5.94527	0.6054	0.264034	2.29289	0.0218544	0.143427
ZFP37	8.56734	-0.453043	0.19764	-2.29227	0.0218901	0.143427
SUMO1	5.18366	-0.564069	0.246061	-2.2924	0.0218828	0.143427
DMWD	8.43858	0.576201	0.251509	2.29098	0.0219647	0.143773
MCEE	4.39724	-0.629974	0.275119	-2.28983	0.0220313	0.143976
BANF1	7.09793	-0.516613	0.225626	-2.28969	0.0220393	0.143976
PLPP4	8.2869	0.541559	0.236754	2.28743	0.0221705	0.144592
ATP6V0E1	4.77507	-0.589722	0.257823	-2.28731	0.0221775	0.144592
TTC9	4.7123	-0.590457	0.258386	-2.28518	0.0223024	0.145119
LMF2	6.8705	0.586163	0.256505	2.28519	0.0223014	0.145119
CTSK	4.301	0.885171	0.387442	2.28465	0.0223332	0.145177
DLL3	4.81921	0.766947	0.335839	2.28368	0.0223905	0.145406
ASH2L	4.01073	-0.649797	0.284804	-2.28156	0.0225155	0.146074
THAP11	4.27313	-0.643136	0.282002	-2.28061	0.0225716	0.146294
TM2D1	4.42324	0.779491	0.341954	2.27952	0.0226361	0.146424
CLTCL1	6.18888	-0.548725	0.240712	-2.2796	0.0226316	0.146424
TULP4	4.63724	-0.568502	0.249618	-2.27748	0.0227573	0.147065
COL27A1	6.50072	0.571264	0.250934	2.27655	0.0228131	0.147136
ALG14	5.37562	-0.548804	0.241044	-2.27678	0.0227992	0.147136
DIO2	5.06164	-0.560125	0.246098	-2.27603	0.0228443	0.147194
HLA-E	5.11559	0.723481	0.318229	2.27346	0.0229986	0.148044
PARP3	4.47733	-0.663689	0.292322	-2.2704	0.0231832	0.149086
FAF2	4.19711	0.736846	0.324728	2.26912	0.0232613	0.149443
SCN4A	4.49745	-0.611046	0.269396	-2.26821	0.0233165	0.149652
BTF3	10.976	-0.406936	0.179455	-2.26762	0.0233522	0.149735
NDUFA10	4.36003	0.776528	0.342519	2.26711	0.0233837	0.149792
SRP9	6.14961	0.660435	0.29143	2.26618	0.0234402	0.150008
MAST4	3.97292	-0.657537	0.290291	-2.26509	0.0235069	0.150289
FLVCR2	4.18639	-0.593165	0.262055	-2.26351	0.0236042	0.150765
C8orf82	4.61625	-0.602131	0.266255	-2.26148	0.0237294	0.151418
LSM2	4.53476	-0.601946	0.266441	-2.25921	0.0238704	0.15211
ZIC3	5.99482	0.62251	0.27557	2.25899	0.0238839	0.15211
LARP4B	7.13604	-0.541167	0.239626	-2.25838	0.0239217	0.152204
MAGEA3	33.2723	0.347854	0.154073	2.25772	0.0239633	0.152207
MFAP4	11.2075	-0.494259	0.218929	-2.25762	0.0239691	0.152207
PARP11	5.07698	-0.627466	0.277976	-2.25727	0.0239914	0.152207
SPRED1	4.92166	-0.560917	0.248646	-2.25589	0.0240777	0.152608
COL25A1	4.98901	0.677625	0.300488	2.25508	0.0241281	0.152781
UBL7	4.36095	-0.638001	0.283052	-2.25401	0.0241956	0.153061
PRPF31	4.53767	-0.613804	0.272525	-2.25228	0.0243043	0.153601
ESYT2	5.4645	-0.543037	0.241271	-2.25073	0.0244024	0.154074
CDKN2D	12.6304	0.468041	0.207996	2.25025	0.0244333	0.154121
ENTPD4	4.62809	0.70482	0.313406	2.24891	0.0245185	0.154511
PTMA	18.1917	0.471973	0.210117	2.24623	0.0246891	0.155317
COL6A6	4.20434	-0.6875	0.306078	-2.24616	0.0246935	0.155317
ARHGDIA	11.618	0.442508	0.197215	2.24378	0.0248465	0.155982
AGPS	5.44307	-0.527448	0.235042	-2.24406	0.0248288	0.155982
LMNA	18.7873	-0.370986	0.165443	-2.24238	0.0249371	0.156402
CARD11	10.3256	-0.435301	0.194198	-2.24153	0.0249916	0.156595
NDUFAB1	4.61743	-0.585787	0.261451	-2.24052	0.025057	0.156784
SHD	4.72527	0.814647	0.363627	2.24033	0.0250692	0.156784
TMPO	4.75451	0.746959	0.333913	2.23699	0.0252873	0.157105
GGCX	4.5715	-0.565482	0.252765	-2.23718	0.0252744	0.157105
SIGLEC16	12.1745	0.430977	0.192603	2.23764	0.0252445	0.157105
YWHAE	9.45257	-0.414885	0.185366	-2.23819	0.0252084	0.157105
TRPT1	4.62709	0.782498	0.349519	2.23879	0.0251698	0.157105
RNF115	5.36689	-0.54497	0.243544	-2.23767	0.0252428	0.157105
BMP4	4.45918	0.700241	0.31298	2.23734	0.0252644	0.157105
FBXO32	4.754	-0.584777	0.261488	-2.23634	0.0253296	0.15722
CYBC1	4.19704	0.74681	0.334585	2.23205	0.0256118	0.158524
GOT1	5.33881	-0.561767	0.251622	-2.23258	0.0255766	0.158524
PMEPA1	5.17279	0.686623	0.307615	2.23209	0.0256093	0.158524
OR2C3	4.09652	-0.633219	0.283991	-2.22971	0.0257665	0.15905
SPIN2B	7.84839	0.584851	0.262303	2.22968	0.025769	0.15905
AGAP9	7.93518	0.51752	0.232094	2.22979	0.0257613	0.15905
RSF1	7.07838	-0.438905	0.196903	-2.22905	0.0258109	0.159159
ASPH	9.90714	0.457946	0.205509	2.22835	0.0258574	0.159258
KXD1	4.39479	-0.568991	0.255373	-2.22808	0.0258752	0.159258
KANSL1L	4.19646	-0.606058	0.272081	-2.22749	0.0259147	0.159267
PPP1CC	6.01582	0.602446	0.270478	2.22733	0.025925	0.159267
APOBEC3A_B	69.6464	0.349549	0.157068	2.22547	0.0260498	0.159885
IGHG4	13.5106	0.405918	0.182435	2.225	0.0260815	0.159931
ZWINT	3.9671	0.750208	0.33728	2.22429	0.0261292	0.160075
ZFP36	4.42041	-0.599488	0.269749	-2.22239	0.026257	0.160411
SELENOW	9.43259	-0.511446	0.230069	-2.22301	0.0262154	0.160411
NUTF2	6.348	0.633241	0.284899	2.22268	0.0262371	0.160411
ATP6V1E1	4.2029	-0.571146	0.257108	-2.22142	0.0263223	0.160661
LOXL2	6.14454	0.586144	0.264001	2.22024	0.0264026	0.161002
FBXL20	3.95973	-0.628396	0.283351	-2.21773	0.0265731	0.161892
NDUFV3	5.88329	-0.492825	0.222376	-2.21618	0.0266794	0.16239
PSMG3	16.1628	0.392466	0.177242	2.2143	0.026808	0.162872
AHSA1	5.56429	-0.531728	0.240103	-2.21459	0.0267883	0.162872
ARMCX4	4.33379	0.743545	0.336037	2.21269	0.026919	0.163396
ELK4	4.6466	0.634672	0.287224	2.20967	0.0271278	0.164361
COPS5	4.43821	-0.594182	0.268861	-2.20999	0.0271057	0.164361
ARL17B	3.96711	0.771547	0.349237	2.20924	0.0271582	0.164394
SDCBP	5.27049	-0.539394	0.244212	-2.20872	0.0271944	0.164462
HMGA1	5.57822	-0.571955	0.259166	-2.20691	0.0273202	0.165072
HIC1	4.31963	0.707393	0.320659	2.20606	0.0273799	0.165114
GPAT4	5.87146	-0.510817	0.231626	-2.20535	0.0274295	0.165114
PPP2R5C	5.41595	-0.509912	0.231251	-2.20502	0.0274529	0.165114
DDI2	5.58289	-0.565458	0.256432	-2.2051	0.0274472	0.165114
UBTD1	4.52905	-0.569797	0.258492	-2.20431	0.0275024	0.165114
ABCB7	4.25656	-0.621197	0.281794	-2.20444	0.0274935	0.165114
UEVLD	4.29035	-0.623107	0.282524	-2.2055	0.0274191	0.165114
FAM83E	9.66397	-0.468213	0.212485	-2.20351	0.027559	0.165304
VSIG2	4.32019	-0.604865	0.274595	-2.20276	0.0276118	0.16547
SLC35E1	4.529	0.731343	0.332278	2.20099	0.0277365	0.165916
ABCF1	4.37941	0.727232	0.330394	2.20111	0.0277285	0.165916
IDH1	4.2107	-0.597257	0.271707	-2.19816	0.0279374	0.166966
SHFL	6.10615	0.597904	0.272121	2.1972	0.0280062	0.167226
NCBP1	5.57788	0.617064	0.280954	2.19631	0.0280694	0.167452
CBLC	3.96644	-0.593876	0.27064	-2.19433	0.0282113	0.167692
P2RX5	3.97704	-0.652024	0.297035	-2.19511	0.0281558	0.167692
COL1A2	999.394	0.522215	0.237962	2.19453	0.0281972	0.167692
JPH2	10.287	-0.426193	0.1942	-2.19461	0.0281914	0.167692
AHNAK	20.3401	-0.305598	0.139295	-2.19389	0.0282432	0.167731
PDE4D	9.08141	0.486505	0.221864	2.19281	0.028321	0.168041
ZNFX1	4.62229	-0.611269	0.279287	-2.18867	0.0286206	0.169666
NIT1	4.71288	-0.567787	0.259476	-2.1882	0.0286549	0.169717
DCAF7	4.00708	-0.628728	0.287667	-2.18561	0.0288438	0.170621
FZD10	4.0299	-0.669407	0.306357	-2.18505	0.028885	0.170621
MOB1B	4.23263	-0.587869	0.26902	-2.18522	0.0288724	0.170621
GASK1B	4.14479	0.696942	0.319254	2.18303	0.0290335	0.171344
FH	5.56648	-0.527756	0.242134	-2.1796	0.0292868	0.172685
SMG7	4.25177	-0.599879	0.275291	-2.17908	0.0293261	0.172762
ZCCHC24	6.66297	0.553613	0.254146	2.17832	0.029382	0.172937
ZC3H13	6.13228	0.565873	0.259835	2.17781	0.0294199	0.173006
PPP6R2	5.32031	0.671174	0.308378	2.17647	0.0295204	0.173442
RPL32	19.2205	-0.299055	0.137464	-2.17552	0.0295913	0.17358
PDE4C	7.57476	0.567274	0.260762	2.17545	0.0295965	0.17358
PITX2	4.46489	-0.619806	0.285069	-2.17423	0.0296875	0.173959
ENO1	10.2826	0.449057	0.206579	2.17378	0.029722	0.174007
RAB21	7.14771	-0.47367	0.218033	-2.17247	0.0298205	0.174274
APBA3	4.27705	0.677988	0.312077	2.1725	0.0298177	0.174274
SNRNP70	11.6124	0.492278	0.226969	2.16892	0.030089	0.175533
APOA1	5.67394	-0.553071	0.254983	-2.16905	0.0300787	0.175533
FEM1C	5.41244	-0.545694	0.251761	-2.16751	0.0301961	0.176
RAD51C	4.64524	0.711881	0.328485	2.16716	0.0302224	0.176
CLDN11	5.73537	-0.496693	0.229311	-2.16602	0.0303096	0.176351
PSMD4	6.97804	-0.493587	0.228003	-2.16482	0.0304014	0.176574
ARRDC1	18.0933	0.353501	0.163284	2.16495	0.0303914	0.176574
PSMD6	5.88095	-0.516134	0.238554	-2.16359	0.0304955	0.176965
PREP	4.67056	-0.549715	0.254122	-2.16319	0.0305263	0.176988
TP53INP2	3.95931	-0.592794	0.27419	-2.16198	0.0306196	0.177373
TCF7L2	5.15481	-0.5278	0.244323	-2.16025	0.0307531	0.17799
KHDRBS1	6.64818	0.557494	0.25819	2.15924	0.0308318	0.178289
CIPC	4.22839	-0.646814	0.299928	-2.15656	0.0310397	0.179006
C7orf33	4.92357	-0.542423	0.251533	-2.15647	0.0310471	0.179006
MEX3D	4.71097	0.673234	0.312134	2.15688	0.0310153	0.179006
IL24	51.7641	0.336952	0.156267	2.15625	0.0310642	0.179006
LOX	5.02086	0.599066	0.278054	2.15449	0.0312015	0.17964
TNFAIP1	4.4196	-0.563877	0.261826	-2.15363	0.0312691	0.179872
SNX19	5.766	0.588928	0.27355	2.15291	0.0313257	0.179936
ZC4H2	6.32255	0.584202	0.271369	2.1528	0.0313347	0.179936
S100A1	4.87214	-0.603283	0.280695	-2.14925	0.0316148	0.181386
NR1H2	7.2937	0.5802	0.270148	2.14771	0.0317368	0.181929
UBE4B	6.03294	-0.492923	0.229597	-2.1469	0.0318011	0.182138
ESYT1	5.11205	0.639123	0.297795	2.14619	0.0318581	0.182155
DDIT3	4.68573	-0.607122	0.282886	-2.14617	0.0318592	0.182155
RTN4	24.4077	-0.314438	0.146576	-2.14522	0.0319353	0.182432
CPLX2	8.47768	-0.421634	0.196634	-2.14426	0.032012	0.182712
BET1L	6.16491	0.592087	0.276227	2.14348	0.0320743	0.182752
KLHL2	4.05882	-0.576602	0.268963	-2.1438	0.032049	0.182752
ATP5ME	4.40423	-0.592082	0.276281	-2.14304	0.03211	0.182797
HNRNPR	8.96632	0.494924	0.231064	2.14194	0.0321984	0.183142
CFHR3	4.40666	-0.58638	0.273938	-2.14056	0.0323095	0.183616
NCBP2	11.3022	0.500651	0.233967	2.13983	0.0323683	0.183634
THAP4	4.95525	-0.555566	0.259628	-2.13985	0.0323667	0.183634
H4C13	6.09722	0.596539	0.278873	2.1391	0.0324272	0.183677
ACOT2	4.03557	-0.590034	0.275878	-2.13875	0.0324561	0.183677
LDHC	5.87828	-0.504183	0.235742	-2.13871	0.0324594	0.183677
ADGRL3	3.99871	0.765768	0.358202	2.13781	0.0325322	0.183774
PPME1	5.89478	-0.50612	0.236732	-2.13794	0.0325214	0.183774
KCNMA1	4.10462	0.684398	0.320285	2.13684	0.0326109	0.183948
TRAK1	10.5064	-0.446607	0.209013	-2.13674	0.0326188	0.183948
ADGRA3	6.68061	0.478053	0.223773	2.13633	0.0326523	0.183979
PSMB3	5.87865	-0.513698	0.240659	-2.13455	0.0327981	0.184643
AVEN	4.79117	-0.527968	0.247782	-2.13077	0.033108	0.185417
PYGB	5.21612	0.618988	0.290372	2.13171	0.0330306	0.185417
ECM2	5.91755	-0.481289	0.22579	-2.13158	0.0330414	0.185417
SRSF6	6.71041	0.518055	0.243119	2.13087	0.0330996	0.185417
RASA1	5.81623	-0.502987	0.236021	-2.13111	0.0330804	0.185417
PLPP1	4.8502	0.636955	0.298774	2.1319	0.0330153	0.185417
NSUN2	4.96683	-0.52051	0.244316	-2.13048	0.0331323	0.185417
ACSM5	4.10189	-0.618333	0.290361	-2.12953	0.0332101	0.185695
MRPL20	6.70187	0.594293	0.279144	2.12898	0.0332555	0.185792
FBXL13	4.2365	-0.577842	0.271465	-2.1286	0.033287	0.18581
VANGL2	4.09582	0.711768	0.334615	2.12712	0.0334099	0.186181
NAA30	4.86945	-0.534444	0.251241	-2.12722	0.0334018	0.186181
NHLH2	61.4393	0.306211	0.143983	2.12671	0.0334438	0.186195
RPS27A	10.0477	0.414272	0.194822	2.12641	0.0334688	0.186195
TRIM54	11.1111	-0.471693	0.22189	-2.12579	0.0335206	0.186326
EIF2S2	5.88493	-0.505539	0.237961	-2.12446	0.0336318	0.186787
PPAN	4.11703	0.683833	0.321995	2.12373	0.0336924	0.186966
CIAO2B	4.15145	-0.57461	0.270631	-2.12322	0.0337354	0.187047
FKBP2	4.10423	0.729391	0.343704	2.12215	0.0338255	0.187333
DCTN3	4.46313	-0.601551	0.283493	-2.12193	0.0338437	0.187333
SMAD4	4.99687	-0.546799	0.257773	-2.12124	0.0339017	0.187497
AGRN	7.87449	0.585241	0.275943	2.12087	0.0339324	0.187509
JOSD1	4.69323	-0.533764	0.251856	-2.11932	0.0340633	0.187579
IRAK1	4.99736	-0.53511	0.252525	-2.11904	0.0340872	0.187579
RBM5	7.4419	0.487114	0.229799	2.11974	0.0340282	0.187579
NDUFV1	6.67151	-0.498455	0.235169	-2.11956	0.034043	0.187579
FKBP8	4.98249	-0.551195	0.260018	-2.11984	0.0340199	0.187579
DHX36	4.6771	0.750115	0.354671	2.11496	0.0344335	0.189174
C11orf24	4.77199	0.690612	0.326566	2.11477	0.0344495	0.189174
SND1	9.68995	0.425191	0.201073	2.11461	0.034463	0.189174
CACNA2D1	13.1267	-0.379839	0.179799	-2.11258	0.0346364	0.189812
ETS2	4.2273	-0.62911	0.297792	-2.11258	0.0346368	0.189812
ZNF721	6.24648	0.559015	0.26469	2.11196	0.0346895	0.189943
PPP3CB	10.3664	-0.37123	0.175843	-2.11115	0.0347597	0.190012
NAA50	5.31928	-0.54932	0.260162	-2.11145	0.0347332	0.190012
GCM2	3.96738	-0.636949	0.301868	-2.11003	0.0348561	0.190381
XRCC5	7.99501	0.545331	0.258506	2.10955	0.0348971	0.190448
RXYLT1	3.94082	-0.597883	0.283512	-2.10884	0.0349581	0.190468
TMEM184B	5.2113	-0.529594	0.251131	-2.10884	0.0349586	0.190468
GJC1	5.5489	0.568362	0.269746	2.10703	0.0351149	0.191162
DDX39B	9.43838	0.479668	0.227833	2.10535	0.0352611	0.1918
SULT1A4	8.59841	0.496013	0.235858	2.10302	0.0354644	0.192746
AAK1	5.19741	0.651802	0.310009	2.10252	0.0355074	0.192821
SPG7	10.7086	0.433052	0.206052	2.10166	0.035583	0.193073
LMO4	4.41538	-0.54728	0.260517	-2.10074	0.0356635	0.193351
RPL7	15.9719	0.385815	0.183725	2.09996	0.0357325	0.193566
ATP5MC2	11.3517	0.467413	0.222929	2.09669	0.0360212	0.194969
ANLN	4.36209	0.685074	0.326929	2.09548	0.0361281	0.195388
KCNE5	6.11127	-0.60791	0.290364	-2.09361	0.0362946	0.195967
NLGN2	5.23714	0.586208	0.279961	2.09389	0.0362696	0.195967
RANBP1	6.21651	0.62263	0.297804	2.09074	0.0365515	0.197193
PRRT4	4.91585	-0.502742	0.240534	-2.09011	0.036608	0.197336
RPS15A	6.85846	0.519258	0.248582	2.08888	0.0367189	0.19745
XRCC2	15.387	0.38268	0.183179	2.08911	0.0366979	0.19745
LRRC39	4.73032	-0.566248	0.270996	-2.08951	0.0366622	0.19745
SMIM12	4.5417	-0.580522	0.278146	-2.08711	0.0368781	0.198145
PARVA	6.5499	0.495004	0.237531	2.08395	0.0371643	0.199329
DCHS2	5.74116	0.591813	0.284057	2.08343	0.037212	0.199329
C19orf47	5.81452	-0.507658	0.243674	-2.08335	0.0372193	0.199329
MEST	22.5498	0.380422	0.18256	2.08382	0.0371767	0.199329
ZNF384	4.76331	0.633333	0.304221	2.08182	0.0373591	0.199915
OTUD6B	5.56716	-0.467016	0.224402	-2.08116	0.0374197	0.199915
EXOC4	5.7993	0.628807	0.302133	2.08123	0.0374132	0.199915
OAZ2	6.76709	-0.452619	0.217645	-2.07963	0.0375599	0.200502
PATZ1	4.22951	0.696183	0.335044	2.07788	0.0377201	0.201194
SERF2	9.06619	0.452898	0.218115	2.07642	0.0378552	0.201752
KLF5	6.06831	-0.49765	0.239726	-2.07591	0.037902	0.201838
EML4	5.57845	0.574832	0.277	2.0752	0.0379677	0.202025
RCC2	10.5832	0.424564	0.204851	2.07255	0.0382143	0.20301
ANKRD11	7.84342	0.502848	0.242617	2.0726	0.0382091	0.20301
CITED2	5.44035	-0.528097	0.254923	-2.07159	0.0383035	0.20332
KCTD7	4.36386	0.698929	0.33773	2.06949	0.0385001	0.204199
RPS6KB2	5.92281	0.546855	0.264305	2.06903	0.0385436	0.204265
FAM13B	63.6856	-0.253603	0.122643	-2.06781	0.0386583	0.204515
MYBBP1A	4.78939	0.667396	0.322741	2.0679	0.0386495	0.204515
CEP170	6.16869	0.548461	0.265273	2.06754	0.0386837	0.204515
TAF2	5.82044	-0.463804	0.224364	-2.06719	0.0387158	0.204521
PDGFRA	7.51596	0.563905	0.272898	2.06636	0.0387949	0.204775
WSB1	10.0197	0.470123	0.227767	2.06405	0.0390127	0.20576
NATD1	4.20606	-0.559326	0.27114	-2.06287	0.039125	0.206183
PSMC5	7.02418	-0.506321	0.245483	-2.06255	0.0391554	0.206183
SMARCE1	5.41995	-0.477742	0.231669	-2.06218	0.0391907	0.206204
COG2	4.87448	-0.509983	0.247359	-2.06171	0.0392357	0.206277
ZNF470	17.7068	0.340072	0.165014	2.06086	0.0393163	0.206451
PANX1	4.30215	-0.570405	0.276801	-2.0607	0.0393314	0.206451
INTS6L	15.5677	0.413684	0.20079	2.06029	0.0393712	0.206496
PCP4	4.03914	-0.588195	0.285568	-2.05974	0.0394237	0.206607
UBL3	7.77399	0.573401	0.278647	2.0578	0.0396092	0.20725
NFAM1	14.2644	0.375806	0.182612	2.05795	0.0395954	0.20725
SLIRP	4.26563	-0.627473	0.305544	-2.05363	0.0400118	0.20919
KANK2	4.31532	0.636386	0.310017	2.05275	0.040097	0.209469
TEDC2	7.32003	0.499584	0.243645	2.05046	0.0403196	0.210466
TCF3	5.43709	0.597449	0.291485	2.04967	0.0403965	0.210476
SFRP4	20.6004	0.57156	0.278908	2.04928	0.0404351	0.210476
RNF167	18.2907	0.371321	0.181209	2.04913	0.0404491	0.210476
FAM118B	4.705	-0.502356	0.245101	-2.04959	0.0404048	0.210476
MICAL3	4.28809	-0.595376	0.290706	-2.04804	0.0405566	0.210502
RAB39A	8.15874	0.464578	0.226773	2.04864	0.0404969	0.210502
ARF4	7.37791	-0.424425	0.207261	-2.04778	0.0405818	0.210502
HSPA14	4.13642	0.693961	0.338827	2.04813	0.0405477	0.210502
EDNRA	5.05503	0.570843	0.279056	2.04563	0.0407932	0.210935
ZSCAN29	4.97367	-0.503158	0.245933	-2.04591	0.0407649	0.210935
C11orf1	4.86381	-0.545964	0.266803	-2.04632	0.0407248	0.210935
CRIP1	4.52732	-0.583617	0.285255	-2.04594	0.0407619	0.210935
HOOK2	4.04652	-0.542445	0.265457	-2.04344	0.0410093	0.211556
VASH1	5.5173	0.557848	0.27298	2.04355	0.0409983	0.211556
SMARCB1	6.34633	-0.458325	0.224233	-2.04396	0.0409571	0.211556
SEMA3A	7.16493	0.510855	0.250248	2.0414	0.0412114	0.211935
CCDC66	4.49863	-0.541418	0.265167	-2.0418	0.0411716	0.211935
INTS6	7.12883	-0.43452	0.212776	-2.04215	0.0411369	0.211935
PSMD14	6.13035	-0.466704	0.228604	-2.04154	0.041197	0.211935
ST3GAL2	4.34516	0.726192	0.355892	2.04048	0.0413021	0.212236
GOLPH3	6.38453	-0.450229	0.220775	-2.03931	0.0414187	0.21267
SNHG32	7.00318	0.532029	0.260951	2.0388	0.0414696	0.212765
FCER1G	4.61894	0.718877	0.352952	2.03675	0.0416747	0.213652
ZCCHC3	4.34674	0.689714	0.338766	2.03596	0.0417544	0.21385
MAGEL2	4.04312	-0.576364	0.283198	-2.0352	0.0418306	0.21385
MYL5	5.46583	-0.573454	0.281785	-2.03508	0.0418431	0.21385
TACC3	4.42481	0.692694	0.340295	2.03557	0.0417934	0.21385
LCE2D	10.0787	0.570448	0.280496	2.03372	0.0419803	0.214251
ZNF146	6.43366	0.573451	0.28198	2.03365	0.0419865	0.214251
SERPINH1	13.4249	0.418667	0.205913	2.03322	0.04203	0.214308
ADAMTS1	5.49799	-0.503421	0.24768	-2.03254	0.0420985	0.214326
SHB	4.94052	-0.551886	0.271488	-2.03282	0.0420705	0.214326
APOO	13.4392	-0.339654	0.167172	-2.03177	0.0421773	0.214561
GADD45GIP1	4.43081	-0.538218	0.265037	-2.03073	0.0422827	0.214931
SIAH1	4.51685	-0.54372	0.268005	-2.02877	0.0424818	0.215518
ZNF761	5.64662	0.561616	0.276845	2.02863	0.0424961	0.215518
ETFBKMT	4.24833	-0.529038	0.260716	-2.02917	0.0424409	0.215518
COL9A3	4.6413	0.665266	0.328224	2.02686	0.0426765	0.216267
ZXDC	5.46087	-0.490054	0.241849	-2.02628	0.0427363	0.216404
M6PR	4.48097	0.661717	0.326737	2.02523	0.042844	0.216743
ETFDH	4.81958	-0.53273	0.263078	-2.02498	0.042869	0.216743
MFAP2	6.07177	-0.480062	0.237189	-2.02396	0.0429741	0.216801
BRPF3	4.8796	0.609263	0.300967	2.02435	0.042934	0.216801
PLIN3	6.05214	-0.470482	0.232462	-2.02391	0.0429791	0.216801
RPL6	17.0799	0.362269	0.179203	2.02155	0.0432226	0.217863
PSMA1	6.8282	-0.447219	0.22127	-2.02115	0.0432646	0.217908
CXXC1	3.97328	0.716166	0.354472	2.02037	0.0433446	0.218145
ABCA3	4.82247	-0.52828	0.262024	-2.01616	0.0437837	0.219815
[truncated: 9,817 more rows]
