# Supplementary material
Source: Research Square preprint supplement (doi:10.21203/rs.3.rs-9408825/v1)
Supplement: Supplementary file 2 [file 111bca76a55f68e90b0f2177.xlsx]

## Sheet: PC1_top_Genes
Gene	Loading	Direction
NOTCH3	0.0613153	PAX7
SLC25A19	0.0500706	PAX7
TNC	0.0467129	PAX7
CCND2	0.0426865	PAX7
ELN	0.0418747	PAX7
LAIR1	0.0418095	PAX7
COL4A1	0.0417346	PAX7
MICAL1	0.0413833	PAX7
SYTL2	0.0393671	PAX7
MATN2	0.0388986	PAX7
KRT28	0.038777	PAX7
CD82	0.0386616	PAX7
COL4A2	0.0375441	PAX7
PLAGL1	0.0373954	PAX7
LFNG	0.0364552	PAX7
AEBP1	0.0356925	PAX7
SPARCL1	0.0341483	PAX7
H4C15	0.0338724	PAX7
CERCAM	0.0334904	PAX7
EOMES	0.0334743	PAX7
PTMS	0.0323269	PAX7
C1QTNF3	0.0322942	PAX7
CDKN2D	0.0320305	PAX7
H3C2	0.0320168	PAX7
LENG8	0.0315376	PAX7
TCF12	0.0314904	PAX7
COL6A3	0.0312632	PAX7
RGMA	0.0312044	PAX7
CUL7	0.0308418	PAX7
TMEM106C	0.030693	PAX7
MKI67	0.0306611	PAX7
NPIPA1	0.0304153	PAX7
CD44	0.0299226	PAX7
CD200	0.0297602	PAX7
COL6A1	0.02967	PAX7
NECTIN1	0.0295483	PAX7
EPB41L2	0.0294148	PAX7
UBXN11	0.0292531	PAX7
SH3BP2	0.0291409	PAX7
H3C8	0.0290117	PAX7
RRBP1	0.0288533	PAX7
HEY1	0.0286746	PAX7
KRAS	0.0286195	PAX7
POU5F1	0.0284872	PAX7
HR	0.0284058	PAX7
CDC25C	0.0281627	PAX7
TAS1R3	0.0280038	PAX7
H1-5	0.0279465	PAX7
SPATS2L	0.027824	PAX7
PIK3R2	0.0277733	PAX7
PXDN	0.0277113	PAX7
IL24	0.0276456	PAX7
POU4F1	0.0274321	PAX7
CRMP1	0.0273193	PAX7
H3C7	0.0271329	PAX7
PKNOX1	0.0271187	PAX7
CPNE5	0.0270382	PAX7
SOX4	0.0269853	PAX7
LMNB2	0.0269235	PAX7
GNRH2	0.0269217	PAX7
PCDH7	0.0267783	PAX7
H4C12	0.0266633	PAX7
PHACTR2	0.0266221	PAX7
CYTH2	0.0265972	PAX7
SUN2	0.0264422	PAX7
CILP2	0.0263474	PAX7
HELLS	0.0263231	PAX7
EMILIN1	0.0262997	PAX7
CCDC86	0.0262845	PAX7
SOX10	0.0262559	PAX7
RTL10	0.0261674	PAX7
SMC4	0.0261423	PAX7
MRPL41	0.0261416	PAX7
H3C10	0.0260482	PAX7
SRSF7	0.0258879	PAX7
RHPN2	0.0257645	PAX7
IQGAP1	0.0257498	PAX7
TAF1D	0.0257337	PAX7
APOF	0.0256338	PAX7
VCAN	0.0254848	PAX7
RAB3D	0.0254688	PAX7
SRSF5	0.0254663	PAX7
FLNA	0.0254171	PAX7
CHD6	0.0253467	PAX7
RPRD1B	0.0252687	PAX7
KRTAP5-8	0.0252224	PAX7
ADPRS	0.0251471	PAX7
ACVR2A	0.0249659	PAX7
SHISA2	0.0248834	PAX7
FBLN2	0.0248432	PAX7
EFS	0.0247804	PAX7
ZNF83	0.024725	PAX7
MID1IP1	0.0247226	PAX7
KCTD12	0.0245884	PAX7
PITX2	0.0245779	PAX7
PMFBP1	0.0245621	PAX7
SHFL	0.0245049	PAX7
LAMB1	0.0244894	PAX7
MYH4	0.0242943	PAX7
GNL3	0.024281	PAX7
IGFBP2	0.0242655	PAX7
MTRNR2L10	0.0241651	PAX7
SSC5D	0.0240991	PAX7
VSIG2	0.0240329	PAX7
OLFML2A	0.023999	PAX7
HRK	0.023996	PAX7
FOXG1	0.0239839	PAX7
DDX42	0.023975	PAX7
ACTR1B	0.0239032	PAX7
ZNF142	0.0238786	PAX7
HLA-A	0.0238008	PAX7
SEMA3A	0.0237801	PAX7
CACNA1I	0.0237454	PAX7
MACROH2A1	0.023694	PAX7
TJAP1	0.0236708	PAX7
ILF3	0.023603	PAX7
CEP55	0.0235503	PAX7
ZNF580	0.0235123	PAX7
BGN	0.0235083	PAX7
GNPTG	0.0234143	PAX7
RBM4	0.0233881	PAX7
SCYL3	0.0232513	PAX7
DPYSL2	0.0232454	PAX7
RAD9A	0.0232023	PAX7
MRPS26	0.0231317	PAX7
TACC3	0.0230886	PAX7
MYOCD	0.0230506	PAX7
LY6E	0.0229907	PAX7
KDM1A	0.0229506	PAX7
SLC44A2	0.0229096	PAX7
IZUMO1R	0.0229005	PAX7
PLEKHG2	0.0228915	PAX7
MIDEAS	0.0228616	PAX7
C8orf82	0.0228414	PAX7
IVNS1ABP	0.0228078	PAX7
PPP6R2	0.0227571	PAX7
FSD1	0.0227155	PAX7
WASHC1	0.0226426	PAX7
DNAJC8	0.0226368	PAX7
PHF1	0.022633	PAX7
IGHG3	0.0225661	PAX7
TTLL1	0.0225618	PAX7
GXYLT2	0.0225586	PAX7
TSPAN12	0.0225352	PAX7
RNF215	0.0224456	PAX7
EEF2K	0.0224324	PAX7
ZNF680	0.0223913	PAX7
SARDH	0.0223786	PAX7
ZNF655	0.0223504	PAX7
MEX3D	0.0223144	PAX7
RABL2B	0.0222928	PAX7
CCDC88B	0.0222807	PAX7
DIO3	0.0222644	PAX7
CSTF3	0.022207	PAX7
MEPCE	0.0222059	PAX7
TTYH3	0.0221716	PAX7
NOTCH2	0.0221575	PAX7
PHAX	0.0221393	PAX7
CCDC47	0.0221247	PAX7
IGSF1	0.0220811	PAX7
IGFL3	0.0220343	PAX7
ZNF622	0.0220326	PAX7
SAMD10	0.0220227	PAX7
PUS10	0.0220048	PAX7
FAM155B	0.0219764	PAX7
KLK3	0.0219282	PAX7
PABPC1	0.0218877	PAX7
CYP46A1	0.021879	PAX7
ZNF707	0.0218767	PAX7
COL5A1	0.0218543	PAX7
PARP14	0.0218462	PAX7
FBXO48	0.021721	PAX7
GDI1	0.0217146	PAX7
MCM3	0.0216621	PAX7
PKP1	0.0216534	PAX7
ANKRD13D	0.0216174	PAX7
RALBP1	0.0216045	PAX7
IL17RD	0.0216027	PAX7
RIF1	0.021596	PAX7
MLXIP	0.0215883	PAX7
ZNF417	0.0215835	PAX7
FAM180B	0.0215651	PAX7
CTSK	0.0215223	PAX7
SLC2A5	0.0215165	PAX7
CCND1	0.0215072	PAX7
NOTCH2NLA	0.0214549	PAX7
CPN1	0.0214287	PAX7
CDH11	0.0213806	PAX7
NGFR	0.02138	PAX7
PRSS3	0.0213661	PAX7
COL6A6	0.0213569	PAX7
ZFP90	0.0213482	PAX7
TEAD2	0.0213132	PAX7
TUSC2	0.0213053	PAX7
SMARCB1	0.0212967	PAX7
SPATC1L	0.021247	PAX7
NINJ1	0.021204	PAX7
APH1B	0.0211825	PAX7
CHODL	0.021174	PAX7
HP1BP3	0.0211421	PAX7
CA3	-0.0855359	Myofiber
MYBPC1	-0.0828847	Myofiber
TTN	-0.0787967	Myofiber
MYH3	-0.0779012	Myofiber
ACTN2	-0.077491	Myofiber
MYH7	-0.0757352	Myofiber
TPM3	-0.0744202	Myofiber
LDB3	-0.0742993	Myofiber
BIN1	-0.072374	Myofiber
THBS4	-0.0721781	Myofiber
TNFAIP8	-0.0717698	Myofiber
SLN	-0.0716227	Myofiber
NEB	-0.0708089	Myofiber
HSPB8	-0.0702808	Myofiber
MYL1	-0.0689146	Myofiber
MYL9	-0.0674314	Myofiber
CRYAB	-0.0666773	Myofiber
MYBPH	-0.0644697	Myofiber
TNNT3	-0.0641243	Myofiber
PAGE5	-0.0633238	Myofiber
NRAP	-0.0615453	Myofiber
PDE4DIP	-0.0610983	Myofiber
CCDC51	-0.0600492	Myofiber
SMYD1	-0.0593933	Myofiber
MB	-0.0588655	Myofiber
CDKN1A	-0.0587026	Myofiber
TPM1	-0.0583958	Myofiber
SP7	-0.0574905	Myofiber
AK1	-0.0572777	Myofiber
MYLPF	-0.0571857	Myofiber
MYL4	-0.056759	Myofiber
TNNC2	-0.0557575	Myofiber
ACTC1	-0.0548765	Myofiber
ACTN3	-0.0542559	Myofiber
TNNT1	-0.053833	Myofiber
TNNI2	-0.0535752	Myofiber
ATP2A2	-0.0534674	Myofiber
TNNC1	-0.0529431	Myofiber
ZNF106	-0.0529172	Myofiber
CHRNA1	-0.0527229	Myofiber
CASQ2	-0.0520008	Myofiber
GGTLC1	-0.0518959	Myofiber
MYOM3	-0.0516728	Myofiber
DES	-0.0514038	Myofiber
TPM2	-0.0513962	Myofiber
NEBL	-0.0510869	Myofiber
MYL12A	-0.0510415	Myofiber
NCK1	-0.0507344	Myofiber
CHRNG	-0.0503814	Myofiber
SETD7	-0.0503351	Myofiber
ACTA2	-0.0498026	Myofiber
MYOM1	-0.0496137	Myofiber
UNC45B	-0.0491056	Myofiber
MYOG	-0.0491026	Myofiber
NPNT	-0.0490996	Myofiber
GYS1	-0.0487834	Myofiber
POSTN	-0.048676	Myofiber
ENO3	-0.0478019	Myofiber
CFL2	-0.0471866	Myofiber
ALDOA	-0.0471179	Myofiber
MYL6B	-0.0470199	Myofiber
KIF1B	-0.0468728	Myofiber
SMIM17	-0.0465221	Myofiber
PDLIM3	-0.0459824	Myofiber
MUSTN1	-0.0458395	Myofiber
HSPA8	-0.045421	Myofiber
FHL1	-0.0453923	Myofiber
PCBP1	-0.0442963	Myofiber
SRL	-0.0441848	Myofiber
NACA	-0.0440991	Myofiber
CACNA2D1	-0.043985	Myofiber
XIRP2	-0.0439513	Myofiber
MZT2B	-0.0438525	Myofiber
MYL3	-0.0436537	Myofiber
CKM	-0.0432676	Myofiber
STIP1	-0.0427832	Myofiber
TCAP	-0.0427294	Myofiber
RBM24	-0.0425731	Myofiber
TPI1	-0.0424053	Myofiber
CHRND	-0.0416585	Myofiber
TCEAL7	-0.0412984	Myofiber
IL32	-0.0408747	Myofiber
EEF1G	-0.0407839	Myofiber
HSPB1	-0.0406864	Myofiber
ACTA1	-0.0406785	Myofiber
STAC3	-0.0404866	Myofiber
CSDE1	-0.0401262	Myofiber
LDHA	-0.0398346	Myofiber
KLHL41	-0.0398072	Myofiber
CAP2	-0.0396484	Myofiber
PRKAR1A	-0.0394958	Myofiber
PADI2	-0.0392352	Myofiber
NFE2L1	-0.0387164	Myofiber
JPT1	-0.0386478	Myofiber
C12orf57	-0.0385618	Myofiber
SDCBP	-0.0384297	Myofiber
TRDN	-0.0383108	Myofiber
TMOD1	-0.0382699	Myofiber
RTL1	-0.0382201	Myofiber
FLNC	-0.0379845	Myofiber
PRKACA	-0.0379812	Myofiber
OSBPL2	-0.037565	Myofiber
NNMT	-0.0375473	Myofiber
SVIL	-0.0374317	Myofiber
MYOZ1	-0.0373594	Myofiber
PPP1R12B	-0.0371945	Myofiber
RPS17	-0.0369913	Myofiber
MEF2C	-0.0367277	Myofiber
AK8	-0.0366022	Myofiber
MYOZ2	-0.0358594	Myofiber
MAP2K1	-0.0356438	Myofiber
SERPINF1	-0.035575	Myofiber
C4orf54	-0.0353437	Myofiber
RPL32	-0.0350593	Myofiber
RPL26L1	-0.0350408	Myofiber
ADPRHL1	-0.0349099	Myofiber
RGS2	-0.0345908	Myofiber
LDHB	-0.0345256	Myofiber
MYH8	-0.0344621	Myofiber
EIF4G2	-0.0340484	Myofiber
SMPX	-0.0340439	Myofiber
NES	-0.0339221	Myofiber
AGL	-0.0338342	Myofiber
HSP90AB1	-0.0336259	Myofiber
TLE5	-0.0334982	Myofiber
RPS28	-0.0334891	Myofiber
ATP5F1B	-0.0334635	Myofiber
GNAS	-0.0334214	Myofiber
SRPK3	-0.0334151	Myofiber
TESC	-0.033236	Myofiber
MYOM2	-0.0332244	Myofiber
RTN4	-0.0331106	Myofiber
UBB	-0.0330895	Myofiber
SELENOW	-0.0329821	Myofiber
UPK1B	-0.0328008	Myofiber
STK25	-0.0326767	Myofiber
CAPNS1	-0.0326596	Myofiber
CYB5R1	-0.0326293	Myofiber
PLD3	-0.032295	Myofiber
NDRG2	-0.0320779	Myofiber
USO1	-0.0320565	Myofiber
RPL37	-0.0314952	Myofiber
SYNPO2L	-0.0313933	Myofiber
RPL35	-0.0312203	Myofiber
EIF3K	-0.0311862	Myofiber
MAP4	-0.0308825	Myofiber
RPL37A	-0.0307671	Myofiber
KCNE5	-0.0306057	Myofiber
DDX4	-0.0305213	Myofiber
TRAK1	-0.0303482	Myofiber
CCDC8	-0.0301102	Myofiber
SEMA6C	-0.0300874	Myofiber
EHBP1L1	-0.0299572	Myofiber
DNTT	-0.0298284	Myofiber
RPL21	-0.0298176	Myofiber
SERBP1	-0.0297559	Myofiber
ATP5MC3	-0.0295624	Myofiber
RYR1	-0.0295386	Myofiber
PEG10	-0.0294752	Myofiber
ATP1B4	-0.0294496	Myofiber
TCEA3	-0.0291994	Myofiber
MDH1	-0.0289534	Myofiber
SNCA	-0.0288234	Myofiber
ATP5F1A	-0.0287427	Myofiber
TACC2	-0.028708	Myofiber
RPL26	-0.0286438	Myofiber
GPC1	-0.0285506	Myofiber
HSPA9	-0.0284559	Myofiber
MYL2	-0.0283756	Myofiber
HSPB2	-0.0279907	Myofiber
UQCRC2	-0.0277609	Myofiber
DNAJA4	-0.027752	Myofiber
HIPK3	-0.0277247	Myofiber
ITM2B	-0.0276887	Myofiber
RPS4X	-0.0276466	Myofiber
BLCAP	-0.0273653	Myofiber
SPTB	-0.0270891	Myofiber
PYGM	-0.0270449	Myofiber
FKBP3	-0.026995	Myofiber
C1QL2	-0.0269218	Myofiber
LCE2D	-0.0268197	Myofiber
RRAD	-0.0267941	Myofiber
BAG3	-0.026709	Myofiber
CANX	-0.0266772	Myofiber
RPL34	-0.0265917	Myofiber
TRIM54	-0.0265167	Myofiber
FBXO15	-0.0264375	Myofiber
HRC	-0.0264119	Myofiber
FNDC1	-0.0262536	Myofiber
ATP1A2	-0.026076	Myofiber
SYPL2	-0.0259121	Myofiber
RASL10A	-0.0258332	Myofiber
SIGIRR	-0.0256698	Myofiber
B3GAT3	-0.0256572	Myofiber
TSPAN13	-0.0256447	Myofiber
PDE6D	-0.0256203	Myofiber
PDZRN3	-0.0255116	Myofiber
SPTBN1	-0.0253759	Myofiber
RPL7	-0.0253597	Myofiber
MLLT11	-0.0253358	Myofiber

## Sheet: PC2_top_Genes
Gene	Loading	Direction
R3HDM4	0.0883503	MDX
PAM16	0.0878991	MDX
RPLP1	0.087811	MDX
CKB	0.0784761	MDX
MYH7B	0.0718519	MDX
MB	0.0694807	MDX
SP7	0.0680045	MDX
PNLIPRP3	0.0650414	MDX
RPS2	0.0622036	MDX
EBI3	0.0621927	MDX
ACTA1	0.0614525	MDX
MTRNR2L1	0.0602114	MDX
FHL1	0.0600683	MDX
TNNT1	0.0567284	MDX
SYNE3	0.0560445	MDX
RARRES2	0.055328	MDX
MICALL2	0.052832	MDX
TPM2	0.0524826	MDX
GNAS	0.0521181	MDX
TMA7	0.0519004	MDX
CKM	0.0509701	MDX
PDLIM3	0.050628	MDX
DES	0.0503303	MDX
PITX1	0.0502798	MDX
HMGB1	0.050038	MDX
RPL18	0.0482201	MDX
RPL23	0.0464605	MDX
IGHG3	0.0458956	MDX
HTRA3	0.0455917	MDX
RPS19	0.0455751	MDX
ATP2A1	0.0451863	MDX
FAM155B	0.0446265	MDX
APOF	0.0443511	MDX
COX8A	0.0443078	MDX
HPS1	0.0442452	MDX
NRBP1	0.044209	MDX
GNRH2	0.0440733	MDX
RPS3	0.0439312	MDX
TNNT2	0.0436272	MDX
CFAP99	0.0433421	MDX
IFRD2	0.0427195	MDX
MYO18A	0.0425507	MDX
MYL3	0.042013	MDX
SLC35D2	0.0419339	MDX
TNNC1	0.0415055	MDX
FGD3	0.0414484	MDX
SSMEM1	0.0413384	MDX
RBM42	0.0408991	MDX
CRIP2	0.0407841	MDX
DMPK	0.0406075	MDX
ATP5MC3	0.0404889	MDX
ATP2A3	0.0404797	MDX
SCYL3	0.0403626	MDX
FGFRL1	0.0403284	MDX
UBXN11	0.0395924	MDX
TCAP	0.0395602	MDX
PKMYT1	0.0395452	MDX
TRAF3IP1	0.0395128	MDX
MYL2	0.0390511	MDX
C6	0.0386808	MDX
IGFBP4	0.0386284	MDX
FSCN1	0.0384689	MDX
RPS25	0.0382476	MDX
FLNC	0.0381598	MDX
RPL11	0.0380753	MDX
TNNC2	0.0379263	MDX
KDM4B	0.0378646	MDX
SPATA31A6	0.0376538	MDX
PAFAH1B2	0.0376522	MDX
NDUFA1	0.0371075	MDX
COL1A1	0.0370936	MDX
SULF1	0.0368451	MDX
MRPL41	0.0365943	MDX
SOX10	0.0364899	MDX
PFN1	0.0363603	MDX
PHF2	0.0362753	MDX
TRIM72	0.0361458	MDX
RPL13	0.0360449	MDX
ZNF764	0.0356584	MDX
COL1A2	0.0355757	MDX
RPLP2	0.0354926	MDX
PABPC1	0.0353038	MDX
BGN	0.0351513	MDX
EPN1	0.035108	MDX
S100A4	0.0350369	MDX
CDK5R2	0.0349093	MDX
PAGE5	0.034791	MDX
JOSD2	0.034185	MDX
AK1	0.0341816	MDX
CKMT2	0.0340959	MDX
TGFB3	0.0340491	MDX
DELE1	0.0337339	MDX
ANKRD36B	0.0336161	MDX
OR11H6	0.0333816	MDX
RPL7A	0.0332016	MDX
HMGN2	0.0331006	MDX
PDAP1	0.033094	MDX
DKK1	0.0330123	MDX
STAC3	0.0329995	MDX
TAGLN	0.0329967	MDX
ATP1B1	0.0329137	MDX
MYLPF	0.0327947	MDX
ZNF655	0.0326532	MDX
EEF1A2	0.0326134	MDX
IGF2	0.0323729	MDX
MIDN	0.0323033	MDX
GNG5	0.0322704	MDX
CDKN2D	0.0320433	MDX
PIN1	0.0320424	MDX
EIF3L	0.0319795	MDX
CLEC11A	0.0319794	MDX
GATD3A	0.0319292	MDX
CMA1	0.0318661	MDX
ENO3	0.0318512	MDX
H4C15	0.0316676	MDX
CRYBB3	0.0316112	MDX
BIN1	0.031598	MDX
PITX2	0.0311913	MDX
ZYX	0.0311624	MDX
OST4	0.0310194	MDX
MYL12B	0.030778	MDX
MAP2K2	0.0307638	MDX
ATP5F1D	0.0307158	MDX
SBK1	0.0306923	MDX
CFAP410	0.0306886	MDX
RPL12	0.0306811	MDX
PHLDA3	0.0306552	MDX
NMRK2	0.0304634	MDX
RYR1	0.0303388	MDX
PPP2R3B	0.0302492	MDX
CHRNG	0.0302206	MDX
SHD	0.0300951	MDX
ARPP21	0.029997	MDX
MRC2	0.029941	MDX
CACNG1	0.0298749	MDX
TNIP1	0.0295658	MDX
CCDC107	0.0295016	MDX
FAM83E	0.029501	MDX
MICOS13	0.0294297	MDX
RRBP1	0.0294225	MDX
PTBP1	0.0293667	MDX
PKM	0.0293469	MDX
RPS29	0.0292949	MDX
SNURF	0.0292536	MDX
DIO3	0.0291064	MDX
CD248	0.0290762	MDX
FOXG1	0.0288802	MDX
RPL29	0.0286984	MDX
PUSL1	0.0286838	MDX
KRTAP5-8	0.0286416	MDX
OBSCN	0.0286287	MDX
PMFBP1	0.0286165	MDX
RPS4Y1	0.028488	MDX
NAT8L	0.02831	MDX
NDUFA13	0.0282811	MDX
RPL37A	0.028277	MDX
CCL24	0.0282519	MDX
MYH1	0.0280862	MDX
MYLK3	0.028032	MDX
GFAP	0.0280175	MDX
HSPB7	0.028002	MDX
SAA2	0.0279749	MDX
COL16A1	0.0278791	MDX
RPS21	0.0278346	MDX
PADI2	0.0277392	MDX
MED10	0.0277381	MDX
MGP	0.0276816	MDX
MAP1A	0.0275531	MDX
ALG12	0.0273245	MDX
S100PBP	0.0272264	MDX
COIL	0.0271941	MDX
RNF181	0.0271666	MDX
ITPKB	0.0270717	MDX
DMWD	0.0270371	MDX
NNAT	0.0270354	MDX
TPI1	0.0269609	MDX
NDUFA4	0.026924	MDX
COL6A2	0.0268701	MDX
ZNF28	0.026853	MDX
TPPP3	0.026825	MDX
RPS16	0.0267831	MDX
DGCR6L	0.0267145	MDX
ZNF776	0.0266411	MDX
TNNI1	0.026586	MDX
MACROH2A1	0.0265692	MDX
ATXN10	0.0265143	MDX
RPL27A	0.026514	MDX
ATG13	0.0265054	MDX
MYL4	0.0264931	MDX
BCAR1	0.0264864	MDX
OR7A10	0.0264277	MDX
ANO2	0.0264147	MDX
HSPB1	0.026379	MDX
GATD1	0.0263344	MDX
CYC1	0.0262685	MDX
FXYD1	0.0262525	MDX
TRPC4AP	0.0262318	MDX
ANGPTL2	0.0260939	MDX
ECH1	0.0259859	MDX
PIGQ	0.0258868	MDX
ZNF506	-0.0839132	WT
MZT2B	-0.0675743	WT
NREP	-0.0672596	WT
ZNF267	-0.066123	WT
LYRM2	-0.0649759	WT
COL4A1	-0.0639237	WT
DDX17	-0.060844	WT
THBS4	-0.0597303	WT
PXDN	-0.05908	WT
SLC25A19	-0.0577971	WT
NBPF14	-0.0557949	WT
ZNF540	-0.0543802	WT
ZNF140	-0.0524904	WT
FAM13B	-0.05105	WT
ZNF106	-0.0509258	WT
ZFP37	-0.0502775	WT
NCOA1	-0.0472489	WT
ZNF383	-0.047226	WT
XRCC2	-0.0468711	WT
SPARCL1	-0.0465949	WT
CDK6	-0.0461213	WT
C4orf46	-0.0458152	WT
COL6A6	-0.0455919	WT
OLFML2A	-0.0455725	WT
UBE2Z	-0.0454909	WT
COL15A1	-0.0435206	WT
LAMB1	-0.0427522	WT
GNA15	-0.0425251	WT
RASL10A	-0.0424422	WT
ZNF493	-0.0418349	WT
CANX	-0.0410407	WT
MAZ	-0.0390554	WT
C1QL2	-0.0390172	WT
FN1	-0.0390115	WT
CNR1	-0.0388268	WT
COL6A1	-0.0386291	WT
LENG8	-0.0383891	WT
STOX2	-0.0383405	WT
AEBP1	-0.0380619	WT
PLAGL1	-0.0378527	WT
NTN4	-0.0373063	WT
PTPN12	-0.0371661	WT
DAPK1	-0.0370137	WT
MTRNR2L10	-0.0361187	WT
WNK1	-0.0359768	WT
SMYD1	-0.0359502	WT
ZNF334	-0.0357506	WT
NPIPB6	-0.0356171	WT
CCDC14	-0.0355199	WT
ACTN2	-0.0351612	WT
PARM1	-0.035041	WT
CDKN1C	-0.0348643	WT
RAD23B	-0.0346868	WT
COL5A1	-0.0346619	WT
CTNNB1	-0.0344615	WT
DOCK7	-0.0344214	WT
CCND2	-0.0342371	WT
HNRNPR	-0.0340773	WT
CFHR3	-0.0340436	WT
HSP90AB1	-0.0340314	WT
VCAN	-0.0340193	WT
EPC1	-0.0339555	WT
EIF4EBP2	-0.0338996	WT
INTS6	-0.033753	WT
ZNF586	-0.0335902	WT
COL5A2	-0.033568	WT
DCAF12L1	-0.0333035	WT
MAGEA3	-0.0332287	WT
DDX19A	-0.0332162	WT
SGCD	-0.0329603	WT
SETD5	-0.0328148	WT
ITM2B	-0.0325501	WT
LAMA2	-0.0321449	WT
ZNF799	-0.0321159	WT
FSTL1	-0.0320571	WT
OLR1	-0.0319051	WT
TFG	-0.0317913	WT
FZD4	-0.0316748	WT
SNCA	-0.0315937	WT
HGF	-0.031497	WT
AEBP2	-0.0313768	WT
CDK8	-0.031359	WT
ABCG1	-0.0311448	WT
DPYSL3	-0.0309788	WT
NCOR2	-0.0308467	WT
SNHG32	-0.0308202	WT
DAG1	-0.0306693	WT
CHD4	-0.0306451	WT
UPK1B	-0.0305483	WT
LNPEP	-0.0304261	WT
CLCN5	-0.0304135	WT
ARRDC1	-0.0303607	WT
SLC38A2	-0.030218	WT
GUCD1	-0.0302129	WT
ZMYM2	-0.0302056	WT
UFM1	-0.0301622	WT
PHAX	-0.0301429	WT
SPATS2L	-0.0300885	WT
CAPN15	-0.0298921	WT
GRIP1	-0.0298344	WT
TESC	-0.0297885	WT
EWSR1	-0.0297656	WT
CHSY1	-0.0297603	WT
PLPP1	-0.0296214	WT
ZFAND3	-0.0294774	WT
GTF2I	-0.0294158	WT
NFIB	-0.029396	WT
MYH3	-0.0292974	WT
SKI	-0.029255	WT
PALD1	-0.0291392	WT
ASH1L	-0.0288025	WT
ARHGEF40	-0.0287973	WT
MORF4L1	-0.0286955	WT
ZC3H11A	-0.0285953	WT
TMEM63A	-0.028446	WT
MYADM	-0.0282967	WT
ZNF391	-0.0282591	WT
SLC35E4	-0.0282208	WT
VGLL3	-0.0281741	WT
ZNF587	-0.0281616	WT
FNBP1L	-0.0281309	WT
NOTCH2	-0.0280322	WT
CCDC86	-0.0279527	WT
ZNF260	-0.0279355	WT
PCBP1	-0.0279107	WT
SYTL2	-0.0278116	WT
SNRNP200	-0.0277476	WT
CCT5	-0.0276961	WT
MYH9	-0.0275925	WT
OLFML3	-0.0273799	WT
ZFP36L1	-0.0273611	WT
ITM2A	-0.0272476	WT
ATP2B4	-0.0271214	WT
POTEG	-0.0270614	WT
RAF1	-0.0268358	WT
MGAT5	-0.026818	WT
MYL12A	-0.0268157	WT
COL4A2	-0.0267914	WT
SEPTIN11	-0.0266106	WT
ANKRD50	-0.02654	WT
MICAL1	-0.0265222	WT
THRAP3	-0.0263681	WT
ZNF836	-0.0262891	WT
DEFA1B	-0.0261812	WT
FHIP1B	-0.0261419	WT
MEGF10	-0.0260766	WT
SETD7	-0.0260606	WT
TMEM50B	-0.0260078	WT
ARL15	-0.0258925	WT
SDCBP	-0.0258643	WT
TNFAIP8	-0.0258419	WT
ZNF454	-0.025789	WT
PCDH11X	-0.0257501	WT
MXD4	-0.0257446	WT
MARCHF7	-0.0257187	WT
INTS2	-0.0257137	WT
PITPNB	-0.0256971	WT
TTC3	-0.0256887	WT
SF3B3	-0.0256366	WT
SNX5	-0.0255707	WT
HNRNPH1	-0.02533	WT
CSNK1A1	-0.0253273	WT
DDX50	-0.0251899	WT
ETV3	-0.0251283	WT
RAD21	-0.0251062	WT
DHX8	-0.025092	WT
ZNF146	-0.024989	WT
HEYL	-0.0249852	WT
FNBP4	-0.0249526	WT
UBR4	-0.0249039	WT
DDX4	-0.0248217	WT
BARD1	-0.0248097	WT
STAU1	-0.0248047	WT
DNTT	-0.0246258	WT
SRSF8	-0.0245959	WT
PCGF5	-0.0245256	WT
FGF13	-0.0244197	WT
CD44	-0.0243508	WT
APBB3	-0.0242885	WT
LDHB	-0.0242306	WT
ILF3	-0.0242172	WT
ASXL2	-0.0242091	WT
TUBB	-0.024207	WT
ZNF680	-0.0241623	WT
SEMA6A	-0.0241517	WT
TTN	-0.0241345	WT
WASF2	-0.0240161	WT
DSN1	-0.0239893	WT
APP	-0.0239524	WT
UBP1	-0.0239301	WT
SUGP2	-0.023811	WT
ZNF721	-0.0237645	WT
RNF113A	-0.023668	WT
SLC12A4	-0.0236672	WT
TTYH2	-0.0236442	WT
LY6G5B	-0.0236229	WT
TLE5	-0.0236006	WT
EVL	-0.0235953	WT
PCMTD1	-0.0235257	WT
ZNF66	-0.0234912	WT

## Sheet: PAX7PRE_WT_vs_MDX
Gene	baseMean	log2FoldChange	lfcSE	pvalue	padj
PAM16	3.92264	-2.27942	0.307573	8.74958e-15	3.77205e-11
MTRNR2L1	45.965	-1.29928	0.175657	1.50791e-14	3.77205e-11
ZNF506	51.1223	1.52106	0.215595	1.0345e-13	1.72521e-10
R3HDM4	6.35538	-1.71317	0.247676	2.29528e-13	2.87082e-10
RPS2	4.35328	-1.82997	0.291188	2.15765e-11	2.15894e-08
PNLIPRP3	3.69871	-1.86596	0.313948	1.18519e-10	9.88248e-08
TMA7	12.2528	-1.20846	0.204664	2.25293e-10	1.6102e-07
LYRM2	38.7685	1.2091	0.206182	3.12776e-10	1.95602e-07
CDKN2D	9.04688	-1.25871	0.228727	2.83606e-09	1.57654e-06
ACTN2	16.9356	1.44435	0.275082	1.31269e-08	6.56741e-06
HMGB1	12.9737	-1.01869	0.203706	4.04391e-08	1.83924e-05
APOF	2.88621	-2.48944	0.508454	4.58478e-08	1.91147e-05
ACTA1	27.1543	-1.01712	0.204827	5.53316e-08	2.12942e-05
C6	4.60474	-2.17546	0.433419	6.35865e-08	2.27231e-05
DDX17	20.3752	1.17485	0.241971	8.81366e-08	2.93965e-05
MICALL2	30.8238	-1.05174	0.219892	1.48178e-07	4.63333e-05
UBXN11	2.27972	-1.78127	0.388327	2.0016e-07	5.86343e-05
ZNF267	15.5847	1.20544	0.253592	2.10957e-07	5.86343e-05
TTN	20.7388	1.21497	0.26684	3.80469e-07	0.000100183
CMA1	4.61114	-2.11993	0.4592	4.74561e-07	0.000116329
MYH3	106.121	1.12014	0.25416	4.88287e-07	0.000116329
XRCC2	24.9593	0.911625	0.209372	1.14649e-06	0.000260722
C4orf46	22.9166	0.955625	0.223259	1.9603e-06	0.000426408
MTRNR2L10	49.0814	1.33674	0.342732	2.90913e-06	0.000606432
TNFAIP8	17.5941	1.10619	0.272783	3.73331e-06	0.000747109
PITX1	4.52591	-1.34744	0.341045	4.13885e-06	0.00079641
CKB	4.32758	-1.40406	0.357951	4.81865e-06	0.000892878
ZNF540	12.9842	1.0469	0.260657	5.80838e-06	0.00103783
ZYX	3.95641	-1.56485	0.413937	7.7715e-06	0.00134072
IGHG3	2.47112	-1.45177	0.392234	8.24997e-06	0.00137582
CACNA1I	2.10186	-1.99319	0.540966	8.71869e-06	0.00140708
SP7	10.7369	-1.10739	0.294044	1.27739e-05	0.00199713
MZT2B	5.99703	2.05285	0.533816	1.39872e-05	0.00212055
MYL1	22.7825	0.955315	0.258747	1.48325e-05	0.00218257
ARHGAP26	4.60355	-1.34556	0.361166	1.565e-05	0.00221044
COL1A2	162.156	-0.565332	0.146319	1.59056e-05	0.00221044
H2BC10	2.47303	-1.6773	0.48059	1.82607e-05	0.00244681
SLC35D2	2.04867	-1.51214	0.436167	1.85846e-05	0.00244681
TRAF3IP1	3.19614	-1.25534	0.354197	1.96188e-05	0.00251674
ZNF106	11.0201	1.23144	0.345297	2.40108e-05	0.00300316
RASL10A	8.47384	1.31219	0.364534	2.82781e-05	0.00342193
TRPC4AP	3.18053	-1.51767	0.447977	2.8727e-05	0.00342193
ZNF383	21.8692	0.8864	0.251635	3.18587e-05	0.00370672
FOXG1	2.4668	-1.7665	0.529447	3.37089e-05	0.00383286
RHBG	1.96393	-1.64165	0.479529	3.79524e-05	0.00421946
ZNF140	53.5791	0.767803	0.221698	3.92467e-05	0.00426851
FGD5	2.62411	-1.57604	0.484355	4.47496e-05	0.00476345
PMFBP1	2.44473	-1.5403	0.483054	5.09835e-05	0.00531397
KCNG2	1.88022	-1.58013	0.508516	5.77851e-05	0.00589998
METTL22	2.68551	-1.65557	0.525247	6.10949e-05	0.00611316
MB	5.82401	-0.976116	0.300957	6.62926e-05	0.00650317
SPATA31A6	2.6869	-1.2484	0.403571	7.26112e-05	0.00698603
PRSS3	2.89694	-0.148532	0.254656	7.43081e-05	0.00701441
NUDT3	1.95208	-1.64798	0.519354	8.25935e-05	0.00751795
NOTCH3	6.49016	-0.911954	0.286149	8.28079e-05	0.00751795
COL1A1	46.4362	-0.69574	0.208201	8.41505e-05	0.00751795
NEB	13.0149	0.875798	0.270345	9.59466e-05	0.00831202
ZFP37	10.4129	0.943211	0.287987	9.79789e-05	0.00831202
GET3	2.00963	-1.47224	0.479504	9.80231e-05	0.00831202
ACTR10	3.991	-1.12196	0.368201	0.000101094	0.00842959
RPLP1	3.84052	-1.30875	0.424665	0.000104474	0.00856862
CXCL14	2.23777	-1.52547	0.518805	0.000121639	0.0098155
COL6A1	22.8728	0.746198	0.235455	0.000134448	0.0106769
PTBP1	10.754	-0.675169	0.215851	0.00013718	0.0107236
TESC	14.5901	0.753604	0.237582	0.000155081	0.0119364
CRMP1	3.50612	-1.36001	0.47585	0.000173029	0.0129373
CKM	10.0942	-0.771203	0.254984	0.000173256	0.0129373
PHF2	2.17176	-1.22969	0.452559	0.000214298	0.0157666
IGFBP2	3.82098	-0.979433	0.350277	0.000226162	0.0163983
MAGEA3	14.6263	0.810586	0.273514	0.000234041	0.0167272
SYNE3	2.03532	-1.23594	0.460739	0.000241554	0.017021
ANKRD36B	20.4305	-0.555939	0.181924	0.000256017	0.0177896
HGF	13.6551	0.730523	0.246604	0.000304685	0.0208813
ALOX5AP	2.4657	-1.28955	0.491368	0.000314529	0.0212647
NECTIN1	4.70846	-1.21468	0.427264	0.000338946	0.022515
SLC41A1	2.72691	-1.32396	0.502652	0.000342389	0.022515
NBPF14	8.19773	0.967315	0.341097	0.000346522	0.022515
ZNF622	2.2057	-1.38649	0.514723	0.000370929	0.0237918
NREP	9.55362	1.03114	0.379665	0.000451893	0.0285614
LRCH4	2.20916	-1.1854	0.459755	0.000456709	0.0285614
AP2M1	3.10228	-1.00372	0.38666	0.000503892	0.0311231
MYBPC1	8.36943	0.967233	0.361493	0.000522424	0.0318743
MFGE8	2.81461	-1.20499	0.498037	0.00054199	0.0325573
CFAP99	1.78544	-1.20952	0.507534	0.000546634	0.0325573
MPP5	2.40651	-1.28912	0.535495	0.000564498	0.0330493
RPL18	5.51835	-0.762483	0.295421	0.000568491	0.0330493
GNRH2	1.69948	-1.27832	0.540922	0.000574712	0.0330493
COL15A1	5.34587	1.32936	0.498634	0.000595724	0.0338683
MACROH2A1	2.12251	-1.11159	0.479508	0.000626121	0.034811
H4C15	3.05872	-0.982182	0.40171	0.000626223	0.034811
OLFML2A	7.21316	0.969909	0.372731	0.000648957	0.0354356
GNA15	10.6734	0.937132	0.365963	0.000651624	0.0354356
SSMEM1	2.47278	-1.02224	0.440079	0.000660734	0.0355447
RPL23	3.93401	-0.95149	0.401083	0.000693838	0.0369284
MRPL41	1.55743	-1.24181	0.558197	0.000728594	0.0383701
HSP90AB1	11.9671	0.682359	0.256473	0.000798573	0.0416173
IGF2	72.0227	-0.474156	0.169133	0.000826264	0.0426165
FSCN1	2.61147	-0.997359	0.438615	0.000840251	0.0426509
AEBP1	5.02597	1.17169	0.451573	0.000843982	0.0426509
NRBP2	2.35992	-1.01826	0.446536	0.000856201	0.0428357
PXDN	8.58208	0.949322	0.383047	0.000897792	0.0442257
THBS4	8.85506	1.18276	0.516996	0.000901663	0.0442257
FAM13B	25.424	0.674195	0.270274	0.000943435	0.0458253
RARRES2	1.85956	-1.12063	0.511326	0.000961579	0.0462575
FGD3	2.97215	-0.923785	0.407598	0.00101974	0.0485883
LENG1	39.1273	-0.441162	0.1594	0.00102977	0.0486034
FN1	10.2856	0.888439	0.372687	0.00106497	0.0497949
CYBA	2.60403	-1.20716	0.555892	0.00107925	0.0499952
ANGPTL2	1.75526	-1.10598	0.529346	0.00111344	0.0511059
GNAS	7.80615	-0.687102	0.286795	0.00118197	0.0537583
LAMB1	7.17043	0.92496	0.383686	0.00119816	0.0540035
NAT9	2.61369	-0.948624	0.45201	0.00126907	0.0566014
HPS1	2.3702	-0.977528	0.454309	0.00127843	0.0566014
MYO18A	2.15459	-0.983383	0.469211	0.00132907	0.0583275
DAD1	2.22668	-1.03713	0.487979	0.00143168	0.0622845
TJAP1	2.18887	-0.978215	0.484334	0.00145991	0.0629651
DMWD	3.39208	-0.786632	0.374661	0.00156347	0.066855
COL4A1	14.1066	0.690771	0.302793	0.00161304	0.0683901
ACTA2	8.12748	0.837409	0.366038	0.00168004	0.0706324
DMPK	4.72385	-0.701963	0.322052	0.00172937	0.0717135
PSORS1C1	1.83301	-1.13745	0.619062	0.00173443	0.0717135
SLC4A2	2.43895	-1.11188	0.530079	0.00178075	0.0730252
CRIP2	4.4664	-0.736087	0.356997	0.00204679	0.0830325
HTRA3	1.68379	-1.05006	0.58136	0.00205797	0.0830325
RBM42	2.81874	-0.874948	0.445862	0.00208204	0.0833314
MAZ	14.9694	0.620434	0.2735	0.0021023	0.0834748
HELZ	1.83158	-0.950659	0.542315	0.00224277	0.0878969
NCOA1	4.42138	1.19464	0.573794	0.00226123	0.0878969
PRELID3B	13.5283	-0.486584	0.204653	0.00228664	0.0878969
NDST2	2.04446	-1.10372	0.639105	0.00229843	0.0878969
FBL	2.75178	-0.842517	0.433998	0.00230305	0.0878969
CANX	5.26839	0.909422	0.413832	0.00234159	0.0878969
MIDN	2.87654	-0.832765	0.456566	0.00234873	0.0878969
SIPA1L3	2.28793	-0.865625	0.480458	0.00235422	0.0878969
TRAPPC3	2.00281	-0.921184	0.530174	0.0023869	0.0884567
HSD17B3	2.20906	-0.908415	0.516246	0.0024259	0.089241
PABPC1	3.92253	-0.748187	0.386896	0.00254992	0.0931186
THAP10	1.68848	-1.00316	0.633418	0.00257498	0.0933525
ZNF587	23.7484	0.421706	0.171117	0.00264914	0.0953501
SAMD9L	1.8703	-0.988993	0.592173	0.00311265	0.111233
ATXN10	3.16205	-0.742724	0.431404	0.00320074	0.11357
EPN1	2.38224	-0.798569	0.479277	0.00335098	0.118063
GP1BB	2.13054	-0.882686	0.572627	0.00343141	0.119794
EBI3	7.21098	-0.613817	0.310237	0.003448	0.119794
MICOS13	1.92583	-0.856937	0.547961	0.00365396	0.126074
ETV3	29.3435	0.406027	0.17447	0.00369698	0.126685
SMYD1	3.89074	1.02069	0.534506	0.0037295	0.12693
SNN	2.14019	-0.877453	0.52544	0.00377146	0.127491
NRBP1	4.30919	-0.662519	0.366447	0.00387603	0.129458
STARD4	2.1703	-0.8014	0.513496	0.00389255	0.129458
KRT28	11.7207	-0.496145	0.234308	0.0039073	0.129458
SLC25A19	9.94221	0.657558	0.331496	0.00394416	0.12982
SMIM23	1.96234	-0.849577	0.577299	0.00399762	0.130548
ZNF729	2.95823	-0.940277	0.599161	0.00401848	0.130548
BAIAP2L2	1.90243	-0.963051	0.589602	0.00413309	0.133406
RAB7A	2.8203	-0.0922604	0.218394	0.00422038	0.13535
ARHGAP23	2.69859	-0.735457	0.467029	0.00432781	0.137911
DNAJC11	2.65366	-0.825702	0.572534	0.00439761	0.138919
RAD23B	13.613	0.500906	0.23595	0.00441496	0.138919
PCBP1	5.98856	0.735968	0.3877	0.0044868	0.140297
ARRDC1	9.75496	0.59499	0.301868	0.00455306	0.141484
MYH1	4.44845	-0.610375	0.350528	0.00466822	0.144167
RPS25	2.41785	-0.812584	0.543492	0.00488721	0.150004
NPHS2	2.40964	-0.775218	0.508366	0.00496018	0.151316
CHD4	6.15041	0.766901	0.443956	0.00506034	0.153436
STOX2	4.31331	0.866541	0.483935	0.00516972	0.155235
MEF2D	2.2314	-0.725498	0.514459	0.00518175	0.155235
S100A4	3.07942	-0.689584	0.449276	0.00522525	0.155607
THOP1	1.96226	-0.803636	0.632642	0.00526264	0.155793
TNNT1	19.6358	-0.516816	0.259899	0.00530737	0.156193
ZNF346	5.95259	-0.603794	0.342177	0.00540291	0.158075
XBP1	2.28776	-0.741429	0.523384	0.00553366	0.1609
CLEC11A	1.88449	-0.763517	0.594879	0.00556381	0.1609
UBE2Z	18.035	0.477083	0.233595	0.00561339	0.161189
RAB20	2.55242	-0.720497	0.476477	0.00563822	0.161189
ITM2A	4.46912	0.814367	0.477343	0.0060642	0.172382
PAFAH1B2	3.5475	-0.658946	0.442262	0.00612533	0.173136
MYL9	24.068	0.496388	0.270884	0.00666936	0.187454
COL5A1	20.6409	0.455853	0.235678	0.00704831	0.195486
AHCY	2.25456	-0.669166	0.535958	0.00706019	0.195486
BASP1	12.1398	-0.482768	0.256222	0.00707235	0.195486
PIN1	1.89721	-0.732974	0.636512	0.00743647	0.204421
COL6A6	4.35144	0.793491	0.522367	0.00756396	0.20679
DNAJB2	2.69102	-0.632234	0.476203	0.00769127	0.209127
GNG5	1.65378	-0.666564	0.933305	0.0078344	0.211868
KBTBD11	1.67393	-0.687318	0.669277	0.00789155	0.212266
ZNF334	5.70557	0.66941	0.426407	0.00793826	0.21238
FLNC	6.40832	-0.539316	0.329436	0.00804024	0.213964
COX8A	3.0414	-0.589773	0.45817	0.00844447	0.223533
ZFP36L1	6.67672	0.610391	0.376611	0.00853531	0.224748
PLAGL1	7.04798	0.596878	0.360444	0.00869748	0.227819
RPL7A	9.31402	-0.499666	0.290415	0.00875776	0.228204
KDM4E	3.05251	-0.603864	0.435784	0.00891814	0.22866
DCAKD	2.78844	-0.71797	0.55306	0.00892695	0.22866
DUX5	35.0881	0.332332	0.155975	0.00892923	0.22866
RPRD1B	11.9009	-0.404819	0.214622	0.00896946	0.22866
C4B	2.48026	-0.602787	0.502821	0.00903204	0.22866
MYH7B	3.51433	-0.656769	0.516112	0.0090495	0.22866
CA3	8.0747	0.586148	0.370322	0.009157	0.230182
OR4C3	2.26721	-0.692046	0.57997	0.00920174	0.230182
JPT2	2.47208	-0.656857	0.55029	0.00928492	0.231107
HECTD1	3.25662	-0.631449	0.534182	0.00939368	0.232656
ERI3	2.06765	-0.684142	0.597711	0.00952294	0.234696
ZFAND3	4.92112	0.663488	0.435275	0.00968505	0.237521
PTPRR	1.84037	-0.559765	0.85774	0.00979618	0.23897
ELOB	2.11686	-0.600456	0.650229	0.00984988	0.23897
PTPN12	2.98917	0.887378	0.656983	0.0098987	0.23897
RPS6KA4	2.90616	-0.598793	0.54436	0.0100133	0.23897
FAM120A	2.18806	-0.571959	0.744941	0.010044	0.23897
SRF	2.90365	-0.577464	0.466896	0.010063	0.23897
FHL1	7.30631	-0.487798	0.309704	0.0101062	0.23897
BGN	4.36411	-0.511319	0.351763	0.0101572	0.23897
SOX10	2.07347	-0.666373	0.764276	0.0102009	0.23897
TNNI3	1.92571	-0.593323	0.751527	0.0102218	0.23897
PNMA3	3.80654	-0.606681	0.464252	0.0104314	0.242737
SULF1	2.80881	-0.569649	0.501001	0.01065	0.245544
TAGLN	2.20201	-0.635986	0.695215	0.0106804	0.245544
DAPK1	3.32294	0.82137	0.616557	0.0106993	0.245544
RHOBTB3	2.74386	-0.635157	0.538626	0.010929	0.249671
ZMYM2	3.18721	0.849563	0.645413	0.0109837	0.249778
AEBP2	3.48292	0.766354	0.574564	0.0113173	0.256202
OR2T34	1.73666	-0.426598	0.93041	0.011702	0.263716
TMPO	2.46526	-0.540946	0.528692	0.0117999	0.264581
PKMYT1	4.00674	-0.497114	0.36206	0.0118535	0.264581
SLC25A11	1.96916	-0.545269	0.621261	0.011899	0.264581
FLRT1	2.65063	-0.539586	0.530552	0.0119641	0.264851
ARFGAP1	2.62195	-0.5329	0.482329	0.0122131	0.269172
CCDC107	2.63277	-0.545408	0.518056	0.0124356	0.272874
ZNF548	4.68846	-0.526473	0.422718	0.0125052	0.273203
TSPAN11	2.68878	-0.560061	0.718139	0.0126125	0.274349
RPL13	4.82142	-0.478741	0.340804	0.0128947	0.277334
HMGN2	4.88494	-0.526874	0.404805	0.0129659	0.277334
SBK1	1.80684	-0.493924	0.755954	0.0130635	0.277334
LGALS1	4.978	-0.498356	0.371462	0.0131038	0.277334
MAPT	1.8492	-0.000780525	0.197213	0.0131049	0.277334
TLE5	11.3379	0.453824	0.281651	0.0131194	0.277334
FBXO15	15.3349	0.40776	0.233826	0.0131897	0.277334
ZNF586	5.05085	0.596621	0.436697	0.013194	0.277334
OR11H6	3.08513	-0.517196	0.477396	0.0132961	0.277334
TEX48	1.37725	-0.36511	0.725065	0.0133041	0.277334
CBX6	2.64118	-0.561008	0.53356	0.0134032	0.278241
FIBP	1.72111	-0.460016	0.802385	0.0135487	0.2801
PKM	6.1498	-0.432001	0.283896	0.0137198	0.28247
CNR1	3.56389	0.686053	0.676131	0.0139473	0.284229
ATXN7L3B	2.37502	-0.577829	0.600877	0.0139523	0.284229
PIKFYVE	2.18006	-0.449615	0.821966	0.0140888	0.284229
SYP	2.6858	-0.498457	0.512815	0.0140916	0.284229
DGKQ	2.54098	-0.582867	0.596907	0.0141229	0.284229
TRIM72	2.7522	-0.504503	0.498741	0.0141461	0.284229
DIO3	3.40399	-0.510082	0.461166	0.014405	0.288272
ATP2A1	3.27742	-0.491254	0.465835	0.0145498	0.288376
HRK	2.04337	0.00299302	0.198561	0.0145681	0.288376
SFPQ	5.22695	-0.46308	0.342399	0.0145997	0.288376
ABL1	1.73438	-0.435904	0.711215	0.0146513	0.288376
WIPF3	2.73546	-0.512388	0.522899	0.0147372	0.288376
THRAP3	3.91032	0.632822	0.544214	0.014756	0.288376
SARS1	2.41934	-0.470769	0.706979	0.0148644	0.289364
CDKN1A	4.86446	0.575464	0.472159	0.0155225	0.299851
STAP2	1.84504	-0.3925	0.67964	0.0155816	0.299851
CDK6	4.24604	0.598598	0.507911	0.0155829	0.299851
UBA3	2.0556	-0.455128	0.619763	0.0156705	0.300382
MYOT	5.71898	-0.502772	0.423246	0.0157347	0.300461
WNT10A	4.28099	-0.462769	0.37053	0.0157984	0.300531
COIL	1.88096	-0.395993	0.691173	0.0161073	0.304755
SDC3	3.72126	-0.556174	0.522237	0.016207	0.304755
GATD3A	2.04023	-0.426787	0.634018	0.0162283	0.304755
WNK1	3.25007	0.648589	0.624047	0.0163143	0.304755
ACTN4	3.57682	-0.468319	0.424709	0.0163997	0.304755
ZNF17	1.97904	-0.414776	0.659333	0.0164455	0.304755
CDK12	2.95527	-0.492315	0.473098	0.0164469	0.304755
RPL27A	6.04735	-0.451967	0.341743	0.0166329	0.306658
TMEM132A	2.44546	-0.46973	0.533244	0.0167216	0.306658
NDUFA1	2.46708	-0.441682	0.556479	0.0167964	0.306658
RPL37A	11.3736	-0.402881	0.261325	0.0168034	0.306658
TRIM51	7.92207	-0.44654	0.30896	0.0168561	0.306658
MPST	1.74818	-0.387098	0.639506	0.0170825	0.30965
SEMA6B	3.64085	-0.456333	0.412851	0.0175153	0.31635
PDAP1	2.29173	-0.420917	0.571374	0.0176873	0.318308
C10orf71	1.53347	-0.363838	0.624227	0.0179495	0.321868
TNFRSF13B	2.24855	-0.345299	0.585965	0.0183504	0.327252
RNF113A	6.53488	0.474372	0.340382	0.0183805	0.327252
H4C13	3.07618	-0.450451	0.454189	0.0184847	0.32794
ZNF730	1.74632	-0.390913	0.627328	0.0186359	0.329454
ANO2	1.94347	-2.78012	0.395333	0.0193533	0.340932
MRPS14	1.86068	-0.359742	0.580336	0.0195432	0.341852
C4orf54	4.31339	0.526581	0.527693	0.0195674	0.341852
FBXL19	2.49748	-0.418033	0.497974	0.0196657	0.341852
DNMT3A	2.55377	-0.43168	0.467937	0.0197987	0.341852
GTF2I	4.91331	0.506582	0.420593	0.0198007	0.341852
SETD7	5.54003	0.488766	0.397783	0.0198155	0.341852
MAP2K2	2.18096	-0.395787	0.561075	0.0200936	0.345089
SCARB2	3.84967	-0.201515	0.246561	0.0201411	0.345089
RPL12	3.19277	-0.418201	0.423383	0.0202472	0.345222
EIF4EBP2	3.54507	0.565284	0.564996	0.0202869	0.345222
RANBP2	2.51705	-0.416079	0.480498	0.0205952	0.34928
IFT20	2.39048	-0.348398	0.560851	0.0209944	0.354849
RPS29	2.64908	-0.420375	0.471804	0.02108	0.355094
ABCD3	2.14531	-0.406375	0.545467	0.0213903	0.359113
EPC1	9.07491	0.411031	0.284595	0.021515	0.359998
GOLGA8S	1.94735	-0.356754	0.566017	0.0219851	0.365965
PDLIM3	5.88953	-0.399585	0.311577	0.0220294	0.365965
RPL26	5.02761	-0.423588	0.35836	0.0221226	0.365965
FAM155B	1.66398	-0.326854	0.532958	0.0222507	0.365965
DKK1	2.9464	-0.421212	0.490913	0.022277	0.365965
SCARF2	2.60916	-0.43545	0.525123	0.0223105	0.365965
SLC38A2	5.00825	0.475482	0.414352	0.0226049	0.369583
CLCN5	3.14915	0.536132	0.608996	0.0227436	0.37064
ATP6V0B	2.6238	-0.380779	0.48534	0.0230756	0.374829
QRICH1	2.2631	-0.379655	0.50155	0.023211	0.375808
MED10	1.79849	-0.333399	0.521483	0.0235183	0.378014
RPL41	8.71281	-0.356185	0.243091	0.0235409	0.378014
CAPN15	3.95936	0.498923	0.501713	0.0235765	0.378014
VGLL3	3.51826	0.501804	0.545429	0.0236495	0.378014
LENG8	11.3724	0.364339	0.236675	0.0239734	0.379515
CHMP6	3.14063	-0.39119	0.467688	0.0240639	0.379515
TP53INP2	2.53946	-0.373082	0.463353	0.0240715	0.379515
CCDC153	2.34484	-0.388112	0.510465	0.0240715	0.379515
RPL19	7.1734	-0.402608	0.329776	0.0241227	0.379515
MORF4L1	6.81878	0.394415	0.551751	0.0245979	0.383733
B3GNT7	2.10715	-0.306274	0.493437	0.0247211	0.383733
ZDHHC3	2.68513	-0.435776	0.56796	0.0248181	0.383733
RNASEH2C	2.07186	-0.330639	0.490854	0.0248605	0.383733
PLCE1	3.28158	-0.443185	0.516807	0.0249413	0.383733
MAPK1	3.05719	0.47643	0.678143	0.0249496	0.383733
NFIB	4.44469	0.470704	0.496936	0.0249851	0.383733
HOXB2	1.76918	-0.281707	0.448942	0.0250044	0.383733
ITM2B	5.88721	0.43984	0.372975	0.0251068	0.384127
SEPTIN8	3.18504	0.482951	0.609484	0.0254143	0.387646
POLDIP3	1.95787	-0.323426	0.491839	0.0256228	0.389638
METTL5	2.57085	-0.364001	0.464389	0.0257142	0.389843
USP19	2.67875	-0.394619	0.465247	0.0258408	0.390579
PARP14	2.60263	-0.357287	0.465122	0.026007	0.391779
NPIPB6	7.74079	0.403727	0.308422	0.0260768	0.391779
LAMA2	5.27889	0.437583	0.401174	0.0268248	0.401512
SPATS2L	5.64878	0.429015	0.374951	0.0268852	0.401512
CD248	1.467	-0.246586	0.402833	0.0271405	0.403161
TNNT2	2.51094	-0.363259	0.4636	0.0271829	0.403161
SH3PXD2B	2.41453	-0.368745	0.53551	0.0272373	0.403161
UHRF1BP1	2.11568	-0.313182	0.46028	0.0274519	0.405138
CTNNB1	5.93662	0.400938	0.538136	0.0275671	0.405642
TSC2	2.05243	-0.325008	0.479645	0.0276787	0.406089
CDH11	2.99858	-0.369115	0.43394	0.0279927	0.409495
HMGA2	1.95398	-0.317669	0.466007	0.028287	0.412594
NUDT13	2.31804	-0.345325	0.552696	0.0286658	0.415073
GABRR2	2.12811	-0.323731	0.480544	0.0287776	0.415073
CENPM	1.55832	-0.269056	0.431085	0.028799	0.415073
GUCD1	4.01747	0.433958	0.477826	0.0289663	0.415073
PLEC	12.2015	0.347125	0.239428	0.0290335	0.415073
PGAM2	1.97522	-0.281494	0.43362	0.0293139	0.415073
DEXI	2.3949	-0.347025	0.441785	0.0293483	0.415073
LSM7	2.13003	-0.315636	0.456865	0.0293647	0.415073
CORO1C	2.98944	0.444454	0.597916	0.0294062	0.415073
DPYSL3	3.16679	0.42148	0.576502	0.0294914	0.415073
CCDC8	6.89861	0.396212	0.333962	0.0296009	0.415073
BMPR1A	2.23129	-0.321354	0.481871	0.0296257	0.415073
UBR4	3.74591	0.416162	0.532676	0.0296679	0.415073
PDE7A	22.4031	0.294564	0.180178	0.0297026	0.415073
CEP55	3.24255	-0.35787	0.394741	0.0297933	0.415073
TPRA1	2.75499	-0.345154	0.418271	0.0298649	0.415073
PIGQ	1.80401	-0.299029	0.449712	0.0299323	0.415073
KIFC1	2.37978	-0.319034	0.450039	0.0299503	0.415073
TTC3	3.63592	0.435157	0.48766	0.0300827	0.415356
SMN1	2.08555	-0.299013	0.437829	0.0301368	0.415356
ATP2B4	4.87626	0.418798	0.416583	0.0303118	0.41662
ITGA6	2.29279	-0.282384	0.426946	0.0305916	0.418577
ARHGEF2	2.4361	-0.336457	0.44416	0.0306215	0.418577
PHLDA3	2.19407	-0.302983	0.440211	0.0310031	0.421641
SEMA6A	2.97444	0.422223	0.576587	0.031047	0.421641
PTP4A3	7.82361	0.370438	0.27936	0.0310984	0.421641
LUM	1.65491	-0.254116	0.401944	0.0314851	0.42573
CSTF2T	2.2176	-0.321489	0.462538	0.0321099	0.429684
SLC16A3	1.72182	-0.259201	0.403649	0.0321422	0.429684
GYS1	3.48941	0.412695	0.489933	0.0321547	0.429684
VASH2	4.88612	0.239304	0.388242	0.0322329	0.429684
ARHGEF40	3.79115	0.39662	0.50261	0.0322333	0.429684
IFITM2	13.5548	-0.304965	0.20267	0.0322928	0.429684
DZIP1L	3.12105	-0.340332	0.393673	0.0326996	0.433499
DELE1	3.61065	-0.349145	0.36577	0.0327528	0.433499
WFS1	1.79204	-0.241388	0.382779	0.0328686	0.433883
DDX4	7.03235	0.217408	0.36251	0.0332314	0.437518
ZFP90	2.04539	-0.273918	0.409512	0.0337717	0.442963
UPF3A	2.80071	0.383617	0.549562	0.0338221	0.442963
PCID2	3.79084	-0.339899	0.358313	0.0341668	0.446309
FOXO6	1.91652	-0.287279	0.422374	0.0343544	0.447591
SH3YL1	3.3934	-0.335539	0.378676	0.0350861	0.455937
CYP4Z1	2.80601	-0.328635	0.418495	0.035224	0.456543
PUS10	2.25645	-0.304012	0.447543	0.0357005	0.458407
ZNF454	3.59384	0.386355	0.473124	0.0357123	0.458407
LETM1	1.61664	-0.250244	0.389924	0.0359342	0.458407
IFRD2	2.90645	-0.319549	0.391797	0.0359671	0.458407
H3C7	2.92501	-0.314386	0.39947	0.0359776	0.458407
CDK2AP1	4.11743	-0.337049	0.33766	0.0362327	0.458407
MIDEAS	4.7031	-0.333436	0.325976	0.0364373	0.458407
CAP2	2.91552	0.359621	0.503116	0.0364917	0.458407
GATD1	2.28377	-0.298546	0.421539	0.0365178	0.458407
ECHDC2	3.41243	0.384927	0.465691	0.0367291	0.458407
CERKL	2.19459	-0.270566	0.401346	0.0367627	0.458407
NUP160	2.08206	-0.253499	0.382224	0.0368962	0.458407
ZNF764	2.28824	-0.277971	0.405419	0.0369678	0.458407
LNPEP	3.80526	0.35971	0.462372	0.0371075	0.458407
GNB2	2.96214	-0.312988	0.385678	0.0371396	0.458407
PPIH	1.86687	-0.268761	0.397771	0.0372003	0.458407
SLC2A5	2.27418	-0.285407	0.405285	0.0372186	0.458407
NEBL	3.25005	0.352871	0.481751	0.0372474	0.458407
SPIN2B	2.59053	-0.307317	0.40411	0.0372972	0.458407
DNASE1L1	2.01084	-0.273232	0.399989	0.0373329	0.458407
PGM3	2.6867	-0.263215	0.396949	0.0373918	0.458407
ZNF260	3.44381	0.376578	0.465942	0.0374695	0.458407
SMIM4	1.73845	-0.25988	0.39891	0.0377402	0.458407
WRAP53	1.95828	-0.253724	0.396836	0.0377487	0.458407
SETD5	4.09387	0.37377	0.432562	0.0377561	0.458407
H2AB1	1.40379	-0.221769	0.35887	0.0377628	0.458407
LCMT2	2.14341	-0.274386	0.391147	0.0379534	0.458407
AMACR	3.53953	0.218546	0.359675	0.0379916	0.458407
LDHB	7.22909	0.353694	0.318249	0.038025	0.458407
TUBA1C	22.494	-0.302294	0.210018	0.0381755	0.459115
KRTAP12-3	2.26623	-0.280944	0.400441	0.0383404	0.459893
EIF4A1	4.11893	-0.33017	0.331435	0.038424	0.459893
RNF14	1.79757	-0.249638	0.381144	0.0385394	0.460174
PIGR	1.74251	-0.0199125	0.201035	0.0386576	0.460485
HCRTR2	1.79269	-0.241957	0.375403	0.0389107	0.461123
SPARCL1	9.72527	0.342917	0.335978	0.0390379	0.461123
KIAA0754	3.35973	0.361038	0.458114	0.039057	0.461123
MYADM	5.36509	0.365564	0.36512	0.0390798	0.461123
GPRIN1	2.28753	-0.242688	0.3715	0.0393053	0.462693
TMEM50B	10.4224	0.330975	0.265229	0.0397358	0.466663
CDC37	3.55172	-0.308674	0.366346	0.0400374	0.469103
SNHG32	3.70911	0.362303	0.427904	0.0401908	0.469801
TNNT3	12.933	0.323245	0.257129	0.0403802	0.470047
COPS7A	2.27164	-0.292112	0.404128	0.0405097	0.470047
NDUFAB1	2.06164	-0.252219	0.375437	0.040548	0.470047
TFG	4.88796	0.360472	0.370076	0.0405877	0.470047
VSIG8	3.59921	-0.315894	0.341144	0.0410032	0.472217
DAG1	4.64098	0.360364	0.388439	0.0410043	0.472217
SFRP2	1.84376	-0.264505	0.391511	0.041123	0.472217
RPS21	2.5491	-0.29057	0.383423	0.0411743	0.472217
ABCG1	3.02934	0.238989	0.380484	0.041247	0.472217
MKI67	2.75367	-0.292743	0.378439	0.0415317	0.474391
EHD1	2.97728	-0.301486	0.381592	0.0416296	0.474425
MICOS10	2.6449	-0.260165	0.378607	0.0417952	0.474715
ATP5F1D	2.10333	-0.257251	0.376139	0.0419203	0.474715
CD44	5.13808	0.307668	0.417517	0.0419396	0.474715
SLC25A52	3.4706	-0.309488	0.380973	0.0423158	0.476977
SERPINE1	1.67001	-0.219212	0.34723	0.0423302	0.476977
MAP2K1	4.3969	0.335635	0.413547	0.0425212	0.478053
SGPP1	2.03533	-0.232853	0.355535	0.0428002	0.479309
ZNF493	9.83075	0.32555	0.26984	0.0428679	0.479309
KLF8	1.51804	-0.221642	0.352827	0.0429204	0.479309
SPIN2A	3.41689	-0.298265	0.36303	0.043027	0.479431
CCDC97	2.99897	-0.277828	0.369508	0.0431682	0.479934
SLC22A23	1.88868	-0.227731	0.352705	0.0434907	0.482448
CHPF	3.55508	-0.313119	0.366326	0.0436199	0.48281
CHID1	1.85068	-0.235217	0.358204	0.0437719	0.483424
ZNF655	2.7668	-0.28376	0.380772	0.0443799	0.488343
MYL12A	3.60079	0.344635	0.413436	0.0444126	0.488343
TVP23B	2.66994	-0.269228	0.369277	0.045244	0.496394
FOXK1	1.96899	-0.231222	0.352589	0.0455876	0.49907
GPR27	1.95235	-0.209964	0.335548	0.0457719	0.499993
ADAMTS14	2.08696	-0.244812	0.360511	0.0463534	0.50431
ACE	2.74764	-0.239764	0.359504	0.0463687	0.50431
CFHR3	2.75674	0.292232	0.425016	0.0466632	0.506412
OST4	2.4071	-0.239531	0.356398	0.0472515	0.510272
KDM4B	3.07492	-0.286077	0.367286	0.047298	0.510272
NDEL1	3.13484	0.292661	0.416749	0.0474381	0.510272
RPS4Y1	2.68464	-0.275811	0.360031	0.0475467	0.510272
ATP2A3	2.27081	-0.252876	0.357712	0.0476607	0.510272
BMERB1	4.8103	-0.301371	0.311497	0.0476837	0.510272
CTSK	2.13035	-0.222708	0.342272	0.0477328	0.510272
TEAD3	2.16898	-0.227606	0.344579	0.0478451	0.510382
CDKN1C	5.68992	0.330589	0.315988	0.0482698	0.513817
PFN1	4.01222	-0.295403	0.368382	0.0486882	0.51717
TCIM	2.60966	-0.257231	0.354807	0.0490297	0.519054
LRTM2	1.87644	-0.232668	0.353955	0.0491325	0.519054
TPM2	22.4186	-0.291958	0.228079	0.0491951	0.519054
IGFBP4	3.11999	-0.283789	0.350686	0.0492805	0.519054
MXD4	4.19168	0.325816	0.377635	0.0494581	0.519241
SEPTIN7	4.48129	0.328182	0.356724	0.0495059	0.519241
ITPKB	1.99122	-0.226034	0.34708	0.0498417	0.52091
ATP1B1	3.14806	-0.276261	0.349547	0.0499257	0.52091
SHC1	2.17026	-0.244054	0.356954	0.0500667	0.52091
SGCD	3.92161	0.32475	0.378367	0.0500815	0.52091
EIF3E	3.35072	0.298804	0.395475	0.0508364	0.5268
RPL7L1	3.24211	0.287085	0.396182	0.0508816	0.5268
WASHC1	4.6988	-0.292925	0.298352	0.0509636	0.5268
SORBS3	1.96308	-0.231962	0.344875	0.0513147	0.529335
OSBPL2	4.01662	0.307558	0.380618	0.0518102	0.531986
WASF2	2.51456	0.267346	0.395737	0.0519063	0.531986
UFM1	3.32219	0.288878	0.394669	0.0519883	0.531986
NUDT21	2.35741	-0.241507	0.343261	0.051997	0.531986
GIT1	1.96578	0.0416373	0.199551	0.0522442	0.532226
POU5F1	5.69026	-0.286238	0.279022	0.0524591	0.532226
HNRNPR	4.90055	0.304053	0.35113	0.0524787	0.532226
UROD	2.20994	-0.243171	0.347015	0.0525536	0.532226
ZNF574	6.09429	0.309985	0.334997	0.0527053	0.532226
NOTCH2	4.4329	0.299816	0.369211	0.0527218	0.532226
ROBO3	1.93132	-0.228638	0.343508	0.0527897	0.532226
H4C12	2.87821	-0.257653	0.352469	0.0528715	0.532226
PIK3C2A	3.08432	-0.26243	0.340634	0.053074	0.533191
TRIM38	2.0762	-0.243788	0.351924	0.053314	0.53352
RPL22	5.21426	-0.294814	0.299032	0.053464	0.53352
CPTP	3.29854	-0.272952	0.331498	0.0534792	0.53352
MGP	2.30215	-0.229204	0.340501	0.0535333	0.53352
TOR1AIP2	3.82749	-0.288673	0.313609	0.0538058	0.53517
TMEM63A	3.14592	0.28574	0.389261	0.0539173	0.535215
DNAJC8	2.36907	-0.242189	0.34844	0.0544316	0.539004
ERF	8.5256	-0.285699	0.244859	0.0545145	0.539004
RPL32	8.61636	0.298805	0.293204	0.0546313	0.539094
DHX8	2.92211	0.264989	0.380041	0.054775	0.539447
HSP90AA1	4.21272	0.218973	0.342112	0.0549876	0.540477
RDH12	1.96175	-0.213354	0.328737	0.0553626	0.543097
LAMB2	4.81677	0.227894	0.345892	0.0556916	0.544828
DTX3	2.01732	-0.236769	0.345007	0.0557576	0.544828
NAT8L	1.69362	-0.208346	0.328062	0.0559117	0.544828
MRPL55	4.3378	-0.288437	0.306064	0.0560546	0.544828
SOD2	2.06661	-0.229856	0.342017	0.0561737	0.544828
ZIC3	3.04659	-0.269586	0.36034	0.0561926	0.544828
TIMP2	3.10482	-0.253588	0.334544	0.0564083	0.545862
MSL1	4.30227	0.303341	0.347434	0.0570516	0.551021
TGFB3	3.48755	-0.269811	0.31752	0.0574221	0.553531
GLS	1.86463	-0.217121	0.332105	0.0576618	0.554773
LDB3	4.88626	0.2902	0.353399	0.0579668	0.556637
SOX4	5.57177	-0.277969	0.308973	0.0581674	0.557493
SKI	4.56952	0.29914	0.332718	0.0585305	0.5599
CARD11	6.90634	-0.288346	0.28806	0.0588542	0.561922
TNIP1	2.45943	-0.234961	0.334616	0.0591501	0.563485
FHIP1B	3.31073	0.172014	0.300845	0.0592431	0.563485
NOP53	2.37185	-0.228525	0.33043	0.0596297	0.56548
UBE2D3	2.64665	-0.2552	0.333729	0.0597842	0.56548
FNBP1L	3.23381	0.278571	0.369727	0.0599289	0.56548
FNBP4	2.89214	0.243667	0.35896	0.0600187	0.56548
VCAN	3.91206	0.288056	0.355858	0.0601459	0.56548
SMIM17	19.146	0.25971	0.198034	0.0602583	0.56548
TRAPPC2B	2.24535	-0.220261	0.333235	0.0602747	0.56548
MYL6B	12.4863	-0.269415	0.21723	0.060357	0.56548
KRT76	1.4124	-0.164255	0.291126	0.0613734	0.573089
AVEN	2.59002	-0.233181	0.327731	0.0613983	0.573089
CSNK1A1	3.63492	0.271077	0.355504	0.0616802	0.574057
NTN4	3.40368	0.257671	0.356663	0.0617604	0.574057
CACNG6	1.70448	-0.189143	0.309136	0.061877	0.574057
ADI1	2.68651	0.244712	0.35775	0.0619609	0.574057
AP3D1	3.01458	-0.249813	0.332466	0.0621602	0.574838
CCDC17	1.66189	-0.192775	0.311166	0.0622945	0.575017
ZC3H11A	3.72875	0.281946	0.351144	0.0627942	0.577157
PVRIG	2.01273	-0.207596	0.320864	0.0628039	0.577157
PKD2	2.69643	-0.237689	0.324347	0.0628724	0.577157
POU4F1	3.69383	0.179209	0.303382	0.0635011	0.579658
ZNF768	4.51276	-0.265804	0.29409	0.0636211	0.579658
AKR1A1	3.56603	0.272749	0.353255	0.0636965	0.579658
AKT1	2.31251	-0.223473	0.320816	0.0636966	0.579658
PCP2	2.16181	-0.226251	0.325165	0.0637681	0.579658
C17orf75	1.82525	-0.206245	0.317591	0.0638404	0.579658
SPEG	1.97383	-0.214472	0.320195	0.0639559	0.579658
STK25	5.44311	0.283475	0.318316	0.0641837	0.579985
CUL4B	2.06646	-0.21245	0.317658	0.0642238	0.579985
H4C4	2.0193	-0.200036	0.312188	0.0645208	0.581447
EMX1	5.95517	0.283928	0.303088	0.0646181	0.581447
TMSB4X	4.22943	-0.266738	0.298608	0.0648806	0.581756
TTYH3	10.5484	-0.270678	0.23746	0.0648851	0.581756
SELENOH	2.02512	-0.216414	0.322122	0.0651906	0.583151
GAST	2.53453	-0.236639	0.323659	0.0653858	0.583151
IDH2	3.81253	-0.257515	0.301198	0.0653904	0.583151
APH1B	2.03923	-0.20451	0.315076	0.065543	0.583472
ASXL2	2.60093	0.231058	0.343707	0.065732	0.584116
NPNT	3.40576	0.271179	0.34848	0.0659993	0.584485
CRYBB3	1.6523	-0.177538	0.297681	0.0660369	0.584485
DVL1	8.81829	-0.255538	0.213254	0.066124	0.584485
GFOD1	1.50406	-0.177967	0.299761	0.0663081	0.585078
ZNF708	2.65851	0.235073	0.34437	0.0667494	0.586147
ALG2	2.94679	-0.234729	0.3137	0.0668425	0.586147
STEAP2	1.96166	-0.200025	0.311212	0.0669381	0.586147
CSGALNACT2	2.5306	0.215023	0.332511	0.0670335	0.586147
RAC3	2.72297	-0.230893	0.324922	0.0674099	0.586147
TNFAIP3	2.22351	-0.220396	0.320376	0.0674423	0.586147
SPNS3	1.71414	-0.182985	0.300582	0.0674884	0.586147
ERCC3	1.85015	-0.199724	0.31179	0.0675459	0.586147
CNBP	2.773	-0.239799	0.316241	0.0676172	0.586147
OLFML3	7.96739	0.27921	0.291134	0.0676866	0.586147
CECR2	4.36136	-0.265008	0.3295	0.0677697	0.586147
DHRS2	2.52984	-0.225793	0.321839	0.0678509	0.586147
RPS19	3.57386	-0.24299	0.31839	0.0679522	0.586147
DHRS7	2.15829	-0.211206	0.314009	0.068224	0.587478
DHRS1	3.0595	0.0938399	0.206261	0.0683945	0.587717
RDH13	9.27531	-0.25104	0.209252	0.0684868	0.587717
IP6K2	2.73559	-0.220344	0.314374	0.0689469	0.590653
SNCA	2.92878	0.210699	0.324601	0.0692865	0.592547
TRAF3IP3	3.18698	-0.240375	0.308108	0.0695592	0.593212
KIAA1614	4.30558	-0.246813	0.307721	0.0696014	0.593212
DYNLRB1	2.22424	-0.221481	0.324887	0.0697821	0.593742
SLC12A4	3.79436	0.261448	0.336063	0.070273	0.595225
SPATC1L	1.99973	0.943901	0.45016	0.0704761	0.595225
KCNK9	1.94974	-0.181972	0.298571	0.0705766	0.595225
RANGRF	3.0264	0.248685	0.341822	0.0707075	0.595225
MYL12B	6.01963	-0.257034	0.254101	0.0707381	0.595225
TRIP6	3.22569	0.235751	0.335345	0.0707737	0.595225
NCKAP1	2.77317	0.181238	0.303575	0.0707893	0.595225
RHPN2	2.46899	-0.217882	0.310929	0.0709543	0.595611
DPF2	2.11692	-0.210941	0.311328	0.0713248	0.597718
PDGFRA	1.9936	-0.189097	0.300934	0.071919	0.601077
PREB	1.72981	0.0382896	0.201083	0.0719659	0.601077
WDR13	1.84592	-0.193621	0.305204	0.0721735	0.601807
OR7A10	1.79209	-0.189784	0.302334	0.0726571	0.604831
SF3B3	3.8668	0.247217	0.33156	0.072916	0.605978
CACNB3	1.96468	-0.202522	0.308211	0.0730506	0.60609
MGAT5	2.81807	0.22902	0.332384	0.073385	0.606737
PLOD1	5.83037	-0.251965	0.280666	0.0735237	0.606737
SFXN1	1.8794	-0.191862	0.302775	0.0735888	0.606737
EIF1B	2.21804	-0.21447	0.312704	0.0736137	0.606737
GOLGA8A	12.9071	-0.25559	0.238115	0.0744072	0.611392
COMT	1.7243	-0.177675	0.294172	0.0744229	0.611392
ACOT1	1.8956	-0.184661	0.296424	0.0751036	0.615948
KDM4D	2.33198	-0.184331	0.305182	0.0752237	0.615948
PPP3CB	3.12119	0.204917	0.316006	0.075762	0.616735
PLEKHM1	1.75269	-0.186783	0.298517	0.0758101	0.616735
PCDH12	1.44686	-0.166281	0.287475	0.0758462	0.616735
CCN1	2.42296	-0.195683	0.300864	0.075974	0.616735
ARSF	2.41493	-0.20648	0.304907	0.0759868	0.616735
TMEM131L	2.96669	0.230525	0.32942	0.0761414	0.616735
KLHL40	2.45457	-0.213279	0.307545	0.0761828	0.616735
IL17RD	2.49591	-0.195828	0.299377	0.0765366	0.617438
ZNF836	2.5615	0.21352	0.321909	0.0766234	0.617438
NAT8	2.67834	-0.212073	0.308859	0.0766526	0.617438
COX6B1	4.08262	0.244522	0.317452	0.0768839	0.617438
RAD51B	1.60912	-0.168394	0.287669	0.0769826	0.617438
SPATA20	2.80371	-0.219903	0.30723	0.0770689	0.617438
SPRY2	2.72369	-0.222175	0.299669	0.0772576	0.617438
CCT2	3.02257	0.225737	0.324379	0.0773355	0.617438
ORAI2	2.03249	-0.191966	0.299604	0.0773803	0.617438
ZNF354C	4.157	0.253725	0.314222	0.0777498	0.619332
TUBB2B	3.62412	-0.231143	0.294661	0.0779743	0.619332
MAT2A	3.61784	0.227819	0.320371	0.0781416	0.619332
PITPNB	2.79346	0.235656	0.329057	0.0781535	0.619332
SLC25A3	4.5664	-0.238142	0.294646	0.0783516	0.619332
CMBL	1.44381	-0.152469	0.277985	0.0785347	0.619332
DBN1	4.17257	-0.242757	0.282518	0.0785972	0.619332
ZNF391	9.88356	0.252579	0.235575	0.0788199	0.619332
PIK3R2	2.27556	-0.200388	0.302605	0.0788215	0.619332
BATF3	2.6011	-0.208667	0.30096	0.0788556	0.619332
SNU13	2.10853	-0.00143644	0.197758	0.0793081	0.621859
FBN1	2.76796	0.220155	0.322538	0.0795121	0.621859
LHFPL2	1.85178	-0.182069	0.29342	0.0795502	0.621859
DDX19A	3.69163	0.243158	0.31709	0.0798241	0.623026
SLC35E2A	3.2843	0.235701	0.322474	0.0799572	0.623094
NUMA1	4.72287	0.254944	0.298287	0.0801611	0.623711
OR4N4	1.35324	-0.154326	0.278919	0.0807499	0.626103
ECPAS	3.62594	0.231315	0.317233	0.0807967	0.626103
SNAPC2	1.84589	-0.175048	0.289462	0.0808441	0.626103
CCNG2	3.34736	0.236101	0.319262	0.0810883	0.626322
RNF144A	2.04734	-0.194382	0.301048	0.0811619	0.626322
HNRNPM	3.1614	0.233105	0.320752	0.0812478	0.626322
ARL15	2.35418	0.206809	0.316096	0.0815282	0.627516
CCT5	3.46363	0.239297	0.318494	0.081719	0.627877
ALG12	3.22242	-0.223987	0.292727	0.082039	0.627877
CDC42EP4	2.03614	-0.192746	0.299001	0.0820838	0.627877
TET3	48.5615	0.188387	0.13002	0.0821893	0.627877
HNRNPD	5.09509	0.249094	0.299886	0.0822025	0.627877
AGRP	1.59974	-0.163723	0.283477	0.0825006	0.628238
STAU1	2.36268	0.200716	0.311481	0.0826476	0.628238
CAPN6	4.98611	0.251833	0.292826	0.0827238	0.628238
TAGLN2	3.56979	0.240679	0.315225	0.0827521	0.628238
AMOTL2	2.55301	-0.201886	0.294432	0.0832914	0.631374
TUBB	3.88925	0.239477	0.310318	0.0836895	0.633432
IMPDH2	3.13895	-0.220922	0.291886	0.0845486	0.637331
NCOR2	4.77745	0.248583	0.300562	0.0846391	0.637331
CHRNA1	5.89544	0.252513	0.274687	0.0846429	0.637331
IGFBP5	14.1165	0.242258	0.228132	0.0848266	0.637331
CFAP410	5.14783	-0.228649	0.284397	0.0848416	0.637331
SSRP1	5.39434	0.250353	0.283304	0.0857129	0.642366
DCK	4.18085	0.148589	0.275603	0.0857686	0.642366
PTPN9	1.86843	-0.166328	0.281779	0.0864613	0.646586
DNAJB6	2.51669	0.210539	0.313977	0.0869075	0.648953
NDUFB3	1.9753	-0.184328	0.290434	0.0873753	0.651473
STUB1	2.09785	-0.186125	0.289784	0.0881281	0.656109
INTS6	2.99345	0.222504	0.311499	0.0884302	0.656509
SQOR	1.38515	-0.157309	0.2788	0.0884938	0.656509
PHAX	13.1178	0.236471	0.212821	0.0886433	0.656509
RPS3	6.39204	-0.214381	0.300103	0.0887069	0.656509
DESI1	1.8918	-0.177619	0.287342	0.0890742	0.658096
BARHL2	2.55877	-0.201479	0.288856	0.0891843	0.658096
TCEAL7	3.75199	0.22261	0.303349	0.0894582	0.65833
FZD4	3.72685	0.212479	0.302	0.089741	0.65833
SRSF3	2.74156	-0.209187	0.289058	0.089893	0.65833
GOT2	2.04067	-0.174627	0.284718	0.0899666	0.65833
ST6GALNAC3	2.62624	-0.199226	0.28832	0.0901329	0.65833
MUSTN1	3.49939	-0.0300115	0.194802	0.0903154	0.65833
CRKL	1.91265	-0.178139	0.286121	0.0904182	0.65833
ARFGAP2	2.11857	-0.182472	0.289467	0.0904298	0.65833
PRMT8	185.506	-0.188077	0.134737	0.0904701	0.65833
P4HA2	2.54959	-0.198889	0.288998	0.0905319	0.65833
CYP2A6	7.35894	-0.237503	0.254318	0.0909802	0.66063
IREB2	2.23697	0.192265	0.301313	0.0912627	0.661721
KANK3	4.35147	-0.224625	0.277887	0.0919128	0.66547
UPK1B	2.29908	0.185824	0.297229	0.0921693	0.666363
PCGF5	2.52143	0.192055	0.299058	0.0923821	0.666937
MRC2	1.64971	-0.159525	0.277127	0.0927412	0.668565
RPL31	5.4925	-0.226379	0.263818	0.093151	0.670553
OLR1	2.83258	0.200902	0.300434	0.0940588	0.672821
ZEB2	3.21123	-0.171588	0.284306	0.094059	0.672821
CDC16	2.54086	0.193504	0.298831	0.0941298	0.672821
ART1	4.0371	-0.223308	0.267736	0.094221	0.672821
MYH9	6.88283	0.240463	0.256503	0.0944766	0.672821
H4C6	2.22986	-0.187977	0.286619	0.0945291	0.672821
ANXA6	5.54758	0.240747	0.268984	0.0947433	0.672821
KLF6	1.92166	-0.17463	0.282747	0.0948056	0.672821
ZNF827	3.12681	-0.19916	0.287462	0.0948525	0.672821
ADRM1	2.41061	-0.1882	0.28344	0.0949001	0.672821
RANBP9	2.51437	0.193478	0.2989	0.095246	0.672821
EWSR1	5.75557	0.233994	0.27556	0.0953876	0.672821
PRPF38B	3.33539	0.211104	0.299065	0.0953891	0.672821
PPP2CA	3.11383	0.198942	0.298396	0.0956301	0.672821
MAP3K14	1.83568	-0.16041	0.275899	0.0957693	0.672821
DOCK7	2.43752	0.195673	0.299105	0.0957815	0.672821
ZFR	2.29024	-0.177967	0.282684	0.0958192	0.672821
FOSL2	3.94812	-0.215743	0.287676	0.0959223	0.672821
BCORL1	2.34613	-0.186121	0.284542	0.0960213	0.672821
ECH1	2.16405	-0.170198	0.278841	0.0962164	0.673246
RPL37	5.57728	0.228852	0.281223	0.0964567	0.673985
SNRPD2	2.15893	0.186775	0.295664	0.096679	0.674595
ARPP21	1.91927	-0.170062	0.280703	0.096933	0.674629
PLCG1	2.89539	-0.196813	0.288759	0.0969535	0.674629
SYNGR3	1.4613	-0.149452	0.272246	0.097135	0.674953
DDX50	6.62136	0.237001	0.253938	0.0976706	0.677734
DHX9	2.7945	0.196786	0.297121	0.0978293	0.677894
UBXN7	2.71271	0.197039	0.296479	0.0990535	0.683957
CYP4X1	1.78543	-0.160075	0.275721	0.0991349	0.683957
EIF3L	2.76071	-0.182406	0.279672	0.0991627	0.683957
C12orf57	7.79576	0.227673	0.270683	0.0992871	0.683957
CCDC112	3.14355	-0.206059	0.278914	0.0993877	0.683957
DDX27	2.00015	-0.167196	0.276809	0.0996866	0.684049
RUNX3	3.38195	-0.206944	0.275399	0.0998364	0.684049
SCYL1	1.71665	-0.153647	0.271795	0.0998904	0.684049
TUBGCP2	1.69876	-0.161527	0.275732	0.100011	0.684049
NVL	1.63627	0.0516818	0.206607	0.10021	0.684049
ZNF385D	1.52606	-0.147969	0.270026	0.100343	0.684049
MDK	2.71617	-0.197967	0.281705	0.100358	0.684049
PRR29	2.33916	-0.179489	0.280693	0.100622	0.684908
SDF2L1	1.81027	-0.158534	0.273375	0.100914	0.684908
RBM4	2.33768	-0.178075	0.281243	0.100984	0.684908
PRSS54	2.59841	0.193794	0.294709	0.101032	0.684908
SARNP	1.64882	-0.152983	0.271353	0.101496	0.686141
KCNA10	2.23368	0.178111	0.288769	0.101556	0.686141
DHDH	2.19335	-0.173937	0.27925	0.101797	0.686141
CDC42EP3	3.04019	0.1986	0.293521	0.101907	0.686141
UQCR11	2.21426	-0.178905	0.27872	0.101962	0.686141
GUK1	1.95509	-0.162415	0.2743	0.102041	0.686141
DDX5	5.54628	0.224739	0.272707	0.102279	0.686141
C9orf47	2.11919	-0.17078	0.277628	0.102311	0.686141
NDUFA4	2.24746	-0.182685	0.280343	0.102898	0.686414
FXYD1	2.12226	-0.157728	0.273421	0.102919	0.686414
RPL11	1.86399	-0.162884	0.276028	0.103104	0.686414
CENPT	2.90342	-0.194269	0.284311	0.103365	0.686414
DYNC1LI2	3.09821	0.200392	0.291514	0.103628	0.686414
RFXANK	1.86807	-0.169403	0.277716	0.103731	0.686414
POLR2A	3.27327	-0.204746	0.274681	0.103747	0.686414
JAG2	1.96097	-0.16361	0.274015	0.103776	0.686414
HNRNPUL2	2.36389	-0.163599	0.274061	0.103901	0.686414
HR	2.39801	-0.18099	0.281279	0.103967	0.686414
HACL1	2.58814	0.162068	0.272783	0.103982	0.686414
KCNJ12	3.67636	-0.207	0.2819	0.103998	0.686414
GRIN2B	2.69842	-0.189637	0.278113	0.104183	0.686731
HSF2	1.89387	-0.163206	0.274119	0.104695	0.689193
ZFAND6	2.17298	0.171707	0.283975	0.105484	0.692636
MYH10	3.30359	0.192855	0.287047	0.105494	0.692636
RAB11B	3.14931	-0.195547	0.277121	0.105975	0.69394
MEF2C	3.3333	0.200805	0.28986	0.106292	0.69394
DHX15	3.03175	0.202145	0.291356	0.106356	0.69394
TMUB2	2.59598	0.171679	0.282219	0.106389	0.69394
CAPNS1	4.48315	-0.215112	0.263128	0.106417	0.69394
RIPOR1	2.27679	-0.179823	0.277258	0.106525	0.69394
POLR2E	7.35037	-0.216764	0.223315	0.106696	0.69415
PCDH11X	3.10386	0.193348	0.28804	0.107028	0.695198
APTX	2.23174	-0.164168	0.272585	0.107232	0.695198
CXXC1	2.03039	-0.171651	0.275673	0.107334	0.695198
TMEM248	2.82065	0.193712	0.288629	0.107508	0.695198
TEDC2	4.12366	-0.206988	0.275438	0.107552	0.695198
RHOV	6.67938	-0.214844	0.236446	0.108042	0.697038
GATA2	4.83709	0.222307	0.271387	0.108146	0.697038
CHTOP	3.24001	0.193267	0.286287	0.108255	0.697038
SMC1A	3.16899	0.191199	0.286093	0.108514	0.697808
RPL14	3.54324	-0.204433	0.268738	0.108893	0.699347
RNF19B	2.69344	-0.182678	0.282446	0.109299	0.701054
CYP3A4	1.49557	-0.135857	0.26206	0.109658	0.701796
TNFRSF13C	1.94419	-0.157059	0.269673	0.109756	0.701796
PHF12	2.44421	0.181773	0.285476	0.109835	0.701796
ERV3-1	2.37398	-0.179261	0.275393	0.110176	0.703076
TEDC1	2.05072	-0.164739	0.27301	0.110864	0.706073
STMN3	2.20748	-0.167245	0.271272	0.110928	0.706073
COL6A2	7.73917	-0.212694	0.241968	0.111148	0.706575
BNIP2	2.3661	-0.173155	0.272079	0.112168	0.712151
NMRK2	1.7971	-0.152094	0.267249	0.112418	0.712836
ZNF350	5.04652	0.21593	0.265084	0.112597	0.713065
DUSP1	2.91439	-0.188886	0.271018	0.112983	0.713518
SPON2	3.20766	0.185938	0.281462	0.113075	0.713518
PPIB	3.33788	-0.190455	0.267006	0.113127	0.713518
LRIG1	3.69791	0.203789	0.281062	0.113365	0.713518
PKP1	2.37676	-0.174063	0.27384	0.113381	0.713518
GADD45GIP1	1.67032	-0.152627	0.268592	0.113561	0.713748
PRR14L	1.93052	-0.15149	0.266356	0.114224	0.716168
DCAF6	2.18848	0.171579	0.280466	0.114232	0.716168
WIZ	2.39658	0.00382853	0.197327	0.114434	0.716537
DYNC1H1	19.3809	0.205602	0.183133	0.11494	0.718805
BNIP3L	3.28387	-0.193419	0.267208	0.115357	0.719755
ING4	2.60693	0.17832	0.280912	0.115379	0.719755
UBE2NL	1.80149	-0.152114	0.266713	0.115538	0.719845
APBB1	1.67605	-0.14674	0.264929	0.115804	0.71986
TTYH2	3.20787	0.163525	0.274925	0.115912	0.71986
ZNF721	3.73502	0.193911	0.277963	0.115972	0.71986
SVIL	3.39458	0.200331	0.279853	0.116212	0.72007
HMGCLL1	2.76026	-0.180181	0.270181	0.116413	0.72007
XAF1	1.92887	-0.156181	0.267807	0.11648	0.72007
VAPA	3.6987	0.117659	0.253753	0.116581	0.72007
SKIL	2.93287	1.21841	0.513705	0.116984	0.721666
LAMA4	3.15843	0.17256	0.275644	0.117461	0.722938
PLD3	3.68923	0.200371	0.278623	0.117479	0.722938
NDST1	3.07642	0.184319	0.278539	0.118004	0.724583
CARS1	1.81135	-0.146641	0.264052	0.118036	0.724583
CHCHD1	1.99647	-0.153591	0.265555	0.1187	0.724714
UBB	4.33473	0.210605	0.268719	0.118777	0.724714
SLC35E4	2.8783	0.167302	0.274354	0.118893	0.724714
SAA2	3.68681	-0.172792	0.267848	0.118898	0.724714
RASAL3	2.64185	0.160158	0.272701	0.118927	0.724714
ENAH	3.60968	0.189668	0.277	0.118927	0.724714
CES2	1.71437	-0.135186	0.259187	0.119821	0.728704
HIF1A	2.01273	-0.158413	0.267263	0.119982	0.728704
DGCR6L	3.77654	-0.19475	0.260815	0.120018	0.728704
RTN4	7.06817	0.214341	0.238377	0.120732	0.730777
MYOM3	4.48922	0.200604	0.26791	0.120873	0.730777
APIP	2.59167	-0.167331	0.266584	0.12127	0.730777
TRIM21	2.51008	-0.170679	0.26882	0.121352	0.730777
PFKFB3	1.94899	-0.159369	0.266689	0.121355	0.730777
ZRANB2	2.86647	0.177112	0.276267	0.121467	0.730777
ACVR2A	3.42994	-0.186947	0.260243	0.12168	0.730777
RAD21	4.56625	0.205074	0.267465	0.12184	0.730777
CTDSP2	3.6529	0.194076	0.274654	0.121962	0.730777
NCL	6.3034	0.210289	0.250396	0.122068	0.730777
RGS18	8.27917	-0.201569	0.205274	0.122197	0.730777
CD99	2.33093	-0.166546	0.267874	0.122197	0.730777
ZNF417	8.85449	0.211229	0.219163	0.122281	0.730777
RPL29	5.84563	-0.203643	0.233465	0.122921	0.730777
GFRA3	2.21727	0.162662	0.273528	0.123073	0.730777
SPATA21	1.73922	0.113106	0.226727	0.123214	0.730777
SDCBP	3.80411	0.18694	0.271039	0.123524	0.730777
N4BP2L2	2.69129	0.170668	0.274586	0.123564	0.730777
PTPA	1.88331	-2.89286	0.303326	0.123602	0.730777
GRIP2	1.84983	-0.145274	0.261884	0.123602	0.730777
SLC2A4RG	2.16575	-0.159262	0.265052	0.1237	0.730777
SPG7	4.79344	-0.19713	0.245386	0.123814	0.730777
TGFBI	3.01584	0.174445	0.274349	0.124045	0.730777
NHP2	2.73715	0.161651	0.270834	0.124086	0.730777
BRD2	3.22005	0.184988	0.274126	0.124125	0.730777
CALR	5.89425	-0.20158	0.234303	0.124158	0.730777
VPS4A	2.39149	-0.163811	0.265168	0.125022	0.734307
RCC1L	3.09428	-0.176795	0.264868	0.125051	0.734307
LRIG2	1.95212	-0.152698	0.264207	0.125523	0.736086
SLC44A2	2.94694	-0.172424	0.263466	0.125657	0.736086
DUX4	20.339	-0.177427	0.148319	0.125857	0.736086
ACVR1	2.61405	0.157912	0.269514	0.125942	0.736086
UBE2T	2.12606	-0.154033	0.262904	0.126251	0.737031
SIRT6	1.6047	-0.13321	0.257426	0.126617	0.738303
PCMTD1	2.36472	0.16587	0.272757	0.127083	0.739026
ZFYVE19	1.54222	-0.135008	0.258249	0.127125	0.739026
ANKRD50	3.67513	0.187842	0.271822	0.127184	0.739026
VPS16	1.66936	-0.129578	0.255907	0.12742	0.739541
HNRNPA3	5.55351	0.20647	0.249308	0.127573	0.739569
LGI2	2.70313	-0.171103	0.265627	0.127997	0.741167
DCAF12L1	2.37559	0.134424	0.259975	0.128335	0.74184
ZNF680	7.80028	0.204828	0.227671	0.128473	0.74184
ZNF627	2.126	-0.154211	0.263589	0.128558	0.74184
APBB3	2.54527	0.167682	0.27147	0.129098	0.744096
FHL3	2.1048	-0.146861	0.260673	0.129415	0.745067
BVES	2.38068	0.154759	0.267358	0.129735	0.745916
RPL36	3.4088	-0.180756	0.257893	0.129861	0.745916
RRM2	3.11555	-0.155076	0.264351	0.130172	0.746847
SH3KBP1	2.54568	-0.159436	0.260858	0.130702	0.747835
URB2	1.99513	-0.14763	0.260981	0.130725	0.747835
LATS1	1.81794	-0.140434	0.259042	0.130879	0.747835
KRTAP5-8	2.28698	-0.143626	0.260271	0.130972	0.747835
CAV1	2.64967	-0.149394	0.260769	0.131092	0.747835
HMGB2	2.31193	-0.159059	0.262838	0.131493	0.747845
NHLH2	28.7237	0.187631	0.169288	0.131507	0.747845
VWA5A	2.05525	-0.150812	0.261183	0.131742	0.747845
AARSD1	2.03992	-0.149195	0.261098	0.131743	0.747845
RPL13A	4.34517	-0.185688	0.255918	0.132042	0.747845
ACTR1B	2.42608	-0.158904	0.262007	0.132135	0.747845
TBRG1	2.12514	-0.148735	0.259546	0.132328	0.747845
BBLN	4.22456	-0.184393	0.249639	0.132399	0.747845
KIF1B	4.65402	0.191983	0.259919	0.132439	0.747845
USP22	4.08475	0.191335	0.263692	0.132901	0.748567
MINDY3	2.59094	-0.165136	0.260049	0.132972	0.748567
SFSWAP	2.08153	-0.148378	0.260282	0.133015	0.748567
ANAPC15	2.26802	-0.152985	0.260154	0.133263	0.748788
ARVCF	2.4281	-0.15742	0.260218	0.133354	0.748788
CDH15	4.77725	-0.188307	0.248322	0.1337	0.749769
EOMES	6.06521	-0.195654	0.227325	0.133828	0.749769
CSDE1	5.37213	0.187495	0.25658	0.134994	0.753705
RFX7	2.19517	0.151566	0.265548	0.135042	0.753705
PSMD13	2.08007	-0.142391	0.256875	0.135643	0.753705
HNRNPA1	15.0464	-0.185349	0.174747	0.135818	0.753705
GOLGA4	3.18157	0.175128	0.26683	0.135977	0.753705
WDR46	2.45003	-0.155024	0.260663	0.13625	0.753705
H2BC4	2.07421	-0.144007	0.258236	0.13634	0.753705
PEX11G	2.98995	-0.15172	0.264856	0.136342	0.753705
IST1	3.04281	0.167549	0.268247	0.136407	0.753705
PAOX	2.57874	-0.158412	0.259667	0.13644	0.753705
SIDT2	2.51322	-0.149054	0.258595	0.136476	0.753705
SH3D21	3.31463	-0.173399	0.255086	0.136524	0.753705
GBA2	2.39375	-0.152766	0.258616	0.136541	0.753705
UTP18	2.28443	-0.144539	0.257109	0.136727	0.753705
ZNF589	2.64336	-0.160673	0.259043	0.136923	0.753705
CBL	3.28586	0.176844	0.266008	0.136941	0.753705
RB1CC1	2.24271	0.14274	0.26166	0.13713	0.753915
TRAFD1	2.11432	-0.143948	0.257618	0.137437	0.754772
MAPKAPK2	2.71712	0.160928	0.266137	0.138338	0.757044
ZBTB3	2.44371	-0.162707	0.259179	0.138493	0.757044
SHFL	2.77699	-0.161369	0.258279	0.138788	0.757044
PDCD5	2.50434	0.163065	0.266417	0.13882	0.757044
PRELID1	1.67716	-0.137621	0.257201	0.138887	0.757044
SARDH	3.80109	-0.167612	0.258997	0.138954	0.757044
TRIM6	2.67672	-0.151168	0.258707	0.138999	0.757044
PTPRS	3.39491	0.182161	0.264341	0.139061	0.757044
USP24	2.63225	0.15651	0.264285	0.139957	0.761092
NOMO3	2.67577	0.158589	0.265187	0.140322	0.761157
TMSB10	6.06447	-0.187932	0.232763	0.140418	0.761157
TSPAN14	1.99405	-0.137562	0.255281	0.140475	0.761157
GAB2	2.4307	0.153556	0.264511	0.140623	0.761157
COL5A2	6.4225	0.194102	0.239373	0.14073	0.761157
HLA-E	1.98502	-0.136912	0.254573	0.140891	0.761207
JOSD2	4.32847	-0.1848	0.240664	0.141253	0.762164
DSN1	2.68004	0.156158	0.263219	0.141496	0.762164
CSRP1	1.9621	-0.143151	0.256487	0.141548	0.762164
PHF1	2.4284	-0.151553	0.256756	0.141677	0.762164
MAPKBP1	7.97963	-0.191016	0.221388	0.141863	0.762343
GLRX	1.92856	-0.135251	0.254749	0.142091	0.762746
H2BC8	3.47989	-0.164107	0.261386	0.14237	0.762985
NCALD	2.2182	-0.152478	0.257706	0.14244	0.762985
RBM39	4.19289	0.180719	0.260063	0.142845	0.764338
H3C13	5.15032	-0.183485	0.2421	0.143161	0.764743
SCRIB	2.22298	-0.144483	0.255284	0.143379	0.764743
HABP4	2.36149	-0.15512	0.257961	0.143433	0.764743
GTF2IRD1	2.57451	0.163181	0.264815	0.143543	0.764743
NME3	1.92182	-0.139991	0.256163	0.143957	0.764743
QKI	7.79896	0.19505	0.225178	0.143988	0.764743
MARK3	3.15069	0.163795	0.2635	0.144273	0.764743
PRPF4	1.65732	-0.134374	0.254647	0.144333	0.764743
G3BP1	3.24952	-0.166226	0.253708	0.144517	0.764743
CLIP3	2.83801	0.131383	0.254869	0.144551	0.764743
ZNF799	4.30908	0.17754	0.258681	0.144709	0.764743
HUWE1	2.25668	-0.14351	0.255645	0.144755	0.764743
ATP5MC3	3.8812	-0.178109	0.247559	0.145277	0.764885
JPT1	4.4091	0.180747	0.256265	0.145306	0.764885
ZNF3	2.17473	-0.148294	0.256626	0.1454	0.764885
WDR1	1.42042	-0.123551	0.251333	0.145434	0.764885
SSBP4	1.98877	-0.136188	0.253919	0.145562	0.764885
YJEFN3	2.48311	-0.154336	0.25528	0.1457	0.764885
WNT3	2.28981	-0.145534	0.255273	0.146125	0.766316
ZNF66	3.63145	0.174964	0.259602	0.146369	0.766552
MEOX2	1.53467	-0.127801	0.25233	0.146545	0.766552
DAP	2.12895	-0.146755	0.255504	0.14663	0.766552
MCM3	2.55665	-0.150037	0.254483	0.146824	0.766765
MRPS23	2.4211	-0.152895	0.257172	0.147189	0.76787
UBP1	3.04134	0.157469	0.259976	0.147807	0.76866
RAB21	2.08503	-0.145116	0.254951	0.147831	0.76866
HOXB3	2.07064	0.147017	0.260642	0.147949	0.76866
NR1H3	2.00284	-0.141366	0.255391	0.14813	0.76866
CDK13	2.23512	0.145518	0.259972	0.148392	0.76866
GNG14	2.00123	-0.141517	0.25494	0.14841	0.76866
GTF3C6	2.08415	-0.148058	0.25574	0.148503	0.76866
GNAI3	1.80108	-0.135913	0.253846	0.14857	0.76866
ADSL	2.6427	0.155668	0.260951	0.148852	0.769052
GRPEL2	2.25504	-0.152003	0.254971	0.149097	0.769052
ZDBF2	1.84355	-0.133468	0.252383	0.149154	0.769052
EEF1A2	1.82486	-0.129862	0.251335	0.149493	0.769052
OR3A3	2.34177	-0.15185	0.255318	0.149496	0.769052
CDKAL1	2.0523	-0.143815	0.253755	0.149709	0.769052
RTL10	2.4352	0.13395	0.255638	0.149722	0.769052
CARD9	6.29549	-0.184341	0.227567	0.150074	0.769117
TUBB4B	7.83505	-0.183593	0.210093	0.150131	0.769117
EAF2	1.9321	-0.138058	0.253719	0.150253	0.769117
MLEC	2.0337	-0.142829	0.254058	0.150349	0.769117
VASH1	2.14608	-0.13135	0.251606	0.150681	0.769722
CFL1	3.10124	0.168072	0.260977	0.150775	0.769722
VPS18	1.8335	-0.134254	0.252762	0.151629	0.773206
SHANK1	2.34789	-0.15195	0.254497	0.151767	0.773206
AKR1E2	3.93017	0.171114	0.256546	0.152124	0.773325
MRPL12	1.96479	-0.129191	0.250797	0.15248	0.773325
PET117	3.74644	0.176034	0.255261	0.152527	0.773325
CHCHD5	2.31939	-0.146464	0.253473	0.15253	0.773325
MBD3	3.43949	-0.16008	0.250627	0.152563	0.773325
ADAM19	3.70742	0.164745	0.257734	0.152775	0.773616
CSKMT	2.27683	-0.129361	0.251425	0.153087	0.773932
PSMB5	2.84603	0.15998	0.259381	0.153147	0.773932
MED19	4.18864	0.176844	0.251985	0.153662	0.77518
MAPK6	3.55591	0.109089	0.246501	0.153817	0.77518
NAB1	2.72034	0.149619	0.258599	0.153929	0.77518
TBC1D2B	2.53896	-0.157035	0.253796	0.154013	0.77518
KIF2C	2.46854	-0.15168	0.253752	0.154192	0.775297
EPDR1	1.80291	-0.133977	0.252084	0.154627	0.776706
GPC3	2.53413	0.150768	0.258648	0.155148	0.776866
TCF12	3.96155	-0.170203	0.242343	0.155205	0.776866
TMEM209	3.08004	0.160095	0.257905	0.155413	0.776866
GPKOW	3.08482	0.163985	0.258524	0.155514	0.776866
MAP1A	2.37426	-0.147371	0.25165	0.155577	0.776866
HIPK3	2.45001	0.151549	0.258186	0.15572	0.776866
MDFI	2.6224	-0.156235	0.251858	0.155746	0.776866
SLTM	2.4566	0.126114	0.251734	0.155941	0.777063
NES	7.75518	0.185517	0.230019	0.156484	0.777353
BABAM2	2.42489	0.131509	0.253017	0.156584	0.777353
PRR12	2.10434	0.139099	0.255713	0.156665	0.777353
HSPH1	1.94824	-0.136182	0.251789	0.156796	0.777353
EGR1	6.1841	0.174425	0.245659	0.157206	0.777353
SYNE1	1.53597	-0.117345	0.247248	0.157211	0.777353
COL25A1	2.26535	-0.146555	0.252187	0.157238	0.777353
CREB5	2.32139	0.144908	0.25683	0.157362	0.777353
CCDC85A	1.82318	-0.12481	0.24898	0.157397	0.777353
FNTA	2.47125	0.131714	0.252878	0.158323	0.780097
GAA	1.53934	-0.123597	0.249202	0.158356	0.780097
ANKRD13A	3.15999	-0.153532	0.250061	0.158421	0.780097
SELENOF	2.31572	0.144366	0.256156	0.159326	0.783152
EVL	7.78381	0.184913	0.220547	0.159611	0.783152
HADHB	2.14684	-0.137525	0.25019	0.159767	0.783152
IDH3A	2.21766	-0.135735	0.249947	0.159881	0.783152
GCC1	1.80758	-0.131951	0.250581	0.159889	0.783152
MYH7	6.22354	0.180167	0.241451	0.160278	0.783152
CUTA	1.90327	-0.130638	0.249488	0.160522	0.783152
NAA10	2.61322	-0.14561	0.250338	0.160623	0.783152
PRMT5	2.09908	-0.138882	0.250097	0.160708	0.783152
LONP1	1.89463	-0.124965	0.248897	0.160928	0.783152
GGTLC1	6.74003	0.180595	0.234064	0.160937	0.783152
NASP	2.02738	-0.140241	0.250524	0.161059	0.783152
FOXN3	1.9606	-0.138772	0.251417	0.161206	0.783152
PXN	3.79346	0.164671	0.254435	0.161233	0.783152
FAM3A	4.21219	-0.16907	0.241487	0.161511	0.783742
TTLL1	1.88371	0.207946	0.299378	0.161722	0.784007
ZNF776	3.93533	-0.148411	0.254382	0.16213	0.785225
MYOM1	4.53198	0.167222	0.250881	0.162529	0.785751
SGCB	3.36483	0.165273	0.252882	0.162553	0.785751
TRIM47	1.8124	-0.130932	0.249747	0.163335	0.78825
PBX2	3.1133	0.162103	0.253533	0.163385	0.78825
ZFP41	3.36331	-0.161208	0.243601	0.164096	0.790916
LARS1	2.67469	0.151691	0.254752	0.164386	0.791414
GSN	3.45351	0.158027	0.252907	0.164515	0.791414
ZNF707	1.7098	-0.126678	0.248248	0.16474	0.791735
EIF3A	18.9283	-0.166749	0.160807	0.165048	0.792452
P4HTM	2.38986	-0.146537	0.250123	0.165219	0.792515
ARL16	2.25959	-0.139272	0.248933	0.165527	0.792634
SIGMAR1	8.52897	0.181691	0.220891	0.165698	0.792634
SAFB2	2.23223	-0.138114	0.248328	0.165798	0.792634
CEP250	2.10572	-0.136376	0.248853	0.165914	0.792634
ZNF529	4.20452	0.161774	0.251735	0.166313	0.792634
RABGGTB	2.31208	0.138916	0.253421	0.16638	0.792634
SMARCB1	2.81521	-0.149431	0.246285	0.166955	0.792634
PDCD6	3.41265	0.160065	0.252485	0.167193	0.792634
SAT2	1.78657	-0.122689	0.246726	0.167212	0.792634
F12	2.43205	-0.14118	0.248644	0.16726	0.792634
POLA2	1.74262	-0.125277	0.247377	0.167734	0.792634
FUS	8.55164	0.180779	0.210711	0.167747	0.792634
OR4Q3	2.0861	-0.127409	0.246665	0.168029	0.792634
SCT	4.08851	-0.163995	0.238884	0.16811	0.792634
H4C8	2.10258	-0.139585	0.248903	0.168141	0.792634
TMEM94	2.26211	-0.138902	0.249518	0.168229	0.792634
KCNE5	2.85411	-0.147744	0.245965	0.168456	0.792634
H3C6	2.31878	-0.135976	0.248073	0.168461	0.792634
GPS1	2.40846	0.138202	0.252711	0.168629	0.792634
EDAR	4.16038	-0.164623	0.234211	0.16881	0.792634
RTL1	4.85909	0.16535	0.246085	0.169132	0.792634
KDELR2	1.76962	-0.122487	0.246503	0.169142	0.792634
ATP2A2	13.9431	0.176087	0.191105	0.169241	0.792634
TLE4	1.77501	-0.122855	0.246423	0.169415	0.792634
PSME3	2.33023	0.132425	0.250966	0.16943	0.792634
TRIM5	1.84205	-0.126843	0.24766	0.16945	0.792634
GIGYF1	1.9045	-0.127337	0.247134	0.169626	0.792634
FAM180B	3.53942	-0.157224	0.241941	0.16968	0.792634
TNNC2	19.7699	-0.175415	0.190469	0.169946	0.793133
EIF3F	2.57668	0.150367	0.253452	0.17021	0.793624
LCN1	2.38569	0.131411	0.250764	0.170672	0.794447
CIRBP	5.31891	0.166279	0.242978	0.171003	0.794447
FBXO31	1.83774	-0.125972	0.246704	0.171079	0.794447
ZNF518A	2.21254	0.139925	0.25238	0.171139	0.794447
TRAK1	4.31434	0.163164	0.244619	0.17118	0.794447
TMEM135	1.81419	-0.127565	0.247167	0.171675	0.795418
MICAL1	4.36086	0.164145	0.246477	0.171708	0.795418
CPN1	1.91008	-0.122647	0.245973	0.171892	0.795418
SETD3	2.54938	-0.138931	0.249605	0.172139	0.795418
LAMC1	8.09722	0.176732	0.213911	0.172299	0.795418
UBA1	3.4807	-0.15404	0.244438	0.172343	0.795418
RPL36A	4.67988	0.159349	0.24544	0.172516	0.79548
SLCO4A1	2.01827	-0.128215	0.245953	0.172802	0.795637
EEF1D	4.96942	-0.167307	0.226938	0.172871	0.795637
RPLP2	5.18918	-0.136029	0.250074	0.173027	0.795637
PIP	1.66891	-0.116913	0.244701	0.173639	0.796693
PFKL	3.27617	0.15198	0.250334	0.173894	0.796693
TIE1	1.37795	-0.108561	0.243105	0.17423	0.796693
LY6G5B	2.91569	0.144502	0.250414	0.174277	0.796693
LRRFIP2	4.68793	0.163728	0.243209	0.174285	0.796693
ABHD17A	2.28886	-0.134479	0.245894	0.174664	0.796693
AMFR	2.23016	-0.136519	0.246344	0.174776	0.796693
RPL22L1	2.1687	-0.129454	0.246238	0.175203	0.796693
POTEE	3.21	-0.153926	0.24167	0.175369	0.796693
ABITRAM	3.13906	0.156092	0.249423	0.175537	0.796693
PLEKHM2	2.43501	0.132246	0.249501	0.175957	0.796693
PSMA3	2.11709	-0.132113	0.246159	0.176006	0.796693
XPNPEP3	2.40052	-0.137233	0.245849	0.176293	0.796693
CCNL2	4.28091	0.166179	0.242217	0.176403	0.796693
RAP1GAP2	2.72964	0.143674	0.249901	0.176566	0.796693
PARM1	5.78767	0.161813	0.240374	0.176567	0.796693
SNRPA	2.00051	-0.129692	0.245584	0.176655	0.796693
POSTN	4.51056	0.154367	0.245624	0.17682	0.796693
ARFRP1	2.11548	-0.131494	0.24613	0.176964	0.796693
ARPIN	2.59283	0.143206	0.249993	0.17726	0.796693
ZNF76	2.53812	0.107794	0.243278	0.177266	0.796693
LAT	1.82901	-0.120311	0.244381	0.177271	0.796693
CSNK1G2	2.47417	0.141978	0.250711	0.177319	0.796693
NAA50	2.67056	0.139206	0.249808	0.17761	0.796693
FAHD2B	2.84746	0.149763	0.249457	0.17763	0.796693
CUX1	3.51674	0.155125	0.247482	0.177688	0.796693
MAPK10	2.62516	0.0884589	0.238229	0.177785	0.796693
H2AC12	2.32595	-0.131027	0.244794	0.177883	0.796693
ZFHX4	2.74238	0.144253	0.249526	0.17807	0.796693
IRF2BP2	2.72393	-0.144325	0.244582	0.178417	0.796693
UBE2V2	3.44236	-0.14956	0.240295	0.178449	0.796693
RPS12	8.57	-0.168575	0.19458	0.17853	0.796693
NSRP1	2.21145	-0.127483	0.244164	0.179434	0.796693
C12orf50	1.86651	-0.125029	0.244648	0.179944	0.796693
GFAP	2.0501	-0.12619	0.244396	0.18012	0.796693
RPS15	6.05263	0.171913	0.225955	0.180388	0.796693
CCDC88B	15.5607	-0.166269	0.176817	0.180431	0.796693
MAPK12	1.75043	-0.11365	0.243085	0.1805	0.796693
ZKSCAN5	2.73996	-0.142664	0.244008	0.180508	0.796693
PCNX1	2.53343	0.136548	0.248697	0.180522	0.796693
MEIS1	2.27548	-0.135173	0.245541	0.180622	0.796693
FGFRL1	2.49794	-0.13551	0.244252	0.180691	0.796693
LUC7L3	3.60841	0.158526	0.24604	0.180766	0.796693
INKA2	1.72805	-0.121179	0.244304	0.180884	0.796693
RBMXL1	4.2934	0.128627	0.246628	0.180897	0.796693
CHMP1A	2.16185	0.126594	0.247852	0.180982	0.796693
BLOC1S1	2.1258	-0.129493	0.244877	0.18104	0.796693
PICALM	2.25718	0.134857	0.24906	0.181134	0.796693
JPH2	3.05933	-0.150689	0.239705	0.181258	0.796693
TPI1	7.93717	-0.168626	0.211021	0.181343	0.796693
NDUFA13	2.5238	-0.113969	0.2434	0.181378	0.796693
ID3	2.07655	-0.126571	0.243561	0.18167	0.79712
SHARPIN	1.66049	-0.114671	0.242819	0.18187	0.79712
EXOSC3	4.40917	-0.143915	0.244237	0.182164	0.79712
OXA1L	1.72544	-0.118442	0.243799	0.182337	0.79712
TAF6	3.47428	-0.15217	0.237517	0.18243	0.79712
ATG4D	2.33209	0.133986	0.248458	0.182431	0.79712
ZNF684	6.22271	0.171798	0.220719	0.183392	0.800621
SLIRP	1.98781	-0.120678	0.243324	0.183708	0.800808
HSPA4	2.88392	0.148116	0.247144	0.183755	0.800808
MYH14	2.79557	-0.141998	0.241209	0.184199	0.802043
CCDC80	1.47852	-0.111495	0.24194	0.184769	0.803826
ROBO1	2.05301	-0.130735	0.244886	0.185479	0.805821
CYTH2	2.57588	-0.11957	0.244592	0.185652	0.805821
RGS22	2.48294	-0.135927	0.242874	0.185932	0.805821
RGR	1.80886	-0.123438	0.243969	0.185948	0.805821
PHIP	1.85659	-0.12201	0.243094	0.186033	0.805821
ATG13	2.04231	-0.125722	0.244024	0.186766	0.808296
ROCK1	2.32436	0.128874	0.246815	0.187076	0.80864
FGFR4	2.3039	-0.133866	0.243546	0.187169	0.80864
AK7	2.10302	-0.126688	0.242973	0.187706	0.808978
AMOTL1	3.62344	0.152903	0.243761	0.187823	0.808978
COMMD1	2.1702	-0.131855	0.243031	0.187852	0.808978
NPAS2	2.69441	0.138939	0.246998	0.188074	0.808978
ZNF317	2.31823	-0.128355	0.243908	0.188103	0.808978
UROS	2.21305	-0.131049	0.242542	0.188217	0.808978
LRRC3B	2.09292	-0.125363	0.242403	0.188664	0.809859
RASSF10	2.32093	0.13139	0.247063	0.188746	0.809859
SLC1A4	2.52948	0.134031	0.24662	0.188965	0.810103
TEAD1	2.58221	-0.138768	0.241511	0.189302	0.810856
PGK1	2.98911	-0.143982	0.237936	0.190418	0.814627
CNN2	2.1424	-0.126543	0.242173	0.190508	0.814627
CHSY1	3.91114	0.143518	0.243283	0.191399	0.816384
XRCC6	3.20381	0.143665	0.243981	0.191523	0.816384
GABARAPL1	3.17826	-0.944266	0.338613	0.191733	0.816384
GSTM1	2.75979	0.132402	0.244957	0.191734	0.816384
WAC	3.52206	0.149432	0.243276	0.191748	0.816384
MYL6	4.22117	-0.149565	0.236095	0.192149	0.816384
FBLN1	3.74275	-0.14879	0.235051	0.192236	0.816384
TMEM240	2.03575	-0.123167	0.241541	0.192332	0.816384
NICN1	2.3322	-0.13194	0.241997	0.192388	0.816384
DCTN2	2.57789	0.136633	0.245827	0.192769	0.817309
NPIPA1	8.31342	0.165692	0.211827	0.192981	0.817513
GLG1	2.97234	0.141471	0.243992	0.193295	0.817757
WDFY3	2.45401	0.119137	0.243524	0.193962	0.817757
IZUMO2	1.96024	-0.124682	0.242068	0.193976	0.817757
MAP4	4.26022	0.154745	0.235768	0.1941	0.817757
RER1	2.95777	0.124979	0.243348	0.194106	0.817757
PPFIA4	2.48529	-0.130908	0.240545	0.194222	0.817757
EEF1G	8.55293	0.165075	0.216501	0.194334	0.817757
NDUFA10	1.98207	-0.122665	0.241736	0.194435	0.817757
CDC14B	2.3155	0.126402	0.244967	0.194747	0.817757
FGF11	2.07264	-0.126332	0.241474	0.194809	0.817757
BAHD1	3.5778	0.101903	0.239878	0.194836	0.817757
CACNA2D1	3.62435	0.140644	0.242591	0.195517	0.818082
MTA2	2.33678	0.126036	0.244454	0.195621	0.818082
CHRND	5.21991	0.156938	0.234455	0.195634	0.818082
CD164	3.09943	0.142072	0.244011	0.195715	0.818082
AIF1	2.09669	-0.118098	0.240903	0.195731	0.818082
PITX3	2.6838	-0.132409	0.240317	0.19614	0.819106
LMOD3	2.40857	0.130803	0.244922	0.196813	0.820256
FOXO4	1.93771	-0.123973	0.242015	0.196979	0.820256
TMEM213	9.15656	0.165018	0.196113	0.197171	0.820256
PAX6	2.75465	-0.138812	0.243041	0.197296	0.820256
PDCD4	25.1252	-0.144144	0.140253	0.197401	0.820256
STRAP	2.34845	0.131926	0.244728	0.197464	0.820256
SF3B2	2.6509	0.130052	0.243616	0.197563	0.820256
JAM3	2.42969	0.130702	0.244494	0.197804	0.820576
MEN1	2.5196	0.128335	0.244091	0.198996	0.824047
ELF2	2.40859	0.103699	0.240152	0.19923	0.824047
BRME1	2.2081	-0.122861	0.240581	0.19926	0.824047
PHC3	2.47781	0.122392	0.24347	0.1993	0.824047
PEG10	13.674	0.162067	0.192881	0.199578	0.824517
DCAF1	3.44257	0.143043	0.241288	0.200244	0.826583
IRF9	3.00511	0.136308	0.242478	0.200456	0.826777
BICD1	3.65541	-0.147699	0.23283	0.20072	0.826824
ZNF577	3.15577	-0.136952	0.237372	0.200798	0.826824
METTL17	2.67455	-0.133089	0.239752	0.201403	0.828145
TSN	1.94811	-0.117521	0.240602	0.20145	0.828145
NXF1	2.22981	-0.126339	0.239767	0.201689	0.828446
SRSF8	2.92523	0.126417	0.241975	0.202216	0.829256
KIF2A	2.18299	0.119834	0.242655	0.202538	0.829256
ATP1B3	3.12252	-0.143735	0.238105	0.20254	0.829256
ATP1B4	3.24876	0.129566	0.241966	0.202601	0.829256
SNX4	2.48537	0.128484	0.243067	0.202714	0.829256
SH3PXD2A	2.73476	0.105039	0.239526	0.203065	0.829355
PRMT7	2.036	0.121652	0.243024	0.203168	0.829355
C1QBP	2.763	-0.128952	0.237999	0.203236	0.829355
NPEPPS	3.25875	0.142312	0.240335	0.203591	0.830073
CGGBP1	2.53448	0.12943	0.242818	0.203856	0.830073
PALD1	3.72207	0.146505	0.238116	0.20391	0.830073
SUGP2	3.52275	0.14037	0.240185	0.204307	0.83079
BCAT2	2.38422	-0.1267	0.23945	0.204418	0.83079
CHDH	3.19923	0.137227	0.240949	0.204594	0.83083
SEMA3G	2.11769	-0.120671	0.239647	0.204898	0.831392
ILRUN	2.53676	-0.12163	0.239275	0.205409	0.832318
SENP6	2.36014	0.128592	0.242454	0.205713	0.832318
NDUFB5	2.2371	-0.12519	0.23802	0.206038	0.832318
CDC42EP1	1.98837	-0.112135	0.238558	0.206224	0.832318
GABBR1	3.11326	0.117982	0.24088	0.206232	0.832318
DUSP10	2.39416	-0.124035	0.238834	0.206375	0.832318
MRPL21	2.04981	-0.12305	0.239126	0.206597	0.832318
CIC	2.33494	-0.118301	0.238092	0.206639	0.832318
AP4B1	2.18761	-0.125283	0.238891	0.206645	0.832318
VCP	2.87034	0.131193	0.240926	0.206981	0.832318
ARFGEF1	2.44463	0.123878	0.241807	0.20702	0.832318
MYBL2	2.31683	-0.123404	0.238769	0.207123	0.832318
HNRNPF	2.47005	-0.128441	0.237985	0.207406	0.832786
RPS26	3.11619	0.111205	0.240115	0.207965	0.833875
STXBP4	3.21682	0.130706	0.241084	0.20801	0.833875
SRSF1	7.48263	0.159242	0.208899	0.2085	0.835168
CDC27	2.56747	0.127518	0.241181	0.208761	0.835544
FAAH2	1.68176	-0.107508	0.238187	0.208959	0.835667
MYL2	2.55754	-0.125748	0.237309	0.209467	0.836951
MGAT1	2.38319	0.125928	0.241378	0.209614	0.836951
COL13A1	4.63868	-0.149968	0.221107	0.209923	0.837518
RTN4R	2.13248	-0.121271	0.238185	0.210096	0.837539
MTMR9	1.82079	-0.108953	0.238109	0.210342	0.837853
MED13	3.93477	0.146886	0.235574	0.210905	0.838914
NKX2-4	2.15685	-0.115259	0.237793	0.211009	0.838914
KALRN	1.58938	-0.10295	0.237234	0.211112	0.838914
DKK3	1.71798	-0.105137	0.237176	0.211438	0.839543
RIPK2	2.45047	0.125684	0.240823	0.211872	0.840599
DHPS	2.48212	0.124898	0.240747	0.212245	0.840639
RGS21	1.3942	-2.80782	0.362286	0.212252	0.840639
IARS1	2.31016	0.125571	0.240939	0.212597	0.840639
MRPS24	2.49526	0.106975	0.238941	0.212811	0.840639
PRKCQ	1.59459	-0.107556	0.237638	0.212846	0.840639
BCAS3	2.35434	-0.122239	0.237036	0.21289	0.840639
ARHGDIA	3.75793	-0.140123	0.230856	0.213077	0.840713
SPHK1	1.53473	-0.103305	0.236951	0.213751	0.842541
RAB6A	2.18031	0.123004	0.240908	0.213877	0.842541
CASP2	5.08914	-0.149882	0.218269	0.214091	0.842721
HNRNPH3	6.35732	0.153745	0.217596	0.214763	0.843505
PDHX	2.55181	-0.126175	0.235409	0.214853	0.843505
SMIM40	6.92529	-0.152322	0.210535	0.215091	0.843505
RING1	2.3904	-0.124583	0.235881	0.21515	0.843505
ZNF765	2.5204	0.126131	0.240034	0.215406	0.843505
EEF1B2	2.16019	-0.12037	0.236554	0.215438	0.843505
TBKBP1	2.30095	-0.105034	0.23615	0.215471	0.843505
STRIT1	2.12876	-0.116385	0.236617	0.215689	0.8437
LRRC20	2.13008	-0.113716	0.237023	0.215916	0.843928
MAD2L2	1.78254	-0.110315	0.236917	0.216749	0.846524
NIPSNAP2	2.97797	0.106563	0.237846	0.217116	0.847295
DPH1	2.16103	-0.115498	0.236681	0.217565	0.847972
BPHL	1.92593	-0.112131	0.237021	0.217966	0.847972
TGFB2	2.37429	0.123765	0.239555	0.217968	0.847972
INAVA	2.12138	0.116001	0.227605	0.218131	0.847972
IER5	1.81719	-0.107435	0.236461	0.218137	0.847972
CYB5R3	2.44117	-0.121415	0.236493	0.218483	0.848657
BARD1	2.7505	0.126624	0.238578	0.219536	0.849657
HSP90B1	4.75794	-0.14105	0.224789	0.219667	0.849657
JSRP1	2.01282	-0.115178	0.236202	0.220127	0.849657
SLC36A1	2.15536	-0.118096	0.235693	0.220253	0.849657
UBTD1	2.04423	-0.114731	0.236371	0.220357	0.849657
ZNF394	2.21928	-0.107488	0.236383	0.220374	0.849657
GALNT17	2.46959	-0.12218	0.234874	0.22039	0.849657
ZNF28	2.54826	-0.119862	0.235123	0.220395	0.849657
POFUT2	2.03583	-0.117493	0.236607	0.220544	0.849657
TLR3	1.72297	-0.109145	0.236407	0.220606	0.849657
CCDC86	8.38488	0.141159	0.227526	0.220656	0.849657
ATP1A2	2.5671	0.123096	0.238451	0.220778	0.849657
SCN5A	2.07951	-0.113147	0.235504	0.221058	0.850078
KCTD12	2.34186	-0.1158	0.235407	0.22129	0.850252
RACK1	5.30229	0.13777	0.231281	0.221579	0.850252
PLD2	1.96816	-0.106613	0.235423	0.221667	0.850252
PRR5	2.45046	-0.122436	0.23438	0.221783	0.850252
TAP2	2.08584	-0.107438	0.235193	0.222567	0.851148
TNC	13.8092	-0.147089	0.169389	0.222772	0.851148
COL9A2	2.65693	-0.125503	0.233999	0.222953	0.851148
CTSS	2.27078	-0.115162	0.234876	0.223135	0.851148
PTBP2	2.18793	-0.117957	0.235214	0.223262	0.851148
SHMT2	3.23077	0.0996814	0.236226	0.223289	0.851148
H3C2	2.13224	0.22397	0.299956	0.223367	0.851148
MARCHF7	3.09464	0.129028	0.236673	0.223377	0.851148
PDE6D	2.55994	0.120384	0.237644	0.224297	0.853518
ZNF524	1.59865	-0.100293	0.235293	0.224341	0.853518
COL12A1	2.31712	-0.120184	0.235828	0.224583	0.853792
PCBP4	3.07699	-0.130606	0.230368	0.22477	0.853853
ADAMTS2	1.9182	-0.10908	0.236094	0.224965	0.853946
GK2	2.06598	-0.114349	0.235095	0.225319	0.854642
GNL3L	3.20765	0.134633	0.234266	0.225559	0.854902
VRK3	1.68322	-0.103145	0.235237	0.226178	0.856601
ANAPC5	3.57297	-0.132917	0.226847	0.226534	0.856987
ACSF2	12.5805	-0.144327	0.167506	0.226764	0.856987
ALKBH6	2.04283	-0.0979454	0.234888	0.227029	0.856987
HIPK1	2.15142	0.113782	0.237815	0.227112	0.856987
IMPDH1	2.6038	-0.12169	0.232746	0.227338	0.856987
CYBRD1	2.21192	0.115237	0.237877	0.227542	0.856987
RPL9	6.7842	-0.147673	0.202431	0.227613	0.856987
GLOD4	1.73639	-0.108229	0.235304	0.227659	0.856987
WDR26	2.10155	-0.113991	0.234878	0.227822	0.856987
CDC42BPA	2.61258	0.118604	0.236891	0.228098	0.85738
TSPAN33	2.14233	-0.115984	0.234101	0.22852	0.858198
GJC1	2.35859	0.117914	0.237086	0.228696	0.858198
NFE2L1	5.6825	0.143205	0.223041	0.228937	0.858198
TCAF1	3.34111	0.131263	0.234273	0.229001	0.858198
RRP1	1.73241	-0.103911	0.234579	0.229199	0.858231
EBF1	6.23681	-0.145524	0.204261	0.229649	0.858231
DAOA	10.2299	-0.149717	0.194973	0.229741	0.858231
ABI3	1.57522	-0.0992976	0.234465	0.230027	0.858231
MMS19	2.74765	0.0965564	0.235408	0.230167	0.858231
COL16A1	1.71305	-0.106572	0.23496	0.230173	0.858231
ZNF43	1.87144	-0.105649	0.234223	0.230326	0.858231
PLEKHG2	2.69248	-0.123167	0.233415	0.230383	0.858231
ZNF516	3.11589	-0.126286	0.230621	0.230905	0.859476
BTBD2	2.49829	-0.119137	0.234094	0.231264	0.859476
FAM171A1	2.43403	-0.12149	0.23496	0.231384	0.859476
WDR6	2.66153	0.120409	0.235885	0.231404	0.859476
PAFAH1B1	3.10707	0.125926	0.235361	0.231913	0.860079
MGST2	1.72018	-0.10236	0.23422	0.231969	0.860079
ZNF443	1.82059	-0.103881	0.234887	0.232338	0.860079
PPP1R8	2.17107	0.114599	0.236951	0.232405	0.860079
CADM4	2.17101	-0.111684	0.23438	0.232459	0.860079
CEACAM5	2.82746	0.111501	0.236132	0.232933	0.860079
ZNF530	1.97487	-0.108275	0.234758	0.233248	0.860079
SNRNP200	3.94262	0.13847	0.229298	0.233941	0.860079
COQ10A	1.78582	-0.106791	0.23515	0.233986	0.860079
ADGRA3	2.72306	-0.121823	0.23189	0.234049	0.860079
KYNU	2.94169	-0.120733	0.230716	0.234157	0.860079
ZNF678	2.95857	-0.125368	0.229673	0.23456	0.860079
FXYD7	1.65207	-0.0972547	0.233573	0.234573	0.860079
MIER3	1.8131	-0.10559	0.234578	0.234579	0.860079
ASH1L	2.76216	0.121349	0.235497	0.234692	0.860079
VPS72	2.25757	-0.113573	0.233515	0.23474	0.860079
PPP2R3B	2.66897	-0.118023	0.23172	0.235016	0.860079
BRINP3	1.77355	-0.101026	0.233792	0.235103	0.860079
STIM1	2.24097	-0.114827	0.234459	0.235132	0.860079
TP53	2.2353	0.111972	0.236353	0.23517	0.860079
PPP2R5C	2.09824	-2.73897	0.298458	0.2353	0.860079
SF3B1	3.81334	0.135901	0.229125	0.235348	0.860079
FUCA2	2.77729	0.125937	0.233982	0.235698	0.86016
ADPRH	2.44835	-0.115171	0.233301	0.235715	0.86016
LANCL2	2.1038	-0.113007	0.233344	0.236213	0.860245
HOMER2	2.36616	0.117742	0.235579	0.236246	0.860245
FAM114A1	2.34385	-0.112646	0.232628	0.236254	0.860245
POLR2F	2.26209	-0.111707	0.232816	0.236567	0.860331
DUS1L	3.16622	0.129379	0.232502	0.236621	0.860331
TSR3	2.57241	0.118284	0.235235	0.236971	0.860976
HNRNPK	4.45015	0.139355	0.223352	0.237323	0.861114
KIF14	1.91909	-0.100708	0.233135	0.237522	0.861114
ZSCAN32	2.48418	0.117299	0.235313	0.237525	0.861114
SPC24	2.7334	-0.124789	0.229405	0.237863	0.861714
ATRNL1	1.42583	-0.0925442	0.233385	0.238054	0.861782
LYSMD3	1.95584	-0.110303	0.233449	0.238405	0.862429
CGB2	1.4664	-0.0909569	0.232832	0.239098	0.863565
CDR2	3.75321	0.133067	0.229557	0.239164	0.863565
TRAPPC14	2.27298	-0.110523	0.232732	0.239237	0.863565
ISLR	1.80147	-0.103632	0.233554	0.23986	0.864839
UQCRC1	3.08893	0.123334	0.232835	0.239935	0.864839
PDE4C	3.20065	-0.122597	0.228595	0.240354	0.865724
MRPL20	3.10006	0.10975	0.234701	0.24078	0.866633
RAB12	2.39487	-0.116126	0.231427	0.241032	0.866918
SIGLEC16	6.92242	-0.142549	0.198504	0.241414	0.867284
KHNYN	2.18851	0.109131	0.235233	0.24148	0.867284
RAB28	3.65393	0.132212	0.228941	0.242019	0.867396
SNX3	2.24401	-0.114201	0.231674	0.242184	0.867396
MSC	2.84497	-0.11949	0.230526	0.242795	0.867396
FCF1	6.75721	0.14303	0.207781	0.243384	0.867396
TPPP3	4.66577	-0.136684	0.214682	0.243386	0.867396
CCND2	12.157	0.145003	0.186962	0.243534	0.867396
ATXN2	2.87334	0.109995	0.233732	0.243631	0.867396
KLC1	4.16084	0.126749	0.229655	0.243765	0.867396
DDX39B	4.94448	0.125478	0.229403	0.244093	0.867396
PLG	3.02538	0.126523	0.232171	0.244128	0.867396
CYC1	1.68391	-0.099855	0.232667	0.244282	0.867396
MCRIP1	2.26839	-0.114101	0.230835	0.244385	0.867396
AP5B1	2.6039	-0.116051	0.230361	0.244459	0.867396
FSTL1	7.58184	0.140797	0.213511	0.244539	0.867396
TIAL1	3.18614	0.125157	0.230973	0.244598	0.867396
HS6ST2	3.16133	0.124699	0.23144	0.244608	0.867396
CCDC14	4.08802	0.131491	0.22766	0.244716	0.867396
RANBP1	3.02751	-0.119014	0.229608	0.245135	0.867396
MTA3	2.78037	0.11867	0.233022	0.245189	0.867396
SNW1	3.03614	0.112992	0.232841	0.245563	0.867396
MYLK3	1.85278	-2.52814	0.365171	0.245564	0.867396
OGA	3.31159	0.126714	0.230112	0.245645	0.867396
PPP3R1	2.46867	-0.111547	0.231055	0.245739	0.867396
DDX58	2.65218	0.113732	0.233534	0.246151	0.867396
TTC17	2.42203	0.113037	0.234065	0.24622	0.867396
KRT8	2.39667	-0.112795	0.230378	0.246231	0.867396
PABIR2	1.8775	-0.106256	0.23237	0.246583	0.867396
CLK2	2.30541	0.111513	0.234267	0.246894	0.867396
AREG	1.99709	-0.103394	0.231753	0.246913	0.867396
MYOD1	3.21566	-0.122984	0.227016	0.247343	0.867396
ZC3H13	2.91349	0.121349	0.232	0.24742	0.867396
PKDCC	2.00241	-0.103635	0.231868	0.247428	0.867396
MLLT11	2.44674	-0.112867	0.230632	0.247444	0.867396
PTPN23	2.33554	0.112104	0.233606	0.247513	0.867396
RRBP1	2.25023	-0.107331	0.231356	0.24881	0.867396
DEFA1B	2.16505	0.106142	0.233807	0.248844	0.867396
VCL	2.04469	-0.10578	0.232215	0.249002	0.867396
DCHS2	3.16336	0.125259	0.230568	0.249138	0.867396
LRRN4	1.65003	-0.0995336	0.232403	0.24918	0.867396
ZC3HC1	2.07993	-0.103511	0.231382	0.249311	0.867396
TOX4	2.77039	0.116018	0.232754	0.249324	0.867396
PRRX1	2.75895	0.117226	0.232454	0.249471	0.867396
BAGE5	3.29522	0.117276	0.231165	0.24949	0.867396
LMOD2	2.02104	0.103862	0.23393	0.249576	0.867396
GRIP1	1.91789	0.106455	0.234188	0.2496	0.867396
NKTR	2.60808	0.114644	0.233129	0.249603	0.867396
PPP1R9A	3.57632	0.130172	0.226893	0.249695	0.867396
DTNBP1	2.75265	0.115481	0.232056	0.249904	0.867396
NLGN2	2.06944	-0.10877	0.231492	0.250133	0.867396
YKT6	2.38998	-0.10677	0.230871	0.250386	0.867396
PTPN18	1.89032	-0.100453	0.231698	0.250426	0.867396
PGAP6	2.41441	0.105859	0.233177	0.250527	0.867396
CCNI	4.44605	-0.124822	0.22391	0.250771	0.867639
RPL6	9.56485	-0.139775	0.200259	0.250955	0.867677
CNN3	5.10772	0.133334	0.21868	0.251531	0.868447
NEGR1	5.24531	0.132652	0.221491	0.251538	0.868447
OCIAD1	4.04473	0.130995	0.2248	0.251897	0.868447
HSPA9	3.7728	0.128833	0.227095	0.251909	0.868447
CCDC51	4.08416	0.121149	0.229702	0.252046	0.868447
DLL3	1.81096	-0.100941	0.231407	0.252256	0.868574
ADGRL2	2.63782	0.115426	0.2322	0.252897	0.86958
SEPTIN11	5.10273	0.136512	0.217097	0.252932	0.86958
ANXA2	3.17352	-0.120393	0.227128	0.25307	0.86958
ANKRD23	1.36456	-0.0917314	0.231865	0.253273	0.869619
VAMP8	8.40058	0.139287	0.20716	0.253571	0.869619
SKP1	4.11001	-0.128347	0.220953	0.253634	0.869619
DAAM2	1.97552	-0.10234	0.231601	0.253834	0.869619
ANKRD13D	2.71189	-0.115724	0.228088	0.254287	0.869619
CTHRC1	2.72077	-0.11534	0.228345	0.254295	0.869619
MYLK4	5.07451	0.133366	0.221593	0.25442	0.869619
PHLDB2	2.94976	0.114799	0.230863	0.254472	0.869619
IGF2BP2	2.59334	0.112157	0.23212	0.255262	0.871463
SSNA1	1.93364	-0.0987572	0.230888	0.25536	0.871463
TBCA	2.68936	-0.119603	0.226187	0.255568	0.87158
TMEM250	3.96939	-0.123531	0.223977	0.25603	0.872559
RPS7	1.9431	-0.103273	0.23037	0.256866	0.874411
TNFAIP8L2	1.56446	-0.0939122	0.231089	0.25732	0.874411
HSPE1	2.84182	-0.118598	0.225306	0.257669	0.874411
CDYL	1.93774	-0.0958696	0.231443	0.257822	0.874411
ZNF625	8.52326	-0.137259	0.19295	0.257898	0.874411
HNRNPA0	2.08403	-0.104653	0.229626	0.258605	0.874411
FAM20C	4.83601	0.0923004	0.231974	0.259095	0.874411
PSMG3	7.21307	-0.137062	0.202564	0.259385	0.874411
MYH11	2.27786	-0.106865	0.229595	0.259427	0.874411
SLC36A4	3.54052	0.126035	0.225453	0.259517	0.874411
C15orf48	2.32364	-0.109132	0.228729	0.260085	0.874411
DLG5	2.47332	0.111518	0.231151	0.260248	0.874411
MSLN	1.32994	-0.0852006	0.230552	0.260522	0.874411
FAM131C	1.9967	-0.0960046	0.230377	0.260588	0.874411
FLAD1	2.00497	-0.104566	0.229821	0.260643	0.874411
CD81	3.94548	0.103958	0.231465	0.260805	0.874411
ARPC4	2.14271	-0.102339	0.230036	0.261187	0.874411
CCL24	1.89446	-0.0977302	0.230711	0.261209	0.874411
CNOT1	2.58432	-0.112995	0.226609	0.261395	0.874411
CRIP1	1.71634	0.0755968	0.213328	0.261414	0.874411
EIF5A	3.12941	-0.122487	0.224064	0.261481	0.874411
TTYH1	1.94383	-0.103059	0.230387	0.261631	0.874411
C17orf97	2.28959	0.102717	0.23204	0.261725	0.874411
FBLN5	2.15054	0.105861	0.232028	0.261793	0.874411
EXTL3	3.16453	-0.112462	0.226024	0.262005	0.874411
RAB39A	4.64301	0.131389	0.21977	0.262158	0.874411
OR56B4	2.07306	-0.099288	0.229606	0.26217	0.874411
EEF2K	2.476	-0.109769	0.228065	0.262204	0.874411
FKBP8	1.97695	-0.0993486	0.229976	0.262331	0.874411
RPS4X	6.87051	0.136382	0.206015	0.262336	0.874411
ARHGAP11A	1.94331	-0.0979706	0.230461	0.262444	0.874411
PPP6R2	2.38337	-0.101526	0.229612	0.262567	0.874411
NEO1	2.45639	-0.112133	0.227301	0.262573	0.874411
RETNLB	2.6033	-0.109083	0.227481	0.262834	0.874411
EIF4B	5.16006	-0.126362	0.224944	0.263055	0.874411
QARS1	4.18911	0.12069	0.226364	0.263344	0.874411
GDI2	2.79262	0.10999	0.230299	0.263348	0.874411
RETSAT	2.27881	-0.107042	0.228306	0.263459	0.874411
SRRM2	7.26223	0.139043	0.196506	0.263546	0.874411
UBL5	1.89089	-0.0979339	0.229826	0.263564	0.874411
PAX7	3.12065	0.112312	0.229585	0.264113	0.87565
HOXB13	2.41773	-0.0928362	0.230178	0.264396	0.876008
CCSER2	2.34349	0.102864	0.231241	0.264688	0.876381
ZFP82	2.42166	-0.109403	0.228072	0.264859	0.876381
MYBPH	10.135	0.1361	0.206108	0.265193	0.876722
PDCL	1.83966	-0.0971122	0.2299	0.265312	0.876722
KIF3B	1.78325	-0.098936	0.22974	0.265945	0.877694
CDCA3	2.78473	0.110624	0.229893	0.266063	0.877694
HEATR5A	2.67284	-0.110372	0.226968	0.266133	0.877694
PRPF39	2.35476	0.10493	0.230787	0.266659	0.877999
SMIM19	3.14326	-0.117255	0.222916	0.267348	0.877999
MED20	1.87004	-0.0923787	0.229401	0.267907	0.877999
POLE4	2.04197	-0.0977761	0.229008	0.268008	0.877999
COA4	3.12013	-0.115042	0.223534	0.268106	0.877999
KCNMB4	3.33557	0.121523	0.225372	0.268188	0.877999
HLA-DQB1	2.28068	0.101145	0.231159	0.268198	0.877999
FAM47B	2.48917	-0.108351	0.226906	0.268227	0.877999
OXLD1	1.94225	-0.0985659	0.229834	0.268365	0.877999
MIB1	3.43067	0.111858	0.229342	0.268418	0.877999
MUC21	3.93912	-0.122758	0.21716	0.268535	0.877999
XPO1	2.4165	0.103974	0.2309	0.268596	0.877999
SNURF	2.51154	-0.100337	0.229393	0.268794	0.877999
RBM5	3.44675	-0.116774	0.223093	0.268823	0.877999
ADPRS	8.65638	-0.132753	0.184533	0.268888	0.877999
PARP11	1.90629	-0.0948712	0.22934	0.269079	0.877999
TRAP1	2.38856	-0.107721	0.227724	0.269208	0.877999
LUC7L2	2.4813	0.105888	0.229978	0.2701	0.878257
NMU	2.62802	-0.108673	0.225819	0.270625	0.878257
FKBP1B	2.39105	0.0771398	0.229639	0.270963	0.878257
EID1	2.86507	-0.110624	0.225913	0.270978	0.878257
ZNF704	2.85384	-0.113878	0.224408	0.271091	0.878257
SUGT1	2.06538	0.102848	0.23052	0.271168	0.878257
SLC39A3	4.23312	-0.123231	0.214664	0.27121	0.878257
PLPP7	2.56354	0.112434	0.22881	0.27127	0.878257
SRSF5	7.57875	-0.13097	0.209936	0.271473	0.878257
FBXO11	2.60424	0.105121	0.230356	0.27221	0.878257
MTPAP	2.89781	0.111693	0.227966	0.272277	0.878257
UBE2L3	3.0736	0.115302	0.22704	0.272295	0.878257
ABLIM3	2.4148	0.108414	0.229584	0.272457	0.878257
AP5S1	1.99851	-0.0952068	0.229364	0.272757	0.878257
DDAH1	3.07431	0.0849178	0.230163	0.272963	0.878257
ARHGEF7	2.3843	0.109432	0.229704	0.273229	0.878257
TIMP1	2.06195	-0.101614	0.228988	0.273268	0.878257
GPR160	1.87059	-2.46111	0.338746	0.273354	0.878257
GRIN2A	3.55929	0.116763	0.225647	0.273429	0.878257
MBP	3.20765	0.113772	0.227089	0.273442	0.878257
ELN	6.27462	-0.130167	0.198552	0.273897	0.878257
SSBP3	2.11241	0.101274	0.230333	0.274187	0.878257
MAFK	2.18035	-0.103214	0.228231	0.274289	0.878257
NUCKS1	4.06833	-0.123778	0.214992	0.274791	0.878257
TMEM269	1.58059	-0.0895487	0.229361	0.274823	0.878257
MGRN1	2.02355	-0.100747	0.228016	0.274916	0.878257
COA1	2.10848	0.101026	0.230068	0.274981	0.878257
QDPR	2.12124	-0.100076	0.228171	0.275119	0.878257
ERMARD	1.44645	-0.087177	0.229289	0.275299	0.878257
SNRPN	1.89676	-0.0996367	0.22822	0.275612	0.878257
EPB41L3	1.99627	0.0974337	0.23035	0.27575	0.878257
STIP1	6.24588	0.130657	0.208623	0.275807	0.878257
PIGT	2.33395	-0.103157	0.226542	0.275831	0.878257
LPP	2.24368	0.10388	0.229766	0.275962	0.878257
CEACAM16	2.15029	0.0996157	0.229952	0.276028	0.878257
RNF167	8.66585	-0.131494	0.188198	0.276266	0.878257
MED24	1.8758	-0.0993048	0.228158	0.276445	0.878257
C22orf23	2.13956	-0.101896	0.227777	0.276487	0.878257
RAB5C	2.26614	0.105124	0.229524	0.276582	0.878257
H2AC11	2.20062	-0.102515	0.227127	0.27662	0.878257
CALM3	4.01306	-0.119572	0.216238	0.276813	0.878257
ASB2	1.65912	-0.0926186	0.229113	0.276914	0.878257
PODN	2.05189	-0.0995776	0.227998	0.277051	0.878257
UBE2K	2.1609	-0.10283	0.226669	0.277199	0.878257
PLAT	2.98089	-0.111627	0.222968	0.27732	0.878257
NFYA	147.658	0.109584	0.118468	0.277363	0.878257
SLC22A17	2.31065	-0.103324	0.226121	0.277756	0.878946
IPO4	2.17909	0.104827	0.229268	0.278088	0.879276
MALRD1	7.30452	0.131557	0.202449	0.278212	0.879276
TRIM17	9.58264	0.131901	0.190091	0.278704	0.880274
TOMM20	3.29042	0.111396	0.225551	0.279649	0.882682
RBM14	2.34322	0.0995758	0.228966	0.280015	0.882682
CREB3L2	2.96642	0.113194	0.226124	0.28006	0.882682
EIF3J	2.16782	-0.10039	0.22694	0.280172	0.882682
RPN2	2.94225	0.11247	0.225686	0.280504	0.883173
IL25	1.45665	-0.0828468	0.228618	0.280908	0.883888
TRIT1	2.14008	0.0944872	0.22949	0.281881	0.885855
UNC45B	3.61937	0.117415	0.222811	0.281887	0.885855
NCAPH	1.85979	-0.0919138	0.227893	0.28211	0.886
VKORC1	2.09453	-0.0988084	0.226901	0.28248	0.886013
KHDRBS3	1.77989	-0.0931201	0.228044	0.282492	0.886013
MACF1	6.02736	0.125686	0.212972	0.282723	0.886013
KPNA3	3.69699	-0.10827	0.222457	0.282901	0.886013
ATP5MK	1.96771	-0.0975145	0.22702	0.28315	0.886013
MBD6	1.99345	-0.0946391	0.227574	0.283177	0.886013
TNNC1	10.0814	-0.129367	0.199236	0.283769	0.886266
CXCR2	2.55999	-0.0885549	0.22747	0.283773	0.886266
ZNF83	2.70574	0.0933281	0.229014	0.284034	0.886266
NNT	2.0472	-0.0977895	0.227043	0.284113	0.886266
SHD	2.8837	-0.0955541	0.227712	0.284143	0.886266
OTOF	3.34937	0.113122	0.224067	0.284814	0.887802
BRK1	3.39587	-0.11599	0.217111	0.285053	0.887996
SRCAP	3.17187	0.110448	0.225432	0.285534	0.888941
EPB41L4B	1.95321	0.0941562	0.229142	0.285826	0.889297
ZNF746	2.31254	-0.0998675	0.225671	0.286109	0.88934
REX1BD	2.41633	-0.102913	0.225181	0.286371	0.88934
WNT8A	2.68684	-0.103548	0.224971	0.286475	0.88934
MAGED1	7.13512	-0.120956	0.213121	0.286551	0.88934
NXPE3	1.92545	-0.0924236	0.22733	0.286926	0.889952
PCYOX1	1.914	0.0917295	0.229005	0.287345	0.890164
PNN	7.45066	-0.126589	0.192303	0.287383	0.890164
PRMT2	3.67072	-0.106159	0.224727	0.287529	0.890164
FBXW2	1.88985	-0.0922696	0.227134	0.287827	0.89019
RPL18A	3.28255	0.113643	0.223213	0.287904	0.89019
ABR	2.38853	-0.102295	0.225466	0.288461	0.89019
ERBIN	2.5282	0.100389	0.227452	0.288537	0.89019
ZXDC	2.33192	0.100456	0.227719	0.288689	0.89019
RPS23	8.69618	-0.127644	0.190273	0.2887	0.89019
MYC	2.68895	-0.10597	0.222708	0.288782	0.89019
ATP2C1	2.31147	0.0991244	0.227852	0.289193	0.890597
MAGEA8	4.33953	-0.119436	0.212477	0.289271	0.890597
KLF10	1.88	-0.0924959	0.226661	0.29005	0.891557
XIRP2	2.14127	0.0976039	0.227931	0.290616	0.891557
RNF181	4.5904	-0.116492	0.215031	0.290848	0.891557
ST6GALNAC4	1.62783	-0.0868959	0.227493	0.290986	0.891557
AVPR1B	2.42078	0.10425	0.226643	0.291131	0.891557
LAMTOR5	2.28199	0.0990091	0.227577	0.291156	0.891557
IL6ST	2.20947	0.0822749	0.228295	0.291165	0.891557
EBNA1BP2	2.19208	-0.100291	0.225042	0.29161	0.891557
ATP5F1C	2.03419	-0.0960005	0.226157	0.291874	0.891557
ATP5IF1	2.62552	0.103958	0.226001	0.292039	0.891557
LGALS3BP	1.57992	-0.0863419	0.227603	0.292051	0.891557
ARRDC4	2.11806	-0.0953571	0.225793	0.292074	0.891557
ECI2	2.40699	-0.100857	0.224531	0.292248	0.891557
BEX4	2.42108	0.104149	0.226868	0.292264	0.891557
ZNF136	2.49718	0.101251	0.226967	0.292381	0.891557
EIF4G2	7.22409	0.127448	0.200456	0.292434	0.891557
DIO1	2.57425	0.0953249	0.227604	0.292814	0.892173
PA2G4	2.69389	-0.097425	0.225776	0.293146	0.89264
LILRA6	1.67295	-0.0877637	0.227385	0.293466	0.89264
SCYL2	2.10591	0.0976019	0.227556	0.293605	0.89264
SERPINH1	2.79137	0.107329	0.224937	0.293681	0.89264
ZKSCAN1	2.77203	0.107001	0.22471	0.294526	0.893638
EGFL7	3.70359	0.113989	0.220176	0.294642	0.893638
SYTL2	4.36584	0.120385	0.214638	0.29466	0.893638
MECP2	2.38957	-0.101094	0.22457	0.294724	0.893638
YPEL2	2.0009	-0.0853858	0.22671	0.295483	0.894567
CDK3	3.0467	-0.109377	0.219139	0.295529	0.894567
IGSF1	2.9975	0.104527	0.224746	0.295592	0.894567
SPRR2E	2.04755	-0.0915149	0.225781	0.295745	0.894567
ALDH1B1	1.76702	-0.0870293	0.226528	0.297092	0.897596
NSUN5	2.02811	-0.0967706	0.225327	0.297106	0.897596
NUP98	2.0641	-0.0923838	0.225599	0.297896	0.89903
ZNF646	1.75846	-0.0878101	0.226664	0.297947	0.89903
CLCN7	1.73349	-0.0881616	0.226508	0.298201	0.89903
SON	3.75237	0.113722	0.219893	0.298299	0.89903
EIF1	3.09873	-0.103452	0.221427	0.299942	0.902948
MAN2C1	1.9968	-0.0881765	0.225653	0.29996	0.902948
MAST2	2.1395	0.089681	0.227207	0.300428	0.903813
KLHDC8B	3.13199	-0.107472	0.218904	0.301239	0.904163
LMF2	2.53564	-0.0997765	0.222898	0.301386	0.904163
RIMKLA	2.25859	0.0978179	0.226269	0.301464	0.904163
PPFIA1	2.32454	-0.099777	0.223037	0.30148	0.904163
CCR10	1.87656	-0.088852	0.226179	0.30157	0.904163
RPS13	3.60406	0.109966	0.220312	0.301629	0.904163
ERBB2	2.11881	-0.0950513	0.224451	0.302076	0.904962
POLR1C	1.97781	-0.0924978	0.224849	0.302486	0.905528
SELENON	2.24864	0.0970387	0.226326	0.302627	0.905528
REPS1	2.35412	-0.095143	0.223517	0.30336	0.905678
COL5A3	2.22019	-0.096991	0.223748	0.30337	0.905678
NDUFB7	2.77655	-0.105653	0.219845	0.303626	0.905678
SERBP1	6.20831	-0.120069	0.202734	0.303741	0.905678
CTSD	3.33333	0.107885	0.221615	0.303841	0.905678
SDHC	3.05826	0.108247	0.222143	0.303906	0.905678
CBLIF	1.40209	0.149834	0.261411	0.304119	0.905678
SACS	4.53501	0.11561	0.213903	0.304181	0.905678
MAP3K2	1.93795	0.0902993	0.227047	0.304437	0.905678
DRAP1	1.65018	-0.0828619	0.226171	0.304487	0.905678
PTK2	2.50692	0.0903783	0.226269	0.305134	0.906352
RBM38	1.91932	0.090347	0.226984	0.305205	0.906352
TEF	2.02674	-0.0869216	0.225665	0.305351	0.906352
MTCH2	3.59482	0.106291	0.221174	0.305649	0.906352
MCAM	3.85271	0.112356	0.217112	0.305782	0.906352
POTEG	4.52862	0.112904	0.217738	0.305801	0.906352
HM13	2.11489	-0.093672	0.223951	0.30636	0.907471
LTBP3	3.79253	0.109925	0.218392	0.306911	0.908107
FBXO44	2.28495	0.070306	0.226874	0.307037	0.908107
CER1	2.13514	0.0816491	0.227002	0.307119	0.908107
C8orf33	1.9767	-0.0895909	0.225526	0.30742	0.908415
CLEC12B	2.62759	0.100857	0.224076	0.307586	0.908415
FKBP10	5.77679	-0.119471	0.199825	0.308061	0.908816
MRPL33	2.07304	-0.0942461	0.223845	0.308087	0.908816
ZNF32	1.86505	-0.08877	0.225274	0.308477	0.908816
GGA2	2.13876	0.0942641	0.225766	0.308746	0.908816
RNF187	2.68688	-0.101096	0.220749	0.308753	0.908816
EP300	1.80654	-0.0893304	0.224927	0.308814	0.908816
ZNRF4	2.27747	0.0924692	0.225774	0.309153	0.908816
LRP4	2.3835	0.0983428	0.224887	0.309175	0.908816
PAGE5	14.915	0.118834	0.202685	0.309399	0.90894
HCN4	2.06466	-0.0901593	0.224385	0.309676	0.909218
HDAC3	2.49822	0.097804	0.224646	0.309939	0.909457
INO80	2.04511	0.0871114	0.226526	0.310429	0.909618
SMPX	2.98178	0.100238	0.222712	0.310591	0.909618
PJA2	2.76048	-0.102435	0.219625	0.310643	0.909618
UTP11	2.51759	-0.0952896	0.222139	0.31103	0.909618
ATF5	2.82548	-0.0982657	0.220646	0.311637	0.909618
SCYL3	1.99056	-2.53712	0.322796	0.311773	0.909618
ATP6V0E1	1.84442	0.0887385	0.226305	0.312158	0.909618
DNAJA1	2.40948	-0.0977497	0.221505	0.312321	0.909618
DCDC2	1.7886	-0.0823807	0.225207	0.312348	0.909618
TMEM171	1.98081	0.0856465	0.226374	0.312419	0.909618
CLDN25	1.86511	-0.0865792	0.225072	0.312548	0.909618
SMAD7	6.41398	0.119253	0.202373	0.312781	0.909618
ATP6V1G1	2.02809	0.0865488	0.226202	0.312804	0.909618
SEC61G	3.09442	0.104476	0.220832	0.312875	0.909618
H4C1	16.267	-0.119966	0.165597	0.313309	0.909618
DYRK2	1.92199	-0.0876488	0.224273	0.313347	0.909618
ZFTA	2.52456	-0.10009	0.220434	0.313397	0.909618
ZNF703	2.8784	0.0989304	0.223323	0.313667	0.909618
NR1H2	5.03313	0.116855	0.207392	0.314083	0.909618
MED14	2.16671	-0.0910069	0.223746	0.314151	0.909618
HOOK3	2.26815	-0.0938433	0.222516	0.314731	0.909618
YWHAZ	5.22955	-0.113337	0.204027	0.314765	0.909618
TCEAL8	2.695	0.0963484	0.223604	0.314789	0.909618
COPS8	2.20728	0.0930567	0.22515	0.314802	0.909618
CD55	1.82668	0.0879938	0.226016	0.315038	0.909618
SLC34A2	2.69516	0.0755237	0.226325	0.315142	0.909618
ELAVL1	1.86534	0.0847462	0.22619	0.315228	0.909618
TAF1D	3.50402	-0.107502	0.216673	0.315511	0.909618
COL6A3	7.08865	0.120391	0.195166	0.31574	0.909618
YIF1A	2.16786	0.0856766	0.225763	0.315756	0.909618
CSRP3	2.29327	-0.0958499	0.222294	0.315788	0.909618
MARS1	2.51519	-0.0952204	0.222359	0.315812	0.909618
MEGF10	5.09082	0.117592	0.204926	0.316026	0.90971
HLA-G	2.34117	0.0916177	0.224956	0.316358	0.910143
NRXN2	2.23852	0.0940311	0.224545	0.316608	0.910339
SLC16A12	2.17616	-0.0920786	0.222685	0.317543	0.911503
DCTN5	2.40777	0.0773429	0.226081	0.31833	0.911503
PARVA	2.4257	-0.0970861	0.221096	0.318419	0.911503
PRMT6	2.05335	-0.0920872	0.222907	0.318421	0.911503
PCBP2	4.9167	0.111256	0.213055	0.318454	0.911503
ANXA7	2.09955	-0.0834167	0.225391	0.318528	0.911503
PAX3	2.42341	-0.0944015	0.221669	0.318571	0.911503
NAP1L4	3.09486	-0.105491	0.216314	0.318712	0.911503
BCHE	2.05756	0.090113	0.224963	0.319041	0.911503
MLF2	2.28535	-0.0929921	0.221991	0.319266	0.911503
HMGA1	1.9477	0.0860893	0.225638	0.319387	0.911503
LDHAL6A	4.56219	-0.111807	0.209394	0.31966	0.911503
UQCRHL	3.25214	0.103426	0.219562	0.31968	0.911503
SLC25A39	2.34549	0.0880301	0.224953	0.319816	0.911503
PRC1	1.97363	-0.0845572	0.223989	0.319828	0.911503
ACLY	2.4631	0.0949923	0.223766	0.320001	0.911503
SH3BGR	2.29808	0.0931757	0.224044	0.320212	0.911503
RPS9	3.49266	-0.101145	0.218959	0.320463	0.911503
RGS9	1.88928	-0.0849963	0.223814	0.320474	0.911503
ANAPC2	2.0288	-0.0828716	0.224059	0.320882	0.911916
C6orf62	2.17502	0.0930898	0.22394	0.320984	0.911916
FAM3C	9.87436	0.119835	0.184735	0.321276	0.912074
KHDRBS1	3.52384	0.103204	0.218609	0.32183	0.912074
CSTF3	5.42186	-0.112876	0.201151	0.322037	0.912074
RNF168	1.50005	-0.0785414	0.224919	0.322094	0.912074
LETMD1	2.1872	0.0877909	0.224948	0.322429	0.912074
USE1	1.74777	0.0996054	0.223226	0.322553	0.912074
C16orf78	6.43021	0.115151	0.203884	0.322641	0.912074
MAP3K8	2.71312	0.0999718	0.220985	0.322926	0.912074
PANK2	2.1927	-0.0883788	0.223415	0.323007	0.912074
PDHA1	2.91622	0.0997004	0.221282	0.323032	0.912074
EFR3A	2.65185	0.0973899	0.22215	0.323045	0.912074
ALDH3B2	2.76119	-0.0986041	0.218737	0.32336	0.912161
TERF2IP	3.08389	0.0973701	0.221114	0.323615	0.912161
KMT2C	2.26862	-0.0882785	0.222693	0.324381	0.912161
DDR1	2.59318	0.0951691	0.222576	0.324619	0.912161
SNTB2	1.76876	-0.0834755	0.223808	0.324718	0.912161
PRRG3	4.26826	-0.110853	0.20734	0.324804	0.912161
PRAM1	1.84049	-0.0827147	0.223958	0.324852	0.912161
OSBPL3	1.97603	-0.0844613	0.223212	0.324972	0.912161
CWC15	1.90058	-0.0824581	0.223933	0.325063	0.912161
WNT10B	2.8094	0.0985526	0.221026	0.325174	0.912161
PRNP	1.82987	-0.0858194	0.223421	0.325956	0.912161
ATP5MJ	2.93393	-0.0998366	0.216864	0.326093	0.912161
RHOBTB2	2.04489	-0.0831855	0.223461	0.326238	0.912161
POLQ	1.7799	-0.0778663	0.224146	0.326845	0.912161
LHX4	2.40318	-0.0909169	0.222047	0.327037	0.912161
FARP1	3.6193	0.10592	0.215845	0.327134	0.912161
TLK2	4.43758	-0.109291	0.205334	0.327329	0.912161
TMEM59	2.21541	-0.0862285	0.222973	0.327368	0.912161
SDHD	2.20801	0.0754536	0.225247	0.327655	0.912161
OTUD4	2.59556	0.0949109	0.221957	0.327826	0.912161
TIMP3	2.95788	0.0984037	0.220113	0.327826	0.912161
EMILIN1	4.25251	-0.105588	0.210107	0.327928	0.912161
GPR18	2.61708	0.0963674	0.221302	0.328308	0.912161
LEMD3	2.74171	-0.0950276	0.220712	0.328378	0.912161
NAPG	1.77266	-0.0827202	0.223399	0.328497	0.912161
FNDC1	2.04551	0.0875658	0.224197	0.328768	0.912161
CFDP1	9.44348	-0.115815	0.179465	0.328794	0.912161
DAZAP1	2.36336	-0.0938895	0.219952	0.328872	0.912161
CBX3	2.71445	0.0982852	0.220572	0.328941	0.912161
ANAPC7	2.9551	0.101516	0.219001	0.329227	0.912161
RSRP1	2.89558	-0.0993683	0.216819	0.329228	0.912161
GID8	2.30155	-0.0904874	0.221358	0.329269	0.912161
BCAM	2.02639	-0.0871082	0.22227	0.32928	0.912161
INTS11	1.81107	-0.0859434	0.22302	0.329667	0.912161
KDM7A	3.11469	0.0996941	0.219376	0.32967	0.912161
ZNF841	2.66389	0.0946892	0.221487	0.329796	0.912161
MMADHC	2.26182	0.0894317	0.223494	0.329822	0.912161
WDR5	2.62168	-0.0926162	0.219888	0.330018	0.912198
PSMB3	2.20322	0.0881983	0.22337	0.330606	0.912251
KBTBD8	1.98743	-0.0813804	0.223399	0.330644	0.912251
SECISBP2L	2.74526	0.0935333	0.222001	0.330749	0.912251
HOXC12	1.35519	-0.0741618	0.224808	0.330766	0.912251
SUB1	2.98971	0.097839	0.219623	0.330982	0.912344
PPP1R2	1.60071	-0.0787131	0.224056	0.331477	0.912908
LELP1	2.57759	0.0946991	0.221639	0.331552	0.912908
GPR141	2.14147	-0.0884876	0.221497	0.331874	0.913293
CNTROB	1.69266	-0.0784176	0.223651	0.333187	0.916401
RGS2	3.42557	0.102595	0.216296	0.333758	0.917467
MYO1C	2.8248	0.0947811	0.220776	0.334036	0.917728
CLN3	2.55395	-0.0905091	0.22013	0.334333	0.917875
DCAF16	2.50275	-0.0894256	0.220191	0.334457	0.917875
ZNF468	1.936	0.080673	0.22432	0.335252	0.918169
NGLY1	2.33359	-0.0857428	0.220957	0.335267	0.918169
TEX9	3.31934	0.100686	0.216922	0.335296	0.918169
FRG1	2.29211	0.0732367	0.225148	0.335646	0.918169
GNL3	2.87078	-0.0945863	0.218361	0.335854	0.918169
DPPA2	2.80234	0.0977419	0.219142	0.336121	0.918169
ELP5	1.99514	-0.0857258	0.222362	0.336146	0.918169
COX7A2L	2.10285	0.0851513	0.223637	0.336174	0.918169
DNAJC7	1.92883	-0.0836803	0.22222	0.336215	0.918169
WRNIP1	2.65687	0.091348	0.221982	0.336707	0.918423
PIEZO1	1.85529	-0.0835396	0.22253	0.33685	0.918423
PFDN6	2.25253	-0.091336	0.220424	0.336859	0.918423
RPS18	4.36285	0.107648	0.211043	0.337233	0.918941
AP2A2	2.30154	-0.087499	0.220264	0.337885	0.920217
VHL	2.24082	0.0859498	0.222839	0.338213	0.920609
TTC19	2.40035	-0.0906199	0.219184	0.338675	0.920784
PRRC2B	6.96592	0.118682	0.198351	0.338852	0.920784
NDUFB1	2.05199	-0.0867257	0.22113	0.338998	0.920784
C16orf70	1.83853	-0.0797973	0.222746	0.339335	0.920784
CKAP4	2.90473	0.091727	0.220161	0.339346	0.920784
H4C5	4.38798	0.104494	0.21369	0.339381	0.920784
CCT3	2.79683	0.0972166	0.218576	0.339981	0.921866
ITPRID2	16.0357	-0.111223	0.156697	0.340149	0.921866
ANKRD16	2.00981	-0.0864608	0.221391	0.340824	0.923047
CCN2	2.10315	-0.0858386	0.221357	0.340953	0.923047
IRAK1	1.9477	-0.0828531	0.221825	0.341253	0.923357
EIF2B1	2.08877	1.12661	0.577459	0.341454	0.923403
TMEM37	2.43475	0.0679649	0.224629	0.342145	0.924069
FIGN	2.31276	-0.080012	0.222342	0.342296	0.924069
UCHL1	1.84061	-0.0800406	0.222108	0.342512	0.924069
MYRF	1.35723	-0.0725386	0.223808	0.342708	0.924069
ACTC1	76.6592	0.111987	0.173698	0.343298	0.924069
SQSTM1	3.07901	-0.0935478	0.215909	0.343409	0.924069
KLC3	2.64705	-0.0896173	0.219262	0.343531	0.924069
ACTN1	2.68136	-0.093779	0.216359	0.343551	0.924069
GATAD2A	2.22392	-0.0863471	0.22009	0.343656	0.924069
HSPA5	3.60754	-0.102173	0.210572	0.343787	0.924069
NGFR	3.38952	-0.0969873	0.213354	0.343806	0.924069
HMGN1	5.90111	-0.10106	0.210242	0.343974	0.924069
NFYC	2.61681	0.092259	0.220179	0.344102	0.924069
RPS28	6.96169	-0.11045	0.193883	0.344368	0.924288
NAB2	2.28185	0.0865273	0.22209	0.345385	0.926426
IVNS1ABP	2.77746	-0.0893174	0.218854	0.345706	0.926426
BEX2	1.78684	-0.0820192	0.22178	0.345869	0.926426
CDK16	3.16292	0.0936783	0.218451	0.345905	0.926426
WIPI1	2.86759	-0.0880958	0.218435	0.346211	0.926692
MBTPS1	2.48075	0.0828142	0.22222	0.346495	0.926692
RIOK3	1.75815	-0.07594	0.222754	0.34656	0.926692
DDX18	2.25879	-0.0860091	0.219909	0.346797	0.92683
C22orf15	1.59168	-0.0727154	0.223113	0.347776	0.927532
NSUN2	2.05951	0.0822257	0.22266	0.347803	0.927532
NNMT	2.49549	-0.0924365	0.217233	0.347864	0.927532
TRIM74	1.7934	-0.0745832	0.222485	0.347944	0.927532
NDUFA5	1.91377	-0.0781446	0.221928	0.347987	0.927532
UBE2E3	2.36657	-0.0856709	0.219339	0.34942	0.930156
SPIN1	2.33552	0.0894377	0.220618	0.34956	0.930156
ATAD3A	6.68754	-0.107405	0.196699	0.349817	0.930156
PTPN11	2.38236	0.0785213	0.223241	0.34998	0.930156
FOCAD	1.96176	0.0713429	0.223851	0.350267	0.930156
C7	1.9797	0.0775468	0.223085	0.35047	0.930156
ARHGEF25	2.17382	-0.0854143	0.219797	0.350476	0.930156
RPS10	2.91328	-0.0915554	0.215527	0.351049	0.930156
ZNF175	1.49907	-0.0736392	0.222914	0.35107	0.930156
PIGBOS1	1.75609	-0.0790321	0.22153	0.351076	0.930156
FCGRT	3.68416	-0.0971613	0.212057	0.351569	0.930156
THOC1	2.02643	-0.0826085	0.220331	0.351876	0.930156
BTBD19	2.00773	-0.0820495	0.220764	0.352435	0.930156
MAP3K6	1.97653	-0.0812169	0.220592	0.352757	0.930156
BCAR1	1.90615	-0.0815835	0.220627	0.3528	0.930156
EIF3C	6.37638	0.108138	0.199439	0.352854	0.930156
CRELD1	2.56108	0.0835113	0.221197	0.352862	0.930156
GBA	2.45786	0.0887272	0.21983	0.352922	0.930156
WBP1	2.76147	0.0884115	0.220076	0.352971	0.930156
ZBTB41	1.91894	-0.0840023	0.22036	0.353074	0.930156
ANXA8	1.96263	-0.0793235	0.22124	0.353218	0.930156
DUSP6	2.00317	0.0833537	0.221731	0.353289	0.930156
CDKN1B	2.70357	-0.0875582	0.217471	0.353474	0.930156
PIM1	2.32372	0.0847919	0.221455	0.353534	0.930156
KIR3DL1	4.22436	-0.099962	0.207213	0.353619	0.930156
NKD2	2.2072	0.0655908	0.223907	0.354355	0.930826
FABP1	15.0479	-0.111135	0.183309	0.354379	0.930826
XPNPEP1	2.32209	-0.0858569	0.218383	0.354699	0.930826
RBM26	2.37708	0.0875332	0.220328	0.354746	0.930826
ZNF660	2.19368	-0.0804559	0.221195	0.354804	0.930826
RAB10	1.78692	-0.07725	0.221611	0.355136	0.931209
STON2	2.31676	-0.0825353	0.219247	0.356119	0.93142
YTHDC1	3.46111	0.0950996	0.21493	0.356293	0.93142
MTIF3	2.87585	0.0920685	0.217673	0.356573	0.93142
ZNF266	1.91866	-0.0803611	0.220365	0.357166	0.93142
ZSCAN29	2.35082	0.0701561	0.223354	0.357169	0.93142
TXNDC15	2.20888	0.0835006	0.221077	0.357835	0.93142
DST	3.02636	-0.0927544	0.213739	0.358026	0.93142
PDGFC	2.28906	-0.0822159	0.219648	0.35821	0.93142
TBX5	1.93512	-0.0794065	0.22083	0.358244	0.93142
SLF1	2.00688	-0.0790192	0.220908	0.358317	0.93142
ZSCAN25	1.86751	-0.0804275	0.22067	0.358414	0.93142
GRHL1	2.24984	-0.0824862	0.219289	0.358704	0.93142
PPP1R35	2.53301	0.0881102	0.219328	0.358777	0.93142
TAF15	4.03529	0.0963193	0.213628	0.358784	0.93142
TUBB6	4.58784	0.0987195	0.210559	0.359064	0.93142
BCL2	1.99904	-0.0817842	0.219343	0.359257	0.93142
RPS14	5.42148	-0.103462	0.198914	0.359295	0.93142
SENP5	2.02701	-0.0812714	0.220009	0.359556	0.93142
EIF5	2.2706	-0.0863011	0.217584	0.359692	0.93142
AKR1C2	1.87863	0.0777106	0.222211	0.359896	0.93142
MAST1	2.30516	0.0818022	0.220946	0.360203	0.93142
TOMM7	2.91421	-0.0915373	0.214237	0.360223	0.93142
ATP1A1	2.85906	0.0923221	0.216622	0.360232	0.93142
RGMA	5.68311	-0.102698	0.199649	0.36041	0.93142
HCFC1R1	1.66273	-0.0738118	0.221927	0.360776	0.93142
ALOX15	1.33918	-0.069702	0.222759	0.360937	0.93142
MYH2	3.06164	0.0677622	0.223594	0.361164	0.93142
PSMC2	1.94157	0.0768931	0.222176	0.361412	0.93142
NUSAP1	2.15599	-0.0836861	0.218259	0.361546	0.93142
IGHMBP2	8.97251	-0.107302	0.174047	0.361609	0.93142
SLC17A9	1.60975	-0.0709347	0.222062	0.361666	0.93142
RAC1	3.22112	-0.0923385	0.21262	0.361684	0.93142
MCM4	2.01745	0.0813262	0.221216	0.361801	0.93142
ECHDC1	2.06216	-0.0814387	0.219885	0.361859	0.93142
SETX	2.57652	0.0862873	0.219519	0.36189	0.93142
B3GALT6	2.02682	-0.0774233	0.220495	0.362221	0.93142
RGS16	3.89918	0.0800484	0.221185	0.362283	0.93142
ZNF117	3.40193	0.0947783	0.213384	0.362291	0.93142
CCM2L	2.19385	-0.0827263	0.218602	0.362801	0.931578
DGKZ	1.69364	-0.0735188	0.221564	0.362867	0.931578
CYP2D6	1.52326	-0.071902	0.222002	0.362914	0.931578
TMEM164	2.08379	-0.0827356	0.219395	0.363098	0.931578
SLF2	3.90155	0.0972968	0.211742	0.363313	0.931653
NSD1	1.98862	-0.0797304	0.219702	0.363533	0.931739
ATAT1	1.84863	-0.0799908	0.21969	0.364003	0.931789
PRDX6	2.00001	-0.0810855	0.219441	0.364102	0.931789
SYNGR2	2.52224	0.0703945	0.222478	0.364111	0.931789
CBWD2	3.53118	-0.0942515	0.210623	0.364548	0.93243
EXOSC6	3.27887	-0.0921557	0.214112	0.36498	0.932904
ANKRD60	2.16166	-0.0805809	0.218856	0.365106	0.932904
TECPR1	1.63155	-0.0743868	0.221082	0.365775	0.933588
PADI2	2.47846	-0.0844736	0.217099	0.365958	0.933588
TIPIN	2.60636	-0.0885877	0.215396	0.365963	0.933588
PBXIP1	2.62181	-0.0891224	0.214477	0.366224	0.933588
NOP10	1.85436	-0.0742825	0.220928	0.366424	0.933588
RTL8C	7.94892	-0.105005	0.192678	0.366767	0.933588
PTN	2.09595	-0.0805086	0.219104	0.367047	0.933588
NUP85	2.12594	0.0689788	0.222644	0.367107	0.933588
DAGLB	2.13516	0.0829675	0.219867	0.368026	0.933588
C1QL2	4.68781	0.695055	0.506069	0.368319	0.933588
SDE2	1.65288	-0.0733507	0.221003	0.368531	0.933588
TET2	3.69061	-0.0915011	0.21599	0.368622	0.933588
RPL10A	6.26411	-0.103262	0.19286	0.368624	0.933588
TMEM182	3.11663	0.0874093	0.216699	0.368681	0.933588
SEC23B	2.24686	0.0809844	0.219859	0.368711	0.933588
U2AF1L4	2.12106	0.0806849	0.220464	0.368786	0.933588
SPRR2F	1.23493	-0.0640973	0.222105	0.368949	0.933588
H2AC6	2.33283	-0.0817075	0.217869	0.368966	0.933588
PPP5C	3.13585	0.0893913	0.215683	0.369246	0.933588
PRKD3	2.47019	0.0756662	0.220953	0.369253	0.933588
MARVELD1	2.09372	-0.0781584	0.219594	0.369295	0.933588
NUDT8	1.86056	-0.0758484	0.220365	0.36965	0.933588
RBBP4	2.19817	0.0805619	0.220146	0.369666	0.933588
ZNF571	2.20876	0.0813998	0.219648	0.370144	0.934088
ADAM9	2.83612	-0.0886587	0.214245	0.370322	0.934088
CDK2	3.13031	0.0876258	0.216703	0.370706	0.934088
DUSP13	1.89316	-0.0745756	0.22034	0.370945	0.934088
MRPS35	2.17859	-0.0814827	0.217863	0.37097	0.934088
SUSD1	1.59899	-0.0724815	0.221087	0.370984	0.934088
MRPL10	3.41793	-0.0911461	0.2111	0.372211	0.936414
GZMB	2.17534	0.0807812	0.219866	0.372715	0.936414
MTMR3	2.09471	-0.0800692	0.218248	0.372879	0.936414
PMM2	2.00536	-0.0730441	0.220226	0.372943	0.936414
ACAA2	2.67845	0.0878789	0.216292	0.373013	0.936414
RPS5	4.19933	-0.0958782	0.204635	0.373031	0.936414
SELENOO	1.53644	-0.0704021	0.221293	0.373912	0.937227
CCZ1	2.43172	0.0828921	0.218686	0.374016	0.937227
TIMM23B	2.48265	-0.0847404	0.215261	0.374325	0.937227
ISCU	3.01413	0.0744247	0.221051	0.374364	0.937227
DNTT	3.01175	0.0877425	0.215623	0.374455	0.937227
ZAR1L	2.57395	-0.0839828	0.21566	0.374609	0.937227
[truncated: 3,004 more rows]

## Sheet: FIBERPRE_WT_vs_MDX
Gene	baseMean	log2FoldChange	lfcSE	pvalue	padj
PAM16	68.2871	-2.45638	0.101017	7.07936e-132	3.5418e-128
RARRES2	30.873	-2.63383	0.138377	1.90848e-82	4.77407e-79
SYNE3	30.6667	-2.41683	0.12869	2.94819e-80	4.9166e-77
PNLIPRP3	45.6869	-1.85819	0.107312	7.68483e-68	9.6118e-65
CDK5R2	21.8947	-2.22089	0.134995	8.22033e-62	8.22526e-59
FAM155B	21.8546	-2.48362	0.155217	1.78867e-59	1.49145e-56
PUSL1	20.4747	-1.93314	0.126627	1.34363e-53	9.60312e-51
GNRH2	17.8481	-2.17317	0.145387	6.54014e-52	4.09004e-49
HPS1	35.0968	-1.73345	0.122592	1.46368e-46	8.13643e-44
THAP10	12.9845	-2.34641	0.166737	6.23353e-46	3.11864e-43
CFAP99	22.8841	-1.70551	0.131285	3.64509e-40	1.65785e-37
FGD3	45.1213	-1.35357	0.109006	1.47552e-36	6.15171e-34
MZT2B	102.209	3.6183	0.290713	2.09492e-36	8.06222e-34
NRBP1	82.4053	-1.28923	0.106307	5.582e-35	1.99477e-32
S100PBP	20.9036	-1.60997	0.135303	6.04144e-34	2.01502e-31
ZNF142	20.1311	-1.53793	0.132605	2.23396e-32	6.9853e-30
SSMEM1	31.7923	-1.6942	0.1461	3.03824e-32	8.94136e-30
RRBP1	19.1752	-1.80684	0.155997	3.57919e-32	9.94817e-30
SLC35D2	24.9321	-1.41341	0.122234	4.79278e-32	1.26202e-29
SPATA31A6	27.4535	-1.38993	0.120126	5.51541e-32	1.37968e-29
UBXN11	18.9642	-1.54223	0.136709	8.95869e-31	2.1343e-28
HTRA3	30.9637	-1.40822	0.125454	2.69011e-30	6.11756e-28
APOF	20.0649	-1.53432	0.13808	3.56517e-30	7.75501e-28
DAPK1	51.535	1.75896	0.158027	1.23373e-29	2.57182e-27
PKMYT1	61.3655	-1.17976	0.108302	7.04783e-29	1.40726e-26
RBM42	37.4038	-1.17737	0.108271	7.31336e-29	1.40726e-26
OR11H6	35.3026	-1.40153	0.130225	2.91044e-28	5.39294e-26
ZNF764	24.2208	-1.40904	0.132519	1.37118e-27	2.45001e-25
FAM131C	20.2602	-1.69799	0.160612	3.32796e-27	5.7413e-25
CDKN2D	69.0536	-1.10918	0.105263	3.46128e-27	5.77226e-25
CRYBB3	22.9655	-1.46311	0.140836	1.04333e-26	1.6838e-24
LYRM2	292.32	1.32145	0.12809	4.80169e-26	7.50714e-24
ZNF106	190.149	1.58938	0.155336	5.94373e-26	9.01106e-24
IGHG3	28.6552	-1.57242	0.153041	8.35597e-26	1.22956e-23
R3HDM4	114.101	-1.78666	0.177766	6.64685e-25	9.50119e-23
PITX1	69.5446	-1.11119	0.110447	7.20182e-25	1.00085e-22
CD248	19.884	-1.36815	0.137103	1.0152e-24	1.37271e-22
RPS4Y1	33.2092	-1.11347	0.111613	1.51774e-24	1.99823e-22
COX8A	43.7779	-1.24078	0.124365	1.99052e-24	2.55347e-22
EOMES	43.8272	-1.07397	0.109964	1.38909e-23	1.7374e-21
TRAF3IP1	39.2436	-0.993776	0.102098	1.58505e-23	1.93415e-21
HLA-A	12.6305	-1.64484	0.170065	2.00897e-23	2.39307e-21
HMGB1	212.581	-1.09653	0.112653	2.97534e-23	3.46177e-21
SMYD1	90.3378	1.49008	0.154991	6.47171e-23	7.35862e-21
TTN	585.897	1.13231	0.11824	8.93376e-23	9.93235e-21
BGN	54.9713	-1.75274	0.186213	3.29233e-22	3.58076e-20
TMA7	158.629	-1.47472	0.157304	6.24757e-22	6.65034e-20
PIGQ	19.6519	-1.3165	0.141462	8.44017e-22	8.79712e-20
RASL10A	126.313	1.50524	0.163356	2.04657e-21	2.08959e-19
HSP90AB1	178.396	1.183	0.128134	2.3812e-21	2.38263e-19
KRTAP5-8	20.6574	-1.30457	0.142169	3.03624e-21	2.9785e-19
GFAP	28.9567	-1.18745	0.131213	8.76876e-21	8.43656e-19
SOX10	17.7282	-1.65015	0.183739	1.01997e-20	9.62816e-19
ELN	47.2957	-1.48423	0.167101	2.83974e-20	2.63097e-18
WNK1	37.4813	1.5105	0.169278	4.53543e-20	4.1256e-18
SRSF8	37.8799	1.38367	0.155186	6.13302e-20	5.4792e-18
TNC	105.728	-1.28224	0.144748	7.06709e-20	6.20292e-18
ZNF707	16.5507	-1.30428	0.14822	7.37035e-20	6.35756e-18
SCYL3	27.659	-1.79661	0.20241	8.01461e-20	6.79612e-18
GGTLC1	149.403	1.33928	0.151485	8.44045e-20	6.94672e-18
PHF2	23.2351	-1.12727	0.127696	8.46991e-20	6.94672e-18
MRPL41	14.4857	-1.87967	0.214997	2.68476e-19	2.16643e-17
PALD1	34.9637	1.46848	0.168006	2.92491e-19	2.32275e-17
CLEC11A	24.6332	-1.10667	0.127188	3.01811e-19	2.35931e-17
TGFB3	60.3923	-0.82369	0.0952016	5.11641e-19	3.93806e-17
CANX	75.178	1.07348	0.123986	5.24595e-19	3.97659e-17
ZNF540	110.213	1.04053	0.121008	6.62708e-19	4.94855e-17
H4C12	20.7239	-1.2625	0.150387	2.59453e-18	1.90889e-16
THBS4	290.99	2.37394	0.287075	3.78911e-18	2.74738e-16
MED10	19.8099	-1.41711	0.169431	4.28963e-18	3.06586e-16
CCL24	25.9542	-1.34593	0.163034	1.26704e-17	8.92814e-16
PITX2	23.2791	-1.06643	0.130231	2.10879e-17	1.46532e-15
MYL12A	89.8486	1.75216	0.2158	2.72931e-17	1.87051e-15
ZNF592	32.8231	-0.939438	0.115574	3.35352e-17	2.26725e-15
RAD23B	151.862	0.73447	0.0896485	3.83001e-17	2.55487e-15
TNFAIP8	444.604	1.09635	0.135076	4.04319e-17	2.66159e-15
ITM2B	86.1611	1.04436	0.128883	5.54221e-17	3.601e-15
SNX15	22.2458	-1.11096	0.138265	7.14378e-17	4.58209e-15
NEB	364.071	0.918963	0.113884	9.44563e-17	5.98184e-15
SETD7	104.587	1.06211	0.132472	9.92068e-17	6.1757e-15
SGCD	50.0379	1.17381	0.145826	9.99864e-17	6.1757e-15
MTRNR2L1	762.556	-1.21839	0.153566	2.1916e-16	1.33715e-14
ACTN2	447.687	1.17653	0.149394	2.48199e-16	1.48493e-14
ABCG1	37.6333	1.36766	0.172932	2.49319e-16	1.48493e-14
ANKRD36B	211.174	-0.969807	0.122743	3.15673e-16	1.85802e-14
SDCBP	67.508	1.35593	0.173871	3.84748e-16	2.23825e-14
ZNF506	300.3	1.2552	0.160364	4.08564e-16	2.34948e-14
PFN1	53.9829	-1.05631	0.13518	4.71229e-16	2.67905e-14
SNURF	31.5412	-1.15275	0.147412	5.39102e-16	3.03048e-14
COL16A1	21.3218	-1.20072	0.154816	7.15175e-16	3.97558e-14
MYH7B	89.5616	-1.45024	0.187186	7.53922e-16	4.14492e-14
PDCD6	42.9044	-0.896938	0.116591	1.15443e-15	6.27785e-14
H2AB1	12.9001	-1.70435	0.224197	1.30894e-15	7.04152e-14
MYH3	2791.88	1.18402	0.155261	1.4726e-15	7.83766e-14
PTMS	70.4519	-0.692197	0.0895729	1.60866e-15	8.4717e-14
TESC	233.99	0.895094	0.116612	1.90723e-15	9.93942e-14
FNDC1	42.6693	1.83223	0.242085	2.31498e-15	1.19401e-13
PAFAH1B2	59.9857	-0.714903	0.0935303	3.17498e-15	1.62086e-13
LDHB	120.326	1.11128	0.147513	5.06878e-15	2.56152e-13
PCBP1	109.449	0.78994	0.103936	5.26471e-15	2.63394e-13
ISLR	17.5362	-1.1314	0.151488	5.98433e-15	2.94745e-13
TAGLN	24.4088	-1.06185	0.141494	6.0092e-15	2.94745e-13
EBI3	153.778	-0.932056	0.12409	6.43124e-15	3.12383e-13
ARL15	29.7362	1.33334	0.177735	8.55184e-15	4.11393e-13
IFRD2	52.1934	-0.964856	0.128707	8.80577e-15	4.19574e-13
KIF1B	101.224	0.812101	0.108779	9.97088e-15	4.70607e-13
GUCD1	51.2255	1.05577	0.14238	1.31838e-14	6.16434e-13
INTS6	35.892	1.3266	0.180233	2.02945e-14	9.40124e-13
CKB	79.6677	-1.29836	0.1776	2.23479e-14	1.02575e-12
MYL12B	95.6498	-0.714776	0.0970362	2.7671e-14	1.25853e-12
ZFP37	91.1722	0.740442	0.100639	3.29931e-14	1.47962e-12
CACNG1	42.7555	-0.932825	0.12829	3.31235e-14	1.47962e-12
ZFP90	20.2319	-1.1891	0.163641	3.35511e-14	1.48545e-12
PPP2CA	49.7156	0.974088	0.133855	3.86166e-14	1.69473e-12
H4C15	19.5485	-1.35337	0.188068	4.24147e-14	1.84522e-12
NMRK2	25.1318	-1.20083	0.166898	4.72292e-14	2.03696e-12
MYO18A	43.2875	-0.84437	0.116672	5.73111e-14	2.45066e-12
CYP2A6	67.6106	-0.850197	0.118366	7.68428e-14	3.25801e-12
ZNF655	26.5918	-1.32531	0.186516	8.92523e-14	3.75235e-12
MYBPC1	261.545	1.24179	0.174656	9.23578e-14	3.85055e-12
IGFBP4	69.8277	-0.86569	0.121068	1.01913e-13	4.21382e-12
EMILIN1	34.5857	-0.81598	0.114647	1.12552e-13	4.61555e-12
GATD3A	24.1	-0.998004	0.140828	1.20811e-13	4.89601e-12
NOP53	30.1212	-0.874375	0.122782	1.21348e-13	4.89601e-12
GNG5	17.7725	-1.17226	0.166389	1.33738e-13	5.35271e-12
RHPN2	21.788	-1.03142	0.146568	1.36144e-13	5.40578e-12
CLDN25	21.7689	-1.01311	0.144447	1.45162e-13	5.71847e-12
ZNF346	55.8067	-0.668437	0.0935725	1.53021e-13	5.98096e-12
MAZ	112.86	0.608487	0.0853366	2.17172e-13	8.42259e-12
DKK1	41.0551	-0.840218	0.119536	2.3651e-13	9.102e-12
CCDC107	29.7201	-1.05073	0.15137	2.5012e-13	9.55231e-12
PTBP1	112.127	-0.826323	0.117412	2.55709e-13	9.69177e-12
CALR	53.004	-0.691312	0.0981449	2.77824e-13	1.04508e-11
POTEG	50.8702	0.973629	0.139131	2.88903e-13	1.07864e-11
TRIM51	81.4769	-0.535602	0.0757096	3.46926e-13	1.28568e-11
OR7A10	24.6734	-0.914577	0.131991	4.00862e-13	1.47464e-11
BCL2L2	82.2522	-0.725448	0.103924	4.72932e-13	1.72707e-11
UBE2S	18.1763	-1.27313	0.188348	5.7277e-13	2.0765e-11
SNRNP200	38.8335	0.983654	0.142025	5.82142e-13	2.09072e-11
GRAP2	28.9145	-0.820573	0.118818	5.85052e-13	2.09072e-11
ZNF267	100.996	0.835049	0.12054	6.98074e-13	2.47692e-11
NBPF14	51.7526	0.946404	0.137631	8.24915e-13	2.90637e-11
DIO3	29.9371	-0.937134	0.13844	1.25285e-12	4.38322e-11
MICALL2	658.213	-1.42011	0.209792	1.29947e-12	4.51475e-11
XRCC2	237.076	0.820193	0.120697	1.36498e-12	4.70964e-11
ATG13	21.219	-1.12146	0.166145	1.48258e-12	5.08038e-11
STOX2	44.563	0.96708	0.143133	1.79038e-12	6.0934e-11
BCAR1	31.7577	-0.898822	0.134086	1.86162e-12	6.29303e-11
TUB	27.8994	-1.06889	0.158689	1.8808e-12	6.31519e-11
RUNX3	40.4229	-0.721309	0.107045	2.08133e-12	6.94194e-11
ITGA5	42.6069	-0.735528	0.109731	2.1949e-12	7.27223e-11
INAVA	27.3768	-0.9523	0.142595	2.22157e-12	7.31219e-11
CAP2	55.7659	0.771661	0.114042	2.2875e-12	7.47997e-11
SMARCAD1	31.1436	1.11141	0.167224	3.7527e-12	1.21914e-10
GYS1	76.927	0.826662	0.123913	4.27073e-12	1.37848e-10
PIK3R2	17.9646	-1.08046	0.165791	4.95683e-12	1.58968e-10
MPST	14.9173	-1.02677	0.157876	5.26225e-12	1.67688e-10
DHRSX	32.9758	1.1825	0.180763	6.40561e-12	2.02831e-10
ACTA2	166.611	1.29144	0.200232	7.67039e-12	2.41352e-10
C6	32.922	-0.799415	0.122618	8.03664e-12	2.51296e-10
GSK3B	25.7273	1.24764	0.191686	8.59643e-12	2.6713e-10
POLR2E	88.1146	-0.541832	0.0819168	9.81346e-12	3.03066e-10
ZNF140	410.345	0.682081	0.104772	1.1176e-11	3.43027e-10
KRT28	82.3889	-0.759262	0.11663	1.19267e-11	3.63839e-10
QKI	100.689	0.687955	0.1058	1.21815e-11	3.69358e-10
SP7	344.045	-1.31133	0.203787	1.30386e-11	3.92964e-10
IFT88	32.3215	1.26656	0.197383	1.34081e-11	4.01681e-10
GRIP1	14.8066	1.81893	0.28036	1.38233e-11	4.11654e-10
DCK	36.9947	1.04766	0.162105	1.39171e-11	4.11996e-10
FSTL1	106.288	0.913765	0.142516	1.40333e-11	4.12992e-10
DDX17	150.004	0.745482	0.115241	1.42467e-11	4.1682e-10
CCDC51	117.922	1.50801	0.239671	1.52679e-11	4.44099e-10
ITM2C	55.8269	-0.674703	0.104454	1.66141e-11	4.80465e-10
LGALS1	69.2498	-0.645385	0.0999022	1.79996e-11	5.17539e-10
LENG1	377.213	-0.518739	0.0795147	1.85161e-11	5.29349e-10
NCOA1	48.0456	0.955924	0.15069	2.43406e-11	6.91909e-10
PIN1	21.4501	-1.10581	0.174941	2.67935e-11	7.57334e-10
RPRD1B	92.9658	-0.675117	0.10554	2.72144e-11	7.64908e-10
RAC3	26.8529	-0.81441	0.128562	2.7691e-11	7.73955e-10
MYH8	107.936	0.82237	0.129656	2.83987e-11	7.89327e-10
FOXG1	17.6314	-0.911505	0.145215	3.14292e-11	8.6873e-10
HEATR5A	31.5747	1.03886	0.164049	3.21718e-11	8.84371e-10
NREP	59.0284	0.981987	0.155713	3.23943e-11	8.85621e-10
PMFBP1	19.1874	-0.945482	0.151703	4.61775e-11	1.25558e-09
COL6A3	60.2896	-1.05828	0.170431	4.69441e-11	1.26952e-09
DOCK7	29.2443	1.44206	0.23361	5.00135e-11	1.34526e-09
CCR10	20.3654	-0.852678	0.137071	5.04099e-11	1.34867e-09
AK7	21.9576	-0.863167	0.139258	5.08832e-11	1.35409e-09
NPNT	83.3551	1.00883	0.163082	5.28513e-11	1.39902e-09
EPC1	87.8267	0.568162	0.0897226	5.90754e-11	1.55555e-09
PTPN21	31.6536	1.01287	0.161817	6.15202e-11	1.61144e-09
TIMP2	33.2445	-0.796043	0.128667	6.21541e-11	1.61957e-09
UROD	24.6548	-0.862518	0.140056	7.01467e-11	1.81836e-09
NAT8L	21.0543	-1.13132	0.186073	7.90627e-11	2.03892e-09
RIMKLA	29.5487	1.02315	0.165261	7.97305e-11	2.0456e-09
RPL23	45.102	-1.0769	0.175207	8.17037e-11	2.08553e-09
PCM1	46.133	0.841962	0.135755	8.29237e-11	2.10593e-09
CRIP2	57.8474	-0.91754	0.14861	8.38894e-11	2.11969e-09
MORF4L1	76.5196	0.680197	0.109444	9.33949e-11	2.34801e-09
NDUFA1	40.364	-0.9216	0.150179	9.48051e-11	2.37155e-09
KLC2	23.4501	-0.805823	0.132304	1.16111e-10	2.89006e-09
UQCRC2	61.1422	0.791994	0.128678	1.18502e-10	2.93041e-09
FBLN1	31.9971	-0.717557	0.117033	1.18903e-10	2.93041e-09
CDC42EP3	40.475	0.875542	0.142931	1.27175e-10	3.11891e-09
SKI	53.2062	0.801346	0.130409	1.28273e-10	3.13048e-09
SMR3A	30.2648	-0.891851	0.14731	1.31894e-10	3.20323e-09
RAF1	39.8132	0.814914	0.132556	1.42857e-10	3.44373e-09
STAU1	25.2173	1.07968	0.176952	1.43173e-10	3.44373e-09
C12orf57	136.757	0.668513	0.108932	1.47598e-10	3.53317e-09
EEF1D	74.6663	-0.543388	0.0881234	1.6949e-10	4.0379e-09
NICN1	29.1676	-0.750338	0.123705	1.78268e-10	4.2269e-09
RPS2	56.1611	-1.10604	0.183929	1.80908e-10	4.26926e-09
H3-4	19.1557	-0.983751	0.164294	1.83629e-10	4.31313e-09
TAX1BP3	24.0338	-0.779671	0.129963	2.15263e-10	5.03252e-09
ALG1L2	19.7781	-0.870644	0.145723	2.25869e-10	5.25591e-09
EHHADH	21.0768	1.23352	0.205286	2.27462e-10	5.26848e-09
ACTN4	37.8472	-0.650728	0.107503	2.36312e-10	5.44824e-09
DYNLL2	49.8159	0.812738	0.135455	2.46562e-10	5.65848e-09
SBK1	28.3291	-0.830762	0.139063	2.72177e-10	6.21782e-09
ZNF280C	27.4854	1.04158	0.174482	2.75892e-10	6.27404e-09
EIF4EBP2	36.8137	0.929544	0.155126	2.79032e-10	6.31673e-09
IFITM2	131.837	-0.506586	0.0832543	3.06149e-10	6.89406e-09
CDKN1B	29.1515	-0.783463	0.13166	3.07291e-10	6.89406e-09
RSF1	26.8852	1.03244	0.172675	3.18284e-10	7.10882e-09
THBS3	20.0653	-0.956596	0.162829	3.35244e-10	7.45434e-09
NOTCH3	27.956	-1.13456	0.194927	4.01366e-10	8.8851e-09
C9orf47	12.8364	-0.982451	0.168087	4.05938e-10	8.94674e-09
YIPF3	19.5337	1.35435	0.229351	4.10345e-10	9.00419e-09
GNA15	114.483	0.876349	0.148815	4.55476e-10	9.95086e-09
CFAP410	74.1734	-0.636786	0.107741	6.00641e-10	1.30652e-08
PRMT8	1902.52	-0.340478	0.0561274	6.68646e-10	1.44815e-08
ZNF391	97.3939	0.505337	0.0849435	7.77707e-10	1.6771e-08
HMGCLL1	34.0196	-0.682702	0.117153	8.15485e-10	1.75102e-08
KANK3	48.9357	-0.631898	0.107907	8.29921e-10	1.7744e-08
CA3	279.683	1.29567	0.229913	9.36095e-10	1.99289e-08
TAFA4	32.6652	0.900205	0.155853	1.05634e-09	2.23936e-08
C15orf48	25.3546	-0.856009	0.149957	1.12017e-09	2.36465e-08
RCN3	14.3042	-0.937536	0.165443	1.18115e-09	2.47338e-08
DTX3	22.3394	-0.767861	0.13403	1.18157e-09	2.47338e-08
COL4A1	56.4615	0.764103	0.132354	1.18743e-09	2.4753e-08
IFI6	87.6293	-0.631843	0.108301	1.21396e-09	2.5201e-08
CACNA1S	55.8073	0.823925	0.143732	1.34714e-09	2.78501e-08
MYL9	613.237	0.885056	0.156324	1.37879e-09	2.83872e-08
ATP5F1D	28.5394	-0.898111	0.157775	1.40123e-09	2.87309e-08
DELE1	51.6491	-0.854494	0.149588	1.42243e-09	2.90465e-08
ATP1B1	48.0279	-0.704591	0.122967	1.43408e-09	2.91655e-08
GPR87	43.4529	0.92868	0.164089	1.48492e-09	3.00771e-08
HGF	181.194	0.705639	0.123075	1.53732e-09	3.10129e-08
MYL1	509.912	0.944031	0.1681	1.63837e-09	3.29187e-08
PPIH	19.2605	-0.823831	0.145988	1.65076e-09	3.29428e-08
POLR2J2	19.9052	-0.830382	0.147293	1.65274e-09	3.29428e-08
PTGFRN	29.2563	-1.05011	0.187048	1.6645e-09	3.30455e-08
HMX1	59.9581	-0.596574	0.10399	1.76195e-09	3.4842e-08
DDX19A	37.1355	0.925258	0.16342	1.77619e-09	3.49435e-08
IL25	13.7528	-1.01085	0.181083	1.78105e-09	3.49435e-08
CARD9	85.2397	-0.548111	0.0946919	1.80624e-09	3.52994e-08
VPS16	13.7365	-0.925777	0.165533	2.00729e-09	3.90758e-08
BMERB1	59.1369	-0.618321	0.108904	2.20584e-09	4.27745e-08
TACC2	43.3362	0.741414	0.130212	2.24496e-09	4.33651e-08
FGF11	23.7904	-0.786204	0.140612	2.4212e-09	4.65509e-08
SLC2A5	19.5455	-1.00153	0.181196	2.4285e-09	4.65509e-08
GPAT2	22.4036	-0.805527	0.144779	2.6716e-09	5.10153e-08
RGL4	28.5051	0.936651	0.167133	2.77279e-09	5.27463e-08
CDKN1A	130.063	0.835909	0.151371	3.3122e-09	6.27687e-08
ZC3H11A	38.6717	0.765325	0.136676	3.54962e-09	6.70142e-08
TMEM209	30.0554	0.877599	0.157519	3.62263e-09	6.81354e-08
GPR82	26.3848	0.930749	0.166698	3.65468e-09	6.84807e-08
NPIPB6	64.9177	0.709523	0.126983	3.77362e-09	7.04455e-08
EIF3E	52.0663	0.67696	0.120521	3.85508e-09	7.14548e-08
SMOC2	32.3777	0.955484	0.173382	3.85625e-09	7.14548e-08
RPL14	44.4045	-0.60768	0.108738	3.90096e-09	7.20167e-08
GNAI3	21.6591	-0.761085	0.138923	4.52856e-09	8.32956e-08
IL11RA	17.8708	-0.864262	0.157958	4.83786e-09	8.86586e-08
HNRNPR	39.5135	0.784266	0.142584	5.59902e-09	1.02233e-07
FNDC3B	54.6785	0.705954	0.12838	6.03461e-09	1.09566e-07
ATP1A2	47.7802	0.754154	0.136526	6.05388e-09	1.09566e-07
GK2	28.3392	-0.710254	0.129603	6.06632e-09	1.09566e-07
FOXD4L1	14.1349	-1.47967	0.277518	6.17078e-09	1.11052e-07
PPP5C	41.1332	0.889952	0.163731	6.2057e-09	1.1128e-07
PARP14	25.9189	-0.695383	0.127669	6.28571e-09	1.12312e-07
MRPL33	27.9789	-0.679963	0.124326	6.69307e-09	1.19165e-07
GFRA3	28.7356	0.968418	0.178486	6.83864e-09	1.21325e-07
CRYAB	346.348	0.736481	0.135654	7.16458e-09	1.26659e-07
TMSB10	70.3641	-0.674828	0.123335	7.24841e-09	1.27689e-07
LONP1	13.1334	-0.941298	0.176765	8.6735e-09	1.52258e-07
HECTD4	39.0664	0.712116	0.130332	8.74283e-09	1.52938e-07
OR10R2	19.4119	1.06187	0.196052	8.82925e-09	1.53502e-07
LAIR1	16.1916	-1.06844	0.201482	8.83643e-09	1.53502e-07
BOC	43.7142	-0.738805	0.136704	9.38178e-09	1.62412e-07
MAP4	73.7286	0.700784	0.129002	9.44962e-09	1.6274e-07
SLC12A4	42.2905	0.735255	0.135723	9.46581e-09	1.6274e-07
ATP2A3	48.8671	-0.809142	0.150103	9.97989e-09	1.70991e-07
DEFA1B	32.1481	1.21563	0.231131	1.04326e-08	1.78138e-07
RPL18	90.0106	-0.903834	0.16876	1.05034e-08	1.7816e-07
CFHR3	22.1195	1.07105	0.198794	1.05052e-08	1.7816e-07
VPS72	26.1348	-0.697264	0.130054	1.17875e-08	1.99233e-07
ZNF207	49.1757	0.750463	0.13989	1.23137e-08	2.07427e-07
CGB2	12.8233	-2.43825	0.15411	1.29234e-08	2.16966e-07
HMGN2	49.0397	-0.599287	0.111222	1.35344e-08	2.26464e-07
NEXN	39.0941	0.742975	0.138548	1.51231e-08	2.52203e-07
HACL1	31.9113	0.838761	0.157786	1.57275e-08	2.61411e-07
WDR44	42.2312	0.685605	0.128445	1.70272e-08	2.82076e-07
GPR27	12.8884	-0.893893	0.172146	1.71752e-08	2.8359e-07
DPYSL3	36.2426	0.784881	0.148121	1.76405e-08	2.90313e-07
RPLP1	76.7646	-1.53635	0.296429	1.82041e-08	2.98607e-07
EWSR1	50.4991	0.612184	0.114551	2.13078e-08	3.48376e-07
ZFP1	62.9611	0.591099	0.110967	2.17668e-08	3.54721e-07
KRTAP12-3	19.9217	-0.866741	0.1674	2.21377e-08	3.59594e-07
RASSF10	25.4481	1.01463	0.195646	2.27875e-08	3.68223e-07
INPPL1	55.7432	0.671003	0.126878	2.28161e-08	3.68223e-07
ZBTB10	26.0367	0.927339	0.177978	2.29643e-08	3.69423e-07
PDZRN3	40.5502	0.79512	0.151439	2.30908e-08	3.70266e-07
ST6GALNAC3	28.2166	-0.629644	0.120603	2.43261e-08	3.88829e-07
GATD1	25.1863	-0.663985	0.126898	2.46197e-08	3.92268e-07
RAPGEF1	53.7329	0.577945	0.108936	2.70761e-08	4.30037e-07
APC2	12.2398	-0.870732	0.170022	2.77204e-08	4.38185e-07
CCT3	42.1306	0.699017	0.133165	2.77642e-08	4.38185e-07
CSDE1	96.2726	0.502974	0.0943078	2.80024e-08	4.40554e-07
KIF2A	30.4912	0.942514	0.182904	2.85693e-08	4.48064e-07
ENAH	46.6692	0.652696	0.124091	2.91002e-08	4.54963e-07
MB	188.568	-0.8547	0.165203	3.14729e-08	4.90526e-07
ANTXR2	41.3672	0.742655	0.142684	3.19132e-08	4.95844e-07
PIK3C2A	28.5253	-0.621953	0.119619	3.23376e-08	5.00883e-07
KCNG2	13.3832	-0.843858	0.165373	3.30139e-08	5.09779e-07
TIE1	13.4413	-0.867333	0.170152	3.39938e-08	5.23295e-07
USE1	20.9065	-0.737256	0.143816	3.47383e-08	5.33116e-07
AHNAK	89.7738	-0.540624	0.102576	3.50846e-08	5.36783e-07
OLR1	49.0581	1.22183	0.243982	3.55149e-08	5.40492e-07
BRK1	35.5614	-0.584519	0.112391	3.5543e-08	5.40492e-07
GNPTG	15.5685	-0.859429	0.169584	3.64124e-08	5.52034e-07
ARFGEF1	29.2317	0.851437	0.165624	3.70329e-08	5.59745e-07
LGALS3BP	15.711	-1.04136	0.208742	3.83583e-08	5.78031e-07
FSCN1	27.3435	-0.833104	0.1632	3.93719e-08	5.91524e-07
TBC1D3C	36.0222	-0.562048	0.108317	3.99038e-08	5.9772e-07
TOX4	33.4871	0.7244	0.139677	4.0601e-08	6.06349e-07
C22orf23	25.2546	-0.726649	0.142166	4.32577e-08	6.44102e-07
SEPTIN9	49.3559	-0.544719	0.104598	4.44242e-08	6.59508e-07
ZNF28	25.8181	-0.9825	0.19607	4.64469e-08	6.87496e-07
EPN1	31.2435	-0.762655	0.149728	4.6729e-08	6.89632e-07
H4C1	159.052	-0.328277	0.0615384	4.81261e-08	7.08162e-07
FHL3	18.9493	-0.745853	0.147611	5.06811e-08	7.43571e-07
SEC61G	41.7516	0.69181	0.134634	5.30682e-08	7.76317e-07
TMEM170A	48.1322	-0.618489	0.120897	5.59981e-08	8.16788e-07
COL5A2	85.4358	0.772301	0.153655	5.81207e-08	8.45285e-07
MAP2K1	72.0667	1.08804	0.222004	5.86176e-08	8.5004e-07
SVIL	70.112	0.652619	0.128359	6.35174e-08	9.18432e-07
ADSL	33.5212	0.744569	0.146662	6.44004e-08	9.28516e-07
AGRN	25.015	-0.802509	0.161434	6.51662e-08	9.36858e-07
ATG4D	21.6419	0.898274	0.17758	6.57694e-08	9.42821e-07
MACF1	77.935	0.931039	0.188318	6.66569e-08	9.50316e-07
FGF14	25.7461	0.941922	0.187555	6.66721e-08	9.50316e-07
SHD	27.8903	-0.965592	0.194819	6.99158e-08	9.93719e-07
ARHGEF25	22.2902	-0.690974	0.137994	7.57101e-08	1.07302e-06
SCT	47.4864	-0.539912	0.105813	7.70465e-08	1.08888e-06
SHARPIN	14.8697	-0.838931	0.170228	8.12366e-08	1.14486e-06
SEMA3G	20.5974	-0.777942	0.157233	8.27237e-08	1.16255e-06
CRKL	18.8737	-0.73083	0.148067	9.09647e-08	1.27395e-06
CCT5	39.7555	0.723783	0.144706	9.11605e-08	1.27395e-06
POP7	27.4188	0.813037	0.162663	9.18146e-08	1.27952e-06
HAS2	26.0508	1.11427	0.226533	9.65158e-08	1.3413e-06
PCDH11X	34.3843	0.844802	0.171054	9.77122e-08	1.35417e-06
SNHG32	33.9776	0.713529	0.142137	9.94017e-08	1.37378e-06
RPS6KB1	74.0127	-0.49245	0.0970635	1.02007e-07	1.40305e-06
KIRREL2	26.483	-0.716237	0.146079	1.02081e-07	1.40305e-06
ATP1B4	58.4345	0.600604	0.119105	1.07595e-07	1.47223e-06
OSBPL2	75.7616	0.670854	0.134135	1.07703e-07	1.47223e-06
SLC27A4	25.5634	-0.748197	0.152019	1.12987e-07	1.54025e-06
MEX3A	26.8594	0.812022	0.163605	1.15404e-07	1.56893e-06
FHIP1B	26.7214	0.882855	0.179445	1.17055e-07	1.58706e-06
NUDT3	16.1198	-0.894914	0.184085	1.23335e-07	1.66769e-06
JPT1	85.3055	0.606179	0.121076	1.26566e-07	1.70676e-06
SGCB	46.6384	0.612955	0.122689	1.2899e-07	1.73477e-06
C1QL2	85.3724	0.920031	0.190943	1.317e-07	1.76648e-06
CYP4Z1	26.7065	-0.81951	0.169302	1.38198e-07	1.84868e-06
PMF1	18.6222	-0.938599	0.194502	1.44144e-07	1.92307e-06
WT1	25.4026	0.803304	0.163791	1.45942e-07	1.94189e-06
CLIC1	21.8247	-0.677489	0.13955	1.52407e-07	2.02253e-06
APH1B	16.9489	-0.772164	0.160431	1.57977e-07	2.0909e-06
TTYH3	92.8879	-0.579059	0.116734	1.64581e-07	2.1671e-06
LRP4	32.2762	0.699626	0.142344	1.64601e-07	2.1671e-06
SHANK1	36.2677	-0.5557	0.112752	1.78529e-07	2.34139e-06
NDUFAB1	22.9752	-0.752032	0.155528	1.78775e-07	2.34139e-06
MYH10	45.5728	0.694832	0.142585	1.80866e-07	2.35879e-06
COL1A1	765.49	-1.092	0.228141	1.81046e-07	2.35879e-06
XIRP2	52.6229	1.30817	0.176822	1.82019e-07	2.3653e-06
MICOS13	25.0134	-0.658171	0.135731	1.83503e-07	2.3784e-06
ROBO3	15.729	-0.852978	0.178141	1.92031e-07	2.48251e-06
CBL	39.0748	0.648247	0.131921	1.928e-07	2.48603e-06
DIO1	39.1606	0.835061	0.173556	1.94283e-07	2.49733e-06
NPM1	67.1277	0.676653	0.138945	1.94675e-07	2.49733e-06
USO1	63.4123	0.601109	0.122439	2.06279e-07	2.63942e-06
CHD4	63.6421	0.570393	0.116393	2.17856e-07	2.78045e-06
MRC2	23.2591	-0.894343	0.189761	2.29528e-07	2.92108e-06
H1-4	22.4104	-0.759274	0.159289	2.30043e-07	2.92108e-06
TUBB2B	49.1047	-0.599871	0.123201	2.31666e-07	2.93424e-06
CTNNB1	52.1634	0.640267	0.132784	2.35562e-07	2.97605e-06
LMOD3	44.916	0.62967	0.129976	2.37282e-07	2.98895e-06
GZF1	17.1641	-0.722641	0.152339	2.37778e-07	2.98895e-06
GPR141	28.2842	-0.680875	0.141878	2.38683e-07	2.99281e-06
HNRNPK	50.2221	0.602628	0.12332	2.41238e-07	3.01728e-06
MEX3D	19.1717	-0.685968	0.143761	2.42213e-07	3.02193e-06
NDUFA13	22.0267	-0.790065	0.16714	2.44679e-07	3.04093e-06
ASH1L	22.5997	0.9482	0.197417	2.44952e-07	3.04093e-06
CEACAM5	35.9023	0.926753	0.195454	2.48479e-07	3.07708e-06
GOLGA8S	14.5986	-0.801557	0.170055	2.5023e-07	3.09111e-06
CUEDC2	20.288	0.936211	0.196222	2.60292e-07	3.20749e-06
ECPAS	59.0522	0.635304	0.131293	2.68287e-07	3.29178e-06
UBE3A	30.8574	0.718174	0.14968	2.68448e-07	3.29178e-06
ALG2	33.3929	-0.892647	0.18953	2.70521e-07	3.30909e-06
PNISR	52.2857	0.538706	0.110408	2.94087e-07	3.58858e-06
RAD23A	31.845	-0.600702	0.125663	3.43762e-07	4.18453e-06
EIF3L	39.7954	-0.664684	0.139697	3.4577e-07	4.19876e-06
CASP12	36.477	-0.817188	0.175239	3.60331e-07	4.36498e-06
PHLDA3	28.876	-0.710488	0.152322	3.6235e-07	4.37883e-06
MYL5	37.4692	-0.615753	0.129472	3.6387e-07	4.38661e-06
ZNF334	52.9076	0.601577	0.125506	3.73964e-07	4.49746e-06
SPNS3	21.6975	-0.709035	0.152744	3.84363e-07	4.61143e-06
ZNF530	22.1081	-0.727991	0.155452	3.96574e-07	4.74656e-06
PET117	45.269	0.596778	0.125334	4.06684e-07	4.85595e-06
CLEC12B	25.6274	0.749398	0.158435	4.12011e-07	4.90783e-06
KTN1	45.2075	0.572694	0.119924	4.25438e-07	5.05573e-06
GRIN2A	62.9595	0.792119	0.1712	4.27661e-07	5.07012e-06
AGL	57.344	0.511812	0.106322	4.46057e-07	5.27571e-06
KIRREL1	13.0212	-0.788916	0.171631	4.51856e-07	5.33168e-06
UBE2L3	45.8205	0.637523	0.135462	4.58807e-07	5.40096e-06
PPP2R3B	46.6716	-0.746241	0.160477	4.61638e-07	5.41253e-06
RTL8C	137.483	-0.573437	0.120361	4.61953e-07	5.41253e-06
SMIM17	376.508	0.632248	0.135007	4.6484e-07	5.43363e-06
CDYL	17.6339	-1.03932	0.227794	4.68714e-07	5.46615e-06
TRIM74	16.0536	-0.954234	0.210618	4.69847e-07	5.46661e-06
ZXDC	29.1206	0.751375	0.160903	4.9267e-07	5.71517e-06
RBM12B	24.7967	0.798073	0.171526	4.93495e-07	5.71517e-06
RPLP2	53.5303	-0.73398	0.157784	5.21174e-07	6.02179e-06
TMOD1	55.0707	0.575034	0.121545	5.29678e-07	6.10594e-06
HLA-G	27.886	1.02773	0.226383	5.31687e-07	6.11501e-06
BRINP3	13.3293	-0.847729	0.185943	5.35484e-07	6.14456e-06
HIPK1	25.6645	0.775001	0.167058	5.61454e-07	6.42781e-06
AKAP6	36.1308	0.734963	0.15847	5.66915e-07	6.47551e-06
C4orf54	74.6006	0.825587	0.18237	5.98035e-07	6.81542e-06
ADGRL2	40.8914	0.739453	0.16053	5.99721e-07	6.8191e-06
DMWD	29.7673	-0.615989	0.133049	6.06407e-07	6.87949e-06
ZNF609	41.1584	0.886405	0.196032	6.09887e-07	6.90331e-06
CSTF3	46.1869	-0.500914	0.106264	6.17557e-07	6.97435e-06
SPIN2A	30.1818	-0.641865	0.139327	6.19528e-07	6.98086e-06
CSKMT	14.8305	-0.728912	0.160683	6.23522e-07	7.01007e-06
NAT8	27.7667	-0.618214	0.133729	6.58528e-07	7.38704e-06
CMA1	31.2219	-0.632125	0.137243	6.87331e-07	7.69288e-06
BASP1	116.555	-0.669806	0.145731	6.92949e-07	7.73845e-06
ATP2A1	65.6482	-0.749156	0.163881	7.24249e-07	8.06997e-06
CERCAM	16.4008	-0.75475	0.166287	7.2802e-07	8.09397e-06
INTS2	17.3755	0.973437	0.214323	7.30254e-07	8.1008e-06
ANXA5	38.6585	0.578234	0.123627	7.43929e-07	8.23424e-06
OST4	28.3502	-0.779289	0.173818	7.55283e-07	8.34146e-06
GMCL1	19.1708	-0.735294	0.163675	7.81636e-07	8.61349e-06
OTUD7A	12.9236	-1.07093	0.245962	8.09405e-07	8.89989e-06
TACR3	23.0243	0.928027	0.20726	8.15379e-07	8.94472e-06
H4C8	18.0848	-0.706717	0.155712	8.17328e-07	8.94472e-06
MYADM	67.3806	0.703993	0.154764	8.18845e-07	8.94472e-06
ZFAND3	63.1191	0.601312	0.130976	8.40808e-07	9.16462e-06
OXA1L	18.9228	-0.70967	0.157969	8.47305e-07	9.21537e-06
AGO1	22.805	-0.611176	0.134017	8.70928e-07	9.45174e-06
H3C13	46.8602	-0.485764	0.105002	8.99517e-07	9.74087e-06
PVRIG	20.4244	-0.675218	0.149766	9.2308e-07	9.97445e-06
OTUD5	22.7296	0.808021	0.178513	9.42928e-07	1.0167e-05
APOA2	19.3899	-0.656684	0.14543	9.91447e-07	1.06671e-05
NBR1	33.0937	0.645209	0.141077	1.02689e-06	1.10247e-05
CXCR4	26.1722	-0.638521	0.142046	1.03203e-06	1.10562e-05
LRP6	42.108	0.622904	0.136432	1.05506e-06	1.12787e-05
TLE5	172.607	0.599889	0.132166	1.07015e-06	1.14156e-05
CARD11	75.4482	-0.405327	0.0870707	1.11224e-06	1.18271e-05
RFX2	28.5233	-0.65046	0.144282	1.11345e-06	1.18271e-05
H2BC4	14.7438	-0.801456	0.183261	1.16747e-06	1.23652e-05
CRELD1	36.1562	0.62771	0.138281	1.16905e-06	1.23652e-05
FKBP10	45.8563	-0.4719	0.103134	1.18144e-06	1.24699e-05
SELENOO	15.7666	-0.911443	0.208949	1.1951e-06	1.25876e-05
PTCD3	41.8423	0.626309	0.138956	1.20511e-06	1.26663e-05
NRBP2	23.7917	-0.648633	0.14541	1.21865e-06	1.27817e-05
ACTA1	665.813	-0.753176	0.168535	1.23249e-06	1.28999e-05
FNBP1L	49.075	0.790857	0.17975	1.24752e-06	1.303e-05
MTMR10	31.8591	0.654113	0.145081	1.25377e-06	1.30679e-05
SNCA	55.9827	1.04599	0.245276	1.29528e-06	1.34725e-05
CCT7	32.8896	-0.534122	0.11815	1.30923e-06	1.35893e-05
NME4	20.3384	-0.758922	0.172614	1.36018e-06	1.4089e-05
FADS3	37.0302	0.594381	0.131248	1.374e-06	1.41929e-05
DAOA	104.098	-0.321025	0.0684929	1.37588e-06	1.41929e-05
GTF2I	48.9621	0.535978	0.117939	1.41022e-06	1.45172e-05
RNF113A	76.566	0.428824	0.0929406	1.42356e-06	1.46244e-05
ABI3BP	28.5416	0.84827	0.192359	1.45315e-06	1.48978e-05
CCDC88B	127.463	-0.394711	0.0854852	1.48061e-06	1.51483e-05
FGFR4	16.2663	-0.754084	0.173158	1.54875e-06	1.5813e-05
B2M	54.0146	0.596627	0.133749	1.63416e-06	1.66511e-05
S100A16	13.2475	-0.74752	0.173495	1.74424e-06	1.77367e-05
RDH13	94.3444	-0.342731	0.0741401	1.7814e-06	1.80778e-05
ACTR10	32.7267	-0.521541	0.116503	1.79961e-06	1.82236e-05
RARA	28.4742	-0.584087	0.13239	1.80305e-06	1.82236e-05
TJAP1	17.7015	-0.713888	0.164584	1.87902e-06	1.89531e-05
RAPH1	25	0.707844	0.160863	2.02924e-06	2.04271e-05
SCHIP1	29.6169	0.715579	0.163114	2.04081e-06	2.05024e-05
DOC2A	34.0463	0.861349	0.200828	2.06854e-06	2.07012e-05
CT47A10	34.8616	0.9362	0.222115	2.06888e-06	2.07012e-05
CYSRT1	20.9296	-0.626083	0.144376	2.09166e-06	2.08873e-05
CKMT2	37.0301	-0.789622	0.183085	2.13668e-06	2.12944e-05
UPK1B	55.361	1.20868	0.294542	2.15007e-06	2.13853e-05
IL19	21.1055	-0.64829	0.149755	2.19275e-06	2.17666e-05
HES4	13.641	-0.757239	0.178181	2.26166e-06	2.24061e-05
MACROH2A1	18.2285	-0.704738	0.163902	2.26678e-06	2.24124e-05
WDR20	27.0907	0.687709	0.156919	2.28462e-06	2.25443e-05
GP1BB	15.9815	-0.805885	0.188384	2.29637e-06	2.26157e-05
JOSD2	69.6641	-0.696769	0.161087	2.31985e-06	2.28019e-05
JSRP1	21.8503	-0.698727	0.161534	2.35833e-06	2.31347e-05
PABPC4	59.2944	0.550556	0.125184	2.54735e-06	2.49401e-05
SLC22A23	22.3342	-0.594181	0.137358	2.5553e-06	2.4969e-05
MAPK10	14.4902	-0.815586	0.192527	2.65485e-06	2.58912e-05
CHRNA1	130.485	0.788787	0.187704	2.72083e-06	2.64831e-05
SRP9	30.0145	-0.537308	0.123384	2.80109e-06	2.72114e-05
DDX23	24.3065	-0.591072	0.1376	2.81334e-06	2.72774e-05
MAP3K14	20.3382	-0.626044	0.146579	2.8243e-06	2.73307e-05
PTGS1	15.4489	-0.694322	0.164131	2.96747e-06	2.86607e-05
NEBL	82.5224	0.883523	0.21226	3.01695e-06	2.90824e-05
CUL4B	24.5059	-0.558844	0.129292	3.03079e-06	2.91597e-05
USF2	43.8768	0.754577	0.178233	3.04758e-06	2.9265e-05
YJEFN3	24.5265	-0.598381	0.140155	3.05598e-06	2.92894e-05
ATG14	30.1873	0.646567	0.150109	3.07437e-06	2.94093e-05
STARD4	22.0678	-0.664864	0.157506	3.12753e-06	2.98607e-05
OR2T34	14.4432	-0.844571	0.202989	3.13725e-06	2.98965e-05
PHB2	20.736	-0.708379	0.16741	3.16065e-06	3.00622e-05
IMPA2	13.9555	-0.734607	0.175123	3.17171e-06	3.01102e-05
MAST1	24.5555	0.841628	0.200288	3.17869e-06	3.01192e-05
TCF25	29.0718	-0.674598	0.158713	3.26419e-06	3.0871e-05
NPAP1L	38.8282	-0.527374	0.121451	3.49568e-06	3.29979e-05
POGLUT3	22.3336	0.744786	0.174979	3.61708e-06	3.40796e-05
RANBP9	29.8376	0.630721	0.146366	3.66218e-06	3.44396e-05
GBA	29.033	0.710919	0.168036	3.83242e-06	3.5973e-05
TMEM38A	35.8253	-0.600001	0.14146	3.84393e-06	3.60134e-05
ANTKMT	26.4614	-0.566866	0.132709	3.86499e-06	3.61431e-05
ZNF254	16.5177	-0.691093	0.165621	3.89253e-06	3.63327e-05
BTF3	64.8825	0.500163	0.115351	3.9265e-06	3.65815e-05
STUB1	21.2998	-0.699285	0.168671	3.97068e-06	3.69244e-05
ATP6V0E1	33.7322	0.60808	0.142575	4.21878e-06	3.91588e-05
ZC3H7B	24.1706	-0.621702	0.148075	4.27402e-06	3.9598e-05
SARDH	29.4116	-0.518705	0.12132	4.3018e-06	3.97817e-05
AP2B1	30.2629	0.624531	0.146859	4.39156e-06	4.05369e-05
FBXL17	24.4552	0.682862	0.161357	4.5882e-06	4.22739e-05
CACNG6	19.5915	-0.679857	0.164456	4.62249e-06	4.25116e-05
RTN2	17.8815	-0.751865	0.183543	4.67695e-06	4.29335e-05
ZMYM2	28.9255	0.66755	0.158614	4.76301e-06	4.36435e-05
MDM2	31.1189	0.758668	0.183518	4.77811e-06	4.37018e-05
MAGEA12	14.978	-0.758159	0.184859	4.79302e-06	4.37582e-05
SH3BGR	41.9085	0.567577	0.133192	4.80758e-06	4.38111e-05
SHFL	22.8922	-0.55794	0.132111	4.87199e-06	4.43174e-05
CLSTN2	44.9608	0.687596	0.16578	4.896e-06	4.44549e-05
GNL3	21.2997	-0.597748	0.143402	4.90809e-06	4.4484e-05
NASP	23.1262	-0.641572	0.154329	4.95314e-06	4.47325e-05
IGFBP5	128.161	-0.542461	0.127256	4.95339e-06	4.47325e-05
PPP3CB	44.8293	0.495485	0.115048	5.10818e-06	4.60473e-05
HSPB6	28.956	-0.759278	0.183968	5.1584e-06	4.64097e-05
ZNF524	15.3193	-0.665191	0.161619	5.16694e-06	4.64097e-05
SON	38.3796	0.577324	0.136273	5.2524e-06	4.70159e-05
MAPK1	39.3142	0.563908	0.132589	5.25323e-06	4.70159e-05
RANBP2	25.6276	-0.525372	0.124654	5.3881e-06	4.81369e-05
SETD3	31.7525	0.634241	0.151224	5.5601e-06	4.9585e-05
IRGC	26.1342	-0.598975	0.144313	5.79782e-06	5.1613e-05
DAAM2	15.0495	-0.663437	0.162741	5.88775e-06	5.23204e-05
ZNF580	16.1347	-0.688321	0.170098	6.04559e-06	5.36278e-05
SHMT2	42.7977	0.528285	0.124633	6.07396e-06	5.37841e-05
C4orf46	168.168	0.494831	0.116984	6.11179e-06	5.40235e-05
CDK6	23.3065	0.725349	0.175966	6.28151e-06	5.54258e-05
RPL11	25.6814	-1.00597	0.253127	6.31749e-06	5.56451e-05
SPG7	46.7897	-0.457715	0.108178	6.57591e-06	5.78108e-05
VSIG8	36.0499	-0.454631	0.107333	6.58647e-06	5.78108e-05
FGFRL1	50.3618	-0.737678	0.180893	6.68334e-06	5.85582e-05
TEX48	11.6112	-1.13504	0.289176	6.76416e-06	5.91237e-05
ZNF423	22.505	-0.621739	0.151836	6.77151e-06	5.91237e-05
DLGAP4	44.5357	0.483621	0.114344	7.15119e-06	6.22758e-05
CDR2	39.308	0.561801	0.134431	7.15743e-06	6.22758e-05
PRELID3B	122.888	-0.423291	0.0994301	7.21505e-06	6.26682e-05
TSPAN13	43.647	0.527388	0.12577	7.35308e-06	6.37564e-05
PLEKHM2	27.0807	0.650697	0.158479	7.63663e-06	6.61005e-05
PDAP1	37.0041	-0.496078	0.11931	7.80148e-06	6.74107e-05
PABPC1	38.0053	-0.731299	0.182265	7.81681e-06	6.74268e-05
CSK	24.2126	-0.827353	0.210178	7.85412e-06	6.7632e-05
FBXW11	30.0472	-0.503691	0.121571	7.91408e-06	6.80024e-05
GUK1	21.4498	-0.568617	0.139311	7.92432e-06	6.80024e-05
MAU2	17.2114	-0.65055	0.161596	8.11181e-06	6.94921e-05
ZNF586	42.9185	0.541759	0.130257	8.42477e-06	7.20498e-05
BNIP3L	38.5103	-0.466501	0.111677	8.49006e-06	7.24843e-05
CCDC70	22.188	-0.544067	0.133026	8.72487e-06	7.42513e-05
ITPRID2	164.917	-0.271081	0.0623733	8.72671e-06	7.42513e-05
HMGA2	12.188	-0.731485	0.185241	8.83711e-06	7.50629e-05
ZNF528	42.7482	0.512143	0.123333	9.59801e-06	8.13879e-05
EPDR1	25.0027	-0.607268	0.149953	9.80988e-06	8.30437e-05
MDK	25.2162	-0.682001	0.172145	9.95306e-06	8.41134e-05
APLP2	35.4286	0.548859	0.133663	1.01583e-05	8.5703e-05
SSC5D	17.5463	-0.731257	0.185897	1.02206e-05	8.60834e-05
PLEKHJ1	21.982	-0.606637	0.150878	1.03983e-05	8.74327e-05
UBR4	40.5938	0.562703	0.138128	1.04302e-05	8.75545e-05
SLC35B1	19.4362	-0.84106	0.218273	1.05515e-05	8.84244e-05
PFKL	37.8902	0.580572	0.142586	1.07905e-05	9.02753e-05
TNFAIP1	32.5749	-0.523958	0.12949	1.08488e-05	9.0612e-05
ATP5MC3	80.992	-0.675733	0.168703	1.09065e-05	9.09421e-05
SULF1	57.4983	-0.713175	0.179651	1.09998e-05	9.15677e-05
FXR1	43.2308	-0.444754	0.107626	1.10356e-05	9.17131e-05
PTPN23	32.1051	0.568147	0.139278	1.11642e-05	9.26278e-05
SDC3	27.1671	-0.492108	0.121043	1.20454e-05	9.97735e-05
H2BC18	16.1491	-0.695221	0.179109	1.23938e-05	0.00010249
GJC3	31.8704	-0.489845	0.12068	1.24822e-05	0.00010305
ECH1	29.6535	-0.611441	0.153819	1.25837e-05	0.000103717
CCSER2	35.3391	0.57776	0.143381	1.27231e-05	0.000104694
SLC35E4	34.8897	0.774398	0.200146	1.34008e-05	0.000110089
PRRC1	42.8192	0.49291	0.121429	1.3592e-05	0.000111412
TSC22D4	23.0193	-0.574575	0.144498	1.36064e-05	0.000111412
PSTPIP1	26.6923	0.632696	0.15848	1.36926e-05	0.000111927
CHP1	25.7921	-0.512173	0.127981	1.3714e-05	0.000111927
CAMK2G	25.497	0.685239	0.173284	1.39048e-05	0.000113299
C17orf97	30.0754	0.846814	0.223064	1.41653e-05	0.000115235
RAD21	46.7929	0.497001	0.122485	1.43194e-05	0.000116298
PLEC	167.261	0.314225	0.0748965	1.49681e-05	0.00012137
APTX	21.4506	-0.542129	0.13677	1.51229e-05	0.000122413
PDCD4	246.019	-0.398735	0.0970005	1.51456e-05	0.000122413
TPRA1	34.423	-0.510476	0.127549	1.526e-05	0.000123138
FARP1	33.7574	0.544854	0.136099	1.58429e-05	0.000127636
CDH13	27.6783	0.591365	0.148445	1.61953e-05	0.000130265
ITPKB	22.1393	-1.0149	0.271279	1.62677e-05	0.000130637
AEBP2	32.9321	0.572052	0.143991	1.63053e-05	0.00013073
CRABP2	59.3653	-0.494659	0.123458	1.65942e-05	0.000132833
PLAUR	21.9912	-0.63226	0.164074	1.67231e-05	0.000133651
DCAF12L1	31.2575	1.15929	0.319614	1.70462e-05	0.000136016
FN1	78.2729	0.764091	0.2028	1.72828e-05	0.000137684
SMIM40	59.1854	-0.392032	0.0961976	1.73645e-05	0.000138116
RASAL3	31.7143	0.808547	0.216942	1.76745e-05	0.000140358
HR	14.9134	-0.75118	0.199461	1.7847e-05	0.000141503
KRT76	12.6663	-0.689008	0.18121	1.79139e-05	0.000141809
RPS16	49.0265	-0.614976	0.158247	1.80165e-05	0.000142312
ZNF721	30.9154	0.571324	0.144134	1.80343e-05	0.000142312
RNASEH2C	14.1652	-0.640315	0.166781	1.81362e-05	0.00014289
STAU2	23.8486	0.691069	0.178426	1.81946e-05	0.00014296
LOXL2	20.2908	-0.633014	0.16487	1.82022e-05	0.00014296
GFOD2	8.14629	-0.787397	0.211743	1.83792e-05	0.000144124
PITX3	12.9339	-0.667423	0.175048	1.84642e-05	0.000144564
FAM118A	32.6468	0.546524	0.137601	1.86816e-05	0.000146037
GIPR	25.445	0.772443	0.203492	1.89201e-05	0.000147671
RPS3	74.7455	-0.697726	0.181379	1.91113e-05	0.000148931
CIAO1	20.0055	-0.58733	0.151847	1.91452e-05	0.000148964
CCL26	21.4928	0.789737	0.206344	1.94367e-05	0.000150996
ZNF571	23.8454	0.723576	0.18834	1.96065e-05	0.000152079
WDR1	18.6859	-0.7001	0.185243	2.00604e-05	0.000155359
NEK4	31.1508	-0.491594	0.124639	2.01264e-05	0.000155418
CYC1	29.0593	-0.557621	0.143647	2.01301e-05	0.000155418
OR7E24	25.4065	0.678929	0.176589	2.02256e-05	0.000155915
TTC3	38.4417	0.575403	0.146913	2.0268e-05	0.000156001
CSNK1E	24.239	-0.548214	0.14139	2.03901e-05	0.0001567
ABHD17A	26.4347	-0.521425	0.133223	2.0431e-05	0.000156774
ADARB1	23.4349	0.627787	0.161195	2.06829e-05	0.000158463
SERPINA7	45.5197	0.505495	0.1274	2.07332e-05	0.000158605
KHSRP	28.5893	-0.53187	0.136768	2.12815e-05	0.000162551
CDC14B	27.7504	0.692479	0.181839	2.13357e-05	0.000162717
DHRS2	24.4643	-0.609216	0.159356	2.15021e-05	0.000163737
CEP55	27.0332	-0.487965	0.124628	2.16597e-05	0.000164686
COX16	24.5193	-0.52264	0.134677	2.18436e-05	0.000165832
ALG12	54.7534	-0.48371	0.122872	2.20203e-05	0.000166921
BMPER	13.0745	-0.691533	0.184791	2.22802e-05	0.000168635
DNTT	60.1781	0.997431	0.278312	2.24174e-05	0.000169417
H1-3	15.5482	-0.803649	0.217688	2.25092e-05	0.000169855
GALNT2	31.4439	-0.514983	0.132875	2.2868e-05	0.000172302
MAGEA3	132.605	0.398587	0.0990985	2.30851e-05	0.000173677
SCAF1	22.8703	-0.566653	0.147238	2.31625e-05	0.000173997
RBM4	19.1808	-0.747066	0.199856	2.34197e-05	0.000175665
SOX4	42.7555	-0.462949	0.11793	2.36867e-05	0.000177402
BAG3	46.7163	0.508094	0.129356	2.38167e-05	0.000178109
PIK3R1	40.5014	0.471109	0.118778	2.39268e-05	0.000178665
SYNCRIP	45.5857	0.545961	0.139866	2.46327e-05	0.000183662
MYH7	207.829	0.951441	0.266764	2.52397e-05	0.000187908
CALM3	46.0059	-0.454286	0.115916	2.60233e-05	0.000193454
DNAJC8	17.934	-0.603278	0.160089	2.66004e-05	0.000197451
CAPRIN1	51.2262	0.469277	0.119642	2.70411e-05	0.000200425
TDGF1	41.1034	-0.458731	0.117935	2.73488e-05	0.000202149
CCDC8	105.09	0.439219	0.111577	2.73546e-05	0.000202149
EDAR	38.3453	-0.506396	0.131101	2.77704e-05	0.000204919
MAP3K2	22.9173	0.642395	0.168375	2.81702e-05	0.000207563
DIO2	21.8506	0.70953	0.189912	2.93783e-05	0.000216146
PLPP1	48.4887	0.829757	0.228883	2.94848e-05	0.000216611
HNRNPH1	42.1846	0.573115	0.150452	2.96612e-05	0.000217588
ZNF688	15.7549	-0.614933	0.164707	3.0228e-05	0.000221421
RRP1B	21.6205	0.642512	0.16912	3.05991e-05	0.000223812
ANKRD36	83.8854	-0.486793	0.126089	3.13228e-05	0.000228771
CCDC112	39.5706	-0.499108	0.130875	3.35425e-05	0.000244626
PGPEP1	30.753	-0.47552	0.123723	3.39031e-05	0.000246691
SLC25A19	35.0628	0.556612	0.14617	3.39243e-05	0.000246691
MXRA8	32.9729	-0.517908	0.136052	3.43206e-05	0.000249211
NR3C1	28.8018	0.615082	0.163538	3.4456e-05	0.000249831
CIC	25.684	-0.537443	0.143554	3.51079e-05	0.000254189
ANKRD13D	21.8177	-0.560301	0.149002	3.5203e-05	0.00025451
CAMLG	31.7086	0.598072	0.159551	3.5446e-05	0.000255897
MAK16	23.7092	0.628265	0.167126	3.55088e-05	0.00025598
FLYWCH2	35.4502	-0.49253	0.129303	3.56022e-05	0.000256285
HSPA4	38.9896	0.478982	0.124342	3.5977e-05	0.000258611
GAB2	32.5653	0.765802	0.212763	3.71328e-05	0.000266536
BUB3	27.4468	0.633225	0.170454	3.75765e-05	0.000269334
PRMT1	43.0366	0.507795	0.133727	3.80393e-05	0.000272261
WDR13	16.8105	-0.675724	0.186251	3.85698e-05	0.000275664
BRD2	31.2281	0.565499	0.150356	3.91521e-05	0.000279327
MAP3K7	40.1413	0.5143	0.136224	3.91939e-05	0.000279327
GPKOW	41.0391	0.623592	0.169858	3.99543e-05	0.000284341
PAIP2	28.1084	0.581202	0.155184	4.03853e-05	0.000287
LY6E	15.8759	-0.586134	0.159333	4.04934e-05	0.000287359
CXXC1	16.8062	-0.595965	0.162225	4.13211e-05	0.000292818
TNNT2	54.6306	-0.622092	0.168355	4.16231e-05	0.000294541
RHBG	12.9953	-0.651277	0.180718	4.20232e-05	0.000296952
GADD45GIP1	22.2425	-0.503865	0.134787	4.3268e-05	0.000305317
CEACAM16	24.4983	0.647371	0.176813	4.38217e-05	0.000308534
ZNF765	27.3772	0.554022	0.147453	4.38473e-05	0.000308534
ABR	25.8504	-0.488821	0.130526	4.45154e-05	0.000312796
RPL5	104.818	0.402633	0.10465	4.46636e-05	0.000313234
SLC15A4	29.9342	-0.452769	0.119719	4.4703e-05	0.000313234
ALKBH2	29.2057	0.686937	0.190007	4.48982e-05	0.000314162
USP9X	51.8358	0.482167	0.127204	4.49625e-05	0.000314172
MAGEA8	46.038	-0.420149	0.110062	4.5357e-05	0.000316487
BCAM	27.6335	-0.62896	0.172932	4.54678e-05	0.000316818
HSP90B1	40.3449	0.469892	0.123644	4.5685e-05	0.000317889
SERP1	31.317	0.60417	0.164253	4.63441e-05	0.000322027
ARF5	23.8911	-0.61094	0.167063	4.64203e-05	0.000322109
TPPP3	86.7015	-0.599952	0.162646	4.77886e-05	0.000331145
WRAP53	15.0047	-1.69588	0.189419	4.8111e-05	0.000332199
PCMTD1	26.3474	0.63616	0.173636	4.81194e-05	0.000332199
MGP	31.7102	-0.525609	0.142334	4.814e-05	0.000332199
SCRIB	19.7943	-0.586584	0.162073	4.83815e-05	0.000333406
AP4B1	21.5252	0.62511	0.169513	4.90588e-05	0.000337608
C5orf51	26.5583	-0.4961	0.133917	4.92603e-05	0.000338529
MRPS26	19.1202	-0.651754	0.181979	5.00535e-05	0.000343508
AWAT2	10.3199	-0.69051	0.195921	5.05299e-05	0.000346303
H3C15	16.204	-0.596451	0.165485	5.10235e-05	0.000349207
CWC15	19.7919	-0.554202	0.152694	5.15353e-05	0.000351988
ANK2	40.3307	0.496213	0.132654	5.15705e-05	0.000351988
UGDH	22.4576	-0.524289	0.142765	5.2866e-05	0.000360339
ATP6V0B	26.3265	-0.573587	0.158403	5.31822e-05	0.000362001
LY6G5B	27.4851	0.631748	0.174697	5.35059e-05	0.000363709
MGRN1	26.7114	-0.552659	0.151772	5.37601e-05	0.000364941
SEMA6A	31.2092	0.508977	0.136313	5.42181e-05	0.000367551
ERF	75.8834	-0.412231	0.109212	5.45889e-05	0.000369564
LRRN1	59.9517	0.562148	0.153828	5.57238e-05	0.000376738
TNRC6B	21.5416	-0.562775	0.155422	5.60951e-05	0.000378737
MAMDC2	25.8189	0.700126	0.196919	5.67533e-05	0.000382664
PLXNA2	15.7848	-0.657018	0.185183	5.69736e-05	0.000383632
LAMB2	57.8246	0.431948	0.114637	5.75515e-05	0.000387003
MBD6	17.6367	-0.666948	0.187092	5.77478e-05	0.000387802
SMPD3	16.2568	-0.621474	0.174998	5.79692e-05	0.000388766
DUX4	270.536	-0.472786	0.126901	5.81987e-05	0.000389783
PDE6D	47.7378	0.777925	0.22471	5.83457e-05	0.000390246
MYOZ1	56.6872	0.567462	0.155862	5.88138e-05	0.000392851
APP	70.9135	0.448186	0.119963	5.89808e-05	0.000393441
ELK1	118.845	-0.323418	0.0842486	6.0224e-05	0.000401199
KLF5	33.4333	0.5752	0.158625	6.17576e-05	0.000410869
NKX2-4	19.5136	-0.523206	0.145054	6.2549e-05	0.000415581
POU5F1	48.1103	-0.427611	0.1146	6.26911e-05	0.000415973
AKR1C2	18.5283	0.674747	0.188005	6.30051e-05	0.000417503
TLE1	13.8809	-0.593831	0.16752	6.37758e-05	0.000422051
PLD2	16.5822	-0.607343	0.172215	6.61992e-05	0.000437509
SEPTIN11	45.2922	0.509002	0.139553	6.66682e-05	0.000440028
MAPKBP1	74.1313	-0.524595	0.144725	6.69783e-05	0.000441492
SRP68	32.7964	0.502232	0.136271	6.70791e-05	0.000441575
CHMP6	31.0925	-0.464708	0.126483	6.73133e-05	0.000442534
USP22	42.7017	0.591773	0.16516	6.7482e-05	0.000443061
ZNF730	13.2942	-0.605581	0.172495	6.92303e-05	0.000453436
SNAPC2	17.19	-0.555294	0.156396	6.92434e-05	0.000453436
ARHGEF1	20.8252	-0.525353	0.147005	7.01213e-05	0.000458584
TMEM234	15.8988	-0.560574	0.158304	7.13795e-05	0.000466203
PIAS2	32.5543	-0.425889	0.115653	7.2904e-05	0.000475539
CSNK2A3	25.8136	0.547732	0.150794	7.30358e-05	0.000475779
CCNG1	22.1476	0.636041	0.178823	7.35552e-05	0.00047854
SSRP1	53.1246	0.4295	0.11554	7.37374e-05	0.000479102
ZKSCAN1	22.7604	0.649721	0.183128	7.46801e-05	0.000484597
CSNK1A1	40.5535	0.481056	0.131478	7.50669e-05	0.000486476
SGSM3	18.9908	-0.624864	0.177842	7.55268e-05	0.000488226
HIF3A	39.7358	-0.610277	0.172562	7.5532e-05	0.000488226
ACTR2	24.0994	-0.485439	0.133921	7.57687e-05	0.000489123
PSMD6	25.3186	0.594728	0.16576	7.58674e-05	0.00048913
ARHGAP27	31.79	0.494463	0.135211	7.62246e-05	0.0004908
APOL1	25.4835	0.78392	0.230532	7.64439e-05	0.000491579
AGAP9	27.2729	-0.496422	0.138278	7.81864e-05	0.000502071
RCC1L	32.2788	-0.556863	0.156412	7.82761e-05	0.000502071
TUBA1C	252.468	-0.581519	0.163172	7.87037e-05	0.000503737
SLC5A1	30.365	-0.454652	0.125441	7.87373e-05	0.000503737
RGMA	30.9856	-0.428128	0.117108	8.11921e-05	0.000518779
SETD5	35.8226	0.528706	0.147397	8.20014e-05	0.000523282
BEX2	32.9767	0.535542	0.150086	8.54441e-05	0.000544441
TSPAN14	16.8797	-0.545217	0.155434	8.55348e-05	0.000544441
PHF12	27.0804	0.602836	0.171734	8.92675e-05	0.000567478
DSG2	9.56441	-0.689864	0.205433	8.94519e-05	0.000567929
PKNOX1	17.2211	-0.547908	0.156233	8.95813e-05	0.000568029
LUM	22.7999	-0.511712	0.145352	9.11663e-05	0.000577348
WIPI1	40.9525	-0.386508	0.10559	9.40135e-05	0.000594626
SRCAP	30.6907	0.498445	0.138543	9.50003e-05	0.000600109
GLRX3	18.7044	0.628863	0.179701	9.83699e-05	0.000620611
SIPA1L3	25.3461	-0.525009	0.149773	9.89555e-05	0.000623104
FEM1A	30.2209	0.52373	0.147255	9.90141e-05	0.000623104
NDUFA3	24.2271	-0.73675	0.21795	9.95279e-05	0.00062555
TCF12	25.1208	-0.485801	0.137028	0.000100236	0.000629208
COL1A2	3127.72	-0.598661	0.171797	0.000100549	0.000629872
NFE2L1	102.064	0.5256	0.150355	0.000100593	0.000629872
HMBOX1	31.8654	0.521563	0.14723	0.000102155	0.000638854
EIF3F	38.8043	0.455594	0.126398	0.000102887	0.00064226
FAM13B	255.992	0.640399	0.189256	0.000102957	0.00064226
NPFFR1	11.0486	-0.642842	0.190945	0.000103748	0.000646268
EIF4G2	117.575	0.377533	0.103278	0.000103858	0.000646268
UBXN7	24.6034	0.567116	0.161039	0.000105202	0.000653819
TIMP1	22.0984	-0.49277	0.140768	0.00010663	0.000661641
PDHA1	44.4617	0.489071	0.137867	0.000106725	0.000661641
PCDH12	13.2941	-0.595878	0.175444	0.000106934	0.000662115
NIPA2	24.2328	-0.983045	0.29794	0.000107726	0.000666199
STIP1	116.159	0.421233	0.116995	0.000108464	0.000669933
SELENOF	27.85	0.539193	0.153348	0.000108803	0.000671195
RPS4X	99.804	0.393885	0.108502	0.000109007	0.000671629
MAP3K20	28.2333	0.878591	0.273085	0.000110204	0.000678171
SFPQ	46.8176	-0.484185	0.137694	0.000111641	0.000686168
MARCHF3	26.7723	-0.460942	0.130452	0.000111889	0.000686846
ADI1	33.8481	0.494367	0.13929	0.000113547	0.000696169
C7orf33	26.9312	-0.463561	0.131679	0.000113837	0.000697094
HNRNPH3	53.9898	0.385903	0.106079	0.000115016	0.00070281
KIR3DL1	40.8853	-0.411469	0.114718	0.000115051	0.00070281
CHMP3	41.2227	-0.388138	0.107214	0.00011586	0.000706887
HAND1	12.8816	-0.799965	0.247408	0.000116094	0.000707452
INTS12	17.582	0.678243	0.197907	0.000116275	0.000707693
RASSF1	32.5238	0.620909	0.182554	0.000119448	0.00072572
SPEG	26.8309	-0.60014	0.177296	0.000119527	0.00072572
CENPM	15.0977	-0.880285	0.274376	0.000120013	0.000727786
ATXN2L	34.2641	0.565943	0.165724	0.000121543	0.000736172
DTNBP1	27.8978	0.528978	0.150882	0.00012263	0.000741274
COL6A6	25.9975	0.592664	0.1729	0.000122681	0.000741274
SIGLEC16	62.5885	-0.365247	0.10084	0.000124327	0.000750311
DZIP1L	31.0334	-0.474915	0.135743	0.000124669	0.000751363
NARS1	33.8266	0.481429	0.13646	0.000124814	0.000751363
NAA50	34.8302	0.463036	0.130286	0.000124952	0.000751363
WASHC1	40.6072	-0.434786	0.123093	0.000128189	0.000769901
GLG1	39.1118	0.464338	0.131322	0.000128891	0.000773191
ZNF432	15.1727	-0.566603	0.168445	0.000130684	0.000782239
CSPG4	42.0115	-0.396492	0.110979	0.000130712	0.000782239
RIF1	18.2179	-0.532812	0.156184	0.000131636	0.000786828
APOA1	25.6665	0.658606	0.196486	0.00013208	0.000788541
DGCR2	30.2976	0.485696	0.138281	0.000133181	0.000794167
SFRP2	31.6051	-0.609732	0.180137	0.000134063	0.000798472
TRIP6	40.7013	0.490739	0.140577	0.000135679	0.000807042
SNRPA	19.7883	-0.540248	0.159695	0.000135824	0.000807042
CCDC137	15.725	-0.541562	0.159707	0.000137502	0.000816043
ZNF622	17.0512	-0.519054	0.152368	0.000138542	0.000821241
ELOB	25.34	-0.518406	0.151782	0.000138812	0.000821865
SPON2	32.1223	-0.513568	0.150053	0.00014266	0.000841896
ATRN	23.2662	0.583034	0.170737	0.000142688	0.000841896
BACH1	39.9566	0.483499	0.138657	0.0001427	0.000841896
CAVIN4	51.9045	0.435236	0.123607	0.000144767	0.000853083
PFDN2	22.8846	-0.504131	0.147899	0.000145177	0.000854496
CMBL	12.2729	-0.587336	0.177548	0.000149744	0.000880337
PCOLCE	38.0215	-0.432236	0.123973	0.000150602	0.000884346
RAB1B	35.593	-0.493204	0.143595	0.000151305	0.00088743
ROCK2	22.4907	-0.474043	0.138422	0.000155245	0.000909475
GAK	29.6813	0.561858	0.166029	0.000157003	0.000918696
MUSTN1	105.973	0.858971	0.279216	0.000159625	0.000932949
TIPIN	27.5957	-0.454727	0.131988	0.000162486	0.000948561
ATF7IP	36.7203	-0.456538	0.132908	0.000167292	0.00097548
TEX2	25.2275	0.622736	0.186933	0.000167728	0.000976886
PAMR1	32.3379	0.680719	0.211086	0.000167958	0.000977087
FBRS	46.9583	-0.37699	0.107215	0.000169281	0.000983638
RBM3	21.5977	-0.484674	0.142468	0.000169999	0.000986663
HAT1	25.6613	0.544152	0.160725	0.000170449	0.000988128
SLC22A17	23.2804	-0.443603	0.129332	0.000171114	0.000989626
RPS10	33.0318	-0.594692	0.179485	0.00017116	0.000989626
RPL7L1	32.9945	0.46311	0.133739	0.000171301	0.000989626
GRID2IP	14.1301	-0.632393	0.197483	0.000174941	0.00100949
KLHDC8B	34.6211	-0.401672	0.115606	0.000175501	0.00101156
RPL7A	131.466	-0.503334	0.147679	0.000176182	0.00101432
FHL1	199.97	-0.694434	0.213396	0.000178981	0.00102924
ARHGAP9	24.8818	-0.488143	0.144356	0.000179353	0.0010302
WIF1	31.8789	0.699938	0.220579	0.000181247	0.00103988
RPL36A	59.7806	0.490629	0.144379	0.000181466	0.00103995
AMOTL1	42.9594	0.462547	0.135102	0.000182466	0.00104448
ATP13A1	19.8639	-0.589021	0.177622	0.000183696	0.00105032
ZNF577	32.1023	-0.465312	0.136672	0.000185565	0.0010598
KRTAP9-4	41.3486	-0.378861	0.108585	0.000186713	0.00106514
VAX1	13.1069	-0.706791	0.225575	0.000187074	0.00106598
STBD1	247.061	-0.226422	0.0621688	0.000188483	0.00107279
NPAS2	27.8972	-0.0278898	0.122857	0.000189375	0.00107664
MARK4	39.7326	0.440379	0.127686	0.00019052	0.00108192
MFGE8	22.9706	-0.517119	0.155857	0.000194795	0.00110494
ZFYVE19	19.4938	-0.907895	0.291413	0.000197267	0.00111769
SIGMAR1	83.3592	0.347161	0.0984852	0.000197705	0.00111891
FGFR1OP2	31.9395	-0.412891	0.120138	0.000199843	0.00112899
SYP	35.9397	-0.679159	0.210905	0.000199937	0.00112899
AKIRIN2	33.0235	0.526045	0.157095	0.00020106	0.00113405
SZRD1	20.0174	-0.562371	0.171282	0.000202043	0.00113746
SMARCB1	22.7433	-0.989662	0.116491	0.000202342	0.00113746
CD22	20.5915	0.600216	0.181582	0.000202346	0.00113746
BLOC1S1	19.4621	-0.506041	0.153005	0.000202745	0.00113842
CASQ1	17.5107	-0.658611	0.206068	0.000203083	0.00113904
UPK3B	10.3334	-0.685332	0.218197	0.000204771	0.00114722
MEX3C	25.0828	0.515908	0.152903	0.000205202	0.00114835
TMA16	25.3756	0.575183	0.174538	0.000210805	0.00117839
CHST12	15.816	-0.712903	0.225773	0.000211327	0.00117999
PRRC2C	25.3152	0.517947	0.15419	0.000212247	0.00118381
NRDC	48.7102	0.427922	0.124997	0.000213376	0.00118878
RPS25	30.6141	-0.702008	0.222015	0.000214229	0.00119118
EHD1	48.4251	-0.673146	0.2088	0.000214284	0.00119118
STRAP	27.6928	0.514755	0.152945	0.000214792	0.00119268
BTG1	35.8437	0.515137	0.155064	0.000216654	0.00120169
TJP3	24.0722	0.620353	0.19201	0.000217723	0.00120628
CTNNA1	57.246	0.438315	0.128229	0.000218724	0.0012098
ANGPTL6	30.1326	-0.461471	0.13806	0.000218843	0.0012098
PLK3	17.7926	-0.503318	0.153009	0.000219346	0.00121124
EMILIN2	28.0652	0.584708	0.17987	0.000220638	0.00121703
ZFHX4	29.9778	0.514062	0.154301	0.000222226	0.00122445
NCK1	217.638	0.570387	0.176986	0.000222682	0.00122561
SETX	24.0252	0.526497	0.158077	0.000224495	0.00123256
MED13	63.8336	0.541903	0.165907	0.000224646	0.00123256
IGFBP6	10.311	-0.608238	0.1916	0.000224685	0.00123256
TMED4	26.3727	-0.576882	0.179936	0.000226828	0.00124296
EIF4G3	32.306	0.505478	0.151551	0.000227892	0.00124742
ZNF548	42.198	-0.363968	0.106313	0.000228575	0.00124979
ZNF394	22.4502	-0.469028	0.141101	0.000232419	0.00126809
SDHD	20.4467	0.585623	0.178505	0.000232429	0.00126809
PLEKHG4	28.7867	-0.416436	0.123251	0.000235711	0.0012846
S100A4	46.9133	-0.518784	0.157548	0.00023733	0.00129202
ORAI1	27.8992	-0.486796	0.148434	0.000238307	0.00129593
STAG2	36.5414	0.508755	0.154039	0.000239749	0.00130235
DYNLRB1	23.6051	-0.581334	0.180632	0.000240913	0.00130725
COIL	17.8164	-0.644621	0.206402	0.00024601	0.00133346
CHCHD5	26.1383	-0.467098	0.141894	0.000248438	0.00134517
STT3B	30.4145	0.634532	0.19953	0.000251689	0.0013613
STXBP4	31.8696	0.509251	0.155208	0.000258466	0.00139644
FBXO44	14.7949	-0.530408	0.165705	0.000259638	0.00140126
CEP68	25.4996	0.50192	0.151376	0.000260308	0.00140336
RAD51B	20.507	-0.614565	0.197307	0.000266032	0.00143268
THRAP3	47.2402	0.393498	0.116502	0.000268548	0.00144467
NPLOC4	42.6035	-0.410827	0.122844	0.000277631	0.00149173
MNT	19.871	-0.526431	0.162574	0.000277892	0.00149173
ZNF383	170.378	0.400452	0.118931	0.000278363	0.00149266
COL11A1	31.4608	-0.739095	0.241432	0.000279018	0.00149457
PRKCZ	35.0148	0.493342	0.15092	0.000280863	0.00150284
PIGM	17.7792	-0.498415	0.153637	0.000282271	0.00150876
PTPN12	18.5737	0.586803	0.182872	0.000283877	0.00151573
SLC16A3	16.1163	-0.584451	0.185403	0.000284931	0.00151973
ALDH1B1	21.5383	-0.461551	0.141727	0.00028692	0.00152871
TNFRSF10C	51.8698	-0.353346	0.103901	0.000289499	0.00154081
ATAD3A	81.9151	-0.269727	0.0773021	0.000289852	0.00154105
C4orf3	37.9175	0.417394	0.123955	0.000290221	0.00154138
SLC25A11	31.9004	-0.383674	0.11439	0.000291893	0.00154824
MYRF	12.9953	-0.596795	0.19287	0.000292133	0.00154824
DNAJB6	34.4383	0.603477	0.191189	0.000294245	0.00155694
ZNF260	26.9567	0.495153	0.150815	0.000294396	0.00155694
SCAF8	23.2548	0.517351	0.158067	0.000296288	0.00156373
CR2	33.8742	0.585628	0.185598	0.000296306	0.00156373
ZNF66	34.9705	0.439889	0.131906	0.000299226	0.00157748
MTPAP	36.023	0.459141	0.13967	0.000303504	0.00159835
RBP1	31.6979	-0.431712	0.131438	0.000304864	0.00160382
GATA2	53.5344	0.401214	0.119836	0.00031375	0.00164883
USP7	22.4589	-1.0074	0.35257	0.000316231	0.00166013
NECAB3	25.9447	-0.434921	0.132851	0.000317073	0.0016628
SAR1A	31.5512	0.488558	0.14943	0.000317886	0.00166532
NDST1	31.5474	0.475985	0.146208	0.000320575	0.00167539
PSAT1	23.3209	-0.436819	0.133772	0.000320668	0.00167539
ADK	29.4883	0.532664	0.166776	0.000320812	0.00167539
LUZP6	21.5515	0.594814	0.188566	0.000322696	0.00168347
TLE2	29.5404	0.573476	0.182548	0.000325796	0.00169787
RPL32	138.712	0.47262	0.146219	0.000328803	0.00171176
EIF1AX	31.8289	0.45341	0.137755	0.000331049	0.00172166
COPB1	25.8533	0.484283	0.148075	0.000332033	0.00172499
CUL7	20.9473	-0.536508	0.170455	0.000333814	0.00173244
MEF2C	67.5941	0.377353	0.112476	0.000334538	0.00173352
ARHGAP45	14.0036	-0.534895	0.170714	0.000334716	0.00173352
PRKRIP1	31.7572	-0.406229	0.123339	0.000337149	0.00174432
CLK2	24.1571	0.519324	0.161654	0.000340553	0.0017598
KLHDC3	32.8704	0.470614	0.143799	0.000341253	0.0017598
NUDCD1	11.7951	-0.57154	0.185296	0.000341369	0.0017598
RGS18	96.9368	-0.393083	0.118261	0.000341548	0.0017598
FIZ1	74.3047	-0.305398	0.089479	0.000344831	0.00177489
CENPT	30.0415	-0.417783	0.127936	0.000345593	0.00177698
SPC24	27.8408	-0.42552	0.130912	0.000351382	0.00180489
FGF13	42.4546	0.798815	0.276417	0.000352924	0.00181095
LGMN	31.0263	0.46324	0.142819	0.00035809	0.00183558
TAOK2	12.3499	-0.600825	0.198445	0.000362078	0.00185412
WDR91	15.7592	-0.539904	0.174133	0.000368366	0.00188439
ADPRH	24.6707	-0.43122	0.133415	0.000369137	0.00188641
CD9	37.545	0.468643	0.145702	0.000370596	0.00189193
TSC1	19.0936	-0.494112	0.157053	0.000373053	0.00190253
MGAT5	23.3061	0.537324	0.169423	0.00037405	0.00190402
NGRN	22.0397	-0.572124	0.185977	0.000374106	0.00190402
TGFB1I1	17.602	-0.485798	0.154244	0.000377436	0.00191902
VCP	45.7571	0.417624	0.127869	0.000379536	0.00192773
MDFI	24.7173	-0.457656	0.143355	0.000381931	0.00193762
SLC36A4	38.7829	-0.393821	0.120021	0.000382258	0.00193762
DHX34	20.5984	-0.457191	0.143904	0.000385436	0.00195176
CCDC14	28.2513	0.569301	0.184373	0.000394235	0.00199429
GOLM2	27.489	0.532935	0.170368	0.000396711	0.00200479
ANKRD16	19.6737	0.56029	0.179096	0.000408199	0.00206076
RBMX2	25.2924	0.503854	0.158902	0.000412689	0.00208133
LDHAL6A	53.9938	-0.305516	0.0911972	0.0004153	0.00209111
MUC5B	17.6624	0.627617	0.204334	0.000415463	0.00209111
DACH1	21.2218	-0.632939	0.206885	0.000416798	0.00209572
TP53	25.5452	0.50625	0.159402	0.000420079	0.00211009
ADD1	38.0057	0.425691	0.13127	0.000423515	0.00212325
TMSB4X	47.8081	-0.364477	0.111268	0.000423547	0.00212325
TMCC1	29.1786	-0.0340165	0.119502	0.00042678	0.00213732
TSR1	21.4085	0.531647	0.1691	0.000429767	0.00215012
MRTFA	22.4601	-0.527373	0.171778	0.000432061	0.00215944
MARK3	32.915	0.460019	0.144671	0.000438601	0.00218994
FDPS	17.9132	-0.058395	0.148566	0.000440666	0.00219806
PPP1R12B	71.5343	0.362883	0.110448	0.000445388	0.0022194
CYP2D6	14.7591	-0.583138	0.19582	0.000445973	0.0022201
FOXN3	27.6898	-0.50619	0.163009	0.000448062	0.00222828
LNPEP	31.6774	0.472	0.148943	0.000448723	0.00222936
ZNF729	14.7785	-0.517666	0.16996	0.000458333	0.00227484
RPN2	36.3916	0.428493	0.13321	0.00045912	0.00227649
NDUFA4	41.8876	-0.484358	0.154452	0.000460705	0.00228208
BARHL2	29.4677	-0.426262	0.134436	0.000463233	0.00229234
PXN	63.2007	0.343903	0.104142	0.000469674	0.00232192
CDK8	24.9962	0.520453	0.167793	0.000471672	0.00232764
TNNT3	325.969	0.448672	0.142567	0.000471776	0.00232764
CCDC189	50.9838	-0.39755	0.122874	0.000472227	0.00232764
SERF2	37.4684	-0.552406	0.182061	0.000475836	0.00234312
NSMF	15.6671	-0.592326	0.19857	0.000479581	0.00235924
VEGFB	26.7049	-0.391514	0.1227	0.000482882	0.00237314
RGS9	30.4375	0.582457	0.192422	0.000484149	0.00237703
EIF2S2	28.3218	0.48941	0.155988	0.00049356	0.00242086
GNL1	16.2159	-0.52666	0.174371	0.000497322	0.00243693
CAPN6	75.1622	0.405331	0.12684	0.000502312	0.00245691
MAP3K3	22.5803	0.533502	0.174085	0.000502403	0.00245691
RPS7	26.5734	-0.535406	0.176178	0.000502873	0.00245691
UBQLN1	20.8696	0.525966	0.169454	0.000504242	0.00246119
TM2D1	23.8935	0.4944	0.15865	0.0005063	0.00246883
MMP2	33.6577	0.498226	0.162285	0.000510152	0.00248519
FBXO11	24.2826	0.485896	0.155026	0.000512756	0.00249544
PPT2	21.1987	-0.450804	0.145056	0.000518267	0.00251981
SSNA1	19.9149	-0.4427	0.14249	0.000519433	0.00252214
DNAJC14	23.0621	-0.432664	0.138393	0.000519753	0.00252214
DDX4	90.9188	0.564556	0.188783	0.000520671	0.00252329
FIBP	12.1038	-0.585713	0.199109	0.000521	0.00252329
NCL	64.9266	0.331525	0.100876	0.000527879	0.00255414
ITM2A	47.1645	0.495646	0.161539	0.000528963	0.00255691
H4C13	28.7686	-0.419771	0.133292	0.00053246	0.00257133
UBE2T	26.3244	-0.757452	0.264319	0.000534714	0.00257972
CYB5R1	64.5869	0.387515	0.120947	0.000537383	0.00258985
ADAR	23.2549	-0.427773	0.137175	0.000537924	0.00258985
TMEM156	19.392	-0.497638	0.163737	0.000538366	0.00258985
MACO1	39.344	0.489292	0.159761	0.000539372	0.0025922
MYOD1	32.3455	-0.435139	0.138576	0.00054075	0.00259633
CBX6	31.4689	-0.387462	0.122087	0.000541713	0.00259846
FRMD7	33.084	-0.420949	0.134915	0.000542643	0.00260042
F12	21.7163	-0.440424	0.14181	0.000544818	0.00260835
ATP5PB	29.7247	0.481653	0.154174	0.000548977	0.00262575
SDK2	43.6852	-0.348359	0.108023	0.000552136	0.00263834
NFIX	68.2391	0.455141	0.147743	0.000556415	0.00265624
NPDC1	19.8602	-0.458763	0.149548	0.000558065	0.00266158
DDX58	44.4611	0.775101	0.282483	0.000558918	0.00266311
DCAF1	37.3183	0.422817	0.133923	0.000560604	0.0026686
MCL1	42.0721	0.381224	0.119205	0.000561896	0.00267221
DDAH2	14.6643	-0.618518	0.214737	0.000563382	0.00267423
PDS5B	35.6428	0.51885	0.170234	0.000563389	0.00267423
NDUFC1	22.6229	-0.467598	0.15413	0.000574302	0.00272221
SEC63	31.588	0.432275	0.13741	0.000575085	0.00272221
SLC1A7	11.9418	-0.534448	0.180933	0.000575129	0.00272221
ITGAX	23.1325	-0.429506	0.138853	0.000578252	0.0027344
ATP5IF1	45.1993	0.387456	0.121982	0.000582547	0.00275211
DAD1	31.0696	-0.452621	0.14856	0.000590515	0.00278712
SNRPN	30.496	-0.500107	0.165254	0.000592531	0.002794
ASXL2	42.4771	0.629899	0.219614	0.000599321	0.00282242
H4C4	12.8415	-0.530701	0.179006	0.000599687	0.00282242
SFRP4	72.1867	0.345731	0.107369	0.00060187	0.00282986
ABHD14B	20.1428	0.546141	0.181312	0.000602398	0.00282986
H2BC6	11.883	-0.557545	0.191104	0.000619908	0.00290938
FAM83E	39.2009	-0.555123	0.188798	0.000622159	0.00291721
TGFB2	31.4818	0.485062	0.159663	0.000622982	0.00291833
TMOD3	13.2981	-0.530246	0.17892	0.000631787	0.00295681
SEC23B	22.7506	0.505299	0.166777	0.000637886	0.00298256
TRAPPC1	17.7161	-0.487351	0.163188	0.000640267	0.0029909
HLA-DQB1	36.9203	0.780416	0.29121	0.000646782	0.00301852
RUFY1	27.3267	0.522106	0.175317	0.000653624	0.00304761
CD55	24.4484	0.608518	0.209585	0.000656691	0.00305905
CERKL	18.6608	-0.467063	0.15538	0.000660078	0.00306832
GNB2	31.6439	-0.380844	0.122112	0.000660494	0.00306832
ARHGEF2	32.7277	-0.567368	0.195768	0.00066052	0.00306832
THUMPD1	26.5764	0.452826	0.147371	0.000673398	0.00312524
DSN1	18.0056	0.539429	0.180032	0.000676202	0.00313535
PSMB5	40.5223	0.389371	0.124079	0.000680875	0.00315409
PITPNB	29.9088	0.503744	0.167359	0.000684694	0.00316885
IGHG1	20.5018	-0.782193	0.28022	0.000686314	0.00317341
LELP1	29.74	0.429066	0.138585	0.000691017	0.00319221
TNK2	34.0454	-0.412577	0.134698	0.000693186	0.003195
IGKC	24.4774	0.514966	0.172049	0.000693386	0.003195
PCGF5	20.5174	0.525438	0.174957	0.000694058	0.003195
YEATS2	25.673	0.475086	0.156076	0.000694177	0.003195
PPM1A	27.8134	-0.43081	0.142116	0.0006959	0.00319838
RAB11B	35.3816	0.395821	0.126517	0.000696189	0.00319838
OBSCN	27.6982	-0.575655	0.198946	0.000699468	0.00321049
SS18	37.4622	-0.348431	0.11105	0.000705845	0.00323679
RAB2A	37.6748	0.386171	0.123464	0.000707045	0.00323933
IPO4	29.9595	0.469338	0.154835	0.000710655	0.00325289
RAB11FIP5	21.8111	-0.417793	0.137267	0.000712844	0.00325714
STMN3	29.2492	-0.387539	0.125576	0.000712885	0.00325714
APPBP2	28.779	0.454033	0.14889	0.000721041	0.00329139
GSE1	27.9489	0.463029	0.152547	0.000725828	0.00330859
TSNAX	53.0655	-0.329478	0.103869	0.000726131	0.00330859
EIF1	44.4659	-0.421023	0.137513	0.000733409	0.00333782
BARD1	44.4452	0.718126	0.266206	0.00073388	0.00333782
MAP9	24.128	0.600635	0.211829	0.000736806	0.00334808
FXYD1	22.4235	-0.596316	0.209924	0.000744989	0.0033822
PMP2	30.9112	-0.516255	0.176964	0.00075097	0.00340626
KDM4B	48.1672	-0.627859	0.223067	0.000757851	0.00343435
COPS6	34.9503	0.407972	0.132166	0.000763109	0.00345505
ARVCF	26.4775	-0.395228	0.129262	0.00076468	0.00345904
CSRP3	44.7505	-0.360355	0.115135	0.000765441	0.00345935
TMEM200A	30.5625	0.438184	0.144347	0.000778227	0.00351135
HCK	50.6538	0.541592	0.186844	0.00077835	0.00351135
PGK1	50.2081	-0.35221	0.11265	0.000784467	0.00353575
FBXO15	246.164	0.499852	0.171315	0.000786314	0.00354089
MUC5AC	23.1447	-0.473615	0.161221	0.00078811	0.00354579
KDM5C	39.0886	0.430162	0.141507	0.000790576	0.00355369
RPL34	120.387	0.336301	0.107021	0.000795655	0.00357331
CNGA4	18.9442	0.524274	0.17747	0.000800369	0.00359125
PRPF6	21.5489	-0.567336	0.200676	0.000807472	0.00361988
ABCD1	24.4549	0.481137	0.160909	0.000810004	0.00362798
GPM6A	24.0812	-0.440409	0.147051	0.00081566	0.00365004
PRR29	22.4317	-0.416255	0.138634	0.000820487	0.00366607
IPO5	35.2164	0.390577	0.126509	0.000820707	0.00366607
PILRA	21.4645	0.610876	0.216048	0.000828584	0.00369796
PWWP3A	27.7848	-0.38669	0.127034	0.000829671	0.0036995
PHACTR4	21.388	0.54339	0.186075	0.000831314	0.00370262
SLC4A4	27.671	-0.420836	0.14038	0.000831851	0.00370262
NCOR2	43.3272	0.357335	0.114216	0.000834082	0.00370698
DNASE1L1	24.7328	-0.402686	0.133305	0.000834312	0.00370698
PLEKHG3	17.6288	-0.472491	0.161812	0.000836801	0.00371474
NUP153	20.9417	0.509316	0.173009	0.000838455	0.00371879
FKBP1B	14.4072	-0.526784	0.184529	0.000859486	0.00380739
CECR2	45.1457	0.448578	0.150519	0.000859954	0.00380739
SARNP	20.2712	-0.44047	0.148777	0.000865721	0.00382953
DFFB	25.5409	-0.558663	0.197215	0.000869779	0.00384397
EPS15L1	28.8504	0.453328	0.151886	0.000870521	0.00384397
SYNGR3	18.1246	-0.589145	0.21344	0.000874659	0.00385883
ISOC2	16.8061	-0.738168	0.272944	0.000879712	0.00387771
LRTM1	32.413	-0.398318	0.132604	0.000889205	0.00391435
ABCF2	29.5511	0.418149	0.137987	0.000889589	0.00391435
ARRDC1	93.9622	0.348517	0.112828	0.000907357	0.00398694
EGR1	85.4509	0.431018	0.14529	0.000907681	0.00398694
PA2G4	30.6905	-0.380141	0.125318	0.00091009	0.00399386
STEEP1	14.5719	-0.494532	0.172401	0.000910853	0.00399386
DLL3	18.3235	-0.436512	0.148125	0.000921348	0.00403635
H2AC11	12.7695	-0.522777	0.185569	0.000928323	0.00406334
PCF11	25.181	-0.395233	0.131967	0.00093341	0.00408204
ARHGDIA	37.6268	-0.439977	0.14913	0.000951883	0.00415919
CHD2	28.3036	0.449491	0.151908	0.000961361	0.00419693
HIPK3	46.5235	0.366908	0.119795	0.000967685	0.00422086
CIDEA	25.5874	0.441478	0.148187	0.000973588	0.00424291
SENP6	30.5097	0.414627	0.13692	0.000978635	0.00426119
FOXD2	25.0702	-0.519177	0.185124	0.000990489	0.00430906
KREMEN2	31.6505	0.468348	0.159258	0.00099154	0.00430988
ZNF568	37.8793	-0.404254	0.136406	0.000992571	0.00431062
SLC37A3	36.3747	0.516384	0.181488	0.000996123	0.00432229
BSDC1	24.6682	0.495015	0.170745	0.000999021	0.00433111
EIF3C	96.3005	-0.328562	0.10654	0.00100263	0.00434299
COL5A3	27.3138	-0.48193	0.168831	0.0010036	0.00434344
LAMA2	41.1091	0.510556	0.18081	0.00101017	0.00436809
SLC39A3	35.8442	-0.355322	0.11735	0.00101472	0.00438396
OLFM2	15.9829	-0.474317	0.166316	0.00101588	0.00438519
MSC	14.3317	-0.490115	0.173269	0.00101733	0.00438769
IGF2	1099	-0.492629	0.170209	0.00101974	0.0043943
SH3GLB2	16.6104	-0.516685	0.18437	0.001025	0.00441316
POSTN	119.624	0.598552	0.223724	0.00103531	0.00445372
CORO1C	29.6492	0.404615	0.135114	0.00104251	0.00448084
RASA4	20.7117	0.476797	0.163249	0.00106456	0.00457165
SRSF11	27.0411	-0.389491	0.131668	0.00109088	0.00468068
PLXND1	22.7264	-0.588295	0.214008	0.00109462	0.00469271
SRSF10	22.8043	0.450387	0.153521	0.00110354	0.00472688
VASH1	21.5205	-0.451827	0.157188	0.00111164	0.00475751
PRC1	15.6922	0.563108	0.20077	0.00111551	0.00476999
CDON	21.1919	-0.439272	0.153235	0.00112613	0.00481129
IGHG4	76.1898	0.306595	0.0999155	0.00114411	0.00488395
COL3A1	682.843	-0.493	0.172966	0.0011531	0.00491463
ITGB1	59.8596	0.360842	0.120196	0.00115393	0.00491463
ZNF638	33.8044	0.387428	0.1299	0.00115425	0.00491463
TXLNA	25.7939	0.444038	0.152053	0.00115812	0.00492693
HSP90AA1	48.3151	0.54349	0.198761	0.00116608	0.00495658
TFDP2	25.2503	0.438773	0.14999	0.00117903	0.00500737
NPEPPS	39.4867	0.35258	0.116754	0.00118744	0.00503455
ZBTB47	23.2791	-0.409132	0.140545	0.00118744	0.00503455
PEBP4	24.2838	0.466817	0.162302	0.00119699	0.00507074
MLEC	21.3564	-0.437887	0.153893	0.00121144	0.00512759
H2AC6	24.2756	-0.401907	0.138913	0.00122481	0.00517981
C5orf15	26.2588	0.49053	0.173909	0.00122787	0.00518837
TDP1	13.6685	-0.46891	0.167612	0.00123882	0.00523023
DUSP13	21.6476	-0.430579	0.15096	0.00124001	0.00523083
BTBD6	55.5067	-0.375154	0.12705	0.00125867	0.0053051
ARF4	25.0237	0.430905	0.147842	0.00126199	0.00531458
FKBP9	44.0256	0.361493	0.121625	0.00126583	0.00532627
ANKRD13A	23.5886	-0.215668	0.133559	0.0012685	0.00533302
KRBA1	14.4806	-0.529879	0.194011	0.00127117	0.00533617
EPB41L3	35.7143	0.395566	0.134464	0.00127138	0.00533617
ZNF521	31.7307	0.408798	0.140375	0.00127841	0.00535547
RNPEP	55.9995	-0.470503	0.16592	0.00127854	0.00535547
RAP1B	27.9038	0.425861	0.147001	0.00127919	0.00535547
PAM	25.6531	0.514266	0.184623	0.00128104	0.00535874
SMAD2	31.5549	0.486222	0.172948	0.00130016	0.0054299
FIGN	21.0028	-0.545643	0.19834	0.00130022	0.0054299
GOT1	30.6677	0.418244	0.14437	0.00131421	0.00548373
FIP1L1	28.7332	0.415702	0.142805	0.00131977	0.00549818
VEZT	24.0512	0.440436	0.152639	0.00131987	0.00549818
RHOBTB2	26.0758	0.472881	0.167281	0.00132525	0.00551601
OTUB1	28.3976	0.44079	0.153969	0.00133465	0.0055505
GGA3	60.3607	-0.277638	0.0913853	0.00134131	0.00557357
RB1CC1	28.099	0.490272	0.175085	0.00135159	0.00561162
CCDC62	10.0326	-0.583229	0.223133	0.00136062	0.00564441
ZSCAN32	33.2655	0.495088	0.17762	0.00137074	0.00568169
CAND2	22.7514	-0.468639	0.168168	0.00137759	0.00570538
MEGF10	36.045	0.401466	0.138437	0.00138406	0.00572729
ANKRD50	27.8859	0.452621	0.159245	0.00138527	0.00572729
PRSS54	39.7741	0.566693	0.214311	0.00138632	0.00572729
ATP1A1	52.1263	0.49243	0.180049	0.00138807	0.00572979
ITIH4	35.5204	0.660305	0.260852	0.0013952	0.00575449
C1QB	25.8667	-0.382378	0.133176	0.00140386	0.00578545
TCEAL8	38.6295	0.395605	0.136554	0.00140636	0.00578994
CSRP1	17.0417	-0.481066	0.174921	0.00140727	0.00578994
SLC38A2	52.8685	0.426721	0.14943	0.00142235	0.00584718
DCAF11	17.3165	-0.534086	0.201575	0.00143231	0.00588327
PLEKHD1	48.1871	-0.329201	0.111234	0.00143614	0.00589418
APBB3	19.5233	0.526601	0.19362	0.00145384	0.00596194
GTF2IRD1	31.6707	0.412394	0.143638	0.00147317	0.00603626
ATP5PF	50.8007	0.358288	0.122149	0.00147674	0.00603869
PDK4	25.0544	0.445508	0.156944	0.00147724	0.00603869
TNNI1	51.7339	-0.382998	0.132324	0.00147739	0.00603869
AKT1	25.6235	-0.461503	0.167009	0.00147895	0.00604017
GRAMD2A	17.066	0.532051	0.193436	0.00148273	0.00605063
ABI3	14.4785	-0.478079	0.175493	0.00149354	0.00608982
SNAP29	40.8272	0.433028	0.153294	0.00150349	0.00612536
RPS29	37.599	-0.479584	0.173542	0.00151276	0.00615814
EMC1	30.8342	0.388169	0.133853	0.00151459	0.00616055
PPP1R14C	26.3182	0.497808	0.183132	0.00151676	0.00616438
DNAJB12	17.8721	0.51067	0.185727	0.00154976	0.00629339
TET2	26.2595	0.471407	0.170448	0.00155446	0.00630518
NAA30	25.2076	0.447623	0.159079	0.00155518	0.00630518
RPAIN	26.71	-0.35929	0.124698	0.00155876	0.00631455
TFG	53.4538	0.434493	0.155526	0.00156502	0.00633479
ANXA7	20.9243	-0.405254	0.143892	0.00157236	0.00635936
RPL29	90.4607	-0.481279	0.17436	0.00157751	0.00637504
NCAPD3	21.412	0.455486	0.162183	0.00159109	0.0064247
ACAA1	45.9327	-0.327301	0.111172	0.00159669	0.00644213
CAVIN3	20.581	-0.49254	0.185452	0.00161105	0.00649483
SEPTIN7	62.864	0.320038	0.108574	0.00162095	0.00652947
RGS2	70.132	0.400241	0.142292	0.00164035	0.00660229
NSUN2	21.0633	0.476016	0.171812	0.00164779	0.00662691
PPFIA4	33.0745	-0.3418	0.118079	0.00165253	0.00664066
LRP1	37.8461	-0.374895	0.131468	0.00165538	0.00664675
CUX1	45.8381	0.393093	0.139238	0.00166246	0.00666614
RITA1	17.5656	-0.480845	0.179566	0.00166287	0.00666614
RPL9	99.4022	-0.384488	0.134615	0.00166441	0.00666698
N4BP2L2	27.8172	0.41368	0.14598	0.00166903	0.00668013
NRAP	92.0568	0.491888	0.183738	0.00167559	0.00670102
SMAD1	28.917	0.397786	0.139709	0.00168684	0.00674064
DNMT1	23.2335	0.434334	0.154635	0.00170824	0.00682068
HRC	75.1793	0.39393	0.139405	0.00172383	0.00687744
MMADHC	26.3069	0.438777	0.157134	0.00172952	0.00689388
SOX3	14.3848	-0.445377	0.164108	0.0017307	0.00689388
IGFBP2	31.2596	-0.475721	0.176306	0.00175575	0.00698809
CYP46A1	18.4604	-0.543378	0.210646	0.00176248	0.00700929
NDUFS6	32.1841	0.370386	0.128776	0.00177051	0.00703562
ENO3	183.043	-0.445842	0.161919	0.00179989	0.0071463
HINT1	34.3313	-0.376646	0.134008	0.00180122	0.0071463
MTFR1L	26.8036	0.404852	0.143454	0.00182378	0.00723009
SYMPK	27.4386	0.398852	0.141213	0.00183717	0.00727739
TRAK1	71.9644	0.337757	0.117141	0.00183949	0.00728084
LMAN1	40.0187	0.453633	0.166919	0.00185172	0.00732224
MYLK4	49.403	0.343811	0.119543	0.00185431	0.00732224
LRRC75B	21.7685	-0.405145	0.146314	0.00185434	0.00732224
BTBD9	13.6458	0.564992	0.213765	0.0018618	0.00734589
CTDP1	21.3467	-0.442987	0.16276	0.0018702	0.00737321
GORASP2	36.7271	0.395205	0.141242	0.00188028	0.00740711
HRK	17.4591	-0.466243	0.173997	0.00188212	0.00740853
SUGP2	41.5652	0.51429	0.195676	0.00190656	0.00749883
VCAN	23.2942	0.54013	0.208943	0.00191562	0.00752267
SMAD7	83.3838	0.475921	0.17988	0.00191563	0.00752267
ETV3	275.443	0.236171	0.0790332	0.00192775	0.00756435
CXCL14	18.5566	-0.507407	0.193313	0.00196233	0.00769398
DSC3	16.7009	-0.47867	0.181756	0.0019644	0.00769609
PGAM2	21.4024	-0.429809	0.158903	0.00198672	0.00777743
ANGPTL1	23.9358	0.454246	0.166642	0.00199407	0.0078001
CIRBP	49.0114	0.428142	0.157482	0.00201098	0.00786009
CDKN1C	37.4446	0.375054	0.133408	0.00201614	0.0078741
EIF3D	27.8105	0.388749	0.138236	0.00201827	0.00787628
NXN	26.7933	-0.355682	0.126652	0.00204002	0.00795495
NCR1	18.9203	0.466999	0.172338	0.00205436	0.00800465
CCDC9	52.1782	0.381664	0.137166	0.00206038	0.00802186
DUX5	477.6	0.36341	0.130217	0.00206875	0.00804819
HIKESHI	23.8805	0.433175	0.157797	0.00207753	0.00807605
GGA2	32.7083	0.381237	0.136051	0.00207949	0.0080774
ORMDL3	30.018	0.441661	0.162558	0.00209408	0.00812776
ANP32E	16.4037	-0.425842	0.157543	0.00209805	0.00813687
RPL7	111.896	-0.312098	0.108312	0.00210393	0.00815333
SERPINE1	16.0844	-0.455728	0.173122	0.002128	0.00824025
ARHGEF17	23.6004	-0.399054	0.145981	0.00213234	0.00824808
DDHD2	23.9776	0.447367	0.166118	0.00213474	0.00824808
DVL1	115.526	-0.260614	0.089057	0.00213497	0.00824808
PREB	18.5586	-0.420893	0.156292	0.00214723	0.00828904
NR1D2	27.279	0.442895	0.164134	0.00215159	0.00829947
SRSF2	33.2541	-0.490936	0.187529	0.00215987	0.00832499
MARCHF7	31.7064	0.502536	0.192655	0.00216154	0.00832502
SNAPC4	22.475	-0.374304	0.136029	0.00217348	0.0083632
XBP1	26.9812	-0.354746	0.127443	0.0021748	0.0083632
NACC2	23.9775	0.500659	0.193149	0.00217975	0.0083758
C8orf82	19.9399	-0.383299	0.140156	0.00218336	0.00837745
DRAP1	18.8403	-0.455423	0.173436	0.00218353	0.00837745
ELK4	28.6912	0.41218	0.150796	0.00221534	0.008493
ATP2A2	305.646	0.421732	0.157572	0.00222328	0.00851691
ADGRA3	30.1223	0.374949	0.134514	0.00223071	0.00853883
LAPTM4B	20.0537	-0.401565	0.149297	0.00225121	0.00860603
TXNIP	35.3115	-0.407092	0.150424	0.00225171	0.00860603
MRPS35	21.6045	-0.369614	0.134708	0.00225941	0.00862887
FUS	91.1715	0.339456	0.121193	0.00227738	0.00869086
DENND2B	17.2758	-0.409062	0.152309	0.00227964	0.00869286
POMP	32.0956	0.369774	0.132482	0.00228231	0.00869641
CASQ2	118.867	0.392069	0.143746	0.00229745	0.00874743
IGF2R	42.2036	0.329822	0.11623	0.00229933	0.00874796
IRF2BP2	27.7361	-0.429087	0.161722	0.00230465	0.00876152
SEC14L1	30.7768	0.370152	0.132976	0.00230959	0.00877363
RRAD	49.7639	0.62765	0.267583	0.00231274	0.00877894
ANGPTL2	16.4305	-0.481591	0.187418	0.00232397	0.00881489
PTK2	21.3932	0.454017	0.170285	0.00234308	0.00888063
CHMP1B	25.1459	0.421774	0.156581	0.00236391	0.0089528
TMEM126B	48.977	-0.295718	0.104522	0.00237809	0.00899817
F8A1	21.0103	-0.384048	0.141717	0.00237949	0.00899817
RABL6	40.0809	0.345198	0.123366	0.00238296	0.00900451
NAP1L1	81.5129	0.291735	0.101934	0.00239897	0.00905815
LRRFIP1	31.0606	0.40275	0.147293	0.00240199	0.00906271
MPPED2	22.3162	0.47015	0.177842	0.00240808	0.00907884
PNMA3	28.0995	-0.375148	0.137989	0.00242616	0.00914012
CKM	228.644	-0.509276	0.197573	0.00242826	0.00914115
ELP2	22.6743	0.435016	0.162603	0.0024337	0.00915472
DPYSL2	18.5579	-0.455038	0.176157	0.00243619	0.00915724
UQCC2	23.463	-0.362643	0.132881	0.00246918	0.00927427
RBM4B	18.3666	0.460009	0.173603	0.00247612	0.00929335
AGAP2	21.3146	-0.385796	0.143681	0.0024955	0.00935908
GTF3C6	28.2178	0.379222	0.138409	0.00251404	0.00942153
CCT6A	41.9518	0.336513	0.120581	0.00252272	0.00944698
GOT2	26.7084	-0.368017	0.135157	0.00253585	0.00948904
COMT	17.3596	-0.404282	0.152705	0.00254563	0.00951854
EGLN3	29.4493	0.445703	0.168567	0.0025679	0.00959462
PRKAA1	23.3292	0.453241	0.172048	0.00258927	0.00966726
CD27	56.8982	-0.293928	0.104467	0.00260621	0.00972324
ZCCHC4	25.4281	-0.488559	0.194228	0.00261552	0.0097507
PSKH2	37.9193	0.428442	0.162789	0.00263526	0.00981699
CDC42	38.1537	0.348592	0.126744	0.00266287	0.00991245
BANF1	33.9188	-0.365397	0.135226	0.00270845	0.0100746
DNAAF9	20.8104	-0.388595	0.146393	0.00271247	0.0100821
GPR18	29.0366	-0.347519	0.128001	0.00271541	0.0100855
ACBD6	29.8764	0.498565	0.197073	0.00272525	0.0101146
SLC44A2	22.7537	-0.433789	0.166346	0.00273654	0.0101489
NTN4	19.6852	0.550191	0.220108	0.00276543	0.0102485
SFSWAP	21.7317	-0.368679	0.137612	0.00277129	0.0102626
LHFPL2	20.5367	-0.389329	0.147403	0.00278474	0.0102992
S100A6	49.4303	-0.384839	0.144333	0.00278529	0.0102992
YY1AP1	28.8762	0.397232	0.147966	0.00279874	0.0103413
TNIP1	38.7985	-0.391179	0.147769	0.00282051	0.010414
LARS1	31.9525	0.422381	0.160662	0.00282379	0.0104185
TIMP3	31.9833	0.433065	0.166794	0.00283335	0.0104416
TXNL4A	23.1864	-0.379816	0.14246	0.00283423	0.0104416
SLC39A7	36.2044	-0.329977	0.120942	0.00284192	0.0104622
ZMYM3	27.0808	0.391038	0.145779	0.00286265	0.0105308
NVL	18.1616	-0.434481	0.169584	0.00286534	0.0105329
ATP2B1	45.0204	0.346909	0.127032	0.00286869	0.0105375
GLUD1	24.2017	0.417718	0.158277	0.00288849	0.0106024
CHST14	16.95	-0.410715	0.158811	0.00290109	0.0106409
MYC	39.9595	0.483045	0.19271	0.00291455	0.0106824
CD68	13.0941	-0.54145	0.227852	0.00292331	0.0107067
HSPE1	35.2499	-0.301316	0.109138	0.0029266	0.0107109
DMPK	81.906	-0.404614	0.153581	0.00295346	0.0108013
FNIP2	30.0635	0.369145	0.136631	0.00295976	0.0108164
ABAT	12.4759	-0.460917	0.184523	0.00297018	0.0108466
TEX9	55.7613	0.322477	0.11683	0.00297492	0.010856
TBK1	28.8949	0.483141	0.192919	0.00297812	0.0108595
ATOH8	27.1028	-0.379935	0.143573	0.00298023	0.0108595
SEPTIN8	35.7832	0.37011	0.137742	0.00299053	0.0108891
SEPTIN3	17.6123	-0.409847	0.15808	0.003012	0.010959
C17orf58	32.9866	-0.324998	0.119777	0.00301412	0.010959
MYOCD	13.8173	-0.44424	0.175795	0.00301945	0.0109705
DAPK3	38.8929	0.338016	0.123768	0.00303617	0.0110211
ZC3H7A	27.6505	0.391991	0.147742	0.00303778	0.0110211
ZNF836	33.6387	0.491387	0.198941	0.00306187	0.0111004
RPL39	37.888	-0.398292	0.151757	0.00306446	0.0111017
MPDZ	22.3569	-0.576473	0.122151	0.00307991	0.011145
PRKAR1A	118.171	0.616564	0.276566	0.00308085	0.011145
RPS12	112.08	-0.371696	0.139426	0.00311846	0.0112729
ZFTA	21.9534	-0.380582	0.144621	0.0031349	0.0113202
IFIT2	21.2209	0.489249	0.195013	0.00313608	0.0113202
CCNI	64.2771	-0.312677	0.114629	0.00314345	0.0113386
BATF3	23.0511	-0.384838	0.146822	0.00318902	0.0114883
FAU	32.3595	-0.35251	0.131701	0.00318954	0.0114883
SAMD10	19.5898	-0.418581	0.164049	0.00320008	0.011518
CCND3	19.3075	-0.48483	0.197395	0.00320378	0.011523
MLH1	29.8944	0.371417	0.139581	0.00321478	0.0115489
TOR1AIP2	36.6863	-0.312507	0.115121	0.00321559	0.0115489
FAM236B	10.7975	-0.476791	0.195377	0.00322709	0.0115819
PEAK1	59.5019	0.538169	0.228742	0.003238	0.0116127
ERBIN	25.5122	0.44602	0.175739	0.00324538	0.0116308
STX5	40.8915	0.320039	0.117371	0.00326277	0.0116848
PTPN18	16.9932	-0.411285	0.161892	0.00327384	0.0117108
RNF212	24.7782	0.399988	0.15228	0.0032747	0.0117108
JDP2	20.8052	-0.377637	0.145363	0.00330194	0.0117997
KDM4E	30.5563	-0.34245	0.129002	0.0033134	0.0118322
HNRNPF	22.7701	-0.374879	0.144017	0.00334082	0.0119216
TMEM11	45.5241	0.462664	0.187421	0.00335589	0.0119599
PTP4A2	42.7944	0.313508	0.115	0.00335632	0.0119599
CDPF1	24.258	-0.355442	0.135078	0.0033624	0.0119651
C1S	34.7853	0.433885	0.169537	0.00336257	0.0119651
POFUT2	16.5612	-0.415866	0.164732	0.00337419	0.0119979
PTDSS2	12.329	-0.503452	0.210017	0.00337738	0.0120007
YAP1	31.6661	-0.322436	0.120099	0.00338542	0.0120208
POLQ	16.0402	-0.648092	0.287255	0.00338941	0.0120264
ZNF493	66.8912	0.38463	0.148108	0.00339814	0.0120488
PUS10	16.9364	-0.400009	0.156965	0.00342189	0.0121244
CNN3	68.0876	0.283529	0.102821	0.00343031	0.0121457
EIF3K	62.6574	0.323805	0.11967	0.0034393	0.0121689
PNRC2	26.791	0.379728	0.144491	0.00344758	0.0121896
ANKMY2	15.5515	0.502914	0.202636	0.00345153	0.0121949
SPRY2	26.2126	0.380782	0.145613	0.00349643	0.0123448
MEPCE	166.105	-0.34316	0.129112	0.0035012	0.012353
P4HB	43.9592	0.351761	0.13247	0.00352322	0.0124219
SUMO2	14.5814	-0.515345	0.216244	0.00353194	0.0124439
B3GALNT2	29.3678	0.4103	0.159966	0.00355216	0.0125063
PRDX3	22.5285	0.419755	0.163857	0.00357003	0.0125604
CSTF2T	16.3449	-0.403542	0.159116	0.00357622	0.0125733
ASAP1	26.2361	0.3856	0.147859	0.00360605	0.0126693
CBX8	39.8034	-0.29953	0.111496	0.0036205	0.0127111
TTC39A	28.4939	-0.334219	0.12632	0.00364093	0.0127707
SURF4	19.45	-0.418723	0.167364	0.00364258	0.0127707
EPB42	29.8234	0.42649	0.168321	0.00364752	0.0127791
U2AF2	25.1287	0.399511	0.154577	0.00365048	0.0127805
UBE2G1	29.453	0.364423	0.138716	0.00366363	0.0128176
TOB1	40.2655	0.338844	0.127218	0.00367042	0.0128324
FUBP1	47.4957	0.304793	0.112455	0.00369889	0.0129229
MRPS18B	32.9386	-0.307159	0.114743	0.00372307	0.0129983
KLF6	21.8266	-0.414744	0.166042	0.00377312	0.0131638
ZNF776	37.9625	-0.500479	0.208011	0.00377985	0.0131781
RPS27A	81.6146	-0.32885	0.123455	0.00379203	0.0132114
FMR1	17.4796	0.464662	0.187424	0.00380442	0.0132453
FAM47B	24.4595	-0.343916	0.132054	0.00381627	0.0132738
NSUN5	17.1618	-0.451554	0.18417	0.00381791	0.0132738
LMF2	25.3313	-0.408595	0.162735	0.0038231	0.0132826
ZFP41	34.8238	0.327808	0.122974	0.0038584	0.013396
ARHGEF40	35.4226	0.360372	0.137849	0.00386993	0.0134267
ZNF146	33.3944	0.489372	0.205267	0.00387273	0.0134271
ZSCAN9	17.001	-0.416698	0.167615	0.00388569	0.0134627
ZNF841	28.8876	0.395044	0.154937	0.0039449	0.0136584
AGPAT1	29.7066	-0.343292	0.130992	0.00395335	0.0136781
PACSIN3	49.3562	-0.346214	0.132719	0.00396133	0.0136963
JMJD1C	26.3602	0.400689	0.158233	0.00396985	0.0137072
RPL12	47.8462	-0.452814	0.185038	0.00397167	0.0137072
ANAPC7	30.6698	0.351383	0.134001	0.00397272	0.0137072
PPP1R10	26.0805	0.384493	0.149295	0.00398874	0.0137531
IQCN	16.5949	0.453303	0.18216	0.00399688	0.0137716
CDK4	22.0151	0.394143	0.153578	0.00401023	0.0138081
MXRA7	31.7079	0.452049	0.185183	0.00401595	0.0138183
ZNF333	24.2076	-0.473605	0.194585	0.00403562	0.0138764
CHD7	18.5673	-0.390305	0.156184	0.00406025	0.0139505
RSL1D1	27.9177	0.36176	0.139221	0.00406389	0.0139505
SNX4	25.3616	0.394747	0.155262	0.00406553	0.0139505
SNRPA1	26.1669	0.373865	0.144939	0.00408991	0.0140245
OGN	62.8837	0.41108	0.165831	0.00409329	0.0140265
B3GAT3	65.4842	0.337361	0.129125	0.00410063	0.0140421
COL15A1	29.7175	0.433537	0.176182	0.00412783	0.0141255
ARHGAP26	44.6532	-0.272293	0.101183	0.00413312	0.014134
SAPCD1	17.6117	0.461135	0.18817	0.00415265	0.014191
NIPSNAP2	30.1624	0.360165	0.139256	0.00416785	0.0142333
PKD1	35.5653	-0.311115	0.118723	0.00418272	0.0142682
KSR1	26.0727	-0.34905	0.135975	0.00418378	0.0142682
CRTC1	37.6592	0.319941	0.121218	0.00421202	0.014353
FAHD2B	35.3805	0.314122	0.118335	0.00421438	0.014353
CPSF6	21.8549	0.406138	0.160241	0.0042319	0.0144028
MYH14	32.3595	-0.305765	0.116221	0.00426871	0.0145183
SNX5	27.6016	0.481787	0.202305	0.00427887	0.0145429
SP1	20.3574	-0.513786	0.220153	0.00429156	0.0145761
PRKDC	47.4413	0.303874	0.114438	0.00430247	0.0146033
RAB21	32.0329	-0.33084	0.127713	0.00431988	0.0146525
NDUFB7	27.8942	-0.399354	0.160223	0.00436283	0.0147881
LCMT2	18.3967	-0.372079	0.148194	0.00437436	0.0148172
NPTN	27.4315	-0.375767	0.148451	0.00439267	0.0148691
PNPLA2	48.7432	0.326638	0.125396	0.00440681	0.0149069
ARFRP1	22.02	-0.350323	0.137615	0.00442077	0.014944
TCAF1	37.9301	0.40664	0.164888	0.00442541	0.0149496
KYNU	25.7764	-0.347848	0.136681	0.00444915	0.0150196
SEPTIN4	21.1523	0.526797	0.228742	0.00445407	0.0150261
POLR2L	39.6285	-0.339533	0.13257	0.00446838	0.0150642
PPM1B	24.6901	0.378895	0.149076	0.00448974	0.015126
FAM25A	34.7437	0.454083	0.190586	0.00450124	0.0151461
MAP3K7CL	33.9429	0.419472	0.170861	0.00450175	0.0151461
FAM47A	29.3134	-0.342872	0.134151	0.00451526	0.0151813
HECTD2	17.4914	-0.391608	0.158228	0.00455894	0.0153179
CD33	42.7185	0.390933	0.156331	0.00457926	0.0153759
ADNP	38.4049	0.303587	0.115187	0.00459586	0.0154212
PLXNA1	28.0515	0.365022	0.143539	0.00460397	0.0154381
ZC3H13	40.3548	0.342127	0.133244	0.00463159	0.0155203
TRDN	70.6655	0.284383	0.107758	0.00465592	0.0155914
EMC2	20.3766	0.40984	0.165108	0.00469717	0.015719
CREB3L2	24.6527	0.37627	0.1492	0.00470065	0.0157201
SNRPD2	32.6601	0.332191	0.128469	0.00472828	0.015802
MIDN	33.6946	-0.333076	0.130609	0.00474398	0.0158439
OR8U9	13.0771	-0.414154	0.172807	0.00477502	0.0159369
WNT9A	46.9871	-0.275091	0.104428	0.00479683	0.015999
SBDS	41.1401	0.354915	0.13958	0.00480436	0.0160135
RNF11	31.3683	0.348119	0.13631	0.00481102	0.0160174
MPPE1	16.3835	-0.382209	0.155664	0.00481195	0.0160174
H2AZ2	24.9625	0.371786	0.147647	0.00483662	0.0160888
CS	26.5262	-0.372904	0.149819	0.00486974	0.0161803
MAPK6	30.282	0.367362	0.146336	0.00487059	0.0161803
TEDC2	32.6016	-0.305378	0.118297	0.00489867	0.0162628
BEST4	17.4208	0.466036	0.19693	0.00491449	0.0163045
UBXN1	24.8328	-0.347381	0.139093	0.00494004	0.016377
ATAD1	28.1031	0.361874	0.14335	0.00494287	0.016377
FBL	26.2436	-0.334464	0.132915	0.00496075	0.0164253
HEY1	18.3422	-0.3736	0.151507	0.00496625	0.0164326
MIB1	32.2221	0.331305	0.129177	0.00499594	0.0165104
NDUFB8	34.0695	-0.336161	0.132712	0.00499634	0.0165104
WNT10A	38.706	-0.282646	0.108475	0.00501019	0.0165452
CBX3	24.8425	0.367064	0.145688	0.00504398	0.0166392
RTRAF	27.6703	0.354321	0.139583	0.00504531	0.0166392
PPWD1	27.5886	0.431161	0.180266	0.00506238	0.0166845
MAP2K7	78.8606	-0.215098	0.0797104	0.00507587	0.016718
SCRN1	31.5971	0.337341	0.131724	0.0051	0.0167864
ACADM	25.4593	0.379728	0.152721	0.00510566	0.016794
PPP3R1	35.2006	0.316294	0.122817	0.00512951	0.0168613
TPM4	30.4548	-0.328208	0.130064	0.00518347	0.0170275
ABHD2	25.0527	0.387071	0.156625	0.00519164	0.0170431
MAGOH	27.7856	-0.314592	0.123748	0.00521705	0.0171153
TRIT1	24.1967	0.484994	0.212572	0.00525305	0.0172222
C4B	29.3399	-0.316371	0.124715	0.00526951	0.0172648
MEST	57.1135	-0.4879	0.214716	0.00528666	0.0173097
TLN1	54.0335	0.279363	0.107215	0.00531815	0.0174014
MTRNR2L10	401.645	0.611269	0.309284	0.00535307	0.0175031
MTA3	31.7028	0.38287	0.156497	0.00535625	0.0175031
UGT2B4	10.8356	-0.457964	0.201083	0.0053999	0.0176343
PDE4C	29.5819	-0.303387	0.119164	0.00540906	0.0176527
CILP	28.5828	0.360803	0.144443	0.00542201	0.0176834
TRAFD1	24.7121	-0.333647	0.134118	0.0054468	0.0177474
LRIG1	26.9761	0.359407	0.144045	0.00544874	0.0177474
RAP2B	32.2565	0.366418	0.148285	0.00546021	0.0177732
CAMK2D	42.6381	-0.38822	0.159344	0.00550095	0.0178942
ASL	23.0022	0.394715	0.161148	0.00550993	0.0179117
CILP2	13.0594	-0.424842	0.183515	0.00558927	0.0181579
METTL22	19.8242	-0.406409	0.170654	0.00560263	0.0181787
MSLN	11.7576	-0.4353	0.189044	0.00560294	0.0181787
TRIM72	37.1815	-0.451235	0.195204	0.00561616	0.0182098
KIF14	18.8044	0.438365	0.186312	0.0056226	0.0182188
B3GALT6	19.1623	-0.366975	0.151679	0.00564291	0.0182728
LMNA	70.1143	-0.353632	0.143039	0.00566127	0.0183204
PPP1CB	53.1706	0.325969	0.12988	0.00566816	0.0183308
ITGBL1	24.0126	0.451849	0.196297	0.005705	0.0184381
AGAP3	25.5032	-0.413561	0.174965	0.00572979	0.018501
KCTD12	17.7673	-0.394584	0.165763	0.00573754	0.018501
C7	21.0062	-0.354752	0.14532	0.00573909	0.018501
TNFRSF13B	17.8443	-0.398334	0.169308	0.00573925	0.018501
SH3D21	38.9968	-0.372191	0.154133	0.00577944	0.0186185
NBN	17.3475	-0.37266	0.155621	0.00582001	0.0187371
AKAP13	46.8123	0.292403	0.114497	0.00592324	0.0190487
LRIG2	20.7755	-0.453457	0.199099	0.00592554	0.0190487
VAV2	21.1867	0.397437	0.165122	0.00592821	0.0190487
POLA2	15.6618	-0.397324	0.169415	0.00593717	0.0190653
PSMA1	29.8412	0.348231	0.140578	0.00596194	0.0191325
TEPSIN	19.0563	-0.498743	0.224201	0.00597092	0.0191491
CAMK4	29.3155	-0.305604	0.121691	0.00598909	0.019195
IFT81	24.4948	0.371934	0.152762	0.00600787	0.0192429
CYREN	19.0495	-0.355084	0.146966	0.00602618	0.0192892
KCNH3	89.0603	0.232696	0.0889214	0.00604357	0.0193325
DDX5	54.109	0.363819	0.150406	0.00604918	0.019338
RPL22	63.1614	-0.285137	0.111859	0.00607735	0.0194157
RPS14	75.8601	-0.30588	0.121205	0.00611368	0.0195193
HOMER2	37.691	0.405524	0.172457	0.00612216	0.0195339
RBBP6	20.5936	0.436916	0.191152	0.00612872	0.0195424
DDX3Y	30.0929	0.332162	0.133064	0.00616349	0.0196407
TRAPPC9	32.9236	0.329026	0.131899	0.00618544	0.0196981
SH3YL1	35.5604	-0.414372	0.17928	0.00619692	0.0197221
MYH9	70.3296	0.300884	0.119757	0.00620107	0.0197228
PPP1R9A	35.2882	0.314596	0.125334	0.00620865	0.0197344
TLK2	56.6516	0.323826	0.13062	0.00629101	0.0199834
C18orf32	34.016	0.448442	0.199901	0.00633355	0.0201058
CEPT1	24.3154	0.361172	0.148231	0.00633872	0.0201095
POGZ	18.9316	0.396322	0.165232	0.00634765	0.020125
RNF144A	16.7345	-0.372437	0.157595	0.00639885	0.0202745
CLTC	31.4409	0.362824	0.149681	0.00642802	0.020354
RPS19	56.0356	-0.534096	0.250069	0.0064551	0.0204269
BEX1	16.9534	0.429061	0.184708	0.00652184	0.020625
HEYL	27.4383	0.340478	0.13863	0.00653683	0.0206593
SRGAP3	34.3646	0.345985	0.142863	0.00655127	0.0206792
PDE4D	47.8842	-0.272959	0.107746	0.00655139	0.0206792
CPO	23.6354	-0.364544	0.152862	0.00657124	0.0207288
PHC2	64.1118	-0.225878	0.0873174	0.00657896	0.0207401
DCHS2	27.8786	0.376137	0.156527	0.00658662	0.0207512
CTSZ	28.3242	0.355623	0.146913	0.00660673	0.0208014
CAPN15	33.9079	0.318167	0.128639	0.00665855	0.0209514
ZNF746	21.6813	-0.345285	0.144166	0.00667834	0.0210005
TPR	22.6276	0.369066	0.152434	0.00668702	0.0210146
PEX11G	22.6973	-0.358771	0.151555	0.00676325	0.0212297
PCBP2	63.3167	0.246785	0.096249	0.00676398	0.0212297
DNAJB14	23.2445	0.373701	0.156419	0.00678485	0.0212819
UBE2D2	27.6345	0.34434	0.140987	0.00680094	0.021319
TTYH2	29.659	0.345984	0.142491	0.00683584	0.021415
POLR1E	23.4549	-0.34543	0.14393	0.00684925	0.0214436
AREG	24.5299	0.418823	0.181008	0.00686011	0.0214641
UCHL1	30.7008	-0.349451	0.147033	0.00686976	0.0214809
ATP2B4	46.6456	0.278091	0.110153	0.00689035	0.0215318
H2BC10	14.579	-0.389059	0.169041	0.0069029	0.0215576
TUBG1	15.9188	-0.380823	0.164516	0.00691683	0.0215876
NPM2	32.3836	0.443636	0.198591	0.00694446	0.0216603
NEO1	34.8695	0.387921	0.166665	0.00695329	0.0216743
OR10G3	29.4034	0.340278	0.140269	0.00698265	0.0217523
AHSA1	26.4001	0.40796	0.177161	0.00699661	0.0217822
UPF2	51.119	0.490459	0.2327	0.00707641	0.022017
TGFBR1	24.205	0.362966	0.152054	0.00710672	0.0220975
MRPS24	25.3536	0.356627	0.14911	0.00711803	0.022119
CKAP4	24.4787	-0.366366	0.156803	0.00712532	0.0221279
WASF2	22.58	0.372735	0.156824	0.00715657	0.0222111
PDCD6IP	25.2435	0.354547	0.147955	0.00716134	0.0222121
ARPP21	34.5151	-0.434371	0.195207	0.0071855	0.0222733
TRAM2	24.3209	-0.370264	0.159463	0.00721333	0.022337
OTUD6B	30.0993	0.353334	0.147227	0.00721497	0.022337
OCIAD2	20.5674	0.419105	0.18384	0.00726276	0.0224624
ZNF800	22.6436	0.390576	0.168073	0.00726449	0.0224624
SRF	25.4131	-0.306861	0.125908	0.00727216	0.0224723
GALNT5	16.9743	-0.55234	0.274678	0.00728623	0.0225019
ITGAV	42.3074	0.293105	0.118038	0.00732826	0.0226177
RFXANK	20.8624	-0.337282	0.141586	0.0073548	0.0226847
SHPK	11.4942	-0.425301	0.192506	0.00736171	0.0226847
CNOT1	23.798	0.35316	0.147533	0.00736358	0.0226847
HDGFL3	25.6338	0.408085	0.178366	0.00739391	0.0227542
ATP5PO	36.4884	-0.3304	0.137413	0.00739523	0.0227542
COX5A	42.9396	0.345404	0.145462	0.00740162	0.0227599
DMRTC2	17.5131	-0.392162	0.170457	0.00742082	0.0228049
LGALS7B	22.0421	0.422346	0.186428	0.00745045	0.0228819
LRSAM1	19.4984	0.397398	0.170976	0.00745742	0.0228893
ZNF579	18.2472	-0.360991	0.155144	0.00749587	0.022983
PHAX	93.7665	0.32817	0.13623	0.00749768	0.022983
HSF2	25.9378	0.457179	0.212439	0.00750174	0.022983
CUTA	27.8056	-0.416188	0.184693	0.00753331	0.0230656
UTP3	25.4902	0.400419	0.175605	0.0075477	0.0230955
HEXIM1	22.9429	-0.370983	0.159785	0.00758815	0.0232051
FAM180B	28.6011	-0.336188	0.142469	0.00760248	0.0232347
FBXW12	36.0004	0.36042	0.153487	0.00763596	0.0233228
RAP1GAP2	24.5463	0.355241	0.150064	0.0076562	0.0233703
RPS6KB2	33.9588	-0.397152	0.176727	0.00768472	0.0234431
AAMP	162.886	-0.203801	0.0794951	0.00769072	0.023446
CBLIF	14.0451	-0.455559	0.209787	0.00769504	0.023446
SOD2	24.8073	-0.335451	0.142124	0.00770765	0.0234701
ZNF274	22.7077	0.36574	0.155138	0.00774265	0.0235623
FBXO31	19.5805	-0.4301	0.196999	0.00782603	0.0238016
PCNX1	29.6882	0.356319	0.151331	0.00784199	0.0238356
CLTA	25.9099	0.338665	0.141674	0.00784934	0.0238435
HSD17B4	22.7552	-0.320675	0.134999	0.00785569	0.0238483
UPK3BL2	38.1291	-0.311337	0.129388	0.00788759	0.0239306
MDGA2	24.0447	0.420772	0.187495	0.00790043	0.0239411
SRSF5	57.6484	-0.301575	0.124704	0.00790061	0.0239411
FRMPD1	23.0503	0.381976	0.166031	0.0079228	0.0239938
PHLDB2	31.6499	0.40603	0.180389	0.00794315	0.0240409
RPS21	36.6171	-0.406585	0.18173	0.00800724	0.0242202
CCM2L	24.4066	-0.314151	0.132023	0.0080399	0.0243043
AP3S1	28.4666	0.35635	0.152369	0.00807734	0.0244027
AGRP	12.8662	-0.393356	0.176723	0.00809151	0.0244308
LUC7L	18.6364	-0.353685	0.153893	0.00819754	0.024736
ACOT1	21.5345	-0.336329	0.144417	0.0082505	0.0248808
CTSA	34.0789	-0.269697	0.110019	0.00826798	0.0249185
PI4KB	25.6837	0.349209	0.148913	0.00827644	0.024929
RABGAP1	19.195	0.382099	0.166328	0.00834259	0.0251131
JPH2	41.7699	-0.305344	0.126603	0.00836269	0.0251585
ARGLU1	26.6408	0.358798	0.155006	0.0084119	0.0252913
SLN	206.925	0.479411	0.23522	0.00842275	0.0253087
JPT2	20.752	-0.33403	0.143791	0.0084775	0.0254579
SRA1	16.8578	0.4101	0.181562	0.00853644	0.0256196
JUND	26.4226	-0.500834	0.244501	0.0085472	0.0256365
NR1H3	22.3953	-0.341751	0.147894	0.00855475	0.0256438
ZNF805	19.2067	-0.329893	0.141723	0.008598	0.025758
PARP2	25.8673	0.367846	0.160416	0.00866924	0.0259558
WBP1	23.2121	0.349384	0.149406	0.00868868	0.0259985
DHPS	27.62	0.388896	0.174173	0.00873557	0.0261232
IGDCC4	28.8987	-0.30339	0.128038	0.00876728	0.0262023
TOP2A	19.7816	-0.351497	0.153706	0.00883602	0.026392
DLG5	26.9971	0.347925	0.150969	0.00894373	0.0266978
TMEM213	95.6954	0.251136	0.102344	0.00895933	0.0267284
MFAP4	46.6506	-0.327519	0.14118	0.00896595	0.0267322
TWSG1	32.8308	0.300575	0.125328	0.00899079	0.0267749
WASHC2A	19.7217	-0.333365	0.145147	0.00899096	0.0267749
NOC2L	22.1692	-0.371534	0.165316	0.0089973	0.0267778
ATP5ME	34.1368	-0.271886	0.113422	0.00913497	0.0271714
H2AZ1	25.5967	-0.312967	0.134118	0.00917938	0.0272873
ESYT2	27.0554	0.347418	0.15085	0.00920138	0.0273364
NOTCH2	28.5737	0.39897	0.181662	0.00921893	0.0273723
TOMM6	33.7292	0.303642	0.12758	0.00923621	0.0274073
HNRNPU	82.4927	0.240995	0.0976226	0.0092708	0.0274882
THY1	25.1633	-0.318432	0.137085	0.00927444	0.0274882
GMPPA	24.9351	0.363853	0.160202	0.00930828	0.0275697
RPF2	18.9378	0.437008	0.205119	0.00931296	0.0275697
PLEKHA4	69.2022	-0.219383	0.0884084	0.00935806	0.0276808
MFN2	25.2721	-0.294742	0.12487	0.00936517	0.0276808
AP2A2	24.0633	0.351065	0.152215	0.00936711	0.0276808
LMCD1	27.0224	-0.314384	0.135498	0.00939213	0.0277384
H2AC13	21.8257	-0.317694	0.137563	0.00948972	0.0280101
SCARF2	31.5412	0.378566	0.168965	0.00953273	0.0281204
HSPA5	40.1361	0.385926	0.176049	0.00954101	0.0281283
METTL3	21.2279	-0.327415	0.142725	0.00955422	0.0281506
DESI1	17.5553	-0.381919	0.174072	0.00957463	0.0281942
ACTR1B	17.7291	-0.353266	0.157682	0.00959068	0.0282248
IDH2	59.7144	-0.302104	0.128884	0.00965812	0.0284066
SRRM3	38.3647	-0.260094	0.108465	0.00975214	0.0286662
SELENOW	79.1761	0.319548	0.137985	0.00976425	0.028685
KCTD7	23.5041	0.400185	0.182099	0.00981014	0.0287915
PUF60	39.4944	-0.345188	0.152247	0.00981203	0.0287915
PRMT5	20.204	-0.325633	0.143171	0.00993398	0.0291323
PTPRS	25.5163	-0.312363	0.135554	0.00994123	0.0291365
SAE1	32.2438	-0.295203	0.126077	0.00998063	0.0292348
SSU72	28.3703	-0.287765	0.12315	0.00999188	0.0292507
TBC1D22A	26.6545	0.353823	0.155887	0.0101132	0.0295886
UBN2	23.1273	0.37472	0.168718	0.010127	0.0296116
NUP35	16.6559	-0.376627	0.172332	0.0101901	0.0297786
PRDX6	35.8799	-0.326598	0.143254	0.0102088	0.0298159
LCNL1	17.5841	-0.379668	0.174438	0.0102392	0.0298871
SLC35E2A	30.0291	0.371821	0.167991	0.0102697	0.0299586
CARMIL3	11.4562	-0.39406	0.185839	0.0102779	0.0299651
PAG1	21.16	0.371976	0.167939	0.010374	0.0302279
MAGED1	87.1925	0.280904	0.119062	0.0104381	0.0303968
ICMT	15.8589	-0.364943	0.168049	0.0104584	0.0304383
SPTBN1	95.3649	0.254554	0.106186	0.0105105	0.0305721
RABGGTB	30.5307	0.301768	0.129231	0.0105264	0.0306007
NUCB2	18.7733	0.408982	0.190461	0.0105379	0.0306034
THEM5	89.9535	-0.254381	0.106572	0.0105396	0.0306034
LRRFIP2	50.8059	0.247201	0.102531	0.0105472	0.0306077
RANGAP1	27.7274	-0.300828	0.130758	0.0106309	0.0308328
ARHGAP11A	16.9637	-0.34357	0.155554	0.0106421	0.0308474
IRF3	24.1355	-0.34045	0.152514	0.0107631	0.0311801
SOGA1	72.0816	0.348695	0.156958	0.0108135	0.0312952
VASH2	33.9668	0.357519	0.161052	0.0108154	0.0312952
TSGA10	24.3138	0.428398	0.20629	0.0108301	0.0313139
HSPB7	45.7239	-0.384749	0.179176	0.0108344	0.0313139
CYB5R3	34.9451	-0.270866	0.11549	0.010851	0.0313439
XAF1	22.4899	-0.325716	0.145086	0.0108849	0.0314238
INPP4B	31.4822	0.331754	0.145872	0.0108996	0.0314479
RBM6	25.7066	0.365145	0.164608	0.0109447	0.0315598
TLE6	22.3975	-0.400063	0.189532	0.0109722	0.0316146
NOMO3	35.6374	0.291818	0.125502	0.0109763	0.0316146
RAB1A	45.5454	-0.244102	0.102895	0.0110158	0.0316957
C6orf62	27.6338	0.31929	0.139384	0.0110172	0.0316957
SFT2D1	16.7295	-0.341245	0.154549	0.0111084	0.03194
IMMT	27.0993	0.332999	0.147617	0.0111711	0.0321018
UBE2Z	129.576	0.303858	0.13333	0.011298	0.0324352
CDC42EP5	23.5188	-0.322743	0.144232	0.0113001	0.0324352
ARMCX2	29.7344	0.303274	0.131621	0.0113409	0.0325335
TTLL1	16.733	-0.336556	0.153216	0.0113539	0.0325521
TACC1	34.958	0.320979	0.142133	0.0113861	0.0326259
GPATCH11	28.1115	0.397831	0.189108	0.0113974	0.0326394
OSBPL3	22.9007	-0.364113	0.16647	0.0114734	0.0328384
DICER1	22.6027	-0.32107	0.144398	0.0114935	0.0328769
ACO2	49.5848	0.260876	0.110766	0.0115724	0.0330838
USP46	23.379	-0.320344	0.144318	0.0116381	0.0332526
GAST	26.4552	-0.380529	0.180126	0.0117025	0.0334175
GOLGA8A	119.912	-0.328123	0.146635	0.0117281	0.0334717
BMP15	14.581	0.400319	0.187797	0.0117385	0.0334822
WNT10B	41.3398	0.375937	0.176388	0.0117676	0.0335462
PPM1G	23.3926	-0.336237	0.15264	0.0117778	0.0335561
GALR3	23.3835	-0.299625	0.13286	0.0117929	0.0335799
CYCS	70.5194	0.285994	0.124186	0.0118049	0.033595
PSME3	26.8083	0.328332	0.146611	0.0118524	0.033711
ZZZ3	17.8824	0.448286	0.2223	0.0118895	0.0337971
MELK	12.2541	0.424534	0.202969	0.0119687	0.0340032
ZNF674	36.8635	0.273233	0.117864	0.011996	0.0340612
IGSF1	19.4785	0.363736	0.167287	0.0120367	0.0341575
GGNBP2	32.4781	0.300541	0.131238	0.0120502	0.0341763
PSMG3	74.4442	-0.23992	0.102107	0.0120753	0.0342166
NDUFS5	33.3543	-0.259299	0.111715	0.0120781	0.0342166
INKA2	19.9903	-0.421095	0.207814	0.0120917	0.0342358
NAA15	24.6943	-0.294272	0.130574	0.0121938	0.0345055
RPS15A	38.1454	-0.403939	0.195024	0.0122353	0.0346033
SRPK1	25.0457	-0.285483	0.126217	0.0122592	0.0346512
FRA10AC1	27.7869	0.312336	0.13839	0.0123107	0.0347772
DCP2	14.6883	-0.354493	0.166754	0.0123605	0.0348981
ARFGAP2	19.1531	-0.343861	0.159661	0.0124068	0.0350092
RING1	25.2258	-0.300663	0.134762	0.0124172	0.0350145
TMEM47	24.5018	-0.312863	0.140615	0.0124227	0.0350145
DAG1	35.1929	0.328497	0.148203	0.0124617	0.0350945
ATXN10	34.6035	-0.326251	0.148952	0.0124678	0.0350945
CPLANE1	24.3908	0.33791	0.152863	0.0124721	0.0350945
ART5	22.6331	0.335799	0.152312	0.0126943	0.0356996
KANSL2	20.7792	-0.312839	0.141999	0.0127143	0.0357357
ANKLE2	27.2288	-0.285202	0.1267	0.0128072	0.0359767
OLFML2A	37.9434	0.297435	0.131961	0.0128151	0.0359787
VEGFA	27.3628	0.348342	0.161054	0.0128675	0.0361054
ADGRL1	24.4515	0.377557	0.18086	0.0129372	0.0362808
ZNF787	26.9239	-0.291035	0.130083	0.0129494	0.0362947
NUCKS1	66.4929	-0.355654	0.166874	0.0129579	0.0362982
NHLH2	295.094	0.219808	0.0935442	0.0129741	0.0363232
ODC1	24.1675	0.350553	0.162431	0.013072	0.0365768
SACS	70.2435	0.374021	0.180599	0.013139	0.0367436
CFL1	46.0927	0.315944	0.14294	0.0131681	0.0368045
ALDOB	23.6432	0.326997	0.14822	0.0132007	0.0368679
BIRC5	108.165	-0.306231	0.138051	0.0132055	0.0368679
SIRT6	20.1398	-0.388691	0.192832	0.0132146	0.0368726
PLEKHG2	17.9754	-0.326228	0.151532	0.0132372	0.0369114
ZBTB41	28.8255	-0.559319	0.319666	0.0132432	0.0369114
CNR1	55.6921	0.520087	0.304591	0.0132916	0.0370256
SOX9	50.2791	-0.218814	0.0935317	0.0133734	0.0372327
UQCR11	32.4447	-0.322543	0.149418	0.0133995	0.0372725
SF3B3	28.7487	0.300492	0.134761	0.0134026	0.0372725
MPC2	30.6776	-0.335419	0.155637	0.0134248	0.0373134
GNG14	24.2776	-0.310643	0.141897	0.013507	0.037521
PPP2R1A	29.2148	-0.345783	0.16257	0.0136113	0.03779
ORAI2	22.7974	-0.2942	0.132754	0.0137929	0.0382727
ASMTL	20.7244	0.382828	0.184469	0.0138264	0.0383446
TMUB2	24.415	0.317169	0.144076	0.0138637	0.0384267
SMIM4	19.2388	-0.312943	0.144802	0.0138766	0.0384411
FAM53B	22.267	-0.300826	0.136986	0.0138853	0.0384438
ZNF768	46.8433	-0.270207	0.120407	0.0139146	0.0385037
MATN2	41.8462	-0.27209	0.120754	0.0139297	0.0385057
TRIO	42.3725	0.248446	0.108574	0.0139307	0.0385057
ACTL6A	29.3897	0.352464	0.16696	0.0139524	0.0385443
CHSY3	29.3587	0.333957	0.154306	0.013983	0.0386059
TERF2IP	30.8876	0.295936	0.13266	0.0139901	0.0386059
ATM	19.9378	0.359447	0.169752	0.014091	0.0388629
CSRNP2	59.8206	0.29208	0.131686	0.014123	0.0389297
TBRG1	19.0344	-0.328883	0.155565	0.0141956	0.0390993
MCAM	38.6016	0.293743	0.131931	0.0142002	0.0390993
PTPRR	14.003	-0.36412	0.179167	0.0143232	0.0394165
COA3	26.2922	0.327891	0.151395	0.0143586	0.0394766
SLC2A4RG	21.3749	-0.300098	0.137856	0.0143609	0.0394766
MKLN1	25.3343	0.333487	0.155061	0.0143993	0.0395606
ZNF852	24.3621	0.338695	0.159422	0.0144221	0.0396015
IZUMO2	23.2546	-0.287488	0.131094	0.0144908	0.0397683
SGSM2	25.0151	0.307494	0.13998	0.0145452	0.0398956
SCYL2	22.7321	0.327968	0.152407	0.0145583	0.0399098
DPPA2	44.9062	0.310913	0.143288	0.0146679	0.0401882
RBBP4	24.0763	0.335816	0.156767	0.0146938	0.0402369
PET100	20.2673	-0.325037	0.153156	0.0148078	0.0405272
H1-5	21.9059	-0.330558	0.156906	0.0148168	0.0405294
UBB	76.2798	0.273665	0.122976	0.0148482	0.0405933
PJA2	38.011	-0.269266	0.121588	0.0148676	0.040624
GPR42	16.0072	-0.380408	0.192207	0.0148827	0.040643
RIOK2	27.3235	-0.28143	0.127804	0.0148966	0.0406588
USP14	19.6717	-0.346677	0.167482	0.014948	0.0407769
PPIG	34.8411	0.29687	0.134645	0.0149684	0.0408103
TET3	420.556	0.189365	0.0811006	0.014994	0.0408579
ADPRS	71.007	-0.25296	0.112335	0.0150027	0.0408592
ZNF799	36.3494	0.34089	0.161951	0.0150262	0.0409009
NUDCD3	24.7978	-0.304606	0.141403	0.0151176	0.0411274
HOXB13	21.7287	0.403624	0.204312	0.0151494	0.0411914
PTPRM	25.4036	0.313825	0.14483	0.0151755	0.0412229
RAD9A	18.0849	-0.341533	0.165597	0.0151774	0.0412229
PSMB3	27.3911	0.309158	0.14217	0.0152531	0.0414061
DCTN2	33.2275	0.273364	0.122778	0.0153257	0.0415582
ZCCHC10	23.5864	-0.295812	0.137209	0.0153258	0.0415582
ANXA11	38.4517	0.268945	0.120265	0.0153787	0.041679
IGFL3	12.3904	-0.35468	0.174989	0.0153988	0.0417109
FBLN2	14.9515	-0.359714	0.176788	0.0156244	0.0422992
FZD4	27.5652	0.342081	0.164298	0.0156614	0.0423536
DOCK5	35.2057	0.395269	0.201273	0.0156614	0.0423536
GBF1	25.7009	0.31457	0.146417	0.0156722	0.0423597
CFDP1	93.5808	-0.207178	0.090366	0.0156873	0.0423778
TMEM64	19.4526	-0.342227	0.166513	0.0157108	0.0424065
ACOX3	15.7751	-0.333839	0.161228	0.0157149	0.0424065
MRPL30	24.863	0.328964	0.155311	0.0157697	0.0425315
CDIP1	27.7165	0.307658	0.142461	0.0158919	0.0427952
CTDSP1	18.6266	-0.356011	0.176644	0.0158958	0.0427952
NT5DC2	17.4005	-0.328592	0.157618	0.0158973	0.0427952
LSM4	29.2048	0.282556	0.127937	0.0159017	0.0427952
PNPO	19.7162	0.344979	0.164652	0.0159185	0.0428174
RAB10	21.4687	0.32127	0.150096	0.0159414	0.0428559
RHBDD2	13.3043	-0.34571	0.169711	0.0160381	0.0430928
WDR74	21.4923	0.32192	0.150966	0.0160631	0.0431368
IK	34.6463	0.266362	0.119741	0.0161196	0.0432652
ZIC3	30.0962	-0.320888	0.153507	0.0161615	0.0433515
EIF5A	54.2006	-0.293166	0.135869	0.0161696	0.0433515
ZNF320	17.3359	-0.327165	0.157994	0.0161778	0.0433515
UBA1	42.6302	-0.258871	0.116837	0.0162209	0.0434265
ABCC3	14.7959	-0.342667	0.168058	0.0162231	0.0434265
NBPF6	14.822	-0.526887	0.311624	0.0162811	0.0435585
PSG11	39.3143	0.306715	0.143331	0.0163298	0.0436653
ANP32B	22.2055	-0.299164	0.141421	0.0164549	0.0439765
ADAMTS2	25.5055	0.345404	0.167268	0.0165711	0.0442633
MYBPC2	151.277	0.211526	0.0931048	0.0165906	0.0442918
CTDSP2	37.4519	0.320791	0.152921	0.0166025	0.0442995
ADGRG1	20.5035	0.339676	0.163852	0.0166112	0.0442995
S100A10	27.0579	-0.282308	0.131195	0.0166462	0.0443692
ALDH3B2	27.468	-0.274491	0.126936	0.0167175	0.0445166
HTRA1	48.2168	0.300822	0.140529	0.0167193	0.0445166
UROS	28.1283	0.311964	0.147407	0.0167529	0.0445736
AARS1	32.7455	0.283191	0.130385	0.0167585	0.0445736
SCARB2	40.1602	0.290711	0.134546	0.0167782	0.0446023
RPL30	76.1823	-0.262003	0.119549	0.0168388	0.0447396
KBTBD11	23.2728	-0.354338	0.177302	0.0168512	0.0447488
KLHL6	23.9379	0.318443	0.151511	0.0168722	0.0447806
VPS13B	22.816	0.320425	0.152012	0.0168865	0.044795
PPIF	29.3238	0.333313	0.160626	0.0169448	0.0449257
C1orf105	37.8322	0.269099	0.122428	0.0170257	0.0451163
PAPSS1	17.4991	-0.30716	0.147227	0.0170548	0.0451695
FAM118B	13.213	-0.343542	0.17089	0.0171103	0.0452925
PRMT2	36.285	-0.237098	0.106794	0.0171227	0.0453014
CFH	29.2978	0.302704	0.142522	0.0171339	0.045307
PRSS23	15.9822	-0.335567	0.165133	0.0171667	0.0453697
MICALL1	34.0672	0.276058	0.126863	0.0171869	0.0453991
H1-0	77.2704	0.272738	0.126612	0.0172799	0.0456208
C16orf78	89.5104	0.248139	0.112451	0.0173241	0.0457134
XRCC5	42.8183	0.25626	0.116288	0.017342	0.0457364
RAVER1	15.35	-0.333149	0.164774	0.0173605	0.0457611
DDRGK1	52.0107	0.260137	0.118991	0.0174011	0.0458439
CCN3	23.7175	0.348233	0.171601	0.0174207	0.0458714
PICALM	25.5667	0.361381	0.180259	0.0175495	0.0461862
C9orf43	28.1837	0.394633	0.205972	0.0175807	0.0462441
TRIR	27.6022	-0.278462	0.130658	0.0176319	0.0463427
CUEDC1	23.8979	-0.28322	0.133351	0.0176367	0.0463427
CYLD	31.2265	0.325972	0.156949	0.0176495	0.0463519
SMARCC2	33.9856	0.285655	0.133125	0.017691	0.0464365
EXOSC6	35.9637	-0.29214	0.137722	0.0177003	0.0464365
FGF6	22.8633	-0.304179	0.146622	0.017722	0.0464691
TIAL1	38.2087	0.278943	0.129684	0.0177528	0.0465256
CNN1	33.5593	0.322446	0.154817	0.0178172	0.04667
SLC35F3	31.5047	0.302569	0.1435	0.0179146	0.0468931
URB2	14.402	-0.349752	0.177272	0.0179212	0.0468931
LAMP1	23.4506	0.308616	0.146692	0.0180585	0.0472278
AEBP1	23.4057	-0.283755	0.134551	0.0180687	0.0472298
NDUFB6	46.7921	0.309306	0.149265	0.0181617	0.047448
TNRC6C	26.1007	0.308439	0.147344	0.018212	0.0475547
SLC11A2	21.9926	0.368076	0.185821	0.0182234	0.0475596
XRN2	25.7194	0.305239	0.14535	0.0182819	0.0476875
MITD1	30.0055	0.307034	0.146823	0.018306	0.0477254
ETFA	29.2564	-0.263347	0.122524	0.0183547	0.0478274
OGA	32.147	0.28061	0.131269	0.0184208	0.0479745
RGS3	28.8208	0.312396	0.150255	0.0186337	0.0485039
TNNC2	505.784	-0.36412	0.184464	0.0187131	0.0486853
NDEL1	26.9679	0.326859	0.159381	0.0187478	0.0487501
C22orf15	12.4842	-0.346506	0.176465	0.0187732	0.0487907
PAK4	26.1771	-0.273423	0.129457	0.0188013	0.0488384
CDC37	43.6268	-0.253253	0.117406	0.0188868	0.0490352
TNFAIP8L3	21.799	0.330825	0.162199	0.0189144	0.049058
AKR1E2	37.4224	0.280172	0.130692	0.0189152	0.049058
BBLN	40.0141	-0.230622	0.105617	0.0189389	0.0490938
ACTR3	45.1475	0.289671	0.137823	0.0189857	0.0491763
CGGBP1	26.811	0.288315	0.135452	0.0189903	0.0491763
COX7A1	20.1968	-0.294786	0.142571	0.0190463	0.0492851
LOXL1	34.6209	0.327295	0.161976	0.0190521	0.0492851
STK40	22.2096	0.327142	0.161399	0.0193237	0.049962
FAM171A1	22.7901	0.301431	0.14396	0.01934	0.0499784
MTCH2	45.8392	0.229263	0.104697	0.0194384	0.0502067
RC3H1	22.1513	0.326205	0.161028	0.0195483	0.0504645
NEDD8	38.3944	-0.238003	0.110356	0.0195826	0.050527
FTSJ3	25.7017	0.298185	0.143251	0.0196451	0.0506621
LYPD1	33.9173	0.337874	0.17091	0.0196968	0.0507298
NOTCH2NLA	32.981	0.268626	0.12585	0.0196997	0.0507298
GSTP1	27.6835	-0.307296	0.150736	0.0197018	0.0507298
UPB1	20.9934	-0.281901	0.13586	0.0197579	0.0508482
ATP5MJ	32.701	-0.251088	0.117557	0.0198026	0.0509369
EEF1B2	28.8202	-0.275867	0.131217	0.0198453	0.0510123
TRIM44	24.4509	0.299761	0.144362	0.0198523	0.0510123
TMEM63A	27.8209	0.368747	0.192335	0.0198928	0.0510902
ZNF208	49.829	0.27019	0.127799	0.019923	0.0511211
CCT2	39.7268	0.269126	0.127116	0.0199253	0.0511211
MED13L	24.3166	0.313873	0.153174	0.0200352	0.0513769
RAD50	17.5147	0.346147	0.174304	0.0201406	0.0516205
CRYBG3	21.6317	0.316877	0.154892	0.020219	0.0517951
COX4I1	42.7564	-0.326161	0.16263	0.0202623	0.0518684
DOK3	23.0183	-0.279289	0.135018	0.0202684	0.0518684
PRSS3	22.0172	-0.343348	0.176172	0.0203738	0.0521116
FAM171A2	38.101	0.266924	0.125627	0.0203879	0.0521208
KIF2C	21.8288	0.312399	0.152786	0.0204699	0.0522864
ZNF783	16.659	-0.308519	0.153884	0.0204735	0.0522864
TNNT1	543.997	-0.38825	0.206902	0.0205743	0.0525168
EFR3B	29.5184	-0.269433	0.129587	0.0206678	0.0527287
ZBTB24	24.4722	-0.271178	0.130275	0.020768	0.0529574
TNIK	34.1089	-0.275282	0.132961	0.0208095	0.0530361
VHL	27.7152	-0.27057	0.130131	0.0208827	0.0531728
RPL19	103.552	-0.269013	0.128074	0.0208844	0.0531728
WDR89	22.4024	0.332223	0.166482	0.0209223	0.0532424
SRL	105.147	0.279988	0.135611	0.0209342	0.0532454
TAL1	17.4342	-0.307734	0.153925	0.0209532	0.0532668
NCS1	20.7506	-0.30045	0.149507	0.0209761	0.0532979
NBPF26	21.5274	-0.329812	0.167315	0.0209916	0.0533101
ST3GAL3	21.3636	-0.2862	0.140594	0.0210591	0.0534545
CALM2	25.2612	-0.287761	0.140639	0.0211852	0.0537473
CIBAR1	21.9752	0.328696	0.16444	0.0212115	0.0537866
RNF24	38.882	-0.235893	0.1104	0.0212788	0.0539278
BCORL1	22.0394	0.320781	0.16003	0.0212887	0.0539278
TNNC1	247.93	-0.359245	0.186955	0.0213362	0.0540207
C1QTNF4	21.9763	0.327032	0.164837	0.0214223	0.0542114
KLF12	26.5953	0.306706	0.152588	0.0214337	0.0542127
CPN1	16.1223	-0.315266	0.160605	0.0214807	0.0543041
IBSP	22.6245	-0.300355	0.150573	0.0215245	0.0543875
ZMYM4	36.0535	0.298391	0.146643	0.0215504	0.0544253
TTC23	24.6092	0.355439	0.186876	0.0215815	0.0544763
PSD2	24.7303	0.296582	0.144947	0.0216494	0.0546203
SEC31A	44.5757	0.275172	0.1329	0.0216888	0.0546922
PCGF2	17.6823	-0.299059	0.149865	0.0217192	0.0547412
SLC9C2	20.0542	0.348712	0.180527	0.0217704	0.0548426
MBD3	34.1187	-0.254437	0.121741	0.0220593	0.0555423
MIOS	18.7464	0.346488	0.180032	0.0221106	0.0556434
IER3IP1	26.9158	0.292078	0.143138	0.0222364	0.0559321
DDX50	53.1379	0.238741	0.112629	0.0222559	0.055953
BVES	25.6236	0.31697	0.158643	0.0223771	0.0562239
RHEB	23.5322	-0.2778	0.136546	0.0223862	0.0562239
ACVR2A	25.7394	-0.275049	0.1348	0.0224811	0.056434
UBE2H	48.9334	0.255474	0.122567	0.0226513	0.0568326
VAPB	24.7529	-0.310304	0.157949	0.0227928	0.0571591
NUSAP1	13.7478	-0.342844	0.181678	0.0228153	0.057187
PRRX1	34.6603	0.292455	0.144888	0.022958	0.0575156
CREB3	27.5445	-0.260194	0.127061	0.0229767	0.0575338
GDI1	22.1027	-0.375265	0.206401	0.0230898	0.0577881
[truncated: 3,004 more rows]

## Sheet: PAX7WT_Post_vs_pre
Gene	baseMean	log2FoldChange	lfcSE	pvalue	padj
TET3	33.0175	-1.30455	0.147338	8.32413e-20	5.04536e-17
NFYA	100.615	-1.17931	0.134195	1.02862e-19	5.04536e-17
MTRNR2L1	21.5892	-1.65461	0.201767	2.2939e-17	7.50106e-15
PRMT8	118.776	-1.17703	0.146654	6.24192e-17	1.53083e-14
MYH3	78.4276	-1.40833	0.198499	6.82747e-14	1.33955e-11
ZNF587	16.6681	-1.29133	0.184695	2.91411e-13	4.76457e-11
ETV3	20.82	-1.1765	0.171138	5.99476e-13	8.40122e-11
NHLH2	19.4743	-1.36292	0.199783	8.11148e-13	9.94671e-11
ZNF140	39.8485	-1.13569	0.175715	7.27132e-12	7.92573e-10
FBXO15	10.4225	-1.68284	0.267451	3.48723e-11	3.42098e-09
ZNF383	15.9737	-1.36891	0.224086	8.44102e-11	7.52786e-09
ZNF506	40.4613	-1.06815	0.177759	1.34044e-10	1.09581e-08
C4orf46	17.3625	-1.18006	0.196465	1.67446e-10	1.26357e-08
PDCD4	16.4346	-1.0666	0.179593	2.90542e-10	2.03587e-08
DYNC1H1	13.3751	-1.28638	0.218355	3.67877e-10	2.40591e-08
FAM13B	18.2391	-1.36312	0.234862	4.6852e-10	2.87261e-08
LYRM2	30.2984	-1.00822	0.177671	1.07195e-09	6.18578e-08
ZNF267	11.8009	-1.30476	0.228608	1.13689e-09	6.19607e-08
PDE7A	16.0169	-1.06232	0.193482	3.55343e-09	1.83469e-07
ANKRD36B	11.9425	-1.26682	0.231595	4.07511e-09	1.99884e-07
IGFBP5	9.43729	-1.5901	0.291301	4.36958e-09	2.00617e-07
SMIM17	13.3903	-1.19743	0.219657	4.49906e-09	2.00617e-07
MEPCE	13.3009	-1.14649	0.213402	7.16036e-09	3.05405e-07
RUVBL2	8.66156	-1.43895	0.270946	1.12952e-08	4.6169e-07
APOBEC3A_B	19.305	-1.04654	0.200438	1.43304e-08	5.62324e-07
ZNF723	9.12935	-1.32472	0.253058	1.69889e-08	6.41004e-07
AAMP	12.0462	-1.12756	0.217539	2.0731e-08	7.53227e-07
LENG1	24.6123	-0.903858	0.178551	3.53117e-08	1.23717e-06
TMEM106C	26.6109	-1.11667	0.226079	4.75884e-08	1.6098e-06
XRCC2	19.36	-0.907991	0.184079	7.23503e-08	2.29913e-06
IFITM2	8.18906	-1.34904	0.272311	7.26533e-08	2.29913e-06
ZFP37	7.67641	-1.34789	0.272541	8.10521e-08	2.48475e-06
IL24	17.5484	-0.986029	0.203605	1.01342e-07	3.01262e-06
ELK1	8.71752	-1.17664	0.247119	1.9554e-07	5.64192e-06
CCDC88B	9.92789	-1.11946	0.239763	2.77899e-07	7.78912e-06
HSP90AB1	8.80273	-1.15404	0.247472	3.10425e-07	8.45907e-06
RASL10A	6.26309	-1.55507	0.334925	3.602e-07	9.55017e-06
ZNF540	10.0473	-1.02815	0.225135	4.85484e-07	1.25332e-05
DDX17	16.0956	-0.900593	0.199002	5.30619e-07	1.33471e-05
TMEM50B	7.31614	-1.30067	0.289766	6.83378e-07	1.67598e-05
EIF3A	12.5577	-0.870109	0.198081	1.11859e-06	2.67643e-05
ZNF680	5.22732	-1.54142	0.35071	1.25564e-06	2.93282e-05
DAOA	6.29931	-1.38375	0.319097	1.39782e-06	3.18899e-05
ACTN2	13.6087	-0.923458	0.21434	1.44156e-06	3.21402e-05
COL5A1	15.3533	-0.919591	0.214761	1.50334e-06	3.27729e-05
ZNF493	6.93285	-1.24866	0.290929	1.70741e-06	3.64124e-05
ACTC1	54.8065	-0.838819	0.204694	2.78318e-06	5.70104e-05
GNA15	7.92671	-1.29266	0.31357	2.7895e-06	5.70104e-05
PEG10	9.5036	-1.07301	0.268476	5.13396e-06	0.000102784
ZNF106	8.49582	-1.10804	0.277752	5.36236e-06	0.00010521
ITPRID2	10.9287	-0.848667	0.211011	5.70221e-06	0.000109684
LENG8	8.30535	-0.979231	0.249386	8.13248e-06	0.000153422
KRT28	6.91992	-1.1551	0.297639	8.98411e-06	0.000166291
EBI3	7.12215	0.958812	0.25604	1.04367e-05	0.000189601
STBD1	15.1111	-0.733407	0.189822	1.13132e-05	0.000201786
OLFML3	5.65833	-1.31395	0.347247	1.3227e-05	0.000231709
PRELID3B	8.38269	-0.909202	0.239015	1.39337e-05	0.000239807
TTN	16.7098	-0.797534	0.214724	1.69525e-05	0.00028673
TMEM213	6.39976	-1.06859	0.287198	1.88893e-05	0.000314074
TNFAIP8	14.0314	-0.806178	0.222049	2.39595e-05	0.000391737
UBE2Z	13.8936	-0.729172	0.199933	2.63349e-05	0.000423518
TNC	9.09421	-0.913595	0.253749	2.72449e-05	0.000431084
SPARCL1	6.9465	-1.15812	0.32522	2.77462e-05	0.000432048
RAD23B	10.3051	-0.787939	0.216981	2.82434e-05	0.000432918
KRT19	1.82553	1.55453	0.466943	3.30608e-05
SULT1C4	6.47412	-1.01346	0.286569	3.6611e-05	0.000552544
NCK1	6.48894	-1.03388	0.293697	3.74892e-05	0.00055339
COL3A1	37.1015	-0.60334	0.169089	3.77952e-05	0.00055339
MAZ	11.4151	-0.843317	0.242852	4.20732e-05	0.0006033
DUX5	27.0016	-0.579884	0.162409	4.2434e-05	0.0006033
TUSC2	21.494	-0.57778	0.161779	4.38103e-05	0.000611027
ANKRD36	6.42773	-0.996907	0.285843	4.42231e-05	0.000611027
HNRNPCL3	5.73951	-1.09188	0.314747	4.5841e-05	0.000624318
MZT2B	7.89525	0.789373	0.232709	4.69902e-05	0.000624318
NES	5.43376	-1.14955	0.332698	4.70944e-05	0.000624318
ZNF417	6.31753	-1.00029	0.289379	4.96104e-05	0.000648904
SIGMAR1	6.09775	-1.0453	0.304199	5.12933e-05	0.000654515
DDX50	4.64244	-1.21281	0.350306	5.13738e-05	0.000654515
COL6A1	17.9849	-0.73983	0.218081	5.65588e-05	0.000711336
ARRDC1	7.28825	-0.934155	0.274052	5.74815e-05	0.000713789
TESC	11.5534	-0.709336	0.205887	5.94627e-05	0.000729162
LAMB1	5.41331	-1.13024	0.335995	6.46942e-05	0.000783519
RDH13	5.87759	-0.993024	0.2935	6.67509e-05	0.000798568
PAGE5	10.6161	-0.925835	0.281575	6.94194e-05	0.000820487
KRAS	6.04797	-1.10586	0.333788	7.16698e-05	0.000837001
RNF167	5.57496	-1.05093	0.314502	7.39766e-05	0.000853777
PHAX	9.70969	-0.782374	0.233756	7.57052e-05	0.000863567
COL4A1	10.7643	-0.843771	0.256483	7.95796e-05	0.000897328
NPIPB6	5.66425	-1.04138	0.316492	8.55691e-05	0.000950577
CCDC86	5.75327	-1.22483	0.380404	8.62399e-05	0.000950577
EPC1	6.75914	-0.917075	0.279416	9.11712e-05	0.000993766
TTYH3	6.68595	-0.93789	0.289991	0.000103604	0.00111688
HNRNPA2B1	10.3642	-0.717935	0.219536	0.000108768	0.00115979
MAGEA3	11.5023	-0.737318	0.230834	0.000126075	0.00131758
STIP1	4.31143	-1.15744	0.363153	0.000126443	0.00131758
INTS6L	4.72541	-1.11849	0.352037	0.000127594	0.00131758
NFAM1	5.43028	-0.988784	0.313128	0.000138614	0.00141646
THEM5	6.7285	-0.887535	0.285953	0.000163973	0.00165832
MYBPC2	7.66281	-0.820369	0.263605	0.000166541	0.00165998
TLE5	8.6066	-0.783238	0.251585	0.000167521	0.00165998
DDX4	5.01127	-1.58394	0.542194	0.000170044	0.00166814
HMGB1	7.17273	-0.814766	0.262584	0.00017946	0.00174307
ZNF714	5.78743	-0.944768	0.309565	0.000190808	0.00183513
LPAR2	5.78785	-0.94914	0.312904	0.000202469	0.00192837
ZFP36L1	4.9921	-0.987013	0.331421	0.000246535	0.00230898
NCL	4.49622	-1.04741	0.351871	0.000247139	0.00230898
BANK1	4.31559	-1.05583	0.35647	0.000263685	0.00244033
OLFML2A	5.53226	-0.901445	0.305292	0.000276098	0.00250391
JPH4	8.25962	-0.740137	0.248685	0.000276582	0.00250391
FABP1	10.2845	-0.721873	0.244531	0.000278213	0.00250391
FAM3C	7.10793	-0.791546	0.272795	0.000328754	0.00289331
CCND2	8.86401	-0.750094	0.259112	0.000328924	0.00289331
H4C1	11.1204	-0.687581	0.235975	0.000330327	0.00289331
MAPKBP1	5.0043	-0.963497	0.33905	0.000362224	0.00314462
CCDC47	9.71971	-0.733742	0.259083	0.000384619	0.00330975
PTP4A3	5.89027	-0.807761	0.283494	0.00041316	0.00350073
HNRNPH3	4.48782	-0.986012	0.351191	0.0004165	0.00350073
BIRC5	8.39457	-0.729506	0.257974	0.000417518	0.00350073
FN1	8.01621	-0.850815	0.311799	0.000442201	0.00367626
PXDN	6.71988	-0.868121	0.315926	0.000448342	0.00368786
NBPF14	6.37054	-0.794798	0.283499	0.000451114	0.00368786
TASOR2	8.67684	-0.678904	0.243385	0.00051574	0.00418133
KCNH3	4.8271	-0.893135	0.331323	0.000584617	0.00468451
GOLGA8A	8.17285	-0.784299	0.294615	0.000587355	0.00468451
TRIM51	4.84056	-0.885599	0.334017	0.000671087	0.00530917
TUBB4B	4.98146	-0.848652	0.322009	0.000718224	0.00563662
CRIP1	1.86771	0.102318	0.207845	0.000740757
IFI6	3.97195	-0.951825	0.366355	0.000779761	0.006071
ATP2A2	10.4264	-0.612512	0.231676	0.000845799	0.0065333
MYBPC1	6.57569	-0.763947	0.298281	0.000856783	0.00656644
RPRD1B	7.66338	-0.644285	0.245103	0.000900272	0.00684626
CAPN6	3.59694	-0.996468	0.39297	0.000924989	0.00698011
TOMM34	5.38971	-0.78555	0.309079	0.000954026	0.00714427
HNRNPL	3.90138	-0.899063	0.361028	0.00109128	0.0080658
GAL3ST2	8.66159	-0.602008	0.233408	0.00109353	0.0080658
NPIPA1	6.06176	-0.749804	0.304043	0.00114283	0.00836652
ZNF625	5.65514	-0.754444	0.306292	0.00118303	0.0085967
MALRD1	5.33423	-0.762177	0.310926	0.00123081	0.00887809
PLEC	9.3756	-0.593186	0.237485	0.00132277	0.00947184
TTC31	4.3052	0.673621	0.295463	0.00134919	0.00959099
ZHX3	4.52374	-0.862435	0.36943	0.00144275	0.0101823
RGMA	3.65744	-0.913811	0.388943	0.00149674	0.0104408
IGHG4	5.40133	-0.739082	0.309834	0.00150066	0.0104408
SLFNL1	4.60615	-0.77819	0.329092	0.00154645	0.0106836
NBPF12	5.32215	-0.734633	0.310951	0.00159374	0.0108807
FCF1	4.84619	-0.76594	0.325739	0.00159717	0.0108807
ZNF586	3.85005	-0.881962	0.38087	0.00163371	0.0110529
MICALL2	24.2893	0.529904	0.219964	0.00180917	0.0121561
CDKN2D	4.75071	-0.759407	0.330052	0.0018216	0.0121564
CYP2A6	4.65918	-0.792335	0.353122	0.00191892	0.0127193
FIZ1	5.6301	-0.700157	0.306477	0.00194777	0.0128239
ZNF350	3.66386	-0.843705	0.375116	0.00201556	0.0131745
ACSF2	8.72417	-0.545942	0.228327	0.00202787	0.0131745
COL4A2	7.07236	-0.619526	0.271074	0.0021799	0.014069
NEGR1	3.73653	-0.854442	0.396157	0.00229146	0.0146923
TFG	3.65306	-0.827996	0.383592	0.00244111	0.0155502
PLK3	1.58435	0.888746	0.511668	0.00246912
QKI	5.84694	-0.635028	0.290484	0.00274049	0.0173446
SPTBN1	4.08844	-0.773667	0.370801	0.00285491	0.017953
APP	6.0944	-0.62027	0.287276	0.00298403	0.0186454
TMSB4X	4.04918	0.600653	0.304762	0.00316401	0.0196449
LAMC1	6.00738	-0.609796	0.286435	0.00325763	0.0200851
CAPN15	2.99432	-0.889671	0.441719	0.00327585	0.0200851
MAGED2	5.14612	-0.654471	0.315719	0.00341405	0.0206805
NBPF19	3.9514	-0.736491	0.362083	0.00341512	0.0206805
STOX2	3.34392	-0.80957	0.404115	0.00349119	0.0210114
H3C2	2.18123	-0.0730709	0.189437	0.00365163
THBS4	7.12895	-0.722425	0.39512	0.00371845	0.0222427
CBX5	4.16301	-0.697611	0.347479	0.003782	0.0224857
KDM4B	2.97131	0.682385	0.396067	0.00393971	0.0232823
GATA2	3.60479	-0.750269	0.386947	0.00412315	0.0242204
LDHB	5.52069	-0.616785	0.308234	0.00416003	0.0242916
VAMP8	6.25487	-0.596098	0.298381	0.00418538	0.024295
HNRNPU	5.54993	-0.595938	0.298799	0.00443826	0.0254207
ADCY6	3.36606	-0.759019	0.400556	0.00443893	0.0254207
CTNNB1	4.58741	-0.772451	0.441716	0.00445704	0.0254207
BCL2L2	5.74326	-0.579856	0.294376	0.00483951	0.0274269
TRIM17	7.12331	-0.524158	0.257744	0.0048647	0.0274269
ZFP1	4.21629	-0.661366	0.350735	0.00500692	0.0280674
EIF4A2	3.73148	-0.690358	0.374741	0.00526513	0.0293471
ZNF391	7.57334	-0.514643	0.25815	0.00530846	0.0294214
TPM1	10.0511	-0.44554	0.212288	0.00543356	0.0299456
PRRT2	4.92007	-0.607441	0.324526	0.00552435	0.0301729
SMAD7	4.70741	-0.63798	0.3488	0.00553632	0.0301729
PRDM5	3.94186	-0.649079	0.353391	0.0057226	0.0310158
TCAP	4.16129	0.547143	0.317092	0.00590111	0.0316401
MYH9	5.26178	-0.570793	0.303267	0.00590228	0.0316401
TRIM45	3.26238	-0.752034	0.455829	0.00635043	0.0338574
APOO	4.46702	-0.607769	0.336959	0.00639992	0.0339369
SYNCRIP	3.07213	-0.72349	0.424238	0.00659094	0.0347619
MYL4	7.98705	-0.511101	0.277421	0.00683081	0.0358343
CHRNA1	4.48035	-0.588632	0.332796	0.00699219	0.0364574
RNF113A	5.16663	-0.554295	0.305002	0.0070253	0.0364574
TNNC2	13.6568	-0.458609	0.241753	0.00706106	0.0364574
C1QL2	3.41845	-1.62589	0.411323	0.00712445	0.0365921
CFDP1	6.58299	-0.505554	0.271874	0.00717135	0.0366411
CARD11	4.3895	-0.629979	0.383837	0.00733855	0.0373011
ZNF528	3.16745	-0.685501	0.413153	0.00743544	0.0375667
WNT9A	3.04114	-0.704751	0.433967	0.00750598	0.0375667
KCNAB3	4.1454	-0.621736	0.372375	0.00750924	0.0375667
DUX4	14.6986	-0.366568	0.174275	0.0075718	0.0375667
COL5A2	4.83478	-0.565195	0.32401	0.0075948	0.0375667
MYH8	4.23714	-0.657765	0.42513	0.00762056	0.0375667
MEGF10	3.71671	-0.609859	0.360857	0.00797354	0.0391102
H4C12	2.67197	0.578441	0.419053	0.00813192	0.0395914
SULT1A4	3.31147	-0.662173	0.414044	0.00818064	0.0395914
BASP1	7.93306	-0.459383	0.245854	0.00819271	0.0395914
ZNF208	4.24966	-0.590129	0.355223	0.00824056	0.0396274
RAB39A	3.45346	-0.644047	0.400741	0.00830792	0.0396402
ERF	5.66339	-0.517517	0.293647	0.00832405	0.0396402
EVL	5.84775	-0.507362	0.286202	0.00846792	0.0400768
STK25	4.16495	-0.594587	0.365015	0.00849743	0.0400768
LAMB2	3.66695	-0.709222	0.530117	0.00855493	0.040155
H4C15	2.63751	0.588713	0.459861	0.00899665
RTL1	3.59531	-0.6447	0.428319	0.00899866	0.0420366
ZNF684	4.74889	-0.531604	0.313743	0.00931427	0.0433048
SPATS2L	4.38628	-0.553974	0.343947	0.00983421	0.0455064
FXYD7	1.61188	0.577656	0.609502	0.00990892
AEBP1	4.13447	-0.558778	0.351182	0.0101499	0.0467466
MPZL1	3.41352	-0.610433	0.407037	0.010237	0.0469277
MSLN	1.3399	0.564661	0.739907	0.0105363
LSP1	1.85235	0.562739	0.534379	0.0105474
PLEKHA4	5.06014	-0.505811	0.312584	0.0110086	0.0500502
NYAP1	4.35748	-0.559781	0.379363	0.0110301	0.0500502
RGS7BP	2.94829	-0.633656	0.449171	0.0110712	0.0500502
PDE4D	3.37002	-0.608143	0.432541	0.0112825	0.0507711
LAMA2	4.14643	-0.544324	0.359565	0.0114447	0.0511319
CALU	3.47411	-0.579003	0.393188	0.0114798	0.0511319
NFE2L1	4.24977	-0.531414	0.343904	0.011519	0.0511319
CCDC8	5.42354	-0.486094	0.300972	0.0116397	0.0512213
HNRNPA1	10.6176	-0.381446	0.205002	0.0116477	0.0512213
MAGED1	4.77813	-0.507238	0.323141	0.0117121	0.0512213
TSPYL2	3.09725	-0.612834	0.430952	0.011748	0.0512213
RGS18	5.62036	-0.465508	0.28133	0.0120628	0.0523458
HNRNPK	3.26674	-0.575674	0.396211	0.0121126	0.0523458
PIGR	1.61724	0.039307	0.193273	0.0121505
FUS	6.53637	-0.44583	0.267346	0.0124038	0.053369
SBK1	1.59663	0.513677	0.620461	0.0124329
PODXL	1.44543	0.502754	0.685064	0.0124515
PRRC2B	5.26725	-0.479156	0.300921	0.0124877	0.0534955
MYL1	19.1755	-0.379371	0.21344	0.012599	0.0537365
NOTCH2NLA	3.61509	-0.548423	0.377486	0.012711	0.0537365
ADPRS	6.02708	-0.450868	0.273735	0.0127573	0.0537365
FAM20C	3.54695	-0.600159	0.80792	0.0127631	0.0537365
ANXA1	1.59923	0.0626435	0.199002	0.0129398
HNRNPDL	5.2089	-0.471677	0.297936	0.0131007	0.0548349
C16orf78	4.77782	-0.501272	0.339955	0.0132481	0.0548349
SEPTIN11	3.82286	-0.528096	0.362485	0.0132962	0.0548349
SF3B3	2.93267	-0.605586	0.471492	0.0133014	0.0548349
TM7SF3	3.67719	-0.538722	0.380329	0.0133542	0.0548349
C12orf57	6.05724	-0.478425	0.322113	0.0133607	0.0548349
ZNF146	2.67379	-0.612172	0.463869	0.0134153	0.0548349
FBXO32	1.84556	0.499116	0.585746	0.0135624
ILF3	4.96236	-0.487642	0.326461	0.0135777	0.0551419
ITM2A	3.58076	-0.540878	0.385303	0.0136496	0.0551419
SSRP1	4.13189	-0.514678	0.351901	0.013659	0.0551419
MYOM1	3.41031	-0.562652	0.430755	0.0137702	0.0551998
COL6A3	5.31646	-0.465166	0.298113	0.0137859	0.0551998
MATN2	5.89028	-0.477866	0.328317	0.0139092	0.0554671
PNN	5.13887	-0.467767	0.302929	0.0139955	0.0555853
CCDC189	2.89678	-0.577118	0.436526	0.0141481	0.0559647
MB	4.58849	0.422882	0.28815	0.014312	0.056317
MEGF8	5.63001	-0.465735	0.311476	0.0143519	0.056317
ZNF334	4.52828	-0.491319	0.340594	0.0145096	0.0567088
CLIC1	1.85376	0.472259	0.54243	0.0150258
NUP35	1.64083	0.450952	0.600936	0.0153469
H4C8	2.06028	0.467292	0.469987	0.0153843
SRSF1	5.71884	-0.434538	0.279413	0.0156825	0.0610496
CSDE1	4.03227	-0.494675	0.36474	0.0159776	0.0619528
HTRA3	1.41677	0.393845	0.656189	0.0160577
NREP	8.02692	-0.428487	0.291762	0.0163257	0.0630532
CHRND	3.92684	-0.493273	0.371264	0.0165782	0.0635379
ITM2B	4.69188	-0.460804	0.322438	0.016654	0.0635379
MACF1	4.58225	-0.470022	0.338944	0.0166715	0.0635379
MXD4	3.2735	-0.519516	0.406804	0.0167103	0.0635379
ATRX	4.86878	-0.453267	0.318465	0.0170438	0.064556
H2AC19	2.4759	0.447993	0.42591	0.0171097
RPL4	6.53834	-0.452643	0.343636	0.0173367	0.0654127
GIT2	3.52629	-0.499456	0.388437	0.0174526	0.0655978
SAAL1	3.12504	-0.521043	0.439867	0.0175273	0.0656207
ZNF574	4.77595	-0.462459	0.344975	0.0175925	0.0656207
SYNGR3	1.40334	0.37358	0.60946	0.0176081
OCIAD1	3.0146	-0.521973	0.431459	0.0176856	0.0657182
ECHDC2	2.62209	-0.546396	0.463057	0.0177959
ITGBL1	1.75463	0.416805	0.550795	0.0179189
YBX3	2.88541	0.427048	0.370569	0.0179722	0.0665312
CNN3	3.82883	-0.477507	0.363834	0.0180701	0.0666418
HNRNPR	3.79219	-0.476882	0.364201	0.0181851	0.0668149
LRRN4	1.64231	0.40743	0.554948	0.0182776
POU5F1	3.64526	-0.492468	0.393209	0.0183108	0.0670256
SRSF9	4.09503	-0.458464	0.337232	0.0186222	0.0679122
POSTN	3.37673	-0.499623	0.438665	0.0187802	0.0682346
EOMES	4.13118	-0.457303	0.337023	0.018966	0.0686555
SARNP	1.54098	0.38501	0.563892	0.0191311
RAD21	3.54113	-0.479871	0.382458	0.0192488	0.0694231
CST3	2.0171	2.30443	0.280689	0.0193365
HSP90AA1	3.2317	-0.488651	0.589428	0.0193797	0.0696391
NSD2	3.32548	-0.487853	0.409653	0.0196382	0.0703105
ZBTB7B	3.43973	-0.474772	0.381688	0.0198363	0.0707613
GTF2I	3.94675	-0.452076	0.344686	0.0201055	0.071462
CD27	3.89012	-0.461554	0.375888	0.0203698	0.0721401
CNR1	2.81505	-0.50102	0.487948	0.0206167	0.0725061
HNRNPD	3.96159	-0.455509	0.366613	0.020621	0.0725061
BMERB1	3.01883	-0.487768	0.418232	0.0207311	0.072593
CKM	6.12817	-0.401163	0.280296	0.0208639	0.072593
EMX1	4.61643	-0.430319	0.320806	0.0208677	0.072593
CHD4	4.9743	-0.43227	0.341878	0.0212508	0.0736643
SKI	3.53164	-0.453793	0.360148	0.0214371	0.0738494
NUMA1	3.63026	-0.453177	0.362091	0.0215007	0.0738494
SETD7	4.43548	-0.429145	0.328113	0.02153	0.0738494
RNF168	1.47385	0.343248	0.519623	0.0217813
CDK6	3.4289	-0.457393	0.388492	0.0220095	0.075231
YME1L1	3.4549	-0.457079	0.378829	0.0221627	0.0754917
HP1BP3	3.18352	-0.460567	0.387256	0.0224628	0.0762491
PRKACA	4.65776	-0.410582	0.299164	0.0225552	0.0762988
GNG5	1.3298	0.300011	0.484463	0.0226646
ANXA2	3.0358	0.397078	0.378053	0.0228048	0.0766778
HMGN1	3.96848	-0.43263	0.343375	0.0228236	0.0766778
ZNF799	3.29777	-0.455781	0.407711	0.022934	0.0767858
CTDSP2	2.78722	-0.472062	0.437804	0.0230488	0.0769076
RPS19	3.22544	0.396205	0.377441	0.0232476	0.0773082
KDELR2	1.66986	0.34818	0.497168	0.0233237
CD82	3.76672	-0.431903	0.349236	0.0235003	0.0778844
ACTA2	6.83143	-0.373416	0.267891	0.0247607	0.0817855
KLF6	1.80211	0.355595	0.467278	0.0247889
RPS6KB1	4.45477	-0.401617	0.30428	0.0249901	0.0822661
LBP	1.47669	0.293744	0.460194	0.0252318
TAGLN3	2.24508	0.371141	0.40915	0.0252969
FAM3A	2.74215	-0.452415	0.458328	0.0253731	0.0832474
MYLPF	13.9182	-0.338644	0.227602	0.0254929	0.0833618
ZNF470	6.12008	-0.370785	0.263844	0.0256396	0.0834752
CLTB	4.62604	-0.400563	0.317712	0.0256978	0.0834752
BTBD6	3.7736	-0.415458	0.345357	0.0258989	0.0838509
OSBPL2	3.15098	-0.433089	0.402517	0.0260502	0.0840633
LMO7	1.56719	0.317585	0.46818	0.026097
SOD2	1.9078	0.34576	0.457747	0.0262146
COL1A2	111.625	-0.269316	0.155828	0.0263966	0.0849018
UFM1	2.5802	-0.442906	0.477627	0.0265614
LRRFIP2	3.57072	-0.420731	0.376576	0.0266062	0.0851202
SRRM2	5.68916	-0.366145	0.25925	0.026638	0.0851202
CDR2	2.84052	-0.435387	0.429588	0.027075	0.0860194
EBF1	4.31332	-0.397588	0.318469	0.0270948	0.0860194
FADS3	2.3124	0.361113	0.398452	0.027293
TPPP3	4.34623	0.36019	0.297291	0.0273357	0.0863928
DLK1	12.2818	-0.340046	0.238206	0.0273885	0.0863928
DDX39B	3.71904	-0.408857	0.405034	0.0277961	0.0873973
FAM117A	1.94303	0.33891	0.435408	0.0280337
SDCBP	2.85252	-0.42445	0.420711	0.0280812	0.0880115
SNX2	1.61046	0.297218	0.437369	0.0281211
DIPK2A	1.42078	0.285829	0.436424	0.0282738
SIGLEC16	4.84672	-0.377873	0.294493	0.0286926	0.0896416
CCDC17	1.52265	0.294616	0.439004	0.0287035
LUM	1.45395	0.2861	0.434002	0.0294248
KCNK9	1.74695	0.292425	0.431131	0.0295241
SETD5	3.24542	-0.404937	0.388568	0.0299406	0.0932437
MYBPH	7.93344	-0.346294	0.257839	0.0301914	0.0937271
CYP4X1	1.64685	0.293991	0.427416	0.030415
TMEM170A	2.75339	-0.409843	0.422896	0.030482	0.0943308
TSPAN9	3.09507	-0.397943	0.380482	0.0313633	0.0967527
EIF4G2	5.62372	-0.353001	0.26927	0.0315345	0.0969761
ADAM19	2.82161	-0.395181	0.432659	0.0318487	0.0975611
SLC38A2	4.03702	-0.377416	0.32478	0.0319487	0.0975611
HDLBP	3.30853	-0.390426	0.378949	0.0320231	0.0975611
PRSS23	1.43249	0.269576	0.407899	0.0320426
PARM1	4.4252	-0.374656	0.338977	0.0321661	0.0976933
CSTF3	3.69369	-0.380165	0.345178	0.0328706	0.0995248
CYCS	3.84714	-0.374282	0.323672	0.0330847	0.0995934
KLRC2	2.95792	-0.387517	0.408683	0.0330963	0.0995934
RPS25	1.98031	0.311086	0.408241	0.0335257
S100A11	2.13877	0.31919	0.401161	0.0346786
BIN1	4.56687	-0.357782	0.31311	0.034956	0.104864
WDR1	1.34096	0.247843	0.381255	0.0350188
RPS2	2.74263	0.334552	0.346969	0.0350614	0.104864
SPTAN1	4.40371	-0.358686	0.316958	0.035229	0.105045
MYH7	4.90558	-0.351754	0.303895	0.0355484	0.105676
NDUFV2	2.95096	-0.376441	0.376335	0.0356675	0.105709
RPS12	7.59866	0.292666	0.207246	0.0357894	0.105751
NBPF15	7.15704	-0.321099	0.236924	0.0360421	0.106178
VCAN	3.06122	-0.371069	0.379834	0.0363516	0.106769
MRPL41	1.19274	0.222688	0.355524	0.03639
ZNF454	2.87308	-0.3685	0.393446	0.0368236	0.107833
VASH2	3.8649	-0.298161	0.419252	0.0372104	0.108641
SPG7	3.18	-0.360803	0.364255	0.038334	0.111589
PLIN5	2.62446	-0.363532	0.401715	0.0385667
TIE1	1.29084	0.225847	0.354621	0.0387772
NTN4	2.67085	-0.35187	0.406685	0.0391912	0.113506
SNRNP200	3.06559	-0.356574	0.364653	0.0392237	0.113506
SEPTIN5	3.73261	-0.350623	0.332652	0.0394073	0.113702
C10orf71	1.34654	0.23671	0.361982	0.039674
MED19	3.23115	-0.352159	0.356397	0.0397972	0.11449
MAP3K14	1.61565	0.258814	0.373187	0.0399142
ANXA6	4.3614	-0.339035	0.293666	0.0400004	0.114738
CCT5	2.71839	-0.353293	0.389282	0.0402829	0.115211
KLF10	1.74681	0.273178	0.376264	0.0402922
MEST	3.83859	-0.343325	0.329894	0.0405827	0.115731
RPL38	5.36488	0.303766	0.255139	0.0409617	0.116163
CALR	3.9764	-0.34028	0.310034	0.0409707	0.116163
TPM2	15.5698	-0.293572	0.219159	0.041137	0.116298
MEOX2	1.44403	0.239483	0.360816	0.0412676
CES2	1.50019	0.235921	0.357498	0.0415554
SERPINE1	1.4415	0.237906	0.358633	0.041812
COMT	1.53298	0.24622	0.36324	0.0418452
SACS	3.38834	-0.342583	0.347149	0.0418839	0.118069
INKA2	1.61189	0.252578	0.363105	0.0421606
EFCAB5	1.52925	0.247296	0.361818	0.0425276
ZNF260	2.73092	-0.339925	0.378171	0.0433315	0.1218
EMC10	3.10763	-0.335939	0.360629	0.0434698	0.12184
ZBTB45	1.65087	0.258219	0.36295	0.0436333
H3-3A	3.18676	-0.329268	0.368517	0.0436636	0.122034
CXCL14	1.51947	0.238428	0.354955	0.0438647
ELN	4.42543	-0.326574	0.292526	0.0439097	0.122258
H2BS1	2.97632	0.297991	0.317651	0.0439928	0.122258
THOP1	1.5613	0.236604	0.351554	0.0448485
MIDEAS	2.97658	-0.333653	0.357491	0.044959	0.124427
ATP2B4	3.96544	-0.327006	0.314292	0.0450271	0.124427
AMACR	2.8015	-0.259048	0.379983	0.0460543	0.126908
FRMD7	1.87513	0.260529	0.354575	0.0461538
DRAP1	1.55925	0.232869	0.346961	0.0461898
EIF6	1.53945	-0.142603	0.229728	0.0462217
HRC	2.9907	-0.327474	0.35587	0.0463724	0.127427
PRKDC	3.09521	-0.328187	0.338483	0.0465113	0.127451
ZNF548	2.81587	-0.323575	0.365727	0.0468721	0.127846
ZNF346	3.65529	-0.319499	0.334999	0.0469161	0.127846
ZMIZ2	2.67703	-0.321708	0.372618	0.0471529	0.128136
WFS1	1.49695	0.223647	0.33863	0.0476733
PCSK6	3.07967	-0.31222	0.367871	0.0476744	0.129195
TXNRD1	1.49323	0.233466	0.344533	0.0479588
RGS16	2.92126	-0.260696	0.375127	0.0479992	0.129279
JPT1	3.42451	-0.31934	0.334537	0.048033	0.129279
TUBB	3.06502	-0.321071	0.347007	0.0481154	0.129279
GIGYF1	1.74801	0.242758	0.34604	0.0482223
CASP2	3.53175	-0.319951	0.319375	0.0482327	0.129279
CCDC110	3.32739	-0.319402	0.32948	0.0484756	0.129576
KRT8	2.26653	0.26027	0.35204	0.0485681
MORF4L1	5.5741	-0.296615	0.336302	0.0489633	0.130525
PTPRS	2.64526	-0.317562	0.361224	0.0492533
MICAL1	3.38723	-0.313444	0.341239	0.0494216	0.131389
PCBP2	3.78788	-0.312937	0.31017	0.0498851	0.132263
RPL22	3.42352	-0.3096	0.329986	0.0506404	0.133904
POTEG	3.49858	-0.307958	0.330887	0.0509853	0.134453
MAPT	1.61444	-0.0728172	0.198603	0.0516427
ACTA1	19.8243	0.253507	0.18177	0.05263	0.138418
MAP3K6	1.84494	0.242379	0.335457	0.05266
PRMT6	1.9582	0.251081	0.333728	0.0533587
CFAP410	3.32448	-0.296403	0.34063	0.0535442	0.140446
SNAPC2	1.61588	0.228355	0.332239	0.0537272
MIB1	2.62484	-0.283537	0.363536	0.053793
WSB1	2.91846	-0.298879	0.343379	0.0538651	0.140911
TEAD2	3.07792	-0.259045	0.357477	0.0541364	0.141218
NCBP2	3.01932	-0.302721	0.332959	0.0542705	0.141218
GLOD4	1.63167	0.229336	0.330284	0.0548375
THRAP3	3.23123	-0.29685	0.325804	0.0554713	0.143626
TDGF1	3.00244	-0.300702	0.324944	0.0556027	0.143626
RPS3A	8.76881	-0.264419	0.202113	0.055635	0.143626
PATE2	2.29213	0.253002	0.32539	0.0558074
ABCB7	1.85696	0.229925	0.32845	0.0558782
MYRF	1.2912	0.197822	0.31241	0.0562662
CD248	1.24365	0.18812	0.305896	0.0564145
PCM1	2.90226	-0.295326	0.333432	0.0565085	0.145151
EIF4EBP2	2.87676	-0.294374	0.338047	0.0565215	0.145151
ACTN3	3.66628	-0.291779	0.315942	0.0566745	0.145164
ZNF500	4.02437	-0.294153	0.281567	0.0570253	0.145682
MSL1	3.42086	-0.295351	0.307794	0.0574286	0.145977
RPLP2	3.03066	-0.0182421	0.174817	0.0574386	0.145977
GGTLC1	5.32476	-0.284617	0.254642	0.0579933	0.146674
ZNF354C	3.29191	-0.292802	0.31597	0.0580119	0.146674
DPYSL3	2.54229	-0.282128	0.348959	0.0582955
HLA-DQB2	3.56706	-0.291855	0.303264	0.0582964	0.147015
RPS7	1.79442	0.227163	0.318376	0.0583531
NEB	11.1221	-0.258073	0.199395	0.0587657	0.147394
RPL19	6.01787	0.272405	0.250699	0.0588862	0.147394
CD34	3.03521	-0.271679	0.341401	0.0588976	0.147394
C16orf87	1.7125	0.219805	0.320305	0.0589028
CACNA1I	1.2123	0.186931	0.303414	0.0590467
EHBP1L1	2.94295	-0.281526	0.334331	0.0592017	0.147778
EMILIN2	1.66272	0.217595	0.31959	0.0592308
TECPR1	1.54813	0.21331	0.31729	0.0594716
STAU2	1.56075	0.213357	0.317293	0.0595131
SEC31A	3.23756	-0.283359	0.32366	0.0597454	0.148757
DVL2	1.90956	0.236471	0.322055	0.0598745
PSORS1C1	1.32385	0.192497	0.306064	0.0599304
TCAF1	2.5353	-0.280286	0.34324	0.0599327
IQCN	1.92443	0.22863	0.316501	0.0603938
GNRH2	1.26937	0.181422	0.298205	0.0610732
ZFYVE19	1.39635	0.196603	0.307582	0.0610907
UPK3BL1	3.7147	-0.283981	0.300625	0.0611375	0.151838
HSPB3	1.7972	0.221744	0.310797	0.062081
SCYL1	1.4814	0.203289	0.310052	0.0622739
CRYBB3	1.40033	0.195252	0.305701	0.0622793
SGCD	3.1395	-0.282475	0.309589	0.0630441	0.15561
NFKB2	3.70671	-0.257497	0.327257	0.0630704	0.15561
HSPB6	1.71956	0.209374	0.311441	0.0631133
DAG1	3.79914	-0.280942	0.290452	0.0632175	0.15561
POLR2J	2.76425	-0.277402	0.325412	0.063291	0.15561
HNRNPUL1	2.67615	-0.273582	0.327976	0.0636549	0.156114
TCF12	2.61159	-0.27324	0.330827	0.0636902
RHOQ	2.93182	-0.278041	0.319274	0.0638517	0.156174
PCDH11X	2.42329	-0.264262	0.338988	0.0638603
HLA-A	1.30048	0.182452	0.297193	0.0640518
STRBP	2.86523	-0.27335	0.32268	0.0640987	0.156174
ATAD3A	4.73809	-0.275666	0.271157	0.0641571	0.156174
TRAK1	3.34401	-0.277639	0.301507	0.064505	0.156417
ACAA1	3.75953	-0.278951	0.287346	0.0645758	0.156417
SP7	6.0333	-0.269553	0.284607	0.0648982	0.156798
SLC25A6	2.93504	-0.275378	0.313891	0.0650527	0.156798
PLAGL1	5.89487	-0.267955	0.24394	0.0658137	0.158243
ITIH4	1.61674	0.200866	0.305241	0.0658399
ART1	2.70115	-0.272166	0.320087	0.0660201	0.158351
TMSB10	5.277	0.255713	0.240768	0.0664296	0.15856
DCN	5.41571	-0.269253	0.261564	0.0664305	0.15856
WEE1	1.76091	0.215509	0.311044	0.0673957
SPNS3	1.46564	0.195405	0.301741	0.0674337
S100A6	3.53353	0.250458	0.278585	0.0675743	0.160572
EWSR1	4.58855	-0.270325	0.270298	0.0676007	0.160572
MYH4	1.35143	0.182071	0.294443	0.0678218
FAAH2	1.53307	0.194413	0.300279	0.0683534
SDHC	2.35592	-0.25727	0.328472	0.0686317
SNRPB	1.51912	0.194293	0.299934	0.0686541
NCOA6	1.6864	0.202965	0.303033	0.0687559
NPC2	3.04473	-0.26752	0.303262	0.0691741	0.163605
DVL1	6.29842	-0.256723	0.218721	0.0694133	0.163605
ITGB1	4.46168	-0.266672	0.275753	0.0694845	0.163605
RBMXL1	3.34767	-0.227879	0.318243	0.0695445	0.163605
SLC35B1	1.45561	0.194748	0.299383	0.0698115
ZNF529	3.30953	-0.25797	0.308652	0.0699634	0.163997
LGALS1	4.11351	0.25235	0.266674	0.0700597	0.163997
KBTBD11	1.37784	0.188605	0.29664	0.0700637
CSNK1D	3.40573	-0.229147	0.317724	0.0702127	0.163997
NR1H2	3.87327	-0.267868	0.273745	0.0704682	0.164203
H2AJ	2.97272	-0.263743	0.304657	0.071049	0.164489
PABPC4	3.45636	-0.259645	0.300456	0.0711181	0.164489
CAPRIN1	3.2092	-0.262693	0.300676	0.0711527	0.164489
TEDC2	2.74805	-0.257757	0.313491	0.0712619	0.164489
HLA-B	1.76602	0.201845	0.300128	0.0714363
MYH10	2.57925	-0.251687	0.319056	0.0715222
CTNNA1	3.32419	-0.265105	0.291475	0.0715492	0.164765
LETM1	1.41572	0.185153	0.293577	0.071557
MED13	3.1336	-0.261255	0.300612	0.0719152	0.16522
ANO2	1.6332	0.194591	0.296012	0.0735183
ZNF43	1.66724	0.200941	0.297628	0.0736311
ARFGAP2	1.8696	0.206113	0.298402	0.0736944
S100A10	2.05548	0.214773	0.298309	0.0736974
CFAP99	1.34409	0.177088	0.288182	0.0737444
BAHD1	2.7738	-0.18297	0.295163	0.0738301	0.168396
H1-0	3.83337	-0.261323	0.275251	0.0739424	0.168396
COX6B1	3.22281	-0.25739	0.296352	0.0739504	0.168396
SNHG32	3.01994	-0.25823	0.297241	0.0742007	0.168396
VGLL3	2.87945	-0.257063	0.302006	0.0742144	0.168396
SLC4A2	1.84451	0.210526	0.301944	0.0742371
TLE4	1.57019	0.193163	0.294969	0.0742848
SOX4	3.62895	-0.252202	0.296505	0.0743277	0.168396
NONO	3.72877	-0.258648	0.281035	0.0747993	0.16855
CCDC14	3.18762	-0.255884	0.296265	0.0748176	0.16855
PSG11	2.73148	-0.250677	0.308433	0.074911	0.16855
MUC5AC	1.77389	0.199774	0.296161	0.075088
HSD17B3	1.71138	0.196723	0.294774	0.0751285
UNC45B	2.80873	-0.250945	0.305838	0.0752468	0.168918
CLCN7	1.59895	0.192299	0.293544	0.0754356
HCN4	1.8979	0.204571	0.295861	0.0755152
SNRNP70	3.94957	-0.257015	0.276048	0.0759262	0.170054
RPL27	4.2483	-0.256626	0.265246	0.0763935	0.170711
MLLT3	3.06005	-0.219385	0.307764	0.0770611	0.171811
MTCH2	2.74111	-0.242746	0.306954	0.0772485	0.171839
LATS1	1.62498	0.18682	0.290102	0.0774522
STK19	2.92751	-0.252622	0.295646	0.0775106	0.172031
LRTM2	1.65348	0.18929	0.290819	0.0775569
GOLGA4	2.47352	-0.242324	0.309704	0.0778558
SSX3	2.75235	-0.246399	0.302904	0.0780989	0.172946
AGT	1.33792	0.171972	0.283096	0.0781927
HOXB2	1.42843	0.178653	0.286228	0.0784937
TNFRSF10C	3.50301	-0.253187	0.280346	0.078574	0.173606
EDAR	2.77136	-0.247893	0.298702	0.0787542	0.173613
COQ8B	1.97101	0.206946	0.292432	0.0794237
MDH1	2.76415	-0.245098	0.298078	0.0799125	0.175772
PPP2R3B	2.36413	0.21757	0.287118	0.080423
PKM	4.08441	-0.250972	0.261089	0.0808371	0.177408
RCN1	3.8154	-0.251025	0.266533	0.0811394	0.177674
OTUD1	1.34828	0.170906	0.280782	0.081474
NVL	1.43907	-0.0690426	0.201388	0.0818805
DYNLRB2	1.74551	0.188758	0.28638	0.0829251
VAPA	2.93102	-0.166471	0.280467	0.0832226	0.180946
B2M	2.93912	0.221301	0.279376	0.0833311	0.180946
LNPEP	3.13092	-0.238634	0.290815	0.0834005	0.180946
HSP90B1	3.21074	-0.241127	0.286801	0.0834772	0.180946
TPCN1	1.81541	-0.00892398	0.188055	0.0835239
NOTCH2	3.57781	-0.242082	0.280737	0.0835561	0.180946
HELZ	1.39739	0.17579	0.281911	0.0838738
RTL8C	5.75786	-0.242094	0.246522	0.0842499	0.182047
SGCB	2.62959	-0.237874	0.294866	0.0842619
SIX1	1.8494	0.189936	0.285073	0.0846932
ARRB2	3.35329	-0.243636	0.276753	0.0847068	0.182429
PSMB7	2.79168	-0.229185	0.296964	0.0847988	0.182429
MAP2K3	1.67627	0.18837	0.284581	0.0850639
WNT10A	2.73737	-0.235495	0.293614	0.0852906	0.183086
NCOA1	3.8159	-0.231419	0.286282	0.0855354	0.18321
DSC3	1.34199	0.166638	0.27687	0.0856135
IFNA16	2.68744	-0.233212	0.293924	0.0858535	0.183276
ANKRD50	2.93331	-0.233908	0.290921	0.0859398	0.183276
CTDSP1	1.59105	0.183658	0.282827	0.0861509
IST1	2.42284	-0.221656	0.299805	0.0861809
MRC2	1.42223	0.172928	0.279323	0.0865231
TAF15	3.11665	-0.234049	0.286614	0.0866232	0.184333
RPL12	2.62031	0.216229	0.273532	0.0867454
NSMCE1	1.8044	0.189692	0.282897	0.0871825
CUX1	2.75721	-0.231783	0.290893	0.0873239	0.185422
TRAK2	1.58468	0.182503	0.28154	0.087505
PSMG3	5.25671	-0.239219	0.238682	0.0876283	0.185494
SLC39A3	2.87929	-0.236021	0.285109	0.0877361	0.185494
LMCD1	1.66175	0.185498	0.281935	0.0878234
SYNPO2L	2.72172	-0.232677	0.288294	0.0882706	0.186223
COX7A1	1.44157	0.170765	0.277199	0.0889276
CLEC11A	1.48149	0.176263	0.279113	0.089096
CSRNP2	2.5712	-0.221042	0.294898	0.0891269
ITPKB	1.71309	0.174647	0.277984	0.0893444
SRCAP	2.45081	-0.219258	0.294686	0.0896948
DDX27	1.70759	0.187414	0.281194	0.0897499
FZD4	2.97994	-0.226325	0.285877	0.0903955	0.190296
GRB7	1.6753	0.174963	0.277701	0.0903997
ZNF606	1.74117	0.180401	0.278712	0.0906347
CRAT	1.79166	0.187864	0.279805	0.0907153
RAB28	2.86216	-0.229911	0.28427	0.0910286	0.190943
AMOTL1	2.8752	-0.229081	0.28372	0.091092	0.190943
STAT6	1.51657	0.173898	0.276724	0.091802
CCS	2.41222	-0.213759	0.292231	0.0920185
SNW1	2.30793	-0.207783	0.292693	0.0922744
ZNF207	3.94926	-0.234304	0.256457	0.0928738	0.194263
UPF2	2.32416	-0.213274	0.292205	0.0930077
DNM2	3.51287	-0.232518	0.264432	0.0936127	0.195392
CCNL2	3.4005	-0.23151	0.268341	0.0938507	0.195472
INTS12	1.62672	0.173068	0.275474	0.0940799
GABARAPL2	1.83315	0.187335	0.277183	0.0943711
NPNT	2.79313	-0.226532	0.279596	0.094518	0.195881
STMN1	5.50364	-0.230338	0.242048	0.0947391	0.195881
SMYD1	3.3528	-0.228354	0.2705	0.0948199	0.195881
PTBP1	7.03884	-0.224623	0.205105	0.0948456	0.195881
H3C13	4.50265	0.22109	0.245923	0.095609	0.196896
MCAM	2.9799	-0.226574	0.275141	0.0957383	0.196896
NAT8L	1.48284	0.164891	0.271581	0.0960259
CCDC179	2.57671	-0.218834	0.284642	0.0962264
ZNF544	1.8808	0.184129	0.275407	0.0962593
COL13A1	3.26815	-0.227595	0.26917	0.0963585	0.197757
FLYWCH2	2.50391	-0.218615	0.2841	0.0967327
SDR39U1	1.59045	0.174725	0.27376	0.0967388
SLC36A4	2.746	-0.222579	0.278872	0.0969836	0.198624
LGALS3BP	1.4505	0.16351	0.270712	0.0970542
CCDC80	1.30615	0.160074	0.269192	0.0970785
ALOX15	1.25493	0.154397	0.267261	0.0975229
EIF3K	2.51553	-0.211439	0.284068	0.0982886
MRPL55	2.91232	-0.220468	0.274369	0.0990712	0.202477
TRIOBP	1.58205	0.165985	0.270129	0.0993791
EPDR1	1.60624	0.171831	0.271721	0.0996392
NDEL1	2.53638	-0.206262	0.283297	0.100025
CDC42	2.28651	-0.207602	0.284732	0.100125
SDE2	1.5121	0.166319	0.270187	0.100191
ZNF783	1.43558	0.160462	0.268264	0.100644
NPIPB3	3.53545	-0.216537	0.270253	0.100677	0.20533
TRMU	1.6043	0.169806	0.270756	0.100693
ATRNL1	1.28823	0.149911	0.264175	0.10088
USP22	3.23906	-0.220832	0.267224	0.101182	0.205896
CCDC102A	2.07182	0.185237	0.271006	0.101349
DDX19A	2.98799	-0.2183	0.272054	0.101374	0.205896
PALD1	2.93856	-0.215936	0.274109	0.101763	0.206012
PLOD1	3.88517	-0.219673	0.260569	0.101851	0.206012
SFPQ	3.37366	-0.218974	0.265849	0.102271	0.206385
FUBP1	3.50535	-0.221365	0.259534	0.102542	0.206385
MYL9	20.2387	-0.206068	0.181069	0.102667	0.206385
PCNT	1.79531	0.173437	0.270115	0.102797
TRIM44	2.01321	0.186066	0.269482	0.103227
GOT2	1.7461	0.170458	0.269266	0.103284
HNRNPM	2.53301	-0.210013	0.277931	0.103576
ENO3	6.15463	-0.218758	0.231663	0.104906	0.210455
ZNF568	2.12105	0.186766	0.267498	0.104992
CLCN5	2.63164	-0.209804	0.274785	0.104998
POLDIP3	1.61448	0.166127	0.267719	0.105155
IDH3A	1.91604	0.175247	0.26872	0.10526
ALG14	1.72755	0.171183	0.268169	0.10561
AEBP2	2.92402	-0.212786	0.26953	0.105921	0.212058
SIRT6	1.37991	0.151791	0.262621	0.106295
NPFF	3.69038	-0.217316	0.25537	0.106411	0.212604
ABHD16A	2.27162	-0.201058	0.278725	0.106446
ANKRD23	1.25694	0.149321	0.262015	0.10734
H3-4	1.80399	0.172238	0.267195	0.107413
MRPS16	2.80925	-0.206376	0.271907	0.107462	0.214269
TSC1	1.56885	0.159007	0.264695	0.107614
DAD1	1.71342	0.170287	0.266529	0.107803
ATP1B4	2.55098	-0.194222	0.276043	0.107879
RTN4	5.73629	-0.215565	0.219235	0.109018	0.216931
FNBP1L	2.63291	-0.20526	0.271198	0.109368
GSTT2	2.43233	-0.200152	0.274295	0.109869
H1-5	3.66312	0.199864	0.257308	0.109933	0.217716
R3HDM4	3.87633	0.204195	0.239482	0.110004	0.217716
TRIM66	3.21442	-0.212618	0.258544	0.110079	0.217716
SARDH	2.4461	-0.182904	0.274091	0.110151
SPHK1	1.35873	0.150857	0.260949	0.110179
SEMA4B	1.36628	0.150853	0.260885	0.110345
SNX13	1.86007	0.174768	0.265034	0.110542
MRPL15	1.49809	0.154528	0.26237	0.110681
PRRG3	3.0628	-0.209922	0.262322	0.110882	0.217929
FAM47A	1.93673	0.172705	0.264762	0.110994
CANX	4.61276	-0.215544	0.233151	0.111013	0.217929
PLPP4	2.67832	-0.202845	0.270099	0.111116	0.217929
DOK3	1.82383	0.170128	0.264507	0.111139
XRCC5	3.23324	-0.209438	0.260807	0.111203	0.217929
SF3B1	3.00298	-0.208764	0.26321	0.111297	0.217929
VGLL4	1.36203	0.150183	0.26029	0.111332
GBA2	2.0326	0.177377	0.26455	0.111842
TTLL1	1.57735	-0.34127	0.380354	0.111879
DDX5	4.50641	-0.213051	0.240654	0.112355	0.219561
CPNE5	2.47452	-0.200036	0.270798	0.112649
OVOL1	3.12189	-0.206013	0.262239	0.112783	0.219961
SFRP2	1.60295	0.162261	0.263068	0.113216
CUL7	2.63874	-0.144927	0.260197	0.113575
RAD51B	1.3503	0.148258	0.259082	0.113671
ZNF175	1.37134	0.148383	0.258962	0.113823
PDCL	1.64741	0.161161	0.262223	0.113962
KRTAP10-10	3.76496	-0.209932	0.248516	0.114493	0.222853
WDR89	1.80453	0.162332	0.262443	0.114604
GPRIN1	1.79935	0.167153	0.262267	0.115013
EXOSC3	2.91216	-0.187881	0.269015	0.115153	0.223693
GALNT2	2.56249	-0.178128	0.2694	0.115938
POLR2A	2.2023	-0.192577	0.270989	0.116069
PRPF4	1.47778	0.153041	0.259904	0.116223
RPS27	3.78271	0.19962	0.233431	0.116375	0.225621
FAM155B	1.37527	0.146476	0.257575	0.116493
SRSF5	5.47333	-0.205924	0.239685	0.11682	0.226036
GET3	1.40157	0.146683	0.257388	0.116944
GABBR1	2.43664	-0.17412	0.268492	0.117259
JDP2	1.84435	0.169274	0.261308	0.117426
LTBP4	5.35692	-0.208314	0.224769	0.117849	0.227579
SPEG	1.68495	0.163999	0.260781	0.117873
NR1D1	1.38495	0.145569	0.256755	0.118184
A2M	1.34231	0.145876	0.25702	0.118453
POU4F1	3.01304	-0.166478	0.265087	0.118716	0.228771
CECR2	2.92743	-0.200713	0.259294	0.118933	0.228771
NOP10	1.66381	0.15591	0.259474	0.118957
POLR2I	1.53608	0.156157	0.259455	0.118978
ZNF17	1.54892	0.154694	0.259108	0.119201
PPP1R2	1.46846	0.149291	0.257789	0.119326
EIF4B	3.68205	-0.203946	0.248934	0.119342	0.229108
CACNG6	1.43835	0.143373	0.255517	0.1198
SNRPD2	2.34921	0.182598	0.254613	0.120349
PLPP1	2.68631	-1.76478	0.379491	0.121146	0.232118
XAF1	1.66138	0.157192	0.258299	0.121402
HNRNPC	3.78872	-0.202844	0.246247	0.12155	0.232437
PPARA	1.74156	0.161621	0.258532	0.121674
TTYH2	2.59063	-0.175575	0.265499	0.12219
TMA7	7.12208	-0.200939	0.196265	0.122335	0.233485
ANGPTL2	1.31258	0.140553	0.254632	0.122683
PKD1	2.88246	-0.197718	0.256597	0.12285	0.234011
UPF3A	2.31366	-0.187655	0.265282	0.122894
BTG1	2.23031	-0.18484	0.266014	0.123223
RPS15	5.94557	0.197418	0.213027	0.123257	0.234331
SCHIP1	1.89257	0.164947	0.257761	0.123599
NPM1	4.41516	-0.204076	0.231872	0.12386	0.234392
RPS9	3.15284	0.183975	0.251232	0.123905	0.234392
LRRN1	2.74507	-0.193965	0.258819	0.124006	0.234392
ATP5MF	2.03562	0.168781	0.257469	0.124061
NUDC	2.44801	-0.187425	0.26312	0.124456
LCE2D	3.47774	-0.181938	0.260344	0.1245	0.234874
LTF	2.75891	-0.174014	0.263049	0.124752	0.234898
RPL10A	4.54125	-0.203134	0.226992	0.125437	0.235735
CYP46A1	1.5193	-0.308313	0.370857	0.12547
GRIP2	1.57024	0.151709	0.256159	0.125524
LIPE	1.65288	0.154047	0.25627	0.125689
CCN2	1.91387	0.16392	0.256393	0.125798
SNX5	2.28967	-0.181881	0.263711	0.125938
HLA-DRB1	3.09409	-0.196373	0.252517	0.126029	0.236395
SKIL	2.31894	-1.18784	0.429902	0.126176
ODC1	2.00199	0.168336	0.256118	0.12632
PET100	1.68259	0.152783	0.255777	0.126417
PIK3R1	2.38291	-0.183615	0.262381	0.127101
MARK3	2.52808	-0.181204	0.261699	0.127342
CASP12	2.94365	-0.191634	0.255076	0.127686	0.239046
H1-7	2.43338	-0.179523	0.261768	0.128561
ZCCHC9	1.75579	0.155225	0.254993	0.128622
TUBB6	3.58451	-0.193416	0.248917	0.128666	0.240421
ERMARD	1.30179	0.138583	0.252456	0.128925
TRAM2	1.91882	0.162176	0.254548	0.129214
TUBA1C	16.2509	-0.18496	0.168222	0.129216	0.240989
TAF6	2.36599	-0.18299	0.260869	0.129482
KIAA0754	2.76886	-0.189881	0.254968	0.12981	0.241201
VDAC1	3.14085	-0.193252	0.249746	0.129821	0.241201
FGF13	2.30404	-0.17953	0.261043	0.130254
SNX15	1.47005	0.145512	0.25325	0.130543
LAPTM4A	2.95575	-0.192716	0.250215	0.130759	0.242484
DHX15	2.49828	-0.185025	0.257296	0.131435
ZNF521	2.76937	-0.18751	0.255034	0.131512	0.243422
DMRTC2	1.62196	-0.0189969	0.190172	0.131536
CARM1	2.13475	-0.178973	0.260791	0.131761
RHOV	4.65568	-0.196639	0.229927	0.131937	0.243524
SPANXA1	2.98994	-0.189753	0.251038	0.132303	0.243524
GUCD1	3.33781	-0.191857	0.24595	0.132494	0.243524
FBXW11	2.49274	-0.179992	0.258427	0.132711
ALDH1B1	1.56113	0.146995	0.252958	0.132771
HDAC7	2.46622	-0.177018	0.259072	0.132775
PDCD6	2.73229	-0.184025	0.255414	0.13292	0.243524
CCDC68	3.13108	-0.187577	0.251234	0.132985	0.243524
ZNF669	4.47553	-0.194562	0.233795	0.133057	0.243524
SLC16A3	1.40151	0.138532	0.250375	0.134054
PIN1	1.50789	0.14227	0.251406	0.13418
SLC9A3R1	1.50223	0.142261	0.251413	0.134207
MED10	1.46623	0.143435	0.251672	0.134325
LRPAP1	2.15808	0.167987	0.249634	0.134421
MRPL36	1.72672	-0.0493126	0.192185	0.134454
PRPF4B	2.65391	-0.183373	0.253987	0.135106
FLNA	2.89453	-0.185301	0.251655	0.135118	0.246835
NECTIN1	2.58097	-0.183625	0.253788	0.135569
RPL26	4.15717	0.186584	0.227734	0.135617	0.247286
COL27A1	2.13124	-0.0216528	0.18599	0.135628
ATP6AP1L	1.60642	0.145486	0.251593	0.13584
KCNJ12	2.49992	-0.178868	0.256147	0.135906
SS18	2.70979	-0.183454	0.252646	0.136263	0.248003
MARCHF7	2.44741	-0.176148	0.256074	0.137003
SPATC1L	1.64953	-1.23859	0.385641	0.137058
KRTAP9-4	2.45321	-0.176922	0.255871	0.137135
CLDN25	1.67377	0.147173	0.251272	0.137167
MICOS13	1.50634	0.142142	0.250506	0.137217
CAV1	2.20731	0.159464	0.250802	0.137458
SORBS2	1.77096	0.148051	0.251309	0.137666
TAF1D	2.49869	-0.176431	0.255455	0.137713
KPNB1	3.13881	-0.186316	0.246561	0.137878	0.250478
SLC17A9	1.41002	0.136415	0.248899	0.137924
RBM5	2.3558	-0.172201	0.256602	0.138195
MITD1	2.15429	-0.171704	0.257259	0.138462
TPR	1.77416	0.151713	0.250632	0.13861
VSIG10	2.33467	-0.175523	0.255866	0.138672
HNRNPH1	4.64197	-0.190951	0.229223	0.138704	0.251513
TOR1AIP2	2.59679	-0.182457	0.251356	0.138752
MAD2L2	1.56661	0.145614	0.250521	0.138799
ALG5	1.55264	0.14469	0.250519	0.139045
AKR1A1	2.89371	-0.182444	0.248811	0.139195	0.251624
CNTROB	1.49708	0.140323	0.249695	0.139237
TCEAL7	3.02972	-0.183283	0.247929	0.13956	0.251624
TCF4	3.24256	-0.187239	0.242472	0.139571	0.251624
SRL	3.51165	-0.186613	0.241672	0.139791	0.251624
APOF	1.30464	0.132887	0.248172	0.139913
IGSF1	2.31642	-0.170184	0.256013	0.140218
HCK	2.75651	-0.175341	0.252687	0.140345	0.252145
MICU3	1.83901	0.149336	0.2498	0.140392
COL16A1	1.54002	0.144268	0.249872	0.140534
C4orf54	3.56407	-0.185201	0.242154	0.140595	0.252145
VPS18	1.59106	0.14321	0.249447	0.140991
HIGD1A	1.64339	0.147381	0.249423	0.141482
BAIAP2L2	1.46056	0.139559	0.248844	0.141553
PEAK1	2.47949	-0.172091	0.253717	0.141609
SSR2	3.59908	-0.188621	0.234852	0.141754	0.25376
GPC1	6.34969	-0.189327	0.210751	0.142084	0.253887
NFIC	4.13	-0.184528	0.237396	0.142813	0.254727
CBL	2.63125	-0.177566	0.250185	0.143036
TRAPPC3	1.47765	0.139974	0.248483	0.143063
EIF3L	2.26946	0.161382	0.246881	0.143119
ZNF384	1.81069	0.152184	0.248706	0.143137
RGMB	2.07711	-0.169012	0.254849	0.14326
SCRN2	1.38393	0.134929	0.247352	0.143305
HNRNPUL2	1.94476	0.150141	0.248744	0.143635
H2AZ1	2.16798	0.16214	0.245868	0.143645
SSX2	1.53628	0.138466	0.247968	0.143687
RPL9	5.9122	0.184196	0.204935	0.143704	0.255556
PSMD1	3.15348	-0.180545	0.24451	0.143799	0.255556
SASS6	1.56996	0.142862	0.248482	0.143928
EP300	1.62747	0.146113	0.248489	0.143979
QARS1	3.3416	-0.177556	0.245813	0.144315	0.25575
RPL26L1	4.35733	-0.189172	0.221787	0.14443	0.25575
PCBP1	5.15215	-0.188874	0.210961	0.144788	0.255922
SELENOH	1.7421	0.147505	0.248089	0.145095
SUGP2	2.81517	-0.174957	0.248962	0.145188	0.256168
YWHAZ	3.69418	-0.186276	0.232117	0.145591	0.256418
TMEM63A	2.57432	-0.173756	0.249882	0.145769
LCN8	1.30309	0.13138	0.246468	0.145869
ASB2	1.5029	0.137093	0.24691	0.146598
SPN	2.63316	-0.152427	0.251985	0.146729
FAM180B	2.4007	-0.168128	0.251671	0.147036
RRP1	1.49285	0.13835	0.24686	0.147356
RASGRP3	1.51244	0.136628	0.246679	0.147379
TRIM47	1.5959	0.140722	0.247067	0.147761
XRCC6	2.52825	-0.172152	0.248925	0.148021
H4C13	2.49819	0.163428	0.241985	0.148314
MARCKS	5.13423	-0.186493	0.209856	0.14839	0.260641
NCS1	1.69949	0.139667	0.246658	0.148398
POLR2E	5.31748	-0.18615	0.211071	0.14852	0.260641
CCDC85A	1.55017	0.133759	0.245391	0.150089
IER5	1.56929	0.138925	0.246275	0.150235
ARID1A	2.6844	-0.167871	0.248491	0.150308	0.262869
FADS1	3.04523	-0.177828	0.240792	0.150326	0.262869
CYC1	1.48153	0.136443	0.24582	0.150419
PPIH	1.55054	0.140309	0.246166	0.150559
ZFAND3	4.22264	-0.18374	0.223935	0.150875	0.263361
FOXI2	1.64124	0.138878	0.245931	0.150881
PHLDB2	2.29204	-0.165026	0.25022	0.151038
KDM5D	2.40337	-0.1672	0.248798	0.151728
GLIS2	2.54512	-0.16889	0.247225	0.152453
ISOC2	1.58604	0.136435	0.245214	0.152473
LMAN1	2.41501	-0.167825	0.247835	0.152958
CSF2RA	1.33229	0.127981	0.243983	0.15333
ASXL2	2.1346	-0.160979	0.250275	0.153347
SLC25A19	8.55303	-0.18072	0.205069	0.153367	0.26692
PDLIM7	5.49356	-0.182941	0.211037	0.153459	0.26692
C17orf75	1.54588	0.138661	0.245228	0.153513
MAP2K5	2.44832	-0.16802	0.247348	0.153668
ALKBH2	2.31695	-0.146353	0.249373	0.153934
ZFP90	1.65186	0.137327	0.24477	0.15408
PPIC	1.49959	0.134687	0.244582	0.154124
CDC42EP1	1.6994	0.138332	0.244759	0.154751
FKBP9	2.89445	-0.168434	0.244124	0.154848	0.268861
SMIM23	1.46869	0.133986	0.244236	0.155278
BARD1	2.17794	-0.160296	0.249034	0.155578
RAP2B	1.89306	0.148981	0.243611	0.155787
RPS28	6.10857	0.176169	0.196519	0.156005	0.27039
RBM39	3.41326	-0.172888	0.238097	0.156433	0.270654
EEF1A2	1.52891	0.133468	0.243677	0.156887
FAU	2.26229	0.151451	0.241625	0.157805
ERG28	1.83826	0.143338	0.243536	0.158021
TSC22D4	1.79219	0.139999	0.243537	0.15814
EIF2S3B	3.80274	-0.176962	0.229073	0.158341	0.273105
SYTL2	3.48146	-0.176729	0.231141	0.158406	0.273105
C17orf58	2.17856	-0.15983	0.247612	0.158549
LY6G5B	2.31175	-0.159547	0.246887	0.159008
GYG1	2.06206	0.147599	0.242285	0.159313
ATXN2	2.25193	-0.151393	0.247493	0.159396
EFCAB2	2.50788	-0.163681	0.244979	0.159625
UBE2L3	2.44271	-0.164294	0.244304	0.15992
MED12	1.34021	0.124859	0.241946	0.159986
RAB10	1.5837	0.134529	0.242985	0.160175
OPRL1	1.40173	0.128736	0.242299	0.160267
NIPA2	1.7479	0.139793	0.242935	0.160587
PTOV1	2.8	-0.161112	0.243735	0.161119	0.277294
UBXN7	2.19551	-0.158209	0.246317	0.161552
PTP4A2	2.99205	-0.166164	0.240307	0.161937	0.278214
ID3	1.74876	0.141355	0.241853	0.162458
ERI3	1.65886	0.137848	0.241851	0.162933
CCDC9	2.37965	-0.161829	0.243817	0.163009
MRPL30	1.84314	0.142897	0.241446	0.163207
PTMS	7.48637	-0.174289	0.184746	0.16361	0.280127
ATP5F1A	3.19964	-0.171562	0.233055	0.163621	0.280127
APBB1	1.4179	0.127758	0.241312	0.163683
FBLN1	2.58887	-0.159905	0.242971	0.164103
GOSR1	1.65943	0.135365	0.241737	0.164431
SOGA1	3.38241	-0.167892	0.235053	0.164705	0.281491
SEMA6A	2.47922	-0.161101	0.242402	0.165533
SLC27A4	2.176	-0.154171	0.244943	0.165668
SAFB2	1.89649	0.144361	0.240268	0.165809
MYOM3	3.63626	-0.170997	0.229159	0.166145	0.283457
DTNBP1	2.1393	-0.155155	0.244679	0.166236
KCNJ9	2.47696	-0.156171	0.242851	0.166751
CUTA	1.61802	0.132794	0.240883	0.166912
ITPR3	1.42959	0.119065	0.239323	0.167018
NRBP2	1.76508	0.137556	0.240605	0.167052
DNTT	2.34122	-0.156575	0.243041	0.167159
PSENEN	1.6832	0.13579	0.240342	0.167735
EMC1	2.55709	-0.145129	0.243653	0.167955
SLC25A52	2.22806	-0.146193	0.244022	0.169001
NDUFB10	1.60421	0.131387	0.24031	0.169234
CLIP3	2.25281	-0.138991	0.243695	0.169435
UBR4	3.1243	-0.161194	0.236545	0.169565	0.288306
MYLK4	4.11089	-0.169026	0.226034	0.169575	0.288306
CALCOCO1	2.03783	0.144269	0.237821	0.170847
PDK1	1.38019	0.120219	0.238919	0.170892
AKR1E2	3.16124	-0.163025	0.234871	0.171039	0.290292
ACVR2A	2.30496	-0.156013	0.241548	0.171079
CD164	2.51247	-0.157542	0.239822	0.171614
S100A4	2.38412	0.147009	0.236025	0.172332
LAMA4	2.5461	-0.152596	0.240807	0.17247
RAPGEF1	2.85189	-0.159686	0.237083	0.172471	0.292217
EIF4H	3.07226	-0.1639	0.233102	0.172804	0.292277
CDK5R2	1.3196	0.119192	0.238467	0.172863
ARHGAP27	2.28314	-0.153692	0.241123	0.173246
ZNF66	2.9389	-0.162044	0.233615	0.174016	0.29382
VPS13B	2.34115	-0.132004	0.241694	0.174704
SCARA3	1.61557	-0.18842	0.263039	0.174712
IGSF21	1.69271	0.132169	0.238467	0.174886
H4C6	1.89926	0.139729	0.237777	0.174913
NDUFA4	1.94318	0.140426	0.237211	0.175148
KLC1	3.32317	-0.160358	0.23315	0.175457	0.295745
MRPL44	1.74153	0.130926	0.238392	0.175641
NCALD	1.92036	0.138662	0.237682	0.175798
PGM2	1.61496	0.129388	0.238494	0.175908
C1QTNF3	2.66078	-0.15715	0.236625	0.17614
ARMCX2	2.3246	-0.155142	0.23889	0.176242
TMEM126B	2.79856	-0.155927	0.236525	0.176427	0.296869
THBS3	1.4195	0.123338	0.238053	0.176636
GRB2	2.63249	-0.156624	0.236958	0.176689
DUSP13	1.66801	0.127799	0.237953	0.177611
SLF2	3.09386	-0.161735	0.230948	0.177895	0.298827
SLC35E2A	2.72541	-0.156857	0.235068	0.178387	0.299141
ZMYM4	2.42003	-0.153922	0.238059	0.178426
PPP3CB	2.57557	-0.145048	0.239518	0.178849
NFATC2	1.98262	0.137503	0.236444	0.178961
IRF9	2.39431	-0.15068	0.238495	0.178968
GAA	1.33865	0.118761	0.237114	0.178994
ROCK2	1.71763	0.130353	0.237327	0.179006
FOXG1	1.41544	1.86967	0.35299	0.179121
DNAJA4	2.71149	-0.157196	0.234151	0.179504	0.3005
BCAR1	1.69439	0.131315	0.236917	0.179934
H2AC1	2.36107	-0.151538	0.23775	0.180127
TBC1D22A	1.99821	0.13796	0.235646	0.180256
ACSS2	1.79257	0.132824	0.236681	0.180475
SRRM3	2.48768	-0.150377	0.237683	0.180772
GNL3L	2.56329	-0.155848	0.234717	0.181092
SLC22A23	1.48681	0.12527	0.236988	0.181707
OLR1	2.33116	-0.149128	0.237803	0.181894
RPL14	2.44422	-0.152822	0.236028	0.182065
TXNIP	2.82953	0.148202	0.230283	0.182318	0.304208
SERBP1	4.53713	-0.164951	0.21577	0.182339	0.304208
RGL2	1.73776	0.127503	0.236476	0.183199
TMEM209	2.48243	-0.150919	0.235858	0.184057
TNFAIP1	2.67533	-0.11309	0.236211	0.184282	0.306845
FOXO6	1.59059	0.126257	0.236225	0.184426
GASK1B	2.16258	0.138981	0.233882	0.18452
SH3GLB2	1.65412	0.124923	0.236278	0.184543
RAPSN	5.02604	-0.164771	0.209902	0.184545	0.306845
DBI	1.64516	0.126261	0.236031	0.184925
PDLIM3	4.81026	0.15955	0.21111	0.184935	0.306973
ABCG1	2.53403	-0.137437	0.238453	0.185119
DCK	3.47667	-0.123021	0.236813	0.185648	0.307636
PRKCQ	1.39217	0.120353	0.236032	0.185712
PUF60	2.73754	-0.154343	0.231434	0.186343	0.308267
JUND	2.26635	0.130777	0.236043	0.186563
ATP5MC3	2.70107	-0.15235	0.232764	0.186706	0.308348
USP7	1.49517	0.118503	0.235403	0.187022
ARPIN	2.07088	-0.144413	0.237507	0.187543
ITGB8	1.69844	0.127342	0.235143	0.187914
UBXN11	1.39682	0.120005	0.235355	0.188261
TUBA4A	2.51508	-0.150902	0.23345	0.18832
CTTN	4.54586	-0.158916	0.21962	0.188391	0.309916
NOTCH3	3.99607	-0.157937	0.222561	0.188485	0.309916
SLC35D2	1.33382	0.116432	0.235002	0.188536
UPK3BL2	3.28615	-0.158306	0.224274	0.188603	0.309916
RARRES2	1.35802	0.115039	0.234786	0.189106
TET2	2.68646	-0.15004	0.233021	0.189445	0.310779
SLC38A6	1.35809	0.114821	0.234714	0.18949
GHITM	1.78017	0.129646	0.234292	0.189692
TMEM171	2.00384	0.130782	0.234137	0.189868
NAP1L1	4.61239	-0.162578	0.209098	0.18997	0.311119
ANKRD62	2.39108	-0.146623	0.234513	0.190507
GGT1	1.39081	0.114257	0.234421	0.190829
CDC34	1.66074	0.123343	0.234726	0.191046
AP2A1	2.07457	0.135974	0.232087	0.191067
ZNF592	2.13761	-0.142352	0.236461	0.191071
SLIRP	1.67452	0.123078	0.234583	0.19121
EMILIN1	2.98994	-0.151753	0.229041	0.191675	0.313389
ADK	2.21159	-0.116911	0.2364	0.191805
PLCD4	1.77777	0.127547	0.233959	0.192388
ABL1	1.33945	0.114578	0.233931	0.19355
ZCCHC3	1.71347	0.125602	0.233628	0.193702
CUL4B	1.68861	0.126547	0.233337	0.194249
CTSO	1.4937	0.116161	0.233834	0.194924
ABHD14A	1.46796	0.116616	0.233766	0.194996
LHFPL2	1.52509	0.12042	0.233808	0.195111
SMIM4	1.4442	0.11629	0.233733	0.195345
UQCRC1	2.45794	-0.144605	0.232656	0.195989
ENPP2	1.31848	0.113262	0.233429	0.196311
PHIP	1.58449	0.122492	0.233376	0.196439
ABHD13	1.68238	0.121159	0.233222	0.197469
PIGM	1.76536	0.124021	0.232743	0.197613
BRD4	3.269	-0.150731	0.225553	0.197869	0.322925
KPNA3	2.51967	-0.142013	0.232483	0.198108
SLC35D1	2.55548	-0.146475	0.230467	0.198254
AHNAK	6.6158	-0.158688	0.184785	0.198416	0.322925
DPH1	1.85609	0.126956	0.232503	0.198476
COL6A6	3.76243	-0.154879	0.218904	0.198495	0.322925
FAIM	2.14307	-0.133307	0.235195	0.198512
ANK2	2.13164	-0.138284	0.234342	0.198561
SCT	2.8943	-0.145957	0.229047	0.198884	0.323022
MTURN	1.49933	0.11849	0.233084	0.198887
DDO	1.68042	0.119595	0.232748	0.199488
AXL	1.5793	0.118542	0.232846	0.199573
FKBP10	4.26534	-0.156824	0.211546	0.199726	0.323853
DKK3	1.44815	0.113341	0.232042	0.199799
PSMA7	2.17325	0.130323	0.230585	0.200197
EGFL7	2.95473	-0.148744	0.226153	0.200211	0.324104
ZNF430	1.7275	0.122838	0.232301	0.200258
CIBAR1	1.88971	0.12806	0.231282	0.200332
RPL11	1.58268	0.11839	0.23288	0.200818
GSTP1	2.23652	0.134663	0.228854	0.200862
FGFR1OP2	2.50035	-0.142811	0.230857	0.201107
TOP2A	2.0786	-0.136969	0.233824	0.201333
EIF3G	2.23666	0.1345	0.228839	0.201443
POU6F1	1.67333	0.122738	0.232174	0.201531
TRA2A	2.52208	-0.142553	0.23046	0.202167
PPP1R14C	1.51097	0.118482	0.23235	0.202233
GGA3	3.69135	-0.153842	0.216712	0.202363	0.327048
ARL2	3.83546	-0.152297	0.21792	0.203288	0.327545
HGF	12.0515	-0.145674	0.150369	0.203338	0.327545
FBL	2.10651	0.132086	0.229458	0.203353
CCT2	2.48266	-0.14122	0.230525	0.203373
GADD45GIP1	1.42993	0.11485	0.232042	0.20367
CSK	1.76161	0.124855	0.230966	0.204149
CCDC137	1.68824	0.119095	0.231706	0.204231
GLRX	1.60183	0.115926	0.231832	0.204375
WDR46	2.06626	0.127051	0.229991	0.204738
GCNT2	1.54136	0.117754	0.231814	0.204775
GPRC5B	1.72171	0.122314	0.23095	0.205048
CEACAM5	2.25938	-0.129866	0.233381	0.20526
LRRC27	2.64492	-0.142005	0.228797	0.205897
CCT6A	2.49159	-0.143728	0.228065	0.205951
PAAF1	1.49971	0.117167	0.231479	0.206451
RABAC1	1.75444	-1.02597	0.39087	0.206476
PKDCC	1.70658	0.12096	0.230948	0.206772
SFT2D1	1.46164	0.113734	0.231403	0.206935
SUMO1	1.97002	0.127616	0.229268	0.207086
MUC21	2.80551	-0.144183	0.225833	0.20739	0.333375
HNRNPA3	4.57931	-0.154584	0.204741	0.207637	0.333375
MYL3	2.71578	-0.141038	0.227996	0.208109	0.333586
GFAP	1.72935	0.120262	0.230537	0.208192
MAP3K13	3.1056	-0.147819	0.22151	0.208612	0.333847
FN3K	1.67091	0.120372	0.230501	0.209031
ZNF775	1.79591	0.122974	0.229873	0.209164
NUTM2G	2.24922	-0.133822	0.230965	0.209908
YAP1	2.2087	-0.135593	0.230542	0.209948
GNAI3	1.52379	0.115726	0.230789	0.210116
GSN	2.80871	-0.141902	0.226063	0.210125	0.335721
SNTB2	1.54801	0.115697	0.230693	0.210556
MRPS14	1.43786	0.110604	0.229923	0.210612
ZNF638	2.58568	-0.140244	0.227553	0.210926
PEA15	1.63413	0.117969	0.230106	0.211376
STT3B	2.22625	-0.118577	0.232771	0.211447
EIF4G1	2.35735	-0.136475	0.229279	0.211657
WAC	2.85397	-0.142105	0.225425	0.211735	0.337382
BBLN	2.91765	-0.142812	0.224287	0.211852	0.337382
DNAJB12	1.88761	0.120415	0.229514	0.212009
ECHDC1	1.84062	0.121915	0.229685	0.212299
H3C3	1.56004	0.114241	0.230296	0.212315
SUB1	2.3425	-0.136876	0.228816	0.212372
RANBP3	1.82944	0.121142	0.229342	0.212577
LRSAM1	1.6347	0.113746	0.230199	0.21298
TAGLN2	3.62848	0.144935	0.210237	0.213004	0.338666
JAG1	1.86449	0.123534	0.228722	0.213283
ABITRAM	2.57722	-0.14072	0.225984	0.213376
RDH12	1.57571	0.113995	0.230066	0.213524
RBP1	2.15285	0.126988	0.227423	0.213847
PUSL1	1.33255	0.108735	0.229995	0.214163
BLCAP	3.49902	-0.146991	0.216606	0.214174	0.339976
MYO18A	1.60409	0.11707	0.229525	0.214428
ATP6V0C	1.64391	0.116274	0.229646	0.214467
NPEPPS	2.65667	-0.14095	0.22496	0.214755
TNFAIP8L2	1.34159	0.108591	0.229856	0.214841
ANTXR1	3.01	-0.140515	0.224331	0.214962	0.340517
NDUFB3	1.64812	0.118543	0.229349	0.215138
LAMP2	2.09477	0.126982	0.22675	0.215396
ANO7	2.7608	-0.129668	0.229386	0.215537	0.340517
AQP3	1.86046	0.120742	0.228472	0.215821
KTN1	2.54731	-0.139026	0.225835	0.215956
ARHGEF40	3.21197	-0.141173	0.222683	0.216001	0.340517
SGPP1	1.57301	0.113835	0.229647	0.216009
SLC6A5	1.62922	0.114697	0.229606	0.216459
CHD8	1.96892	0.124906	0.227151	0.216495
SEL1L	2.19617	-0.133225	0.22895	0.216686
BARX2	2.90685	-2.84221	0.329643	0.216697	0.340517
NCOR2	4.01692	-0.1475	0.212419	0.216808	0.340517
MBD2	1.61583	0.116617	0.228947	0.216827
SELENOW	3.41716	-0.147485	0.214302	0.216881	0.340517
DYNLL2	3.39205	-0.143042	0.219955	0.216945	0.340517
UGGT1	1.79084	0.12104	0.228165	0.217105
SNRPD3	2.56021	-0.124226	0.230274	0.217382
TSC2	1.6236	0.115919	0.229054	0.217495
DDRGK1	2.70953	-0.138692	0.224811	0.2179	0.341469
RHBDF1	1.7031	0.118665	0.228275	0.218065
SOX8	2.91255	-0.137891	0.224072	0.218909	0.342503
DHX8	2.43883	-0.133759	0.227206	0.21914
MID1IP1	1.44626	0.11057	0.229176	0.21926
TNKS1BP1	2.40467	-0.133059	0.227496	0.219291
RNF14	1.42991	0.110318	0.229173	0.219501
CHTOP	2.67368	-0.136868	0.225135	0.21961	0.342968
PAFAH1B2	2.70664	0.130563	0.222964	0.219905	0.342968
GSE1	2.14481	-0.129132	0.229199	0.220045
R3HDM2	2.00097	0.123688	0.226258	0.220342
KIF18B	1.80987	0.119465	0.227515	0.220505
ANAPC7	2.38525	-0.135641	0.225815	0.220758
RING1	2.05017	0.12513	0.225617	0.22104
NDUFB8	1.96275	0.123913	0.225983	0.221091
ZNF707	1.45752	0.110207	0.228806	0.221125
GTF2IRD1	2.12612	-0.131476	0.228015	0.221213
PON3	1.58168	0.115299	0.228243	0.221308
HSPA8	5.10566	-0.148139	0.200919	0.221515	0.34493
FGF11	1.78761	0.119352	0.227032	0.222629
NCAPG	1.61173	0.114192	0.228114	0.222694
HNRNPA0	1.77279	0.119426	0.226971	0.222781
DGKZ	1.47369	0.107452	0.228072	0.222842
FHL3	1.72004	0.115261	0.22801	0.22302
MAN1A1	1.85004	0.12025	0.226882	0.22312
PXN	3.13589	-0.137115	0.222096	0.223174	0.346963
KIAA1143	1.95456	0.120387	0.22649	0.223205
FUCA2	2.24233	-0.133359	0.226088	0.223323
PPDPF	2.93013	0.135814	0.21582	0.223909	0.347485
FAM171A2	3.00633	-0.103248	0.228962	0.224218	0.347485
COIL	1.41915	0.104503	0.228347	0.224282
STMN3	1.80669	0.118753	0.226463	0.224981
TMA16	1.85484	0.121098	0.226001	0.225024
KDM7A	2.46144	-0.132086	0.225649	0.225104
TOP2B	2.47892	-0.131692	0.225786	0.225361
ZNF776	2.62221	-0.117449	0.229206	0.225726
DVL3	2.45402	-0.124639	0.227932	0.225735
PPP5C	2.46948	-0.131936	0.22536	0.225973
CAMLG	1.79116	0.118323	0.226378	0.226012
EPN1	1.79102	0.117877	0.226612	0.226049
DNASE1L1	1.62262	0.112774	0.227586	0.226381
SNN	1.63767	0.1131	0.227386	0.226455
MYOT	3.69746	-0.142251	0.213204	0.227006	0.351251
CDK11A	2.63215	-0.133783	0.223782	0.22701
CUL3	2.17316	-0.127211	0.227358	0.227159
STUB1	1.75213	0.115457	0.226631	0.227197
TNFRSF13B	1.64635	0.107669	0.227426	0.228454
ZNF385A	1.55591	0.10975	0.227346	0.228981
GLS	1.54338	0.110556	0.227125	0.229819
TRIM38	1.74167	0.114525	0.226253	0.229875
NELL2	1.5516	-0.135146	0.229148	0.230202
KANK3	2.98363	-0.134229	0.220862	0.230903	0.356717
PPP6C	2.20727	0.121112	0.22361	0.231151
CPZ	1.60642	0.108692	0.226979	0.231404
H1-4	2.47281	0.121998	0.224425	0.231528
MACROH2A1	1.47593	0.105527	0.226151	0.231763
HSPA4	2.34881	-0.131673	0.223311	0.2318
B3GALNT2	1.97228	0.11946	0.224359	0.23194
SLC25A11	1.53708	0.110122	0.226645	0.232102
C16orf70	1.58208	0.108598	0.226904	0.232109
ZNF343	2.96133	-0.135982	0.219016	0.232316	0.358337
MAP2K7	4.66478	-0.143217	0.201688	0.232763	0.358462
PGPEP1	2.10567	-0.124458	0.226454	0.232832
CLMP	1.71802	0.112995	0.225847	0.23351
NBN	1.65431	-0.178887	0.255299	0.233644
YY1AP1	2.37797	-0.129518	0.223697	0.23367
RPL7L1	2.69733	-0.131933	0.22176	0.233804	0.359502
NAT9	1.90577	0.115023	0.225131	0.23391
CBS	1.75411	0.114951	0.22545	0.234315
SRGAP2B	2.19596	-0.126301	0.225153	0.23444
ATP5F1C	1.77406	0.114152	0.225546	0.234535
VCL	1.77935	0.111595	0.22586	0.234576
DNAJC21	1.8044	0.115417	0.224807	0.23494
TMEM214	2.41362	0.125219	0.219934	0.234987
ATG14	2.37241	-0.109879	0.228024	0.235254
MCL1	3.27232	-0.137106	0.215118	0.235281	0.360905
DUSP3	1.67569	0.113032	0.2255	0.235303
AGO2	2.20237	-0.12734	0.224434	0.23539
CARD8	1.6937	0.113384	0.225239	0.235533
FOSL2	2.71302	-0.127339	0.223116	0.235642	0.360905
RGR	1.57984	0.108794	0.226103	0.235811
PCDH7	3.33238	-0.138568	0.212501	0.235821	0.360905
SMC4	2.51634	-0.130639	0.222024	0.235965
FNBP4	2.44487	-0.125617	0.224414	0.236373
PM20D2	1.59949	0.106029	0.226298	0.236537
UBP1	2.45885	-0.127409	0.223366	0.236727
TSN	1.68398	0.109523	0.225629	0.237375
PABIR2	1.64267	0.110696	0.225285	0.237506
WNT10B	2.22563	-0.125577	0.22431	0.237588
DOK5	1.43968	0.101842	0.226231	0.23765
SRSF8	2.34328	-0.123009	0.224981	0.23775
NFIB	3.89309	-0.137297	0.211784	0.237768	0.363319
AGO1	1.53296	0.108081	0.225838	0.237953
BEX1	1.52065	0.103798	0.225992	0.238096
FBLN2	2.3325	0.121245	0.221909	0.238306
DGCR2	2.50068	-0.126641	0.222983	0.238727
DYRK2	1.6389	0.109962	0.225179	0.238982
PABPC1	2.99517	0.126674	0.216622	0.23998	0.366127
PET117	3.09578	-0.134717	0.21457	0.240598	0.366501
ANXA5	3.33952	-0.135859	0.212603	0.241075	0.366659
ZNF852	2.26421	-0.123297	0.223967	0.241129
CNOT6	1.72144	0.107864	0.225068	0.241171
PITX1	2.46165	-0.126128	0.22233	0.241645
LARS1	2.16097	-0.12478	0.223353	0.241764
SHISA5	1.90299	0.116078	0.222824	0.241766
ATP5ME	2.21318	0.118338	0.221751	0.241943
MFAP3	1.81445	0.11151	0.224246	0.242144
FXR1	2.21363	-0.114696	0.226093	0.242254
CDC25C	2.51774	-0.124974	0.222443	0.24229
RAB21	1.76276	0.11163	0.223863	0.242636
SMPD3	1.59876	0.105615	0.225181	0.242655
RPS8	7.59354	0.138744	0.194571	0.242773	0.368669
OR7A10	1.48388	0.102917	0.224547	0.243418
SDHA	2.31982	-0.122068	0.223485	0.243696
PKP4	1.52099	0.107225	0.224701	0.243952
SSBP4	1.60631	0.106534	0.224779	0.244161
RNF11	2.04026	0.115746	0.222317	0.244192
TPI1	5.81713	-0.139671	0.193941	0.244199	0.370261
DDAH1	2.50059	-0.100872	0.226079	0.245021
MAPK6	2.95417	-0.0990466	0.225847	0.245453	0.371589
CXXC5	2.50748	-0.12794	0.219625	0.245589
CDK2	2.50157	-0.122602	0.222447	0.245747
RBM3	1.89306	0.113799	0.222609	0.245862
ATOH8	1.96776	0.115101	0.222213	0.246038
SFXN1	1.5434	0.105184	0.224727	0.246111
OGN	2.87957	-0.129455	0.216892	0.247057	0.373441
CHST12	1.4939	0.101931	0.224367	0.247159
IRAK1	1.6878	0.107753	0.223766	0.24732
ZDBF2	1.50791	0.105863	0.224411	0.247421
APOA1	2.23933	0.116815	0.220517	0.248018
COQ10A	1.56957	0.104718	0.224322	0.248309
UBE2E2	1.54862	0.103314	0.224592	0.248364
CRP	1.65759	0.107008	0.223846	0.248509
SEC16A	2.03342	-0.11955	0.223437	0.248631
TMBIM6	1.8736	0.112007	0.222297	0.248668
POFUT1	1.60458	0.107632	0.223552	0.249137
SLC24A3	1.57971	0.103006	0.224379	0.249574
TANC1	2.22516	-0.120651	0.222358	0.249724
CBR1	1.67984	0.105671	0.223735	0.25055
GPR107	1.97587	0.110025	0.222672	0.251176
SAT2	1.47589	0.100923	0.223945	0.251676
PTPN18	1.60285	0.10389	0.223802	0.251834
NNMT	2.22166	0.118705	0.218405	0.251976
SDF2L1	1.45147	0.100982	0.223448	0.25224
CCT7	1.73751	0.108431	0.22261	0.252376
TOX4	2.71725	0.12161	0.215486	0.252792	0.380554
ARPC2	3.01403	-0.129116	0.214509	0.252803	0.380554
RPL41	7.06535	0.134813	0.176254	0.252926	0.380554
CACNB1	1.72072	0.107928	0.222627	0.253143
MTRNR2L4	1.60707	0.102525	0.223707	0.253298
CARS1	1.48022	0.100411	0.223545	0.254186
KIF3B	1.54719	0.104159	0.223187	0.254615
PPP1R12B	2.65171	-0.12643	0.216377	0.254659
RAP1GAP2	2.19353	-0.119722	0.221235	0.254726
SON	3.06526	-0.129621	0.212472	0.254735	0.382687
UBE2NL	1.4858	0.10057	0.223042	0.254763
GUK1	1.58221	0.103523	0.223361	0.255024
LRP5	2.27242	-0.116191	0.22232	0.255196
RPL35	5.2363	-0.134097	0.199997	0.255675	0.383512
OR4C3	1.75676	0.107581	0.221992	0.25577
TMEM138	1.61259	0.105545	0.222512	0.25645
SYNM	2.25792	-0.120424	0.220228	0.256547
SMCP	2.7179	-0.123679	0.217352	0.257121	0.384772
PMFBP1	1.48434	0.0999028	0.222863	0.257248
CSNK1A1	3.06119	-0.127292	0.213708	0.257299	0.384772
DACH1	1.48677	0.099822	0.222913	0.257374
CREB3L1	1.59233	0.10566	0.222227	0.257772
ORAI1	1.56192	0.103021	0.222811	0.257975
ZFHX4	2.19965	-0.119117	0.220379	0.258409
EIF5A	2.27014	-0.12071	0.219289	0.258992
WBP4	2.48311	-0.120124	0.219164	0.25939
ZSCAN9	1.64414	0.104035	0.222457	0.259521
ADAM33	1.6745	0.104966	0.221859	0.259555
YWHAE	3.09201	-0.127446	0.212462	0.259587	0.387252
DDOST	2.81311	-0.124196	0.215539	0.259747	0.387252
APOBEC2	1.82358	0.107432	0.221136	0.260211
DIAPH2	1.47724	0.0991637	0.222556	0.260497
FSTL1	6.18279	-0.133024	0.194339	0.260702	0.388085
ATP5MG	2.37361	0.115813	0.216609	0.261599
SEPTIN9	3.17323	-0.127546	0.210696	0.261801	0.388434
UBL3	2.83481	-0.122572	0.215891	0.261871	0.388434
CHORDC1	1.64857	0.103861	0.221854	0.261944
WDR41	1.68688	0.103432	0.221858	0.261944
TNNT2	2.01631	0.1099	0.220106	0.261959
PAPOLA	1.99789	-0.115607	0.221126	0.262001
ADGRG1	1.39952	0.0961268	0.222668	0.26208
ATP5MC2	3.45728	-0.128398	0.208627	0.262123	0.388434
HM13	1.8181	0.108104	0.220485	0.262298
TIMP1	1.80187	0.105851	0.221353	0.262378
MRTFA	2.13857	0.112068	0.218709	0.262583
STYXL2	1.72025	0.106529	0.220689	0.262717
EXOSC6	2.38054	-0.116266	0.220027	0.262721
PLEKHM1	1.43865	0.0992566	0.222187	0.262843
COL15A1	4.89821	-0.128837	0.204936	0.263005	0.389152
CHMP3	2.65368	-0.118856	0.218219	0.263027
TIA1	2.28301	-0.116923	0.219756	0.263233
BCORL1	1.93575	0.108711	0.220006	0.263294
CD44	5.22006	0.126975	0.204014	0.263842	0.389803
DENND2B	1.79401	0.105236	0.220744	0.264419
EIF3B	2.70141	-0.121065	0.216108	0.264821	0.390209
MAP2K1	3.76236	-0.126347	0.209429	0.264912	0.390209
HIF1A	1.6759	0.103378	0.22122	0.265023
NAA38	1.66428	0.10248	0.22148	0.265375
SPIN2A	2.22223	-0.114295	0.220279	0.2656
TRIM28	3.7588	-0.128914	0.205049	0.265701	0.39077
DUS1L	2.59505	-0.121459	0.215697	0.265925
CRIP2	3.36485	0.12216	0.20861	0.26609	0.39077
LSM7	1.67189	0.103023	0.221123	0.266146
RPS21	2.0557	0.110338	0.218083	0.266223
TNFRSF13C	1.56835	0.100705	0.221691	0.266644
EGLN3	1.65104	0.102974	0.220978	0.266648
DSTN	1.86154	0.108473	0.219135	0.267483
ARHGAP26	2.57949	-0.119156	0.216448	0.267843
CCR10	1.61331	0.0993194	0.22162	0.268357
PREB	1.47961	-0.121191	0.223101	0.2687
SDHB	1.84815	0.106875	0.219178	0.268755
RANGRF	2.53054	-0.120049	0.215493	0.269285
PRDX2	2.34836	-0.116975	0.217555	0.269776
COQ9	2.17664	0.112621	0.215843	0.269913
PNMA3	2.42552	-0.115171	0.218368	0.269935
FILIP1L	2.2686	0.112595	0.21612	0.270285
IGF2R	2.60334	-0.120345	0.214732	0.2704
TOMM20	2.6327	-0.1191	0.215565	0.270495
SLC2A4	1.50886	0.0970729	0.221612	0.270549
KLF5	1.66887	0.101034	0.220642	0.271656
CDK15	2.61353	-0.118702	0.215351	0.271817
LELP1	2.06716	-0.111938	0.219642	0.272165
C12orf50	1.55837	0.100015	0.220754	0.272268
CASQ1	1.47142	0.0959748	0.221554	0.27248
MYLK2	1.5405	0.0991875	0.221055	0.272601
RNASEH2A	1.71234	0.103986	0.219447	0.272618
CCDC153	1.85317	0.106379	0.218953	0.272831
PHF2	1.45013	0.0971735	0.221308	0.272863
OAF	1.58302	0.0950515	0.221999	0.272894
CD99	1.94844	0.10615	0.218368	0.273071
LDHA	2.73343	-0.119205	0.214348	0.273147	0.400534
ORMDL1	1.87901	0.104763	0.219024	0.27316
PCOLCE	2.22968	-0.110815	0.219483	0.27343
CHCHD10	1.79913	0.101828	0.219892	0.273873
FOXK1	1.54964	0.0963502	0.221104	0.274157
CARD9	4.60284	-0.128592	0.195344	0.2743	0.401624
ORAI2	1.64286	0.1005	0.220247	0.274504
MTA1	2.22057	-0.112564	0.218509	0.274525
ORM2	2.31346	-0.115023	0.216985	0.275012
SEPTIN8	2.73816	-0.11875	0.213414	0.27584	0.403277
DDIT3	1.64458	0.0997953	0.220221	0.275885
DECR1	1.95138	0.10482	0.218472	0.276074
SEC61A1	1.84757	0.10479	0.218265	0.276127
CHID1	1.4473	0.0964313	0.220823	0.276656
PDXDC1	2.97165	-0.119912	0.211785	0.276718	0.403959
LRCH4	1.56737	0.0989534	0.21999	0.277378
MED24	1.62801	0.1008	0.219449	0.277388
SCRIB	1.79628	0.102285	0.218857	0.277823
MTAP	1.58876	0.0963619	0.220588	0.277867
ZNF516	2.17248	-0.110275	0.218505	0.278225
RAB18	2.48925	0.111601	0.21373	0.278405
CCDC194	2.16887	-0.0816902	0.222651	0.27856
ZFAND5	1.76385	0.102023	0.218804	0.278595
TBRG4	1.98508	-0.0691856	0.196227	0.278724
PARVA	2.12228	0.108609	0.215654	0.278745
GPKOW	2.56686	-0.116459	0.214438	0.278805
CNTRL	1.60056	0.0998416	0.219656	0.278813
VPS26B	1.64368	0.0978955	0.219942	0.279131
ZNF721	3.11522	-0.120385	0.210076	0.279174	0.406939
CAND2	1.59874	0.0973401	0.220131	0.27939
NR1H3	1.69529	0.098452	0.219803	0.279697
ADAMTS2	1.63424	0.0964554	0.220169	0.279954
TRIP6	2.72382	-0.115482	0.214018	0.28058	0.408381
C1QTNF4	1.56653	0.0958801	0.220327	0.280788
WBP11	2.10799	-0.111025	0.217637	0.280934
DHRS1	2.51025	-0.270113	0.298364	0.281075
BRK1	2.43577	-0.116206	0.213922	0.281118
SARS1	1.74274	0.100988	0.218578	0.28164
ZDHHC7	1.52167	0.0952831	0.220165	0.281663
MAGEA8	3.18686	-0.120647	0.207664	0.282772	0.410962
AHDC1	2.51525	-0.111987	0.215501	0.284069
EFR3B	2.61594	-0.112024	0.215356	0.284119
MCM5	2.67736	-0.114696	0.213586	0.284214	0.412446
MTMR10	2.04765	-0.107983	0.218027	0.284679
RNF227	1.74874	0.0994157	0.218588	0.284977
FABP3	1.56029	0.0958053	0.219663	0.284995
C19orf47	1.92221	0.104362	0.216418	0.28513
TFDP1	1.92775	0.100746	0.217705	0.285275
SEPTIN2	3.49768	-0.121879	0.202598	0.286312	0.414474
PNISR	3.63307	-0.122272	0.202295	0.286456	0.414474
IPO5	2.24579	-0.108819	0.216809	0.287089
SERPINF1	2.57488	-0.111936	0.214415	0.287415
NRAP	2.48739	0.105739	0.214772	0.288332
LHFPL6	2.66298	-0.11368	0.212724	0.288601	0.416963
PIK3C2B	1.78762	0.100147	0.217283	0.288697
TOM1	1.82703	0.102109	0.216501	0.288823
GLUL	1.91559	0.102909	0.216204	0.289027
BNIP3	1.51413	0.0932081	0.219394	0.289368
SMIM19	2.22166	-0.11038	0.215198	0.289485
ATG9A	1.80579	0.099059	0.217618	0.289553
C9orf131	1.37782	0.0906857	0.219055	0.289725
RPL36A	3.85892	-0.119877	0.203491	0.290374	0.418335
LMNB2	2.45917	-0.111001	0.214163	0.290743
NUCB1	2.89748	-0.114139	0.211273	0.290824	0.418335
LPAR4	2.00612	-0.104977	0.217579	0.291229
CALM3	2.88711	-0.115943	0.209571	0.291233	0.418335
SEPTIN7	3.84461	-0.122191	0.198449	0.291256	0.418335
DCHS2	2.61903	-0.113655	0.21194	0.291261
ATP5MC1	2.2671	0.106548	0.213341	0.291404
SLC9C2	1.66608	0.0972775	0.217797	0.291544
ALAS2	1.56741	0.091187	0.219462	0.291727
ZNF768	3.1363	-0.116611	0.208028	0.291929	0.418688
RCC1L	2.13142	-0.104463	0.217276	0.29268
SDK2	2.65413	-0.114674	0.209987	0.292746
FMR1	1.68994	0.0967257	0.217771	0.292861
CFH	2.49507	-0.111681	0.21298	0.292936
POLDIP2	1.87422	0.0994561	0.216778	0.293014
ATF7IP	2.16101	-0.106841	0.216135	0.293402
CSPG4	2.21537	-0.108325	0.215259	0.293676
SGTA	2.13837	0.104588	0.213802	0.293946
PRAC1	2.90773	-0.114938	0.209286	0.293979	0.421012
TTC3	3.14478	-0.117298	0.205347	0.294717	0.421453
ZKSCAN1	2.24494	-0.108842	0.214292	0.295408
MAP4K4	2.8731	-0.115526	0.207845	0.295555	0.422037
SYNE3	1.36194	0.0893629	0.218953	0.295582
BBS2	1.99091	-0.104341	0.21668	0.296491
UBA3	1.54916	0.0943744	0.217927	0.296558
KCTD6	1.64125	0.0938263	0.21795	0.297049
RPL27A	4.74133	0.118791	0.193675	0.297377	0.424022
PSKH2	2.21115	-0.106335	0.215249	0.297478
STAT3	2.01472	-0.105092	0.21603	0.297634
SYMPK	1.82802	0.0996763	0.215534	0.297718
BPHL	1.63248	0.0930549	0.217975	0.297755
SHISA2	1.60557	-0.102595	0.215226	0.297927
GMCL1	1.6538	0.0953375	0.217273	0.298014
ACOT1	1.48074	0.092197	0.218234	0.298181
SORBS3	1.55669	0.0941762	0.217544	0.298593
HMGN2	3.20279	-0.111448	0.210052	0.29875	0.425362
CPLX2	2.69273	-0.111618	0.21013	0.299534	0.425859
APOL4	1.4642	0.0917114	0.218157	0.299542
PIAS2	2.31518	-0.0971918	0.217917	0.300158
RNF212	2.20708	-0.107363	0.213899	0.300161
TM4SF1	1.93718	0.0975872	0.216103	0.300364
HCFC1R1	1.42957	0.0880995	0.21886	0.300404
ELOB	1.54189	0.0937121	0.21736	0.30045
KRTAP12-3	1.79117	0.0968055	0.216247	0.300503
KIR3DL1	3.07475	-0.11454	0.206563	0.300535	0.426337
MAT2A	3.05868	-0.11149	0.209624	0.30074	0.426337
NAB1	2.26923	-0.104769	0.214971	0.301074
HABP4	2.00813	0.0992924	0.214875	0.301347
INTS6	2.54913	-0.111102	0.210414	0.301381
CA3	7.97912	0.120055	0.180176	0.301503	0.426803
OPALIN	1.83705	0.0978563	0.215774	0.301582
THBD	1.66409	0.0911594	0.217815	0.301714
ZNF841	2.15154	-0.105948	0.214338	0.301831
RTKN	1.78321	0.0967482	0.215858	0.302117
ATXN1	2.44749	-0.0947749	0.218098	0.302649
ERCC3	1.50598	0.0903515	0.217897	0.302898
ISLR	1.53558	0.0902848	0.217892	0.302912
PRDM4	1.58588	-0.0586016	0.198339	0.303202
AVPR2	1.65383	0.0923453	0.217252	0.30351
SLC2A3	2.22329	-0.104894	0.21434	0.303579
SNCA	2.49405	-0.104001	0.214564	0.303584
RSRC2	1.77646	0.0966993	0.215498	0.304125
PDHA1	2.37668	-0.106655	0.212848	0.30426
ARGLU1	2.8502	-0.110659	0.209043	0.304619	0.430592
SRSF6	2.31668	-0.10579	0.213417	0.304658
C8orf58	2.52499	-0.109888	0.210256	0.304835
KANK1	1.79345	0.0962609	0.21543	0.304916
HMGA1	1.89643	0.0971676	0.215015	0.305452
FARP1	2.94766	-0.112235	0.206538	0.305472	0.431178
AGL	2.39585	-0.10628	0.212845	0.305537
RIOK3	1.48866	0.0871839	0.218269	0.305607
APLP2	2.6036	-0.10908	0.210319	0.305635
POLR2F	1.88748	0.0966135	0.21504	0.306164
HTATSF1	1.98818	-0.10216	0.215189	0.306418
RPL28	4.53848	-0.119179	0.189173	0.306562	0.431538
ALDOA	11.1442	-0.119184	0.170442	0.306636	0.431538
TNNI2	10.1543	-0.119419	0.176101	0.307047	0.431538
TGIF2	2.12159	0.0996379	0.213069	0.307866
PRPF19	1.79766	0.0950169	0.215437	0.307955
SART1	2.31791	-0.0925486	0.217788	0.307961
BET1L	2.29875	0.101938	0.21175	0.30817
VPS13D	2.03074	-0.090953	0.218252	0.30914
GATD3A	1.50657	0.0894794	0.217076	0.309832
RTN2	1.55291	0.0896753	0.217122	0.310076
CLDN11	2.30121	-0.104714	0.212498	0.310152
CHMP1B	1.88039	0.0968458	0.214042	0.310538
PCMT1	1.93698	0.0983288	0.213085	0.310641
GIT1	1.55722	-0.17294	0.253655	0.31111
NAA60	1.60801	-0.0794616	0.204022	0.311936
DCTN1	1.61876	0.0934118	0.21533	0.311973
WIZ	1.88528	-0.0798123	0.201707	0.312067
FAM90A1	1.44524	0.0861802	0.21719	0.312604
KIAA1614	2.94491	-0.107381	0.208953	0.312696	0.438848
PERP	1.47143	0.0857809	0.217611	0.313146
TCEA3	1.94156	0.0974732	0.21294	0.313676
BABAM1	1.52401	0.0886552	0.216616	0.314061
PDLIM1	1.81703	0.0935608	0.214584	0.315113
C8orf82	2.15946	-0.091407	0.216856	0.315154
GLG1	2.43865	-0.105804	0.210061	0.315163
VBP1	1.39253	0.0857089	0.2167	0.315685
MIER3	1.54023	0.0886756	0.216584	0.315874
MYOCD	1.49494	0.0849486	0.217544	0.316599
RIC8A	1.83048	0.092774	0.214681	0.316902
TWSG1	2.36135	-0.100879	0.212845	0.317106
G3BP1	2.22837	-0.101156	0.212735	0.317262
LDHAL6A	3.41399	-0.111953	0.200596	0.317576	0.44506
SNU13	1.66521	-0.0867602	0.205348	0.317669
CD9	2.41113	0.101713	0.209579	0.317681
EXOC7	2.58608	-0.105102	0.209529	0.317842
ANKMY2	1.354	0.0851352	0.217019	0.317978
ALG10	1.50998	0.0869557	0.216459	0.318625
GCC1	1.50308	0.0874518	0.216259	0.318665
WDR13	1.49772	0.0872008	0.21634	0.318778
PPIF	1.79221	0.0923446	0.214389	0.319191
UBL7	1.64362	0.0888149	0.215696	0.319284
ELP5	1.73209	0.090546	0.214996	0.319615
ANAPC13	1.58971	0.0891586	0.215611	0.319633
EREG	1.60168	0.0892743	0.215473	0.319756
CHD7	1.95871	0.0955351	0.212667	0.319773
RPL32	8.21106	0.115224	0.176594	0.31992	0.44751
TEAD3	1.64735	0.0886506	0.215564	0.320288
TUBGCP2	1.38149	0.0848845	0.216208	0.320323
SH2B1	2.10937	-0.0966924	0.214275	0.320325
ANKRD65	3.96028	-0.113339	0.195477	0.320561	0.44751
HIC1	1.69596	0.0914507	0.214787	0.320587
DCX	2.81046	-0.106619	0.20678	0.320693	0.44751
BMF	1.66106	0.0906056	0.214803	0.320912
NUP98	1.73223	0.0902096	0.214813	0.321046
DNAJB6	2.12189	-0.100635	0.212114	0.321276
RPS23	7.37375	0.114524	0.177007	0.321592	0.448128
FOXL3	1.7139	0.0930436	0.213521	0.322029
GSK3B	2.00654	-0.0989845	0.212952	0.322268
MLIP	2.8946	-0.104118	0.208698	0.322523	0.448787
RUNX3	2.35379	-0.102666	0.210141	0.322709
KIDINS220	1.65279	0.0898414	0.21487	0.322761
P2RX1	2.44468	-0.103867	0.209018	0.322926
ATP6AP1	1.71486	0.0906359	0.214174	0.323354
ANKRD1	1.77873	0.0917551	0.213865	0.3234
CDC42BPA	2.12725	-0.0983417	0.212886	0.323433
KCNE5	2.30158	0.099185	0.209357	0.323699
YPEL2	1.63944	0.0854405	0.216048	0.323764
CDC42EP4	1.67715	0.0892499	0.21482	0.323844
COX6C	1.77357	0.0918921	0.213604	0.324162
CDKN1C	4.90652	-0.114769	0.184455	0.324595	0.451031
S100PBP	1.38612	0.0839053	0.216145	0.325344
XKR4	2.66679	-0.105076	0.206439	0.325525	0.451314
ZNF394	1.81295	0.0873025	0.215279	0.32558
SPTB	2.25856	-0.0941385	0.21411	0.32562
ATXN2L	3.12277	-0.106971	0.204181	0.325719	0.451314
NAPG	1.48423	0.0866502	0.21548	0.325817
GOLGB1	2.03847	0.0961384	0.210712	0.326007
MRPL21	1.74227	0.0915849	0.213465	0.326256
NCKAP1	2.3757	-0.0922308	0.214689	0.326296
BABAM2	2.00351	-0.0926389	0.214769	0.326832
MGST2	1.40705	0.0837107	0.215728	0.326845
AFG3L2	2.04658	0.0957528	0.210695	0.327057
ECPAS	3.08095	-0.106029	0.204903	0.327157	0.452667
OXA1L	1.43201	0.0834511	0.21608	0.327507
SULF2	1.82779	0.0908017	0.213447	0.327533
XIRP1	1.53166	0.0847088	0.215665	0.327647
ZNF117	2.7412	-0.105341	0.205085	0.327703	0.452784
PLPP3	2.04753	-0.097672	0.21236	0.327707
SLC20A1	1.64222	0.0894331	0.214115	0.327723
XBP1	1.71958	0.0890014	0.214148	0.327895
ZSCAN25	1.62887	0.0877222	0.214583	0.32798
ANLN	2.29132	-0.101484	0.209382	0.328604
WDR82	1.85643	0.0926151	0.212243	0.329211
CTSZ	1.98641	0.0937826	0.211459	0.329288
CAST	1.65011	0.089615	0.213599	0.329305
MRPL12	1.56007	0.0853047	0.215229	0.329434
LCNL1	1.41727	0.083175	0.215658	0.329696
TMTC1	1.72917	0.088178	0.21413	0.329774
JPH2	2.18438	-0.100002	0.210196	0.329803
TMEM135	1.51462	0.0858505	0.215064	0.329892
TJP3	1.74176	0.0886377	0.21369	0.330944
ATP1B3	2.28579	-0.101188	0.208988	0.331129
DQX1	1.4832	0.0827647	0.215752	0.331443
PCMTD1	1.98075	-0.0959975	0.2123	0.33185
FOXD2	1.57579	0.0872765	0.214032	0.332235
MFN1	2.04723	-0.0952891	0.212388	0.332699
ALKBH5	2.24074	-0.0832191	0.216203	0.333265
NUBP2	1.59245	0.0866526	0.214224	0.333363
MTA3	2.26952	-0.0985323	0.210079	0.33356
SBSN	1.55885	0.0851297	0.214712	0.333598
MYLK3	1.52905	0.0840559	0.215028	0.333688
WWTR1	1.95434	-0.0929979	0.213305	0.334116
RECK	1.57644	0.0869313	0.213836	0.334154
CREBZF	2.04033	-0.0975863	0.210769	0.334206
MRPS18A	2.14738	-0.0961069	0.211465	0.334489
ZC3H7A	2.34636	-0.100006	0.208651	0.3345
KRT20	1.61705	0.0867491	0.213865	0.334522
PLXND1	1.63835	0.0862087	0.214065	0.33456
PTPN9	1.43601	0.0822194	0.215124	0.33534
GNAI2	2.30977	0.0973842	0.207164	0.336347
PSMD8	2.47356	-0.0887517	0.213837	0.336608
NUDT8	1.59104	0.0839718	0.214542	0.33663
PPM1A	1.60302	0.0859372	0.213903	0.336671
BEX2	1.54628	0.0860133	0.21394	0.336968
TMEM132A	1.88723	0.0904567	0.211625	0.337116
PRPF38B	2.81165	-0.10261	0.204814	0.337225	0.465286
CWC25	1.51177	0.0838746	0.214604	0.337328
TRAFD1	1.70409	0.0861213	0.213745	0.33737
MLEC	1.68825	0.087588	0.212942	0.337774
ZC3H11A	3.2138	-0.105929	0.199831	0.33798	0.465671
CDC123	1.51672	0.0839579	0.214431	0.338094
GABRR2	1.6703	0.084221	0.214261	0.338117
PLAUR	1.38022	0.0817642	0.214554	0.338299
VAMP2	1.83875	0.0889224	0.212137	0.338504
TEX13C	1.66395	0.0873987	0.212907	0.338646
SLIT3	1.62723	0.0859479	0.213357	0.338966
CBX8	2.65717	-0.10107	0.205561	0.33917
COL1A1	35.0263	0.110681	0.17099	0.339355	0.466911
DTX3	1.64202	0.0869573	0.21297	0.340327
MAN2C1	1.63321	0.0848385	0.213661	0.340454
TAX1BP3	1.56782	0.0826593	0.214403	0.340676
FOXO3	2.49364	-0.0943169	0.210518	0.340706
TAGLN	1.63751	0.0810266	0.214743	0.341138
COQ4	1.87331	0.0901792	0.210818	0.341479
SYNPO	1.96017	0.0917121	0.209743	0.341704
CALM2	2.0628	-0.0946181	0.210618	0.342046
CSGALNACT2	2.16228	-0.0929138	0.211461	0.342089
FNTA	2.03603	-0.0891993	0.213088	0.342506
ADAMTS9	1.87883	0.0892091	0.211195	0.342608
CLK1	1.85762	0.0881001	0.211688	0.342749
HACL1	2.17339	-0.092486	0.21137	0.34294
SERP1	2.1282	-0.0948043	0.210122	0.343222
BIRC6	1.93349	0.0894239	0.210862	0.34328
SLC34A2	2.19568	-0.0811235	0.215476	0.343332
TMEM109	1.64606	0.0848024	0.21302	0.343918
DCAF1	2.86871	-0.0996715	0.205481	0.344226	0.47295
PGRMC2	2.46417	-0.0887569	0.212693	0.344387
AP2S1	1.65111	0.0839921	0.213292	0.344646
TMEM250	2.86459	-0.0988337	0.205667	0.345215	0.473645
NDUFB7	2.3889	0.0959962	0.205782	0.345345
DNAJB14	1.76701	0.0877698	0.211308	0.346038
HEYL	3.40978	-0.0997405	0.204338	0.346162	0.474281
ZNF678	2.1045	-0.0934347	0.210187	0.346391
OST4	1.84952	0.0849961	0.212545	0.346546
GSTM1	2.25276	-0.0942925	0.20951	0.346727
CDC42SE1	2.10198	-0.0907065	0.211431	0.347406
PDCD7	1.59823	0.0835225	0.213126	0.347509
SCARB2	3.38313	-0.103434	0.198662	0.34768	0.475696
PIGBOS1	1.48838	0.0825228	0.213362	0.348789
GRSF1	1.7807	0.0870996	0.211035	0.349298
EFR3A	2.14269	-0.0935864	0.20942	0.349351
KAT7	2.80375	-0.100088	0.202723	0.350061	0.478286
UCHL1	1.52587	0.0819608	0.213292	0.350064
PRC1	1.6417	0.082952	0.212909	0.35022
AKR1C2	1.80897	0.0863061	0.211205	0.350336
WNT3	1.85687	0.0861455	0.211238	0.35052
FSCN1	1.84499	0.0863451	0.211155	0.35068
ANGPTL1	1.66546	0.083304	0.212367	0.351457
TADA2B	1.96863	0.0893369	0.209102	0.351787
SLC6A8	1.40359	0.0794474	0.213489	0.352249
TTYH1	1.65832	0.0841799	0.21207	0.35235
SEPTIN4	1.65162	0.082079	0.212852	0.352519
UBE2H	2.35307	-1.18925	0.387392	0.352667
DHX9	2.39641	-0.0945937	0.207364	0.35366
MMS19	2.27912	-0.0812717	0.214012	0.353916
ITGA7	2.98628	-0.096926	0.2042	0.354801	0.483467
CHRM1	2.11182	-0.0784467	0.214894	0.354897
PSMA1	2.15674	-0.0930532	0.208361	0.354897
RPL5	6.31078	-0.107065	0.171947	0.35503	0.483467
CDK7	1.43767	0.0789667	0.213292	0.35521
OGA	2.72501	-0.0976457	0.203249	0.355413	0.483467
NDUFA5	1.59055	0.0803196	0.213072	0.355573
HSPB1	3.14856	-0.0999328	0.200927	0.355824	0.483467
GSTK1	1.6108	0.0828478	0.211865	0.355938
TMOD3	1.49396	0.0810945	0.212766	0.356026
SF3A2	1.92988	0.0863634	0.209822	0.357298
PLEKHO1	1.75934	0.0831106	0.211575	0.357555
PBX1	2.33225	-0.094517	0.206257	0.357907
CDH11	1.95314	-0.0886416	0.210542	0.358124
PTP4A1	1.76113	0.0859224	0.209894	0.35838
ZNF622	1.43216	0.0781641	0.213855	0.358779
IMMT	2.2008	-0.0926988	0.207509	0.359011
SSC5D	2.19078	0.0887812	0.208057	0.359277
ZNF37A	3.9541	-0.101037	0.195733	0.359812	0.48821
CXXC1	1.66615	0.0836508	0.210845	0.359888
CCNL1	1.70972	0.083085	0.21109	0.359906
NDUFA9	2.17532	-0.0916898	0.208036	0.360094
DENND10	1.49899	0.0803246	0.212419	0.360298
TCF7L1	2.34262	-0.0936971	0.206346	0.360323
VAT1	1.63439	0.081479	0.211734	0.360444
DAPK1	2.94898	-0.0973553	0.202012	0.360548	0.488532
HLA-E	1.54521	0.0801925	0.212418	0.360639
ARHGAP11A	1.61152	0.0804555	0.212334	0.360748
MATR3	2.59994	-0.0952135	0.204414	0.360978
PEX11G	2.00102	-0.0799749	0.213552	0.361209
RCN3	1.52264	0.0795204	0.212637	0.361365
OSBPL3	1.63122	0.0812035	0.211659	0.361782
SLC16A12	1.85081	0.0845175	0.209888	0.362011
PRPF3	2.43203	0.0914391	0.204869	0.362153
DLL3	1.50094	0.0797353	0.212308	0.362701
CFL2	2.83498	-0.0962703	0.202687	0.362756	0.490847
PEBP1	1.89191	0.0852846	0.209315	0.362907
MPP5	1.50135	0.0795842	0.212342	0.362981
MED13L	1.67189	0.0831138	0.210533	0.363032
VPS37D	1.73671	0.0814086	0.211441	0.363249
GPR160	1.56433	0.0792226	0.212337	0.363257
PIGQ	1.42097	0.0776592	0.212915	0.363286
ZSCAN5B	1.74895	0.0810714	0.211494	0.363348
JPT2	1.87765	0.0845028	0.209612	0.363394
ZNF251	1.6307	0.0806406	0.211701	0.36354
RPLP1	2.49175	0.0866865	0.208433	0.363826
ARHGAP19	1.59385	0.0811381	0.211365	0.363925
DYSF	2.05522	0.0879064	0.207361	0.364009
KIF14	1.5512	0.0787141	0.212425	0.364153
MAF1	1.77552	0.0840287	0.209862	0.364334
SLC40A1	1.58662	0.0790164	0.212245	0.364357
H2AC13	1.64052	0.0804622	0.211603	0.36449
TXLNB	1.74324	0.0813953	0.211204	0.365018
CYGB	1.83994	0.0835344	0.209954	0.365043
SFRP4	4.55828	-0.103068	0.18553	0.36539	0.493729
MAPK12	1.41231	0.0749782	0.213639	0.365512
MAGOH	2.32107	-0.0911372	0.206515	0.36701
SPPL3	2.35158	0.0897312	0.204884	0.368673
PSMB5	2.39403	-0.0923873	0.204924	0.368728
PTPN12	2.68736	-0.0943067	0.202698	0.368747	0.497581
EIF4E2	1.82352	0.0827363	0.209632	0.369044
DPF2	1.71935	0.082138	0.209856	0.369051
RGS9	1.55549	0.0798545	0.211355	0.369144
GNL3	2.05956	-0.0865842	0.209237	0.369458
LRIG2	1.58744	0.0797048	0.21126	0.369461
ARPC3	2.26763	-0.0896163	0.206957	0.369712
STAT5B	1.90253	0.0816687	0.209932	0.369898
FOXI1	1.87369	0.0820781	0.209717	0.370063
NGRN	1.46149	0.0751576	0.212874	0.370153
AMPD1	1.53121	0.0783832	0.211649	0.370557
PFN2	1.88878	0.0835973	0.208816	0.370721
MYL6B	9.31463	-0.102464	0.160814	0.37081	0.499221
SLC25A3	3.15891	-0.0956383	0.199725	0.370981	0.499221
JAG2	1.54496	0.0784878	0.211445	0.371092
RNF170	1.62615	0.0794925	0.211024	0.371186
USP8	1.58303	0.079711	0.210882	0.371254
CDK16	2.57409	-0.0909819	0.20518	0.371258
UTP18	1.7875	0.0809857	0.21002	0.37175
ATP5F1B	4.08599	-0.100396	0.189583	0.37182	0.499665
SOX10	1.47747	0.0737835	0.213333	0.371887
ERGIC1	1.93116	0.0858455	0.206831	0.372259
TGFBI	2.55419	-0.0910056	0.204917	0.372339
OBSCN	1.54424	0.0768822	0.211927	0.372601
CUEDC1	1.94073	0.0800921	0.210447	0.372921
DMAC2	2.07957	0.0865645	0.206083	0.372974
PTGES2	1.81417	0.0797348	0.21067	0.373038
TJAP1	1.54257	0.077842	0.211469	0.373238
TNF	1.4559	0.0760642	0.212281	0.373455
ZC4H2	2.31355	-0.0896084	0.205961	0.373461
PPP2CA	2.67065	-0.0909473	0.204291	0.374004	0.500861
LAT	1.468	0.0759388	0.21225	0.374237
FXYD6	2.88682	-0.0926235	0.20236	0.374376	0.500861
RPL13	3.76317	0.0967284	0.19235	0.374741	0.500861
FHIP1B	2.87578	-0.079759	0.211272	0.374753	0.500861
MINDY3	2.11067	0.0861997	0.205781	0.375005
ACIN1	2.61146	-0.0909911	0.204136	0.375184
NDUFAB1	1.57796	0.0772895	0.211416	0.375235
ALDOB	2.13926	-0.0871407	0.207528	0.375238
CHKB	2.06316	0.0852543	0.20687	0.37529
BCLAF1	2.15975	-0.0877605	0.207087	0.375635
ZNF761	2.28534	-0.0900234	0.205141	0.375853
HMGXB4	1.54554	0.0764159	0.211601	0.376076
ZNF627	1.71889	0.079665	0.210097	0.376181
SPATA21	1.41599	-0.282851	0.359732	0.376577
TMF1	1.93457	0.0819474	0.208665	0.376724
PUS1	1.59394	0.0785412	0.21055	0.37679
POU3F4	2.11197	-0.085936	0.207998	0.376831
RPL24	2.66777	0.09009	0.201656	0.377217	0.50347
ZNF579	2.06088	0.0857303	0.205746	0.377613
MGP	1.77875	0.078873	0.210202	0.377615
ADAMTS14	1.61808	0.0780797	0.210636	0.377825
RAD23A	1.86827	0.0824967	0.208038	0.378371
PTCHD1	1.47008	0.0752707	0.212086	0.378394
PGAP6	1.98032	-0.0830883	0.209354	0.379026
ATP2B1	2.50083	-0.0912708	0.202681	0.379308
COX16	1.61884	0.0781185	0.210279	0.379521
ECH1	1.67613	0.0783115	0.210097	0.379646
PDIA6	2.16748	-0.08509	0.207787	0.379918
PPP1R27	1.4624	0.0748714	0.212106	0.380597
CDK8	3.10202	-0.0941385	0.198087	0.380714	0.506812
ARMCX3	3.03992	-0.0938042	0.198598	0.380755	0.506812
PAOX	2.0739	0.0831167	0.206935	0.381094
H2AC14	2.06018	-1.3176	0.356774	0.381338
UBL5	1.55021	0.0762528	0.210838	0.382003
COX7B	2.00207	0.0833102	0.206499	0.382311
RPL18A	3.12873	0.0926187	0.195526	0.382313	0.508197
OSBPL6	1.55095	0.0762376	0.210781	0.38236
RPA2	1.58964	0.0760015	0.210869	0.382592
DDX3Y	2.52856	0.0857111	0.204625	0.382631
SRC	1.88945	0.0815429	0.20778	0.382777
CNIH1	1.94604	0.0811837	0.20777	0.383233
PARP11	1.56166	0.0749636	0.211168	0.383295
KDM4E	2.03479	-0.0860585	0.206535	0.38346
PRUNE2	1.57455	0.0776483	0.20986	0.383715
NDUFA10	1.64862	0.077386	0.20991	0.383848
NME4	1.75135	0.0757457	0.210741	0.384362
SNRPN	1.60544	0.0778791	0.209542	0.384441
WDR59	1.54285	0.0746333	0.211225	0.384654
SET	2.34972	-0.0872615	0.204898	0.384949
SDC2	2.9867	-0.092314	0.198951	0.385417	0.511629
TUBAL3	2.33145	-0.0867542	0.205185	0.38543
NMRK2	1.4163	0.074261	0.21131	0.385432
ARL16	1.84134	0.0802157	0.207991	0.385455
TMEM248	2.37652	-0.0889232	0.203259	0.38558
EVC2	1.85321	0.0800338	0.208081	0.385674
TTC9	1.42588	0.0741172	0.211542	0.386046
SSR1	2.4516	-0.0867675	0.204958	0.386317
RERE	2.17522	-0.0865584	0.20533	0.386353
PCGF1	1.57642	0.0765012	0.210201	0.386437
H3C6	1.87592	0.0793811	0.208315	0.386473
PHC2	4.26517	-0.0960726	0.190852	0.386494	0.511763
PFN1	3.16254	0.0892155	0.200004	0.386561	0.511763
SREBF2	2.19489	-0.0856996	0.205894	0.386626
MARVELD1	1.7709	0.0776153	0.209378	0.386652
PLCE1	2.18655	-0.0854165	0.20605	0.386786
MKLN1	2.06936	-0.0826397	0.207948	0.386916
GLTP	1.70481	0.076101	0.210049	0.387173
DEXI	1.88738	0.081564	0.206667	0.387696
FLAD1	1.68552	0.0784511	0.208588	0.388503
PNPLA2	2.37096	-0.0872544	0.204015	0.388673
PDE4DIP	7.00406	-0.0984568	0.174235	0.389048	0.514361
ZDHHC11	2.20783	-0.0856697	0.205316	0.389101
H3C8	2.34097	0.0777083	0.209285	0.389276
TMEM258	1.65762	0.0757275	0.210023	0.389358
NDUFS5	1.96934	0.0809319	0.206917	0.389949
ACTR10	2.3188	-0.087379	0.203502	0.389984
GGNBP2	2.16053	-0.0852733	0.20544	0.389991
FST	1.59022	0.0739713	0.210614	0.390151
ITGAV	2.69694	-0.0899508	0.200448	0.390167	0.515146
PHLDA3	1.66729	0.0761133	0.20955	0.390322
ANKRD11	2.13524	-0.0855971	0.205164	0.39055
FBXO11	2.17892	-0.0829849	0.206899	0.390923
ISM2	1.6841	0.0758632	0.209553	0.391169
NUP160	1.52401	0.0749913	0.210019	0.39142
NXPE3	1.59927	0.0743224	0.210301	0.391584
MTMR9	1.47587	0.0721647	0.211193	0.391745
PTPRM	1.72649	0.0771112	0.20881	0.391887
KIF1C	1.7389	0.0770537	0.208859	0.391963
COL6A2	5.57828	-0.0941408	0.190395	0.39197	0.516831
USP13	1.86513	0.0791032	0.207275	0.392699
ADAM15	5.11127	-0.0969946	0.179981	0.392813	0.517248
USE1	1.48084	-0.151067	0.242679	0.392941
CHDH	2.65654	-0.0875099	0.201801	0.393447
CNPY2	2.68102	0.0877716	0.19903	0.39382	0.51786
PGAM2	1.46292	0.0716522	0.211118	0.393871
WASF2	2.17536	-0.0845821	0.205085	0.393924
C18orf32	2.10231	-0.0823383	0.20672	0.394067
USP24	2.20055	-0.0837861	0.205596	0.394123
PTK2	2.05628	-0.0796015	0.208458	0.39418
BNIP2	1.914	0.079994	0.206384	0.394371
BCL2L13	2.25461	-0.0858014	0.203845	0.394401
ATP5PF	2.98651	0.0897647	0.19507	0.394596	0.51786
MGAT5	2.41012	-0.0861775	0.20321	0.394812
H3-3B	3.05122	-0.0916256	0.196078	0.394861	0.51786
SOD1	2.19102	-0.0846348	0.20482	0.3949
NR2F2	1.93423	0.0792774	0.206769	0.394915
DNAJB11	1.98244	0.0809128	0.205673	0.394977
NEXN	2.00227	-0.083479	0.205713	0.395455
DDI2	2.02193	-0.0706608	0.212099	0.395479
STK11IP	1.57853	0.0736062	0.210065	0.395498
STXBP4	2.71262	-0.084899	0.203611	0.395824	0.517995
TSGA10	1.43062	0.0727151	0.210712	0.395825
NEBL	2.81745	-0.0882285	0.200364	0.396021	0.517995
ESD	1.99363	0.080546	0.205684	0.396147
BANF1	2.20628	0.0829485	0.203447	0.396514
ADRM1	1.91364	0.0799636	0.206103	0.396757
GTPBP2	1.89421	0.0770298	0.207878	0.396956
PCID2	2.59017	-0.0873877	0.201202	0.397048
SIPA1L3	1.623	0.0754689	0.208739	0.397189
NECAB2	1.90257	-0.0805229	0.207434	0.397782
ANKRD13B	1.76145	0.0762413	0.208128	0.398172
THOC1	1.7089	0.0763239	0.208174	0.39828
DEK	1.94397	0.0785085	0.206612	0.39841
NDUFB6	2.49366	-0.0864274	0.201987	0.398488
RGS10	1.68518	0.0743805	0.209174	0.398609
PAX6	2.01142	-0.0821051	0.205986	0.398741
KIAA1671	1.58432	0.0732185	0.209733	0.398904
KDM1A	1.50899	-0.789946	0.467981	0.39896
PTPN23	1.90986	-0.0811923	0.206572	0.399324
ZNF674	3.28845	-0.0903644	0.195565	0.399596	0.521976
SERPINA7	2.14633	-0.0837937	0.20432	0.399674
IGDCC4	2.23665	-0.0845133	0.203564	0.399921
ACAD9	2.20461	-0.0832762	0.204437	0.400534
SH3KBP1	2.00003	0.0799894	0.204686	0.402068
PBXIP1	2.23495	0.0832195	0.201722	0.402208
SAT1	1.58162	0.074507	0.208531	0.402699
TBCD	1.88389	0.0764927	0.207146	0.402769
DMPK	3.52678	0.0905702	0.190079	0.402776	0.52543
PARP14	1.96551	0.0778909	0.206076	0.403287
ZBTB1	1.89119	-0.0803496	0.206388	0.403326
SLTM	2.07546	-0.0756387	0.208907	0.403585
TNPO1	2.19634	-0.0827401	0.204169	0.403606
C11orf87	1.77207	0.0681008	0.211045	0.404202
WNK1	2.89189	-0.0878595	0.197663	0.404502	0.52698
ERVV-1	1.58459	0.0720433	0.209727	0.404742
TEX261	1.64238	-1.19627	0.408078	0.404878
ANXA7	1.77623	0.0709518	0.210253	0.405072
MTRNR2L10	50.4919	0.0944353	0.172632	0.405099	0.527059
MGRN1	1.69974	0.0750387	0.207721	0.40556
TMEM182	2.51728	-0.0832978	0.202596	0.406858
METTL22	1.48923	0.0710605	0.210001	0.407154
TNIP1	1.93215	0.0768364	0.206082	0.407367
AREG	1.60955	0.0733247	0.208382	0.40751
FAM135B	1.61	0.0727061	0.208803	0.407775
FOXN3	1.64241	0.0736871	0.20793	0.408036
OR56A4	2.46447	-0.0797966	0.205046	0.408589
HSPB2	1.89993	0.0777465	0.205202	0.408643
XIRP2	2.03586	0.0786789	0.204226	0.408657
MAK	1.6809	0.0727891	0.208373	0.408999
LTN1	1.8824	-0.0797431	0.205584	0.409107
INMT	1.63337	0.0730664	0.208054	0.409963
RWDD1	1.69846	0.0750564	0.206835	0.410069
RFXANK	1.53375	0.0721169	0.208607	0.410117
RPL37A	8.86559	0.0932203	0.163571	0.410292	0.533108
TEX2	1.89673	-0.0785367	0.206109	0.410607
CCL23	1.56971	0.0710988	0.209139	0.410837
TMED9	2.24839	-0.0818243	0.203021	0.411455
RBM42	2.02906	0.0769315	0.205226	0.411532
NCAPH	1.51845	0.0706325	0.209239	0.412127
CHCHD1	1.56426	0.0713579	0.208677	0.412314
BPNT2	1.6445	0.0722648	0.208188	0.412548
LIMA1	1.98381	-0.0784689	0.205689	0.412617
SRFBP1	1.6797	0.0719062	0.208316	0.4128
WASHC1	3.33752	-0.0879345	0.193503	0.412848	0.53572
MARK4	2.04764	-0.0779573	0.20583	0.41337
SAA2	2.49774	-0.078858	0.204675	0.413434
ZRANB2	2.41895	-0.082511	0.201706	0.413461
YJEFN3	1.99213	0.0778219	0.204047	0.413552
RAP1B	1.88917	-0.0784934	0.205561	0.413561
ASGR2	1.99326	-0.0775472	0.206054	0.413618
DIO1	2.13385	-0.0764228	0.206728	0.413749
IGHG3	1.56111	0.0711848	0.208516	0.413848
ACSL3	2.09176	-0.0784277	0.205324	0.413963
CLTCL1	1.8059	0.0726389	0.207638	0.41399
RABGGTB	1.94568	-0.0775087	0.206073	0.414037
CTSA	2.24964	-0.0800006	0.203989	0.414059
UBXN1	1.69775	0.0742689	0.206609	0.414137
CDK5RAP3	2.06613	-0.0791418	0.204749	0.414195
DNAJC8	1.87221	0.0736161	0.206975	0.414326
PPP3R1	2.02751	0.0761468	0.205227	0.414367
CTDP1	1.5259	0.0706514	0.2088	0.414762
ZNF708	2.27623	-0.0811753	0.20263	0.415198
ZNF530	1.643	0.0708532	0.208596	0.415321
PLEKHJ1	1.9972	0.0697563	0.209047	0.415424
PYGO2	1.67008	0.0720495	0.207794	0.415428
NCR1	1.683	0.0712454	0.208257	0.41583
DDX23	1.56699	0.0697741	0.209016	0.415952
ZNF333	1.98916	0.0772198	0.204017	0.415982
[truncated: 2,783 more rows]

## Sheet: FIBERWT_Post_vs_Pre
Gene	baseMean	log2FoldChange	lfcSE	pvalue	padj
EBI3	149.368	1.44532	0.0917147	1.21278e-57	6.06755e-54
MYL12B	90.7651	1.2379	0.0994759	8.3203e-37	2.08132e-33
HSPB6	34.8948	1.75036	0.151147	2.02021e-32	3.36904e-29
JOSD2	68.2682	1.31236	0.121107	5.6658e-29	7.0865e-26
PPDPF	44.9248	1.03505	0.0951063	1.36573e-28	1.36655e-25
COX6A2	53.3992	0.913204	0.0854234	1.20153e-27	1.00188e-24
LGALS1	61.2497	1.05024	0.0990061	2.70883e-27	1.93604e-24
TCAP	123.333	1.36202	0.131772	1.83533e-26	1.14777e-23
MZT2B	186.55	1.62902	0.159264	6.61534e-26	3.6774e-23
KDM4B	60.0507	1.8197	0.187669	1.40177e-23	7.01307e-21
DKK1	31.9478	0.902138	0.092924	1.90919e-23	8.68336e-21
MICALL2	543.101	1.43362	0.148325	2.97801e-23	1.24158e-20
TMEM30A	140.747	1.01696	0.107665	2.05271e-22	7.89979e-20
S100A6	51.2042	1.29408	0.136656	3.09675e-22	1.10664e-19
MGP	30.6241	1.16555	0.127102	1.80459e-21	6.01891e-19
COX7A1	18.9926	1.03528	0.112969	2.93267e-21	9.17008e-19
PEG10	108.386	-1.26489	0.138165	3.27845e-21	9.6483e-19
IGHMBP2	153.236	1.05774	0.12224	2.89578e-19	8.04866e-17
COL27A1	33.7144	0.897335	0.104386	5.55384e-19	1.46241e-16
PTMS	53.0077	0.663244	0.077708	1.30601e-18	3.26699e-16
POLR2L	35.246	0.859441	0.101681	2.01191e-18	4.79313e-16
RPS2	45.673	1.17039	0.139563	2.455e-18	5.5829e-16
MB	169.846	1.20543	0.144091	3.43234e-18	7.46608e-16
HGF	189.884	0.761916	0.091132	5.519e-18	1.15048e-15
S100A10	25.2032	1.03535	0.123883	5.94007e-18	1.18873e-15
RPS12	103.889	1.00194	0.121382	1.10284e-17	2.12212e-15
AHNAK	74.0434	0.769572	0.0944398	2.40652e-17	4.45919e-15
NME2	53.7079	0.807811	0.0988946	3.79958e-17	6.78904e-15
CST3	17.4564	1.0019	0.12444	4.85442e-17	8.37472e-15
ZNF568	32.6182	0.825263	0.102609	5.74365e-17	9.57849e-15
TMA7	97.0498	0.786122	0.0974072	6.08754e-17	9.82451e-15
CRIP1	21.7881	0.946378	0.120075	1.86085e-16	2.88945e-14
RPL7A	110.66	0.84517	0.106758	1.90589e-16	2.88945e-14
IGF2	987.065	0.992441	0.126116	2.50538e-16	3.68659e-14
OTUD1	19.9523	1.19129	0.156137	6.88367e-16	9.83972e-14
FTH1	81.2189	0.878678	0.113873	9.88528e-16	1.37378e-13
H4C8	15.2985	0.976002	0.128324	1.71257e-15	2.31567e-13
TMSB4X	51.3635	1.31639	0.173156	1.97453e-15	2.59962e-13
ATP1B1	37.3478	0.770456	0.102696	4.41757e-15	5.66695e-13
PRMT8	1115.75	-0.373399	0.0483365	1.06994e-14	1.33823e-12
RPL19	84.8809	0.668255	0.0911611	2.71246e-14	3.30785e-12
PAFAH1B2	50.6772	0.943301	0.130028	2.77693e-14	3.30785e-12
MUSTN1	147.812	1.36247	0.189966	3.92711e-14	4.56915e-12
CAPN6	45.8465	-0.815865	0.112904	4.22596e-14	4.76977e-12
YBX3	50.8892	0.882013	0.122495	4.29022e-14	4.76977e-12
TPPP3	73.0592	0.891076	0.123806	5.28764e-14	5.75089e-12
RPS15	79.0139	0.763598	0.106978	8.96309e-14	9.54093e-12
IFITM3	18.0397	0.881668	0.125693	1.51981e-13	1.58408e-11
ELN	32.83	1.04568	0.151366	1.73681e-13	1.77332e-11
R3HDM4	67.6844	0.986371	0.141938	2.01047e-13	2.01168e-11
ACTA1	510.513	0.77052	0.110105	2.15409e-13	2.11312e-11
ITIH4	44.6574	1.18773	0.175054	4.31983e-13	4.15617e-11
KIAA1143	32.5975	0.86246	0.126036	4.71174e-13	4.44771e-11
TTC31	72.0211	0.949261	0.140296	8.79417e-13	8.14764e-11
BANK1	48.2755	-0.647732	0.0950856	9.82452e-13	8.92098e-11
C1QL2	52.9987	-1.04667	0.154176	9.98551e-13	8.92098e-11
CAV1	19.2296	0.96704	0.144339	1.03902e-12	9.11967e-11
ZFP37	60.816	-0.593362	0.0867886	1.0803e-12	9.31856e-11
EEF1D	55.3104	0.555869	0.0820494	1.59682e-12	1.35193e-10
RPLP2	42.7602	0.861243	0.128534	1.62134e-12	1.35193e-10
RPL7	88.8717	0.588548	0.0869763	1.82034e-12	1.49298e-10
MTRNR2L1	301.14	-0.965189	0.146467	2.30661e-12	1.86129e-10
RPS11	68.9157	0.779295	0.116958	2.41089e-12	1.91455e-10
FRMD7	29.0303	0.859391	0.131006	2.9119e-12	2.27628e-10
CXCR4	20.172	0.749558	0.112114	3.1985e-12	2.46186e-10
VIM	149.046	0.718509	0.109914	5.25468e-12	3.98321e-10
RPS14	64.7406	0.761245	0.116457	6.40957e-12	4.78613e-10
RPS6	74.5361	0.598765	0.0915753	6.69385e-12	4.9249e-10
NBL1	42.3789	0.55742	0.0857238	8.13764e-12	5.90038e-10
CDK2AP1	38.6447	0.53834	0.0828193	8.51369e-12	6.08486e-10
SAA2	39.7767	0.718029	0.111592	9.35254e-12	6.59024e-10
IL32	157.069	0.899304	0.140094	9.52642e-12	6.61954e-10
RHOC	26.801	0.676783	0.105614	1.22575e-11	8.4006e-10
RBM3	18.1181	0.795834	0.125186	1.42066e-11	9.60479e-10
LRP6	26.5678	-0.788194	0.123114	1.59049e-11	1.06096e-09
FAU	26.5791	0.657672	0.103441	1.75213e-11	1.15341e-09
RPL8	60.7627	0.776902	0.123203	2.18339e-11	1.41864e-09
TNNI2	259.276	0.524505	0.0822903	2.29899e-11	1.47459e-09
RPL41	119.18	0.832964	0.132538	2.65154e-11	1.6792e-09
SLC22A23	17.0365	0.757824	0.120238	4.36842e-11	2.7319e-09
STBD1	146.972	-0.422192	0.0669348	4.43836e-11	2.74137e-09
RPL12	41.6805	0.94573	0.15309	4.55058e-11	2.77641e-09
CLIC1	16.4173	0.762944	0.123152	4.61879e-11	2.78407e-09
HSPB8	168.616	0.737382	0.119508	5.33531e-11	3.17769e-09
RPS16	39.3197	0.807046	0.131929	6.07704e-11	3.57688e-09
CD44	26.0239	0.64201	0.104698	7.03509e-11	4.09262e-09
TNNC1	219.399	0.878152	0.14434	7.97977e-11	4.58883e-09
RPS5	56.3814	0.650681	0.10694	1.05153e-10	5.97819e-09
KIF1B	68.6724	-0.603591	0.0995374	1.2886e-10	7.24364e-09
RPL37A	161.906	0.641865	0.105759	1.41608e-10	7.87181e-09
PDAP1	28.8899	0.619457	0.103077	1.56005e-10	8.56704e-09
ACSF2	121.798	0.511149	0.0844439	1.5788e-10	8.56704e-09
TNNT3	312.755	0.633959	0.105287	1.59251e-10	8.56704e-09
DDX4	55.0984	-0.963056	0.160998	1.65081e-10	8.78618e-09
RPS23	106.322	0.662841	0.109716	1.67346e-10	8.81297e-09
HSPB1	82.3227	0.954946	0.161705	1.78732e-10	9.31454e-09
PFN1	37.3248	0.691515	0.116724	2.15073e-10	1.09585e-08
MYL6	44.2855	0.594324	0.0995649	2.16431e-10	1.09585e-08
CHD4	41.4816	-0.63041	0.105265	2.16849e-10	1.09585e-08
PXN	40.4942	-0.598803	0.0997329	2.30207e-10	1.15173e-08
NFYA	881.792	-0.401051	0.0664497	2.91326e-10	1.44307e-08
BEST4	17.7989	0.77099	0.132211	3.25874e-10	1.59838e-08
GFAP	18.796	0.728083	0.124761	3.84379e-10	1.86704e-08
RPL22	50.7559	0.593465	0.100533	4.24378e-10	2.0415e-08
ANXA1	18.9134	0.719972	0.123074	4.33827e-10	2.06708e-08
BGN	37.9448	1.2963	0.223666	4.53291e-10	2.13945e-08
RPS3	59.0757	0.808838	0.139494	4.68124e-10	2.18881e-08
CLEC3B	27.0698	0.862993	0.149473	5.11508e-10	2.36951e-08
ADAM15	102.912	2.04579	0.255889	5.66599e-10	2.60064e-08
POSTN	72.0235	-1.03301	0.181386	6.17731e-10	2.80955e-08
LRRN1	37.331	-0.816974	0.140944	6.35002e-10	2.86208e-08
S100A11	26.452	0.616291	0.106924	7.71328e-10	3.44549e-08
RPS17	94.0364	0.597801	0.102934	8.29046e-10	3.67055e-08
IGFBP6	9.055	0.945462	0.167831	1.00201e-09	4.3974e-08
RPS18	58.5013	0.728727	0.127863	1.09828e-09	4.77801e-08
RPL35	87.4814	0.564888	0.0981967	1.21226e-09	5.20478e-08
RPS27A	63.3549	0.527568	0.0915624	1.21719e-09	5.20478e-08
DYNC1H1	137.69	-0.399365	0.0688663	1.25466e-09	5.31953e-08
CSK	17.807	0.814727	0.145828	1.53225e-09	6.44189e-08
SLC25A6	39.8663	0.638366	0.113369	1.67143e-09	6.96846e-08
EIF4A2	49.4596	-0.496324	0.0876566	2.17739e-09	9.00286e-08
ZNF140	284.302	-0.458306	0.0812758	2.49902e-09	1.0248e-07
RPL29	71.6981	0.69084	0.124415	2.56387e-09	1.04285e-07
SIRT6	20.1776	1.21146	0.22259	2.89492e-09	1.16801e-07
RPL27A	74.4904	0.677904	0.122455	3.16279e-09	1.26496e-07
OSBPL2	49.9416	-0.665458	0.120333	3.18832e-09	1.26496e-07
ANGPTL2	14.738	0.921853	0.170749	3.21106e-09	1.26496e-07
DCX	28.5669	-0.716407	0.129559	3.25708e-09	1.27306e-07
NPC2	34.2119	-0.625743	0.112972	3.62429e-09	1.40561e-07
SEMA6A	19.7578	-0.718371	0.130334	3.89552e-09	1.49917e-07
H4C12	13.3357	0.800064	0.147601	4.30352e-09	1.64355e-07
USP9X	33.0969	-0.656301	0.120147	5.22109e-09	1.97887e-07
DRAP1	15.7905	0.799302	0.149776	5.50395e-09	2.0704e-07
RPL37	79.1369	0.561146	0.102577	5.83491e-09	2.17851e-07
PTMA	60.7316	0.605265	0.111127	6.74521e-09	2.49972e-07
TPM3	326.193	0.697129	0.130059	7.11192e-09	2.60754e-07
RPS28	100.096	0.692864	0.128206	7.14039e-09	2.60754e-07
BSG	28.2096	0.567109	0.105426	7.5149e-09	2.70589e-07
NRAP	92.1277	0.729518	0.136707	7.51788e-09	2.70589e-07
RPS10	26.6681	0.810542	0.152556	8.63817e-09	3.08691e-07
TMSB10	52.0312	0.659835	0.124033	1.11024e-08	3.93938e-07
PITX1	30.1168	-0.674798	0.127224	1.14997e-08	4.04185e-07
RPS9	39.8782	0.742348	0.141508	1.15527e-08	4.04185e-07
TAGLN2	27.8665	0.583646	0.110171	1.25123e-08	4.34716e-07
RPL28	59.3066	0.58139	0.109178	1.27054e-08	4.38381e-07
UBA52	49.6047	0.529429	0.100468	1.53496e-08	5.25987e-07
RPL18	64.164	0.686434	0.1324	1.79701e-08	6.11595e-07
ATP5F1D	20.9161	0.732578	0.142034	1.91069e-08	6.45891e-07
DUSP1	33.2992	0.702951	0.137181	2.00501e-08	6.73227e-07
EID1	34.1195	0.541321	0.104215	2.09276e-08	6.98007e-07
ZNF267	71.5993	-0.521985	0.101169	2.66059e-08	8.81519e-07
RNF187	28.7914	0.492478	0.0954395	3.09532e-08	1.01597e-06
WIPI1	30.6031	0.485602	0.0939061	3.10699e-08	1.01597e-06
CRIP2	43.2013	0.747942	0.147959	3.15313e-08	1.02436e-06
RPL13	57.4587	0.861148	0.170775	3.25017e-08	1.04907e-06
RTL8C	98.3824	0.443978	0.0850996	3.2942e-08	1.05647e-06
SMIM17	249.66	-0.585851	0.11538	3.56952e-08	1.13747e-06
ANXA2	29.1469	0.694754	0.13804	3.73837e-08	1.18374e-06
MRPL12	18.7651	0.637437	0.126849	3.88039e-08	1.22098e-06
PFN2	21.7696	0.609596	0.120462	4.00175e-08	1.2513e-06
IGFBP4	50.4093	0.673583	0.134428	4.56188e-08	1.41758e-06
CD248	13.0001	0.751702	0.1521	4.92316e-08	1.5204e-06
RPL18A	45.7878	0.752732	0.150976	5.03212e-08	1.54452e-06
C12orf57	94.5544	-0.47222	0.0932461	5.10605e-08	1.55766e-06
RPS25	24.6035	0.848826	0.174893	6.26346e-08	1.89916e-06
WDR44	27.84	-0.562655	0.111921	6.85244e-08	2.06523e-06
NHLH2	188.601	-0.493382	0.0989933	7.30256e-08	2.18316e-06
CHCHD10	27.1518	0.694595	0.141901	7.33101e-08	2.18316e-06
H3C13	33.4487	0.492193	0.0983492	7.52094e-08	2.22646e-06
SIGIRR	117.681	0.490973	0.098014	7.69246e-08	2.26385e-06
DSG2	7.59021	0.863563	0.179043	8.03e-08	2.34936e-06
SULT1C4	49.6035	-0.5302	0.107274	8.25774e-08	2.40195e-06
SSX2	18.726	0.645275	0.132073	8.52424e-08	2.46513e-06
PKMYT1	35.9577	0.472207	0.0945056	8.57441e-08	2.46539e-06
TSPYL2	31.0118	-0.587783	0.1187	8.68964e-08	2.48425e-06
CCT8	17.2597	-0.679522	0.137405	8.75976e-08	2.49006e-06
CSRNP2	37.742	-0.63249	0.12931	9.17028e-08	2.5852e-06
TAGLN3	17.0573	0.645929	0.133173	9.1978e-08	2.5852e-06
ZNF540	78.6845	-0.473539	0.0951757	9.28592e-08	2.5853e-06
AK1	129.893	0.506175	0.102235	9.30149e-08	2.5853e-06
SEPTIN11	28.702	-0.636803	0.129206	9.39872e-08	2.59789e-06
TOMM7	32.3793	0.522213	0.10572	9.8618e-08	2.71091e-06
SSBP4	14.2373	0.709141	0.147261	1.10476e-07	3.02029e-06
ARL6IP4	32.3797	0.477493	0.0971361	1.15969e-07	3.15323e-06
SERF2	29.766	0.732058	0.152605	1.17404e-07	3.17497e-06
TM4SF1	15.0394	0.685028	0.143133	1.38352e-07	3.72136e-06
ANKRD65	26.9344	-0.628777	0.130191	1.46373e-07	3.91608e-06
RPL14	31.1514	0.473566	0.0973104	1.51884e-07	4.0419e-06
YBX1	35.7753	0.585905	0.122087	1.54066e-07	4.07826e-06
MYH3	1943.03	-0.640966	0.13421	1.56291e-07	4.1154e-06
IP6K2	16.766	0.60795	0.127537	1.57732e-07	4.13159e-06
ALDOA	238.169	0.441258	0.0903671	1.70718e-07	4.44844e-06
RPS24	103.786	0.505846	0.104116	1.76859e-07	4.5846e-06
FBXO15	158.686	-0.652195	0.138017	1.78357e-07	4.59959e-06
RPL10A	58.7118	0.599669	0.125081	1.90743e-07	4.89379e-06
CFL1	41.9541	0.538354	0.112669	1.96723e-07	5.02145e-06
LY6E	12.853	0.671915	0.143357	1.98049e-07	5.02964e-06
H2BS1	18.3033	0.640733	0.135667	2.02029e-07	5.10479e-06
AKT1	21.4845	0.701582	0.151409	2.07541e-07	5.21773e-06
ZNF106	137.821	-0.626378	0.133049	2.12587e-07	5.31788e-06
TET3	273.872	-0.395829	0.0818036	2.1997e-07	5.45766e-06
DNTT	37.4904	-1.04452	0.224067	2.20357e-07	5.45766e-06
KRT8	25.7465	0.66278	0.140997	2.25598e-07	5.55994e-06
S100A4	36.089	0.603807	0.128615	2.39173e-07	5.86561e-06
CCND1	13.4074	0.654374	0.14034	2.45285e-07	5.98615e-06
CAVIN3	15.1	0.593424	0.126843	2.5552e-07	6.20566e-06
CIRBP	46.4473	0.574492	0.123512	2.68704e-07	6.49433e-06
EHD1	23.7127	-0.667102	0.14213	2.74136e-07	6.59376e-06
PPP1R27	19.7169	0.781438	0.172345	2.83188e-07	6.7789e-06
ID3	18.76	0.598318	0.129523	3.06872e-07	7.31085e-06
CD82	20.033	0.551697	0.119021	3.43349e-07	8.1411e-06
ZNF391	67.532	-0.350127	0.072632	3.52699e-07	8.32336e-06
GUK1	15.8899	0.569798	0.123459	3.63991e-07	8.54951e-06
PTPN21	22.0933	-0.59869	0.128533	3.71572e-07	8.68681e-06
RASL10A	87.3568	-0.835069	0.187384	3.92051e-07	9.12294e-06
RPL30	59.7618	0.52249	0.111732	3.99304e-07	9.2487e-06
LMNA	56.6142	0.574755	0.126161	4.56896e-07	1.05339e-05
AGL	39.2381	-0.455128	0.0974434	4.79204e-07	1.09975e-05
LTN1	18.548	-0.710549	0.156118	5.23771e-07	1.19654e-05
TRPM3	18.6413	-0.658934	0.144556	5.5716e-07	1.26703e-05
LRRN4	13.3348	0.692289	0.155718	5.74314e-07	1.30013e-05
ZNF383	112.355	-0.470655	0.102258	5.86335e-07	1.32137e-05
CASQ2	78.5046	-0.486485	0.106486	6.05535e-07	1.35852e-05
H4C1	96.2862	-0.291764	0.0612801	6.20929e-07	1.38683e-05
SNCA	36.2369	-0.84251	0.188029	6.36412e-07	1.4151e-05
EPC1	61.348	-0.394503	0.0852837	6.77638e-07	1.49331e-05
CXCL14	14.9196	0.769414	0.172529	6.80501e-07	1.49331e-05
RPL9	75.0228	0.502218	0.109623	6.80541e-07	1.49331e-05
COL1A1	565.088	0.900656	0.203368	6.931e-07	1.51423e-05
MAP2K3	19.0115	0.563091	0.125718	7.09211e-07	1.54269e-05
RPS8	103.165	0.432033	0.0937106	7.35071e-07	1.59202e-05
UQCR11	25.888	0.620096	0.139295	7.4584e-07	1.60838e-05
MRFAP1	37.7083	0.471711	0.103972	7.85385e-07	1.68639e-05
TSNAX	30.1689	-0.521055	0.115214	7.92815e-07	1.69507e-05
HNRNPA1	98.8804	0.417211	0.0913065	8.01894e-07	1.70718e-05
NEO1	21.7767	-0.68769	0.154688	8.20077e-07	1.73849e-05
DHRS1	34.0016	0.587667	0.132942	8.91845e-07	1.88184e-05
EEF1G	126.325	0.438577	0.096748	8.9522e-07	1.88184e-05
HIPK3	30.8929	-0.531826	0.119009	9.01837e-07	1.88782e-05
GGT1	13.4588	0.615437	0.14027	9.2513e-07	1.92851e-05
PALD1	34.154	0.41055	0.0906472	9.35741e-07	1.94254e-05
RPL26	72.2688	0.558841	0.124715	9.54606e-07	1.97351e-05
PHF12	17.2336	-0.689784	0.155788	9.75046e-07	2.00747e-05
PRKCZ	22.7836	-0.594669	0.13397	1.0158e-06	2.08282e-05
TEX9	36.0446	-0.492019	0.109684	1.04436e-06	2.13262e-05
ATF4	37.8708	0.398055	0.0881538	1.09487e-06	2.22668e-05
RPLP0	32.6862	0.735941	0.170035	1.11109e-06	2.25052e-05
RPL21	70.2727	0.50752	0.114679	1.23547e-06	2.49235e-05
RPL34	106.214	0.491295	0.110492	1.31771e-06	2.64759e-05
RPL31	66.3045	0.545354	0.123928	1.39077e-06	2.78322e-05
LASP1	21.5598	0.544565	0.125911	1.4154e-06	2.82122e-05
THBS4	203.493	-0.976343	0.233959	1.45459e-06	2.88783e-05
TRAK2	15.1247	0.572798	0.132979	1.47407e-06	2.91493e-05
RPS27	48.7814	0.545296	0.125113	1.71199e-06	3.37209e-05
TNNT1	436.839	0.652396	0.152718	1.73369e-06	3.40143e-05
CRYAB	320.572	0.441399	0.100418	1.79072e-06	3.4996e-05
KRT19	15.0226	1.09311	0.26285	1.90545e-06	3.70933e-05
GABARAP	35.8439	0.466525	0.107602	2.06976e-06	4.01358e-05
RBM42	22.1199	0.475114	0.110554	2.14124e-06	4.13615e-05
UBXN1	19.1621	0.500832	0.117471	2.17834e-06	4.19163e-05
ETV3	184.261	-0.317366	0.0710166	2.18851e-06	4.19507e-05
RPL6	98.2558	0.407784	0.0931075	2.19804e-06	4.19725e-05
SMARCC2	21.0562	-0.578831	0.135422	2.26509e-06	4.30884e-05
CD63	120.651	0.364615	0.0824991	2.29805e-06	4.35499e-05
NDUFA13	16.0012	0.627189	0.150851	2.40723e-06	4.54467e-05
FADS3	33.5046	0.397169	0.0914719	2.4226e-06	4.5565e-05
PLCE1	19.5605	-0.610147	0.143788	2.43384e-06	4.56049e-05
ZNF207	32.5881	-0.515215	0.1196	2.4952e-06	4.65802e-05
KDELR2	12.2022	0.606012	0.143451	2.62549e-06	4.88302e-05
C19orf47	22.0628	0.466416	0.109653	2.66201e-06	4.92405e-05
BARD1	27.5628	-0.898177	0.217572	2.66724e-06	4.92405e-05
ELOB	19.0431	0.573914	0.137472	2.67983e-06	4.92912e-05
RPL15	60.4286	0.556752	0.132464	2.74141e-06	5.01269e-05
FBRS	35.0642	0.414453	0.0964013	2.74531e-06	5.01269e-05
SGCB	31.3619	-0.460823	0.106979	2.80988e-06	5.11193e-05
BRME1	18.158	-0.672534	0.16084	2.84148e-06	5.14302e-05
SQSTM1	40.9836	0.531123	0.126859	2.84752e-06	5.14302e-05
EBF1	49.3271	-0.541412	0.129005	3.0286e-06	5.44204e-05
EIF3L	28.8179	0.493911	0.11724	3.03601e-06	5.44204e-05
ZNF350	32.3325	-0.439918	0.102424	3.04572e-06	5.44204e-05
SULT1A4	25.9773	-0.550124	0.130339	3.15973e-06	5.62546e-05
H4C6	13.9503	0.573085	0.138103	3.18931e-06	5.62546e-05
BCL2L2	54.6416	0.385036	0.089106	3.18956e-06	5.62546e-05
APLP2	23.4372	-0.508542	0.119663	3.19334e-06	5.62546e-05
STAG2	23.5832	-0.577023	0.137665	3.25965e-06	5.72211e-05
RPL13A	40.0735	0.472568	0.112131	3.35647e-06	5.8515e-05
BLOC1S1	15.6426	0.57285	0.139613	3.35675e-06	5.8515e-05
DDRGK1	44.3632	0.409189	0.0961332	3.44302e-06	5.98105e-05
KDELR1	18.9275	0.536983	0.129933	3.64856e-06	6.31617e-05
SBSN	18.2532	0.536442	0.129544	3.8951e-06	6.71735e-05
ACTN2	324.698	-0.472468	0.113178	3.90715e-06	6.71735e-05
FGF13	26.5097	-0.933096	0.232461	3.95342e-06	6.77361e-05
RGS16	30.1902	-0.665235	0.163532	4.05664e-06	6.92676e-05
AAMP	98.686	-0.331549	0.0769593	4.14965e-06	7.06146e-05
SLC35F3	19.5794	-0.595101	0.144851	4.35819e-06	7.39119e-05
ATP6V1G1	21.7782	0.49149	0.118326	4.56e-06	7.70732e-05
NAA38	17.1035	0.541946	0.133462	4.58368e-06	7.72126e-05
ISOC2	12.2017	0.599607	0.145408	4.72357e-06	7.93021e-05
IGF2R	27.5141	-0.469485	0.112618	4.83749e-06	8.09431e-05
ZNF506	218.107	-0.5054	0.123827	5.07843e-06	8.46913e-05
PRKDC	31.3704	-0.454875	0.109476	5.17625e-06	8.60357e-05
SLC38A2	34.221	-0.555712	0.135926	5.21968e-06	8.64196e-05
RPL24	43.3831	0.589389	0.147111	5.23389e-06	8.64196e-05
FAM25A	21.3804	-0.706482	0.175475	5.40192e-06	8.89007e-05
DYNLL2	46.0658	0.381554	0.0913044	5.48302e-06	8.99395e-05
DUX4	197.834	0.423153	0.10239	5.50323e-06	8.9976e-05
NTMT1	17.6238	0.511148	0.12648	5.53802e-06	9.02498e-05
ATP1B4	40.6523	-0.428204	0.103215	5.6667e-06	9.20471e-05
PLOD1	40.6356	-0.507676	0.123864	5.7305e-06	9.27821e-05
RACK1	57.4769	0.479061	0.116657	6.02322e-06	9.7207e-05
S100A16	9.52815	0.663789	0.167282	6.05025e-06	9.73292e-05
LIPE	19.5683	0.528281	0.131921	6.47772e-06	0.000103872
ZNF609	27.4571	-0.649987	0.162956	6.50621e-06	0.000103995
CD81	39.5571	0.439317	0.106727	6.64527e-06	0.00010588
RAB1B	26.4196	0.506471	0.126444	6.91408e-06	0.000109813
PPP2R2B	17.6115	-0.681837	0.172433	7.02433e-06	0.000111211
NAT8L	14.1548	0.708579	0.183268	7.45864e-06	0.000117715
CCDC88B	73.975	-0.351126	0.0847103	7.74685e-06	0.000121879
SMOC2	22.0598	-0.566974	0.142376	7.91016e-06	0.000124058
ZNF680	33.3377	-0.466881	0.115964	8.14507e-06	0.000127343
GALNT18	34.5238	-0.50841	0.127253	8.22734e-06	0.000128229
UPK1B	36.1127	-0.906502	0.236906	8.44847e-06	0.000131024
ANTXR1	30.9068	0.463572	0.116312	8.45906e-06	0.000131024
COL5A2	58.8494	-0.482914	0.120819	8.50393e-06	0.000131312
PTPN23	21.448	-0.496637	0.123624	8.67822e-06	0.000133591
NDUFC1	16.5491	0.512313	0.130283	8.8408e-06	0.000135676
DPPA2	28.6042	-0.577675	0.1476	8.99317e-06	0.000137593
PRDM5	37.0634	-0.429768	0.107164	9.4317e-06	0.000143862
DCAF12L1	20.0603	-0.97527	0.259814	1.09347e-05	0.000166281
PTBP1	78.4569	0.5605	0.144069	1.10861e-05	0.000168072
EEF1B2	22.7688	0.463641	0.117909	1.11443e-05	0.000168443
CDK2	23.9739	-0.673297	0.175152	1.12996e-05	0.000170053
SNAP29	26.3018	-0.536518	0.137121	1.13188e-05	0.000170053
FAM3A	23.5537	-0.511941	0.130446	1.1988e-05	0.000179569
CA3	298.76	0.619096	0.161776	1.20486e-05	0.000179938
SMPD3	12.3943	0.600189	0.158914	1.23046e-05	0.000183213
CTNNA1	38.3695	-0.450741	0.114484	1.26003e-05	0.00018706
ZNF586	29.9459	-0.441613	0.111773	1.26731e-05	0.000187584
RPS19	43.061	0.684157	0.181625	1.28656e-05	0.000189871
UPF2	30.911	-0.832566	0.221784	1.29153e-05	0.000190044
CASQ1	13.8878	0.703063	0.190501	1.3166e-05	0.000193166
MYL6B	196.536	0.452535	0.115593	1.36586e-05	0.000199807
ORAI1	19.9639	0.477833	0.123599	1.37819e-05	0.000201023
ERBB2	20.1623	-0.523151	0.134644	1.3872e-05	0.000201749
BANF1	25.5023	0.468899	0.120915	1.39344e-05	0.00020207
TESC	168.139	-0.415777	0.106734	1.43736e-05	0.000207836
ZNF358	21.946	0.453697	0.117361	1.45868e-05	0.000210093
WNT10B	26.2491	-0.606221	0.159403	1.46137e-05	0.000210093
CCN1	18.5761	0.520523	0.136862	1.49172e-05	0.000213842
PCBP4	23.384	0.414994	0.106557	1.52036e-05	0.000216924
KPNA3	30.6305	-0.588577	0.154907	1.52189e-05	0.000216924
MRPL41	8.38202	0.791278	0.218827	1.5343e-05	0.000218071
MALRD1	40.3391	-0.385212	0.0979432	1.69309e-05	0.000239959
GOLGA8A	65.9668	-0.522953	0.137383	1.73442e-05	0.000245121
RNPEP	29.9963	-0.539622	0.143023	1.74773e-05	0.000246306
CKB	48.2549	0.58507	0.156289	1.77131e-05	0.000248929
RPS29	28.8091	0.589711	0.157673	1.78653e-05	0.000250365
SEPTIN5	40.873	-0.384954	0.0981562	1.79205e-05	0.000250437
PABPC1	27.9025	0.592381	0.160908	1.83314e-05	0.000255465
DOCK7	20.2864	-0.666976	0.178234	1.84869e-05	0.000256854
PLEKHA8	18.3295	-0.615708	0.164085	1.85338e-05	0.000256854
XRCC2	168.405	-0.419409	0.109325	1.8801e-05	0.000259838
UBAC1	18.7079	0.648693	0.17568	2.05295e-05	0.000282945
MIB1	20.6875	-0.473387	0.123698	2.08169e-05	0.000286118
RAD21	31.363	-0.411216	0.106646	2.20657e-05	0.000302451
NBPF14	37.1446	-0.434393	0.114146	2.32018e-05	0.000317154
NCL	43.8775	-0.366942	0.0947393	2.38568e-05	0.00032522
HMGB1	102.426	-0.343051	0.0886054	2.41658e-05	0.000328536
XIRP2	51.1607	0.0921448	0.111124	2.45379e-05	0.000332429
ADGRL2	27.4856	-0.506063	0.134908	2.4585e-05	0.000332429
AKIRIN2	21.1275	-0.526513	0.140933	2.48143e-05	0.000334626
EPN1	21.9479	0.513025	0.139692	2.5207e-05	0.000338851
CFAP99	11.935	0.551162	0.152254	2.52631e-05	0.000338851
TAX1BP3	16.3846	0.472743	0.127574	2.5333e-05	0.00033888
WWOX	13.2972	-0.709033	0.193834	2.54228e-05	0.000339174
RAD23B	110.23	-0.313177	0.0804659	2.57964e-05	0.00034306
ZNF334	37.0792	-0.404729	0.106586	2.58512e-05	0.00034306
APP	47.1131	-0.395563	0.103441	2.63305e-05	0.000348496
RTL1	60.3418	-0.812295	0.234652	2.66502e-05	0.000351797
NDUFB8	25.9126	0.435134	0.116517	2.72323e-05	0.000358534
COX8A	25.4693	0.433564	0.115795	2.77897e-05	0.000364914
TRMU	14.6204	0.493312	0.134583	2.801e-05	0.000365947
ASXL2	27.3126	-0.658698	0.182642	2.80148e-05	0.000365947
GLG1	26.0557	-0.444436	0.118716	2.97737e-05	0.000387912
RPL10L	33.6009	0.474932	0.129913	3.01703e-05	0.000392057
APOL1	16.5821	-0.704602	0.197928	3.16753e-05	0.000410548
ZFP1	43.6213	-0.375688	0.0996096	3.24048e-05	0.000418918
RAB34	19.6083	0.438217	0.119293	3.30732e-05	0.000426457
FNBP1L	32.738	-0.558399	0.153384	3.3199e-05	0.000426978
SSC5D	12.562	0.583188	0.164962	3.43379e-05	0.000440493
ECPAS	40.7321	-0.40447	0.10789	3.51091e-05	0.000449235
SMAD7	54.7581	-0.516917	0.1432	3.58518e-05	0.000457568
NUCKS1	51.9663	0.539751	0.151339	3.66801e-05	0.000465935
NDUFB10	19.248	0.421465	0.11523	3.66937e-05	0.000465935
RPS20	62.0693	0.405806	0.109029	3.68161e-05	0.000466306
H2BC4	10.2286	0.616222	0.17642	3.70631e-05	0.000468249
CCDC179	20.004	-0.612649	0.17189	3.72007e-05	0.000468804
FBXW12	23.1027	-0.512587	0.14121	3.72975e-05	0.000468843
KRTAP5-8	12.2278	0.521124	0.147112	3.82698e-05	0.000478083
GRIK5	20.2919	0.440548	0.121735	3.82955e-05	0.000478083
ERGIC1	21.1429	0.428957	0.117555	3.83193e-05	0.000478083
POLDIP2	19.6956	0.423266	0.116045	3.86457e-05	0.000480957
PDE4DIP	200.885	0.34953	0.0934744	3.92103e-05	0.000486772
DAOA	63.6222	-0.276537	0.0718138	3.97144e-05	0.00049181
RPS7	20.1238	0.548152	0.155826	3.99946e-05	0.000494057
KAZALD1	14.4316	0.492485	0.138129	4.04203e-05	0.00049739
MYL12A	95.1944	0.525872	0.147443	4.04632e-05	0.00049739
YWHAE	36.711	-0.373507	0.0997634	4.11419e-05	0.000504492
SEM1	24.7592	0.387179	0.105338	4.28076e-05	0.000522765
MYH7	139.297	-0.705074	0.207988	4.28411e-05	0.000522765
TCF7L2	25.9945	-0.662937	0.189924	4.47313e-05	0.000544502
C17orf97	20.237	-0.641122	0.184985	4.53634e-05	0.000550857
STOX2	31.9271	-0.434369	0.119712	4.60173e-05	0.000557445
KRAS	45.5011	-0.312249	0.0825795	4.66517e-05	0.000563764
RNF113A	53.1394	-0.344871	0.093175	4.70497e-05	0.000567204
PRELID3B	70.4307	-0.35653	0.0967732	4.7379e-05	0.000568664
AP2B1	20.9049	-0.456192	0.126078	4.73982e-05	0.000568664
RPL17	91.9554	0.403679	0.110153	4.94792e-05	0.000591122
FES	11.9447	0.523915	0.151195	4.95063e-05	0.000591122
PLEKHA4	41.4264	-0.359033	0.0970636	4.9722e-05	0.000592284
RPS4X	84.647	0.317	0.084633	4.98495e-05	0.000592392
JDP2	15.1766	0.461121	0.130241	4.99828e-05	0.000592569
TTN	431.043	-0.402071	0.111691	5.12641e-05	0.000606322
TBC1D22A	17.783	-0.5008	0.140778	5.18124e-05	0.000611361
RGS3	26.4008	0.480633	0.137923	5.22767e-05	0.000615389
ISLR	11.8657	0.542792	0.158382	5.29363e-05	0.000621691
ZNF528	30.3667	-0.393389	0.108515	5.44551e-05	0.00063803
RPL39	28.0838	0.489914	0.139119	5.68331e-05	0.000664336
WNK1	27.904	-0.410972	0.114064	5.89125e-05	0.000687038
TM7SF3	38.419	-0.395187	0.109398	5.97306e-05	0.000694959
H2AC11	9.50279	0.566327	0.167559	6.15156e-05	0.000714067
SRSF3	20.1713	0.459167	0.132167	6.23221e-05	0.000721753
GSTP1	21.5573	0.465983	0.134197	6.35302e-05	0.000733745
RPLP1	47.3082	0.815532	0.249942	6.36508e-05	0.000733745
TRAPPC9	21.7359	-0.439593	0.123775	6.38842e-05	0.000734742
IFIT2	13.4769	-0.629667	0.183788	6.43301e-05	0.000738173
NOP53	20.2275	0.418537	0.119361	6.53817e-05	0.000748523
SIX1	14.6592	0.496396	0.145415	6.63049e-05	0.000756581
HEYL	18.5708	-0.46477	0.132041	6.63879e-05	0.000756581
TTC3	26.0694	-0.455317	0.129377	6.73278e-05	0.000765548
RPS3A	117.116	0.360092	0.0995548	6.81973e-05	0.000773676
CNTROB	12.6762	0.491186	0.144557	6.99025e-05	0.000791226
TRIM47	15.8015	0.454572	0.132425	7.16395e-05	0.000809057
PNN	50.723	-0.379194	0.106251	7.21853e-05	0.000813385
DOC2A	23.2728	-0.60501	0.181051	7.43707e-05	0.000836127
CERCAM	12.4006	0.574793	0.173811	7.46711e-05	0.000837622
CARS1	14.2666	0.457564	0.134277	7.77387e-05	0.000870082
SNRPD2	27.2587	0.348825	0.0980047	7.82621e-05	0.000873985
EIF3B	24.8118	-0.413577	0.117785	7.90993e-05	0.000880142
SLC25A5	26.4406	0.410591	0.118032	7.91653e-05	0.000880142
WDR89	19.3426	0.435613	0.126779	7.96726e-05	0.000883818
EIF3A	147.027	-0.21932	0.0583745	8.09015e-05	0.000895465
FSCN1	18.7757	0.519757	0.155221	8.17773e-05	0.000903161
ZIM3	17.7918	-0.501915	0.146002	8.27801e-05	0.000910799
ARHGDIA	28.8368	0.458523	0.135494	8.2833e-05	0.000910799
NDUFA4	30.4996	0.458451	0.133559	8.36421e-05	0.000917679
ALG12	39.558	0.446644	0.129411	8.52892e-05	0.000933703
CASP2	31.5542	-0.384878	0.109532	8.93478e-05	0.000975998
F8A1	16.1901	0.435809	0.128357	8.96621e-05	0.000977297
TECR	10.2944	0.546521	0.166536	9.06987e-05	0.000986447
PRSS54	25.6151	-0.606597	0.183873	9.25896e-05	0.00100483
IFRD2	33.6411	0.40289	0.117238	9.4244e-05	0.00102057
SLN	202.268	0.596296	0.181695	9.50797e-05	0.00102739
TRIM54	44.3133	0.341528	0.0972164	9.64101e-05	0.00103953
TIMP2	22.1355	0.440779	0.130988	0.000100285	0.00107898
RAB21	24.4424	0.395394	0.115817	0.00010064	0.00107977
ARF1	47.2545	0.360788	0.103794	0.00010084	0.00107977
H2AC19	15.0542	0.449992	0.134316	0.000101185	0.00107977
ITM2C	29.5593	-0.386744	0.111282	0.000101222	0.00107977
MSLN	10.5442	0.773382	0.24932	0.000101872	0.0010844
FBL	18.9973	0.397062	0.116536	0.000104538	0.00111041
RBM24	44.2796	-0.393039	0.113879	0.00010529	0.00111603
WASHC1	30.577	0.390153	0.114973	0.00010793	0.00114159
SHMT2	30.0639	-0.367441	0.105814	0.000110707	0.0011685
H2BC10	11.1629	0.506615	0.155792	0.000111519	0.00117458
GNB2	23.3947	0.381691	0.112143	0.000112697	0.0011845
ISCU	22.4097	0.37464	0.10945	0.000113591	0.00119139
PDCD5	20.4559	0.388702	0.114075	0.00011392	0.00119235
RPL38	75.9149	0.403405	0.117956	0.000114809	0.00119914
C9orf47	8.97808	0.559825	0.172711	0.00011644	0.00120881
HES4	9.51845	0.541196	0.168577	0.000116473	0.00120881
DCAF8	20.1079	0.431439	0.129671	0.00011656	0.00120881
PNPO	17.1255	0.421068	0.126029	0.000116701	0.00120881
EIF1	32.407	0.407042	0.120269	0.000117039	0.0012098
PDE7A	136.43	-0.255231	0.0709618	0.000117886	0.00121604
ADAM19	28.5342	-0.398861	0.117015	0.000118994	0.00122491
STAC3	99.627	0.488994	0.149175	0.000119234	0.00122491
SETD5	24.0571	-0.430503	0.127449	0.000121961	0.00125035
CD276	24.5664	0.360965	0.105857	0.000125566	0.00128467
SPANXA1	33.6953	-0.432289	0.129029	0.000126395	0.00128816
CAPNS1	70.4142	0.383197	0.113173	0.000126422	0.00128816
RPL23	29.2079	0.51544	0.159915	0.000127119	0.00129264
SAT1	17.0234	0.416732	0.125425	0.000128681	0.00130587
SH3PXD2A	23.8449	0.430243	0.13008	0.000129798	0.00131453
THY1	19.2021	0.419094	0.125964	0.00013156	0.00132712
PCMTD1	18.086	-0.49972	0.15204	0.000131571	0.00132712
ITM2B	62.6395	-0.386474	0.113895	0.00013214	0.00133018
NDUFB9	24.6015	0.435516	0.131926	0.00013327	0.00133886
IFITM2	75.7628	-0.283224	0.0802785	0.000134886	0.00135144
CAPRIN1	35.4762	-0.355921	0.103536	0.000135063	0.00135144
H4C4	9.62058	0.528962	0.166625	0.000139422	0.00139227
FHL1	145.345	0.558573	0.175907	0.000143214	0.00142729
JUND	21.1289	0.656283	0.215339	0.000144664	0.00143887
CD151	33.1438	0.32795	0.0953835	0.000145049	0.00143984
CNR1	35.1765	-0.734367	0.239112	0.000146891	0.00145345
SBDS	35.2253	0.371605	0.110474	0.000147262	0.00145345
ZNF385A	15.3946	0.432618	0.132969	0.000147291	0.00145345
LARS1	20.7842	-0.469174	0.14273	0.000150529	0.00148247
ANLN	18.6926	-0.61492	0.195442	0.000156492	0.00153818
DIO1	27.1456	-0.454231	0.138902	0.000157898	0.00154833
TEDC2	19.4056	-0.44783	0.136738	0.000158145	0.00154833
SCT	34.8113	0.344082	0.102525	0.00015857	0.00154946
AREG	15.5243	-0.562059	0.175791	0.000158956	0.00155021
VSTM4	19.073	0.393934	0.119899	0.000159808	0.00155457
DMRTC1B	15.8003	-0.561169	0.176583	0.000160025	0.00155457
PDE6D	31.8165	-0.571859	0.180577	0.000161102	0.001562
ZNF66	24.564	-0.404621	0.122054	0.000162259	0.00156777
ISM2	17.0295	0.412883	0.126596	0.000162323	0.00156777
DEFA1B	22.3262	-0.56145	0.176681	0.0001642	0.00158283
MTIF3	31.9687	-0.34511	0.10165	0.000166874	0.00160552
POLDIP3	17.9235	0.424167	0.131815	0.000171443	0.00164631
CALR	36.2006	0.352898	0.105973	0.000176341	0.0016901
DDR1	27.078	0.352409	0.105898	0.000178599	0.00170727
PERP	17.1253	0.547326	0.177846	0.000178815	0.00170727
LUM	16.403	0.47045	0.148332	0.000180735	0.00172232
LSP1	11.2591	0.494848	0.1587	0.000188302	0.00179101
SCRN1	21.4402	-0.404965	0.123582	0.000192199	0.00182415
GJA4	11.4464	0.510644	0.165463	0.000192515	0.00182415
TMEM126B	29.0615	-0.358017	0.107579	0.000194805	0.00184236
ATP5MF	25.7414	0.439292	0.136147	0.000198731	0.00187595
ZHX3	39.7948	-0.324336	0.0962968	0.000199793	0.00188242
H4C5	29.8773	0.385297	0.117282	0.000200863	0.00188894
SF3B3	18.3355	-0.427913	0.131817	0.000202113	0.00189713
FAM171A2	25.0985	-0.393002	0.1201	0.000203265	0.00189806
PDLIM4	29.4299	0.437805	0.138965	0.000203293	0.00189806
COX17	24.3378	0.387533	0.119448	0.00020335	0.00189806
SNX5	17.9301	-0.553009	0.177405	0.000204488	0.00190513
MXRA8	25.0003	0.446749	0.142968	0.000206137	0.0019142
YWHAG	37.7567	0.343427	0.103988	0.000206227	0.0019142
CDK15	24.5665	-0.368998	0.111679	0.000208849	0.00193495
TRIM15	15.7553	-0.511909	0.163575	0.000210984	0.00195111
FAM83E	28.6176	0.483911	0.156724	0.000211721	0.00195432
NDUFV2	36.6012	-0.347416	0.104826	0.000213452	0.00196667
PRSS12	15.259	0.43538	0.138645	0.000218085	0.00200566
STT3A	21.7647	-0.400876	0.123545	0.000219252	0.00201236
SDCBP	49.2781	-0.451707	0.142393	0.000219936	0.00201236
ZNF493	44.673	-0.393283	0.120978	0.000220076	0.00201236
ZNF521	21.1701	-0.407805	0.125886	0.000220422	0.00201236
PEA15	15.6083	0.411647	0.130258	0.000222241	0.00202527
TOMM34	64.175	-0.310722	0.0931207	0.0002236	0.00203394
HNRNPR	28.1858	-0.3766	0.11519	0.000224294	0.00203656
LYRM2	222.139	-0.363194	0.112169	0.000224778	0.00203726
NPDC1	14.9188	0.434684	0.139606	0.000228823	0.00206709
OLFML3	55.8735	-0.334213	0.100696	0.000228896	0.00206709
MCAM	25.9707	-0.450494	0.14474	0.00023415	0.00211073
C16orf78	59.7812	-0.343221	0.105082	0.000237012	0.00213268
TCF25	20.0655	0.454027	0.147128	0.000243013	0.00218089
OAZ2	22.3265	0.354308	0.109953	0.000243242	0.00218089
CARD11	44.0139	-0.29111	0.0867271	0.000248774	0.00222651
FKBP1A	24.4881	0.366308	0.114263	0.000251758	0.00224919
STIP1	79.3847	-0.339677	0.104668	0.000253205	0.00225808
UBXN6	32.2284	0.33233	0.101967	0.000257734	0.00229439
OLR1	35.2807	-0.557575	0.187585	0.000259458	0.00230562
OTUD7A	9.44384	0.875795	0.311081	0.00026463	0.00234742
TAS2R20	16.0585	-0.499377	0.162403	0.000267495	0.00236714
SGCD	37.8864	-0.340809	0.104815	0.0002678	0.00236714
SESN3	28.3025	-0.371535	0.115825	0.00026926	0.00237585
CDK5RAP3	19.9254	0.420883	0.137504	0.000270418	0.00238187
AMACR	17.9429	-0.423699	0.134023	0.000271689	0.00238886
HLA-B	16.5813	0.458688	0.150629	0.000272928	0.00239554
HNRNPCL4	12.0436	-0.609246	0.206246	0.000273521	0.00239654
ASL	20.6185	0.375921	0.119429	0.000279282	0.00244274
ZMYM2	19.9226	-0.41853	0.132693	0.000280338	0.0024477
H3-3B	32.6744	0.361693	0.113504	0.000281495	0.00245094
TIMP3	28.8446	0.389746	0.124596	0.000281821	0.00245094
APOBEC2	32.2811	0.59409	0.203668	0.000282179	0.00245094
ALDOB	15.6466	-0.449413	0.144052	0.000286301	0.00248243
SPACA5	20.3652	-0.407966	0.129355	0.000289963	0.00250984
TYK2	26.096	0.357122	0.112645	0.000292517	0.00252757
NFAM1	46.8755	-0.302781	0.092373	0.000295056	0.00254511
PGAM2	16.73	0.494644	0.166207	0.000297678	0.00256331
ARHGAP27	21.5892	-0.377889	0.118571	0.000298235	0.0025637
CLSTN2	31.0217	-0.422683	0.137005	0.000310839	0.00266745
PODXL	15.312	0.645416	0.228645	0.000315833	0.00270567
C17orf58	19.2755	-0.422279	0.136332	0.00031717	0.00271248
ZC3H13	26.4367	-0.392969	0.125226	0.000320921	0.00273987
ERBIN	16.8881	-0.463254	0.151661	0.000324135	0.00276079
SYP	17.5251	-0.632619	0.221705	0.000324851	0.00276079
ZNF354C	27.4702	-0.343617	0.106974	0.000325027	0.00276079
EPDR1	17.3968	0.40161	0.130272	0.000325793	0.00276188
PLEKHD1	27.7749	-0.374889	0.118913	0.000326258	0.00276188
OAZ1	49.3132	0.337514	0.105765	0.00032852	0.00277633
FLYWCH2	25.8562	0.364116	0.116977	0.000338364	0.00285469
FAM13B	175.472	-0.437587	0.143498	0.000344941	0.00290529
CLDN11	20.6038	-0.405292	0.130711	0.000349564	0.00293927
LTF	25.4858	-0.39947	0.129259	0.000350429	0.00294161
PRRT2	45.36	-0.281004	0.0858865	0.000363223	0.00304389
PEX11G	16.9414	0.422089	0.14089	0.000368694	0.00308171
PAMR1	30.1678	0.451496	0.152097	0.000368967	0.00308171
SYNGR2	28.2732	0.336856	0.107701	0.000378935	0.00315948
SEC61A1	22.7081	0.395473	0.131129	0.000379542	0.00315948
PDHB	20.5408	-0.395114	0.128842	0.000395876	0.00328998
PDLIM3	127.249	0.541219	0.189293	0.000396971	0.00329361
ACTR3	29.4099	-0.389635	0.126713	0.000398208	0.0032984
DSTYK	18.6035	-0.398525	0.12944	0.000400694	0.00331348
PTPRF	13.2186	0.449045	0.153103	0.000401353	0.00331348
ADRM1	24.2955	0.355196	0.114907	0.00040758	0.00335476
MYO9A	16.9422	-0.445175	0.14784	0.000407694	0.00335476
KREMEN2	21.8375	-0.422381	0.140368	0.000412709	0.00339045
LENG1	218.288	-0.249388	0.0765118	0.00041685	0.00341885
DCN	89.8458	0.433245	0.14608	0.000420926	0.00344664
SPRED1	18.9034	-0.509263	0.17438	0.000423908	0.00346538
TTC39A	16.4433	-0.418562	0.138283	0.000428568	0.00349776
XRN2	16.8608	-0.423133	0.140205	0.000429811	0.00350219
NUMA1	31.7333	-0.318587	0.101089	0.000433984	0.00353044
SMARCC1	20.1993	-0.395252	0.129823	0.000435605	0.00353788
GPR141	19.8969	0.413499	0.140422	0.000440914	0.00357519
INTS6L	39.0746	-0.312999	0.099579	0.000444606	0.00359482
SAR1A	21.6118	-0.406945	0.135096	0.000444772	0.00359482
H2BC8	19.7383	0.403915	0.13651	0.000456063	0.00368014
CYP2J2	21.2883	0.350694	0.115447	0.000468395	0.00377356
H4C15	11.8897	0.549738	0.199041	0.000470843	0.00378718
B3GAT3	53.4796	0.284724	0.0897824	0.000477282	0.00383281
RHD	21.587	-0.433511	0.146213	0.000479837	0.00384715
MAP2K7	48.9794	-0.265035	0.0825119	0.000481284	0.00385258
PMF1	12.5635	0.474504	0.167597	0.000485087	0.00387682
PPP5C	28.9447	-0.398166	0.132318	0.00048632	0.00388047
DHX15	21.035	-0.38641	0.127993	0.000488974	0.00389544
RPS6KA4	16.1576	-0.445795	0.152824	0.000523089	0.0041606
RCN3	9.42895	0.47552	0.1701	0.000529528	0.00420513
MMP2	29.7659	0.421076	0.145113	0.00053155	0.00421234
CANX	56.2028	-0.314684	0.101682	0.00053212	0.00421234
KRTAP9-4	24.0577	-0.355154	0.117275	0.000533595	0.00421734
TMEM213	64.7633	-0.288856	0.0928591	0.000537413	0.0042361
FBXO10	19.8355	-0.401216	0.135522	0.000538496	0.0042361
NBPF26	11.9552	-0.532897	0.189522	0.000538509	0.0042361
LYPD1	22.0523	-0.451367	0.15631	0.000541853	0.00425571
PTCD3	29.4071	-0.341555	0.111885	0.00054525	0.00427568
UFM1	29.1635	-0.537652	0.191644	0.000556002	0.00435317
AMOTL1	37.6553	0.326797	0.108612	0.000558471	0.00436567
ITPRID2	104.444	-0.205448	0.0631508	0.000562132	0.00438744
PRDX2	35.7018	0.315512	0.103464	0.000566028	0.00441096
NDUFB3	23.4896	0.353725	0.118209	0.000572357	0.00445335
FBLN2	11.8388	0.443866	0.158489	0.000580072	0.00450637
ALG14	15.5898	-0.49112	0.173546	0.000583111	0.00452295
SMARCB1	16.9389	0.358295	0.121707	0.000590242	0.00457118
DUSP5	18.3981	-0.456799	0.159013	0.000591561	0.00457431
COX4I1	32.3837	0.40556	0.141003	0.000600251	0.00463434
RNH1	25.7549	0.326443	0.109236	0.00061922	0.00477343
NR3C1	19.8375	-0.402639	0.138441	0.000627254	0.00482793
FHL3	13.6738	0.429559	0.15408	0.00063942	0.004914
UCP2	25.8715	0.382407	0.132879	0.000641893	0.00492309
UQCC2	17.2502	0.370475	0.126935	0.00064257	0.00492309
GRIN2A	56.6605	0.360148	0.122823	0.000650305	0.00497412
BMPR2	20.4871	-0.355639	0.119148	0.000651704	0.00497412
OLFM2	12.0432	0.438107	0.158163	0.000652213	0.00497412
SNW1	23.3385	-0.441283	0.155388	0.000657946	0.0050028
C4orf46	118.283	-0.305234	0.101587	0.000657974	0.0050028
ARRB2	25.9476	-0.325448	0.107538	0.000659552	0.00500719
H3C2	11.8667	0.405492	0.142898	0.000666096	0.00504921
SDR39U1	15.0286	0.431412	0.154901	0.000673068	0.00509434
CBX5	30.6454	-0.337428	0.112875	0.000674814	0.00509984
MAGED1	58.6487	-0.315374	0.104631	0.000682351	0.00514902
PRRC2C	17.2597	-0.397353	0.136852	0.000684577	0.00515456
SAP18	37.5083	0.289076	0.0945529	0.000685772	0.00515456
ZNHIT1	26.7727	0.302618	0.100677	0.000686176	0.00515456
TUBAL3	23.6926	-0.344597	0.116003	0.000695606	0.00521084
ATP5MC2	48.8973	0.40059	0.140484	0.000695751	0.00521084
CHMP1A	20.0083	0.337688	0.115298	0.000703899	0.00526399
MLLT3	25.5705	-0.348287	0.11773	0.000706112	0.00527265
ACTL6A	19.0503	-0.443325	0.157353	0.000714594	0.00532163
PARK7	35.6212	0.289611	0.0956762	0.000714798	0.00532163
AGAP1	25.0853	0.333166	0.113736	0.000719271	0.00534697
NOC2L	16.421	0.42116	0.151188	0.000723043	0.00536704
NECAB2	19.5406	-0.392714	0.136019	0.000727833	0.00539459
CAMK2D	31.2912	0.350703	0.121586	0.000737068	0.00544926
OST4	18.9549	0.424476	0.15442	0.000738381	0.00544926
TMEM164	15.3319	-0.420405	0.147782	0.000738476	0.00544926
RAB5B	25.5369	0.317302	0.107244	0.000742118	0.00546806
TMEM11	30.4254	-0.435337	0.155899	0.000745246	0.00547735
C1QTNF3	13.2622	0.423972	0.151928	0.000745918	0.00547735
LAMC1	42.961	-0.281047	0.0918764	0.000746662	0.00547735
CDC34	18.8212	0.344565	0.119	0.00074901	0.00548652
CCDC51	120.717	0.453094	0.165134	0.000758034	0.00554451
RNF24	23.8755	-0.341095	0.11579	0.0007602	0.00555223
LSM4	24.7631	0.29831	0.10004	0.000762334	0.00555971
RNF122	16.6402	0.357233	0.125051	0.000773568	0.00563342
PPP1R9A	23.7887	-0.343601	0.117035	0.000780634	0.0056747
ANAPC7	20.6691	-0.359954	0.123627	0.000781504	0.0056747
FAM193A	19.5625	-0.426756	0.151903	0.000783049	0.00567767
PODN	11.3541	0.478219	0.182357	0.000787761	0.00570358
MYH11	18.6055	-0.450117	0.162427	0.000799522	0.00578036
ANK1	39.366	0.334637	0.115057	0.000802772	0.00579548
TMCO1	20.0978	0.351772	0.122296	0.000805473	0.0058066
MRPS24	21.2997	0.332067	0.114749	0.000810479	0.00583428
DGCR6L	46.7645	0.418017	0.151776	0.000812458	0.00584012
PRRC2B	51.2258	-0.293814	0.0979281	0.000814522	0.00584656
PABPC4	41.7976	-0.301069	0.100708	0.000818786	0.00586875
RHEB	17.4898	0.363993	0.128178	0.000826316	0.00590754
MYOT	55.302	-0.250685	0.0814848	0.00082656	0.00590754
PCDH7	17.582	-0.386788	0.135645	0.000828889	0.00591574
TRIM66	28.0465	-0.356785	0.124555	0.000830737	0.00592048
ZNF3	12.5849	0.398031	0.144439	0.000852083	0.00606397
SEL1L	22.0296	-0.418378	0.149685	0.000858615	0.00610178
ANKRD50	18.7743	-0.39894	0.14166	0.000862072	0.00611766
TMEM14C	18.6786	0.355004	0.125598	0.000863477	0.00611894
MTA3	21.0226	-0.399715	0.142057	0.000864789	0.00611958
HDLBP	40.2199	0.278586	0.0935641	0.000866241	0.00612119
TWSG1	22.0759	-0.342978	0.118298	0.000879456	0.00620581
TMBIM6	22.5744	0.317428	0.109853	0.000883454	0.00622524
SLFNL1	50.8548	-0.257103	0.0847024	0.000889167	0.00625668
C10orf71	13.3067	0.435316	0.162373	0.000891046	0.0062611
TRIR	19.9248	0.338401	0.118659	0.000902061	0.00632961
CCNI	45.6686	0.279612	0.0937059	0.000909529	0.00637305
EZR	30.0806	0.354223	0.125048	0.0009108	0.00637305
MICOS13	17.1503	0.352405	0.125485	0.000936039	0.0065405
GSN	38.6829	0.411718	0.152297	0.000940047	0.00655935
SPARC	224.248	0.321068	0.111224	0.000948251	0.00660738
SCARF2	20.7591	-0.415774	0.150804	0.000950323	0.00661261
MEPCE	97.0183	-0.325221	0.114001	0.000960013	0.00666362
ZNF799	23.5512	-0.415433	0.150715	0.000961018	0.00666362
PDGFRA	21.3568	-0.40449	0.147199	0.00096165	0.00666362
PKD2	18.0385	-0.409098	0.147674	0.000978925	0.00677395
HSP90AB1	135.847	-0.291247	0.099593	0.00098254	0.00678957
ADAMTS1	16.1923	0.419065	0.156908	0.000985907	0.00680344
JPH4	88.2305	-0.251196	0.0833992	0.000998377	0.00687241
DDX58	29.8631	-0.561433	0.221789	0.000998649	0.00687241
TP53RK	25.3401	-0.342869	0.121301	0.00101482	0.0069741
WDR46	18.1623	0.347951	0.12485	0.0010238	0.00702613
SELENON	13.3172	0.393166	0.146098	0.00103218	0.00707397
PTPRA	22.0046	-0.456822	0.173764	0.00105836	0.00724346
CSGALNACT2	20.2972	-0.428338	0.160987	0.00106982	0.0073119
MAGEA3	93.8762	-0.259733	0.0882111	0.00107778	0.00735629
GLUD1	20.3864	0.329012	0.117254	0.00108064	0.00736576
ZNF836	22.5757	-0.425872	0.15939	0.00111132	0.00756452
SPRR2F	9.35913	0.499549	0.199353	0.00111396	0.00757219
RNF181	51.3651	0.458097	0.177566	0.00113757	0.00772219
IMPA2	9.64569	0.448211	0.175092	0.00114063	0.00772467
SORBS1	25.2446	-0.360265	0.130032	0.00114102	0.00772467
SPTBN1	65.1826	-0.263188	0.0893747	0.00114702	0.00775477
RBM4	13.7036	0.468792	0.185594	0.00115056	0.00776821
VPS16	9.11966	0.433018	0.167833	0.00116034	0.00782369
VAPA	20.2286	-0.361154	0.130168	0.00117441	0.0079034
JSRP1	14.8759	0.398616	0.150394	0.00117532	0.0079034
POLE4	15.3683	0.361839	0.133851	0.00118431	0.00795315
PARVA	21.6887	0.30562	0.108253	0.00118944	0.00797687
DKK3	16.546	0.425813	0.164798	0.00119341	0.00799284
RASSF4	24.9982	-0.381394	0.141205	0.001206	0.00806635
GPX3	14.4313	0.427633	0.164358	0.00121479	0.0081143
ZNF530	15.5838	0.397797	0.151969	0.00122075	0.00814319
CD33	29.3856	-0.372014	0.138619	0.00123322	0.00821543
NCOA1	35.3578	-0.330123	0.117837	0.00124368	0.00827413
DDX19A	26.9212	-0.348993	0.126033	0.00124584	0.00827746
PEBP1	20.1241	0.348809	0.127959	0.00125022	0.00829558
HAS2	18.9213	-0.465573	0.181215	0.00126013	0.00835023
MRGPRX4	18.308	-0.430295	0.16528	0.001272	0.00841775
LGALS3BP	11.0212	0.591664	0.256826	0.00127808	0.0084468
GNAI2	29.2629	0.272532	0.0947737	0.00128054	0.00845193
MLLT11	41.0807	0.421954	0.163165	0.00129002	0.00850329
PPP1R14B	38.7485	0.320473	0.116156	0.00130825	0.0086121
NID1	17.7594	-0.373168	0.137546	0.00131662	0.00865398
FGF17	13.5802	-0.431314	0.164934	0.00132009	0.00865398
TRIP11	20.3081	-0.400524	0.149795	0.00132092	0.00865398
ZMIZ1	26.2176	0.301264	0.107238	0.00132154	0.00865398
GIT2	36.0477	-0.301713	0.106719	0.00132646	0.00867488
CENPK	16.6001	-0.481629	0.189253	0.00133846	0.00874194
COQ10A	15.0152	0.361953	0.135646	0.00135194	0.00881847
CDC14B	19.0851	-0.392187	0.14716	0.00136659	0.00890242
SHARPIN	9.97962	0.409221	0.160189	0.00137969	0.00897608
MRPS26	13.0237	0.382531	0.146537	0.00138153	0.00897638
SCAF1	16.1839	0.36579	0.138304	0.0013917	0.00903068
C4orf3	32.6331	0.280698	0.0993788	0.0014059	0.00911103
ALKBH2	20.621	-0.409057	0.157323	0.00141609	0.00916517
CXCR2	12.2593	-0.413393	0.157066	0.0014408	0.00931307
CGGBP1	17.8884	-0.353407	0.130225	0.00145591	0.00939861
SORBS2	13.3168	-0.410145	0.156562	0.00148775	0.00959178
BEX4	22.6959	-0.367224	0.137384	0.00149303	0.00961141
WNT10A	23.833	-0.328225	0.120193	0.00149464	0.00961141
ANO7	31.086	-0.306046	0.110093	0.00149905	0.0096274
GATD3A	15.7369	0.391362	0.153134	0.00151055	0.00968885
RHOV	66.4255	0.33821	0.126126	0.00151667	0.00971562
RPS21	26.9645	0.40549	0.159382	0.00154993	0.00991597
C1orf116	8.4759	0.433553	0.175693	0.00156104	0.00997434
KLF6	15.6608	0.386788	0.150483	0.00156353	0.00997747
TXNL4A	17.121	0.344878	0.130365	0.00159018	0.0101346
UBALD1	17.3782	0.382471	0.149406	0.00159865	0.0101756
ADARB2	20.0937	-0.512538	0.214245	0.00160727	0.0102175
ANTXR2	29.5461	-0.317261	0.1166	0.00161804	0.0102729
CTNNB1	37.0932	-0.29467	0.10628	0.00163849	0.0103887
SRPK3	45.2029	0.379829	0.148142	0.00164042	0.0103887
PSG11	25.9301	-0.340474	0.12656	0.00164817	0.0104234
ZNF669	35.1999	-0.314858	0.116454	0.00165008	0.0104234
TRMT112	23.4838	0.29945	0.109826	0.00165512	0.0104421
SERPINA7	32.5976	-0.30142	0.110055	0.00166872	0.0105146
TIA1	18.1718	-0.352415	0.132419	0.00167655	0.0105506
SLC37A3	24.725	-0.401057	0.156529	0.00168296	0.0105777
HSPA1A	20.103	0.310512	0.115426	0.00169478	0.0106386
RPS27L	22.4784	0.307525	0.113525	0.00171199	0.0107267
CCL8	18.4413	-0.374174	0.143839	0.0017131	0.0107267
PEAK1	39.6845	-0.457041	0.186732	0.00171943	0.0107529
EVC2	15.1053	-0.38874	0.150115	0.00172644	0.0107778
TBC1D1	20.223	-0.396631	0.153496	0.00172773	0.0107778
ZNF844	17.7717	-0.358592	0.135831	0.00173988	0.0108307
DUSP13	15.7649	0.357199	0.138832	0.00174053	0.0108307
UBTD1	17.621	0.331813	0.125815	0.00174289	0.0108319
MYBPC1	195.878	-0.354458	0.136742	0.00175804	0.0109125
CNTRL	14.2274	-0.414297	0.164257	0.0017874	0.011081
LY6G5B	18.3095	-0.369592	0.140861	0.00179273	0.0111003
TOP2A	11.1168	-0.440922	0.176781	0.00183209	0.0113219
EDF1	42.1079	0.238423	0.084185	0.00183474	0.0113219
FAM118B	10.1986	0.398071	0.161073	0.00183532	0.0113219
GOLGA5	16.6616	-0.458458	0.186777	0.00184871	0.0113905
HSPA4	26.9957	-0.291552	0.106365	0.00187821	0.0115581
UQCRHL	39.6825	0.318888	0.119479	0.00188062	0.0115587
RPL32	119.394	0.332725	0.125084	0.00189966	0.0116614
FAM120A	16.8868	0.331168	0.127225	0.00190677	0.0116907
KRTAP12-3	12.7783	0.400596	0.162712	0.00195932	0.0119981
SNU13	18.4314	0.312879	0.118728	0.00199751	0.0122171
RSRC2	17.5455	0.357435	0.140894	0.00200517	0.0122489
HECTD4	28.2722	-0.290979	0.107216	0.00201171	0.0122739
HIGD1A	17.4455	0.315144	0.120474	0.00202086	0.0123147
ERMARD	15.5923	-0.484994	0.206755	0.00202715	0.012338
CDC42EP1	16.4302	0.414532	0.172473	0.00203255	0.0123558
DES	163.689	0.438387	0.182999	0.00204139	0.0123919
CYC1	20.3986	0.329367	0.127731	0.00204343	0.0123919
SSRP1	38.1683	-0.27123	0.0991701	0.00205342	0.0124374
CHRNA1	90.6741	-0.398138	0.161153	0.00206327	0.0124684
CDK7	12.0469	-0.406099	0.161966	0.00206353	0.0124684
FAM53B	16.7331	0.329142	0.127398	0.00208212	0.0125656
CD99	24.9286	0.375295	0.15185	0.00210957	0.0127159
RASAL3	22.4623	-0.376695	0.150248	0.00214065	0.0128814
OBSCN	20.4276	0.430441	0.18367	0.00214217	0.0128814
NDUFA3	16.0753	0.348494	0.138688	0.00217568	0.0130671
CAPN2	18.7362	0.341431	0.135036	0.00219827	0.013187
CDC123	12.0515	0.3617	0.146182	0.00223365	0.0133832
HLA-G	19.9021	-0.435763	0.180611	0.00224741	0.0134495
HCK	34.5336	-0.383098	0.154599	0.00226475	0.0135371
CHST12	10.4651	0.375703	0.154577	0.00231308	0.0138095
SCAMP2	19.9242	0.325815	0.128197	0.00232297	0.013852
MYH7B	50.7597	0.422312	0.181531	0.00234748	0.0139815
GTF2H2C	15.9224	-0.356453	0.140389	0.00235177	0.0139904
RAPSN	33.6379	-0.299919	0.114336	0.00236081	0.0140115
C6	17.2098	-0.359013	0.142769	0.00236092	0.0140115
SNAI3	17.8669	-0.433431	0.180919	0.00238234	0.0141218
SNN	16.3939	0.321282	0.126509	0.00238563	0.0141246
ALOX15	13.2084	0.352262	0.142789	0.00239916	0.014188
RHBDF1	16.9498	0.328572	0.130482	0.00240662	0.0142153
RIPK2	17.7734	-0.526303	0.237665	0.00242304	0.0142941
SGK1	20.0926	0.306131	0.118972	0.00242569	0.0142941
STAT6	18.293	0.324188	0.127317	0.00243749	0.0143468
LRRC3B	12.2485	-0.438863	0.184553	0.00246462	0.0144894
ATP1A1	35.2809	-0.354291	0.14342	0.00247083	0.0145076
NF2	17.7616	0.306317	0.11932	0.00247851	0.0145076
TNKS2	17.0855	-0.337157	0.131964	0.00247901	0.0145076
DNM2	47.3774	-0.304412	0.118151	0.00247931	0.0145076
NPM2	20.8647	-0.479771	0.210158	0.00249014	0.0145539
DDX17	110.403	-0.252546	0.0935706	0.00250933	0.014649
MIDN	25.4203	0.336764	0.13601	0.0025488	0.0148478
PLAGL1	31.9396	0.328637	0.130899	0.00254933	0.0148478
ACVR2A	15.0006	-0.373519	0.152049	0.00259282	0.0150836
C9orf43	18.5803	-0.439033	0.188508	0.00260938	0.0151623
CXXC1	11.9302	0.365441	0.153005	0.00269083	0.0156174
MYOM2	36.4286	-0.40637	0.174519	0.00269574	0.0156278
RAB39A	26.8232	-0.286775	0.109608	0.00270361	0.0156553
SUPT5H	26.2423	-0.328102	0.129949	0.00272968	0.015782
NDUFB2	24.4296	0.326562	0.131701	0.0027318	0.015782
NUBP2	19.6718	0.295745	0.115924	0.00274565	0.0158392
GATA2	37.3347	-0.266575	0.10054	0.00274807	0.0158392
LTBP3	23.4653	0.332577	0.135558	0.00275119	0.0158392
KIR3DL1	23.6955	-0.299638	0.115982	0.00276364	0.0158866
GGA2	22.7691	-0.305311	0.118846	0.00276696	0.0158866
SRP9	20.9536	0.289008	0.112828	0.00276897	0.0158866
DUSP10	25.5946	0.291206	0.113465	0.00277742	0.0159162
COIL	12.4979	0.422731	0.187645	0.00278048	0.0159162
PRIMPOL	20.4492	-0.328943	0.13072	0.0028099	0.0160662
FXYD1	16.1697	0.426065	0.18992	0.00281387	0.0160706
PRAC1	20.3908	-0.348382	0.141735	0.00281719	0.0160712
LHFPL6	21.1629	0.320736	0.128923	0.00283997	0.0161827
CCDC112	26.9504	0.297731	0.117155	0.00288865	0.0164389
TPM4	21.6588	0.301919	0.119074	0.00289152	0.0164389
NKIRAS2	11.26	0.371765	0.157583	0.00291089	0.0165014
ZNF703	21.4303	0.288409	0.113451	0.00291212	0.0165014
MTPAP	24.7427	-0.301138	0.117481	0.00291241	0.0165014
PPP3R1	28.7467	0.266279	0.101985	0.00295115	0.0167021
MEX3D	13.1246	0.336343	0.13917	0.00296505	0.0167617
ECH1	20.7992	0.339656	0.14077	0.00299446	0.0168932
ACBD6	20.2505	-0.379223	0.158533	0.00299506	0.0168932
MAP4K4	34.9354	-0.292832	0.115583	0.00299908	0.0168969
FAM126B	13.3985	-0.418369	0.181803	0.00304616	0.0171326
DSCAM	18.3491	-0.32159	0.128008	0.00304777	0.0171326
PRPF19	16.4555	0.324575	0.132947	0.00307751	0.0172803
LARP4B	20.5994	-0.321527	0.129225	0.0031104	0.0174454
APOO	49.0152	-0.235126	0.0883886	0.00314473	0.0176086
LRTM1	22.886	0.296158	0.118393	0.00314653	0.0176086
PRDM4	12.1621	-0.382384	0.160072	0.00315727	0.017649
SLC2A9	12.463	-0.366549	0.151733	0.00316864	0.0176928
RBM5	24.6651	-0.316241	0.127523	0.00319225	0.0178047
RNASEH2C	10.746	0.370046	0.161273	0.00323122	0.018002
NBN	12.8661	0.3414	0.144081	0.00324151	0.0180199
P4HB	36.9809	0.263902	0.10276	0.00324163	0.0180199
BBS2	18.4823	-0.32039	0.129267	0.00325974	0.0180971
RNF227	14.1791	0.332982	0.138504	0.00326276	0.0180971
RB1CC1	18.6945	-0.352943	0.146249	0.00326654	0.018098
WWTR1	22.5658	-0.366923	0.155415	0.00328232	0.0181424
PHB2	14.8718	0.368291	0.160278	0.00328383	0.0181424
CHD8	20.2499	-0.334614	0.137298	0.00328543	0.0181424
PDZRN3	29.2176	-0.303803	0.120923	0.00328933	0.0181439
GAL3ST2	96.6588	-0.219176	0.0816454	0.00330563	0.0182137
SHROOM3	15.7262	-0.348838	0.143713	0.0033107	0.0182216
ELF2	13.3582	0.339392	0.143525	0.00333602	0.0183408
CCDC189	29.5354	-0.30067	0.120035	0.00336626	0.0184867
CCDC86	30.3011	-0.412399	0.182936	0.00337735	0.0185273
LAMP2	21.1203	-0.333652	0.136942	0.00341082	0.0186904
UQCRQ	26.8722	0.34004	0.143448	0.00342995	0.0187703
MAP2K5	21.7327	-0.308073	0.124192	0.00343291	0.0187703
SLC36A1	19.0419	0.3063	0.125994	0.00346395	0.0189194
MRPS34	24.8746	0.273434	0.107835	0.00347348	0.0189507
ZMYM4	23.8834	-0.320482	0.130332	0.00351417	0.0191519
UQCRB	31.472	0.306983	0.124578	0.0035341	0.0192395
MYLPF	384.864	0.334122	0.139622	0.00357281	0.0194291
NUDCD1	8.42312	0.392198	0.177988	0.00358977	0.0195001
TRAK1	59.9023	0.249175	0.0968934	0.00364646	0.0197866
MRPS21	17.7149	0.300707	0.122857	0.00366458	0.0198634
DLGAP4	37.3875	0.226599	0.0867245	0.00369523	0.0199908
COX7B	28.606	0.300909	0.122221	0.00369608	0.0199908
BABAM1	14.4445	0.336704	0.143762	0.00370605	0.0200231
AKAP13	31.7714	-0.264229	0.103686	0.00372434	0.0200787
OTOF	10.947	0.362358	0.159364	0.00372436	0.0200787
STEAP2	17.0219	-0.429589	0.196274	0.00376318	0.0202661
SPPL3	22.5727	-0.286614	0.114198	0.00377504	0.0203081
COX6B1	43.3213	0.291552	0.117712	0.00378588	0.0203445
GNA15	83.5966	-0.345	0.150143	0.00380954	0.0204497
HMBOX1	22.1958	-0.300419	0.122076	0.00383425	0.0205603
MCRIP1	20.9079	0.288679	0.11839	0.00387642	0.0207642
STRIT1	27.2941	0.369235	0.162179	0.00388715	0.020799
PHLDA3	19.095	0.321237	0.136891	0.00389124	0.020799
BAG3	38.9906	0.254946	0.100401	0.0039106	0.0208599
CLIC4	26.5587	0.271587	0.108569	0.00391097	0.0208599
GNG5	10.5924	0.373618	0.168411	0.00392773	0.020927
RPS15A	27.6138	0.381176	0.170287	0.00394097	0.0209752
RPSA	52.5389	0.255722	0.100121	0.00395584	0.0210319
INTS6	26.9646	-0.307315	0.126367	0.00400582	0.0212751
DHRSX	24.5175	-0.328643	0.138597	0.00404009	0.0214343
COL6A1	124.522	0.36502	0.161251	0.00406849	0.0215618
PIGM	12.6961	0.332871	0.144094	0.00407274	0.0215618
DHX8	17.1877	-0.349814	0.149895	0.00412776	0.02183
ANGPTL1	21.4688	0.297223	0.124157	0.00413546	0.0218443
PTGES2	12.9987	0.328205	0.142417	0.0041392	0.0218443
NES	84.8265	-0.463604	0.231219	0.00418067	0.02204
PRSS23	12.1238	0.351263	0.156958	0.00422525	0.0222515
ZNF721	21.6599	-0.28893	0.117649	0.00423428	0.0222562
PON3	13.5505	-0.400161	0.181314	0.00423707	0.0222562
GPR87	31.8633	-0.296919	0.122478	0.00423948	0.0222562
AHDC1	29.7165	0.293743	0.123036	0.00424688	0.0222716
AKAP12	18.3468	-0.356967	0.155504	0.00427867	0.0224148
ZNF117	14.8907	-0.339059	0.144996	0.00429057	0.0224537
TANC2	13.8443	-0.351257	0.151993	0.00429617	0.0224595
SS18	21.8959	-0.282793	0.114815	0.00430482	0.0224788
NUTF2	26.7157	0.303543	0.127609	0.00431424	0.0224788
PREX2	17.8345	-0.305729	0.126658	0.00431765	0.0224788
IGFL3	8.94216	0.363733	0.165563	0.00431784	0.0224788
GHITM	29.3754	0.285796	0.118254	0.00433728	0.0225498
TATDN1	18.1328	0.310034	0.132318	0.0043405	0.0225498
RASA4	14.4151	-0.331516	0.141495	0.0044626	0.0231601
BRWD1	18.5192	0.30885	0.132774	0.00448714	0.0232634
BSDC1	20.3078	0.292288	0.123054	0.00453602	0.0234842
FAM228B	17.6534	-0.313575	0.132481	0.00453913	0.0234842
ALG2	21.5121	0.37636	0.173188	0.00455278	0.0235305
ZFHX4	20.3795	-0.313373	0.132587	0.00456153	0.0235388
TPI1	125.492	0.279415	0.115047	0.00456379	0.0235388
LDB3	119.735	0.327225	0.141686	0.00458637	0.0236309
PFDN5	25.7087	0.320502	0.140258	0.00459674	0.02366
KPNB1	32.892	-0.244651	0.0971844	0.00462184	0.0237647
TUSC2	156.023	-0.223735	0.0880884	0.00464564	0.0238626
POLR2E	51.2723	-0.20939	0.0806452	0.00465782	0.0239006
SPEN	13.7585	-0.356676	0.157911	0.00466784	0.0239275
NDUFAF3	15.8908	0.298972	0.128097	0.00469951	0.0240652
MDH1	38.978	-0.336304	0.148387	0.0047335	0.0242144
SYTL5	28.7347	-0.313467	0.134828	0.00476383	0.024341
ETNPPL	16.5291	-0.347335	0.153072	0.00476798	0.024341
ABCF2	20.0305	-0.28641	0.118523	0.00477289	0.0243413
CTNNBL1	20.5751	-0.287292	0.119233	0.00478638	0.0243698
ATP2B1	30.7976	-0.266097	0.10825	0.00478823	0.0243698
BRK1	23.8663	0.256783	0.105054	0.00480384	0.0244244
SOX12	18.2366	0.297327	0.127487	0.00482278	0.0244958
SPINT2	11.5407	0.326759	0.145136	0.00483406	0.0245282
H1-5	15.7283	0.377499	0.173467	0.00485192	0.0245825
MYLK3	18.0416	0.301927	0.130635	0.00485459	0.0245825
DOCK5	23.236	-0.375854	0.170868	0.00487191	0.0246453
ZNF136	14.9278	-0.407959	0.191584	0.00492986	0.0249132
PHACTR2	15.6155	0.298275	0.128823	0.00495222	0.0250009
GNPTG	9.87319	0.365078	0.17072	0.00496655	0.025048
PTP4A1	25.9719	0.284919	0.120835	0.00497345	0.0250485
IGFBP5	72.7502	-0.272415	0.11395	0.00497942	0.0250485
NBPF6	10.2039	0.360789	0.169277	0.00498166	0.0250485
AMELX	21.7013	-0.344357	0.15213	0.00499386	0.0250846
COMMD4	14.7527	0.312637	0.137788	0.00502786	0.0252301
TNFRSF13C	14.6303	0.381639	0.182193	0.00504476	0.0252895
H3C10	12.1294	0.343723	0.156563	0.00506482	0.0253646
LMOD2	30.999	0.280117	0.118204	0.00507923	0.0254114
POTEG	37.8441	-0.257001	0.105045	0.00512948	0.0256371
EPB41L4B	14.5914	-0.340822	0.150895	0.0051771	0.0258493
PIAS2	23.7425	0.262732	0.109695	0.00519028	0.0258893
FNDC3B	40.1433	-0.247797	0.100868	0.00523422	0.0260825
TMEM209	21.9601	-0.283775	0.119177	0.00524945	0.0261092
CDKN1A	115.567	0.280446	0.118144	0.00525002	0.0261092
ST6GALNAC3	14.9018	-0.322889	0.140556	0.00526404	0.0261529
CNN3	47.2829	-0.237225	0.0955001	0.00527227	0.0261678
GPKOW	28.7638	-0.303434	0.131198	0.00528165	0.0261884
CKAP5	13.7234	-0.342245	0.152229	0.0052908	0.0262078
AP5S1	15.731	0.303118	0.133065	0.00532791	0.0263346
MARVELD1	14.4101	0.306868	0.135821	0.0053284	0.0263346
RAN	35.168	0.256579	0.1068	0.00533219	0.0263346
MEOX2	20.8027	0.27526	0.117473	0.0054618	0.0269481
TOX4	24.1998	-0.261067	0.10785	0.0054828	0.0270158
PAOX	18.2201	-0.298742	0.128108	0.00548633	0.0270158
ZNF579	14.0399	0.317596	0.144051	0.00553886	0.0272477
CBX6	22.3261	0.271584	0.115736	0.00555883	0.0273191
ACTR2	17.3448	0.284138	0.122951	0.00557627	0.0273779
UBE2NL	16.9866	0.291863	0.127193	0.0055943	0.0274395
MAST1	17.7798	-0.345067	0.157661	0.00562103	0.0275436
NIPBL	14.8171	-0.321741	0.141418	0.00563966	0.0275939
VAT1	12.9721	0.31747	0.143859	0.00564233	0.0275939
LRP4	23.588	-0.270889	0.114004	0.00565301	0.0276192
RPS6KB1	43.1267	-0.235682	0.0962053	0.00566914	0.0276709
MICU3	11.6307	-0.356257	0.162748	0.005689	0.0277408
IL6ST	15.3364	0.308566	0.138917	0.0057982	0.0282457
PAX6	16.6831	-0.352455	0.16315	0.00584969	0.0284544
ADNP	27.087	-0.250155	0.103533	0.00585241	0.0284544
TNIK	20.7341	-0.293023	0.127648	0.00596043	0.0289443
CDR2	28.4694	-0.257896	0.107938	0.00596473	0.0289443
POLR2J2	13.3142	0.323271	0.150098	0.00598388	0.0290091
SERBP1	80.8936	0.227895	0.0936584	0.00601508	0.0291232
SAFB	22.0455	-0.292252	0.126815	0.00601906	0.0291232
SMIM23	14.8239	0.316072	0.143957	0.00603143	0.0291548
H2AC1	20.2169	-0.281042	0.120416	0.00604732	0.0292034
PNRC1	34.3997	0.225472	0.0922037	0.00606443	0.0292578
PCDH11X	24.7159	-0.317918	0.142477	0.00608762	0.0293414
UPK3BL1	34.5551	-0.236069	0.097206	0.00611239	0.0294324
CACNA1S	41.1298	-0.263948	0.112745	0.00613366	0.0295064
THRAP3	32.9753	-0.236541	0.0973052	0.00614761	0.0295451
RARA	19.1526	0.271239	0.117966	0.00617134	0.0296307
ADGRA3	20.7387	-0.272012	0.116184	0.00624975	0.029954
ARMCX2	20.1125	-0.278032	0.119239	0.00625065	0.029954
TEX2	17.4607	-0.339297	0.156264	0.00628363	0.0300451
AP2S1	16.9402	0.435501	0.238928	0.00628604	0.0300451
PRRC1	30.5768	-0.240842	0.0999495	0.00629054	0.0300451
CFDP1	58.5299	-0.216461	0.0881272	0.00629367	0.0300451
H3-4	11.9649	0.348855	0.168679	0.00633125	0.0301957
EIF1B	14.3295	0.293644	0.131999	0.00641362	0.0305328
GSTM3	18.5309	-0.300208	0.132827	0.00641588	0.0305328
MBP	22.9792	0.316038	0.145313	0.00642025	0.0305328
KDM5C	27.1032	-0.279041	0.12104	0.00643202	0.0305597
LOXL1	23.1819	-0.314888	0.142345	0.00646025	0.0306647
PTGS1	10.5638	0.336223	0.161354	0.00650648	0.0308549
WSB1	20.4059	-0.323818	0.149858	0.00652412	0.0308975
DGKZ	14.768	0.378762	0.194077	0.00653088	0.0308975
PDS5B	24.1508	-0.320214	0.144315	0.00653399	0.0308975
THOC1	17.4672	-0.297399	0.131938	0.00660606	0.0312088
CBL	28.9655	-0.248475	0.104942	0.00662314	0.03126
CAP2	41.4867	-0.212593	0.0865193	0.00664552	0.0313164
AEBP2	22.9921	-0.274705	0.119158	0.00665179	0.0313164
H1-2	22.7085	0.309403	0.14215	0.00665388	0.0313164
AVEN	18.234	-0.282852	0.123426	0.00669288	0.0314704
H1-4	14.1936	0.334629	0.158027	0.00670305	0.031478
TRIM41	14.5288	-0.314816	0.142363	0.0067103	0.031478
SLC16A12	14.3358	-0.328009	0.150709	0.00671337	0.031478
GART	21.3662	-0.332258	0.153711	0.00677747	0.0317488
RNF144A	12.0555	0.313108	0.146333	0.00682078	0.0319217
ATP5ME	24.1042	0.241137	0.102638	0.00684685	0.0320138
PCGF1	17.4671	0.27306	0.121063	0.00685943	0.0320427
PTGFRN	17.6475	0.343942	0.167422	0.00689512	0.0321794
GADD45GIP1	15.3055	0.283755	0.127728	0.00693857	0.0323228
OR7A10	14.7424	0.304759	0.140145	0.00694184	0.0323228
SSC4D	16.7529	-0.317314	0.145824	0.00694524	0.0323228
COL5A3	19.3242	0.326049	0.155455	0.00697012	0.0323821
MATN2	30.2393	0.250955	0.107958	0.00697093	0.0323821
HR	10.1907	0.370435	0.190769	0.00702339	0.0325955
NSMF	10.8771	0.337412	0.165195	0.0070439	0.0326604
SFRP4	60.4752	0.297678	0.134858	0.007081	0.0328021
TMED9	17.7378	0.277106	0.124083	0.00710974	0.0329047
PDCD6IP	16.8779	-0.294155	0.131625	0.00713754	0.0330029
GSE1	18.892	-0.292142	0.13015	0.00715	0.0330146
DESI1	12.617	0.314997	0.148278	0.00715328	0.0330146
TLR3	15.5286	-0.415371	0.221664	0.00716108	0.0330202
CYREN	13.9728	0.297713	0.13798	0.00721066	0.0332095
EPB41L3	25.1533	-0.270264	0.118402	0.00721545	0.0332095
CHCHD3	20.6283	0.255028	0.11152	0.00722206	0.0332095
MYRF	9.65627	0.381289	0.20201	0.00735505	0.03379
TMEM258	17.4724	0.280851	0.126582	0.00736732	0.0338153
BBLN	28.6572	0.226525	0.0958166	0.00738357	0.0338589
NOP10	15.582	0.277346	0.125493	0.00743253	0.0339879
PDHA1	30.8228	-0.268622	0.117431	0.00743386	0.0339879
CACNG1	26.056	0.25539	0.112133	0.0074363	0.0339879
NUCB1	31.6513	0.222341	0.0937273	0.00743889	0.0339879
ACBD3	18.2843	-0.282771	0.125578	0.00744615	0.03399
TET2	17.9386	-0.299009	0.135415	0.00745885	0.034017
STARD7	26.0185	-0.264764	0.11579	0.00747081	0.0340405
NNMT	36.3845	-0.405153	0.213568	0.00748283	0.0340578
BOC	28.7831	0.286995	0.131199	0.00748821	0.0340578
HIC1	17.4638	0.278726	0.126738	0.00756002	0.0343531
CALU	34.1243	-0.237286	0.101288	0.00757446	0.0343875
HMCN2	21.3912	0.302096	0.142255	0.00759513	0.0344501
ACVR1	22.3515	-0.341351	0.164647	0.00763815	0.0346138
PLXND1	12.3125	-0.352176	0.171947	0.00765632	0.0346648
COX20	19.4352	0.257463	0.113471	0.00767825	0.0347326
GAB2	22.8937	-0.34401	0.16791	0.00784653	0.0354386
ABLIM3	23.8799	-0.26748	0.118912	0.00784849	0.0354386
CEACAM5	25.7115	-0.324939	0.154013	0.00786485	0.035457
HDGFL3	17.4946	-0.318172	0.149546	0.00786674	0.035457
TUBB2A	46.5883	0.278635	0.126466	0.0079545	0.0358203
ABHD17A	17.6463	0.274574	0.12512	0.00800192	0.0360014
NCK1	152.287	-0.313605	0.15169	0.00805104	0.0361664
APPBP2	19.554	-0.278982	0.125601	0.00805305	0.0361664
MED13	44.8528	-0.28896	0.132512	0.0080686	0.0362038
VEGFB	18.9617	0.255459	0.11438	0.00815491	0.0365583
ZNF580	10.487	0.323609	0.1605	0.00818843	0.0366756
HSPB7	33.2889	0.317073	0.155032	0.00819584	0.036676
DNAJC8	12.3521	0.315844	0.153941	0.00821591	0.036733
TMEM132A	20.8627	0.289314	0.136321	0.00823864	0.0367803
TMTC1	11.7413	-0.340164	0.165779	0.00824119	0.0367803
RBM14	16.4368	0.301294	0.14403	0.00825242	0.0367976
IRAK1	15.7646	0.281269	0.130141	0.00829329	0.0369469
IFFO1	17.954	0.382629	0.204816	0.00830647	0.0369727
BUB3	23.4808	0.261703	0.118396	0.00832644	0.0370286
ATP5PF	41.1746	0.22329	0.0952278	0.00837042	0.0371911
NRK	18.6398	-0.276481	0.125056	0.00838455	0.0372209
PKD1	26.1347	0.245852	0.10936	0.00841751	0.037334
ACOT1	15.2028	0.285007	0.13362	0.00845555	0.0374645
PLPP1	34.8606	-0.351217	0.178413	0.00846191	0.0374645
GPAA1	18.925	0.269786	0.124395	0.00849816	0.0375918
WIF1	21.9646	-0.361829	0.187763	0.00857461	0.0378964
C1S	23.6661	-0.293151	0.136322	0.00858508	0.0379092
MUC5AC	15.8098	0.275122	0.128092	0.00862765	0.0380636
LSM14A	12.927	0.299271	0.144839	0.0086636	0.0381885
ELAVL4	15.9049	-0.368532	0.188267	0.00869329	0.0382857
ANKRD10	22.5505	0.326998	0.163403	0.00870667	0.0383109
SMAD2	21.673	-0.306006	0.145006	0.00871586	0.0383176
OSBPL6	12.1496	0.309813	0.152589	0.00879591	0.0386356
APC2	7.96399	0.342711	0.178672	0.00883578	0.0387767
RHOBTB3	21.0145	-0.280162	0.129108	0.00884691	0.0387915
UBE4B	20.8732	-0.293915	0.137834	0.00886337	0.0388296
TRIM51	47.3786	-0.190971	0.0795348	0.00887446	0.0388442
YPEL2	13.1543	0.317844	0.159378	0.00890676	0.0389515
IGHG4	52.9756	-0.200587	0.0843409	0.00891782	0.0389535
SUGP2	28.8867	-0.318473	0.155214	0.00892278	0.0389535
STUB1	14.033	0.314741	0.15655	0.00893911	0.0389907
WDFY2	15.8016	-0.288679	0.133908	0.00896852	0.0390849
PCM1	34.604	-0.231978	0.101684	0.00914101	0.0397704
CENPT	21.2191	0.255078	0.116457	0.00914171	0.0397704
ATP2A3	25.8915	-0.306327	0.149684	0.00919518	0.0399683
C5orf15	17.9341	-0.294109	0.138761	0.00921487	0.0399959
CCND2	49.0317	0.225926	0.0983664	0.00921753	0.0399959
TNFRSF12A	20.1118	0.249578	0.113384	0.00924726	0.0400902
CNOT3	22.1703	-0.287445	0.134647	0.00931842	0.0403637
RPS26	26.9408	0.385541	0.216009	0.00934735	0.040454
GAS8	21.4158	-0.292604	0.138613	0.00937317	0.0405307
MRPL21	18.4571	0.256926	0.117469	0.00938348	0.0405402
NCBP2	29.9102	-0.260434	0.119747	0.00943144	0.0407111
CSKMT	9.47623	0.315101	0.159426	0.00943932	0.0407111
ZNF529	24.1925	-0.254306	0.114885	0.00947335	0.0408227
NDUFB7	19.6577	0.287046	0.13735	0.0094843	0.0408347
PET117	32.4915	-0.227016	0.0992234	0.00950397	0.0408842
TPM2	436.418	0.303619	0.14814	0.00952409	0.0409356
PNPLA2	39.8483	0.223457	0.0982173	0.00956665	0.0410832
PPIB	21.4596	0.260366	0.121362	0.00959645	0.0411758
NPNT	62.2645	-0.260954	0.119327	0.00966677	0.041442
ARHGEF2	17.6616	-0.350493	0.18741	0.00970022	0.0415498
CTBP1	19.5441	0.275355	0.131129	0.00976782	0.0418036
SMARCA1	18.1928	-0.291955	0.139744	0.009843	0.0420597
KANK3	26.8143	-0.248029	0.111986	0.00984447	0.0420597
INSYN2B	23.0632	0.236227	0.106358	0.00986614	0.0420895
SCARA3	18.583	0.259401	0.12079	0.00986827	0.0420895
DICER1	13.0958	-0.318575	0.157259	0.00990174	0.0421963
EP300	13.3719	-0.314061	0.15458	0.00996464	0.0424282
OCIAD1	42.1185	0.208295	0.0905128	0.00999618	0.0425263
AKR1E2	26.4832	-0.242924	0.109377	0.0100101	0.0425495
ASAP1	18.2695	-0.273946	0.128061	0.0100253	0.0425777
ALKBH5	23.6969	0.244834	0.11236	0.0100452	0.0425977
SERP1	22.0974	-0.281183	0.13357	0.010047	0.0425977
SIGMAR1	59.4912	-0.195239	0.0840051	0.0100747	0.0426287
HLA-E	17.079	0.30903	0.156002	0.0100756	0.0426287
OTUD4	22.7229	-0.267749	0.12466	0.0100799	0.0426287
RAB28	26.4778	-0.235896	0.105506	0.0101877	0.0430482
VPS28	22.8428	-0.247231	0.112299	0.0102442	0.0432506
SCG2	13.8002	-0.323117	0.162983	0.01029	0.0433629
CCT5	28.5547	-0.251692	0.114791	0.0102962	0.0433629
HEY1	13.16	0.282849	0.13772	0.0102969	0.0433629
TRIP12	35.2243	-0.206717	0.0896027	0.010342	0.0435163
ARHGEF1	13.5678	0.282149	0.137519	0.0103887	0.0436763
RGR	13.8452	-0.296442	0.143509	0.0104355	0.0438342
EPN2	23.7251	0.238454	0.109057	0.0104438	0.0438342
PHF1	13.9667	0.281716	0.137969	0.010477	0.0439366
ZNF800	15.955	-0.300122	0.147506	0.0104924	0.0439645
P4HA2	17.8963	-0.302481	0.15015	0.01054	0.044127
TOR1AIP2	22.0325	-0.254683	0.117495	0.0105536	0.0441471
SERPINE1	11.4673	0.322855	0.169854	0.0105764	0.0442051
IER5	12.8848	0.290521	0.144024	0.0105909	0.0442289
RASSF10	18.3748	-0.306503	0.151719	0.0106254	0.0443319
RTRAF	22.5555	0.238288	0.108986	0.0106333	0.0443319
PGRMC2	33.0061	0.213899	0.0952195	0.0107625	0.0448334
CHMP1B	20.3901	0.246086	0.114008	0.0108356	0.0451003
SURF4	14.0988	0.304724	0.157162	0.0108452	0.0451026
SDHA	27.808	0.297843	0.150664	0.0108945	0.04527
UPK3BL2	27.4992	0.254222	0.119339	0.0109061	0.0452806
CYBRD1	18.5354	0.250129	0.117305	0.0109288	0.0453371
PTK2	18.3796	0.264308	0.126813	0.0109768	0.0454985
NRG1	17.899	-0.278275	0.133981	0.01103	0.0456813
TRIO	29.5574	-0.220445	0.0983883	0.0110471	0.0457143
STAT3	27.3897	-0.240388	0.110321	0.0111456	0.0460839
PSMD8	26.3591	0.218117	0.0983168	0.0111728	0.0461531
ZFR	13.1017	-0.320941	0.164862	0.0111912	0.0461531
PDK4	21.1871	0.247351	0.116049	0.0111944	0.0461531
RBM38	19.3859	0.24959	0.11757	0.0111992	0.0461531
MAMDC2	18.4134	-0.308221	0.157383	0.0112167	0.0461868
VWA5A	19.4508	0.276095	0.1361	0.01123	0.0462038
ADI1	28.0966	0.220696	0.0997863	0.0112448	0.0462266
CR2	23.3407	-0.302541	0.151779	0.0112646	0.0462698
COL11A1	15.7551	-0.33955	0.182091	0.0112825	0.0463055
MAP1A	31.3562	-0.24399	0.113589	0.0113086	0.0463745
SLC40A1	16.0688	0.264476	0.128029	0.0114407	0.0468539
POU5F1	28.0574	-0.254165	0.119584	0.0114442	0.0468539
MXRA7	27.0729	0.27749	0.137747	0.01151	0.0470845
RUFY1	18.4501	-0.300036	0.149727	0.0116036	0.0473803
GNAS	115.852	0.287308	0.143252	0.0116099	0.0473803
SMPX	47.0668	0.238366	0.111007	0.0116107	0.0473803
MACO1	27.2705	-0.270498	0.130197	0.011624	0.047396
MACF1	57.7765	-0.286674	0.145429	0.0116778	0.0475768
MARK3	22.8898	-0.247783	0.115273	0.0116904	0.0475892
C1orf105	26.2084	-0.231156	0.105668	0.011704	0.047606
SLC35E2B	18.1911	0.259469	0.126164	0.011738	0.0477052
FUBP1	33.0831	-0.223021	0.101064	0.0117729	0.0478083
RPL36A	50.5521	0.264416	0.126457	0.0117838	0.0478137
ZNF787	19.4484	0.245378	0.11639	0.0118297	0.0479609
GSTT2	22.9844	-0.273995	0.132926	0.0119498	0.0484087
CRYBB3	11.579	0.302936	0.15859	0.0119942	0.0485495
KHDC4	22.3096	-0.249121	0.11738	0.0120449	0.048715
DAZAP1	14.7906	0.268955	0.132822	0.0120778	0.0487728
TOMM20	24.0998	-0.240034	0.111091	0.0120793	0.0487728
TUBA1C	168.312	0.245826	0.115799	0.0120884	0.0487728
TBK1	20.03	-0.301924	0.154801	0.0121051	0.0488009
BET1L	19.1087	0.252618	0.121128	0.0121568	0.0489402
TMED4	18.11	0.271058	0.13534	0.0121667	0.0489402
NONO	28.2931	-0.236951	0.109963	0.012169	0.0489402
PTP4A3	48.9794	-0.204851	0.0918823	0.0122149	0.0490851
SPPL2A	14.6951	0.275078	0.138519	0.0123253	0.0494724
RPL35A	32.7123	0.269292	0.13194	0.012331	0.0494724
PLPP7	23.0107	0.231055	0.108179	0.0124334	0.0498431
TCEAL7	60.3851	0.232153	0.10764	0.0124827	0.0500007
NFKB2	47.9555	-0.4183	0.285201	0.0125752	0.050331
NRBP2	15.8683	0.266323	0.132642	0.0126043	0.0504073
TP53INP2	23.2307	0.261789	0.127931	0.0126433	0.0505091
H2AC6	16.1867	0.2626	0.129206	0.01265	0.0505091
CT47A10	25.0752	-0.305844	0.158708	0.0127903	0.0509979
MDH2	27.0562	0.233527	0.109691	0.0127928	0.0509979
NUP160	10.9326	-0.315748	0.165276	0.0128085	0.0510028
GOSR1	16.8276	0.269017	0.134943	0.0128144	0.0510028
PALLD	42.8149	0.264277	0.131227	0.0128283	0.0510176
LRPAP1	19.7893	0.235195	0.111564	0.0128388	0.0510187
MEX3C	17.887	-0.26084	0.126289	0.0129079	0.0512526
ZNF684	42.3041	0.237161	0.113994	0.0131863	0.0523166
GABARAPL2	25.6957	0.216993	0.101271	0.0134426	0.0532911
CLIP3	23.6085	-0.333072	0.184604	0.0134953	0.0534577
ZNF385D	10.7832	0.299575	0.162924	0.0135813	0.0537559
PPP4R1	15.1564	-0.280883	0.141476	0.0136208	0.0538696
TLK2	39.7852	-0.223252	0.104343	0.0137716	0.0544228
CHD3	16.5619	-0.277577	0.140384	0.0138621	0.0547374
CYS1	19.3673	-0.265124	0.132131	0.0138842	0.0547591
PLXNA2	10.5182	0.307351	0.169359	0.0138895	0.0547591
TAP2	12.7442	0.287718	0.15321	0.0139163	0.0548213
RGS9	21.5058	-0.304678	0.163216	0.013983	0.0550408
CAT	14.7569	-0.275983	0.139085	0.0140672	0.0553286
PRDX5	23.2109	0.234813	0.113706	0.0141293	0.0555292
SYNRG	18.9014	-0.249154	0.121213	0.0142265	0.0558674
LIMA1	19.3885	-0.240611	0.115151	0.0142613	0.0559603
BAIAP2L2	14.4624	0.2804	0.147638	0.0143567	0.0562902
GIPR	18.1927	-0.300719	0.160403	0.0144304	0.0565352
GIGYF1	12.4361	0.271996	0.141618	0.0144827	0.0566544
SIPA1L3	16.8574	0.25399	0.127472	0.0144835	0.0566544
RTN4	76.8696	-0.231111	0.110946	0.0144964	0.0566606
FOXO6	15.1357	0.271873	0.142184	0.0145577	0.0568558
TAS2R43	15.9991	-0.291826	0.153917	0.0146351	0.0571135
COP1	11.5976	-0.312986	0.171128	0.0147076	0.0573518
COL25A1	22.9455	-0.30658	0.167638	0.0147685	0.0575443
LAMB2	40.5876	-0.206457	0.0958422	0.0148035	0.0576357
ZNF638	22.6653	-0.231459	0.110165	0.0148301	0.0576944
NR4A1	21.873	0.283773	0.151613	0.0148428	0.0576988
ZNF841	20.0511	-0.266194	0.134215	0.0148741	0.0577757
TIAL1	26.6277	-0.234085	0.113128	0.0150525	0.0584232
CHRDL2	17.4429	-0.291977	0.155119	0.0151207	0.0586427
PCSK6	36.575	-0.270281	0.139954	0.0151572	0.0587384
FADS1	23.3346	-0.236684	0.114807	0.0151817	0.0587881
SLC39A7	25.4394	0.223725	0.108	0.0152107	0.0588546
RPS13	46.637	0.247023	0.123298	0.0152433	0.0589149
GGTLC1	117.344	-0.239709	0.118792	0.0152498	0.0589149
AARSD1	15.3648	-0.273887	0.140405	0.0154169	0.0595146
ZBTB8OS	13.9503	-0.312714	0.172966	0.0155351	0.0599247
CYTH2	12.792	0.274122	0.146281	0.0155582	0.0599614
FYB1	17.8169	-0.290398	0.155439	0.0155686	0.0599614
SRGAP3	22.9073	-0.241975	0.118972	0.0156025	0.0600359
EIF4G3	22.2804	-0.247528	0.12241	0.015612	0.0600359
PSMD2	31.2316	0.217347	0.104236	0.0157955	0.0606949
PSKH2	26.2904	-0.261123	0.132955	0.0158094	0.0607017
CDK4	17.7726	0.234161	0.11567	0.0158272	0.0607236
CGB2	7.92122	0.323305	0.194392	0.015863	0.0608144
SMARCA2	21.6176	-0.241437	0.118509	0.0158918	0.0608779
TCAF1	26.3114	-0.268868	0.140951	0.0159229	0.0609506
H3C15	10.9207	0.293426	0.163611	0.0159586	0.0610403
TCF4	29.0239	-0.220343	0.10541	0.0160752	0.0614354
ZC2HC1C	25.8502	0.28749	0.157514	0.0160938	0.0614354
PCYOX1	14.635	-0.276395	0.144457	0.0160987	0.0614354
CCDC110	25.3801	-0.224186	0.10828	0.0162119	0.0618202
THAP10	5.37674	0.358106	0.235929	0.0162718	0.0619719
FNBP4	17.111	-0.256056	0.129724	0.0162883	0.0619719
CMBL	8.68315	0.298787	0.171213	0.0162888	0.0619719
WLS	19.0156	-0.243878	0.121194	0.0163024	0.0619763
KLHL8	12.2115	-0.308636	0.170101	0.0163232	0.0620083
MATR3	21.5906	-0.242811	0.121208	0.0163638	0.0621154
ADAR	16.7741	0.252012	0.131015	0.0164732	0.0624831
RPL26L1	74.7413	-0.269933	0.14433	0.0165686	0.0627974
LGALS7B	15.2184	-0.294601	0.162381	0.0165977	0.0628602
MPZ	18.9536	0.261417	0.137202	0.0167363	0.063297
VDAC3	27.9645	0.202841	0.0967801	0.0167383	0.063297
HEATR5A	28.6145	0.220682	0.108749	0.0167989	0.063478
TMEM37	12.2768	0.268248	0.144244	0.0168833	0.0637486
COPS2	18.2704	0.243761	0.124433	0.0169623	0.0639553
ARFGAP1	18.5462	0.260557	0.138856	0.0169636	0.0639553
GNG2	16.4685	0.266822	0.14129	0.0170683	0.0643017
SOX4	29.5762	0.213834	0.104776	0.0171131	0.0644221
LMAN1	27.6925	-0.263884	0.137508	0.0171406	0.064477
H2AX	14.329	0.262638	0.139604	0.0171548	0.0644821
MAP9	16.4876	-0.297566	0.164336	0.0171736	0.0645043
CAND2	15.9455	0.286637	0.160457	0.0172164	0.0646143
DRG2	12.9442	0.270679	0.147558	0.0172288	0.0646143
ZNF723	69.2518	-0.240626	0.12327	0.017325	0.0649267
PAX4	15.2467	-0.302459	0.171666	0.0173395	0.0649323
DHX9	19.7113	-0.253639	0.13002	0.0173781	0.0650283
TMOD3	9.27762	0.311909	0.184088	0.017461	0.0652895
UBE2E3	19.4788	-0.248674	0.127113	0.0176762	0.0660447
FOCAD	9.29996	-0.149553	0.140648	0.0177795	0.0663712
ADAM33	17.7341	0.23431	0.119495	0.0177901	0.0663712
TSGA10	16.812	-0.306765	0.181118	0.0178058	0.0663802
ZFYVE19	11.976	0.277662	0.15541	0.017854	0.066506
PPIA	55.9906	0.211993	0.103183	0.0178661	0.066506
PPP6R2	13.4178	0.290028	0.166801	0.017936	0.0667165
KDM4D	11.2252	-0.312583	0.179899	0.0180488	0.0670864
KLF12	18.1601	-0.256796	0.134311	0.01814	0.0673751
AIF1	17.4081	0.330412	0.209242	0.0181818	0.0674804
IREB2	22.7658	-0.224531	0.110903	0.0182016	0.0675039
RHPN2	13.1129	0.272013	0.150917	0.0182305	0.067561
NSUN5	12.5755	0.286955	0.165116	0.0182701	0.0676574
BMF	16.2469	-0.29396	0.16658	0.0183136	0.0677453
EIF5A	38.4198	0.222767	0.111641	0.0183209	0.0677453
NPLOC4	29.9363	0.228682	0.116691	0.0185096	0.0683926
CDPF1	17.0377	0.237039	0.122447	0.0185344	0.0684338
RPL27	50.65	0.229442	0.117133	0.0186329	0.0687467
PLXDC2	16.9189	0.256524	0.138038	0.018726	0.0690394
ADSL	24.9038	-0.223318	0.111362	0.0187702	0.0691513
GRAP2	15.5691	-0.25969	0.137316	0.0187961	0.0691958
SLC34A2	13.7527	-0.291719	0.165104	0.0188359	0.0692488
PCGF2	12.3596	0.257346	0.139105	0.0188446	0.0692488
ZDBF2	13.8459	-0.285571	0.159713	0.0188521	0.0692488
MLLT6	27.9743	0.211933	0.105442	0.0189784	0.0696618
P2RY6	10.5183	-0.299772	0.171586	0.0190744	0.0699627
XBP1	18.7422	0.23028	0.118092	0.0191089	0.0700378
DNAJA4	49.4529	0.244041	0.128111	0.0191835	0.0702527
PHGDH	17.0391	-0.281666	0.156715	0.0191966	0.0702527
BACE2	12.6065	-0.28222	0.156407	0.0192096	0.0702527
EWSR1	37.2023	-0.186192	0.088526	0.0192977	0.0705233
ATP5MG	29.2564	0.20447	0.100526	0.0193141	0.0705315
CYBA	19.3905	0.225877	0.115923	0.0193777	0.0706626
COX5B	26.264	0.247295	0.130391	0.0193782	0.0706626
NPEPPS	27.4894	-0.20569	0.100265	0.0194303	0.0708011
BAHD1	19.0399	-0.247665	0.128832	0.0194623	0.070829
PAGE5	260.354	-0.323238	0.208434	0.0194663	0.070829
[truncated: 3,628 more rows]

## Sheet: PAX7MDX_Post_vs_Pre
Gene	baseMean	log2FoldChange	lfcSE	pvalue	padj
[truncated: 4,782 more rows]

[truncated: 1 more sheets: FIBERMDX_Post_vs_Pre]
