# Supplementary material
Source: Research Square preprint supplement (doi:10.21203/rs.3.rs-9408825/v1)
Supplement: Supplementary file 3 [file 8c5563b82958ebde41bd7fd4.xlsx]

## Sheet: CONTvsDOX
	baseMean	log2FoldChange	lfcSE	pvalue	padj
MSLN	1748.25	3.80506	0.279627	1.28276e-43	3.10262e-39
PCOLCE2	1497.26	2.09333	0.164586	2.17673e-38	2.63243e-34
LRP2	4921.94	3.83429	0.313122	6.33118e-36	5.10441e-32
LGALS2	1955.89	3.4098	0.280319	1.92316e-35	1.16289e-31
CDH18	5751.23	3.75	0.313639	2.29077e-34	1.10814e-30
SILC1	2762.87	4.29608	0.392092	2.31393e-29	9.32785e-26
FRAS1	5519.11	2.50051	0.232397	2.38832e-28	8.25232e-25
MSANTD1	213.392	3.81244	0.366884	1.15727e-26	3.49886e-23
TNFSF8	109.643	5.68287	0.540178	3.55013e-26	9.54076e-23
IPO5P1	3967.88	2.6947	0.26369	9.12738e-26	2.20764e-22
KCNN2	1527.92	2.23394	0.219722	1.32909e-25	2.92243e-22
NELL2	8282.85	2.2141	0.218298	1.57916e-25	3.18292e-22
SLC30A10	209.01	4.04857	0.401585	3.8583e-25	7.17851e-22
ALDH1A2	8355.81	2.47322	0.249726	8.28906e-25	1.43205e-21
SFRP2	88137.7	3.9567	0.396614	1.25608e-24	2.02539e-21
LCP1	6524.45	3.8501	0.394425	6.49293e-24	9.81527e-21
RORB	822.804	3.37422	0.346622	8.74154e-24	1.24372e-20
P2RY1	3902.2	3.19971	0.328784	1.05483e-23	1.4174e-20
KDR	2398.95	3.41534	0.356258	3.47757e-23	4.42695e-20
BDKRB1	916.35	3.41781	0.367754	5.81609e-22	7.03369e-19
WT1-AS	387.165	2.47411	0.271875	4.17138e-21	4.80443e-18
SYT1	4603.64	1.86329	0.206677	1.21068e-20	1.33104e-17
SELENOP	6268.34	2.52743	0.287329	7.78812e-20	8.19005e-17
LOC284865	97.3218	4.69696	0.538237	1.70691e-19	1.72021e-16
CYP2W1	944.481	2.51863	0.292103	2.8371e-19	2.74484e-16
PDE8B	1395.35	2.27162	0.264833	4.36147e-19	4.05734e-16
LOC646762	5324.42	2.19782	0.258813	9.17962e-19	8.22324e-16
SMPD3	1771.55	4.01041	0.477057	1.48779e-18	1.28519e-15
WT1	1292.83	1.92706	0.229101	1.93164e-18	1.61105e-15
NEBL	2934.15	2.49403	0.29735	2.16702e-18	1.74712e-15
MFSD4A	978.412	2.03367	0.24287	2.53659e-18	1.91927e-15
LOC105375213	1970.59	3.82284	0.457427	2.53924e-18	1.91927e-15
PKHD1L1	1286.66	3.95498	0.475884	3.48745e-18	2.55609e-15
CARNS1	2014.02	2.74472	0.334634	9.86809e-18	7.01998e-15
GATA5	337.626	3.11989	0.382101	1.13072e-17	7.81394e-15
SLC6A2	91.2233	7.02547	0.846834	2.84674e-17	1.9082e-14
NRXN1	888.991	2.19178	0.271213	2.91906e-17	1.9082e-14
HAND1	961.677	4.01064	0.501221	4.31907e-17	2.74909e-14
RIMS2	603.36	3.06715	0.383389	5.31412e-17	3.29571e-14
ARHGDIG	242.506	2.94122	0.372456	1.07925e-16	6.52595e-14
C1QL1	1247.95	2.18917	0.277069	1.18003e-16	6.91278e-14
METTL24	1567.29	2.24049	0.284211	1.20038e-16	6.91278e-14
PRPH	599.345	3.14771	0.401477	1.60474e-16	9.02647e-14
KLHL32	391.509	2.17557	0.281102	4.78662e-16	2.63123e-13
EPB42	259.599	4.31921	0.564236	7.56085e-16	4.06387e-13
LOC107984900	349.499	3.79921	0.498552	8.65935e-16	4.55312e-13
ADRB3	209.32	2.48993	0.332155	2.98788e-15	1.53761e-12
LOC101928409	257.859	2.57906	0.350925	8.37716e-15	4.22122e-12
HGF	5695.49	2.60536	0.353707	8.89257e-15	4.38948e-12
BNC1	3048.31	3.19842	0.436872	1.00571e-14	4.86502e-12
CPNE5	1275.53	1.57103	0.214842	1.38721e-14	6.57892e-12
SSC4D	527.709	2.00602	0.275565	1.551e-14	7.21426e-12
MS4A7	70.6217	10.6476	2.98439	1.63133e-14	7.44474e-12
CA11	1275.39	2.19475	0.30714	4.07147e-14	1.81615e-11
FBXO32	1673.59	1.46523	0.204433	4.12984e-14	1.81615e-11
SLC13A3	701.083	1.67072	0.233845	4.41489e-14	1.90684e-11
ATP7B	3564.57	2.25434	0.31919	8.18906e-14	3.47489e-11
LRRC2	439.38	1.81569	0.257824	8.8269e-14	3.68097e-11
SLC22A3	2566.66	2.31787	0.33323	1.58309e-13	6.48986e-11
SEZ6L2	1966.72	2.77108	0.399573	1.69146e-13	6.79693e-11
GPR146	367.025	1.77025	0.254428	1.7142e-13	6.79693e-11
KLK11	330.616	4.14878	0.602219	1.98558e-13	7.74602e-11
CAMK4	413.804	1.87854	0.272438	2.55139e-13	9.7953e-11
TMEM151A	1027.18	3.73392	0.545139	2.69046e-13	1.01678e-10
LOC101928343	49.0345	6.54865	0.902661	4.27992e-13	1.58197e-10
HAND2-AS1	1147.48	3.27279	0.482602	4.31677e-13	1.58197e-10
UPK3B	1229.63	3.20098	0.47245	4.59691e-13	1.65948e-10
ADAMTSL3	1203.48	2.78264	0.411528	5.45998e-13	1.94207e-10
PTGS1	2424.68	1.89046	0.278753	6.52073e-13	2.28575e-10
ABO	117.273	2.74628	0.409541	7.98258e-13	2.75821e-10
PPP2R2C	821.656	3.23563	0.483706	8.26799e-13	2.81659e-10
OGFRL1	9689.57	2.18704	0.323089	1.01357e-12	3.40489e-10
CLDN15	526.78	2.49939	0.376498	1.29747e-12	4.2989e-10
PPP2R2B	875.291	2.88488	0.43574	1.37449e-12	4.45521e-10
UNC13D	389.101	1.94223	0.292411	1.38149e-12	4.45521e-10
LOC643201	93.5015	2.58816	0.392331	2.17988e-12	6.93748e-10
SLC5A9	187.242	3.91057	0.599702	2.34757e-12	7.37412e-10
CCDC73	260.162	2.97194	0.456331	2.551e-12	7.9104e-10
LOC105374559	456.634	2.42454	0.371541	2.89512e-12	8.86384e-10
SGCZ	227.605	2.4114	0.371638	3.89432e-12	1.1774e-09
DSC1	111.602	2.42518	0.375058	4.29039e-12	1.28113e-09
RAMP2	1230.92	1.29073	0.199148	5.50589e-12	1.62404e-09
GRIN3A	396.825	2.32547	0.364821	8.30457e-12	2.42003e-09
CA3	821.371	1.47037	0.231397	1.08068e-11	3.11172e-09
BCHE	15832.7	1.1416	0.17867	1.11915e-11	3.18459e-09
PCDH7	12384.3	1.52267	0.240222	1.16676e-11	3.28145e-09
LRRC63	217.456	3.60411	0.573145	1.26746e-11	3.52368e-09
SCUBE1	1283.32	-1.16588	0.183092	1.32446e-11	3.64031e-09
FOLR2	63.261	6.82856	1.04405	1.43531e-11	3.90067e-09
IGSF9	669.637	2.22807	0.354583	1.5407e-11	4.14055e-09
LRRN4	3051.4	2.98375	0.478308	1.68846e-11	4.48779e-09
PDIA2	361.253	3.20812	0.517676	1.93105e-11	5.03746e-09
TMEM235	327.652	3.76143	0.607248	1.95664e-11	5.03746e-09
GASK1B	6784.03	1.896	0.303521	1.95775e-11	5.03746e-09
SLC22A16	75.9563	5.13855	0.820546	2.48227e-11	6.2774e-09
TMEM98	14335.4	1.61132	0.258824	2.49155e-11	6.2774e-09
SLC39A4	353.908	2.36933	0.382554	2.60753e-11	6.50189e-09
REEP1	4022.07	1.35787	0.218271	2.64559e-11	6.52947e-09
MS4A6A	38.0113	9.57067	2.91069	2.98498e-11	7.29269e-09
COL9A3	4962.33	1.61342	0.260893	3.04315e-11	7.36046e-09
COX6B2	522.548	2.36378	0.385599	3.66334e-11	8.77279e-09
CNTNAP4	1490.37	1.88298	0.306118	3.72545e-11	8.83407e-09
FCHO1	382.777	1.57219	0.256835	4.64258e-11	1.0902e-08
PRCD	683.437	2.39488	0.394417	5.43869e-11	1.26486e-08
FAM71E2	48.5512	3.61349	0.592717	5.93479e-11	1.36709e-08
C1QB	49.8051	6.17606	0.975032	7.04535e-11	1.6076e-08
ALOX15	181.593	3.45535	0.574775	7.21724e-11	1.63143e-08
DPYD	1625.07	1.9553	0.325566	9.47158e-11	2.12119e-08
GATA6-AS1	297.596	2.64781	0.443987	1.00624e-10	2.23284e-08
SEMA4A	370.104	1.3159	0.218984	1.04992e-10	2.30858e-08
OSR1	4519.44	1.29629	0.216003	1.11431e-10	2.42809e-08
SLC9A3R1	3512.94	1.54783	0.260675	1.2611e-10	2.7234e-08
CCDC85A	1614.94	1.67948	0.282671	1.33609e-10	2.85983e-08
CPNE2	2321.18	0.988751	0.164987	1.37861e-10	2.92495e-08
TNFSF13B	2371.63	1.75442	0.296379	1.70291e-10	3.58158e-08
LOC101927760	208.789	3.99246	0.683448	1.87683e-10	3.91336e-08
GJA3	623.61	2.53428	0.433061	1.91329e-10	3.95528e-08
LOC200772	39.2693	5.18591	0.864474	1.95892e-10	4.0153e-08
QRFPR	275.417	2.59343	0.444333	2.15353e-10	4.37709e-08
LOC107985216	149.152	1.98467	0.339295	2.20725e-10	4.41684e-08
CAMK2B	303.412	1.59633	0.272046	2.20961e-10	4.41684e-08
UBXN10	314.417	2.5829	0.444138	2.34237e-10	4.64385e-08
TSPAN2	2561.24	2.26168	0.387964	2.3907e-10	4.70114e-08
CBLN2	1594	2.10835	0.362799	2.7397e-10	5.34397e-08
UBXN10-AS1	39.23	4.2169	0.719317	2.89476e-10	5.60125e-08
TYRO3	3199.39	1.37747	0.236685	2.98231e-10	5.72484e-08
GRIA4	774.107	1.77734	0.306491	3.08976e-10	5.88441e-08
CCDC178	260.172	1.535	0.264576	3.23988e-10	6.1221e-08
FXYD5	983.683	2.22564	0.386075	3.43438e-10	6.43934e-08
PHACTR1	4757.64	2.04653	0.352952	3.49487e-10	6.50233e-08
PER3	1252.36	1.28058	0.221038	3.56581e-10	6.57931e-08
C16orf74	192.78	2.3798	0.412886	3.59065e-10	6.57931e-08
LOC105374557	1261.77	2.13069	0.371695	4.19831e-10	7.63493e-08
CNTN5	869.305	1.18315	0.205399	4.80456e-10	8.67224e-08
MST1	701.039	1.48836	0.25958	4.84226e-10	8.67553e-08
HAND2	807.611	3.03378	0.535273	5.26292e-10	9.35986e-08
NPHS1	527.656	2.1256	0.373764	5.38946e-10	9.51495e-08
OLFM3	3450.48	2.30451	0.403162	5.45236e-10	9.55624e-08
FLT3	179.502	3.76309	0.666203	5.70984e-10	9.93553e-08
RAB38	1211.35	1.7857	0.313521	5.84485e-10	1.00978e-07
ATF7IP2	1337.24	1.30027	0.227583	5.96025e-10	1.02242e-07
FCGR2A	200.017	3.60192	0.640462	6.13452e-10	1.0449e-07
PLA2G4D	167.359	3.74285	0.664751	6.49466e-10	1.09851e-07
KLF14	77.3449	2.37873	0.421034	7.36378e-10	1.23686e-07
TNFSF15	362.91	2.25595	0.400884	7.49726e-10	1.2506e-07
RYR2	2494.71	1.19354	0.210283	7.8708e-10	1.30391e-07
BIRC3	1377.99	3.15879	0.565265	8.63562e-10	1.42088e-07
TNFAIP8	2436.52	1.49985	0.266257	8.71626e-10	1.42446e-07
PLLP	483.881	2.05558	0.366654	8.78908e-10	1.42672e-07
PLPP4	1062.04	2.7845	0.498715	9.01837e-10	1.45418e-07
LOC107984007	21.8883	8.63245	2.80243	9.14881e-10	1.46545e-07
MAPK10	1003.08	1.21547	0.215628	9.60011e-10	1.52762e-07
SMIM5	282.647	2.06202	0.370209	1.04692e-09	1.65503e-07
ECRG4	887.619	1.52267	0.272511	1.12211e-09	1.76237e-07
SLC16A5	1553.89	1.28389	0.231209	1.57069e-09	2.45098e-07
RASD2	842.049	3.29148	0.6032	1.67779e-09	2.60133e-07
AKR1B15	254.178	3.73625	0.687002	1.76349e-09	2.71678e-07
KCNV1	140.341	4.12212	0.756038	1.79269e-09	2.74429e-07
ANKRD63	68.7397	2.79677	0.512395	1.86837e-09	2.84216e-07
TMEM191A	144.522	2.86099	0.52524	1.91225e-09	2.89073e-07
RAC2	467.132	2.15468	0.396613	2.2077e-09	3.31662e-07
STAB1	73.7582	4.51401	0.829411	2.42631e-09	3.62254e-07
ADAMTS6	461.863	2.0817	0.385683	2.82773e-09	4.19596e-07
SERPINE3	4589.79	4.28388	0.802531	2.86869e-09	4.2308e-07
DSG2	10840	2.14387	0.395665	2.95193e-09	4.32718e-07
CD83	1358.1	1.36869	0.25285	3.22343e-09	4.69669e-07
NOVA1	919.722	1.03859	0.190865	3.33158e-09	4.81494e-07
MYRF	5622.02	2.65625	0.495579	3.3444e-09	4.81494e-07
ISOC1	4854.99	1.08389	0.199509	3.39972e-09	4.86562e-07
FOXF1	131.765	3.14417	0.588106	3.46032e-09	4.92322e-07
LOC105372019	158.273	2.94879	0.556161	3.84944e-09	5.44482e-07
CDH8	1474.47	2.20467	0.414165	4.05773e-09	5.70607e-07
KCNK3	320.214	1.57097	0.293979	4.42243e-09	6.18297e-07
LOC101927267	136.78	2.18763	0.412612	4.71392e-09	6.55262e-07
LOC105376571	102.228	3.0372	0.579422	6.31002e-09	8.72117e-07
AQP7	147.963	1.95013	0.371893	6.52408e-09	8.9658e-07
BMP3	593.147	1.94161	0.371663	7.54665e-09	1.03125e-06
CLIC3	118.126	2.64877	0.511878	8.40075e-09	1.14151e-06
MS4A4A	20.2329	8.4488	2.82529	8.68063e-09	1.17259e-06
EMX2OS	1123.58	1.98504	0.382176	8.72643e-09	1.17259e-06
SH3TC1	621.919	2.89709	0.561496	8.89359e-09	1.18845e-06
HSPA12B	1132.26	0.794367	0.14966	9.23804e-09	1.22769e-06
CDH3	2088.24	1.44182	0.276826	9.36356e-09	1.23758e-06
CFC1	33.9384	3.44944	0.669817	9.85186e-09	1.29504e-06
TRANK1	1618.02	1.87971	0.364139	1.10666e-08	1.44685e-06
PPL	1011.28	2.16762	0.42135	1.19483e-08	1.55373e-06
CTTNBP2	1257.7	1.86798	0.364482	1.26412e-08	1.62907e-06
ATP8B4	693.813	-0.819398	0.155807	1.26624e-08	1.62907e-06
LINC00899	271.21	1.04301	0.201995	1.51373e-08	1.93718e-06
GREM2	1088.33	-1.19888	0.232169	1.54005e-08	1.96048e-06
LOC107984413	16.3934	-6.13927	1.21104	1.56152e-08	1.97741e-06
MCUB	1149.72	1.09583	0.213592	1.74113e-08	2.19337e-06
LOC400940	87.4615	3.60529	0.722532	2.01887e-08	2.53008e-06
KIF21A	796.786	1.99291	0.395156	2.10645e-08	2.62623e-06
LOC107984506	52.0309	3.60268	0.714183	2.19931e-08	2.72793e-06
NAP1L3	2488.62	1.4857	0.294417	2.33685e-08	2.88375e-06
RBFOX3	131.378	2.2751	0.455671	2.47047e-08	3.03316e-06
TCF21	331.925	2.00274	0.400411	2.48674e-08	3.03772e-06
PCLO	457.667	1.58115	0.315811	2.52015e-08	3.05535e-06
TMEM190	69.1303	2.64884	0.532805	2.52644e-08	3.05535e-06
RBPMS	1757.05	1.22418	0.243359	2.64755e-08	3.18589e-06
AARD	151.38	1.99375	0.400345	2.72766e-08	3.26604e-06
RNF150	7822.67	1.11032	0.2205	2.82867e-08	3.3703e-06
PLEKHA6	1582.17	0.970147	0.192271	2.90311e-08	3.44204e-06
FENDRR	13.0104	7.71653	2.70535	2.98189e-08	3.5182e-06
LLGL2	641.025	1.96626	0.397486	3.1155e-08	3.65799e-06
DST	21958.3	0.732771	0.14497	3.1323e-08	3.65995e-06
RELN	1191.42	1.95393	0.395034	3.19394e-08	3.70472e-06
PDE1A	1271.92	1.71615	0.344612	3.20125e-08	3.70472e-06
SH3GL2	414.903	1.88616	0.381713	3.32023e-08	3.82412e-06
GIPR	338.502	2.70755	0.556195	3.98604e-08	4.55364e-06
FAM133A	286.303	2.27603	0.466029	3.99128e-08	4.55364e-06
ISL1	875.245	2.46903	0.50608	4.01036e-08	4.55392e-06
C1QL4	364.677	2.74487	0.564863	4.03854e-08	4.5645e-06
VTN	190.43	1.95007	0.398647	4.12283e-08	4.63809e-06
TMIGD3	17.614	8.18037	2.82147	4.22812e-08	4.73451e-06
CD300A	179.259	2.56746	0.528215	4.26657e-08	4.74298e-06
C1QA	52.8976	4.82156	0.974053	4.27489e-08	4.74298e-06
RAB33A	523.571	1.88112	0.386058	4.58455e-08	5.06331e-06
CDH1	5072.19	2.44421	0.502463	4.64329e-08	5.10488e-06
RAMP2-AS1	1062.09	1.07014	0.217265	4.99569e-08	5.46746e-06
TMEM255A	848.039	1.16698	0.238374	5.45513e-08	5.94339e-06
LOC105374672	14.7163	7.88932	2.76596	5.57005e-08	6.04138e-06
KCNN1	170.055	1.50508	0.310002	5.86248e-08	6.33017e-06
LOC105373945	26.3462	3.35947	0.68813	5.90379e-08	6.34644e-06
LINC02232	172.576	3.4669	0.724609	5.97637e-08	6.39603e-06
PSAPL1	170.871	3.5565	0.751198	6.72404e-08	7.16451e-06
NR2F1	3694.57	1.35371	0.280669	6.81428e-08	7.22882e-06
LOC101927947	92.4154	2.15628	0.451578	7.16615e-08	7.56889e-06
MCTP2	914.939	1.88076	0.393035	7.65699e-08	8.05216e-06
ARFGEF3	1479.51	1.8954	0.39796	7.81504e-08	8.18278e-06
NTF4	182.261	1.54381	0.323058	8.24923e-08	8.60018e-06
LACC1	810.732	2.0256	0.427482	8.74425e-08	9.01122e-06
ANXA8L1	440.361	4.34183	0.932673	8.75226e-08	9.01122e-06
SLC27A6	374.572	3.03544	0.645186	8.75527e-08	9.01122e-06
TENM2	1994.43	1.71072	0.359954	9.21001e-08	9.43909e-06
PCDH20	1990.72	1.91436	0.406575	1.05653e-07	1.07824e-05
C17orf107	125.878	1.7705	0.375483	1.06732e-07	1.08468e-05
MARCHF1	988.499	1.58994	0.336942	1.08669e-07	1.09974e-05
FAM20A	1740	2.29675	0.491462	1.11922e-07	1.12794e-05
LAPTM5	94.0289	3.36927	0.724636	1.13855e-07	1.14266e-05
GATA6	2922.08	1.92494	0.409603	1.29438e-07	1.29369e-05
PAPLN	1369.01	1.61159	0.342966	1.34784e-07	1.34157e-05
GCA	3106.23	1.18975	0.252855	1.38672e-07	1.37461e-05
LINC01798	51.8663	1.67796	0.357788	1.41997e-07	1.39917e-05
LOC105378030	226.77	2.70886	0.589094	1.42306e-07	1.39917e-05
RIPOR3	943.29	1.90363	0.411073	1.48004e-07	1.4493e-05
KCNC4	428.091	1.31589	0.281738	1.51026e-07	1.47293e-05
CNTNAP2	1495.51	2.05447	0.44566	1.60737e-07	1.56134e-05
ACKR1	22.4558	5.25498	1.07095	1.63746e-07	1.58421e-05
NCCRP1	242.245	1.68552	0.365186	1.73262e-07	1.6696e-05
NKX3-1	37.614	1.9133	0.413686	1.7876e-07	1.71575e-05
VWA5B1	177.952	1.85779	0.405386	1.8118e-07	1.7321e-05
CACNB3	2548.15	1.05892	0.226884	1.84163e-07	1.75369e-05
NRP2	9439.13	1.81157	0.394981	1.97979e-07	1.87785e-05
MYOCD	207.612	3.31869	0.73986	2.25497e-07	2.1305e-05
IER5	988.073	-0.993342	0.215204	2.76551e-07	2.6027e-05
TNFAIP8L3	322.196	2.09637	0.466244	2.77845e-07	2.60474e-05
KCNA5	591.295	2.06327	0.460027	2.82296e-07	2.63625e-05
LOC105371910	38.5835	3.05537	0.675703	2.83791e-07	2.64002e-05
PYGM	2099.48	1.05796	0.231384	2.89766e-07	2.68528e-05
CAMK2N1	1581.93	1.5722	0.348871	2.94983e-07	2.72212e-05
ARL6IP1	56298.3	-0.733858	0.157328	2.95993e-07	2.72212e-05
ARHGAP44	300.678	1.21556	0.267697	3.00229e-07	2.75062e-05
CHAT	27.211	4.30963	0.950597	3.11302e-07	2.84131e-05
ZNF528	231.014	1.75295	0.391807	3.28521e-07	2.98719e-05
PLVAP	67.11	2.93172	0.661571	3.30802e-07	2.99667e-05
ITLN1	89.9567	3.0653	0.696276	3.39761e-07	3.06634e-05
ASPG	14.3296	5.85552	1.45723	3.62359e-07	3.25813e-05
DSC3	5346.42	2.46189	0.557448	3.65404e-07	3.27334e-05
ZNF578	69.5951	2.35451	0.532995	3.71532e-07	3.31596e-05
SIAH3	1646.98	1.96263	0.442799	3.75262e-07	3.33693e-05
LINC00479	26.6706	2.90885	0.651994	4.00775e-07	3.55074e-05
GUSBP4	37.504	2.57322	0.584533	4.11119e-07	3.6291e-05
CCDC122	346.367	2.11765	0.481306	4.16663e-07	3.66467e-05
LTC4S	71.2253	1.86784	0.422301	4.27468e-07	3.74608e-05
ABHD5	1105.27	1.42186	0.320555	4.45951e-07	3.89394e-05
TPRG1	335.559	2.07043	0.472849	4.68491e-07	4.07604e-05
GLI3	5987.28	1.08313	0.243344	4.8017e-07	4.16268e-05
KLK8	256.491	1.93672	0.445983	5.57097e-07	4.81233e-05
ROM1	232.584	1.54844	0.354606	5.65086e-07	4.86396e-05
AKR1B10	315.973	2.77559	0.647471	5.71884e-07	4.90502e-05
CYTH4	17.1425	4.76187	1.04237	5.78713e-07	4.94606e-05
LOC107986058	1080.41	1.72475	0.397252	6.05419e-07	5.15608e-05
ANKS1B	382.333	2.52686	0.589381	6.10442e-07	5.16793e-05
ADAMTS17	349.202	1.5149	0.348331	6.12614e-07	5.16793e-05
RSRP1	14036.8	1.76199	0.40194	6.1322e-07	5.16793e-05
LINC00842	71.7268	2.75311	0.642243	6.48884e-07	5.4495e-05
NPY	329.14	2.16314	0.504866	6.60844e-07	5.53074e-05
LURAP1L	1831.17	1.37623	0.317	6.66138e-07	5.55582e-05
TNNT3	11400.4	0.745019	0.16894	6.9119e-07	5.74495e-05
DAW1	47.9579	3.11483	0.731792	7.18535e-07	5.95178e-05
LOC105378573	24.6156	2.19439	0.508285	7.22867e-07	5.96723e-05
IRX5	456.61	1.60545	0.373151	7.26497e-07	5.9768e-05
CLCNKB	229.231	1.2041	0.277397	7.51768e-07	6.14481e-05
RPP25	366.643	1.13388	0.26058	7.52e-07	6.14481e-05
MAOA	1511.95	1.30443	0.301854	7.94986e-07	6.47418e-05
LOC105370932	27.3517	2.89654	0.679399	8.74149e-07	7.09498e-05
LINC01266	830.009	1.88683	0.443996	8.9063e-07	7.20457e-05
TYROBP	19.2318	6.15203	1.6069	9.02375e-07	7.27524e-05
KCNK6	735.082	1.56926	0.369099	9.4884e-07	7.62445e-05
EMX2	1303.25	1.63672	0.3891	1.15218e-06	9.22774e-05
PLAT	6779.72	1.46811	0.343742	1.20846e-06	9.63549e-05
CD200	1174.81	1.37954	0.32808	1.21315e-06	9.63549e-05
AFDN-DT	93.8233	2.01514	0.484159	1.21957e-06	9.63549e-05
ADAMTS3	724.467	2.00991	0.481886	1.22225e-06	9.63549e-05
SH3GL3	598.771	1.98456	0.476451	1.22301e-06	9.63549e-05
LINC02643	25.4299	3.01428	0.720928	1.23318e-06	9.67792e-05
PCDHAC2	1264.62	1.92286	0.461949	1.2364e-06	9.67792e-05
MRC1	57.6962	4.50274	1.09467	1.28156e-06	9.99858e-05
HLX	471.914	1.06562	0.251866	1.28563e-06	9.99858e-05
NEO1	12895.4	1.35623	0.322793	1.29095e-06	0.000100078
SMIM1	403.221	1.47405	0.352682	1.31041e-06	0.000101262
PENK	1474.6	1.93685	0.467693	1.40943e-06	0.000108244
BNC2	5112.36	1.00676	0.238201	1.41179e-06	0.000108244
TMEM132B	630.884	2.12378	0.516568	1.41419e-06	0.000108244
SEMA6D	5560.94	0.97712	0.231389	1.44907e-06	0.000110563
CASP12	55.1023	3.60981	0.884031	1.52942e-06	0.000116327
CCL8	20.5451	5.61286	1.2881	1.54178e-06	0.0001169
HID1	570.124	1.86844	0.45731	1.70792e-06	0.000129092
RBP7	115.214	2.70412	0.667929	1.72729e-06	0.000130149
CBLN3	141.637	1.23731	0.298392	1.74885e-06	0.000131365
GLRB	1444.96	-0.927638	0.219666	1.75815e-06	0.000131654
KNDC1	994.301	1.29945	0.316143	1.78694e-06	0.000133397
GABRA2	477.637	2.3566	0.583089	1.7976e-06	0.00013378
ASPHD1	280.374	1.99117	0.488827	1.81854e-06	0.000134923
GRB7	365.279	1.87169	0.462101	1.95844e-06	0.000144859
DCHS2	836.481	1.65147	0.40672	2.01367e-06	0.00014849
VTCN1	166.966	-2.53244	0.618712	2.02528e-06	0.000148892
SELENBP1	10113.5	0.728591	0.17456	2.10147e-06	0.000154025
NAALAD2	605.127	1.29197	0.317263	2.2238e-06	0.000162499
LY86	10.6608	7.20721	2.78361	2.33699e-06	0.000170256
SLC25A18	164.785	1.34575	0.332103	2.35915e-06	0.000171354
LOC100507387	21.9933	2.89806	0.717116	2.39592e-06	0.000173503
NFATC2	740.406	1.36684	0.33718	2.4437e-06	0.000176435
CACNG1	605.349	0.884143	0.215446	2.73458e-06	0.000196179
ACADL	802.853	-1.62366	0.401722	2.74007e-06	0.000196179
FAM221A	664.117	1.25488	0.312006	2.74149e-06	0.000196179
ANK3	3310.15	1.18208	0.29298	2.78574e-06	0.000198729
CABCOCO1	321.032	1.58377	0.395867	2.79452e-06	0.000198729
EFNA1	2195.46	1.0808	0.266681	2.80178e-06	0.000198729
HAS1	277.989	2.43639	0.623272	2.96044e-06	0.000209369
ARHGAP26	1199.13	0.941183	0.231593	3.04423e-06	0.000214667
LOC105378031	151.205	2.23208	0.571985	3.1938e-06	0.000224559
LRRN4CL	1292.33	1.75753	0.446765	3.24608e-06	0.000227573
DLK1	23417.1	1.24029	0.304997	3.37209e-06	0.000235725
ADGRB1	143.663	1.21872	0.305225	3.41989e-06	0.000238377
EYA1	4385.95	-0.988013	0.244271	3.4979e-06	0.000243114
RGCC	1473.17	3.02822	0.787991	3.54596e-06	0.000245748
GLYATL1	16.889	2.93912	0.739818	3.59867e-06	0.000248689
ALOX5	20.3114	6.19745	1.72987	3.72753e-06	0.00025686
SPHKAP	1904.65	1.76034	0.450902	4.0697e-06	0.000279642
TSPAN5	3734.62	1.00549	0.252701	4.08814e-06	0.000280113
LPAR5	384.306	3.59308	0.954008	4.17541e-06	0.000285284
OSBP2	642.419	1.1554	0.293491	4.23188e-06	0.000288328
NRG3	311.931	2.64019	0.692573	4.30356e-06	0.000292388
PITPNA	5929.92	0.972808	0.245143	4.3408e-06	0.000294092
GAS1	18487	0.884832	0.222251	4.58081e-06	0.000308946
LOC105374810	18.6059	4.41819	1.11624	4.58558e-06	0.000308946
SNX10	1709.15	1.69103	0.437559	4.61101e-06	0.000309796
LOC102724715	15.1587	5.105	1.24784	4.82278e-06	0.000323127
LOC105377504	7.773	6.66905	2.68841	4.87317e-06	0.000325093
GTF2IRD2B	921.172	0.716329	0.177631	4.87901e-06	0.000325093
WASF1	7363.5	0.589734	0.142848	5.19263e-06	0.000345039
PARD6B	4290.96	1.34809	0.351022	5.59897e-06	0.00037102
TPPP	946.743	1.80122	0.473714	5.69304e-06	0.000376223
HHIPL1	545.385	1.16539	0.301834	5.7155e-06	0.000376678
PDPN	2250.68	1.53054	0.401801	5.78598e-06	0.000380287
PLSCR4	2313.31	1.42203	0.372465	5.86348e-06	0.000384336
LRRN3	5131.79	0.859116	0.218869	5.99476e-06	0.000391879
USP51	270.12	0.89515	0.229018	6.16705e-06	0.000402055
ATP12A	8.03364	6.69898	2.71459	6.20159e-06	0.00040322
DIPK1A	2764.99	-0.581232	0.143068	6.23646e-06	0.0004044
SLC7A2	5289.33	1.09531	0.283028	6.4013e-06	0.000413332
FGF12	605.658	1.52352	0.401723	6.40838e-06	0.000413332
MOK	857.586	0.983471	0.25423	6.50938e-06	0.000417911
BBOX1-AS1	123.798	-0.898914	0.229717	6.51393e-06	0.000417911
LOC101929256	60.9053	1.93245	0.516408	6.67211e-06	0.000426926
PLEKHH2	2035.84	1.26057	0.331382	6.77582e-06	0.000432419
NLRP1	191.843	2.27216	0.612846	6.902e-06	0.000439312
CNTN4	2345.08	1.4739	0.391647	7.08616e-06	0.00044985
FAM241A	415.591	1.08275	0.283064	7.16073e-06	0.000453394
LOC102723638	11.8264	5.46182	1.58204	7.30595e-06	0.000461381
CD300LD	8.70418	6.81241	2.75943	7.35038e-06	0.000462979
LINC01515	28.385	2.31831	0.620288	7.67347e-06	0.000480825
NGEF	216.822	1.4711	0.393282	7.67349e-06	0.000480825
CNN2	7099.26	-0.664346	0.168144	7.97656e-06	0.000498525
HPSE2	426.363	1.36137	0.363588	8.02591e-06	0.000500316
MME	9729.19	1.50443	0.398207	8.17802e-06	0.000508488
CD86	14.1597	5.55302	1.66783	8.60911e-06	0.000533029
RNASE6	24.8847	4.10245	1.10318	8.61678e-06	0.000533029
RGS11	131.612	1.60746	0.433309	8.64992e-06	0.000533713
RIMBP2	280.526	1.0582	0.280105	8.67282e-06	0.000533765
LOC105369544	43.2521	2.78615	0.760699	8.91356e-06	0.000547188
PPP1R14A	242.374	-1.16158	0.307056	9.04358e-06	0.000553764
CAV1	2627.05	1.80009	0.488474	9.14803e-06	0.000557606
CMAHP	114.897	3.01068	0.838595	9.15242e-06	0.000557606
FAM198B-AS1	129.858	2.65101	0.734652	9.20906e-06	0.000559647
PANCR	226.458	-1.71232	0.460547	9.76289e-06	0.000590818
LOC105375508	51.304	1.97854	0.54278	9.77083e-06	0.000590818
CD84	6.53397	6.34346	2.64956	9.88894e-06	0.000596468
PHACTR2	5698.2	0.763855	0.199421	1.00175e-05	0.000602719
KIAA1107	320.824	0.893205	0.236103	1.01e-05	0.000606174
LOC105373283	6.62636	6.36441	2.6589	1.03395e-05	0.000619015
RND3	11818.8	-0.668296	0.171598	1.04362e-05	0.000623262
VSIG4	53.247	3.96412	1.10809	1.05721e-05	0.000629821
ST3GAL1	2053.01	1.14687	0.307408	1.0853e-05	0.00064497
NECAB1	1977.53	0.787159	0.207212	1.09506e-05	0.00064917
EPHA6	288.171	2.0343	0.56674	1.10499e-05	0.000653459
MGAT4C	1349.72	1.50905	0.414931	1.12224e-05	0.000662038
SFRP5	54.4086	3.45429	0.970028	1.13878e-05	0.000670164
CRB2	866.631	2.01354	0.560075	1.16633e-05	0.000684711
COL6A6	1988.07	1.04938	0.283473	1.18682e-05	0.000695053
FAM83B	296.85	2.07334	0.580963	1.23453e-05	0.000720025
TMEM37	1216.11	1.51216	0.416214	1.23542e-05	0.000720025
HSPB7	4734.5	1.29127	0.355335	1.26754e-05	0.00073529
LOC642366	115.737	1.87644	0.524923	1.26903e-05	0.00073529
TMEM150C	294.864	-0.861699	0.229332	1.27073e-05	0.00073529
CERS3	39.4412	2.42747	0.677448	1.31582e-05	0.000759562
LOC100129434	146.051	2.81174	0.805394	1.38176e-05	0.000795729
CD68	460.556	1.2844	0.355912	1.38898e-05	0.00079799
MGP	22782.6	1.62246	0.448595	1.40876e-05	0.000806901
ZNF385D	1383.91	1.53557	0.429819	1.41117e-05	0.000806901
SEPTIN6	2829.75	-0.658123	0.172919	1.4327e-05	0.000817279
TPRN	469.41	1.21242	0.335277	1.44221e-05	0.000820771
LOC105373918	8.74361	4.92232	1.51845	1.46676e-05	0.000832782
CLMP	4052.69	0.794876	0.214064	1.51085e-05	0.000853976
CADM3	200.01	2.18175	0.623575	1.51115e-05	0.000853976
LOC100507351	157.581	2.47089	0.709753	1.54245e-05	0.00086963
STAT4	231.967	1.39621	0.391937	1.54743e-05	0.000870409
LIPG	653.545	-1.17923	0.324725	1.60029e-05	0.000898054
MAP3K8	1391.74	1.47849	0.417178	1.60448e-05	0.000898321
EML3	1092.79	1.17485	0.327011	1.64635e-05	0.000919638
LOC101929657	61.1562	2.16604	0.624898	1.6842e-05	0.000938611
KLK10	167.711	1.99863	0.57644	1.82492e-05	0.0010147
AMPD2	4792.51	0.697949	0.187614	1.86037e-05	0.00103204
NCF4	9.11792	6.80432	2.84216	1.8667e-05	0.00103318
GRM7	604.022	1.70822	0.490282	1.88468e-05	0.00104075
LRRC2-AS1	6.44053	6.26634	2.68536	1.9569e-05	0.00107817
MCC	4184.97	0.788205	0.216313	1.99349e-05	0.00109583
MAN1A1	7581.98	1.59756	0.455887	2.00077e-05	0.00109734
PTK2B	854.094	0.803286	0.221584	2.08297e-05	0.00113984
LCN1	15.2128	4.91012	1.37063	2.09584e-05	0.00114429
HSBP1L1	310.535	1.68739	0.489512	2.11114e-05	0.00115005
BCAS1	296.101	2.31096	0.683248	2.19493e-05	0.00119301
FPR1	8.34998	4.88102	1.53619	2.22232e-05	0.00120519
PXK	3389.32	0.873911	0.243593	2.24719e-05	0.00121595
FAM41C	19.6931	4.12239	1.19075	2.25984e-05	0.00122006
GALNT9	115.333	1.6793	0.490769	2.33499e-05	0.00125783
PAM	14825.3	-0.703208	0.189083	2.343e-05	0.00125933
HOOK1	1311.95	1.40892	0.407053	2.35192e-05	0.00126133
PLCB1	2169.24	1.01162	0.288978	2.36709e-05	0.00126666
ANXA8	415.283	3.48925	1.06532	2.37659e-05	0.00126893
PERP	2796.11	1.57849	0.461542	2.40771e-05	0.00128272
HES1	1994.49	-0.823501	0.229141	2.46552e-05	0.00131063
FHL2	2091.53	-0.746413	0.205694	2.50326e-05	0.00132777
CGNL1	1900.95	1.3298	0.383103	2.51383e-05	0.00133046
NDFIP2	9602.59	0.860351	0.24225	2.53442e-05	0.00133843
CACNB4	174.374	0.882212	0.248653	2.55308e-05	0.00134535
GRID1	115.736	1.18043	0.340493	2.56334e-05	0.00134781
SMKR1	31.8752	3.00795	0.893114	2.59085e-05	0.00135932
CGB7	68.074	1.33112	0.387216	2.65607e-05	0.00138842
ZNF641	1158.96	0.908139	0.257938	2.65778e-05	0.00138842
LOC105377369	33.0924	3.73125	1.14212	2.68476e-05	0.00139894
P2RX3	332.404	-1.08439	0.309276	2.6895e-05	0.00139894
LINC01018	125.977	2.1417	0.640933	2.71426e-05	0.00140879
FMOD	3387.3	1.86255	0.554206	2.73047e-05	0.00141417
EFNA5	13657.5	0.932812	0.263012	2.7575e-05	0.00142512
LOC105378798	17.0179	5.12625	1.45549	2.77373e-05	0.00143045
VWC2	132.762	1.85399	0.552786	2.78691e-05	0.00143419
LOC105369898	391.717	-1.40262	0.406548	2.80989e-05	0.00144295
ALX4	179.869	2.07589	0.624974	2.82478e-05	0.00144717
LOC107986774	17.2478	3.87152	1.14507	2.83008e-05	0.00144717
PRKCG	116.463	2.49133	0.754571	2.84389e-05	0.00145117
LOC105377705	19.1464	2.74963	0.810267	2.85849e-05	0.00145554
LINC02323	39.161	1.60241	0.473134	2.90711e-05	0.00147719
LOC728755	41.7297	2.05898	0.614294	2.97954e-05	0.00151082
KCTD16	337.89	0.845245	0.241164	3.03687e-05	0.00153667
RGS7	313.056	-1.72073	0.505512	3.06559e-05	0.00154796
EZR	19726.2	1.17357	0.344745	3.13574e-05	0.00158009
KRT5	124.705	2.79934	0.864277	3.17825e-05	0.00159818
ZNF185	1114.61	1.1515	0.338914	3.25855e-05	0.00163515
LINC00680	12.9314	4.33008	1.2057	3.31433e-05	0.00165971
IGFBP3	15125.6	0.572209	0.157346	3.33185e-05	0.00166503
RSPO1	299.683	1.45579	0.436097	3.38746e-05	0.00168927
LOC105378747	12.6323	3.06644	0.902447	3.39432e-05	0.00168927
RUNX1T1	7173.14	0.494267	0.133697	3.40266e-05	0.00168994
LOC105376861	43.5717	1.76342	0.533586	3.47449e-05	0.00172208
CAMSAP3	164.779	1.31082	0.391204	3.49803e-05	0.00172909
SULT4A1	725.729	-1.07305	0.312426	3.50294e-05	0.00172909
MAF	6311.85	0.999106	0.292258	3.51617e-05	0.00173209
LRRN2	1465.01	1.26075	0.376275	3.57101e-05	0.00175553
NR1D1	498.345	1.23701	0.368064	3.63255e-05	0.00178216
CD163L1	44.3263	2.74447	0.850147	3.65597e-05	0.00178789
LOC107986882	11.353	4.50184	1.29293	3.65902e-05	0.00178789
MID1	8299.97	-0.594577	0.166567	3.68386e-05	0.0017964
CNTN6	944.567	1.75391	0.53593	3.78351e-05	0.00184128
LOC107985900	35.0298	2.42158	0.753334	3.86448e-05	0.00187691
SLC7A8	2666.18	1.32388	0.399554	3.88372e-05	0.00188247
LOC105376944	10.699	4.48426	1.283	4.08692e-05	0.00197701
NSG1	1317.48	1.22098	0.368605	4.13485e-05	0.0019962
PDZRN3-AS1	447.21	0.814828	0.237416	4.17434e-05	0.00201125
LGALS12	19.9419	2.5665	0.788022	4.23902e-05	0.00203835
GULP1	4139.69	1.32968	0.40456	4.26284e-05	0.00204574
LARGE2	88.4631	1.56679	0.481006	4.27663e-05	0.00204774
DUOXA1	46.0126	2.58142	0.805931	4.28393e-05	0.00204774
CLPSL1	8.21039	4.79566	1.59515	4.36491e-05	0.00208233
C16orf54	10.719	4.49989	1.2902	4.39826e-05	0.00209411
IGSF9B	177.112	1.5645	0.482238	4.47302e-05	0.00212552
TRNP1	2315.39	1.47221	0.453514	4.52375e-05	0.00214541
MOCS1	427.07	-0.874545	0.256553	4.57813e-05	0.00216695
HHEX	10.344	4.36995	1.27274	4.60269e-05	0.00217432
GPR19	141.059	-0.834303	0.244122	4.6599e-05	0.00219706
IRX6	137.702	2.56319	0.816261	4.70776e-05	0.00221531
IP6K3	655.369	-1.04785	0.312594	4.77206e-05	0.0022412
PDE4B	1090.88	1.07849	0.326111	4.79469e-05	0.00224747
GNG4	294.711	1.37005	0.423202	4.88298e-05	0.00228442
AKR1C1	435.935	-0.860089	0.253902	5.02353e-05	0.00234564
CPAMD8	2169.92	0.816705	0.24197	5.0567e-05	0.00235245
BRINP2	84.4801	2.41874	0.77152	5.05757e-05	0.00235245
PARD3B	1000.8	0.971203	0.292981	5.07218e-05	0.00235472
LINC02121	30.1357	2.09082	0.655875	5.1574e-05	0.00238969
SLAIN1	595.07	1.08664	0.330687	5.23028e-05	0.00241464
DAPK1	8982.76	0.698642	0.203756	5.23823e-05	0.00241464
SMIM32	20.2361	2.47145	0.77621	5.24119e-05	0.00241464
CCR1	16.359	5.01211	1.51363	5.27569e-05	0.00242592
PTGDS	4553.56	1.02334	0.311466	5.3493e-05	0.00245509
GABRB3	2568.58	-0.755765	0.221285	5.36714e-05	0.00245862
LINC01016	30.2263	2.55196	0.810051	5.44396e-05	0.00248909
COL14A1	23821.5	1.37496	0.420655	5.53128e-05	0.00252425
SLC26A4-AS1	18.5639	5.16297	1.58193	5.55351e-05	0.00252962
TCF23	284.38	2.02424	0.648539	5.56433e-05	0.00252978
COL8A2	3467.67	1.41544	0.441962	5.59673e-05	0.00253974
CTNNA3	438.335	1.82351	0.584038	5.8865e-05	0.00266476
PDE2A	513.12	-0.92339	0.278019	5.90096e-05	0.00266476
SLC45A4	398.269	0.938005	0.285798	5.90529e-05	0.00266476
LINC02433	6.7064	6.21188	2.79294	5.9324e-05	0.00267201
CD163	120.53	3.77447	1.26974	5.94959e-05	0.00267477
HTR1E	29.1334	3.06859	0.987203	6.02693e-05	0.00270056
IFNL4	14.9146	2.4815	0.773475	6.02928e-05	0.00270056
CKAP2L	2489.01	-0.795794	0.236915	6.04303e-05	0.00270172
PLA2G2A	1768.93	3.70115	1.2516	6.07516e-05	0.00270839
CCKBR	61.119	3.24179	1.07849	6.08035e-05	0.00270839
USH1G	115.535	1.42916	0.453969	6.22641e-05	0.00276835
GADD45A	3297.45	-0.62287	0.181269	6.3765e-05	0.00282988
SLC8A2	159.709	2.27385	0.74343	6.42802e-05	0.00284658
LOC105371308	42.3799	1.32555	0.416804	6.43767e-05	0.00284658
SIGLEC9	14.4302	4.72022	1.47269	6.49609e-05	0.00286717
SARAF	21836.7	0.839669	0.257423	6.51465e-05	0.00287012
CRLS1	3951.91	0.549008	0.158575	6.53099e-05	0.0028702
CAPSL	19.2393	2.5384	0.809038	6.53855e-05	0.0028702
RORC	127.633	2.25804	0.740955	6.6176e-05	0.00289963
CLRN1-AS1	11.4697	6.9892	3.07613	6.87985e-05	0.0030091
SLITRK2	387.059	1.47854	0.474629	6.89567e-05	0.00301057
C15orf56	8.61341	4.80004	1.67329	7.11591e-05	0.00310113
PRPS2	2380.17	1.18573	0.371119	7.23334e-05	0.00314663
THEMIS2	322.7	-1.03337	0.319832	7.24961e-05	0.00314805
COLCA1	58.9902	2.52819	0.842999	7.37173e-05	0.00319534
SARM1	294.928	0.710247	0.213765	7.40617e-05	0.00320453
LOC105379127	14.9901	4.19136	1.3532	7.47671e-05	0.00322927
EFNB2	1380.89	1.11545	0.351087	7.5733e-05	0.00326435
B3GNT7	220.876	1.43284	0.462909	7.58492e-05	0.00326435
ADORA1	367.253	-1.10483	0.345276	7.72464e-05	0.00331858
SLC39A8	2461.49	1.54791	0.503625	7.94151e-05	0.00340026
LOC105370560	53.7517	1.70902	0.561855	7.9429e-05	0.00340026
TEPP	149.338	1.62942	0.533927	8.01236e-05	0.00342394
FAM53A	233.067	1.00176	0.316045	8.08713e-05	0.00344979
TSTA3	135.437	1.88764	0.624863	8.12037e-05	0.00345788
ADAM8	172.354	1.73513	0.571562	8.2294e-05	0.00349815
LOC107986276	7.16922	6.26906	2.86	8.27384e-05	0.00350717
LOC105372945	90.4834	-1.76776	0.570179	8.27963e-05	0.00350717
LY6E-DT	44.6143	1.22485	0.39228	8.4562e-05	0.0035757
AQP3	1109.12	0.858927	0.26848	8.57546e-05	0.0036198
TIGD4	94.3306	1.36232	0.444232	8.86442e-05	0.00373526
GJC2	41.4006	1.75732	0.582054	8.96169e-05	0.00376968
MYBPC2	4479.11	0.612597	0.184156	9.08969e-05	0.00379749
KCNA4	183.401	2.13371	0.722606	9.11301e-05	0.00379749
HAUS8	643.875	-0.631082	0.189524	9.11301e-05	0.00379749
CHRM1	40.7049	2.33123	0.784129	9.11425e-05	0.00379749
LOC105376825	12.9176	3.65622	1.19986	9.1149e-05	0.00379749
DENND3	319.181	1.12643	0.363917	9.12202e-05	0.00379749
SPRY2	3090.02	0.611163	0.185621	9.17953e-05	0.00381487
ILVBL	4725.02	0.568191	0.173113	9.26693e-05	0.00384458
SPON1	3936.83	1.12276	0.363032	9.29974e-05	0.00385159
LOC105369591	27.0923	1.71302	0.564194	9.41936e-05	0.00389446
SERPINB7	128.767	1.58367	0.529165	9.44498e-05	0.00389839
LOC112268078	9.72773	-0.0950283	0.260952	9.49444e-05	0.00391213
GLP2R	11.4417	6.93648	3.11725	9.51785e-05	0.0039136
HPCAL4	220.813	2.07627	0.705482	9.53037e-05	0.0039136
MIR4697HG	112.722	1.86711	0.630162	9.78115e-05	0.00400335
ARHGEF3	5074.87	0.815185	0.256526	9.78202e-05	0.00400335
SATB1-AS1	14.8876	2.92504	0.967052	9.87726e-05	0.00403549
TMX1	9237.09	-0.387121	0.108974	9.94308e-05	0.00405553
MRGPRF-AS1	24.3968	2.54577	0.85835	0.00010029	0.00408371
ATP1B4	528.748	1.9223	0.653924	0.000102341	0.0041602
MIR3936HG	55.3801	1.15465	0.377787	0.00010317	0.00418467
NUF2	2331.86	-0.860788	0.271093	0.000103407	0.00418467
MEGF10	17741.4	-0.962385	0.306409	0.000103462	0.00418467
DNAJC6	868.171	1.41235	0.468199	0.000104454	0.00421231
CCDC152	47.8759	1.84534	0.628905	0.000104494	0.00421231
PLCH2	31.8645	1.71428	0.571856	0.000106003	0.00426016
DOCK2	39.9206	2.72767	0.94673	0.000106033	0.00426016
CLUL1	115.852	1.91218	0.654109	0.000108171	0.00433887
LEPROTL1	5957.15	0.64189	0.198791	0.00010935	0.00437891
APLP1	4039.96	1.26307	0.421089	0.000111338	0.00445115
VNN2	42.9644	3.01682	1.0607	0.000112202	0.00447828
SFTPD	73.4354	1.35285	0.45392	0.000112716	0.00449139
AGPAT4	1847.39	-0.644359	0.198558	0.000114562	0.00455743
SERPINB9	1488.81	1.34776	0.454242	0.000116012	0.00460754
TMEM119	4575.72	-0.555539	0.167661	0.000116971	0.00463801
YPEL2	1653.51	1.05617	0.34451	0.000118875	0.00470579
PCDHB5	2289.7	0.795352	0.25681	0.000122423	0.00483832
DRGX	10.3893	5.01353	1.84255	0.000123009	0.00484689
MEG8	31.9923	2.26989	0.793167	0.000123041	0.00484689
TNFRSF10D	1915.06	-0.651827	0.202032	0.000123585	0.0048604
BORA	763.647	-0.592505	0.181747	0.00012611	0.00495164
LINC00922	9.85292	3.68528	1.2056	0.000126697	0.00496666
MTMR7	224.233	1.45192	0.496917	0.000128017	0.00501026
CHN1	2146.81	-0.491934	0.14686	0.000128468	0.0050198
AQP9	45.6073	2.84654	1.01686	0.000130437	0.0050885
MSC-AS1	888.59	-0.658821	0.205645	0.000131638	0.00512709
MYOCD-AS1	5.51941	5.80636	2.7746	0.000132012	0.00513338
NKX2-5	2194.85	-1.52723	0.516255	0.000132906	0.00515987
LOC101928228	7.00763	6.16347	2.90542	0.000134255	0.00520387
PLEK2	161.345	2.37603	0.8515	0.000135056	0.00522657
PBX1	5245.16	0.490806	0.147689	0.000135684	0.00524249
TNFRSF8	31.0592	2.42501	0.858523	0.000137753	0.00531394
CNRIP1	1607.11	0.691643	0.219793	0.000138587	0.00533758
ADAM33	2082.67	1.35343	0.460681	0.000140901	0.00541216
KIRREL2	618.864	1.03902	0.348118	0.000140971	0.00541216
LIN28B	219.23	-1.51256	0.514348	0.000141618	0.00542838
LINC01550	228.194	1.38803	0.47998	0.000143487	0.00549134
MYO1D	1667.26	1.08204	0.366041	0.000144483	0.0055207
LOC105376924	10.7692	4.37574	1.4395	0.00014646	0.00558742
SLIT3	15890.5	1.51154	0.51976	0.000146764	0.00559019
ZNF528-AS1	147.509	1.68452	0.593504	0.000147563	0.00561182
SERPINA1	39.8187	-2.50098	0.867225	0.000148044	0.00562127
GPR85	317.937	1.39914	0.485693	0.00015041	0.00570213
CHD5	19.4978	3.01891	1.06711	0.000151804	0.00574598
CYP2S1	144.764	1.62462	0.57298	0.000152885	0.00577785
LINC02751	5.52694	5.78525	2.79708	0.000157515	0.00594331
BMP7	884.112	-0.858085	0.281793	0.000157754	0.00594331
DNAJC12	800.952	-0.55661	0.172581	0.000159267	0.00599096
SNAP91	550.951	1.20895	0.417555	0.000161092	0.00605022
ECT2	5370.59	-0.701611	0.226261	0.00016227	0.00608501
PHLDB2	9279.06	-0.534457	0.16544	0.000164101	0.00614415
BRPF3	2028.08	0.536004	0.166449	0.000164855	0.00616281
ENTPD2	34.9679	1.81367	0.645291	0.000166013	0.00619555
PCDHGB4	3944.74	0.614297	0.193752	0.000166243	0.00619555
FXYD1	1178.23	0.545466	0.170391	0.000169384	0.00630291
PARM1	53399	0.752746	0.245322	0.000171899	0.00638667
CCDC140	18.7545	-0.179588	0.352676	0.000173318	0.00642952
JCAD	1016.5	1.20245	0.42038	0.000175006	0.00648218
RPLP0P2	138.996	-1.55555	0.541626	0.00017648	0.00652677
ELAVL3	116.963	1.54589	0.554983	0.00017731	0.00654749
BBS12	1271.66	0.45514	0.138403	0.000177611	0.0065486
PTPRF	15574.3	0.818482	0.274063	0.00017986	0.00662141
LOC105374664	25.1261	1.64731	0.586546	0.000182488	0.00670795
TBC1D31	1058.05	-0.626397	0.200413	0.000183008	0.00670997
HLF	155.553	1.76128	0.64003	0.000183098	0.00670997
IQCA1	358.129	1.57507	0.566801	0.000183899	0.00672916
TEX14	356.652	0.867062	0.293487	0.000186324	0.00680759
SLC6A5	12.2317	3.34185	1.18074	0.00018791	0.00685518
LOC107985238	6.67653	6.03048	2.92534	0.000189318	0.00689615
IQGAP3	840.277	-0.792297	0.263513	0.000194441	0.00707208
CLEC7A	7.04952	4.29066	1.72181	0.00019499	0.00708017
CORO2B	533.06	0.994364	0.344721	0.000195248	0.00708017
MTUS1	1405.59	0.865283	0.299243	0.000195954	0.00709512
FBXO2	732.348	1.54732	0.562606	0.000197264	0.00713187
ADAM15	2742.28	0.863275	0.293447	0.000198535	0.00716713
TAFA4	141.544	1.18359	0.419886	0.000201339	0.00725752
MSC	4229.63	-1.02903	0.35369	0.000202221	0.00727846
MAP2	2286.54	1.17621	0.418214	0.000204845	0.00736193
LRRC4C	1497.02	1.03567	0.363315	0.000206829	0.0074222
CHGB	216.392	1.43754	0.523518	0.000209227	0.00749714
GRIN2A	1873.84	2.38201	0.905828	0.000210801	0.00754236
TNFSF14	14.278	3.06674	1.12763	0.000211824	0.00756778
GDF6	849.679	2.39776	0.919192	0.000212653	0.0075862
IGLON5	230.047	0.989832	0.346483	0.000213594	0.00760855
VNN1	9.58995	4.18339	1.43503	0.000217063	0.00772075
PRODH2	17.145	2.44169	0.889937	0.000217666	0.00772387
CAV2	2932.25	1.27196	0.459591	0.00021779	0.00772387
MCF2L2	118.801	1.24355	0.447412	0.000218892	0.00774454
CPLX1	54.0335	1.66138	0.615109	0.000219013	0.00774454
CDCP1	877.822	1.62993	0.604718	0.000219859	0.00776309
GATA2	198.635	-1.19844	0.422021	0.000220861	0.00778712
FAM178B	65.4136	1.5127	0.555041	0.000223179	0.00785738
COL25A1	19990.5	-0.921789	0.31704	0.00022484	0.00789658
YBX2	61.5225	1.20603	0.432549	0.000224945	0.00789658
PDE5A	2338.8	0.995692	0.35149	0.000226324	0.00792701
RERG-AS1	32.5853	2.42948	0.921013	0.000226467	0.00792701
EMID1	1653.2	0.802304	0.275191	0.000229743	0.00803004
C1QTNF4	93.4965	0.912881	0.317895	0.00023041	0.00804173
EPHA2	915.726	-0.477411	0.14981	0.000235999	0.00822492
CACNA1C	948.972	1.1361	0.410328	0.000237678	0.00827155
LOC107984138	256.58	-1.1058	0.391054	0.000238321	0.00827946
SPATA6	1231.78	0.828375	0.286517	0.00023859	0.00827946
TNFRSF19	3323.33	-0.622019	0.204308	0.000239816	0.00831007
LOC107985716	12.2448	3.29671	1.21215	0.000240778	0.00832423
MS4A10	22.0505	3.44674	1.35959	0.000240913	0.00832423
SLC22A15	217.496	1.05705	0.378631	0.000243259	0.00839331
TTLL10	36.4311	2.12268	0.813147	0.000243851	0.00839639
TSPAN32	47.3836	1.54589	0.571665	0.000244043	0.00839639
BDNF-AS	210.459	0.905763	0.319725	0.00025047	0.00859967
ITGA9	1376.39	-0.866305	0.299821	0.000250662	0.00859967
SNCA	2938	0.66163	0.222598	0.000254176	0.00870788
MTNR1A	25.3443	1.7908	0.668531	0.000255673	0.00874676
CSDC2	992.086	1.00348	0.360327	0.000257589	0.00879985
BASP1-AS1	38.1373	2.13364	0.816609	0.00026094	0.00890167
ENPP2	7910.51	1.28861	0.470819	0.000261305	0.00890167
LOC107986015	32.6359	-2.18838	0.813731	0.000263023	0.00894759
BMPER	545.682	1.26206	0.467699	0.000264196	0.00897488
GRIK1	552.996	1.17537	0.430339	0.000265527	0.00900744
CCNB1	8068.05	-0.475398	0.150754	0.000266447	0.009026
SOX6	5067.46	0.761149	0.267453	0.000267374	0.00904473
ARHGEF4	788.949	0.742766	0.25648	0.000270254	0.00911247
NPR1	421.464	1.25392	0.463073	0.000270275	0.00911247
NHSL2	1069.52	0.699278	0.23903	0.000270507	0.00911247
KIF18A	3072.69	-0.728502	0.248243	0.000273012	0.00918406
NCOA7	4536.47	-1.18722	0.429267	0.000273515	0.0091882
P2RY14	265.369	-1.70383	0.6312	0.000275692	0.0092485
IL37	14.4725	3.75797	1.42898	0.000277815	0.00930679
LRP4	2675.67	0.622312	0.209872	0.000282959	0.00946601
IL11	100.318	1.25147	0.464698	0.00028546	0.00953649
LOC107985020	58.0731	1.53274	0.58458	0.000286247	0.0095496
ANGPT1	1274.54	1.37645	0.518842	0.000287147	0.00955294
ARHGAP11B	51.1071	-1.709	0.636828	0.000287355	0.00955294
HJURP	3884.59	-0.831169	0.290679	0.000287532	0.00955294
UBE2C	5890.31	-0.781015	0.270896	0.000287964	0.00955416
RHOBTB1	5048.35	0.598707	0.199637	0.00028973	0.0095996
LOC101928636	13.9487	4.13339	1.53551	0.000293387	0.00970745
KCNE3	173.738	1.06254	0.390642	0.00029436	0.00971508
UGT2B11	4.99118	0.105774	0.267845	0.000294901	0.00971508
CTDSPL	2106.23	0.594524	0.202386	0.000295134	0.00971508
ARHGAP20	566.517	0.76749	0.269449	0.000295447	0.00971508
MASTL	1712.54	-0.66974	0.225944	0.000295626	0.00971508
FAM153A	26.1935	2.88792	1.14375	0.000298392	0.00979268
IL13RA2	23.5289	2.83944	1.1374	0.000299998	0.00982273
WNT7B	60.3531	2.11792	0.83789	0.00030012	0.00982273
KCNK1	685.242	1.53945	0.592179	0.000300961	0.00982899
LOC107986838	13.1812	2.33667	0.894368	0.000301124	0.00982899
CLTRN	92.6444	-1.03996	0.37635	0.000303153	0.00986373
LOC107984435	16.4394	2.39449	0.920733	0.00030323	0.00986373
SSTR5-AS1	13.2504	2.90737	1.12591	0.000303412	0.00986373
FERMT1	81.2385	1.45785	0.557433	0.000305001	0.00989652
LOC105372249	264.998	-0.844457	0.298345	0.000305238	0.00989652
EPS8L1	281.405	1.75207	0.687479	0.000307465	0.00995536
SPX	70.364	-1.24477	0.458766	0.000308629	0.0099797
TPGS2	5804.71	-0.399624	0.124707	0.000311706	0.0100657
SHANK1	346.24	1.42638	0.54998	0.000317265	0.0102316
LY6H	67.6666	2.53162	1.04392	0.000319051	0.0102704
PLP2	3152.31	0.844881	0.301851	0.000319316	0.0102704
EGR2	2382.38	-1.52561	0.573162	0.000321867	0.0103367
CERS3-AS1	30.1484	2.42242	0.976133	0.000322233	0.0103367
SLC25A51	479.125	-0.568689	0.189955	0.000324023	0.0103803
TMEM38B	9739.11	-0.660275	0.227187	0.000324782	0.0103909
CHRNA3	547.336	2.96006	1.26127	0.000329291	0.0105212
TEX15	249.513	1.32321	0.50846	0.000329945	0.0105282
LRRK2	110.833	1.64754	0.646106	0.000331139	0.0105524
SLC35E4	326.26	1.05474	0.394817	0.000336657	0.0107141
UNC5B-AS1	61.0932	2.06049	0.82803	0.000337258	0.0107191
TPO	9.63751	3.36764	1.23335	0.000340021	0.0107928
GPR158	27.6241	3.12357	1.33287	0.000340771	0.0108024
LOC105375304	138.301	1.45069	0.566912	0.000348562	0.0110349
CDK1	9939.5	-0.599822	0.201147	0.000353703	0.011183
TEX22	34.556	1.20704	0.459191	0.000354536	0.0111913
LOC101928882	32.3201	1.48932	0.577581	0.000354889	0.0111913
CYP26A1	7.16534	0.0757881	0.249468	0.000356261	0.0112199
ADAMTSL5	689.028	0.805795	0.291892	0.000358209	0.0112666
RPRM	632.628	0.839947	0.306931	0.000360669	0.0113236
LOC105377383	8.26419	3.82292	1.42423	0.000360958	0.0113236
ZNF536	1125.7	-0.939199	0.344974	0.000362715	0.011364
LRRN1	29918.5	-0.594818	0.202862	0.000365611	0.0114399
CYB5R2	1215.56	0.809809	0.295974	0.000367013	0.0114689
JPH4	1114.16	0.769823	0.27778	0.00036787	0.0114809
SLC18A3	99.4535	2.22275	0.919154	0.00036841	0.0114829
C1QTNF12	224.386	1.24266	0.482357	0.000373991	0.0116418
DNAJC15	3739.13	-0.642575	0.219595	0.000376702	0.0117112
KPNA2	20438.4	-0.575498	0.19267	0.000378184	0.0117421
BUB1	4232.73	-0.689878	0.242027	0.000384423	0.0119159
FEZF1-AS1	17.9617	2.42199	0.982681	0.000384765	0.0119159
TTK	3805.9	-0.719987	0.256471	0.000390234	0.0120698
EPPK1	346.499	0.946962	0.358487	0.00039455	0.0121877
CCNB2	4633.12	-0.651974	0.22808	0.000395091	0.0121889
COL13A1	959.962	-0.8184	0.297398	0.000398404	0.0122754
PANX2	60.8044	2.24901	0.945389	0.000399518	0.0122941
LOC105370769	6.95031	0.0752069	0.249158	0.000402465	0.0123566
GTSE1	1930.91	-0.669215	0.235537	0.00040257	0.0123566
TMEM196	550.184	3.85093	1.84287	0.000404304	0.0123941
LOC101927359	181.741	0.965466	0.366853	0.000409356	0.012533
LOC105370469	1439.46	0.551143	0.188982	0.000412078	0.0126004
BARX2	280.066	-1.483	0.578472	0.000418086	0.012768
SLC25A22	1391.48	0.472757	0.157395	0.000418665	0.0127696
LINC01426	40.4805	-1.91556	0.759192	0.000420087	0.0127968
NDC80	3380	-0.741731	0.267252	0.000421227	0.0128154
TSPAN13	6577.53	0.694563	0.249726	0.000421873	0.0128189
MEIS2	3590.99	0.781641	0.28581	0.000426447	0.012929
KLK7	216.423	1.13972	0.445446	0.000426565	0.012929
SSTR3	484.437	1.23846	0.492317	0.000429724	0.0129978
KCTD14	11.1307	2.43452	0.962197	0.00042991	0.0129978
RAD51AP1	3573.61	-0.659254	0.233684	0.0004323	0.0130537
LINC02234	14.6539	3.21882	1.33217	0.000435598	0.0131311
PUS1	263.121	-0.620392	0.217565	0.000436388	0.0131311
P2RY6	71.5293	1.7878	0.740359	0.000436492	0.0131311
CD300C	5.3468	0.0898003	0.257114	0.000438247	0.0131676
ATP1A3	146.41	1.06712	0.416887	0.000449928	0.0135017
ARHGAP36	439.52	1.04295	0.407649	0.000454266	0.013615
LINC01208	9.50327	2.51148	0.993823	0.000458591	0.0137277
SEMA3C	11028.4	0.864112	0.325412	0.000460612	0.0137711
EPHB6	469.964	0.805793	0.302289	0.000462664	0.0138154
PRKG1	5671.21	0.55018	0.189102	0.000470605	0.0140352
NTF3	639.958	-0.545211	0.188702	0.00047302	0.0140876
LOC112267901	14.7274	2.61801	1.08735	0.000473527	0.0140876
IGIP	107.662	0.986857	0.385297	0.000481817	0.0143002
DUSP23	481.584	0.931064	0.35999	0.000481855	0.0143002
CAMK1G	76.0551	0.929529	0.359162	0.000490109	0.0145273
FAIM2	878.901	0.906061	0.34633	0.000497158	0.0147182
DGKI	147.137	0.749548	0.279793	0.000502391	0.0148536
MNDA	8.47791	0.062319	0.243329	0.000502959	0.0148536
FAR2P2	551.296	0.646228	0.234831	0.000504839	0.0148909
CPED1	1872.9	1.14093	0.460053	0.000508571	0.0149827
GPRASP1	1350.97	0.582967	0.207397	0.000510389	0.015018
LINC02347	4.81635	0.0928965	0.258929	0.000526886	0.0154846
ERMAP	727.513	0.540916	0.189969	0.000527763	0.0154915
PDLIM4	6331.79	-0.617198	0.222519	0.000528454	0.015493
STAT5A	1671.69	0.52966	0.185375	0.000529932	0.0155175
MPP5	3438.82	0.697074	0.26271	0.000532058	0.0155609
RASL12	875.279	-0.66909	0.244266	0.000534011	0.0155992
CDC25C	1729.65	-0.810614	0.306238	0.000539929	0.015744
LOC653712	27.6993	1.21362	0.488491	0.000540272	0.015744
FMN2	855.867	-0.658017	0.2389	0.000543191	0.0158101
NPPB	16.0837	-0.144555	0.303672	0.000548367	0.0159415
LOC102724019	94.5937	1.49929	0.637418	0.000549894	0.0159667
SLAMF9	30.4231	1.95109	0.83693	0.00055286	0.0160336
FZD5	1032.64	0.935391	0.370213	0.000557417	0.0161464
LOC107986453	5.19249	3.75285	1.74206	0.00055827	0.0161518
LOC107985362	51.6617	-0.182734	0.355598	0.000561268	0.0162032
MGAT4B	2201	0.748907	0.284412	0.000561387	0.0162032
LOC643542	12.3909	0.0661556	0.244943	0.000566472	0.0163305
KCNMA1	2519.01	-0.483638	0.166764	0.000569605	0.0163902
SLC38A4	1300.46	-0.713017	0.266176	0.0005699	0.0163902
PRSS33	9.01793	3.81391	1.57378	0.000573837	0.0164838
PLIN2	4547.09	0.602603	0.219856	0.000575809	0.0165209
TCIRG1	1267.16	0.985659	0.396655	0.000581299	0.0166586
SKA1	43.8542	-1.80008	0.75116	0.000586544	0.016789
KLHDC7A	13.9553	-0.0888587	0.256776	0.000591432	0.0169089
B3GALT2	2991.73	0.723289	0.278649	0.000596988	0.0170476
LOC105373730	27.7429	-2.30292	0.983414	0.000605815	0.0172726
LOC107987152	19.0307	2.71882	1.24774	0.000606293	0.0172726
HMMR	1480.37	-0.743463	0.281215	0.000609727	0.01735
ESRRG	236.098	1.24598	0.52461	0.000610923	0.0173636
SIPA1L2	3039.81	0.844363	0.332502	0.000613244	0.0174091
ERICH3	196.45	2.94798	1.45605	0.000614653	0.0174286
PIP5K1B	36.0388	2.40859	1.12812	0.000618626	0.0175083
SYT9	381.699	2.73157	1.32322	0.000618909	0.0175083
PDE1C	4278.65	-0.968348	0.384568	0.000620323	0.0175277
TMPRSS15	340.603	-0.955522	0.378144	0.000621712	0.0175465
FXYD7	74.187	1.17548	0.491494	0.000624269	0.0175981
LOC105371873	16.082	1.84936	0.798526	0.000645828	0.0181847
ARHGEF5	184.825	1.28278	0.548486	0.000650383	0.0182916
SORBS2	1227.5	1.4439	0.631377	0.000652925	0.0183418
PLK1	4431.15	-0.636263	0.236766	0.000656181	0.0184119
KIF23	3762.36	-0.584405	0.211332	0.000661256	0.0185328
JPT2	6263.8	-0.469447	0.163933	0.000664098	0.0185909
GPC2	1188.21	-0.700275	0.266044	0.000665764	0.018616
PLXNB1	1051.39	0.866755	0.347778	0.000666733	0.0186216
ST6GALNAC3	4880.99	0.876618	0.353403	0.000675554	0.0188462
NKX6-2	94.1323	-1.08782	0.444324	0.000685789	0.0191096
CENPM	870.301	-0.586096	0.215058	0.00068865	0.01916
DEPDC1B	1572.44	-0.607953	0.223369	0.000689692	0.01916
ACER2	468.133	0.53747	0.19494	0.000689972	0.01916
PCDHGB5	71.508	1.20632	0.515229	0.00069357	0.0192378
HOGA1	129.365	0.840412	0.337065	0.000697084	0.0193087
FLRT2	10925.6	0.969291	0.386921	0.000697722	0.0193087
LIFR-AS1	176.313	0.712861	0.27598	0.000701613	0.0193942
LOC105376541	21.0331	-1.36971	0.577283	0.000712263	0.0196477
HCN2	21.3125	1.81646	0.819435	0.000712409	0.0196477
AKR1C2	504.711	-0.741531	0.287393	0.000720167	0.019839
TBX20	12.4039	3.14502	1.4212	0.00072203	0.0198564
AGTR1	856.841	1.0616	0.449	0.000722439	0.0198564
LOC105372096	9.68699	-0.141631	0.30011	0.000727261	0.0199662
CRACD	1110.98	-0.537442	0.195069	0.000728085	0.0199662
ADAM20P1	47.0217	-1.4164	0.605463	0.000732814	0.0200731
SYNGR2	3556.4	0.591892	0.221476	0.000735968	0.0201367
ZNF467	780.041	0.568486	0.21073	0.000738407	0.0201806
DAB1	421.942	1.47313	0.662775	0.000741239	0.0202352
TAC3	40.2041	2.13752	1.0084	0.000742984	0.0202504
INAVA	353.702	-0.680526	0.261017	0.000743473	0.0202504
TMX4	7234.94	0.739321	0.290203	0.000745893	0.0202935
MRGPRF	521.177	1.22303	0.534629	0.000750825	0.0204047
STRBP	3233.42	0.49596	0.180096	0.000754355	0.0204777
CYGB	171.242	0.913379	0.379383	0.000760939	0.0206332
GOLIM4	2252.39	0.580076	0.216971	0.000762851	0.0206619
COL3A1	565438	0.977999	0.394332	0.000767489	0.0207643
PTCHD4	1356.21	2.55804	1.29407	0.00076863	0.0207719
CYBRD1	16340.3	0.728848	0.281542	0.000774065	0.0208948
NR2F1-AS1	1100.06	0.868747	0.357583	0.000775269	0.0208948
LCP2	5.87599	0.0719145	0.247453	0.000775769	0.0208948
EGF	409.217	0.805772	0.326964	0.000782889	0.0210631
MELK	2503.61	-0.599723	0.224887	0.000785118	0.0210996
RAB27A	1340.69	0.782744	0.31998	0.000793419	0.021299
LINC02268	112.081	1.9596	0.945538	0.000799214	0.0214308
MPEG1	11.9362	1.99532	0.89816	0.000804547	0.0215339
GSG1L	323.135	-1.29145	0.555709	0.000804839	0.0215339
CENPA	1385.15	-0.467921	0.166615	0.000807686	0.0215862
MTBP	1021.09	-0.619391	0.235272	0.000809747	0.0215936
PITPNC1	739.453	1.19426	0.527642	0.000809747	0.0215936
LRRC55	125.792	1.97611	0.95399	0.000817216	0.0217687
LOC105377327	31.4182	-1.25581	0.541809	0.000821017	0.0218459
CIT	1576.87	-0.577595	0.216375	0.000824089	0.0219036
LOC107986297	3.65808	0.102351	0.264855	0.000832838	0.0221118
CDC6	3115.51	-0.623576	0.23806	0.000835894	0.0221686
SHISA7	44.9446	2.25561	1.12612	0.000840409	0.0222317
PPFIA2	185.007	1.52293	0.708531	0.000840611	0.0222317
C4BPB	11.2056	2.73709	1.23095	0.000841031	0.0222317
LOC105377989	60.8212	1.905	0.928734	0.00084573	0.0223315
PKP2	2661.28	1.99994	0.976176	0.000853234	0.0225051
FAM43A	826.623	-0.545522	0.202645	0.000855278	0.0225344
SOSTDC1	5182.97	1.95014	0.955088	0.000859089	0.0226102
PAWR	2110.26	0.829839	0.338237	0.000861944	0.0226607
LINC00379	15.062	-0.127643	0.285986	0.000864729	0.0227092
ROBO2	3520.22	0.727977	0.290157	0.00087723	0.0230125
MAP3K1	3802.56	0.775226	0.314797	0.000882426	0.0231238
TOR4A	175.275	1.16771	0.521542	0.000884586	0.0231553
PDGFRL	2056.22	1.39576	0.647111	0.000888792	0.0232287
SH3D19	2400.92	0.976014	0.421419	0.000890215	0.0232287
CLSTN2	810.465	0.961796	0.409569	0.000890273	0.0232287
SLAMF8	9.14257	3.14711	1.38314	0.000892698	0.0232669
PCK1	34.8708	1.83027	0.87425	0.000897214	0.0233349
C1QC	80.2058	3.71191	2.2882	0.000897235	0.0233349
EPB41	3285.83	0.655217	0.262343	0.000903583	0.0234632
LOC105377548	53.916	1.99342	0.976728	0.00090411	0.0234632
LOC107986606	50.2202	1.51368	0.706148	0.000907085	0.0235152
LOC105374145	7.52927	3.51135	1.56214	0.000913077	0.0236452
PDK3	1640.51	-0.498536	0.183044	0.000915185	0.0236744
SMO	1826.4	0.471107	0.171716	0.000919719	0.0237663
SORCS2	849.363	0.693243	0.279218	0.000935926	0.0241464
CLEC11A	3181.42	0.84491	0.357132	0.000936426	0.0241464
COBLL1	1370.1	1.79253	0.885534	0.00094386	0.0242893
PLA2G12A	4767.79	0.493351	0.182467	0.000943978	0.0242893
SLC6A15	678.11	0.818488	0.341189	0.00094524	0.024296
LOC105375977	14.1702	2.44766	1.18238	0.000950337	0.0243741
PAX3	958.504	-0.998574	0.427124	0.000950579	0.0243741
ERFE	265.294	-0.716124	0.287263	0.000951303	0.0243741
NLRC5	187.357	1.16081	0.528291	0.000956212	0.024474
PTGFR	4979.62	0.917905	0.39055	0.000968836	0.0247709
VPS13A	1232.83	0.473569	0.174008	0.000971852	0.024801
EPHA5	471.736	1.41529	0.672624	0.000972064	0.024801
LOC105377171	22.6925	2.47769	1.2427	0.000980245	0.0249575
PIF1	460.949	-0.569146	0.21755	0.000980263	0.0249575
PLEK	28.2522	2.26514	1.14271	0.000983022	0.0249885
VSNL1	416.829	1.12571	0.511852	0.000983545	0.0249885
LOC107984294	66.9634	2.27799	1.19502	0.000988624	0.025089
OSBPL10	1515.74	0.604084	0.236967	0.000989576	0.025089
HOXA11	461.684	1.54585	0.745088	0.000990727	0.0250918
AMHR2	299.72	1.38639	0.659442	0.000997189	0.0252291
ZNF33B	885.637	0.604203	0.238027	0.00101816	0.0257328
NXNL2	136.13	0.857224	0.368633	0.00102233	0.0258111
LOC105372708	37.9336	1.12124	0.508653	0.0010251	0.025854
EFHD1	1225.88	-0.619598	0.243246	0.00102794	0.0258987
NPHP4	678.767	0.951171	0.420056	0.00103848	0.0261371
NSF	324.342	-0.83357	0.350302	0.00104169	0.0261906
AMER3	6.43468	3.43381	1.48767	0.00104578	0.0262662
MGME1	2256.06	-0.518673	0.195722	0.00105164	0.0263859
PCDHGA8	916.736	0.402025	0.143381	0.00105445	0.0264289
LINC02700	8.31703	0.0527463	0.239701	0.00107289	0.0268486
TUBB4B	4553.98	-0.425408	0.153474	0.00107341	0.0268486
GPC3	26287.4	-0.617913	0.243088	0.00108415	0.0270865
LOC100130331	9.61975	3.22125	1.58631	0.00108516	0.0270865
TARID	165.58	1.31078	0.627482	0.00108784	0.0271254
LOC107105282	21.536	2.58434	1.39223	0.00109301	0.0272262
CXADR	5653.21	0.985147	0.43831	0.00109649	0.0272849
STXBP2	602.519	0.908771	0.402867	0.00109971	0.0273367
LOC107984531	19.1602	-2.11657	1.02213	0.00110912	0.0275425
ENOX1-AS2	117.716	0.89593	0.395369	0.0011136	0.0275989
REEP4	1268.77	-0.390498	0.138964	0.00111368	0.0275989
GADD45G	2693.88	-0.793686	0.336083	0.00111571	0.027621
LOC107984316	228.043	-0.880371	0.379996	0.0011236	0.0277879
PRC1	5761.66	-0.597929	0.242772	0.00113233	0.027975
GALNT16	381.796	-1.03715	0.461872	0.00113588	0.0280284
VSIG10L	454.263	0.674833	0.278511	0.00113703	0.0280284
GIMAP4	6.82141	0.0588903	0.241896	0.00113796	0.0280284
APBA1	130.691	1.31795	0.636421	0.00114492	0.028171
NPAS2	816.254	0.963593	0.437125	0.00114628	0.0281758
C19orf57	387.598	-0.789965	0.335208	0.00116619	0.0286363
BDNF	450.012	0.94062	0.426119	0.00117262	0.028765
LRFN1	280.629	0.900187	0.404012	0.0011811	0.0289436
KCNAB2	462.093	0.914212	0.412111	0.00118492	0.0290077
PRSS16	150.428	1.17283	0.560892	0.00119573	0.0292225
LOC102723560	3.90364	0.0870788	0.255143	0.00119611	0.0292225
JPT1	4207.95	-0.539015	0.208922	0.00120443	0.0293961
EFHC2	245.378	1.22083	0.59379	0.00120966	0.0294939
DNAJA3	209.738	1.45909	0.73389	0.00121388	0.0295671
LOC107986487	15.2462	1.96655	1.00078	0.00121792	0.0296356
CD14	29.687	2.08163	1.11571	0.00122418	0.029758
LOC107987107	177.52	-1.07018	0.487581	0.00122704	0.0297883
MET	4010.34	-0.647057	0.262529	0.00122789	0.0297883
NPPC	166.412	-1.42528	0.679338	0.00124149	0.030088
VRK1	3883.84	-0.55993	0.216681	0.00124633	0.0301751
GJC1	3020.39	-0.416938	0.152515	0.00125185	0.0302786
VEGFB	2131.37	-0.360549	0.127486	0.00125726	0.030379
PCCA-DT	326.748	-0.731632	0.308861	0.00126139	0.0304326
SCN1B	136.792	1.31468	0.6542	0.00126319	0.0304326
BEND4	116.846	1.84446	1.00321	0.00126366	0.0304326
F7	122.469	0.880893	0.397546	0.00126451	0.0304326
ADA2	2132.55	-0.759723	0.324124	0.00126896	0.0305092
PNPLA3	862.149	-0.443423	0.165436	0.00129141	0.0310182
ZSWIM6	1922.5	-0.536685	0.210605	0.00130166	0.0312074
KLK5	79.0106	1.52202	0.79351	0.00130187	0.0312074
WDR62	590.456	-0.500656	0.193244	0.00131473	0.0314846
RSPO3	4715.03	0.900988	0.412842	0.00131728	0.0315145
XIRP2	2257.68	0.623975	0.261258	0.00132215	0.0315995
GBGT1	113.368	1.04349	0.496106	0.00133229	0.0318105
DSN1	3064.26	-0.425432	0.157749	0.00133478	0.0318117
ID4	24715.8	0.769283	0.326757	0.00133497	0.0318117
PRDM11	1035.14	0.798955	0.356226	0.00134228	0.0319544
SACS	6587.58	-0.492152	0.190222	0.00134781	0.0320546
CGN	652.303	0.610729	0.252785	0.00136022	0.0323178
ELFN2	128.981	0.91201	0.421769	0.00136401	0.0323763
IGFBP2	23748.5	-0.51366	0.197442	0.00137002	0.0324869
MAD2L2	4752.88	-0.462846	0.176044	0.00137428	0.032556
TBX1	2008.64	-0.922119	0.41698	0.00137937	0.0326447
CCND2-AS1	312.225	0.591783	0.243151	0.00138491	0.0327437
GMFG	31.0892	1.53954	0.79388	0.00138873	0.0327866
CDC20	4901.38	-0.621234	0.256085	0.00138944	0.0327866
HPN	67.2801	1.35759	0.695851	0.00139795	0.0329554
PROS1	4466.65	1.04778	0.507995	0.00141201	0.0332543
RNASE4	1079.95	0.745187	0.331452	0.0014162	0.0333015
ERAP1	1648.66	0.64026	0.270692	0.00141676	0.0333015
CENPE	3511.57	-0.673513	0.284215	0.00141857	0.0333115
HPGDS	28.9562	2.16217	1.2323	0.00143232	0.0336019
LINC00693	874.756	-0.917003	0.418867	0.00144847	0.0339479
E2F7	1906.91	-0.57892	0.237209	0.00145255	0.0340104
CELF6	59.774	1.00096	0.48189	0.00145705	0.0340827
CHAF1A	1901.6	-0.559402	0.225794	0.00146091	0.0341401
EFEMP1	8109.47	0.968106	0.46469	0.0014685	0.0342843
PIK3R1	5720.37	0.688283	0.294364	0.0014739	0.0343671
TSGA10	340.812	0.54597	0.221139	0.00147489	0.0343671
LOC644135	6.15375	0.0587985	0.241827	0.00147962	0.0344275
EPDR1	2370.09	-0.585988	0.240407	0.00148032	0.0344275
PLCH1	499.315	0.914059	0.433713	0.00148662	0.0345276
LOC107984292	37.3944	1.72618	0.945538	0.00148748	0.0345276
ORC6	2687.97	-0.505079	0.199188	0.00149625	0.0346979
FBLN7	298.485	-0.63251	0.265728	0.00150658	0.0349039
ASTN1	214.992	0.893137	0.422036	0.00150891	0.0349239
SGO2	3137.19	-0.435221	0.164756	0.00151033	0.0349239
RPS6KC1	3504.97	0.418488	0.15791	0.00151513	0.0350014
ASIC1	1224.8	0.577486	0.239448	0.00152041	0.0350898
LOC105369667	30.7876	1.85867	1.04534	0.00152237	0.0351017
SLC51A	55.4945	1.07923	0.532792	0.001535	0.035359
TUBB4A	394.294	0.934105	0.448769	0.00153697	0.0353707
ABCG4	127.275	1.25864	0.658864	0.00154264	0.0354338
IGDCC3	1507.45	-0.654377	0.278433	0.00154408	0.0354338
SAMSN1	29.019	2.74706	1.9313	0.00154629	0.0354338
LRTOMT	380.898	0.487537	0.192509	0.00154679	0.0354338
MAP4K4	14780.3	-0.422986	0.160313	0.00154703	0.0354338
TMEM158	1564.44	1.1632	0.595464	0.00155235	0.0355218
FABP4	255.011	1.13539	0.578698	0.00156006	0.0356645
GRIN3B	88.4077	0.82447	0.381148	0.00156275	0.0356925
LOC105372064	43.7376	0.953275	0.458775	0.00158484	0.0361627
LOC105372097	109.483	-1.02918	0.493521	0.00158788	0.036198
LRRTM4	1575.52	0.974474	0.477689	0.00159447	0.0363139
DSG1-AS1	11.5366	2.40245	1.37322	0.00160282	0.0364698
IRF7	97.5884	1.08412	0.546622	0.00160555	0.0364767
ITGA11	4602.38	1.10205	0.559522	0.00160614	0.0364767
TBX2	588.967	0.712246	0.318847	0.00162002	0.0367574
BMPR1B	1764.61	-0.705246	0.309428	0.00163416	0.0369816
FAM241B	153.982	-0.746408	0.333109	0.00163733	0.0369816
LOC105371078	82.1697	1.6815	0.985646	0.00163854	0.0369816
LOC107986472	17.0804	2.31806	1.36946	0.00164173	0.0369816
LOC107984120	12.6909	0.0700178	0.246488	0.00164263	0.0369816
SSTR1	190.445	0.925886	0.451323	0.00164292	0.0369816
RNASET2	1851.67	0.503946	0.202117	0.00164429	0.0369816
COL6A5	58.3708	1.86623	1.11687	0.00164445	0.0369816
PSD3	3707.96	-0.429419	0.16464	0.00164676	0.0369816
SYDE2	1716.82	-0.545568	0.220227	0.001647	0.0369816
LOC728392	7300.27	0.669851	0.292243	0.00164733	0.0369816
ASPM	4771.14	-0.622214	0.263916	0.00164825	0.0369816
ITCH	2509.32	-0.319041	0.113982	0.00165185	0.0370281
IGSF21	242.7	-1.30007	0.657053	0.00165368	0.0370347
VKORC1	6337.19	-0.399562	0.150878	0.00166026	0.0371477
MIR124-2HG	5.37583	0.0947148	0.259721	0.00166229	0.0371588
SLCO2B1	72.2248	2.11948	1.34748	0.00167103	0.037302
LOC105374785	14.9913	2.00688	1.11327	0.00167178	0.037302
LOC105373456	61.6894	1.30785	0.699802	0.00167661	0.0373752
LOC105371068	46.7256	1.63179	0.931956	0.00167904	0.0373949
FNDC11	49.1072	-0.800906	0.365955	0.00169192	0.0376471
TAGLN2	5420.05	-0.468009	0.182529	0.00171289	0.0380786
MAN2A1	9047.7	-0.398645	0.150303	0.0017155	0.0380936
SLC35F4	79.882	1.57081	0.902375	0.00171727	0.0380936
DRC7	24.4687	1.89467	1.11891	0.00171881	0.0380936
NCAPG	4404.56	-0.559685	0.23295	0.00171986	0.0380936
PRKXP1	268.43	0.726448	0.331385	0.00172287	0.0381253
EEF1A2	670.948	0.766122	0.353229	0.0017255	0.0381486
TSC22D3	7440	-0.67608	0.296761	0.00173175	0.0382069
DSG2-AS1	16.0949	2.24214	1.36505	0.00173186	0.0382069
PDLIM3	10434.9	-0.523697	0.209783	0.00173287	0.0382069
MXD3	521.442	-0.591946	0.250049	0.00173729	0.0382694
STC1	5855.07	-0.834524	0.384016	0.00173942	0.0382804
FAM81B	85.2239	1.27646	0.693198	0.00174095	0.0382804
SLC25A33	1408.22	-0.601884	0.255613	0.00174258	0.0382814
C16orf95	177.322	-0.692122	0.306539	0.00174823	0.0383707
LOC105374838	59.9464	-0.942355	0.452988	0.00175585	0.038503
SMS	6643.19	-0.568632	0.238198	0.00176749	0.0387232
OVOS2	228.837	-0.766088	0.349761	0.00177312	0.0387983
CHEK2	1725.13	-0.476215	0.190769	0.00177413	0.0387983
KIAA1211L	101.881	1.17359	0.625443	0.00178418	0.0389828
F13A1	990.733	2.44274	1.86404	0.0017875	0.0390201
LOC107984871	18.5884	-1.37786	0.717923	0.00179075	0.0390558
PCGF2	46.8483	2.11629	1.39852	0.00180194	0.0392645
EPHB1	270.901	0.869026	0.42438	0.00181183	0.0394445
SYNGAP1	84.3124	0.875354	0.427015	0.001819	0.0395649
LOC100419170	4.31083	0.0711542	0.2469	0.00182567	0.0396742
TCERG1L	99.4812	0.641132	0.283427	0.00183095	0.0397533
TMEFF1	246.056	-0.786458	0.365503	0.0018604	0.0403565
MAB21L2	722.88	1.23808	0.684396	0.00186294	0.0403754
LRTM1	271.268	0.914225	0.457585	0.00187363	0.0405707
HSDL2	4484.83	0.490306	0.197855	0.00188165	0.0407079
ULBP3	1947.17	-0.503786	0.205979	0.00190888	0.041215
LINC02364	4.72175	0.102158	0.26448	0.00191053	0.041215
PLPP3	4393.82	0.709369	0.327915	0.00191146	0.041215
LOC112267965	71.4727	1.05966	0.560654	0.00191293	0.041215
NKAIN1	681.908	-0.687099	0.308808	0.00191361	0.041215
LRRC40	3327.94	-0.404718	0.155802	0.00191576	0.0412246
GFRA2	857.494	1.00977	0.527151	0.00192779	0.0414466
PRKAR2B	2732.84	0.66567	0.300687	0.00193231	0.0415068
NUSAP1	12414.3	-0.522137	0.216485	0.00193899	0.0415589
CNTNAP3P2	48.3827	1.3594	0.773143	0.00194044	0.0415589
UST	1456.28	0.434536	0.171604	0.0019412	0.0415589
SATL1	52.0395	1.19381	0.651825	0.0019416	0.0415589
LINC00649	286.351	0.606592	0.266668	0.00194785	0.0416445
TRDN	5253.38	0.54091	0.229033	0.00194904	0.0416445
LINGO2	589.33	1.18359	0.654465	0.00195314	0.0416952
MFN1	2064.49	-0.359306	0.134494	0.001969	0.0419966
COLGALT2	882.864	-0.720507	0.330443	0.00198325	0.0422632
SUSD3	45.245	1.20612	0.669937	0.00198547	0.0422733
FAM107A	686.715	-0.752015	0.349868	0.00198778	0.0422853
SHCBP1	1576.03	-0.461313	0.185165	0.00199634	0.0424045
GATA3	342.818	-0.731953	0.3381	0.00199689	0.0424045
DSG4	71.5838	0.988917	0.5167	0.00200529	0.0425455
LOC112268081	41.5214	-1.43002	0.779074	0.00201167	0.0426435
RTL1	69.7593	1.29518	0.745646	0.00201785	0.0427319
LINC01541	8.77444	0.0873022	0.255432	0.00201937	0.0427319
B3GNT9	1079.75	0.702052	0.334113	0.0020251	0.0428156
GNAL	1016.15	-0.59121	0.256751	0.00203396	0.0429653
EMILIN3	595.43	0.896559	0.452447	0.00204925	0.0432506
ZFP69B	1310.61	-0.448613	0.179335	0.0020535	0.0433026
ADAMTSL4	670.831	0.60525	0.269653	0.00207345	0.0436514
GJB2	361.9	1.40194	0.8459	0.00207386	0.0436514
GABRB1	141.016	1.54186	0.964807	0.00207546	0.0436514
C3orf67	1099.47	-0.737419	0.346474	0.00208556	0.0438258
ACTL6B	9.89064	2.06468	1.2334	0.00209111	0.0439043
LOC107985517	24.279	2.3239	1.68906	0.00210236	0.0441022
HTR1D	30.2369	1.56051	0.944911	0.00211877	0.0444078
LINC00940	4.00906	0.0717593	0.24713	0.00212646	0.0445305
DIO2	64.9745	-1.1646	0.616832	0.00213087	0.0445842
MFAP2	8538.67	0.692385	0.325394	0.00214599	0.0448617
CPPED1	943.941	-0.446083	0.179475	0.00215818	0.0450776
FAM131B	678.434	0.902115	0.469909	0.00217418	0.0453354
NCAPH	1776.15	-0.560583	0.242649	0.00217427	0.0453354
CXCR2	4.77789	0.0628219	0.243317	0.00218008	0.0454174
TNC	36351.6	-0.554661	0.241236	0.00219728	0.0457364
MYOZ1	622.421	0.670544	0.313988	0.00220692	0.0458975
RAD54B	1157.79	-0.50693	0.212877	0.00221364	0.0459634
TBC1D2B	3783.17	0.538651	0.229616	0.00221429	0.0459634
EDN3	10028.1	-0.589729	0.259955	0.00221579	0.0459634
SV2C	29.1923	-1.67839	0.976157	0.00223217	0.0462635
IL27	7.62087	2.4737	1.49752	0.00224654	0.0465215
HOXC10	474.495	0.966785	0.521772	0.0022487	0.0465263
ZC3H12B	799.279	1.02185	0.56392	0.00225127	0.0465397
AURKA	3666.78	-0.5481	0.238026	0.00226033	0.0466556
SERPINB10	4.85493	0.0614331	0.242765	0.00226073	0.0466556
TCP11L2	373.858	1.08214	0.611558	0.0022669	0.0466831
IGFBP4	7302.27	0.854646	0.434937	0.00226812	0.0466831
DBP	747.815	0.757617	0.366805	0.00227142	0.0466831
CSTF2	2290.61	-0.349893	0.13283	0.00227225	0.0466831
RAPGEF3	282.243	0.80962	0.409481	0.00227351	0.0466831
LINC02550	7.9105	2.66493	1.56297	0.00227365	0.0466831
LINC02823	130.858	-1.05322	0.557744	0.00227727	0.0467178
LGI2	1146.47	0.603382	0.273656	0.00228308	0.0467563
RCHY1	6643.8	0.464197	0.191959	0.00228322	0.0467563
KAZN	2988.09	-0.42558	0.170301	0.00228494	0.0467563
FREM1	2293.95	0.541901	0.237091	0.00229744	0.0469723
PRDM16	434.096	-0.724212	0.344269	0.00231385	0.0472679
ZDHHC11B	443.804	0.922039	0.49398	0.00232562	0.0474682
SNAI1	800.139	-0.630883	0.287641	0.002348	0.0477891
DSG3	128.183	2.31781	3.97911	0.00234817	0.0477891
MADD	2925.36	0.326128	0.122014	0.00234874	0.0477891
COL27A1	2375.6	0.563156	0.251274	0.00234925	0.0477891
KRTCAP3	114.38	0.766189	0.381197	0.00235513	0.0478685
LOC105371077	26.6636	1.24498	0.743253	0.00237136	0.0481579
CKAP2	9223.53	-0.505386	0.210823	0.00239102	0.048448
ZBTB20	1612.81	0.41551	0.167132	0.00239143	0.048448
CCL3	7.13064	0.0472255	0.237873	0.00239165	0.048448
MYBPHL	52.9038	1.48728	0.971897	0.00239712	0.0485181
PAGE4	3.45621	0.07727	0.249685	0.00240742	NA
POC1A	768.18	-0.597783	0.269701	0.00241556	0.0488367
PPP1R14C	1032.1	-0.785949	0.390184	0.0024169	0.0488367
LOC105378029	43.2457	1.86287	1.41027	0.00242116	0.048882
GUCY2D	20.7694	1.89779	1.37628	0.00242384	0.0488953
MPPED2	2589.64	-0.799488	0.394278	0.00242848	0.0489241
SPAG5	7287.37	-0.60705	0.275123	0.00242932	0.0489241
PSME4	2469.32	-0.395178	0.15627	0.00243526	0.0489881
RALGAPA1	2334.11	0.429024	0.174815	0.00243654	0.0489881
EDARADD	185.105	1.10496	0.645868	0.00244334	0.0490839
TYMS	1068.41	-0.472962	0.198767	0.00244684	0.049084
RCN2	14392.9	-0.298441	0.110543	0.0024474	0.049084
LAMA5	3293.47	0.608601	0.286223	0.00245269	0.0491493
COL25A1-DT	27.6615	-0.328108	0.935815	0.0024603	0.0492458
SPC25	292.193	-0.815125	0.408224	0.00246158	0.0492458
LOC105376004	19.9643	1.59312	1.02358	0.00246433	0.04926
RARRES2	2332.21	0.506621	0.218821	0.00246691	0.049271
APBB2	2407.17	0.558705	0.250247	0.0024696	0.0492841
LOC107986566	6.03654	2.86503	1.77577	0.00247823	0.0494155
LOC105378954	73.1957	-0.749447	0.366737	0.00248844	0.0495782
CDCA8	3389.91	-0.610001	0.278877	0.00249172	0.0496028
LCLAT1	2365.98	0.568537	0.257123	0.00250172	0.0497608
FYB2	315.918	1.4064	0.938413	0.00250932	0.0498439
SYTL2	2399.88	-0.447412	0.184628	0.00251002	0.0498439
IL1B	12.1284	2.1612	1.47885	0.00252832	0.0501661
PDZD3	42.2549	1.56719	1.06011	0.00253668	0.0502907
NR1D2	2886.51	0.653801	0.31165	0.00254121	0.0503393
RMI2	2552.5	-0.563889	0.251215	0.00257366	0.0509274
UBE2S	7075.84	-0.507132	0.212799	0.00257511	0.0509274
TACC3	1852.11	-0.557882	0.249686	0.00258429	0.0510535
L3MBTL4	476.568	0.657694	0.317296	0.00258571	0.0510535
LOC105374959	6.12342	2.08611	1.19497	0.00259421	0.0511795
LRATD1	2868.56	0.515365	0.22635	0.00260278	0.0512821
FCGRT	5493.27	0.551928	0.249516	0.00260365	0.0512821
TSPAN7	4186.35	-0.566841	0.258535	0.00263364	0.0518027
KNL1	2300.86	-0.551106	0.246681	0.00263465	0.0518027
IL22RA1	12.3854	2.6515	2.14373	0.0026365	0.0518027
PICART1	6.35534	2.97115	1.87044	0.00264779	0.0518864
MIR218-2	6.50145	2.96503	1.88303	0.00264895	0.0518864
LOC107985474	6.53501	2.52627	1.59164	0.00264927	0.0518864
ROR1	4846.24	0.755278	0.386494	0.00264935	0.0518864
LOC107984578	216.578	1.90002	1.78305	0.0026518	0.0518925
RBPMS2	495.003	0.548362	0.247439	0.00265599	0.0519325
EDA2R	1187.58	-0.810887	0.414914	0.00266722	0.05211
SLC1A2	97.0448	1.39755	0.950608	0.00267815	0.0522607
KIF14	2610.91	-0.605116	0.2807	0.00267926	0.0522607
NEK5	403.595	0.76779	0.398407	0.0026825	0.0522816
PRKAG2-AS1	92.6255	-0.682571	0.329897	0.00268466	0.0522816
RAB11FIP2	5339.03	0.515636	0.226453	0.00268767	0.0522983
LRCH1	3173.14	-0.309104	0.116674	0.00270274	0.0525492
IFNLR1	108.299	1.07136	0.642236	0.00270536	0.0525578
TSHZ2	3083.57	0.668414	0.322076	0.00270878	0.0525822
FAM110C	208.11	1.10886	0.677106	0.00271289	0.0525892
TENT5A	2962.32	0.888383	0.490472	0.0027135	0.0525892
SPATS2L	14474.6	-0.489626	0.207551	0.00271979	0.052669
IKZF2	372.441	0.477739	0.205622	0.00273773	0.052974
TIAM1	1307.83	0.476042	0.205331	0.00276982	0.0535327
GJB6	10.8494	0.067854	0.245432	0.00277103	0.0535327
FAM181B	89.6481	0.923945	0.521728	0.00278644	0.0537874
TLCD3B	30.9957	-1.07993	0.616335	0.00279047	0.0538223
DLGAP5	7245.63	-0.597975	0.277796	0.00279899	0.0539436
LINC02801	4.7905	0.0581525	0.241486	0.00282854	0.0544696
GAS2L3	1597.74	-0.632817	0.301302	0.00283536	0.0545575
ZPLD1	47.9513	-0.137765	0.294349	0.00284073	0.0546174
LOC105376455	6.24142	-0.167991	0.328455	0.00284676	0.0546898
LOC105378672	74.1022	-0.779262	0.401845	0.00286753	0.0550452
D21S2088E	9.9984	0.0956704	0.260259	0.00287408	0.0551219
BUB1B	3080.36	-0.475685	0.202117	0.00287608	0.0551219
LOC107985795	8.83466	1.78448	1.21734	0.00287947	0.0551431
SYNE3	1253.55	-0.492251	0.214551	0.00288592	0.055223
CENPU	4720.86	-0.530025	0.237298	0.00290398	0.0554978
LOC90246	7.06151	-0.129117	0.285829	0.00290487	0.0554978
AIF1	3.27624	0.0758122	0.248902	0.00291434	NA
GRIA2	615.689	0.963181	0.569096	0.0029189	0.0557085
AOX1	365.18	1.84238	2.0584	0.00292051	0.0557085
GPRC5C	1751.63	0.61383	0.297766	0.00292477	0.0557458
CHRM2	885.17	1.45993	1.10566	0.00293035	0.0557992
LOC105377387	25.5302	-0.204008	0.385206	0.00293219	0.0557992
LOC105369690	68.3271	0.998309	0.599374	0.00297765	0.0566199
LRRC9	100.635	0.84923	0.475385	0.0030239	0.0574148
PLEKHA1	5933.28	0.562068	0.263224	0.00302421	0.0574148
RCCD1	2279.56	-0.504833	0.224068	0.00302763	0.0574348
PACC1	1010.53	-0.492988	0.217137	0.0030466	0.0577052
RERG	3676.08	1.05633	0.660028	0.00304666	0.0577052
PALMD	3854.57	-0.574046	0.267609	0.00305342	0.057788
NOC3L	3016.32	-0.402318	0.16633	0.00305747	0.0578195
PINX1	507.721	-0.456463	0.195188	0.00306645	0.0578932
MYCL	2241.7	-0.61091	0.292624	0.00307035	0.0578932
HMGCLL1	540.799	0.849498	0.48092	0.00307067	0.0578932
LOC105371912	56.1849	0.88828	0.511056	0.00307095	0.0578932
SFRP4	1180.9	-0.755126	0.393337	0.00308506	0.0581114
EXO1	1441.42	-0.668144	0.330873	0.00309165	0.0581114
LOC105374240	21.3589	1.41268	0.987413	0.00309403	0.0581114
GPR37	2932.17	0.594663	0.287008	0.00309447	0.0581114
LDLRAP1	1201.98	-0.33828	0.132569	0.00309453	0.0581114
ZNF217	1976.16	0.46592	0.202311	0.0031022	0.0582
DIAPH3	2283.92	-0.485727	0.213059	0.00310406	0.0582
CD53	9.65455	2.1579	1.58719	0.00311134	0.0582912
LOC107986675	19.5965	-1.29331	0.812058	0.00312186	0.0583145
INSYN2B	156.954	1.15153	0.777124	0.00312365	0.0583145
PRXL2A	6789.66	-0.313192	0.12074	0.00312649	0.0583145
GNRH1	66.5724	-1.19765	0.738656	0.00312757	0.0583145
NPSR1	4.85087	-0.0517692	0.239342	0.00312806	0.0583145
LOC105370518	133.233	1.25145	0.881427	0.00312925	0.0583145
OPLAH	867.682	0.565533	0.267522	0.00313084	0.0583145
LOC101927571	8.20105	2.11795	1.49017	0.00313187	0.0583145
LOC105375184	6.35925	0.0661001	0.244536	0.00313853	0.0583936
LCN12	40.6659	1.18032	0.79414	0.00315201	0.0585993
DBF4	2534.43	-0.627757	0.305347	0.00316384	0.0587741
DEPDC1	3814.52	-0.489437	0.212501	0.00317511	0.0589381
LOC105369877	27.0027	1.8413	1.87427	0.00318881	0.0590979
CHAF1B	1572.22	-0.566226	0.259524	0.00318979	0.0590979
LOC105377363	118.983	-1.14842	0.703201	0.00319105	0.0590979
NEK2	2104.73	-0.603914	0.290464	0.00319965	0.0592119
TNIK	2975.88	-0.536346	0.246429	0.00320718	0.0593058
LINC00605	58.6349	1.41754	1.0957	0.00321057	0.0593224
LINC00345	27.5622	1.4596	1.10318	0.00321298	0.0593224
ANOS1	5248.93	0.997379	0.626766	0.00321926	0.0593931
H2AX	1364.22	-0.438425	0.187271	0.00322686	0.0594878
GPSM2	3552.38	-0.449827	0.192152	0.00323454	0.0595841
LINC02588	12.7492	2.15148	1.9779	0.00324654	0.0597052
CKM	19800.5	0.656056	0.32596	0.00324963	0.0597052
LOC102724765	35.4347	1.3714	1.02629	0.00325024	0.0597052
LOC101929234	21.7777	1.1363	0.737915	0.00325099	0.0597052
ARL4C	1356.5	-0.565692	0.265974	0.00326089	0.0598416
PDE4C	202.721	-0.954949	0.553404	0.0032863	0.0602621
NR3C2	1372.19	0.520569	0.24054	0.00329943	0.060457
LOC105369863	51.2636	1.16033	0.791214	0.00330384	0.0604921
TMIGD2	86.585	0.623034	0.310741	0.00331683	0.0606839
MIR16-2	41.9731	-0.922222	0.530831	0.0033387	0.0609277
PSRC1	1997.86	-0.497224	0.226223	0.00334	0.0609277
PYROXD1	695.696	-0.421296	0.17873	0.00334002	0.0609277
SAPCD2	632.711	-0.560868	0.264241	0.00334023	0.0609277
RAB11FIP5	1581.5	0.879195	0.524275	0.00334848	0.061005
REXO5	544.199	-0.526723	0.24244	0.00334951	0.061005
PDK4	939.257	0.653863	0.331495	0.00335332	0.0610284
BCL6	3431.05	0.426538	0.18485	0.00337159	0.0613148
LOC102723341	7.84302	-0.0480141	0.238094	0.00338982	0.0615999
ESCO2	1991.36	-0.443446	0.192567	0.00340765	0.0618373
SKA2	3495.88	-0.347995	0.140065	0.00340868	0.0618373
CHMP1B2P	83.458	1.24216	0.927499	0.00341055	0.0618373
HROB	555.891	-0.500479	0.227665	0.00345207	0.0625383
DRAXIN	761.691	-0.629087	0.312829	0.00345438	0.0625383
SLN	4681.75	0.597386	0.298885	0.00345706	0.06254
KLK12	3.0986	0.0747975	0.248349	0.00347158	NA
LRRFIP1	13746.9	-0.451973	0.193959	0.0034724	0.0627705
CCNG2	23444.5	-0.410497	0.172837	0.00347778	0.0628209
EFNB3	2092.22	0.802692	0.46304	0.00348203	0.0628506
LOC112267972	70.2352	1.18922	0.864292	0.00349193	0.0629823
PKMYT1	531.388	-0.47414	0.212468	0.00349499	0.0629905
PLAGL1	7773.92	0.53623	0.256595	0.00351376	0.063255
CEP152	3666.15	-0.582731	0.282008	0.00351489	0.063255
ACP5	54.7857	1.04832	0.699128	0.00354693	0.0637841
CDO1	2010.15	-0.612481	0.303203	0.00355918	0.0639326
HMGB3	7624.49	-0.452471	0.192771	0.00356048	0.0639326
NIPAL3	2544.4	0.571378	0.278061	0.00362523	0.0650471
TTYH2	2756.38	0.330699	0.132277	0.00363108	0.0651038
LSAMP	3236.01	0.812382	0.476592	0.00363515	0.0651283
FAM83E	11.116	1.67467	1.37782	0.00364871	0.065323
PRICKLE4	194.444	0.517979	0.243548	0.00365149	0.0653244
FAM83D	2190.02	-0.544692	0.258816	0.0036588	0.0654068
ZNF77	333.478	-0.51627	0.240228	0.00366611	0.0654891
HES4	2264.58	-0.576343	0.276942	0.00366943	0.0655
SLC38A5	659.624	-0.415259	0.178338	0.00367741	0.065594
EPB41L2	14442.5	-0.499745	0.229766	0.00368357	0.0656249
SMARCB1	144.615	-1.24644	0.84682	0.0036847	0.0656249
DIRAS1	415.587	0.745852	0.415739	0.00368936	0.0656249
ARHGEF26	44.6297	0.125877	0.28255	0.00368999	0.0656249
LOC107986221	4.73745	0.0801685	0.251038	0.00370109	0.0656573
LOC101927019	5.16883	0.0737562	0.247838	0.00370235	0.0656573
MPP2	863.558	0.472003	0.214482	0.00370585	0.0656573
NEURL1B	631.731	-0.54373	0.258838	0.00370661	0.0656573
HMGA2	3996.4	-0.482548	0.219115	0.00370776	0.0656573
TRPM4	1234.1	-0.363136	0.149562	0.0037081	0.0656573
SVOP	16.8615	1.81894	5.05804	0.00372032	0.0658255
DISP2	177.83	0.804721	0.478653	0.00373878	0.0661037
TDRD9	4.80377	-0.0623542	0.243054	0.00374566	0.066177
SLC5A11	18.532	1.49673	1.30683	0.0037614	0.0664065
AZI2	2253.16	-0.28891	0.112616	0.00376501	0.0664219
LOC105374652	7.27581	2.05255	1.63946	0.00377885	0.0666174
FCMR	32.9709	1.5215	1.59531	0.0037821	0.0666187
CFAP46	99.0794	0.623027	0.320683	0.00378443	0.0666187
RPH3AL	120.957	-0.550041	0.264872	0.0038001	0.0668459
DUSP10	549.028	-0.691125	0.368481	0.00384631	0.0676096
CDKN2A	46.9378	-0.198661	0.373928	0.00386448	0.0678796
TARS3	1998.47	-0.423823	0.184902	0.00387082	0.0679085
HSPA2	666.239	0.940886	0.628441	0.00387174	0.0679085
LRFN5	3513.19	0.417421	0.182623	0.00388379	0.0680705
LOC105374690	17.7641	0.11163	0.270932	0.00388704	0.068078
CBX7	289.405	0.703604	0.392224	0.0039127	0.0684779
PALM2AKAP2	9815.69	-0.327351	0.131959	0.00393373	0.0687018
OTOF	65.5082	0.737937	0.418096	0.00393459	0.0687018
CALCR	47.4195	-0.157178	0.314601	0.0039364	0.0687018
TTLL4	2360.51	-0.423726	0.18657	0.00393686	0.0687018
SIGLEC14	9.97921	0.06477	0.244034	0.00394327	0.0687642
SULT1A1	852.169	-0.463829	0.210116	0.00395929	0.0689937
EZH2	4563.64	-0.519045	0.246812	0.0039769	0.0692507
MAATS1	116.277	0.982715	0.682295	0.00399154	0.0694557
CCDC88A	8504.52	-0.394882	0.168031	0.00400683	0.0696715
AEBP1	9322.02	0.730756	0.409373	0.00402452	0.0699289
SPATA17	161.892	0.5744	0.29071	0.00404483	0.0701863
LOC105369308	24.7826	-1.06842	0.709797	0.00404514	0.0701863
MSR1	21.871	1.26508	1.02601	0.00405389	0.0702642
LOC107986600	19.4498	-1.38347	1.03649	0.00405543	0.0702642
ITGB1BP2	602.192	0.516383	0.248597	0.0040635	0.0703536
LINC01122	16.3627	1.34638	1.10255	0.00407138	0.0704396
LOC105378685	18.4585	1.48587	3.46154	0.0040877	0.0706426
TRIP13	2311.61	-0.430026	0.190407	0.00408896	0.0706426
RNF227	635.129	0.43442	0.194711	0.00409418	0.0706823
ENKUR	58.0297	0.863118	0.547978	0.00409994	0.0707168
ZNF652	18625.4	0.455259	0.207993	0.00410203	0.0707168
ATG4C	2260.35	-0.413331	0.180625	0.00411329	0.0708605
LMLN2	9.61576	-0.0799284	0.251089	0.00411899	0.070868
METTL7A	1730.67	0.582886	0.302826	0.00411959	0.070868
SYNJ2-IT1	35.1143	-1.13929	0.789746	0.00413544	0.0710423
INTS6	5491.91	0.380241	0.167434	0.0041356	0.0710423
ADAMTSL4-AS1	114.286	-0.902313	0.555379	0.00413853	0.0710423
LINC00598	77.2652	-1.06223	0.717202	0.00414629	0.0710495
TNFRSF18	70.6054	0.746529	0.439497	0.00414718	0.0710495
P4HTM	2053.43	0.485547	0.228678	0.00414776	0.0710495
ZNF775	661.72	-0.44814	0.202246	0.0041608	0.0712224
NTAN1	605.798	-0.591856	0.300884	0.00417638	0.0714258
CD300LG	27.8494	1.4034	1.95518	0.00417859	0.0714258
ZNF195	1977	-0.411789	0.180821	0.00418473	0.0714802
FAM107B	3209.17	0.500055	0.238556	0.00418848	0.0714938
ITGB8	6735.5	0.736791	0.43361	0.00419193	0.0715023
LDHC	21.9798	-0.194188	0.365505	0.00420819	0.0716667
LOC105371894	4.25857	0.0558509	0.240592	0.00420892	0.0716667
LOC105373032	7.61754	0.110667	0.27024	0.00421046	0.0716667
PAK4	949.025	0.721235	0.419393	0.00422	0.0717786
ABCC4	783.889	-0.597602	0.306787	0.00424749	0.0721954
ENKD1	252.386	0.50449	0.243027	0.00425905	0.072341
MROH2A	8.84888	-0.135948	0.291531	0.00426554	0.0723907
C8orf37	839.525	0.398792	0.174328	0.00427006	0.0723907
FGFR1OP	2216.12	-0.510129	0.244546	0.00427162	0.0723907
P2RY13	7.64822	1.96958	1.94546	0.00427395	0.0723907
FZD6	1508.25	0.757846	0.457809	0.00429335	0.0726685
TNNT1	8847.77	-0.495223	0.238301	0.00429977	0.0726899
NEK11	462.345	0.721865	0.423996	0.00430134	0.0726899
LOC101929750	6.15633	0.0615286	0.242667	0.00430363	0.0726899
CRISPLD2	2245.55	0.750958	0.452855	0.00431159	0.0727735
LBX1-AS1	158.062	-0.778129	0.45616	0.00431849	0.0728391
ADGRV1	503.78	0.733937	0.437114	0.00433384	0.073047
NSG2	63.5599	1.27857	1.50885	0.00438149	0.0737544
LOC105370181	23.4169	1.33006	1.36823	0.0043819	0.0737544
PFKP	3020.53	-0.458018	0.211153	0.0043962	0.0739436
P2RX5-TAX1BP3	58.6013	-1.00226	0.679706	0.00442076	0.074305
KCNJ6-AS1	13.8956	1.5226	3.2046	0.00442906	0.0743928
GRB14	286.832	-0.755652	0.441795	0.00445029	0.0746975
PARP15	73.7069	-1.06916	0.754734	0.00445861	0.0747852
ZNF503-AS2	194.464	0.884525	0.60957	0.00448376	0.075155
FOXJ1	159.967	0.774725	0.483535	0.00449123	0.0751676
MMP28	9.14341	0.108303	0.268307	0.00449221	0.0751676
BAZ1A	2707.56	-0.310673	0.125935	0.00449383	0.0751676
WNT5A	2994.63	0.593566	0.313342	0.00449809	0.0751868
FOXD4	210.332	0.612668	0.330328	0.00450943	0.0753242
C4A	55.4098	1.07153	0.882401	0.00451534	0.0753709
CPLX3	9.09889	1.49004	NA	0.00452608	0.0754866
CLIP4	2728.79	0.417305	0.186829	0.00452856	0.0754866
MEOX2	1039	0.939768	0.69406	0.00453163	0.0754866
SLC4A4	1887.01	0.398948	0.176767	0.00454606	0.0756749
LOC646652	590.294	-0.65144	0.355753	0.00455725	0.0758089
PRAP1	58.0054	0.694748	0.40536	0.00456159	0.0758136
DENND4C	5409.34	0.43323	0.195745	0.0045638	0.0758136
FOXG1	450.206	-0.925108	0.61188	0.00458399	0.0760968
CCDC149	899.336	0.733673	0.448483	0.00461767	0.0765681
RFC4	2605.15	-0.423923	0.189258	0.00461871	0.0765681
AK7	167.238	0.797071	0.514737	0.00462351	0.076595
LOC105374981	32.7704	0.119664	0.276966	0.00465065	0.076992
CFAP221	340.265	0.695464	0.411517	0.00465511	0.0770131
WFDC1	126.003	-0.917341	0.60811	0.00465972	0.0770367
FAM3C	7366.32	0.476304	0.220987	0.00466456	0.077064
KIAA1549L	168.132	-0.694322	0.396277	0.00471565	0.0778548
FANCB	874.587	-0.530574	0.266301	0.00471947	0.0778648
LOC105374368	53.8847	-1.16639	0.909637	0.00472516	0.0779056
FCGR1B	3.48597	0.0619002	0.242774	0.00473822	NA
NPDC1	800.461	0.705302	0.424274	0.00475125	0.0782824
DDX60L	469.203	-0.73384	0.431899	0.00475907	0.0783578
CEBPB	2652.21	0.674478	0.393083	0.00476678	0.0784314
EYA4	4770.29	-0.5021	0.245741	0.004798	0.0788913
TAS1R3	39.9781	1.02581	0.831837	0.004808	0.0789553
CCDC155	5.08626	2.23198	1.68889	0.00480842	0.0789553
PHKG1	79.4825	0.67501	0.395423	0.00482348	0.0790325
CHST2	914.057	0.64869	0.371635	0.00482392	0.0790325
NPY1R	455.964	1.02433	0.89486	0.00482425	0.0790325
AMD1	6956.43	0.364599	0.162431	0.00482619	0.0790325
GPR62	29.219	0.946799	0.691423	0.00483329	0.0790446
GCNT1	2573.56	0.681263	0.402014	0.00483487	0.0790446
THSD4	2656.34	0.668132	0.390077	0.00483673	0.0790446
FAM110A	2127.99	-0.700413	0.407244	0.0048414	0.0790504
ODF3B	43.0948	0.945612	0.719349	0.00484362	0.0790504
ATP2B2	47.2129	1.15692	1.36395	0.00486713	0.0793805
BICDL1	703.586	0.507368	0.253382	0.00488358	0.0795951
SYTL3	1693.98	-0.589576	0.312443	0.00489572	0.0797393
AMIGO2	1275.74	0.900437	0.672682	0.00493214	0.0802783
CACNB2	1776.23	0.540683	0.280888	0.00494583	0.0804052
ASB11	317.147	0.628717	0.359257	0.00494658	0.0804052
GGTA1P	372.906	0.902167	0.686292	0.00496351	0.0806262
TRPC1	2876.49	0.46071	0.220588	0.00497241	0.0806644
RUNDC3A	56.7487	1.15505	1.81206	0.00497253	0.0806644
AFF1-AS1	44.7677	0.989565	0.810157	0.00497997	0.080731
SHE	45.3067	1.07207	0.999732	0.00498866	0.0808177
UBE2Q2L	16.7219	-1.02648	0.759872	0.004994	0.08085
LSP1	489.029	0.507231	0.254893	0.0049985	0.0808688
LINC01915	83.7414	-1.11604	0.893167	0.0050468	0.0815956
CSF3R	111.093	1.10613	1.74184	0.00508859	0.0822162
CDKL2	238.367	0.857872	0.630534	0.00509782	0.0823104
LOC105377412	4.97153	-0.0447029	0.237136	0.00510468	0.0823662
NTS	152.981	0.672512	0.407622	0.00513858	0.0828541
OBSCN-AS1	115.577	0.644028	0.375187	0.00514177	0.0828541
RRAD	158.002	0.110772	0.27003	0.00515631	0.0829943
RBMX2	1141.88	-0.368454	0.161054	0.00515733	0.0829943
ADAMTS19-AS1	12.8449	1.1174	0.973446	0.00516532	0.0830676
LOC107985435	4.6187	0.0496063	0.23851	0.00517144	0.0831106
DIPK1B	2849.14	-0.453049	0.214916	0.00518771	0.0833168
NIPAL1	411.049	0.747584	0.491985	0.00521741	0.0837382
ZMYM1	2408.42	-0.467473	0.223907	0.0052368	0.0839912
USP32P2	36.3393	-0.171663	0.331434	0.00524012	0.0839912
KCTD2	2240.48	0.65773	0.393518	0.00526865	0.0843926
ZDHHC19	11.9269	1.14453	1.09725	0.00527388	0.0844205
CD33	7.91189	0.0667382	0.244829	0.00527912	0.0844484
KCND1	268.137	0.572484	0.312354	0.00528457	0.0844798
SLC29A4	1831.61	-0.476525	0.232791	0.00529182	0.084519
ACOT7	1310.31	-0.325539	0.13729	0.00529401	0.084519
SOCS5	2438.78	0.417751	0.192291	0.00530682	0.0845677
VSIG2	10.2585	1.17658	1.13695	0.00530996	0.0845677
LOC105372439	35.8819	-0.860996	0.592431	0.00531065	0.0845677
LOC112268096	4.79642	0.0480309	0.238029	0.00531424	0.0845677
GLP1R	11.7865	0.052257	0.239349	0.00531454	0.0845677
KNSTRN	2394.17	-0.425275	0.19848	0.00533836	0.0848909
SCD5	2380.29	-0.529675	0.2779	0.00535014	0.0850223
FAM163A	169.162	0.914354	0.7622	0.00535641	0.085066
RAB7B	450.126	0.779549	0.537921	0.00536866	0.0852046
SKA3	1946.42	-0.513755	0.260818	0.0053751	0.0852509
PARPBP	1652.15	-0.398354	0.180825	0.00538608	0.085369
SNAI2	9363.23	-0.340851	0.145499	0.00539395	0.0854378
PCDHB14	474.546	0.59959	0.340796	0.00541016	0.0856384
RFK	2875.12	-0.321795	0.135855	0.00541586	0.0856726
VPS37B	3748.73	-0.364679	0.157921	0.00544123	0.0860177
PCDH10	1696.67	0.833859	0.618366	0.0054527	0.0861426
ACPP	345.2	0.90179	0.756834	0.005459	0.086186
LINC01821	5.01794	-0.0718323	0.246982	0.00550338	0.0868299
HERPUD2	2907.59	0.350995	0.151476	0.00551043	0.0868845
GREM1	227.983	0.948749	0.880746	0.00551535	0.0869054
PPP4R4	9.13292	1.35116	3.66852	0.00553227	0.0871152
MICU2	5457.08	-0.38872	0.175481	0.00554269	0.0871835
KIF15	4645.01	-0.521938	0.268909	0.00554381	0.0871835
KISS1R	47.132	0.731746	0.479323	0.00554923	0.087212
CCDC148	146.559	-0.614325	0.347227	0.00557764	0.0875502
TMEM40	18.1435	-0.248757	0.474443	0.00557799	0.0875502
FCGR1A	7.4414	0.102055	0.263876	0.00558832	0.0876001
BRSK2	91.7409	0.648894	0.38979	0.00558841	0.0876001
C1QTNF7	1031.62	0.622756	0.366801	0.00560995	0.0878807
UNC5B	3272.32	0.564559	0.308119	0.00562041	0.0879876
PNPLA7	78.8791	0.725955	0.47973	0.00562655	0.0880267
GBP1	1767.49	-0.469465	0.230853	0.00564552	0.0882665
ATP1B1	2848.79	0.734169	0.492539	0.00565228	0.0883151
PIMREG	1751.23	-0.544697	0.288717	0.00565836	0.088353
TNK1	116.688	0.634903	0.379377	0.00567836	0.08856
SNIP1	459.886	-0.479337	0.238617	0.00567894	0.08856
LOC105375484	23.0344	1.05962	1.22992	0.00569627	0.088773
ARL4D	2390.65	0.282934	0.1164	0.00570577	0.0888637
LOC107986709	96.0806	-1.03234	0.875941	0.00571133	0.0888639
MEX3A	4486.05	-0.398953	0.182368	0.00571313	0.0888639
ST6GAL2	5498.96	-0.457828	0.223562	0.00573521	0.08915
HAGLR	337.212	-0.769893	0.510206	0.0057576	0.0893941
DNAJC9	764.613	-0.420281	0.197603	0.0057583	0.0893941
NEIL3	899.859	-0.512876	0.265437	0.00576995	0.0895175
CCSAP	2837.93	-0.447622	0.215676	0.00577888	0.0895422
CYP27A1	790.705	-0.621385	0.358563	0.00577894	0.0895422
ZNF503	1881.07	0.654753	0.406288	0.00578837	0.0896308
PLEKHN1	39.4357	0.182238	0.344712	0.00581361	0.0899641
CRABP2	1802.84	-0.516142	0.268224	0.00581953	0.089998
LOC112268125	4.39471	-0.0581346	0.241359	0.00583178	0.090045
DENND6B	243.782	0.663163	0.410131	0.00583496	0.090045
FLRT1	767.141	0.656807	0.410353	0.00583596	0.090045
RTN4RL1	252.468	0.664594	0.418564	0.00583745	0.090045
CPA1	154.053	0.741589	0.517465	0.00584127	0.0900464
RRAGD	3546.16	-0.451588	0.215971	0.00585045	0.0901001
LINC01551	139.092	-0.0792045	0.250605	0.00585438	0.0901001
MCOLN3	571.414	0.602708	0.351471	0.00585593	0.0901001
STING1	2689.25	0.59097	0.341082	0.00586038	0.0901112
POMGNT2	1826.17	0.383926	0.175367	0.00587205	0.0901895
TFEB	280.587	0.807929	0.621356	0.00587293	0.0901895
MCEE	1855.23	0.52403	0.285398	0.00589581	0.0904835
ZUP1	1510.64	-0.425974	0.202367	0.00590562	0.090564
CITED2	5698.49	0.579567	0.328969	0.00590855	0.090564
RIMS1	222.107	0.89374	0.819371	0.00592055	0.0906905
LOC102724397	149.973	-0.476291	0.239355	0.00595112	0.0911011
LOC105378129	3.63455	0.0556812	0.240459	0.00597199	0.0913628
OGN	13753.1	0.872149	0.637585	0.00598684	0.091532
REC8	1057.99	0.553074	0.313657	0.00602224	0.0920152
EPHA5-AS1	49.3323	0.955938	1.94196	0.00605864	0.0925128
ESF1	4881.64	-0.320226	0.137585	0.00609532	0.0930019
LOC102725112	12.0871	0.123513	0.279643	0.00609836	0.0930019
ARHGEF25	374.458	0.607738	0.365539	0.00610946	0.0931122
HIF1A	8370.02	-0.338493	0.147144	0.00611447	0.0931122
ALDH4A1	1322.63	-0.564986	0.313697	0.00611819	0.0931122
NRXN2	498.149	0.673356	0.439494	0.00612099	0.0931122
RRM2	5210.42	-0.490063	0.256054	0.00616001	0.0936469
LRATD2	1232.92	0.705936	0.482957	0.00616498	0.0936636
LRRC38	10.1566	0.0974124	0.260689	0.00617061	0.0936902
B3GNT2	2352.14	0.53491	0.294696	0.00618722	0.0938836
MYOD1	7194.97	-0.574086	0.326359	0.00619117	0.0938845
REM2	275.595	0.76985	0.58602	0.00621753	0.0942253
IFI44	741.234	-0.512735	0.271355	0.00622739	0.0943156
SH3GLB1	15211.4	0.308495	0.13183	0.00624021	0.0944505
SLITRK3	709.373	0.0944776	0.258919	0.0062462	0.094482
SLC22A8	11.6756	0.0481879	0.238066	0.00626101	0.0946469
CA14	998.755	-0.599824	0.351507	0.00627888	0.0948349
NYNRIN	4671.75	0.458968	0.234463	0.00628129	0.0948349
DNAJC22	836.041	0.093856	0.258541	0.00630558	0.0951423
NEUROD6	4.3134	0.0486989	0.238203	0.00632146	0.0953026
TNNI2	3631.09	0.367819	0.16789	0.00632409	0.0953026
LENEP	8.15486	0.152721	0.307562	0.00635325	0.0956825
MMEL1	8.61825	0.0427656	0.236473	0.00636036	0.0957299
LOC107985355	12.8761	-1.02439	0.949087	0.00636718	0.095773
CCAR1	8083.96	-0.328418	0.143742	0.00638837	0.096032
RPARP-AS1	364.005	0.542039	0.303832	0.00640053	0.0961412
MXRA7	3476.33	0.436552	0.214228	0.00640359	0.0961412
LINC02255	2.58696	0.0697008	0.245802	0.00640826	NA
SEPTIN5	64.2169	-0.544012	0.299709	0.00641765	0.0962926
PLCB2	249.164	0.616898	0.38137	0.006427	0.0963732
MYC	7213.79	-0.454819	0.228836	0.0064417	0.0965338
TBC1D14	1877.43	0.436547	0.216471	0.00645489	0.0965991
LOC105369583	6.23465	0.0384283	0.235424	0.00645637	0.0965991
ZNF280C	1728.65	-0.496285	0.260035	0.00645805	0.0965991
CSNK1G1	1599.45	-0.352187	0.157937	0.00646457	0.096634
LRMDA	159.967	0.515869	0.280549	0.00646884	0.096634
ATPSCKMT	687.432	-0.44992	0.224083	0.00647236	0.096634
BARHL1	3.48158	0.0856515	0.253508	0.00647533	NA
DONSON	1982.09	-0.317576	0.137738	0.00650494	0.097057
RIN1	349.733	0.642758	0.414501	0.00650872	0.097057
DTYMK	2285.05	-0.348565	0.156097	0.00654223	0.0974966
BACH2	1443.68	-0.482032	0.249237	0.00657302	0.097895
SPIRE2	128.065	0.603274	0.369098	0.00658188	0.0979667
CENPF	9432.13	-0.510312	0.273104	0.00659801	0.0981464
CENPK	4266.76	-0.466962	0.239968	0.00661123	0.0982257
KCNJ3	51.9646	0.181342	0.342564	0.00661146	0.0982257
SLC6A17	10.5882	0.140044	0.29429	0.00662097	0.0982764
SP110	642.38	0.545222	0.314582	0.0066266	0.0982764
LINC01504	92.1378	0.737568	0.548621	0.00662707	0.0982764
LOC107984740	59.967	0.202458	0.375024	0.00668236	0.0990357
LOC105378372	12.4264	-0.252729	0.479224	0.00668992	0.0990871
UBE2T	2678.22	-0.509863	0.271859	0.00669637	0.0991219
LOC105373780	49.7064	0.802855	0.695322	0.00670238	0.0991501
BTC	350.19	0.868427	1.19831	0.00673024	0.0994922
COL15A1	5281.05	0.633546	0.407807	0.00673512	0.0994922
STARD3NL	4713.66	-0.262713	0.108722	0.00674076	0.0994922
ERGIC1	6664.72	-0.371336	0.170731	0.00674196	0.0994922
ENPP4	1718.69	0.471076	0.246505	0.00676091	0.0997111
KIAA0319	21.9666	0.118275	0.275288	0.00678477	0.0999812
ADAM28	426.25	-0.519351	0.285527	0.00678749	0.0999812
SULF1	13497.6	0.802306	0.603546	0.00679868	0.100085
LIMA1	9807.45	-0.365161	0.167851	0.00680398	0.100102
LOC105374492	3.33716	0.0864301	0.253747	0.00681649	NA
LINC01231	4.93942	0.126892	0.282524	0.00685567	0.100801
TUBB2B	5541.37	-0.443846	0.219724	0.00687957	0.101091
FAM72B	275.338	-0.709047	0.485663	0.0068849	0.101108
LFNG	882.361	-0.538004	0.301355	0.00689821	0.101165
EGFEM1P	123.125	0.297941	0.616667	0.00689837	0.101165
ACBD4	352.629	0.471685	0.248041	0.00690282	0.101165
APOA1	113.09	-0.263721	0.509783	0.00690552	0.101165
GMNN	2472.84	-0.44189	0.221608	0.00691127	0.101188
SUGCT	330.401	-0.540125	0.3032	0.00691714	0.101193
CDC27	5961.09	-0.323945	0.14314	0.00692554	0.101193
LOC102725009	11.1243	0.140322	0.294224	0.00692695	0.101193
LOC110384692	15.5621	0.0840218	0.252801	0.00693182	0.101193
LOC107986437	14.0279	0.143857	0.297851	0.00693526	0.101193
RGS16	2060.65	-0.46665	0.241164	0.00693673	0.101193
LOC105378731	4.53763	0.045716	0.23732	0.00695319	0.101372
ZWINT	3397.95	-0.472852	0.246342	0.00696836	0.101526
LINC00920	21.1209	0.160877	0.316242	0.00697645	0.101526
KIAA1324L	2290.06	0.378416	0.179689	0.00697786	0.101526
HOXD10	210.73	0.807154	1.93023	0.0069813	0.101526
FAM120B	220.045	-0.851843	0.715863	0.00698469	0.101526
GLOD4	5838.72	-0.299357	0.129468	0.00699101	0.101557
LOC105372984	8.30207	-0.190764	0.355578	0.00699802	0.101597
GATA4	409.292	0.752889	0.624661	0.00702282	0.101896
LOC107986366	21.1575	0.819929	0.737928	0.00702728	0.1019
ARSJ	1326.38	-0.50241	0.268168	0.00703638	0.101971
AKIP1	3059.74	-0.291533	0.124685	0.00707855	0.10252
XKR9	178.104	-0.500328	0.270564	0.00708903	0.102611
NXPH1	30.8008	0.170331	0.327699	0.00711161	0.102812
ITGA4	8367.67	-0.625108	0.393736	0.00711351	0.102812
CDK20	1115.51	0.363038	0.168791	0.00711569	0.102812
MAP3K11	985.632	0.512597	0.287189	0.00713567	0.102998
LYVE1	43.5822	0.160111	0.315325	0.00713711	0.102998
MINDY1	592.277	0.406719	0.199237	0.00714191	0.103006
GSPT2	1066.49	0.294955	0.127366	0.00714714	0.10302
LOC102723406	28.0055	-0.732669	0.529322	0.00716312	0.103189
ANKEF1	166.361	0.558297	0.332925	0.00717233	0.10326
LOC101928692	38.9375	0.719124	0.548376	0.00726327	0.104507
SYNCRIP	13133.3	-0.371396	0.173634	0.00727518	0.104616
RADIL	178.894	0.730721	0.594601	0.00729427	0.104829
NCK2	5124.22	0.295421	0.12816	0.00730342	0.104841
PLK4	2040.72	-0.486998	0.262081	0.00730523	0.104841
CTSH	502.427	0.654274	0.459055	0.00731	0.104841
GAREM2	1738.71	0.381242	0.182188	0.00731244	0.104841
FGF10	2780.27	-0.726562	0.53162	0.00733448	0.105094
LOC107984832	8.46274	0.165	0.320748	0.00735156	0.105094
LOC105377991	14.8499	0.0929661	0.25777	0.0073576	0.105094
LOC102724015	41.2077	0.192869	0.358456	0.00735771	0.105094
DPPA4	723.159	-0.572112	0.339948	0.00735942	0.105094
LOC101927490	6.1614	0.117606	0.274567	0.00736124	0.105094
C2orf68	7967.58	0.353592	0.163954	0.00736354	0.105094
ST18	36.2972	0.137488	0.291628	0.0073649	0.105094
FBXW7-AS1	28.6152	0.800594	0.759292	0.00738694	0.105347
PIEZO2	4505.39	0.739962	0.608951	0.00739678	0.105425
LOC105378179	86.1112	0.654596	0.459683	0.00740355	0.105459
PCNA	2608.41	-0.320983	0.142584	0.00741829	0.105607
TVP23A	287.039	0.635351	0.434435	0.00742519	0.105643
LINC01844	17.4435	0.817765	2.19562	0.00744464	0.105815
CCBE1	798.085	0.733826	0.613389	0.00744603	0.105815
LINC01902	50.1546	0.804372	1.27747	0.00749083	0.106353
LOC105372859	47.4121	-0.635581	0.416504	0.00749271	0.106353
HES7	59.7139	-0.644482	0.427067	0.00749851	0.106373
LOC101927711	2.73637	0.0630766	0.243068	0.0075181	NA
SLC35G5	23.3079	-0.255629	0.483697	0.00754844	0.106903
ARHGAP25	84.138	0.749522	0.659788	0.00754929	0.106903
LIPF	4.04744	0.0478442	0.237921	0.00755472	0.106903
AEN	1857.76	-0.439707	0.227317	0.00756389	0.106903
IKZF4	1175.88	0.520003	0.305295	0.00756548	0.106903
C10orf90	233.416	-0.744831	0.573005	0.00757171	0.106903
TPST1	3522.84	-0.31158	0.13823	0.00757213	0.106903
LOC107986204	4.28763	0.0663424	0.244291	0.00757617	0.106903
PPIP5K1	223.917	-0.495376	0.271976	0.00758127	0.106903
CES3	172.924	-0.686785	0.478134	0.00758163	0.106903
RNF152	208.525	0.67933	0.514285	0.00758447	0.106903
FRZB	7316.69	0.758225	0.677537	0.00762423	0.107401
CBLB	5459.31	-0.428639	0.214713	0.00765156	0.107723
CREB5	4600.25	-0.47196	0.259617	0.00765674	0.107733
LOC105375183	86.081	0.780736	0.833865	0.00768041	0.108004
LOC105370194	3.80658	0.0495429	0.238424	0.00772096	0.108511
MACROD2	424.517	0.662974	0.493136	0.00773649	0.108619
PLEKHA5	3034.7	0.278068	0.11969	0.00773766	0.108619
DDHD1	2659.13	-0.285092	0.123395	0.00776036	0.108856
GALNT12	547.814	0.579355	0.369389	0.00776356	0.108856
KIF25	30.2705	-0.783855	0.663601	0.00777506	0.108954
INAFM2	3227.85	0.261165	0.110389	0.00778267	0.108998
LINC02544	104.65	-0.565487	0.342948	0.00780215	0.109208
TBCD	2223.71	-0.348185	0.162101	0.00784714	0.109774
PDGFA	871.589	-0.494125	0.273115	0.00787619	0.110116
LRRC26	3.74685	0.0497253	0.238476	0.00789033	0.11024
BCO2	126.242	0.65238	0.48222	0.00789415	0.11024
RORB-AS1	4.72274	0.098122	0.260856	0.00790964	0.11034
PTP4A1	12410.3	-0.268698	0.114791	0.00791045	0.11034
AMBN	4.53771	0.0628349	0.242965	0.00791835	0.110387
UTP15	1656.06	-0.372681	0.178393	0.00793269	0.110523
CCNA2	6035.71	-0.499621	0.274412	0.00794083	0.110573
FABP7	1667.71	0.744538	0.744602	0.00798331	0.111039
RFXANK	2226.78	-0.379785	0.183976	0.00798352	0.111039
FLRT3	7911.31	0.505629	0.289002	0.00798978	0.111063
PTGR1	3780.05	-0.308163	0.138476	0.00800149	0.111161
FOXP4-AS1	45.8938	-0.260873	0.496061	0.00804245	0.111666
MYBPC1	3047.99	0.613671	0.425332	0.00806363	0.111896
FANCL	826.492	-0.410967	0.206862	0.00808943	0.112159
ACVR1C	28.4418	0.23455	0.430991	0.00809185	0.112159
LINC01424	24.1652	-0.318232	0.695202	0.00810436	0.112226
ZNF367	1193.9	-0.53118	0.311726	0.00810596	0.112226
LOC105375265	61.4427	-0.863151	1.04935	0.0081286	0.112475
LINC01184	1168.01	-0.32189	0.146049	0.00814748	0.112649
KRAS	5504.74	-0.331916	0.153046	0.00815407	0.112649
LOC401040	7.15756	0.0330316	0.234205	0.00815516	0.112649
LINC01940	13.3018	-0.079249	0.250385	0.00816089	0.112664
ELAVL2	807.364	-0.723493	0.576759	0.00817503	0.112795
LOC101928530	32.0533	-0.78021	0.683774	0.00818646	0.112888
DCBLD1	765.449	-0.412267	0.208277	0.0082023	0.113042
DHX58	107.199	0.558673	0.351768	0.00821119	0.1131
TMEM59	17765.2	0.434817	0.230323	0.00827082	0.113794
LYNX1	332.739	0.732456	0.756979	0.00827605	0.113794
PTPRD-AS2	8.56653	0.0565735	0.240708	0.00828167	0.113794
LOC105371461	4.3242	0.0444396	0.236942	0.00828445	0.113794
LOC105373958	163.261	-0.747991	0.633261	0.0082851	0.113794
TAF4B	844.811	-0.525151	0.307105	0.00828998	0.113797
PYCR3	19.2319	-0.186305	0.348392	0.00831076	0.113927
ZMYND19	1437.05	-0.318581	0.145509	0.00831217	0.113927
TGFB3	4101.21	0.497246	0.283512	0.0083163	0.113927
SMC6	6075.32	-0.403427	0.197946	0.00831834	0.113927
STIL	1636.28	-0.518718	0.303219	0.00832304	0.113927
SPNS2	332.38	0.738624	0.82032	0.00833963	0.11409
HACD1	1321.01	0.503848	0.295107	0.00836539	0.114377
SIK1	94.8549	-0.609042	0.406992	0.00837882	0.114415
RIN3	589.28	0.567054	0.367821	0.00838112	0.114415
TTLL7	4023.58	-0.418999	0.214764	0.0083823	0.114415
SAAL1	1504.27	-0.312846	0.141387	0.00839493	0.114522
LINC01224	254.173	-0.647367	0.458039	0.0084748	0.115544
USH1C	156.403	-0.746692	0.644073	0.00847937	0.115544
PRKX	2351.49	-0.479099	0.268953	0.00850856	0.115876
PRICKLE2-AS1	12.318	0.0638882	0.243445	0.00852358	0.116016
LOC102723896	21.3356	-0.81506	0.894587	0.00853183	0.116055
LINGO4	7.65513	0.0828887	0.25217	0.00853608	0.116055
IFIT1	1332.38	0.587202	0.400062	0.00856594	0.116396
IL1RN	13.1817	0.131123	0.285365	0.00858154	0.116525
PANK1	3649.9	0.37103	0.184953	0.00858507	0.116525
SLC40A1	22369.3	0.48315	0.268403	0.00859357	0.116531
LOC105378369	44.4848	-0.782195	0.775609	0.00859936	0.116531
CCDC85C	769.998	0.557061	0.359974	0.00859999	0.116531
ZFP36L2	9292.38	-0.302802	0.136126	0.00860563	0.116542
ZNF48	735.654	-0.463384	0.253523	0.00861639	0.116623
ORAI3	1173.47	0.504625	0.298806	0.00862976	0.116728
LINC00710	9.52305	0.123241	0.278623	0.00863381	0.116728
ARAP2	534.784	0.709677	0.728561	0.00865396	0.116935
SLC29A2	2391.92	-0.376446	0.18462	0.00866309	0.116993
RNASEH2A	1827.61	-0.394254	0.197157	0.00869676	0.117318
STS	1903.8	-0.465922	0.25445	0.00869686	0.117318
SLC48A1	1639.39	0.449175	0.244891	0.00870178	0.117319
OSBPL6	2050.94	-0.51286	0.302312	0.00873326	0.117676
ST6GALNAC2	69.5927	-0.626528	0.439633	0.00873803	0.117676
PRIM1	1181.52	-0.46433	0.256054	0.00875158	0.117793
NFKB2	1130.72	0.574057	0.38822	0.00879838	0.11832
IL6ST	18310.6	0.57222	0.38048	0.00880047	0.11832
POF1B	8.70234	0.103616	0.264231	0.0088079	0.118354
SLITRK1	478.656	0.652175	0.533424	0.00883082	0.118596
GAS7	1495.01	0.649085	0.52611	0.00883781	0.118624
RGS14	908.755	0.458861	0.25575	0.00884401	0.118641
HERC4	3417.97	-0.250139	0.10793	0.00886139	0.118794
CCDC30	286.885	0.400718	0.205352	0.00886519	0.118794
PTGER3	1932.74	0.156845	0.310849	0.00887523	0.118832
SNAPC3	6840.02	-0.315314	0.144741	0.00888029	0.118832
EGR3	360.418	-0.735316	0.661717	0.00889082	0.118832
LOC105374798	300.01	-0.762858	0.756629	0.00889225	0.118832
CFB	41.9766	0.410903	1.27331	0.00889262	0.118832
LOC105375520	58.6035	0.596481	2.18876	0.00897389	0.119852
LOC101927268	6.51422	0.0824995	0.251918	0.00899266	0.120036
GPM6A	657.514	0.165632	0.320724	0.00900981	0.120199
CAND1.11	18.9468	-0.210709	0.385724	0.00901562	0.12021
LOC105376088	3.30161	0.051742	0.23907	0.00902611	NA
NHSL1	5884.18	0.429777	0.230307	0.00903562	0.12041
B4GALT6	619.161	0.480533	0.279094	0.00905012	0.120501
LOC440173	2878.11	-0.436007	0.233513	0.00905243	0.120501
SH2D1A	3.37739	0.050835	0.238787	0.00907296	NA
PCMTD1	5597.06	0.282868	0.125863	0.00908064	0.120811
PHRF1	220.668	-0.550325	0.348557	0.00911364	0.121079
KIF5C	187.974	0.322236	0.684452	0.00911621	0.121079
SERTM1	607.113	0.131211	0.285475	0.00911694	0.121079
COLQ	383.579	0.45907	0.258499	0.00912088	0.121079
ART3	516.714	-0.618058	0.439737	0.00912724	0.121097
TTC38	1681.06	-0.284824	0.12648	0.00913235	0.121099
SLC35G2	550.258	0.347185	0.166645	0.00915534	0.121337
LOC107984352	39.4764	-0.777444	0.976542	0.00916271	0.121352
MAPK8IP2	75.0397	0.255418	0.474428	0.00916654	0.121352
SMAD6	986.728	0.508452	0.311887	0.00921683	0.121952
C2orf15	83.4597	0.431165	1.40926	0.00924815	0.122299
RIPK3	54.2507	0.667934	0.601197	0.00925812	0.122315
LINC00645	78.2404	0.169656	0.325328	0.00925947	0.122315
YWHAH	8738.59	-0.393558	0.197072	0.00929043	0.122593
TPTE2P2	7.13765	0.124596	0.279595	0.00929162	0.122593
LOC107985693	14.5926	0.254957	0.472784	0.00929857	0.122593
LOC107984834	4.26875	0.0978277	0.260666	0.009303	0.122593
TGFBR3	7871.23	0.496517	0.298974	0.00930885	0.122593
RASL11B	949.367	-0.438096	0.237503	0.00931113	0.122593
NPY2R	403.647	0.104177	0.26467	0.00931675	0.122593
LOC105377979	8.80996	0.0905339	0.256105	0.00932259	0.122593
PLA2R1	630.358	0.562293	0.383837	0.00932807	0.122593
LOC107985908	46.3802	0.686371	0.979613	0.0093355	0.122593
MANEA-DT	115.206	-0.499795	0.296795	0.00933624	0.122593
RHPN2	679.405	0.617089	0.4813	0.00938647	0.123185
ADGRA3	14051.5	-0.391835	0.199137	0.00939227	0.123195
ZNF57	276.289	-0.501295	0.298505	0.0094125	0.123393
HMGB2	20893.9	-0.468852	0.270303	0.00944576	0.123762
LINC00908	663.105	-0.3764	0.188328	0.00947601	0.124091
NNAT	34445.8	-0.48724	0.285078	0.00948293	0.124115
ARNT2	1283.38	0.445924	0.24957	0.00951343	0.124387
LOC105375633	7.1315	0.158633	0.312353	0.00951406	0.124387
NAPB	1018.53	0.34163	0.164471	0.00953337	0.124543
ACYP1	1458.32	-0.468964	0.267341	0.00953624	0.124543
LINC02244	79.1295	0.38462	0.997367	0.00954204	0.124551
LINC02221	8.90854	0.0882104	0.254791	0.00956538	0.124789
EML1	2085.48	0.372877	0.187724	0.0096166	0.125338
DYRK3	371.225	-0.426778	0.230138	0.0096179	0.125338
TRIM47	787.675	0.637596	0.544122	0.00963363	0.125476
BYSL	1157.41	-0.414638	0.219335	0.00965802	0.125726
FBN2	21970.6	0.581091	0.404335	0.00970049	0.126211
LOC105370994	15.5564	-0.118301	0.27483	0.0097225	0.126429
TSPOAP1	572.387	0.486826	0.294194	0.00975214	0.126746
CD99P1	20.7071	0.134566	0.288029	0.00977411	0.126964
ENHO	422.765	-0.67873	0.590764	0.00978186	0.126996
DAAM1	6167.55	-0.434781	0.246687	0.00979751	0.127131
GINS1	3623.21	-0.446047	0.249864	0.00982109	0.127369
KIF25-AS1	8.03627	-0.156816	0.310074	0.00985672	0.12771
LOC105375715	4.20377	0.0966254	0.259855	0.00986189	0.12771
LOC105374848	86.0874	0.663465	0.936898	0.00986321	0.12771
ZPR1	3299.41	-0.306404	0.141743	0.00989464	0.128048
LINC01963	193.982	0.55888	0.394557	0.00991784	0.12828
CD8A	9.07611	0.0811029	0.251069	0.00995885	0.128741
LOC653160	393.679	-0.558547	0.375556	0.0099828	0.128982
NUPR1	7420.18	0.658375	0.659741	0.00999695	0.129096
ESRRB	15.5862	-0.137894	0.291317	0.0100084	0.129174
TDP1	3826.8	-0.373073	0.185328	0.0100331	0.129425
TTF1	2398.13	-0.357851	0.177986	0.010039	0.129432
KIF20A	5130.67	-0.486065	0.28989	0.0100487	0.129487
SLC9A7	375.499	0.567753	0.412111	0.0100775	0.129789
SEMA3B-AS1	31.5146	0.520167	1.7234	0.010171	0.130894
ST6GALNAC5	2516.5	-0.45501	0.258437	0.0101741	0.130894
CTNND2	251.297	0.474587	0.285572	0.0102178	0.131387
LOC107987148	10.3781	0.139266	0.292123	0.0102378	0.131573
AURKB	3032.94	-0.496036	0.302639	0.0102765	0.13193
LOC101927741	3073.51	-0.625752	0.485522	0.0102796	0.13193
GAU1	17.3341	-0.126583	0.281342	0.0102819	0.13193
DGLUCY	1693.5	0.419134	0.229506	0.0102951	0.13203
CDH4	127.877	0.569487	0.421622	0.0103024	0.132036
FLJ12825	11.7686	0.151108	0.303775	0.0103065	0.132036
RASGRP1	179.546	-0.547146	0.366985	0.0103221	0.132165
PITPNM2	197.79	-0.539235	0.356694	0.01034	0.132325
ITPRIPL1	1158.59	-0.387408	0.201154	0.0103572	0.132475
SMTNL2	2967.78	0.452725	0.266001	0.0103695	0.132562
TMEM252	40.2949	0.263742	0.489414	0.0103781	0.132601
SLC24A2	1501.03	0.42971	0.24108	0.0103969	0.132731
NTRK1	448.854	-0.652291	0.564362	0.0103992	0.132731
NOP2	2437.22	-0.352333	0.174764	0.0104186	0.13287
PRL	43.0376	0.647731	0.867947	0.0104232	0.13287
C1orf61	78.6009	0.133168	0.286784	0.0104302	0.13287
FOXP1	13799.7	-0.382556	0.191506	0.0104321	0.13287
PPP4R1L	491.266	-0.344382	0.169195	0.0104646	0.133214
CACNA1G	917.713	0.532037	0.356833	0.0104835	0.133385
LOC105369309	2.48697	0.0599932	0.241796	0.0104952	NA
LOC107987128	44.9891	-0.690779	0.762595	0.0105461	0.134111
LOC107987064	11.7522	0.121903	0.277262	0.0105543	0.134145
UBBP4	100.774	0.483092	0.297559	0.0105615	0.134153
ADAMTS2	1652.14	0.599757	0.50456	0.0105661	0.134153
TNFAIP2	1805.5	0.589044	0.466822	0.0105719	0.134156
ALDOA	1786.38	-0.364416	0.184791	0.0105775	0.134158
GRIK4	132.801	-0.545964	0.371219	0.0105832	0.134159
LOC105372640	98.3568	-0.685819	0.835097	0.0105914	0.134193
TROAP	1688	-0.444317	0.252949	0.0106005	0.134197
C1orf112	812	-0.409425	0.22219	0.0106028	0.134197
LOC107986424	15.3875	0.172188	0.327333	0.010612	0.134243
INGX	18.7307	-0.0928722	0.257556	0.0106509	0.134654
SLC5A3	2145.95	0.487332	0.307891	0.0106557	0.134654
NEK6	6801.43	-0.302925	0.141676	0.0106632	0.134679
LINC01621	2.39144	0.0613833	0.242293	0.0106843	NA
BRS3	3.45445	0.0472573	0.237689	0.0106918	NA
SPINT2	5005.7	0.558352	0.413109	0.0107186	0.135237
TH	84.3656	0.616923	0.993515	0.0107186	0.135237
RFC3	3034.46	-0.42184	0.23292	0.0107419	0.135461
ZC2HC1B	3.23236	0.0492865	0.23828	0.0107502	NA
GRPEL2	2443.67	-0.300551	0.141189	0.0107726	0.135707
CCDC3	4288.3	-0.472761	0.283485	0.0107816	0.135707
PCARE	55.2223	0.630252	0.87658	0.0107865	0.135707
ITGA1	1447.8	-0.602912	0.468592	0.0107888	0.135707
CARD16	69.282	0.249432	0.455155	0.0107895	0.135707
CRHBP	4.04624	0.0610421	0.242158	0.0108088	0.135814
LOC105370224	96.8041	-0.58835	0.44474	0.0108092	0.135814
MVB12B	2926.01	-0.378404	0.196353	0.010829	0.135993
SGMS1	1719.01	0.459944	0.28106	0.0108459	0.136134
DSC2	3306.5	0.1224	0.278576	0.0108686	0.136348
TBX18	1717.5	-0.506768	0.324271	0.0108878	0.136518
LOC105371376	10.4852	0.114822	0.271783	0.0108954	0.136542
LOC105377713	45.4651	0.123817	0.278763	0.010917	0.136677
STMN3	1122.61	0.459165	0.278923	0.0109175	0.136677
ERI1	2790.88	-0.330017	0.159505	0.0109354	0.136831
KLHL14	1985.88	-0.598246	0.467874	0.010944	0.13685
TEX11	19.3895	0.170607	0.325255	0.0109482	0.13685
CPNE7	84.9523	-0.664642	0.677491	0.0109601	0.136928
LOC105370500	48.1687	-0.635319	0.548543	0.0109707	0.13699
TSPYL2	2788.32	0.368671	0.189956	0.0110072	0.13732
ILF2	19580	-0.239694	0.104607	0.0110098	0.13732
HOXA11-AS	75.3804	0.289777	0.553096	0.0110142	0.13732
ZDHHC15	631.142	0.454113	0.271221	0.011022	0.137346
SMC4	10109.1	-0.420473	0.234171	0.0110334	0.137417
LOC105370804	83.0592	0.596874	0.51662	0.0110398	0.137427
ACVR2A	62916.8	-0.504983	0.292332	0.0110632	0.137592
LOC105370124	17.6563	-0.677209	0.93674	0.0110645	0.137592
SPRED2	3031.08	0.316057	0.149994	0.0110738	0.137637
CYSTM1	2271.48	0.419169	0.236511	0.0111138	0.138001
IFT122	2669.74	0.313427	0.150578	0.0111199	0.138001
ATAD2	9305.97	-0.493799	0.311874	0.0111269	0.138001
LOC105379720	4.84442	0.0773829	0.24927	0.0111269	0.138001
ENO1	70700	-0.377036	0.196774	0.0111316	0.138001
FANCI	5158.98	-0.46581	0.279579	0.011149	0.138053
PDGFRA	13084.5	0.493423	0.318746	0.011152	0.138053
LOC107986116	5.39238	0.0898347	0.255723	0.011159	0.138053
LOC105379332	41.6188	-0.0526839	0.239391	0.0111641	0.138053
LOC112268237	5.49081	0.0914549	0.256541	0.0111643	0.138053
LOC107985209	96.6449	0.549963	0.408737	0.0111802	0.138179
LINC01703	71.7314	-0.477564	0.294049	0.0112205	0.138606
BRCA1	1647.08	-0.467712	0.280319	0.0112312	0.138667
CCDC84-DT	66.729	0.566968	0.445358	0.0112534	0.138871
NTNG2	107.544	0.58401	0.491478	0.0112708	0.139014
HABP4	3817.13	-0.296501	0.140142	0.0112928	0.139214
SH2D6	78.4569	0.602761	0.564836	0.0113139	0.139373
POU4F1	451.286	0.609388	0.647618	0.0113172	0.139373
HIVEP3	623.283	0.381938	0.888488	0.011327	0.139423
LINC00871	3.08544	0.0499683	0.238472	0.0113306	NA
NRXN3	657.803	-0.365836	0.188973	0.0114049	0.140311
FRMD4A	1850.32	-0.347752	0.17565	0.0114328	0.140491
RASL10A	205.04	0.538111	0.39264	0.0114358	0.140491
LOC105378669	7.2667	-0.116819	0.273198	0.0114396	0.140491
AHSP	16.0753	0.147235	0.29945	0.0114428	0.140491
MPHOSPH9	4882.7	-0.361732	0.185827	0.0114623	0.140621
UPF3B	2795.6	-0.373755	0.195615	0.011465	0.140621
UGT2B17	3.46204	0.0459299	0.237301	0.0114711	NA
FCF1	2770.6	-0.28035	0.131197	0.0114737	0.140656
YY1P2	9.54786	0.107064	0.266151	0.0114844	0.140677
RHBDL2	70.7522	0.535235	1.16655	0.011487	0.140677
SGCA	6875.33	-0.455701	0.272325	0.0115128	0.140866
SHISA6	32.42	0.104935	0.264824	0.0115141	0.140866
GINS4	521.654	-0.520456	0.351545	0.0115458	0.141182
LOC105375119	16.2451	0.380399	0.87972	0.0115578	0.141239
SMCO3	74.275	0.59724	0.887441	0.0115621	0.141239
NDC1	4103.2	-0.319113	0.155055	0.0115855	0.141453
ZFPM2	3179.6	0.524551	0.37362	0.011602	0.141516
BCL2	536.594	0.564777	0.460809	0.0116052	0.141516
[truncated: 36,558 more rows]
