# Supplementary material
Source: Research Square preprint supplement (doi:10.21203/rs.3.rs-9408825/v1)
Supplement: Supplementary file 4 [file e120ec4cb529e70b869d6379.xlsx]

## Sheet: PAX7_D5_vs_D10
Gene	baseMean	log2FoldChange	lfcSE	stat	pvalue	padj
MZT2B	4.8494	-4.21182	0.513725	-8.1986	2.43208e-16	3.00361e-13
MTRNR2L1	140.724	1.44659	0.266679	5.42446	5.81291e-08	3.58947e-05
GCNT2	5.19475	3.01572	0.651838	4.62649	3.71922e-06	0.00114831
HSPA8	7.83227	-1.86034	0.399124	-4.66106	3.14589e-06	0.00114831
LYRM2	39.847	-1.29912	0.295417	-4.39759	1.09457e-05	0.0027036
NPM1	12.6708	-1.45848	0.338338	-4.31072	1.62722e-05	0.00334936
CCND2	8.8054	-1.55897	0.380895	-4.09291	4.25988e-05	0.00657619
CCNG2	4.76822	-1.76429	0.430873	-4.09469	4.22737e-05	0.00657619
C4orf46	26.9882	-1.15154	0.285979	-4.02666	5.65741e-05	0.00733758
RAD23B	14.3976	-1.28928	0.321105	-4.01513	5.94136e-05	0.00733758
DELE1	7.73205	2.57703	0.656649	3.92451	8.6906e-05	0.00975718
TMEM213	11.8389	-1.24691	0.324104	-3.84726	0.000119445	0.0122929
PDLIM7	11.6001	-1.30884	0.351267	-3.72606	0.000194494	0.0171384
OLFML3	7.45744	-1.38146	0.372471	-3.7089	0.000208158	0.0171384
MALRD1	8.93537	-1.29633	0.346246	-3.74396	0.000181146	0.0171384
OLFML2A	7.60257	-1.6229	0.446889	-3.63155	0.000281726	0.0217457
NYAP1	6.75355	-1.28767	0.361441	-3.5626	0.000367207	0.0266765
TRIR	4.30561	-1.65188	0.472204	-3.49823	0.000468351	0.0321341
TUBA1C	45.3326	-1.05936	0.304669	-3.4771	0.00050687	0.0321486
SLC9A5	4.33894	2.74174	0.790147	3.46991	0.000520625	0.0321486
PDCD4	34.0054	-0.913766	0.266992	-3.42245	0.000620603	0.0346945
USP22	4.71677	-1.49176	0.437276	-3.41147	0.000646132	0.0346945
RPN1	4.24558	-1.80205	0.525182	-3.43128	0.00060073	0.0346945
CDC37	5.87499	-1.46056	0.431561	-3.38437	0.000713424	0.0367116
SIGMAR1	9.2219	-1.14578	0.343215	-3.33838	0.000842675	0.0416281
PXDN	7.14148	-1.34259	0.403568	-3.32681	0.000878453	0.0417265
GTF2I	5.98345	-1.28811	0.391481	-3.29034	0.00100065	0.044136
TXLNA	4.06187	-1.88852	0.573358	-3.2938	0.000988442	0.044136
CLVS1	4.66403	2.39408	0.742883	3.22269	0.00126995	0.0540822
CD63	16.3625	-1.19152	0.377806	-3.15378	0.00161169	0.066348
PHAX	16.1413	-0.959344	0.308198	-3.11275	0.00185355	0.0715356
PCBP1	8.56748	-1.25331	0.402603	-3.11303	0.00185178	0.0715356
HNRNPL	7.08331	-1.31005	0.422923	-3.09762	0.00195083	0.0730082
ZNF587	38.5961	-0.824378	0.269465	-3.05932	0.00221842	0.0782784
BTBD6	8.20154	-1.15328	0.376378	-3.06416	0.00218282	0.0782784
SEPTIN11	5.39847	-1.25648	0.412952	-3.04268	0.00234485	0.0804415
LRRN1	4.62859	-1.18296	0.391768	-3.01955	0.00253152	0.0844979
SPARC	37.9073	-0.832838	0.277559	-3.00058	0.00269466	0.0853308
ARHGEF26	5.32581	2.5297	0.841401	3.00653	0.00264252	0.0853308
RPS4X	14.2802	-1.0571	0.35359	-2.98963	0.00279318	0.0862395
CDKN1C	5.57563	-1.30807	0.439952	-2.97322	0.00294694	0.0887674
RPL27	9.05923	-1.00859	0.341346	-2.95475	0.00312923	0.090301
ZNF208	7.13177	-1.23283	0.417443	-2.95329	0.00314408	0.090301
MYOM2	3.89112	2.46049	0.83675	2.94053	0.00327653	0.0919663
SON	5.11646	-1.369	0.467291	-2.92966	0.00339331	0.0931275
CCDC112	5.47367	-1.40829	0.482758	-2.91717	0.00353225	0.0948333
PTMA	20.6314	-1.02038	0.352597	-2.89389	0.00380499	0.099839
GRIA2	4.43399	-1.60007	0.554095	-2.88773	0.00388038	0.099839
MAGEA3	16.4485	-0.888454	0.308381	-2.88103	0.0039638	0.0999039
HNRNPA1	25.3279	-0.938962	0.328498	-2.85835	0.0042585	0.105185
TASOR2	13.8773	-0.913328	0.32163	-2.83968	0.00451585	0.106505
DDX5	9.16842	-1.14254	0.402894	-2.83583	0.00457065	0.106505
CTNNB1	5.22971	-1.18262	0.41609	-2.84223	0.00447989	0.106505
ART1	9.5013	1.23025	0.435679	2.82377	0.00474629	0.108549
TPM2	27.6554	0.968089	0.34538	2.80297	0.00506347	0.110144
RPS6	10.1433	-1.14049	0.407071	-2.80169	0.00508357	0.110144
FGD3	6.62159	1.61983	0.575817	2.8131	0.0049067	0.110144
SPATS2L	5.7292	-1.27565	0.45744	-2.78866	0.00529262	0.112696
ZNF506	48.8042	-0.865484	0.312556	-2.76906	0.00562191	0.114545
MYH8	6.33483	1.26812	0.459948	2.7571	0.00583167	0.114545
JPH4	13.3548	-0.918772	0.333317	-2.75645	0.00584319	0.114545
HNRNPH3	6.34793	-1.16149	0.419938	-2.76586	0.00567732	0.114545
P4HB	5.61065	-1.28229	0.461757	-2.77698	0.00548657	0.114545
ETV3	31.6047	-0.766931	0.289295	-2.65103	0.0080246	0.121938
ACSF2	15.9328	-0.79155	0.299447	-2.64338	0.00820839	0.121938
SIGIRR	12.5119	-0.962009	0.358386	-2.68428	0.00726863	0.121938
EEF1G	15.0495	-0.949746	0.358333	-2.65046	0.00803826	0.121938
ZNF540	14.734	-0.802504	0.303775	-2.64177	0.00824731	0.121938
ARRDC1	13.1145	-0.844251	0.317836	-2.65625	0.0079016	0.121938
PPIA	13.3978	-1.07872	0.396233	-2.72242	0.0064805	0.121938
ADAM15	8.81306	-1.18401	0.447117	-2.64809	0.00809477	0.121938
RPL10A	15.2532	-1.0472	0.396686	-2.63987	0.00829377	0.121938
ANKRD36	10.6767	-0.957988	0.354442	-2.70281	0.00687564	0.121938
MORF4L1	8.19287	-1.2112	0.448466	-2.70077	0.00691791	0.121938
ADCY6	7.45641	-1.05186	0.387165	-2.71682	0.00659127	0.121938
CHRND	3.88745	-1.18752	0.440217	-2.69759	0.00698437	0.121938
MYLK4	6.93731	-0.998703	0.375031	-2.66299	0.00774496	0.121938
FXR1	4.46983	1.45852	0.550475	2.64956	0.00805969	0.121938
PGD	5.3284	-1.24365	0.470543	-2.64301	0.0082173	0.121938
PUF60	4.60388	-1.14526	0.433706	-2.64063	0.00827516	0.121938
ENO1	5.11782	-1.27483	0.473023	-2.69507	0.00703731	0.121938
LAIR1	7.87572	1.57296	0.584585	2.69073	0.00712956	0.121938
PTCD3	4.03058	-1.50946	0.554744	-2.72101	0.00650834	0.121938
CHSY1	5.43404	-1.19013	0.45003	-2.64455	0.00817997	0.121938
HSPB1	3.9909	-1.21667	0.462367	-2.63141	0.00850325	0.123547
TNC	22.3309	-1.13235	0.431946	-2.62151	0.00875423	0.123761
NBPF15	11.5957	-0.918761	0.350805	-2.61901	0.00881862	0.123761
NPAP1L	5.45222	-1.39694	0.53203	-2.62569	0.0086474	0.123761
NDST1	3.96586	-1.22632	0.470978	-2.60377	0.00922055	0.127948
IL32	4.27077	-1.05261	0.406026	-2.59247	0.00952902	0.130759
PRRT2	9.28721	-0.887319	0.344714	-2.57407	0.0100509	0.136405
DUX5	51.4859	-0.718291	0.284165	-2.52773	0.0114803	0.144754
BIN1	6.69328	1.11585	0.442077	2.52412	0.0115989	0.144754
PFN1	14.2146	-1.05093	0.416963	-2.52044	0.011721	0.144754
MAGED1	10.2357	-0.933022	0.368715	-2.53047	0.0113911	0.144754
CASP2	7.06571	-1.05978	0.419434	-2.52668	0.0115146	0.144754
NBL1	6.55184	-1.06813	0.423537	-2.52193	0.0116714	0.144754
AGPAT1	3.81057	-1.18266	0.464921	-2.54378	0.010966	0.144754
ADGRA2	4.65044	1.98992	0.784003	2.53815	0.0111439	0.144754
LFNG	3.84853	-1.25978	0.497618	-2.53163	0.0113534	0.144754
TWSG1	3.81993	-1.12171	0.449182	-2.49724	0.0125164	0.153048
ACTA1	69.8778	0.990097	0.398071	2.48724	0.012874	0.153178
FABP1	19.4791	-0.728286	0.292891	-2.48654	0.0128992	0.153178
SRSF9	7.05055	-1.00811	0.405003	-2.48914	0.0128053	0.153178
WTAP	4.21994	1.60098	0.647815	2.47135	0.0134604	0.15832
MYADM	9.34921	-1.00412	0.4089	-2.45567	0.0140623	0.163839
HMGN2	10.2976	1.02458	0.417847	2.45205	0.0142046	0.16395
RPL31	10.9703	-1.05542	0.431037	-2.44856	0.0143427	0.164011
RPS24	19.0924	-0.930489	0.382245	-2.43427	0.0149218	0.169068
PTP4A3	7.47175	-0.924709	0.380399	-2.43089	0.0150618	0.169103
DYNLL1	5.73634	1.50478	0.620775	2.42404	0.0153489	0.170774
LIMD1	3.96635	1.51603	0.630163	2.40578	0.016138	0.177951
GAL3ST2	13.4024	-0.837127	0.348966	-2.39888	0.0164453	0.178157
JPT1	4.35142	-1.15532	0.48127	-2.40056	0.0163702	0.178157
RPL8	7.56162	-1.01823	0.427034	-2.38442	0.017106	0.183704
DCN	8.19348	-0.826609	0.34882	-2.36973	0.0178011	0.189521
TMEM106C	63.5142	-0.655763	0.277706	-2.36135	0.0182083	0.192199
TUSC2	38.527	-0.664603	0.284297	-2.33771	0.0194024	0.199683
HNRNPCL3	12.8262	-0.815533	0.348094	-2.34285	0.0191368	0.199683
NECTIN1	4.47618	-1.08023	0.461496	-2.34072	0.0192465	0.199683
ZNF723	20.4473	-0.683476	0.293552	-2.32829	0.0198967	0.200965
ANXA2	8.24258	-1.01201	0.435074	-2.32606	0.0200151	0.200965
PDLIM4	4.32977	-1.20855	0.5187	-2.32997	0.0198079	0.200965
PDE7A	25.6635	-0.712135	0.306769	-2.32141	0.020265	0.201833
S100A6	16.5612	-1.10593	0.47844	-2.31152	0.020804	0.205543
RAPSN	4.32594	-1.00433	0.437155	-2.29742	0.021595	0.211665
RPL13A	7.70779	-1.05797	0.463139	-2.28434	0.0223513	0.215656
NBPF26	5.96802	1.35728	0.593985	2.28503	0.0223108	0.215656
NOTCH3	10.4038	1.01016	0.44288	2.2809	0.0225545	0.215929
FUS	9.23973	-0.804891	0.353818	-2.27487	0.0229135	0.217679
WASHC4	4.08909	1.57139	0.691948	2.27096	0.0231494	0.218241
FSTL1	11.1705	-0.855631	0.379517	-2.25453	0.0241629	0.22607
LENG1	59.2725	-0.579476	0.259229	-2.23538	0.0253921	0.235784
CLIC4	4.96017	-0.983375	0.440837	-2.2307	0.0257011	0.236872
CCDC88B	18.0111	-0.673364	0.304004	-2.21499	0.026761	0.237203
RCN1	6.65796	-0.91161	0.410962	-2.21824	0.0265388	0.237203
POSTN	5.6331	1.1045	0.496369	2.22516	0.0260706	0.237203
LDHB	5.72804	-1.01026	0.45763	-2.20758	0.0272735	0.237203
CALU	8.22088	-0.852838	0.385798	-2.21058	0.0270647	0.237203
SND1	4.30902	-1.08283	0.490196	-2.20897	0.0271769	0.237203
AGAP1	4.27287	-1.05719	0.477263	-2.21511	0.0267523	0.237203
ARPC3	4.28147	-1.25954	0.568304	-2.21631	0.0266704	0.237203
ACTN1	5.02352	1.21985	0.553621	2.20341	0.027566	0.23807
TPM1	15.8296	0.676243	0.308051	2.19523	0.028147	0.23969
EPC1	8.94407	-0.811781	0.370286	-2.19231	0.0283571	0.23969
ATP2B4	5.13374	-0.909713	0.415409	-2.18992	0.02853	0.23969
CD276	4.77689	-1.03598	0.472657	-2.19182	0.0283925	0.23969
SRSF5	12.8749	-0.828509	0.379497	-2.18318	0.0290228	0.242183
CCDC110	6.28384	-0.808452	0.371906	-2.17381	0.0297197	0.246334
AP3D1	3.95833	-1.0773	0.496567	-2.1695	0.0300451	0.247163
DUSP5	4.0089	1.37286	0.633475	2.1672	0.0302199	0.247163
EIF4G1	4.66476	-1.01045	0.467244	-2.16257	0.0305742	0.248415
MARCKS	11.457	-0.754723	0.350797	-2.15145	0.0314403	0.253783
ATP5MC3	5.85307	1.13947	0.533841	2.13447	0.0328043	0.256288
KRTAP10-10	8.60885	-0.811427	0.380262	-2.13387	0.0328538	0.256288
DDX50	7.90149	-0.749686	0.350874	-2.13662	0.0326287	0.256288
PTP4A2	4.10761	1.24768	0.584451	2.13479	0.0327783	0.256288
SNURF	5.0661	1.14139	0.534353	2.13601	0.0326783	0.256288
SMARCC2	5.1113	1.30851	0.613708	2.13213	0.0329958	0.256288
RGS18	13.4768	-0.679808	0.321846	-2.11221	0.0346682	0.265933
WBP4	3.9764	-0.976288	0.462088	-2.11278	0.03462	0.265933
C3orf22	4.05739	1.64368	0.781805	2.10242	0.0355167	0.27076
MYL6B	10.8175	-0.778628	0.371117	-2.09806	0.0358994	0.271999
FKBP1A	4.43348	-1.00838	0.482428	-2.09021	0.0365986	0.275605
RPL28	10.7092	-0.951045	0.456728	-2.0823	0.0373149	0.279296
DYNC1H1	27.9528	-0.614428	0.296081	-2.07521	0.0379675	0.280408
RPL9	14.5408	-0.801372	0.385868	-2.07681	0.0378195	0.280408
ACIN1	5.35596	-0.883003	0.425992	-2.07281	0.0381896	0.280408
IGHG3	4.6674	1.06766	0.515561	2.07086	0.0383716	0.280408
RNF167	8.6	-0.710083	0.345132	-2.05742	0.0396456	0.28697
DPPA2	4.29664	1.13918	0.553943	2.0565	0.0397343	0.28697
OVOL1	6.03373	-0.780732	0.380712	-2.05072	0.0402945	0.289077
TRIO	6.5137	-0.871022	0.425164	-2.04867	0.0404941	0.289077
DDX17	20.7525	-0.648094	0.318757	-2.03319	0.0420333	0.292407
TMEM50B	14.0195	-0.632622	0.310134	-2.03984	0.0413666	0.292407
ILF3	10.0094	-0.704515	0.346979	-2.03042	0.0423135	0.292407
RPS26	4.61571	-0.961389	0.472406	-2.03509	0.0418416	0.292407
STOX2	4.72749	-0.84588	0.416739	-2.02976	0.0423812	0.292407
SELENBP1	3.82022	-1.20977	0.595789	-2.03053	0.0423025	0.292407
SEPTIN5	5.11196	-0.883171	0.436134	-2.025	0.0428672	0.292798
CTDSP2	4.01902	-1.04152	0.514443	-2.02457	0.042912	0.292798
MAPKBP1	8.76991	-0.724684	0.358614	-2.02079	0.0433017	0.293833
PAGE5	6.6762	0.853234	0.424288	2.01098	0.0443276	0.294216
HSP90B1	7.20356	-0.779734	0.38663	-2.01674	0.0437225	0.294216
C8orf58	5.64994	-0.860231	0.427418	-2.01262	0.0441545	0.294216
CBX8	4.23326	-0.875378	0.43624	-2.00664	0.0447875	0.294216
SNAP29	4.37282	1.23423	0.61269	2.01445	0.0439627	0.294216
PCM1	4.39466	-0.906576	0.45148	-2.00801	0.0446424	0.294216
OCIAD1	4.41368	-0.838325	0.421116	-1.99072	0.0465115	0.303924
RPL19	19.2383	0.850259	0.427747	1.98776	0.0468382	0.304448
RPL36	6.63964	-0.913439	0.461161	-1.98074	0.0476207	0.307109
TUBB2A	4.89754	-0.977574	0.493816	-1.97963	0.0477449	0.307109
SLC5A5	4.00298	1.2296	0.622139	1.9764	0.0481092	0.307849
PDGFC	3.98641	-0.942942	0.477856	-1.97328	0.0484642	0.308522
SLC37A3	4.2532	1.30396	0.664299	1.96291	0.0496566	0.314492
HNRNPU	11.4704	-0.668716	0.342127	-1.95458	0.0506325	0.317367
EIF2S3B	6.71888	-0.743957	0.381032	-1.95248	0.0508815	0.317367
HNRNPH1	6.43409	-0.823836	0.421553	-1.95429	0.050667	0.317367
MYH1	14.7559	0.768002	0.395402	1.94233	0.0520967	0.323314
NFAM1	10.4069	-0.643526	0.332033	-1.93814	0.0526061	0.324843
CIRBP	4.31225	-0.986791	0.511388	-1.92963	0.0536521	0.329654
IGF2	100.513	-0.633204	0.330183	-1.91774	0.0551445	0.330936
TPM4	9.99579	-0.717562	0.372849	-1.92454	0.0542872	0.330936
HSPA5	5.25586	-0.91058	0.474739	-1.91807	0.0551027	0.330936
LOXL1	5.04415	-0.89976	0.469286	-1.91729	0.0552006	0.330936
H4C5	7.88628	-0.862282	0.448952	-1.92066	0.0547751	0.330936
GNAS	13.2111	0.747346	0.390497	1.91383	0.0556413	0.331966
GATA2	3.93832	-0.835531	0.437477	-1.90989	0.0561478	0.333378
RPL26L1	5.36192	-0.796194	0.421599	-1.88851	0.0589573	0.343454
MPZL1	6.45763	-0.759275	0.401882	-1.8893	0.0588521	0.343454
MECP2	5.95477	1.05072	0.554582	1.89461	0.0581439	0.343454
LRRFIP2	5.34003	-0.849997	0.449336	-1.89167	0.0585348	0.343454
TMEM30A	16.2474	-0.560035	0.297268	-1.88394	0.0595733	0.345413
NPIPB6	10.0533	-0.676624	0.359643	-1.88138	0.0599204	0.345802
CANX	6.4163	-0.77086	0.410336	-1.8786	0.0602985	0.346366
PXN	4.27994	1.06284	0.567129	1.87407	0.0609212	0.348322
PRDM5	7.86449	-0.766881	0.410467	-1.86831	0.0617183	0.351065
MAP4	4.87976	-0.878409	0.470615	-1.86651	0.0619694	0.351065
RPS20	11.9329	-0.839031	0.451825	-1.85698	0.0633136	0.355558
HNRNPR	4.83977	-0.792708	0.426919	-1.85681	0.0633382	0.355558
ABL1	4.78237	1.20709	0.651549	1.85265	0.0639326	0.357271
IK	4.26737	-0.892109	0.482514	-1.84888	0.0644756	0.358682
TPRA1	3.96468	1.03489	0.562454	1.83995	0.0657749	0.36125
UBL3	4.25025	-0.795157	0.432412	-1.83889	0.0659316	0.36125
SLC25A6	5.25741	-0.896187	0.487669	-1.83769	0.0661074	0.36125
ZCCHC10	3.91035	1.11888	0.60831	1.83933	0.0658671	0.36125
APOBEC3A_B	32.4455	-0.561056	0.309975	-1.81	0.0702953	0.361728
MAZ	13.6407	-0.637884	0.350386	-1.82052	0.06868	0.361728
TUBB4B	7.51136	-0.714879	0.391216	-1.82732	0.067651	0.361728
NEGR1	6.17863	-0.809313	0.444875	-1.81919	0.0688825	0.361728
HNRNPD	7.95104	-0.723985	0.399717	-1.81124	0.0701031	0.361728
ZNF207	6.79317	-0.824355	0.449888	-1.83236	0.0668984	0.361728
ZBTB7B	6.29598	-0.750781	0.413784	-1.81443	0.0696122	0.361728
CASP12	5.87773	1.03678	0.569474	1.82059	0.0686688	0.361728
MATR3	5.3473	-0.761235	0.418881	-1.8173	0.0691704	0.361728
U2AF1	6.04475	-0.774213	0.425075	-1.82136	0.0685528	0.361728
PARK7	4.18568	-0.949325	0.519899	-1.82598	0.0678531	0.361728
PDE4C	4.45828	-0.808291	0.446551	-1.81007	0.0702843	0.361728
H1-5	5.21258	-0.823142	0.452965	-1.81723	0.0691815	0.361728
C9orf47	3.93112	1.29349	0.705919	1.83234	0.0669003	0.361728
ATP2A1	5.51376	0.893023	0.494846	1.80465	0.0711295	0.363954
H3-3A	6.67466	-0.829805	0.460233	-1.80301	0.0713869	0.363954
SUMO1	3.93579	1.17187	0.650471	1.80158	0.071612	0.363954
VIM	45.2141	-0.538807	0.300782	-1.79135	0.0732365	0.366182
MYH4	3.96294	0.878866	0.490545	1.79161	0.0731951	0.366182
PRRG3	5.53033	-0.748033	0.416719	-1.79505	0.072645	0.366182
MATN2	4.15717	-0.824262	0.459812	-1.79261	0.0730359	0.366182
ARRB2	5.79753	-0.742874	0.415971	-1.78588	0.074119	0.369101
CREBBP	3.84117	-0.903696	0.507363	-1.78116	0.0748861	0.371423
LUC7L3	4.79783	-0.814556	0.458203	-1.77772	0.0754498	0.372722
CFL2	5.37716	0.847463	0.477894	1.77333	0.0761742	0.373314
UPP1	3.8386	-0.847137	0.477416	-1.77442	0.0759935	0.373314
PKM	8.16711	-0.813123	0.459013	-1.77146	0.0764843	0.373352
SEMA6B	4.68604	-0.87236	0.495127	-1.76189	0.0780876	0.37832
ZNF66	4.82286	-0.741043	0.420633	-1.76173	0.0781147	0.37832
CTSA	4.69385	0.94564	0.537719	1.75861	0.0786432	0.379392
DUX4	25.2134	-0.508317	0.289615	-1.75515	0.079234	0.380353
LPAR2	9.49102	-0.593615	0.338467	-1.75384	0.0794584	0.380353
RPS3A	19.5974	-0.67852	0.388261	-1.74759	0.0805356	0.384021
RPS12	19.9002	-0.635212	0.365237	-1.73918	0.0820032	0.389515
COL5A2	8.04152	-0.597465	0.345303	-1.73026	0.0835837	0.395501
RAC3	4.66212	1.05848	0.612675	1.72763	0.0840539	0.395653
PMP2	4.0953	-0.791756	0.458588	-1.72651	0.0842564	0.395653
HGF	13.1954	-0.558692	0.326175	-1.71286	0.0867387	0.405766
RPL41	20.6293	-0.625468	0.366819	-1.70511	0.0881731	0.408257
RUVBL2	15.1762	-0.505541	0.296863	-1.70294	0.0885789	0.408257
PLEC	8.13733	0.680066	0.398727	1.70559	0.088084	0.408257
NRBP1	5.47984	0.983749	0.577702	1.70286	0.0885935	0.408257
SENP3	5.1879	-0.662909	0.392395	-1.68939	0.0911444	0.412342
TAF15	5.27129	-0.747782	0.442119	-1.69136	0.0907684	0.412342
PPIB	5.04257	-0.766153	0.453335	-1.69004	0.0910211	0.412342
EID1	3.82976	-0.909549	0.538376	-1.68943	0.0911366	0.412342
LAMA4	6.6876	0.813646	0.481628	1.68937	0.0911492	0.412342
NCBP2	5.9844	-0.627048	0.373884	-1.67712	0.0935185	0.419983
MFAP4	5.48924	-0.788575	0.470045	-1.67766	0.093414	0.419983
RALA	3.81381	-0.869234	0.519473	-1.6733	0.0942683	0.421817
RANBP1	4.53365	-0.730864	0.43843	-1.667	0.0955137	0.425846
COL1A2	242.764	-0.506743	0.304991	-1.6615	0.0966123	0.429195
RPS8	21.789	-0.596465	0.359544	-1.65895	0.097126	0.429931
TUBB6	5.67442	-0.799098	0.482303	-1.65684	0.0975523	0.430275
COL3A1	55.0765	-0.458455	0.279044	-1.64295	0.100394	0.43416
ZNF470	11.393	-0.577338	0.351072	-1.6445	0.100073	0.43416
CFL1	6.34772	-0.734693	0.446535	-1.64532	0.099904	0.43416
PRDX2	6.26091	0.865844	0.524615	1.65044	0.0988538	0.43416
CBWD2	4.6618	-0.763614	0.464895	-1.64255	0.100476	0.43416
CEP55	4.32947	-0.756823	0.460851	-1.64223	0.100542	0.43416
PALLD	6.62839	0.89832	0.550152	1.63286	0.102499	0.439351
RPS19	9.24731	-0.743088	0.455499	-1.63137	0.102812	0.439351
TIAL1	4.06155	-0.761395	0.466609	-1.63176	0.10273	0.439351
FAM3C	11.5424	-0.516741	0.317952	-1.62522	0.104117	0.44257
TAGLN2	10.5055	-0.781777	0.481259	-1.62444	0.104282	0.44257
MYL6	9.10563	-0.671909	0.415008	-1.61903	0.105441	0.44531
IFI6	8.82321	0.734628	0.454882	1.61499	0.106314	0.44531
DLGAP4	4.17101	0.853328	0.528014	1.61611	0.106071	0.44531
SDC2	5.24301	-0.822768	0.50954	-1.61473	0.10637	0.44531
TNNT1	11.9966	-0.653967	0.407781	-1.60372	0.108776	0.448555
RPL14	11.6254	0.811834	0.506484	1.60288	0.108961	0.448555
SOGA1	4.4265	-0.891646	0.555877	-1.60404	0.108706	0.448555
SKI	4.86324	-0.739145	0.460445	-1.60528	0.108432	0.448555
DSTN	4.61601	-0.890213	0.553441	-1.60851	0.107724	0.448555
SLC25A3	5.65929	-0.816591	0.510267	-1.60032	0.109527	0.449388
PAM16	6.78353	0.710164	0.444218	1.59868	0.109891	0.449389
ATF4	6.16292	-0.704083	0.441114	-1.59615	0.110456	0.450208
GNL3	4.17305	-0.797364	0.500289	-1.59381	0.110979	0.450853
STRBP	4.16855	-0.693447	0.437544	-1.58486	0.112997	0.456051
TIPIN	4.7937	-0.683946	0.431435	-1.58528	0.112902	0.456051
MIDN	4.42994	-0.749103	0.47494	-1.57726	0.114736	0.461561
MMP14	6.81513	-0.666742	0.424584	-1.57034	0.116335	0.461974
TLK2	5.45854	-0.638934	0.40586	-1.57427	0.115424	0.461974
NR1H2	6.06685	-0.654899	0.416757	-1.57142	0.116086	0.461974
YWHAQ	4.11252	-0.783355	0.498108	-1.57266	0.115798	0.461974
ATP2A2	8.25656	-0.57735	0.368539	-1.56659	0.117211	0.462476
EDAR	4.48167	-0.716865	0.457511	-1.56688	0.117142	0.462476
CCDC189	7.91369	0.837288	0.535098	1.56474	0.117645	0.46271
MTRNR2L10	185.845	0.501847	0.323346	1.55204	0.120652	0.462749
KRAS	11.8711	-0.545464	0.349469	-1.56084	0.118562	0.462749
SSRP1	6.29351	-0.685853	0.440621	-1.55656	0.119575	0.462749
EIF4A2	5.24054	-0.639164	0.409766	-1.55983	0.118801	0.462749
TUBB2B	5.86851	-0.78267	0.503737	-1.55373	0.120249	0.462749
REPIN1	4.34054	-0.756041	0.486665	-1.55352	0.1203	0.462749
ZNF674	4.72858	-0.635071	0.408104	-1.55615	0.119672	0.462749
CTHRC1	5.86895	-0.794633	0.509522	-1.55956	0.118863	0.462749
PABPN1	4.00908	-0.774874	0.50082	-1.54721	0.121812	0.465753
NFKB2	4.22548	0.736582	0.476841	1.54471	0.122416	0.466616
THBS4	7.86405	-0.735468	0.476997	-1.54187	0.123105	0.467798
ZNF680	13.2091	0.576148	0.374622	1.53795	0.124062	0.469988
CHRNA1	4.73534	-0.676195	0.440436	-1.53529	0.124714	0.471013
KIF5B	4.17349	-0.77643	0.508658	-1.52643	0.126903	0.47782
FAM13B	32.694	-0.467359	0.30699	-1.52239	0.127912	0.479094
MEPCE	28.672	-0.495963	0.326396	-1.51951	0.128634	0.479094
RNF113A	8.0563	-0.576054	0.379519	-1.51785	0.129052	0.479094
FCF1	8.00498	-0.64679	0.426697	-1.5158	0.129569	0.479094
SERF2	5.14297	-0.877965	0.577061	-1.52144	0.128149	0.479094
EIF3F	4.39714	-0.827519	0.545553	-1.51685	0.129306	0.479094
ZNF586	5.97298	-0.674803	0.445898	-1.51336	0.130189	0.479909
PCGF3	4.02015	-0.685581	0.453465	-1.51187	0.130566	0.479909
KDM4E	4.4656	0.827803	0.54892	1.50806	0.13154	0.482052
TUBB	6.42714	-0.702474	0.466862	-1.50467	0.132408	0.4838
TMA7	21.8159	0.498921	0.332982	1.49834	0.134045	0.487118
TTC3	4.26395	-0.667258	0.445401	-1.49811	0.134105	0.487118
ZNF391	13.721	0.531283	0.361207	1.47086	0.14133	0.492171
BANK1	9.62919	0.591949	0.397903	1.48767	0.136837	0.492171
SEPTIN9	8.84978	0.722347	0.487455	1.48187	0.138374	0.492171
ZNF669	8.33422	-0.525881	0.355279	-1.48019	0.138822	0.492171
KCNAB3	6.71324	-0.589481	0.400919	-1.47032	0.141474	0.492171
RPL36A	7.76564	-0.658775	0.441832	-1.49101	0.13596	0.492171
NPFF	6.1037	-0.726448	0.49005	-1.4824	0.138235	0.492171
DIO1	4.74765	0.816362	0.55262	1.47726	0.139607	0.492171
RUNX1	4.76321	0.918876	0.621129	1.47936	0.139043	0.492171
PRKCSH	4.81203	-0.721621	0.488248	-1.47798	0.139413	0.492171
COL4A1	4.96014	-0.690786	0.469135	-1.47247	0.140895	0.492171
SMARCC1	4.01804	-0.703343	0.477234	-1.47379	0.140538	0.492171
CLTA	3.90725	0.859579	0.577298	1.48897	0.136496	0.492171
ACVR2A	3.95836	-0.641908	0.43604	-1.47213	0.140986	0.492171
SSMEM1	3.84288	0.806353	0.546564	1.47531	0.140128	0.492171
PCBP2	13.0622	-0.515465	0.351584	-1.46612	0.142615	0.494747
ZNF568	4.82897	0.760228	0.522427	1.45518	0.145618	0.502033
SLC38A2	6.93643	0.727215	0.499526	1.45581	0.145445	0.502033
NUTF2	4.18048	-0.717937	0.493753	-1.45404	0.145935	0.502033
DCX	4.33176	-0.627492	0.432935	-1.44939	0.147228	0.505075
DAOA	15.9862	-0.462327	0.319946	-1.44502	0.148453	0.507867
ITPRID2	20.6373	-0.441921	0.306559	-1.44155	0.149429	0.509792
ZFAND3	4.10423	-0.645596	0.450018	-1.4346	0.151401	0.515097
DES	6.1875	0.692425	0.483935	1.43082	0.152481	0.51732
ANXA5	6.78573	-0.645071	0.451291	-1.42939	0.152892	0.51732
YWHAE	7.95177	0.661296	0.4642	1.42459	0.154275	0.520573
TRAF3IP1	5.2526	0.676243	0.476075	1.42046	0.155475	0.523192
CDK16	4.19914	-0.684598	0.482892	-1.4177	0.156277	0.524462
RPL6	19.2468	-0.51303	0.363786	-1.41025	0.158465	0.524883
NCK1	4.17939	0.679495	0.481636	1.41081	0.158301	0.524883
COL6A3	14.1071	-0.497942	0.35244	-1.41284	0.157702	0.524883
TPPP3	4.32765	-0.773184	0.546155	-1.41568	0.156868	0.524883
RELL1	4.2386	0.743239	0.527105	1.41004	0.158527	0.524883
ZNF714	10.3637	-0.543165	0.386004	-1.40715	0.159384	0.526307
RPS15	12.6812	0.879744	0.628599	1.39953	0.161654	0.528475
PNLIPRP3	6.30834	0.678494	0.484914	1.3992	0.161752	0.528475
RAB28	5.86471	-0.580237	0.41432	-1.40046	0.161376	0.528475
PCOLCE	5.14141	0.834949	0.595152	1.40292	0.160642	0.528475
PCBP4	3.98422	-0.6978	0.499847	-1.39603	0.162706	0.53019
RPL37A	26.6043	-0.540899	0.39358	-1.37431	0.169347	0.533394
SERBP1	10.1861	-0.55393	0.401626	-1.37922	0.167828	0.533394
TLE5	7.40944	-0.604241	0.435135	-1.38863	0.164946	0.533394
ARL2	7.1598	-0.529551	0.38176	-1.38713	0.165402	0.533394
EVL	9.68643	0.530877	0.385371	1.37757	0.168335	0.533394
COL13A1	7.06067	-0.522327	0.376077	-1.38888	0.164868	0.533394
ENAH	4.72139	-0.616055	0.447605	-1.37634	0.168718	0.533394
DDX39B	5.44882	-0.561932	0.408103	-1.37694	0.168532	0.533394
ASPH	4.86459	-0.554947	0.403705	-1.37463	0.169245	0.533394
EIF3K	4.56229	-0.674543	0.486837	-1.38556	0.165881	0.533394
ZNF146	3.92985	-0.694181	0.503028	-1.38	0.167585	0.533394
TEAD2	5.12009	0.740471	0.536738	1.37958	0.167717	0.533394
AEBP1	5.67434	-0.69729	0.504889	-1.38108	0.167256	0.533394
ANTXR1	4.03186	-0.649212	0.472824	-1.37305	0.169736	0.533394
NACA	13.2695	-0.573199	0.418489	-1.36969	0.170785	0.534669
THEM5	14.0277	-0.46338	0.338583	-1.36859	0.171128	0.534669
SF1	3.99343	0.734218	0.53687	1.36759	0.17144	0.534669
H1-2	5.06694	-0.686972	0.504946	-1.36049	0.173676	0.540275
HNRNPA2B1	21.7059	-0.439567	0.32449	-1.35464	0.175533	0.542465
PFDN5	6.20773	0.618163	0.456968	1.35275	0.176136	0.542465
NBPF12	6.79534	-0.560561	0.413546	-1.3555	0.175259	0.542465
POLR2J	5.94987	-0.577748	0.427088	-1.35276	0.176132	0.542465
CHD4	7.01246	-0.530074	0.393463	-1.3472	0.177915	0.545674
FADS1	4.98811	-0.64487	0.478836	-1.34675	0.178062	0.545674
PRKACA	4.21148	0.729025	0.544814	1.33812	0.180858	0.55287
TNFAIP8	10.637	0.450036	0.33741	1.33379	0.182271	0.553084
EEF1D	7.1342	0.649665	0.486641	1.335	0.181877	0.553084
RGS3	4.1198	-0.638731	0.478845	-1.3339	0.182237	0.553084
AK1	4.47955	0.701032	0.529373	1.32427	0.185414	0.56124
FTH1	19.2852	0.512845	0.390937	1.31184	0.189576	0.562025
TRIM17	13.6068	-0.509174	0.389937	-1.30578	0.191626	0.562025
BIRC5	15.63	-0.441151	0.336976	-1.30915	0.190485	0.562025
BMERB1	9.51966	0.722736	0.549771	1.31461	0.18864	0.562025
ZNF417	11.1988	-0.477763	0.363358	-1.31485	0.188559	0.562025
SPTAN1	7.21722	-0.560464	0.426536	-1.31399	0.188849	0.562025
HSPA9	5.04528	0.626667	0.479554	1.30677	0.19129	0.562025
ZNF500	6.07532	-0.54382	0.416862	-1.30456	0.192044	0.562025
ITGB1	5.9015	-0.55962	0.428729	-1.3053	0.191791	0.562025
KANK3	5.87	-0.55818	0.42363	-1.31761	0.187633	0.562025
TRIM45	4.56384	-0.555928	0.423648	-1.31224	0.189439	0.562025
MAP3K13	4.9191	-0.524769	0.398408	-1.31717	0.187783	0.562025
TFG	4.46524	-0.665224	0.508984	-1.30696	0.191226	0.562025
HOXD4	4.77019	0.756868	0.57555	1.31504	0.188498	0.562025
PFKL	4.24385	-0.685673	0.527518	-1.29981	0.193666	0.565431
CSNK1D	5.07709	-0.577944	0.445558	-1.29712	0.194589	0.566785
FBXO15	15.4874	0.542585	0.420702	1.28971	0.19715	0.570212
RACK1	10.0564	-0.553672	0.429296	-1.28972	0.197148	0.570212
COL4A2	6.73204	-0.598799	0.463396	-1.2922	0.196288	0.570212
ALDH3B2	4.39638	0.745944	0.581053	1.28378	0.199219	0.574849
ZHX3	7.56512	-0.448278	0.351001	-1.27714	0.201551	0.576195
MYOD1	3.81567	-0.589844	0.461451	-1.27824	0.201166	0.576195
PPP6R1	4.40521	0.668831	0.523058	1.27869	0.201005	0.576195
ZIC3	4.19982	0.697332	0.544962	1.2796	0.200687	0.576195
COL1A1	82.4396	-0.419625	0.329037	-1.27531	0.202198	0.576708
HNRNPDL	11.0067	-0.515815	0.405201	-1.27298	0.203024	0.577484
CD81	5.43836	-0.650797	0.51167	-1.27191	0.203405	0.577484
MED19	5.55522	-0.493534	0.388588	-1.27007	0.20406	0.578013
NCL	7.24293	-0.586306	0.462789	-1.2669	0.205192	0.578963
FKBP3	3.86674	-0.595682	0.470335	-1.2665	0.205333	0.578963
CSPG4	5.42201	0.673277	0.532874	1.26348	0.206416	0.579372
ZNF528	5.97979	-0.500375	0.395678	-1.2646	0.206014	0.579372
EIF2S3	3.88921	-0.638948	0.506416	-1.26171	0.207055	0.579847
THY1	7.08327	-0.713346	0.567012	-1.25808	0.208363	0.582191
RPL23	7.10153	0.791284	0.629882	1.25624	0.209029	0.582732
CSRNP2	4.36492	0.62021	0.494521	1.25416	0.209782	0.583516
NHLH2	31.4276	-0.35623	0.285964	-1.24572	0.212869	0.587564
TMSB10	27.4251	0.492346	0.396337	1.24224	0.214148	0.587564
C12orf57	6.81559	0.474887	0.382025	1.24308	0.213839	0.587564
CAPNS1	8.38561	0.559934	0.451791	1.23937	0.21521	0.587564
BICD1	3.98786	-0.557258	0.449628	-1.23938	0.215206	0.587564
LDHC	4.02192	0.72309	0.584387	1.23735	0.215958	0.587564
PTOV1	5.3979	0.674069	0.544813	1.23725	0.215995	0.587564
AKR1A1	4.16579	-0.557539	0.449209	-1.24116	0.214548	0.587564
UBE2V2	3.92249	-0.596029	0.479311	-1.24351	0.213679	0.587564
PSMB2	4.11252	-0.698427	0.563963	-1.23843	0.215558	0.587564
LGALS1	17.1617	-0.533556	0.432448	-1.2338	0.217276	0.58975
TET3	50.9987	-0.37105	0.301308	-1.23146	0.218149	0.590533
PHC2	7.79139	-0.443655	0.361103	-1.22861	0.219217	0.590533
SERPINH1	4.68217	-0.575277	0.468497	-1.22792	0.219477	0.590533
H1-0	4.25847	-0.563142	0.457694	-1.23039	0.218551	0.590533
MYL9	25.3741	0.411656	0.335744	1.2261	0.22016	0.591082
CCDC47	18.2536	-0.405992	0.332663	-1.22043	0.222301	0.595046
ZNF548	4.55383	0.591667	0.485115	1.21964	0.2226	0.595046
G3BP1	4.8603	-0.561175	0.461586	-1.21575	0.224079	0.597706
LDHAL6A	5.63238	0.511832	0.42269	1.21089	0.225937	0.598758
CCT6A	4.89566	0.693716	0.573111	1.21044	0.226111	0.598758
GNB2	6.3373	-0.655944	0.540943	-1.2126	0.225285	0.598758
FCGRT	3.94503	0.58998	0.487727	1.20965	0.226413	0.598758
TAF6	4.64585	-0.586355	0.486095	-1.20626	0.227719	0.600925
ANXA1	6.63342	0.723151	0.602	1.20125	0.229655	0.604302
CUX1	4.106	-0.54836	0.456808	-1.20042	0.229977	0.604302
PNISR	5.06605	-0.523609	0.439508	-1.19135	0.233516	0.611782
NUDC	3.80108	-0.593786	0.498733	-1.19059	0.233815	0.611782
DCLK3	4.02066	0.595721	0.501576	1.1877	0.234952	0.612165
RPS9	6.52418	-0.545373	0.458703	-1.18895	0.234461	0.612165
ZNF346	7.81547	0.54403	0.459151	1.18486	0.236073	0.613012
RBP1	4.38872	-0.585976	0.494762	-1.18436	0.23627	0.613012
CARD9	8.77413	-0.502369	0.425424	-1.18087	0.237656	0.614028
RPLP0	5.61241	-0.696631	0.589594	-1.18154	0.237386	0.614028
NES	8.07037	-0.458877	0.389453	-1.17826	0.238693	0.61542
ARHGAP26	5.69115	-0.507307	0.431538	-1.17558	0.239763	0.61689
ADAR	4.16804	-0.580822	0.495014	-1.17335	0.240657	0.617904
ANKRD10	3.82306	-0.661725	0.564662	-1.1719	0.241239	0.618112
EIF3C	9.16454	-0.490823	0.420169	-1.16815	0.242744	0.620681
ZFP1	7.9319	0.450357	0.386647	1.16477	0.24411	0.6216
HMGA1	4.57668	-0.718524	0.61631	-1.16585	0.243676	0.6216
TNNC1	7.15107	-0.546963	0.4707	-1.16202	0.245227	0.62316
PSMG3	8.87055	-0.407996	0.352744	-1.15663	0.247423	0.624881
YBX1	7.95983	0.693048	0.598372	1.15822	0.246774	0.624881
MBD3	4.26432	-0.543607	0.469763	-1.15719	0.247193	0.624881
PAFAH1B2	5.40598	-0.562108	0.486986	-1.15426	0.248395	0.626056
RNF208	5.03507	0.747921	0.649354	1.15179	0.249406	0.627325
RPS17	16.969	-0.502766	0.439198	-1.14474	0.252318	0.63336
POLR2E	14.4675	-0.387303	0.341625	-1.13371	0.256918	0.636595
NME2	8.30825	-0.517748	0.454509	-1.13914	0.254646	0.636595
GIT2	6.72822	-0.458159	0.404906	-1.13152	0.257836	0.636595
SAAL1	6.81524	-0.444102	0.392633	-1.13109	0.258018	0.636595
MAT2A	6.0517	0.472344	0.417164	1.13227	0.25752	0.636595
HMGN1	6.63746	-0.508765	0.449832	-1.13101	0.25805	0.636595
SRCAP	4.79639	0.565291	0.498489	1.13401	0.256791	0.636595
LCE3A	4.59621	0.595125	0.526405	1.13055	0.258246	0.636595
TAGLN3	5.32128	-0.585243	0.514801	-1.13683	0.255608	0.636595
SYTL5	3.89227	-0.533539	0.474561	-1.12428	0.260894	0.64184
FAM47B	4.26092	-0.510207	0.456485	-1.11769	0.263701	0.647458
TESC	12.0741	-0.366734	0.329913	-1.11161	0.266307	0.649132
SEPTIN7	4.79642	-0.490497	0.441323	-1.11142	0.266386	0.649132
SEC61G	4.01688	0.736142	0.661742	1.11243	0.265953	0.649132
GXYLT2	5.56307	-0.532472	0.47919	-1.11119	0.266486	0.649132
NPIPA1	8.58431	-0.426428	0.38502	-1.10755	0.268056	0.651672
CBX5	6.24915	-0.487217	0.441873	-1.10262	0.270193	0.655577
ARF5	4.51706	0.541687	0.492108	1.10075	0.271006	0.656259
IGHMBP2	25.9108	-0.375901	0.343057	-1.09574	0.273194	0.657982
SLFNL1	7.45688	-0.42816	0.390247	-1.09715	0.272575	0.657982
HSPG2	4.83434	-0.486656	0.445008	-1.09359	0.274136	0.657982
TLN1	4.6645	-0.517026	0.472244	-1.09483	0.273591	0.657982
JUND	4.19773	0.662158	0.605801	1.09303	0.274381	0.657982
COL5A1	20.7143	-0.340033	0.314196	-1.08223	0.279148	0.663574
B2M	9.03961	0.433473	0.402989	1.07565	0.282086	0.663574
KCNH3	8.80997	-0.399281	0.369202	-1.08147	0.279488	0.663574
NAP1L1	11.195	-0.409911	0.380724	-1.07666	0.281631	0.663574
SELENOW	4.77663	-0.495028	0.458458	-1.07977	0.280246	0.663574
HDLBP	7.01384	-0.474312	0.439993	-1.078	0.281035	0.663574
RUNX3	5.81463	0.503224	0.463362	1.08603	0.277467	0.663574
FLNA	7.5674	-0.467758	0.43342	-1.07922	0.280488	0.663574
H2BC8	6.73944	-0.557075	0.515443	-1.08077	0.279799	0.663574
CDPF1	3.87075	-0.598459	0.552548	-1.08309	0.278769	0.663574
UBE2Z	24.3376	-0.396208	0.36906	-1.07356	0.283019	0.664391
SNRPA	3.80993	-0.493655	0.460298	-1.07247	0.283509	0.664391
MYBPC2	14.7455	-0.377083	0.353465	-1.06682	0.286053	0.666353
EBI3	10.6743	-0.495825	0.464333	-1.06782	0.285601	0.666353
ARGLU1	4.56617	0.578634	0.5429	1.06582	0.286505	0.666353
ZNF529	4.39676	-0.500873	0.468639	-1.06878	0.285168	0.666353
RPL34	16.1299	-0.350976	0.329754	-1.06436	0.287168	0.666639
SMIM40	8.41052	-0.357998	0.338079	-1.05892	0.289638	0.671111
RTN4	11.2002	-0.364313	0.345978	-1.053	0.292342	0.674824
AHNAK	10.113	0.409767	0.39046	1.04945	0.293972	0.674824
NBPF19	5.52108	-0.444528	0.42346	-1.04975	0.293832	0.674824
HS6ST2	3.88394	-0.497915	0.47399	-1.05048	0.293499	0.674824
PKDCC	4.123	-0.538684	0.511418	-1.05331	0.292197	0.674824
NDUFS5	4.07776	0.651712	0.622082	1.04763	0.294808	0.675489
ZNF574	7.51007	-0.428734	0.409856	-1.04606	0.295533	0.675896
QARS1	5.53075	-0.50736	0.486416	-1.04306	0.296922	0.677816
PAOX	4.01404	-0.491757	0.474178	-1.03707	0.299702	0.682901
TNNC2	12.9939	0.384761	0.37153	1.03561	0.300382	0.68319
TCEAL9	4.7519	-0.521698	0.504681	-1.03372	0.301267	0.683943
PLOD1	6.97426	0.497912	0.482464	1.03202	0.302063	0.684492
PDCD6	4.27884	-0.50962	0.495815	-1.02784	0.304024	0.687673
BASP1	15.6859	-0.351709	0.3436	-1.0236	0.306024	0.68977
EPN1	4.23799	0.572926	0.559767	1.02351	0.306068	0.68977
PEG10	7.79651	-0.462756	0.453236	-1.021	0.307253	0.691179
SLC39A3	5.20998	-0.413888	0.406974	-1.01699	0.309159	0.694203
CTNNA1	5.17639	-0.46809	0.462079	-1.01301	0.311055	0.694686
GRINA	3.83897	0.503906	0.49671	1.01449	0.31035	0.694686
MUC21	4.48753	-0.478345	0.472208	-1.013	0.311062	0.694686
GANAB	4.52453	-0.499623	0.494129	-1.01112	0.31196	0.695434
H3-3B	5.63473	-0.429082	0.424949	-1.00972	0.312627	0.695666
CALM3	6.21055	-0.428159	0.425436	-1.0064	0.314223	0.697331
BCL2L11	3.98544	0.570991	0.568317	1.0047	0.315039	0.697331
H2AZ1	4.27547	0.541464	0.538962	1.00464	0.315069	0.697331
IL24	41.3639	-0.289252	0.289638	-0.998666	0.317957	0.698712
ACAA1	5.38759	-0.422752	0.422531	-1.00052	0.317058	0.698712
ZNF37A	6.70903	-0.400332	0.400439	-0.999734	0.317439	0.698712
DZIP1L	5.26177	0.433552	0.433941	0.999103	0.317745	0.698712
HSP90AB1	11.939	-0.342734	0.344235	-0.99564	0.319425	0.700692
ACO2	4.13972	0.48187	0.48523	0.993074	0.320674	0.701942
EMC10	5.3276	-0.45401	0.458147	-0.990971	0.3217	0.701942
LRIG1	3.98071	-0.432986	0.436563	-0.991805	0.321292	0.701942
EWSR1	7.91808	-0.346334	0.350325	-0.988607	0.322855	0.703221
S100A4	4.12493	-0.532459	0.539724	-0.986539	0.323869	0.704187
EIF4A1	8.2609	-0.377708	0.383424	-0.985091	0.324579	0.704491
ELK1	18.217	-0.363908	0.371554	-0.979422	0.327371	0.705253
VAMP8	11.5027	-0.349405	0.35656	-0.979935	0.327118	0.705253
CLTB	11.3731	0.502884	0.517486	0.971782	0.331159	0.705253
SFPQ	9.77503	0.376698	0.38646	0.97474	0.329689	0.705253
GNA15	7.38198	-0.411736	0.420393	-0.979408	0.327378	0.705253
WNT9A	5.19095	-0.405079	0.415868	-0.974057	0.330028	0.705253
MAPRE1	4.41402	-0.488866	0.501178	-0.975433	0.329346	0.705253
GJC3	4.3323	0.526044	0.540557	0.973152	0.330478	0.705253
TUBAL3	3.96852	0.60883	0.626577	0.971676	0.331212	0.705253
AVEN	4.00271	-0.453699	0.463776	-0.978272	0.32794	0.705253
MRPL4	3.84029	0.643102	0.657849	0.977584	0.32828	0.705253
XRCC2	40.5571	-0.261256	0.27013	-0.967151	0.333469	0.708836
EIF3A	26.4621	-0.31234	0.324094	-0.963733	0.33518	0.711249
SPG7	7.47175	0.437802	0.456429	0.95919	0.337463	0.713546
WNT10A	6.80582	-0.418733	0.43703	-0.958133	0.337996	0.713546
CNPY2	4.93354	-0.429627	0.447984	-0.959022	0.337548	0.713546
CCT5	4.12405	-0.44194	0.462732	-0.955068	0.339544	0.71488
PBX2	4.16746	-0.500733	0.524553	-0.95459	0.339785	0.71488
C16orf78	8.51843	-0.365973	0.386068	-0.94795	0.343155	0.719597
STK25	7.35926	-0.404573	0.426821	-0.947876	0.343193	0.719597
MYL1	17.5207	0.346336	0.368791	0.93911	0.347674	0.719747
SRL	5.69294	0.405714	0.428719	0.946339	0.343976	0.719747
ITM2B	9.32824	0.347558	0.381572	0.910859	0.36237	0.719747
RPL18	15.8254	0.442151	0.473529	0.933736	0.35044	0.719747
DBN1	6.99852	-0.412715	0.450999	-0.915112	0.360133	0.719747
RPLP2	11.0551	0.449921	0.48903	0.920027	0.357558	0.719747
RPL13	11.1804	-0.423046	0.461697	-0.916285	0.359518	0.719747
SFRP4	6.48443	-0.373032	0.409589	-0.910747	0.362429	0.719747
EIF4H	6.79041	0.462177	0.503258	0.91837	0.358425	0.719747
HMX1	7.26695	0.423216	0.449005	0.942564	0.345904	0.719747
ATRX	7.61475	-0.347882	0.375217	-0.92715	0.353849	0.719747
TNFRSF10C	6.54285	-0.348876	0.380243	-0.917508	0.358877	0.719747
DHRS1	5.68892	0.446712	0.490267	0.911161	0.362211	0.719747
SLC25A19	11.843	0.360041	0.395294	0.910818	0.362391	0.719747
TRIP12	5.33211	0.45234	0.487961	0.927	0.353927	0.719747
KIAA1614	5.41494	-0.394496	0.429158	-0.919232	0.357974	0.719747
SPANXA1	4.8587	-0.428235	0.455108	-0.940953	0.346729	0.719747
NBPF14	6.82622	-0.359701	0.389779	-0.922833	0.356094	0.719747
PRMT2	4.3356	-0.441361	0.483382	-0.913069	0.361206	0.719747
SF3B1	5.37868	-0.409386	0.435242	-0.940594	0.346913	0.719747
GLIS2	5.62098	0.456267	0.486307	0.938229	0.348127	0.719747
VASH2	4.2659	-0.455487	0.500186	-0.910634	0.362488	0.719747
RBM39	4.28287	-0.458025	0.49156	-0.931778	0.351451	0.719747
YBX3	3.8332	-0.548843	0.592632	-0.92611	0.354389	0.719747
ABITRAM	4.42093	0.501117	0.549261	0.912348	0.361585	0.719747
CCNY	4.26642	-0.502162	0.536233	-0.936462	0.349035	0.719747
FGFR1OP2	3.89843	-0.460763	0.499833	-0.921834	0.356615	0.719747
EMILIN1	4.54306	-0.398653	0.436426	-0.913448	0.361007	0.719747
SEPTIN8	4.38885	-0.436132	0.470407	-0.927138	0.353855	0.719747
TIMP2	3.84712	-0.4716	0.51789	-0.910619	0.362496	0.719747
YJEFN3	3.94652	0.494225	0.530971	0.930794	0.35196	0.719747
BCL9L	3.98885	-0.494983	0.526676	-0.939824	0.347308	0.719747
MSC	4.94655	-0.563311	0.596516	-0.944335	0.344999	0.719747
ZNF343	4.05058	-0.40995	0.45184	-0.907289	0.364254	0.719806
COA4	3.90748	-0.429834	0.473777	-0.907251	0.364274	0.719806
CDK4	3.83113	-0.549994	0.604758	-0.909445	0.363115	0.719806
HNRNPA3	9.31669	-0.362313	0.399948	-0.905902	0.364988	0.720064
ALDOA	27.5948	0.307369	0.34332	0.895285	0.370635	0.72454
LMNA	8.42403	0.426331	0.473779	0.899853	0.368198	0.72454
ATP1B1	5.74035	0.385301	0.432473	0.890924	0.37297	0.72454
UBA52	7.31442	0.449976	0.50585	0.889545	0.37371	0.72454
LAMC1	8.27504	-0.379304	0.42237	-0.898038	0.369165	0.72454
PSMD1	5.71232	-0.396275	0.443758	-0.892998	0.371858	0.72454
VSIG10	4.32863	-0.457122	0.510487	-0.895463	0.37054	0.72454
TCF4	3.83084	-0.467994	0.524557	-0.89217	0.372302	0.72454
PTK7	4.6557	0.483359	0.542871	0.890377	0.373264	0.72454
ZC3H13	4.07222	-0.429361	0.477912	-0.898411	0.368967	0.72454
PLAGL1	3.8306	-0.456801	0.512874	-0.890668	0.373107	0.72454
FLNC	6.95925	-0.369063	0.417925	-0.883084	0.377191	0.725384
DVL1	12.5254	-0.291878	0.329673	-0.885358	0.375964	0.725384
PNN	10.8557	-0.333987	0.379519	-0.880028	0.378844	0.725384
GRIN2A	5.48386	-0.373159	0.423426	-0.881286	0.378163	0.725384
SEC62	5.93188	-0.374742	0.42408	-0.883659	0.37688	0.725384
TXNIP	5.46056	-0.416088	0.469546	-0.886149	0.375537	0.725384
FKBP9	4.42004	-0.397256	0.451209	-0.880427	0.378628	0.725384
MLXIP	4.3071	-0.438686	0.497812	-0.881228	0.378194	0.725384
CDK2AP1	5.93619	-0.425393	0.484388	-0.878207	0.379832	0.726149
NREP	8.00684	-0.381483	0.435243	-0.876481	0.380769	0.726815
MARCKSL1	9.99256	-0.386882	0.442441	-0.874428	0.381885	0.727822
RNF181	4.58193	-0.473446	0.545345	-0.868158	0.385308	0.732419
MAVS	3.841	-0.411877	0.474603	-0.867837	0.385484	0.732419
TGFBI	10.3778	-0.416006	0.481067	-0.864758	0.387172	0.73337
SLC39A7	4.1623	-0.389095	0.449402	-0.865806	0.386596	0.73337
CYP2A6	9.05372	0.338066	0.392622	0.861046	0.389212	0.736106
MEST	12.8523	0.397643	0.463252	0.858372	0.390687	0.736187
ZNF684	7.62216	-0.344283	0.40139	-0.857727	0.391043	0.736187
DIO3	4.00237	-0.420454	0.489351	-0.859208	0.390226	0.736187
ITGAV	4.76794	-0.394551	0.46133	-0.855247	0.392414	0.737643
ARF1	5.54663	-0.368736	0.432072	-0.853415	0.393429	0.738427
ANKRD36B	28.2958	-0.261211	0.311301	-0.839095	0.401416	0.740003
QKI	8.35944	0.364395	0.432135	0.843243	0.399092	0.740003
RPS28	16.1402	-0.331627	0.396219	-0.83698	0.402604	0.740003
SPTBN1	6.35446	0.365302	0.431178	0.847218	0.396874	0.740003
RPS18	7.86669	-0.388397	0.46299	-0.838888	0.401532	0.740003
TM7SF3	5.79209	-0.362382	0.430059	-0.842633	0.399434	0.740003
ADAM19	4.41502	-0.396911	0.474272	-0.836885	0.402657	0.740003
BCLAF1	4.9866	0.44547	0.53153	0.83809	0.40198	0.740003
BRK1	5.87327	0.42893	0.512174	0.837469	0.402329	0.740003
MKNK2	3.97746	0.440845	0.5265	0.837312	0.402417	0.740003
BAGE5	4.3051	-0.371171	0.440415	-0.842775	0.399354	0.740003
CCNL2	4.65157	-0.38148	0.454755	-0.83887	0.401542	0.740003
CARM1	4.28552	0.467716	0.558625	0.837263	0.402445	0.740003
LMAN1	4.32976	0.529569	0.623104	0.849889	0.395387	0.740003
PRRC2B	7.69621	-0.326328	0.390876	-0.834863	0.403795	0.740991
PRELID3B	15.7455	-0.255637	0.307703	-0.830794	0.40609	0.741778
UPK3BL1	7.69247	0.37686	0.453498	0.831007	0.40597	0.741778
HNRNPK	7.25246	-0.377207	0.453432	-0.831894	0.405469	0.741778
ARL6IP4	4.66369	-0.436395	0.525875	-0.829845	0.406627	0.741778
NDUFV2	5.57347	-0.345978	0.420896	-0.822003	0.411075	0.747685
SRSF6	4.78669	-0.370538	0.450603	-0.822316	0.410897	0.747685
CYCS	4.70801	0.378285	0.4608	0.820933	0.411685	0.747692
H4C12	5.35486	0.520229	0.635373	0.818777	0.412914	0.748823
EIF1	5.91439	-0.388661	0.475742	-0.816958	0.413952	0.749606
LRRC27	4.97405	0.515393	0.633055	0.814136	0.415567	0.751428
EIF4G2	12.7004	-0.288178	0.356211	-0.809008	0.41851	0.755644
MYLPF	11.7963	-0.271363	0.336755	-0.805819	0.420348	0.757853
AK8	21.9582	0.330705	0.412725	0.801272	0.422974	0.757861
COL6A2	8.91739	-0.309512	0.384629	-0.804703	0.420991	0.757861
MYOT	4.79532	0.385582	0.481534	0.800736	0.423285	0.757861
SKP1	7.67387	0.335078	0.418585	0.800502	0.42342	0.757861
CHMP3	5.17802	0.386056	0.481931	0.80106	0.423097	0.757861
RPL37	14.1114	-0.362912	0.45433	-0.798785	0.424415	0.758274
ACTN4	6.77159	0.360638	0.452535	0.796927	0.425493	0.758274
ENGASE	3.83578	0.486657	0.610589	0.797028	0.425435	0.758274
ZNF383	30.0252	-0.226335	0.285272	-0.793401	0.427544	0.759433
RPL12	9.84631	-0.383895	0.483615	-0.793803	0.42731	0.759433
STX5	4.71839	-0.385347	0.486157	-0.792639	0.427988	0.759433
SS18	4.81627	-0.357311	0.452941	-0.788867	0.43019	0.761995
POLR2L	3.97497	-0.393393	0.499196	-0.788053	0.430666	0.761995
RPL27A	18.2201	-0.315732	0.404017	-0.781481	0.434519	0.76444
IGFBP2	5.02396	0.349749	0.448758	0.77937	0.435762	0.76444
SH3YL1	3.8467	0.415458	0.531015	0.782385	0.433988	0.76444
TOMM20	3.88513	-0.400991	0.513451	-0.780972	0.434819	0.76444
RRBP1	3.80089	0.431216	0.552978	0.779807	0.435504	0.76444
P3H1	4.06966	-0.404685	0.517329	-0.78226	0.434062	0.76444
TMSB4X	28.1046	-0.299541	0.38572	-0.776577	0.437409	0.765249
SRP14	3.99412	0.487247	0.627502	0.776485	0.437462	0.765249
CYS1	3.95943	-0.382309	0.494861	-0.772559	0.439783	0.767136
OGFR	4.42038	0.454275	0.587589	0.773117	0.439453	0.767136
PRELID2	3.84395	0.484811	0.632016	0.767087	0.44303	0.771709
MYH9	16.781	0.294641	0.384756	0.765787	0.443803	0.771967
RPL24	8.09196	-0.352968	0.461717	-0.764469	0.444588	0.772245
SOX4	7.14863	0.330156	0.43525	0.758544	0.448125	0.775236
SLC35D1	4.416	0.340737	0.449265	0.75843	0.448193	0.775236
COX8A	3.90146	0.403561	0.531827	0.75882	0.44796	0.775236
NFYA	185.545	-0.202372	0.268521	-0.753655	0.451057	0.779098
FHL1	7.70771	0.311409	0.414416	0.751439	0.452388	0.780307
SP7	16.4434	-0.329511	0.440444	-0.748133	0.45438	0.781558
OR11H6	4.41382	0.354348	0.473062	0.749051	0.453826	0.781558
MAGED2	7.1497	-0.301771	0.407477	-0.740582	0.458947	0.781998
LDHA	6.84126	0.411506	0.558949	0.736215	0.4616	0.781998
RCC2	6.85433	-0.343975	0.466509	-0.73734	0.460916	0.781998
ANXA11	3.90121	0.383383	0.518817	0.738955	0.459934	0.781998
IDH2	3.91239	0.395209	0.53593	0.737427	0.460863	0.781998
SH3D21	5.17009	0.370033	0.498463	0.742349	0.457876	0.781998
WIPI1	3.89571	0.383711	0.519751	0.738259	0.460357	0.781998
SRSF3	4.39379	-0.372812	0.503629	-0.740251	0.459148	0.781998
FAM20C	5.17811	-0.314875	0.425281	-0.740393	0.459061	0.781998
U2AF2	4.33998	-0.334908	0.454423	-0.736996	0.461125	0.781998
PFN2	4.15559	-0.435134	0.59006	-0.73744	0.460855	0.781998
MYBPH	8.65919	-0.264212	0.360658	-0.732584	0.463812	0.782525
CCDC86	7.18214	0.339631	0.463542	0.732686	0.46375	0.782525
KDM5C	3.87889	-0.366504	0.499599	-0.733596	0.463195	0.782525
RAB19	3.8053	-0.365377	0.499838	-0.730991	0.464785	0.783095
PABPC1	7.30224	-0.353638	0.486054	-0.727569	0.466877	0.783166
ACTR10	4.84746	-0.338825	0.465316	-0.728162	0.466514	0.783166
ZBTB12	4.53181	0.397553	0.547008	0.726776	0.467363	0.783166
ERH	3.88467	-0.374713	0.513469	-0.729767	0.465533	0.783166
IGFBP4	7.07834	0.321919	0.443961	0.725107	0.468386	0.783817
MLIP	5.24794	-0.318951	0.443732	-0.718792	0.472269	0.784897
TCF12	6.31159	-0.343674	0.476346	-0.721479	0.470615	0.784897
MEGF10	4.16283	-0.343851	0.478851	-0.718075	0.472711	0.784897
RASA3	5.10903	-0.338974	0.470083	-0.721094	0.470852	0.784897
EGFL7	4.54766	-0.342057	0.476497	-0.717858	0.472845	0.784897
DHRS2	4.12028	0.38205	0.530371	0.720345	0.471313	0.784897
KHSRP	4.01604	-0.351626	0.490767	-0.716483	0.473693	0.78525
SOX9	7.30334	-0.296201	0.417997	-0.70862	0.47856	0.787222
MLLT3	5.15666	-0.294183	0.412476	-0.713213	0.475714	0.787222
CORO1C	4.95063	-0.345603	0.48726	-0.709279	0.478151	0.787222
CHTOP	4.13862	-0.344313	0.486055	-0.708383	0.478708	0.787222
DUS1L	4.06714	-0.330125	0.46482	-0.710222	0.477567	0.787222
VAT1	3.99371	-0.393092	0.552469	-0.711519	0.476763	0.787222
CDKN1A	4.83655	-0.320128	0.45505	-0.703501	0.481743	0.788017
CD164	4.01799	-0.369801	0.525384	-0.703869	0.481514	0.788017
LMF2	4.38529	-0.340307	0.483262	-0.704187	0.481316	0.788017
VKORC1	4.03686	-0.410445	0.583175	-0.703811	0.481551	0.788017
GABARAP	6.85744	-0.346714	0.500379	-0.692902	0.488371	0.797234
XKR4	4.44026	-0.300716	0.434938	-0.691399	0.489315	0.797234
ARFGAP1	3.80491	-0.353047	0.510557	-0.691494	0.489255	0.797234
TTC31	9.05465	0.311471	0.452206	0.688782	0.490961	0.79883
AP2M1	4.9848	-0.359935	0.523324	-0.687786	0.491587	0.79883
PTTG1IP	4.10126	-0.349792	0.50988	-0.686028	0.492696	0.799578
BCL2L2	11.1208	-0.268408	0.393177	-0.682665	0.494819	0.80197
RPS2	18.1229	-0.319922	0.469456	-0.681474	0.495572	0.802137
RPL21	11.4895	-0.322471	0.475019	-0.678859	0.497227	0.803764
ZNF334	7.19511	-0.267977	0.395778	-0.677091	0.498348	0.804523
SEC31A	5.31079	-0.323941	0.479337	-0.67581	0.499161	0.804784
RAB39A	5.73177	-0.293739	0.435492	-0.6745	0.499994	0.805074
ARHGDIA	5.87882	-0.289695	0.431028	-0.672103	0.501518	0.806478
MYOG	6.27617	-0.295869	0.445271	-0.66447	0.50639	0.806578
NEB	4.67318	0.31091	0.470533	0.660763	0.508765	0.806578
DNM2	6.04413	-0.272516	0.412311	-0.660948	0.508645	0.806578
NFE2L1	5.39228	-0.327383	0.488685	-0.669926	0.502905	0.806578
INTS6L	9.82993	0.254805	0.382764	0.665698	0.505604	0.806578
MRFAP1	6.66835	-0.277541	0.418472	-0.663224	0.507187	0.806578
PCID2	5.2129	0.340485	0.511452	0.665722	0.505589	0.806578
ITM2A	3.88903	0.300236	0.452095	0.664099	0.506627	0.806578
BNIP3L	5.15861	0.317709	0.476685	0.666495	0.505094	0.806578
CNN2	5.53325	0.361609	0.546297	0.661928	0.508017	0.806578
LASP1	4.47314	-0.336125	0.502698	-0.668641	0.503725	0.806578
OAZ1	5.83345	0.329541	0.502991	0.655163	0.512363	0.810064
SACS	4.80163	-0.305789	0.468095	-0.653263	0.513587	0.810064
CRIP1	4.79191	-0.392842	0.599874	-0.654874	0.512549	0.810064
NOP53	3.91537	0.368132	0.563107	0.653752	0.513272	0.810064
KLC1	4.04355	0.319276	0.48985	0.651783	0.514541	0.810533
CD34	5.63838	-0.286706	0.441718	-0.649071	0.516292	0.812052
BSG	3.81033	-0.339578	0.524336	-0.647635	0.517221	0.812052
RPL22L1	4.50168	0.448252	0.692562	0.647238	0.517478	0.812052
PRMT8	366.864	-0.190582	0.296095	-0.643651	0.519802	0.812158
PRKDC	4.45835	-0.283719	0.441192	-0.643075	0.520176	0.812158
SNRNP70	4.9469	-0.305827	0.473401	-0.64602	0.518266	0.812158
OST4	4.16812	-0.375013	0.58264	-0.643644	0.519806	0.812158
MRPS16	5.50419	-0.288294	0.44976	-0.640995	0.521526	0.812213
SSR1	3.975	-0.406009	0.633221	-0.641181	0.521405	0.812213
HMGB1	13.937	-0.23258	0.364465	-0.63814	0.523383	0.812284
CCNI	7.53925	-0.292875	0.459131	-0.63789	0.523545	0.812284
WWTR1	3.88337	0.318001	0.497382	0.63935	0.522596	0.812284
TSC22D1	6.36296	0.280795	0.444414	0.631833	0.527496	0.817387
TMX3	3.86526	0.345891	0.548686	0.630399	0.528433	0.817813
RAN	5.78867	-0.294426	0.467815	-0.629364	0.52911	0.817837
KIR3DL1	7.03699	0.345926	0.550636	0.62823	0.529853	0.817961
COL27A1	4.45902	0.339184	0.541675	0.626177	0.531199	0.818537
LRRC17	4.97948	0.391257	0.626383	0.624629	0.532215	0.818537
WIZ	4.10766	-0.363642	0.581247	-0.625623	0.531562	0.818537
GALNT2	4.44	-0.315813	0.509566	-0.619769	0.53541	0.822427
TMEM126B	5.15994	-0.282653	0.45684	-0.618714	0.536105	0.822471
EIF3L	5.61285	0.313148	0.509925	0.614105	0.539146	0.825087
FAHD2B	3.85136	-0.308618	0.50234	-0.614359	0.538978	0.825087
THRAP3	4.39534	-0.266866	0.436731	-0.611054	0.541164	0.827151
NUCB1	4.48316	-0.287538	0.473342	-0.607464	0.543543	0.827714
EXOSC6	4.25757	-0.280101	0.460667	-0.608035	0.543164	0.827714
SF3B3	3.85878	-0.290289	0.477397	-0.608068	0.543143	0.827714
STBD1	31.567	-0.170829	0.28706	-0.5951	0.551777	0.827843
IGFBP5	16.8756	-0.217948	0.360243	-0.605003	0.545177	0.827843
RPL38	11.7159	-0.242407	0.402348	-0.602481	0.546854	0.827843
CTTN	9.67936	-0.232781	0.38874	-0.598808	0.549301	0.827843
KIF1B	4.40015	0.287259	0.482997	0.594742	0.552016	0.827843
TDGF1	5.50935	0.269638	0.45093	0.59796	0.549867	0.827843
TOR1AIP2	5.87876	0.284552	0.470378	0.604944	0.545217	0.827843
ZKSCAN5	4.6104	0.312857	0.527359	0.593252	0.553013	0.827843
RAD23A	4.48731	0.326668	0.547078	0.597114	0.550431	0.827843
ANAPC5	4.56062	0.324419	0.544586	0.595715	0.551365	0.827843
IGF2BP2	3.86748	-0.306351	0.515946	-0.593765	0.552669	0.827843
CHKB	5.00551	-0.334807	0.559839	-0.598042	0.549812	0.827843
PKD1	3.99184	0.308755	0.512697	0.602216	0.54703	0.827843
NASP	4.51491	-0.30286	0.504356	-0.600489	0.54818	0.827843
ZFTA	3.82701	0.331558	0.5603	0.591752	0.554017	0.828343
ATAD3A	10.536	-0.21563	0.365975	-0.589195	0.555731	0.8299
H4C1	20.892	-0.195038	0.332701	-0.586226	0.557723	0.830118
ALG12	8.45378	-0.223443	0.381578	-0.585576	0.558161	0.830118
SVIL	4.05355	-0.281096	0.48135	-0.583974	0.559238	0.830118
NONO	9.47431	-0.241301	0.412939	-0.584352	0.558984	0.830118
LRRC75B	4.53498	0.328899	0.562745	0.584455	0.558914	0.830118
ZNF106	6.64026	-0.22569	0.391234	-0.576867	0.564029	0.831237
TRAK1	4.23264	-0.274246	0.473993	-0.578587	0.562868	0.831237
RPS10	5.44262	-0.335429	0.57903	-0.579294	0.562391	0.831237
CYP4Z1	4.35916	0.289334	0.499903	0.57878	0.562738	0.831237
TIMP3	4.38777	0.351708	0.608806	0.577701	0.563466	0.831237
SP3	4.69073	0.369616	0.636782	0.580443	0.561616	0.831237
ACTN3	4.50315	-0.241536	0.42166	-0.572822	0.566765	0.831577
SULT1A4	7.87892	0.235639	0.409519	0.575404	0.565018	0.831577
RNF24	4.18167	-0.279208	0.487661	-0.572544	0.566953	0.831577
H4C15	5.55485	-0.3038	0.530038	-0.573167	0.566531	0.831577
BBLN	6.30733	-0.235445	0.413347	-0.569607	0.568944	0.832519
C17orf58	4.15247	0.27493	0.482573	0.569717	0.568869	0.832519
RPL15	12.6384	-0.245659	0.434422	-0.565484	0.571744	0.834857
BLCAP	4.72865	-0.262238	0.464289	-0.564818	0.572198	0.834857
SULF2	4.65118	-0.325281	0.576462	-0.564271	0.57257	0.834857
PLEKHA4	11.2527	-0.192734	0.342432	-0.562838	0.573545	0.835293
R3HDM4	18.8015	0.192589	0.345061	0.55813	0.576755	0.838409
ATP5F1A	6.31564	-0.233733	0.419094	-0.55771	0.577043	0.838409
RPL4	20.3102	0.215976	0.388338	0.556156	0.578104	0.838769
ERF	11.6959	0.225314	0.406343	0.554491	0.579243	0.838769
ZNF625	13.2642	-0.191388	0.345238	-0.554367	0.579328	0.838769
ARHGEF2	4.91129	0.240507	0.436253	0.551302	0.581426	0.840572
ZNF354C	5.94488	-0.23391	0.424857	-0.550561	0.581935	0.840572
RPS29	5.10216	0.279606	0.509983	0.548266	0.583509	0.841862
ANXA6	7.2485	-0.217013	0.401922	-0.539938	0.58924	0.847567
CHMP6	4.6045	-0.240033	0.445234	-0.539116	0.589807	0.847567
PDE4D	5.83332	-0.223796	0.415629	-0.538453	0.590265	0.847567
PLIN5	5.32639	0.219645	0.408613	0.53754	0.590895	0.847567
GABARAPL1	3.80962	0.272171	0.505192	0.538747	0.590061	0.847567
FIZ1	9.79048	0.222771	0.41846	0.532359	0.594477	0.851716
PLEKHD1	6.0093	0.207376	0.391221	0.530073	0.596061	0.852996
ZNF140	67.201	-0.154475	0.300602	-0.513885	0.607333	0.856375
TNNI2	14.3113	0.196619	0.384739	0.511044	0.60932	0.856375
GPC1	10.6256	-0.206694	0.406174	-0.508881	0.610836	0.856375
RPL17	18.9541	-0.195327	0.382443	-0.510734	0.609537	0.856375
MAP2K7	11.2813	0.176293	0.341879	0.515659	0.606093	0.856375
SERPINF1	7.75168	-0.231232	0.449909	-0.513953	0.607285	0.856375
CNN3	5.24921	-0.214083	0.418482	-0.511571	0.608951	0.856375
H3C13	9.20845	-0.234707	0.453353	-0.517713	0.604658	0.856375
TRIM66	5.0767	-0.230599	0.441353	-0.522482	0.601335	0.856375
FSCN1	5.6924	0.256311	0.498528	0.514136	0.607157	0.856375
ARMCX3	4.25017	-0.253191	0.49764	-0.508783	0.610904	0.856375
CCS	4.40573	-0.266587	0.523436	-0.509301	0.610541	0.856375
ACADVL	4.3535	-0.2749	0.524984	-0.523635	0.600533	0.856375
SOD1	4.47188	-0.251872	0.492158	-0.51177	0.608812	0.856375
SDHC	4.12344	0.267252	0.515924	0.518007	0.604453	0.856375
ATP5PD	4.44751	-0.299583	0.570168	-0.52543	0.599285	0.856375
PRMT6	4.22905	-0.2374	0.462498	-0.513298	0.607743	0.856375
UBE2I	3.89407	-0.281931	0.553018	-0.509805	0.610188	0.856375
ENO3	4.89028	-0.23482	0.464162	-0.505902	0.612926	0.857704
NPLOC4	3.86739	-0.275481	0.547158	-0.503476	0.61463	0.857704
PJA2	3.80507	0.260341	0.516772	0.503784	0.614413	0.857704
GPR18	4.47882	-0.300782	0.596076	-0.504603	0.613838	0.857704
RPS27A	9.72879	-0.2155	0.431145	-0.499833	0.617193	0.860308
TOMM34	10.2679	-0.173324	0.3508	-0.494082	0.621248	0.863616
SYNCRIP	5.65574	-0.206278	0.416863	-0.494833	0.620718	0.863616
VSIG8	3.91403	0.27679	0.560878	0.493494	0.621664	0.863616
PLD3	8.6473	0.212519	0.43166	0.49233	0.622486	0.863787
MRPL20	4.59827	0.286373	0.58285	0.491333	0.623191	0.863794
DDRGK1	5.91873	-0.204987	0.42181	-0.48597	0.626989	0.866231
SEPHS1	4.12702	-0.211159	0.434465	-0.486021	0.626952	0.866231
PSMC1	4.39663	0.243034	0.502239	0.483902	0.628456	0.866231
EIF3B	5.05411	0.225556	0.464484	0.485606	0.627247	0.866231
EEF1B2	4.68517	0.290838	0.600617	0.484231	0.628222	0.866231
NFIX	5.00416	-0.209783	0.434825	-0.482454	0.629484	0.86668
RPL30	14.0515	0.220811	0.460026	0.479996	0.63123	0.867152
RPS15A	6.1632	0.278727	0.579938	0.480614	0.630791	0.867152
DCAF1	4.20512	-0.249832	0.52221	-0.478413	0.632356	0.867733
MYH3	37.5952	0.198349	0.415731	0.477108	0.633285	0.868044
GGA3	6.07401	0.197603	0.419698	0.470822	0.637768	0.868677
SPIN2A	5.14863	0.250234	0.526563	0.475221	0.634629	0.868677
CD82	4.17983	-0.242899	0.516044	-0.470695	0.637859	0.868677
HNRNPM	4.94904	-0.219962	0.465454	-0.472574	0.636517	0.868677
SDHA	4.64062	-0.220976	0.46962	-0.470542	0.637968	0.868677
FNBP4	3.93312	-0.225222	0.477399	-0.47177	0.637091	0.868677
LAMB1	5.28905	0.228825	0.487582	0.469305	0.638851	0.868922
STT3A	3.82321	-0.245818	0.52558	-0.467707	0.639994	0.869519
COL6A1	26.6217	-0.159007	0.342146	-0.464736	0.642121	0.870577
TEDC2	4.31532	0.222401	0.478643	0.46465	0.642182	0.870577
JMJD1C	4.90334	0.245629	0.529985	0.463464	0.643032	0.870772
SIGLEC16	9.87369	-0.177934	0.385763	-0.461252	0.644618	0.87101
HNRNPUL1	4.78768	-0.202748	0.439413	-0.461405	0.644508	0.87101
OBSL1	4.23742	0.211082	0.460012	0.458863	0.646333	0.872373
VDAC1	4.33264	0.247126	0.542792	0.455286	0.648904	0.87298
TMEM170A	4.35714	-0.218198	0.47884	-0.45568	0.64862	0.87298
CREB5	4.76947	-0.234977	0.515378	-0.455932	0.648439	0.87298
SMAD7	5.59469	-0.203343	0.448959	-0.45292	0.650607	0.873498
ARPC2	5.0693	-0.208754	0.461043	-0.452786	0.650703	0.873498
P2RX1	3.90323	-0.197377	0.438481	-0.450139	0.65261	0.875107
IFITM2	22.8136	0.129822	0.295787	0.438905	0.660731	0.881212
RPS5	9.03373	0.235239	0.532918	0.441416	0.658912	0.881212
SLC36A4	4.72169	-0.210797	0.477818	-0.441167	0.659092	0.881212
MRPS18A	4.08099	-0.211567	0.481298	-0.439576	0.660244	0.881212
ATXN10	3.84105	-0.248884	0.565607	-0.440031	0.659915	0.881212
WSB1	6.1559	0.204742	0.469367	0.436209	0.662685	0.882865
CKM	6.59718	0.175069	0.415728	0.421115	0.673671	0.884094
CKB	12.4382	-0.146926	0.34079	-0.431134	0.666371	0.884094
CRYAB	4.49904	0.182669	0.428107	0.426689	0.669606	0.884094
TPI1	10.9357	-0.174763	0.414196	-0.421933	0.673074	0.884094
MEGF8	9.15181	-0.185422	0.439463	-0.421928	0.673077	0.884094
ZFP36L1	12.8567	0.188373	0.450403	0.418233	0.675777	0.884094
RPL22	10.1466	-0.210619	0.503384	-0.418405	0.675651	0.884094
PGK1	5.54653	-0.207925	0.493723	-0.421136	0.673655	0.884094
KCNMB4	5.89053	-0.201508	0.473185	-0.425855	0.670214	0.884094
MRPL55	5.06977	-0.191416	0.450213	-0.425168	0.670714	0.884094
TIMP1	6.91745	0.229636	0.535537	0.428796	0.668072	0.884094
PSMD2	3.93106	-0.214366	0.506602	-0.423145	0.672189	0.884094
NUMA1	6.23017	-0.193793	0.456754	-0.424284	0.671358	0.884094
IL1F10	4.23917	0.215029	0.497635	0.432101	0.665668	0.884094
CHDH	4.8322	-0.177525	0.41122	-0.431702	0.665958	0.884094
H2AC1	3.89942	-0.195636	0.4668	-0.4191	0.675143	0.884094
CBX6	4.00954	0.237373	0.553933	0.428522	0.668271	0.884094
RPL18A	7.4822	0.217862	0.522475	0.416981	0.676692	0.884354
PDLIM3	6.56314	-0.1971	0.482621	-0.408395	0.682984	0.886826
IGHG4	7.28478	0.159875	0.390758	0.40914	0.682437	0.886826
CRIP2	5.92363	-0.19747	0.486116	-0.40622	0.684581	0.886826
DMPK	4.01362	-0.195854	0.477266	-0.410367	0.681537	0.886826
CDK15	4.88792	-0.171184	0.417118	-0.410397	0.681515	0.886826
NPC2	4.81481	-0.188003	0.459925	-0.408768	0.68271	0.886826
CCDC107	4.65269	0.18484	0.456836	0.40461	0.685764	0.886826
TXN2	4.29692	0.202211	0.493256	0.409952	0.681841	0.886826
ADNP	5.21491	-0.19104	0.47106	-0.405553	0.685071	0.886826
PLCG1	3.81065	-0.196562	0.484933	-0.405338	0.685229	0.886826
PKMYT1	9.42463	0.169475	0.423068	0.400586	0.688725	0.888418
EOMES	7.64458	-0.19061	0.476264	-0.40022	0.688995	0.888418
PPDPF	6.0397	-0.22114	0.552843	-0.400005	0.689153	0.888418
FNDC3A	4.2021	-0.189435	0.476572	-0.397495	0.691002	0.889873
UQCRC2	4.51043	-0.190053	0.48044	-0.395581	0.692414	0.890762
ZYX	5.10144	-0.197466	0.500439	-0.394586	0.693148	0.890778
LAPTM4A	6.01078	0.169437	0.43503	0.389483	0.696919	0.893175
TM9SF2	3.86907	0.218444	0.561371	0.389127	0.697182	0.893175
NOP58	4.24808	0.21128	0.542009	0.389808	0.696678	0.893175
SMARCA4	4.09328	-0.219725	0.567568	-0.387135	0.698656	0.894135
TRIM8	4.3966	0.212336	0.555967	0.381922	0.702519	0.897568
UBE2D3	4.15184	-0.208249	0.545793	-0.381554	0.702792	0.897568
CDK3	4.45821	-0.167828	0.442402	-0.379357	0.704423	0.897794
HDAC7	4.18558	-0.174519	0.458875	-0.380319	0.703708	0.897794
ATP5F1B	5.94343	-0.177808	0.47424	-0.374932	0.707711	0.901054
CFDP1	15.3483	0.118379	0.317283	0.373103	0.709072	0.901857
STIP1	7.92743	-0.138564	0.374956	-0.369548	0.711719	0.903602
MSL1	5.30143	-0.150617	0.407848	-0.369296	0.711907	0.903602
TTYH3	16.4735	-0.119365	0.327703	-0.364247	0.715673	0.90652
LZTS2	4.57244	0.203742	0.558042	0.3651	0.715036	0.90652
CSNK2B	4.16286	0.188715	0.52167	0.361753	0.717537	0.907949
RBM5	4.95609	0.177063	0.494679	0.357935	0.720392	0.910628
IRF3	4.09027	-0.199303	0.558953	-0.356566	0.721417	0.910992
RPS16	5.79741	-0.164531	0.46307	-0.355304	0.722362	0.911195
DCHS2	3.98771	-0.173183	0.488692	-0.354381	0.723053	0.911195
RPL32	19.4757	-0.138156	0.393267	-0.351303	0.725361	0.913091
RPS27	6.9459	-0.167338	0.480259	-0.348432	0.727515	0.913091
KDM4B	5.48028	-0.150965	0.430972	-0.350291	0.72612	0.913091
PRSS23	3.8171	0.21302	0.61099	0.348648	0.727354	0.913091
CAPRIN1	7.43363	0.144883	0.419192	0.345625	0.729625	0.913881
UPK3BL2	6.40184	-0.177372	0.513032	-0.345734	0.729543	0.913881
PFKM	4.03443	-0.160324	0.470515	-0.340741	0.733299	0.916701
UBA1	6.35015	0.162344	0.476886	0.340426	0.733536	0.916701
UQCRHL	4.2144	-0.177799	0.524506	-0.338983	0.734622	0.916701
SH3BGRL3	4.32214	0.223117	0.658771	0.338687	0.734846	0.916701
NPTN	4.057	0.206827	0.617289	0.335058	0.737582	0.919186
IMPDH2	3.81026	0.185477	0.556523	0.333279	0.738924	0.91993
TNNT3	8.91055	-0.102429	0.308298	-0.33224	0.739708	0.919979
GOLGA8A	21.0269	-0.126705	0.38746	-0.327015	0.743656	0.921179
HNRNPC	7.94706	-0.156762	0.478766	-0.327429	0.743343	0.921179
CSNK1A1	4.59118	0.152994	0.466842	0.327722	0.743122	0.921179
EXOSC3	5.06294	-0.153579	0.467695	-0.328375	0.742628	0.921179
TEX9	5.07102	-0.137184	0.420916	-0.325917	0.744487	0.921284
CPLX2	4.93715	0.148707	0.459798	0.323419	0.746378	0.921777
MYC	3.81801	-0.169114	0.522663	-0.323561	0.74627	0.921777
ZNF768	5.12667	-0.140888	0.438236	-0.321488	0.74784	0.92266
GRIN2B	4.11359	-0.153904	0.488296	-0.315186	0.75262	0.927631
EGR1	6.04338	0.139335	0.446492	0.312066	0.75499	0.929392
C6	5.63442	0.149912	0.481531	0.311324	0.755555	0.929392
PTBP1	30.0458	0.101251	0.328944	0.307806	0.75823	0.930467
RDH13	11.0969	-0.104295	0.34283	-0.304217	0.760963	0.930467
MCL1	4.4967	0.141465	0.462777	0.305686	0.759843	0.930467
XRCC5	5.02548	-0.151387	0.500853	-0.302258	0.762456	0.930467
CTSB	5.47273	-0.17765	0.582015	-0.305233	0.760189	0.930467
POLR2A	4.38229	-0.145008	0.478013	-0.303355	0.761619	0.930467
STX4	4.09795	-0.149074	0.492883	-0.302453	0.762307	0.930467
CDH11	4.68803	-0.153558	0.499492	-0.307429	0.758517	0.930467
TMEM250	4.86365	0.131652	0.44299	0.29719	0.766322	0.932069
RPS21	5.4064	0.17049	0.574998	0.296505	0.766844	0.932069
WASHC1	6.76501	0.138051	0.462628	0.298407	0.765393	0.932069
TTC33	4.13669	-0.133023	0.452618	-0.293898	0.768836	0.932069
TLE3	4.9955	-0.152604	0.519738	-0.293617	0.769051	0.932069
ARHGEF1	3.82551	0.15923	0.533997	0.298185	0.765562	0.932069
HMGA2	4.22903	0.136858	0.464969	0.294337	0.7685	0.932069
ACTN2	8.31434	0.11247	0.387874	0.289966	0.771843	0.93276
RPLP1	10.4374	0.14601	0.503645	0.289907	0.771887	0.93276
HP1BP3	4.22803	-0.156431	0.537313	-0.291135	0.770948	0.93276
RPRD1B	15.5057	0.107327	0.371499	0.288902	0.772656	0.932777
RAD21	4.40367	0.136261	0.474652	0.287076	0.774054	0.933552
SRSF1	11.8985	-0.105254	0.370758	-0.283888	0.776496	0.935349
FNDC5	4.15939	-0.129858	0.458615	-0.283153	0.777059	0.935349
SEPTIN2	7.35538	0.146666	0.520507	0.281776	0.778115	0.935708
RPS25	4.58794	-0.155356	0.559313	-0.277762	0.781195	0.938498
TAF1D	4.64262	0.150369	0.548596	0.274098	0.78401	0.940233
H4C13	5.42345	-0.157169	0.573819	-0.2739	0.784162	0.940233
ZNF28	4.62325	0.138848	0.51195	0.271213	0.786227	0.941795
AAMP	22.9439	-0.0834867	0.309533	-0.269718	0.787377	0.942259
RPS14	15.6898	0.122894	0.457952	0.268356	0.788425	0.942599
RAB1A	5.26616	-0.124952	0.469393	-0.266198	0.790086	0.943672
MXRA5	4.09516	0.154341	0.583235	0.26463	0.791295	0.944202
EBF1	6.12447	0.10998	0.422829	0.260106	0.794782	0.944712
PSMB7	4.55059	-0.138399	0.528593	-0.261825	0.793456	0.944712
RAB1B	4.46253	0.150551	0.57635	0.261215	0.793927	0.944712
HM13	3.88993	-0.138823	0.531721	-0.261082	0.79403	0.944712
SRP9	4.16195	-0.144767	0.562404	-0.257407	0.796864	0.946277
RALY	4.3462	-0.120902	0.476695	-0.253626	0.799785	0.948832
IFNA16	5.45682	-0.12104	0.479348	-0.25251	0.800647	0.948944
PRDX1	3.92883	-0.132451	0.532625	-0.248676	0.803611	0.951543
BTF3	9.53325	-0.11175	0.453465	-0.246436	0.805345	0.952683
RPL7	14.5463	0.0989013	0.403896	0.244868	0.806559	0.953206
PRAC1	5.99375	-0.114635	0.476408	-0.240623	0.809847	0.954353
CCDC179	3.83176	0.117071	0.485176	0.241296	0.809326	0.954353
ARHGEF40	4.87627	-0.116198	0.480307	-0.241924	0.808839	0.954353
KRT28	15.9688	-0.0748904	0.3171	-0.236173	0.813299	0.956536
UQCRB	3.86217	-0.120463	0.512089	-0.235239	0.814023	0.956536
LTBP4	3.89198	-0.110809	0.468637	-0.23645	0.813083	0.956536
MAP4K4	4.95999	0.109132	0.469083	0.23265	0.816033	0.957986
MYL12B	7.48958	0.0938514	0.41142	0.228116	0.819556	0.958027
LENG8	17.2808	-0.0766242	0.344514	-0.222412	0.823993	0.958027
MACF1	4.59489	0.100727	0.456534	0.220635	0.825377	0.958027
TRIM28	7.08239	-0.0894463	0.402037	-0.222483	0.823938	0.958027
SDK2	4.49349	-0.111021	0.48781	-0.227591	0.819964	0.958027
KPNB1	4.62886	-0.105445	0.461046	-0.228709	0.819095	0.958027
S100A10	7.68001	-0.11867	0.529788	-0.223995	0.822761	0.958027
NPIPB3	5.36813	0.0979287	0.442519	0.221298	0.82486	0.958027
NDUFB7	3.84077	0.111751	0.504069	0.221697	0.824549	0.958027
ZNF799	5.58815	-0.100608	0.438072	-0.22966	0.818356	0.958027
DNMT3A	4.96663	-0.107695	0.487417	-0.22095	0.825131	0.958027
RBMXL1	4.12709	0.122043	0.529574	0.230456	0.817738	0.958027
LRP1	4.41868	0.113182	0.516887	0.218969	0.826674	0.958631
VHL	3.92646	0.129677	0.596054	0.21756	0.827772	0.959004
INPPL1	4.69415	-0.105111	0.486649	-0.215989	0.828997	0.959523
RPS23	14.5394	0.100017	0.468937	0.213284	0.831106	0.959584
SSR2	9.85687	-0.0830394	0.389983	-0.212931	0.831381	0.959584
POU5F1	8.40023	-0.0875133	0.409761	-0.213572	0.830881	0.959584
BGN	8.77469	0.0868581	0.414072	0.209765	0.833851	0.960463
FAM83E	4.25301	0.0997342	0.479169	0.20814	0.83512	0.960463
DDB1	5.35753	-0.0937998	0.450884	-0.208035	0.835201	0.960463
MDK	8.32857	-0.0991445	0.476725	-0.20797	0.835252	0.960463
RPS6KB1	11.9614	0.0733675	0.360355	0.203598	0.838668	0.961704
CDR2	4.12019	0.128986	0.628168	0.205337	0.837309	0.961704
ZNF592	3.9665	0.12043	0.588863	0.204514	0.837952	0.961704
ACTC1	73.2382	-0.0637769	0.33226	-0.191948	0.847783	0.962732
UBB	7.83419	0.0787722	0.411358	0.191493	0.848139	0.962732
APP	7.15194	0.0852905	0.430245	0.198237	0.84286	0.962732
YWHAZ	7.73407	-0.0819938	0.413818	-0.19814	0.842936	0.962732
STK19	4.35192	0.0972868	0.486064	0.200152	0.841362	0.962732
RHOQ	4.7222	0.0896701	0.454788	0.197169	0.843695	0.962732
SUMO4	4.00399	-0.100549	0.515044	-0.195224	0.845218	0.962732
MTCH1	4.38855	-0.0951978	0.488993	-0.194681	0.845642	0.962732
PDXDC1	4.59502	0.119827	0.595306	0.201286	0.840475	0.962732
CD44	4.59807	-0.0893218	0.466359	-0.19153	0.84811	0.962732
PHB2	3.96625	-0.120055	0.624266	-0.192314	0.847497	0.962732
EMX1	8.94356	-0.0707102	0.380255	-0.185955	0.85248	0.962933
CD27	6.38185	-0.0750181	0.406625	-0.18449	0.853629	0.962933
RPL35A	7.20498	0.0788318	0.425857	0.185113	0.85314	0.962933
ZNF350	6.40594	-0.0783547	0.414081	-0.189226	0.849916	0.962933
RYR1	3.87183	0.0853207	0.460431	0.185306	0.852989	0.962933
ATP5MC2	5.43358	-0.103008	0.561931	-0.183311	0.854554	0.962933
COL5A3	3.9196	-0.0984898	0.534414	-0.184295	0.853782	0.962933
PHLDB2	4.53198	-0.0943393	0.50719	-0.186004	0.852442	0.962933
PPP1CB	5.34003	0.084028	0.470881	0.178449	0.858371	0.966352
MRPL28	4.29289	0.0915796	0.520099	0.176081	0.86023	0.967563
MYL4	5.71438	-0.0857998	0.498396	-0.172152	0.863318	0.968052
HLA-DRB1	5.46147	0.0740967	0.428313	0.172997	0.862654	0.968052
TSPYL2	5.03845	-0.0730852	0.436192	-0.167553	0.866935	0.968052
KLHDC8B	4.64688	-0.0787877	0.462391	-0.170392	0.864702	0.968052
PRPF4B	4.46945	0.0904816	0.531235	0.170323	0.864756	0.968052
CAPN15	3.87546	-0.0850167	0.506236	-0.167939	0.866631	0.968052
SHC1	4.28254	0.0972798	0.571433	0.170238	0.864823	0.968052
SCYL3	3.97282	0.0963294	0.572509	0.168258	0.86638	0.968052
RPL35	15.3354	-0.0661316	0.400812	-0.164994	0.868948	0.968548
RPS7	4.54962	0.0991024	0.598268	0.165649	0.868433	0.968548
RANBP2	4.68723	-0.0770842	0.473037	-0.162956	0.870553	0.969462
PCSK6	4.11417	-0.080821	0.509626	-0.158589	0.873993	0.970666
FNDC3B	3.94443	-0.0755588	0.471604	-0.160217	0.87271	0.970666
UBR4	3.92122	-0.075277	0.473	-0.159148	0.873552	0.970666
EIF5A	6.44174	0.0739913	0.4697	0.157529	0.874828	0.970721
TRIM51	10.6607	-0.0599672	0.386902	-0.154993	0.876827	0.971194
ZNF362	4.37652	-0.0815383	0.5242	-0.155548	0.876389	0.971194
SLF2	4.18278	-0.0742838	0.486141	-0.152803	0.878554	0.972235
RTL8C	13.6585	0.0628957	0.424907	0.148022	0.882325	0.972254
SRRM2	11.0034	-0.0533112	0.36227	-0.147159	0.883007	0.972254
ZNF493	12.6064	0.0569138	0.402251	0.141488	0.887484	0.972254
STMN1	10.5418	-0.0714078	0.501228	-0.142466	0.886712	0.972254
ANKRD65	6.72648	-0.0514168	0.370387	-0.138819	0.889593	0.972254
CRABP2	7.31622	-0.0617452	0.435226	-0.141869	0.887183	0.972254
YME1L1	5.73917	-0.0673422	0.46086	-0.146123	0.883824	0.972254
EDF1	5.41361	-0.0717641	0.504707	-0.14219	0.88693	0.972254
NFIC	4.88992	0.0674736	0.482283	0.139905	0.888735	0.972254
RPL11	6.02647	-0.0818657	0.550479	-0.148717	0.881777	0.972254
EFCAB2	4.49701	-0.0657012	0.459847	-0.142876	0.886388	0.972254
S100A11	6.32288	-0.0788889	0.557192	-0.141583	0.887409	0.972254
ZNF703	3.8604	-0.073016	0.524952	-0.139091	0.889378	0.972254
GOLGA3	4.17253	0.102661	0.688947	0.149011	0.881545	0.972254
KLRC2	6.37294	0.0551159	0.40694	0.13544	0.892264	0.972591
MED13	4.02377	0.0660314	0.484535	0.136278	0.891601	0.972591
CLTC	4.2654	-0.0792775	0.582475	-0.136105	0.891739	0.972591
RPS3	14.6945	0.0612936	0.469396	0.13058	0.896108	0.975162
SCARB2	4.82558	-0.0736786	0.564752	-0.130462	0.896201	0.975162
BRD4	5.90572	0.0575768	0.450228	0.127884	0.898241	0.976521
FN1	35.962	0.0395299	0.35486	0.111396	0.911302	0.982933
APOO	9.22011	0.0440838	0.393435	0.112049	0.910785	0.982933
CD151	4.82719	0.0616906	0.547606	0.112655	0.910304	0.982933
KRTAP9-4	5.60301	0.0550931	0.467194	0.117923	0.906128	0.982933
SRSF11	4.69599	0.064058	0.561997	0.113983	0.909251	0.982933
DMWD	4.46542	0.0558705	0.48888	0.114283	0.909014	0.982933
CLIC1	5.15856	0.0642339	0.55633	0.11546	0.908081	0.982933
ZNF579	4.10126	-0.0638225	0.549844	-0.116074	0.907594	0.982933
RGMA	5.30637	-0.0528201	0.445596	-0.118538	0.905641	0.982933
TMEM132A	4.16665	-0.0575061	0.532749	-0.107942	0.914042	0.985027
RPL7A	22.4209	0.0376516	0.353381	0.106547	0.915149	0.98536
RPS13	7.93887	0.0537826	0.51655	0.104119	0.917075	0.986575
NUCKS1	7.81026	0.0403935	0.393609	0.102623	0.918262	0.986992
MICALL2	91.6801	-0.0255148	0.320282	-0.0796635	0.936505	0.987031
SMIM17	18.5403	-0.0284641	0.323324	-0.0880357	0.929848	0.987031
ZNF267	20.079	-0.0291459	0.353898	-0.0823569	0.934363	0.987031
ZFP37	14.0336	0.0307998	0.35165	0.0875864	0.930205	0.987031
RPL5	14.9901	-0.0256347	0.361317	-0.0709481	0.943439	0.987031
RPSA	11.0525	-0.0295119	0.43318	-0.0681285	0.945683	0.987031
CSDE1	6.83963	-0.0288189	0.454737	-0.0633748	0.949468	0.987031
RPL26	12.6526	0.0312571	0.457882	0.0682644	0.945575	0.987031
PPP1R14B	6.63423	-0.0407293	0.413168	-0.0985779	0.921473	0.987031
RGS7BP	7.49512	-0.0294408	0.428808	-0.0686572	0.945262	0.987031
CCDC8	5.93975	0.0314767	0.446158	0.0705506	0.943755	0.987031
GNAI2	6.38827	0.0430382	0.475188	0.0905709	0.927834	0.987031
SRRM3	6.52951	-0.0319969	0.435548	-0.0734635	0.941437	0.987031
H2AJ	4.91078	-0.0334268	0.435101	-0.0768253	0.938763	0.987031
MAGEA8	6.4906	0.0341576	0.499544	0.0683776	0.945485	0.987031
ITGA5	6.46058	-0.0423695	0.52313	-0.0809924	0.935448	0.987031
ZNF776	6.42525	-0.0349925	0.434723	-0.0804939	0.935844	0.987031
FAM3A	5.60305	-0.0356299	0.483539	-0.0736857	0.94126	0.987031
RPL10L	5.43973	0.0351623	0.495188	0.0710078	0.943392	0.987031
CHPF	4.74485	-0.0416445	0.503782	-0.0826637	0.934119	0.987031
SRGAP2B	4.00469	0.0426358	0.472891	0.0901599	0.92816	0.987031
CAV1	7.39312	-0.0389016	0.539251	-0.0721401	0.94249	0.987031
PABPC4	5.16217	-0.0312862	0.492653	-0.0635056	0.949364	0.987031
SRSF2	5.34965	0.0316137	0.478793	0.0660279	0.947356	0.987031
SSX3	3.89606	0.0423007	0.483874	0.0874209	0.930337	0.987031
ACTR3	4.17852	-0.0394882	0.529977	-0.0745092	0.940605	0.987031
PRRC2A	4.98016	-0.0330316	0.436154	-0.0757338	0.939631	0.987031
CMA1	4.89489	-0.033264	0.470367	-0.0707193	0.943621	0.987031
GSTP1	4.94215	-0.0401025	0.533024	-0.0752358	0.940027	0.987031
ZFP41	4.79363	-0.0417075	0.460137	-0.0906415	0.927777	0.987031
CPTP	4.0704	0.0321222	0.492325	0.0652459	0.947978	0.987031
MXD4	4.73721	0.0405526	0.505495	0.0802235	0.93606	0.987031
UBE2V1	3.95917	-0.0430325	0.497168	-0.0865552	0.931025	0.987031
KDELR1	4.0009	0.037756	0.554532	0.0680862	0.945717	0.987031
ZNF117	4.07523	0.0313526	0.483687	0.06482	0.948317	0.987031
AP2A2	4.04261	-0.0317798	0.49359	-0.0643849	0.948664	0.987031
PTPRS	3.99526	0.0314491	0.493925	0.0636717	0.949232	0.987031
FAM114A1	4.15985	-0.0598403	0.604281	-0.0990271	0.921117	0.987031
THBS3	3.91616	0.0431947	0.59149	0.0730269	0.941785	0.987031
CARD11	8.16288	0.0240345	0.423319	0.0567764	0.954723	0.990184
SULT1C4	11.3671	0.0176351	0.326374	0.0540336	0.956908	0.990184
JOSD2	6.2672	0.0218957	0.425034	0.0515151	0.958915	0.990184
OLFML2B	8.9928	0.0299562	0.513902	0.0582917	0.953516	0.990184
EIF4B	6.17577	-0.0251808	0.47672	-0.052821	0.957874	0.990184
COPA	4.35399	-0.0286459	0.525085	-0.0545549	0.956493	0.990184
FBXW11	4.10557	-0.0258147	0.500941	-0.0515324	0.958901	0.990184
GSK3A	3.90915	0.0272226	0.514171	0.0529447	0.957776	0.990184
CALR	10.9862	-0.0182205	0.447015	-0.0407604	0.967487	0.990283
ADPRS	10.4901	-0.0156691	0.361019	-0.0434024	0.965381	0.990283
RHOV	7.46433	0.0209813	0.469846	0.0446558	0.964382	0.990283
CCDC68	5.82923	-0.0163439	0.392168	-0.0416759	0.966757	0.990283
ITM2C	4.66427	0.0243592	0.512105	0.0475668	0.962062	0.990283
NCOR2	5.98108	0.0236679	0.498192	0.0475075	0.962109	0.990283
STMN3	5.58894	0.0190594	0.484697	0.0393222	0.968634	0.990283
DDOST	4.33468	0.0208898	0.524536	0.0398253	0.968232	0.990283
EMP3	6.38571	0.0247982	0.526707	0.0470815	0.962448	0.990283
RPN2	3.96518	0.0253569	0.513052	0.0494236	0.960582	0.990283
SUPT5H	4.22914	-0.0202344	0.511106	-0.0395894	0.96842	0.990283
SPON2	9.42814	-0.0217072	0.513299	-0.0422896	0.966268	0.990283
PARM1	4.32806	0.0188653	0.497734	0.0379024	0.969766	0.990621
ZNF577	4.79072	0.0169435	0.468033	0.0362016	0.971122	0.991186
RPS4Y1	5.31967	0.0190774	0.554707	0.0343919	0.972565	0.991839
KLHL41	4.18241	-0.0156528	0.510793	-0.0306442	0.975553	0.992429
FBRS	5.37381	0.0160031	0.514592	0.0310986	0.975191	0.992429
HSP90AA1	4.50045	-0.0168963	0.549062	-0.030773	0.975451	0.992429
ACTA2	11.5407	-0.00798987	0.367872	-0.0217192	0.982672	0.993028
TPM3	9.46246	-0.011086	0.397576	-0.027884	0.977755	0.993028
RPL29	13.6267	0.0137965	0.484334	0.0284856	0.977275	0.993028
CDKN2D	9.43914	-0.00840429	0.396382	-0.0212025	0.983084	0.993028
PTMS	16.8732	0.0102896	0.437917	0.0234966	0.981254	0.993028
CSTF3	8.20877	-0.0079619	0.382195	-0.020832	0.98338	0.993028
HLA-DQB2	5.15928	0.011523	0.441756	0.0260846	0.97919	0.993028
RPL39	6.29424	0.0118604	0.531373	0.0223204	0.982192	0.993028
ACLY	3.86812	-0.0112235	0.528412	-0.0212401	0.983054	0.993028
CCDC102A	7.1601	0.00655304	0.381667	0.0171695	0.986301	0.993542
FUBP1	5.83644	0.00843682	0.470582	0.0179285	0.985696	0.993542
MXRA8	6.88721	0.00885031	0.489798	0.0180693	0.985584	0.993542
PHLDB1	4.0752	0.00798113	0.578887	0.013787	0.989	0.995448
FKBP10	12.0428	-0.00483829	0.414291	-0.0116785	0.990682	0.996329
TTN	6.93576	-0.00397483	0.422803	-0.00940113	0.992499	0.997344
CFAP410	4.29044	0.00414669	0.566165	0.00732417	0.994156	0.998197
MORF4L2	5.16846	-0.00305946	0.487569	-0.00627493	0.994993	0.998226
RPS11	11.1521	0.00128553	0.457621	0.00280915	0.997759	0.999347
CDC42	3.95945	0.000422866	0.516374	0.000818914	0.999347	0.999347
BMP1	5.03552	0.000621761	0.501961	0.00123866	0.999012	0.999347
NSD2	4.81535	0.00154299	0.471862	0.00327	0.997391	0.999347
PDE4DIP	3.11958	0.394079	0.491213	0.802257	0.422404
MB	2.49059	1.52381	0.65108	2.34044	0.0192609
LDB3	3.37256	1.59309	0.58581	2.71946	0.00653888
MYBPC1	3.21592	0.50529	0.489513	1.03223	0.301965
MYH2	2.92141	0.207008	0.481434	0.429982	0.667209
SLN	2.94498	-0.0402108	0.473445	-0.0849324	0.932315
TNNT2	3.05744	-0.626318	0.511087	-1.22546	0.220401
STAC3	3.37874	0.138625	0.521266	0.265939	0.790286
PYGM	3.36867	0.685468	0.515204	1.33048	0.18336
CASQ2	2.98514	0.878616	0.556221	1.57962	0.114194
CA3	2.30505	0.713721	0.569845	1.25248	0.210394
LCE2D	3.60666	-0.435726	0.440663	-0.988796	0.322763
MYH7	2.76157	1.14766	0.573548	2.00099	0.0453933
CDH15	3.73509	-0.551721	0.457862	-1.20499	0.228205
RASSF4	3.17988	-0.311476	0.517714	-0.601636	0.547416
ATP2A3	2.49986	0.317635	0.546643	0.581066	0.561196
NDRG2	3.64793	-0.223011	0.457869	-0.487062	0.626214
CYB5R1	3.34674	0.0107058	0.570666	0.0187602	0.985032
MYOZ1	3.36097	0.682986	0.484307	1.41023	0.15847
RBM24	3.77187	0.0333452	0.580876	0.0574051	0.954222
MEF2C	3.6627	0.213439	0.445371	0.479238	0.631769
TCAP	2.46906	0.876831	0.60106	1.45881	0.144618
NPNT	3.49057	0.4788	0.507512	0.943427	0.345462
RASL10A	3.53604	-0.13852	0.49809	-0.278102	0.780934
CHRNB1	3.37131	-1.16501	0.481987	-2.41711	0.0156444
HSPB8	2.32172	-0.719717	0.54817	-1.31295	0.189201
DKK1	3.68813	0.655347	0.622206	1.05326	0.29222
MUSTN1	2.82375	0.268505	0.546432	0.491378	0.623159
EFHD2	2.74803	-0.695454	0.62115	-1.11962	0.262875
DLK1	2.98565	-0.682004	0.464801	-1.4673	0.142294
NEBL	3.12942	1.09002	0.613272	1.77738	0.075505
CACNA2D1	3.16299	-0.0463209	0.498981	-0.0928309	0.926038
TNNI1	2.34851	0.777405	0.597275	1.30159	0.193058
ATP1A1	3.55402	0.268507	0.502784	0.534041	0.593313
UNC45B	3.06002	0.332532	0.493372	0.673999	0.500312
CYP2W1	3.3346	0.0806922	0.507417	0.159025	0.873649
COX5A	3.24119	-0.398363	0.535446	-0.743983	0.456887
SETD7	3.58211	-0.419674	0.456676	-0.918975	0.358109
KREMEN2	2.36323	-1.39617	0.554055	-2.51991	0.0117386
SYNPO2L	3.05681	-0.370133	0.527617	-0.701518	0.48298
MDH1	2.94234	0.645764	0.600606	1.07519	0.282291
NEXN	3.48896	0.966351	0.670328	1.44161	0.149413
HSD17B3	2.8717	-0.493306	0.558523	-0.883232	0.377111
PSMD3	3.66537	0.643216	0.571099	1.12628	0.260048
FAM171A2	3.62621	-1.09686	0.473151	-2.31821	0.0204381
ADAM9	3.35463	-0.619772	0.518074	-1.1963	0.23158
MYL12A	3.09335	-0.223615	0.530541	-0.421485	0.673401
PDZD2	2.18269	0.477586	0.642288	0.74357	0.457137
IFRD2	3.73077	1.11705	0.575742	1.94019	0.0523568
ATP2B1	3.0046	-0.0670817	0.535022	-0.125381	0.900222
COL24A1	3.62703	0.417853	0.480441	0.869729	0.384449
EHBP1L1	3.47763	0.63562	0.507735	1.25187	0.210616
SH3GLB1	3.62071	0.695933	0.567791	1.22569	0.220317
MYOM1	2.73936	-0.0838535	0.50899	-0.164745	0.869145
MYOM3	2.78134	0.187256	0.529476	0.353662	0.723592
HLA-DQB1	2.81255	1.00732	0.58041	1.73554	0.0826459
CNIH1	2.46264	-1.18089	0.584839	-2.01916	0.0434702
MYH7B	2.90946	0.632621	0.521087	1.21404	0.224732
TMEM38A	2.98549	0.472397	0.597051	0.791218	0.428817
UGP2	3.22386	-0.0882648	0.520726	-0.169503	0.865401
UQCRC1	2.86578	0.0235059	0.591567	0.0397351	0.968304
MYL3	1.90341	0.00478897	0.609627	0.00785557	0.993732
ATP5PF	3.29712	0.105691	0.537304	0.196705	0.844058
GYS1	3.26609	-0.649043	0.474977	-1.36647	0.171791
SMPX	2.89926	0.237831	0.530912	0.447967	0.654177
PNPLA2	3.48062	-0.403997	0.492231	-0.820747	0.41179
TM9SF3	3.79053	-0.403219	0.455275	-0.88566	0.375801
GGTLC1	2.30607	-0.226747	0.554248	-0.409107	0.682461
HRC	2.6654	-1.14785	0.51704	-2.22004	0.0264159
CTSD	3.52802	-0.749642	0.518139	-1.4468	0.147954
PRKAR1A	3.4282	-0.715526	0.457246	-1.56486	0.117616
PLAUR	3.10108	0.278035	0.505354	0.55018	0.582196
VCP	3.27236	-0.121864	0.521808	-0.233542	0.815341
SLC25A5	3.63298	-0.159204	0.507373	-0.31378	0.753688
OSBPL2	3.61596	-0.60627	0.467507	-1.29681	0.194695
GSN	3.29724	-0.677451	0.499526	-1.35619	0.175039
SOX8	3.43199	-0.314451	0.510663	-0.61577	0.538047
ANKRD1	2.34527	0.738107	0.612274	1.20552	0.228004
CACNA1S	1.94018	-0.11684	0.590723	-0.197791	0.843209
ATP1B3	2.97685	-0.657044	0.541015	-1.21447	0.22457
CAVIN4	2.37389	0.348	0.576517	0.603625	0.546093
GPR87	3.26001	0.264627	0.518726	0.510147	0.609948
TOB1	3.06342	-0.782744	0.51741	-1.51281	0.130327
SYPL2	2.24471	-0.285276	0.538137	-0.530119	0.59603
TRIM54	2.73916	-0.350549	0.516818	-0.678284	0.497592
PET117	3.70664	0.31842	0.490798	0.64878	0.516481
CAP2	2.69279	-0.413475	0.513091	-0.80585	0.420329
NDUFS2	3.74019	1.04327	0.577676	1.80598	0.0709211
RAPGEF1	3.34074	-0.0669635	0.486639	-0.137604	0.890553
ATP5MF	3.74128	0.613541	0.550603	1.11431	0.265148
SCT	3.66118	0.184875	0.458198	0.403483	0.686593
TCEAL7	3.44036	0.505234	0.539166	0.937067	0.348724
DYNLL2	3.66869	-0.150842	0.494097	-0.305289	0.760146
OGN	3.56794	-0.282017	0.472767	-0.596524	0.550825
CYC1	3.41693	0.53671	0.522016	1.02815	0.30388
DDR1	3.71235	-0.142546	0.484846	-0.294001	0.768757
MYOZ2	2.62919	-0.052382	0.582898	-0.0898649	0.928395
ANO7	3.44465	-0.206903	0.491231	-0.421193	0.673614
VDAC2	3.49947	0.048346	0.499177	0.0968514	0.922844
INSYN2B	3.25889	0.629469	0.530294	1.18702	0.23522
KLHL31	2.91971	0.257161	0.492686	0.521958	0.6017
MAP1A	3.42264	0.439807	0.566767	0.775992	0.437754
SLC35B1	2.0309	-0.137376	0.612915	-0.224135	0.822652
SEMA6C	2.96859	-0.609395	0.503059	-1.21138	0.225751
IGF2R	3.55178	0.0937729	0.496246	0.188965	0.850121
GRB2	2.84575	0.0855025	0.573468	0.149097	0.881477
AP5S1	2.33214	0.154406	0.613514	0.251676	0.801292
RAB7A	3.72463	0.264148	0.553103	0.477574	0.632953
BAG3	2.73826	0.417136	0.573686	0.727116	0.467155
ECPAS	3.66731	0.191732	0.484823	0.395468	0.692497
CXXC5	3.7761	0.842181	0.55948	1.50529	0.132249
PGAM2	2.94626	0.0761621	0.549816	0.138523	0.889827
USP9X	3.28045	-0.235459	0.548861	-0.428996	0.667926
ORM2	3.74933	0.312356	0.540695	0.577694	0.56347
CAV3	2.23242	0.195731	0.606771	0.322578	0.747015
PLAT	3.30628	1.00419	0.578654	1.73539	0.0826726
PDHA1	3.27977	0.295475	0.501502	0.589181	0.55574
FAM47A	3.31329	-0.097743	0.486922	-0.200736	0.840905
ITGA4	2.21213	0.597483	0.630375	0.947821	0.343221
DGCR6L	3.74966	0.26885	0.493388	0.544906	0.585818
NDUFS3	3.35562	-0.132481	0.516687	-0.256404	0.797639
FITM1	2.45708	-0.121834	0.606699	-0.200815	0.840844
HIPK3	2.59626	-0.746865	0.517958	-1.44194	0.149318
CACNA1I	2.80256	1.25425	0.626318	2.00258	0.0452224
SHD	3.16307	-0.785062	0.558818	-1.40486	0.160062
MRGPRX4	2.86212	0.0796472	0.525306	0.151621	0.879486
CNBP	3.39352	0.432714	0.536485	0.806572	0.419913
CHRNG	2.69491	-0.0503203	0.53917	-0.0933291	0.925642
NRAP	1.85117	0.285798	0.619541	0.461307	0.644578
PPP3CB	3.44718	-0.358623	0.473985	-0.756614	0.449281
TEAD4	2.72321	0.684144	0.635634	1.07632	0.281785
TRDN	2.61032	-0.207623	0.521386	-0.398213	0.690473
DAG1	3.06631	-0.745234	0.48543	-1.5352	0.124734
CDCA3	3.57112	-0.562902	0.458281	-1.22829	0.219338
PLG	3.51784	-0.65803	0.507132	-1.29755	0.194441
PPP2CA	3.58088	-0.571075	0.489831	-1.16586	0.24367
CLIC6	2.99064	-0.032108	0.598382	-0.053658	0.957208
PPP1R35	3.66814	0.283646	0.504189	0.56258	0.573721
AXIN1	3.28869	0.776544	0.556174	1.39623	0.162646
DST	2.9611	-0.12643	0.558492	-0.226378	0.820907
CALM1	3.52251	-0.0687226	0.538048	-0.127726	0.898366
JPH2	2.87682	-0.450446	0.494773	-0.910409	0.362607
USO1	3.01774	-0.396239	0.506004	-0.783075	0.433583
AMOTL2	2.21974	0.385829	0.590915	0.652934	0.513799
GGA2	3.09285	0.370597	0.527313	0.702803	0.482179
PRMT1	3.63926	-0.46237	0.524606	-0.881366	0.37812
NECAB2	3.33341	0.189236	0.51685	0.366133	0.714266
TUBA4A	2.40766	-0.0411551	0.593097	-0.0693902	0.944679
PDZRN3	3.17186	0.918318	0.653957	1.40425	0.160244
TACC2	2.93902	-0.47353	0.520706	-0.909401	0.363139
PLS3	3.23067	-0.545225	0.534195	-1.02065	0.307421
BMPR2	2.76212	0.666523	0.562979	1.18392	0.236444
UBE2L3	3.65772	0.298042	0.569266	0.523555	0.600588
UQCR11	3.23522	-0.535805	0.518836	-1.03271	0.301741
GP6	3.0923	-0.0609607	0.551535	-0.110529	0.91199
PBXIP1	3.22645	0.101027	0.60637	0.16661	0.867677
SNCA	3.78512	-0.00102179	0.453056	-0.00225533	0.998201
H1-7	3.68456	-0.00162903	0.480521	-0.00339014	0.997295
MYO18A	2.83335	1.0148	0.619749	1.63744	0.101539
HCK	2.9888	-0.381553	0.541364	-0.7048	0.480935
PPFIA4	2.68417	0.388324	0.557132	0.697005	0.485799
RBM8A	3.35943	0.149149	0.568623	0.262299	0.793091
NCAM1	2.73465	-0.112573	0.517876	-0.217374	0.827917
JAM3	2.50603	-0.434609	0.593578	-0.732185	0.464055
COX6B1	3.75473	0.498172	0.579222	0.860072	0.38975
LMCD1	2.95169	0.109332	0.548994	0.199149	0.842146
YWHAG	3.10124	0.17527	0.547218	0.320293	0.748746
KAT7	3.40717	-0.352351	0.529158	-0.665871	0.505494
SEMA3C	3.33448	-0.371879	0.516319	-0.720251	0.47137
CCN2	2.85982	0.0537416	0.528919	0.101606	0.919069
MKNK1	1.87261	-0.100955	0.606551	-0.166441	0.86781
RAB2A	3.46254	0.443166	0.536795	0.825578	0.409044
MRPL33	3.26807	0.0483697	0.528	0.0916093	0.927008
RGS2	2.67731	0.115957	0.543913	0.213191	0.831178
B3GAT3	2.93097	-0.0961909	0.554925	-0.173341	0.862384
MEF2D	2.54045	0.427816	0.586822	0.729039	0.465978
XRCC6	3.76868	-0.506783	0.514725	-0.984571	0.324835
FLYWCH2	3.51165	-0.386975	0.494075	-0.783231	0.433492
PSG11	3.48905	-1.18625	0.462887	-2.56272	0.0103857
TNK2	2.7218	-0.0936733	0.624636	-0.149965	0.880792
AKR1E2	3.68131	-0.578918	0.483225	-1.19803	0.230906
PRRC1	3.44773	-1.00704	0.526905	-1.91124	0.0559739
PPP2R3B	2.66016	0.263271	0.578819	0.454841	0.649224
IDH3B	2.82138	-0.166014	0.550927	-0.301335	0.763159
SERINC1	2.72184	0.526939	0.616256	0.855065	0.392515
AGO2	2.8563	0.89289	0.560982	1.59165	0.111462
DAPK3	3.14509	0.145648	0.584598	0.249142	0.803251
LRP5	3.72426	0.0378579	0.446088	0.0848666	0.932367
SAP18	3.41951	0.281095	0.552536	0.508736	0.610937
FURIN	3.20411	0.652627	0.638391	1.0223	0.306639
ARID1A	3.48374	-0.00482775	0.49836	-0.00968728	0.992271
SIRT2	3.24542	-0.257626	0.527235	-0.488637	0.625099
PRDX6	2.57494	0.369591	0.594293	0.6219	0.534008
LGMN	3.24068	0.0997844	0.490614	0.203387	0.838833
NEK4	3.61784	0.0423147	0.530981	0.0796916	0.936483
TRAF3IP3	3.37459	0.0375488	0.531606	0.0706328	0.94369
SEMA6A	3.23272	-1.33552	0.495769	-2.69383	0.00706356
WDR5	2.93388	0.0260365	0.566826	0.0459339	0.963363
GLUL	3.58655	1.12019	0.566181	1.97849	0.0478729
C4orf3	3.31297	-0.959482	0.483699	-1.98364	0.0472964
CSK	3.07656	-0.396841	0.520895	-0.761845	0.446153
UBE2E3	3.26988	-0.823202	0.558099	-1.47501	0.14021
MIDEAS	3.44716	-1.23238	0.467682	-2.63509	0.00841146
NCOA1	3.1678	-0.935708	0.466686	-2.005	0.0449625
PITX1	3.71098	-0.724863	0.469164	-1.54501	0.122344
UBE2H	3.03523	-0.459969	0.574265	-0.80097	0.423149
ELOB	3.10893	0.21921	0.595372	0.368189	0.712732
SGCB	3.26878	0.572721	0.572719	1	0.317309
MGRN1	3.22559	0.483052	0.60267	0.801519	0.422831
FOSL2	3.28018	-0.260417	0.534548	-0.487173	0.626136
MICAL1	2.63285	-1.06891	0.538318	-1.98564	0.0470729
LTF	3.37407	-0.350568	0.485164	-0.722576	0.46994
MYO1C	3.53957	-0.728606	0.45477	-1.60214	0.109124
RHOC	3.62252	-0.238206	0.545888	-0.436365	0.662572
TSNAX	3.20193	0.0232577	0.517265	0.0449629	0.964137
GET4	2.28528	0.283244	0.651001	0.43509	0.663497
CKMT2	2.05148	0.506819	0.647174	0.783126	0.433553
ADGRG1	2.30769	-0.94835	0.611207	-1.5516	0.120758
GLG1	3.20621	0.473556	0.534249	0.886394	0.375405
DNAJA1	3.72513	0.207982	0.524507	0.396528	0.691716
SGCD	2.81638	-0.366111	0.544595	-0.672263	0.501416
ATP1A2	2.60754	-0.272302	0.527786	-0.515933	0.605902
LIMA1	3.38077	0.126537	0.6022	0.210125	0.83357
PLPP4	3.48717	-1.36522	0.487829	-2.79856	0.00513309
CDRT4	3.59464	-0.724064	0.518658	-1.39604	0.162704
XIRP2	2.08619	0.357079	0.64601	0.552746	0.580437
ABLIM3	3.02978	0.872079	0.52191	1.67094	0.0947338
GPRC5B	2.05783	0.0401582	0.616686	0.0651194	0.948079
CDV3	2.64391	0.0988338	0.581349	0.170008	0.865004
SNRPD3	3.39158	0.601249	0.57969	1.03719	0.299647
HSPE1	3.05885	-0.0780123	0.530072	-0.147173	0.882995
COX5B	3.54235	0.642637	0.534189	1.20302	0.22897
KPNA3	3.50829	0.581909	0.530474	1.09696	0.272659
SCRIB	2.63134	0.0794748	0.532213	0.149329	0.881294
PSMD8	3.07285	0.551313	0.604968	0.91131	0.362132
MZF1	3.5388	0.129853	0.513469	0.252894	0.80035
HSPB3	2.45425	-0.396047	0.535754	-0.739232	0.459766
CXCR4	3.27862	-0.447501	0.475365	-0.941385	0.346507
TGFB3	3.14254	0.0750045	0.556676	0.134736	0.89282
PDAP1	3.57832	-0.560328	0.533523	-1.05024	0.293607
MAPKAPK2	2.89046	-0.123776	0.558491	-0.221626	0.824605
PGPEP1	3.20714	0.721784	0.543777	1.32735	0.184392
GOLGA8F	3.20169	1.10207	0.664076	1.65955	0.0970058
RGMB	3.64553	-0.544774	0.472941	-1.15189	0.249368
ERBB2	2.79476	0.0938757	0.585356	0.160374	0.872587
CCT7	3.32131	0.0673379	0.52266	0.128837	0.897487
MAGEA4	3.4521	-0.59375	0.497625	-1.19317	0.232803
FAU	3.52198	-0.421427	0.573399	-0.734962	0.462363
B4GALT1	3.32621	-0.345207	0.527763	-0.654095	0.513051
NPEPPS	3.57891	-0.407081	0.530371	-0.767541	0.44276
SARS1	2.96567	0.0200404	0.524362	0.0382186	0.969513
CCT8	3.19978	-0.120688	0.543203	-0.222179	0.824175
RABAC1	3.39783	0.544302	0.650984	0.836123	0.403086
PLEKHG4	3.72486	-0.196396	0.545295	-0.360165	0.718724
CDKN1B	3.6559	0.0676273	0.492278	0.137376	0.890733
HMGCLL1	3.55808	-0.0774609	0.562933	-0.137602	0.890555
OLR1	3.05917	0.00675341	0.573015	0.0117857	0.990597
ANAPC15	2.65772	-0.838505	0.546351	-1.53474	0.124848
MTCH2	3.51098	0.162424	0.51643	0.314513	0.753131
TBC1D3C	3.78976	0.187979	0.568257	0.330799	0.740796
ANKRD11	3.41719	-0.0792087	0.544303	-0.145523	0.884298
AKAP13	3.29572	-0.0554804	0.491362	-0.112911	0.910101
ATXN2L	3.71601	-0.0377714	0.49806	-0.075837	0.939549
ANKRD17	3.50963	0.221106	0.511076	0.432629	0.665284
AXDND1	1.53587	-0.619644	0.681511	-0.909221	0.363233
ENTPD2	2.86507	0.365197	0.535389	0.682116	0.495165
B4GALT2	3.75664	1.02139	0.602455	1.69538	0.0900028
NAT8B	3.30466	0.47774	0.508325	0.939832	0.347304
CBL	3.52957	0.316779	0.499385	0.634339	0.52586
MTDH	3.60317	-0.575956	0.479804	-1.2004	0.229985
TSPAN3	3.36658	-0.54554	0.577409	-0.944808	0.344757
MAMDC2	2.49937	-0.861113	0.569227	-1.51278	0.130336
CD59	3.16438	-0.0424837	0.598882	-0.0709384	0.943447
NDUFV1	3.20836	1.13261	0.609501	1.85826	0.0631324
BANF1	3.78393	-0.333805	0.577478	-0.57804	0.563237
ANK1	2.04505	-0.140617	0.5897	-0.238454	0.811529
AKT1	3.50052	0.23556	0.54531	0.431975	0.665759
SSC4D	3.59938	0.456474	0.502199	0.908949	0.363377
HS2ST1	2.14508	-0.134746	0.651783	-0.206734	0.836217
PURB	2.7267	0.29608	0.587261	0.504172	0.614141
LRP6	2.98115	0.169995	0.510958	0.332698	0.739363
TNIK	3.31033	-0.585312	0.517322	-1.13143	0.257875
SMYD1	1.71216	-1.02542	0.645677	-1.58814	0.112256
CAMK2D	2.69652	-0.160784	0.585235	-0.274734	0.78352
MAPK1	2.54843	-0.0954572	0.562922	-0.169575	0.865345
MCM5	3.71119	-0.137664	0.470823	-0.29239	0.769988
IRF9	3.76381	-0.669088	0.485532	-1.37805	0.168187
WRNIP1	2.63795	-0.623989	0.57899	-1.07772	0.281159
ACHE	2.78076	0.663446	0.573323	1.15719	0.247193
PLXNB2	2.86615	-0.238558	0.508482	-0.469157	0.638957
NECTIN2	3.7179	0.405322	0.561655	0.721656	0.470506
SDCBP	2.79311	-0.810577	0.57208	-1.41689	0.156514
KHDC4	3.74853	0.55077	0.537998	1.02374	0.305958
WAC	3.37251	0.15006	0.510385	0.294013	0.768748
VAPB	2.28979	0.00885193	0.563135	0.015719	0.987459
PNRC1	3.41482	-0.420549	0.515195	-0.816292	0.414333
FOXO3	3.75759	0.874171	0.593078	1.47396	0.140493
CAPZB	3.79471	-0.909848	0.534444	-1.70242	0.088677
MYH10	3.33183	-0.497056	0.500278	-0.993561	0.320437
YTHDC1	3.50268	-0.136195	0.5824	-0.233851	0.8151
HSPA4	3.0662	-0.0636751	0.529777	-0.120192	0.904331
SMARCB1	3.73557	0.586154	0.570991	1.02656	0.30463
ACOT11	3.0707	-0.164911	0.519077	-0.317701	0.750712
TEAD1	2.9694	-0.00304858	0.577419	-0.00527967	0.995787
RNF187	2.75684	-0.0418552	0.579956	-0.0721697	0.942467
SNTB1	2.42623	0.206442	0.570644	0.36177	0.717524
EHD1	2.92575	0.802943	0.660186	1.21624	0.223895
FAM118A	3.25446	0.0639707	0.50501	0.126672	0.8992
SMCP	3.66768	-1.1471	0.467674	-2.45277	0.0141762
BACH1	3.55963	-0.632721	0.495611	-1.27665	0.201726
PNMA3	3.45189	-0.105608	0.49146	-0.214886	0.829856
SHMT2	2.54509	-0.739853	0.530948	-1.39346	0.163482
IPO5	3.09719	-0.52793	0.541583	-0.974792	0.329664
TBCA	3.40627	-0.0152983	0.586985	-0.0260625	0.979207
CTNNBL1	3.16126	-1.3636	0.541679	-2.51736	0.0118237
DYRK2	3.19542	0.543726	0.530898	1.02416	0.305759
MAP7D1	2.50985	-0.917348	0.540159	-1.69829	0.0894525
APIP	3.31831	0.115156	0.509306	0.226103	0.821122
KTN1	3.0838	-0.355147	0.552283	-0.643053	0.52019
NR2F2	2.8625	0.451909	0.575193	0.785665	0.432064
NUDT21	2.80127	0.468052	0.567282	0.825078	0.409327
DSTYK	3.33139	-0.078886	0.499685	-0.157871	0.874558
RAB11B	3.62112	-0.63549	0.524714	-1.21112	0.225851
TRIP6	2.84197	0.0447262	0.550141	0.0812995	0.935204
SUN2	2.88919	-1.25255	0.519156	-2.41266	0.0158365
BRD3	3.67758	-0.572729	0.464722	-1.23241	0.217796
ZDHHC5	3.44104	-0.0775283	0.557726	-0.139008	0.889444
SLC16A12	2.88249	-0.567191	0.514677	-1.10203	0.270447
NKX2-5	2.94691	0.408803	0.581255	0.703311	0.481862
C1QL2	3.6737	-0.59917	0.495188	-1.20998	0.226285
ANTXR2	2.60237	-0.573068	0.513422	-1.11617	0.264348
MTIF3	2.29882	0.806891	0.655843	1.23031	0.218581
CLEC3B	2.48411	-0.0705653	0.542101	-0.13017	0.896432
PITX2	3.33266	-0.0615183	0.527374	-0.11665	0.907137
RARA	2.81138	0.0438965	0.573061	0.0766	0.938942
DTNBP1	3.66303	-0.683363	0.48605	-1.40595	0.159738
CD99	3.34998	0.332589	0.574587	0.578831	0.562703
PIK3R1	2.95707	-1.03626	0.496514	-2.08707	0.0368818
PIK3C2A	3.63446	0.807519	0.554409	1.45654	0.145243
CCDC51	1.79025	-0.579075	0.640317	-0.904358	0.365806
ZBTB3	3.41721	-0.00241104	0.505959	-0.00476529	0.996198
PTP4A1	2.69948	-0.242997	0.544631	-0.446169	0.655475
ZFAND5	2.54627	0.14302	0.554925	0.257729	0.796616
OR56A4	3.78622	0.149861	0.497098	0.301472	0.763054
AGL	2.53818	0.820622	0.623637	1.31586	0.18822
TOX4	3.13641	-0.339777	0.507115	-0.670018	0.502846
MTA1	3.67697	1.15269	0.600751	1.91875	0.0550159
SLC22A23	3.59079	0.417414	0.523391	0.797519	0.42515
EIF5	3.25052	0.0660329	0.524204	0.125968	0.899757
KIFC3	1.90396	0.0370616	0.623242	0.0594658	0.952581
SMIM19	3.39011	0.24087	0.570261	0.422386	0.672743
ZC4H2	3.31666	-0.272454	0.479712	-0.567955	0.570066
PEAK1	3.26351	-0.148797	0.504903	-0.294704	0.76822
ETFA	2.85585	-0.449504	0.534527	-0.840938	0.400383
MARK4	3.44235	0.853738	0.680169	1.25518	0.209412
ALG10B	3.72742	-0.280172	0.495512	-0.565418	0.571789
NEDD8	3.77891	0.211204	0.616135	0.342789	0.731758
ADGRA3	3.20803	1.03238	0.642652	1.60644	0.108177
ZNHIT1	3.57677	0.160064	0.60037	0.266609	0.789771
EIF3E	3.70056	-1.18715	0.482446	-2.4607	0.0138666
PPP3R1	3.03163	1.32154	0.657423	2.01018	0.0444117
TSR3	3.13764	-0.127473	0.497035	-0.256466	0.797591
PRKRIP1	3.37563	0.550932	0.551119	0.999661	0.317475
HTRA1	3.62006	-0.80423	0.502676	-1.5999	0.109621
UBAP2L	3.55642	-0.161194	0.506222	-0.318425	0.750163
TARDBP	3.68263	-0.136155	0.543547	-0.250493	0.802206
EIF4G3	3.32233	-0.158146	0.487779	-0.324217	0.745773
GRAP2	3.24874	0.933905	0.652295	1.43172	0.152223
PROSER3	3.37634	-0.0298933	0.516465	-0.0578807	0.953844
KCNJ9	3.13158	-0.194958	0.53073	-0.36734	0.713366
ERBB3	1.97567	-1.07614	0.582995	-1.84588	0.0649102
EIF3M	3.17691	-0.732345	0.564129	-1.29819	0.194223
SPATA31A6	2.9199	0.451572	0.591647	0.763247	0.445316
ATP5MG	3.37445	0.205896	0.598172	0.344208	0.730689
ZNF589	3.59331	-0.28913	0.499116	-0.579283	0.562398
SLC7A5	2.46588	-0.797286	0.600091	-1.32861	0.183977
EPN2	3.43652	-0.587769	0.534896	-1.09885	0.271835
PALMD	2.50567	-0.297299	0.556935	-0.533812	0.593472
NOMO3	2.75312	-0.315459	0.528885	-0.59646	0.550868
SPATA33	3.1922	-0.162609	0.522317	-0.311323	0.755555
TMEM9	3.49751	0.0962345	0.508051	0.189419	0.849765
ITGA7	2.6699	-0.429645	0.518688	-0.82833	0.407483
NDUFV3	3.17092	0.152017	0.589944	0.25768	0.796654
PHLDA3	2.43911	0.643404	0.607556	1.059	0.289598
APTX	2.86354	-0.285503	0.559234	-0.510525	0.609684
C11orf24	2.54816	-0.118528	0.53188	-0.222848	0.823654
NAT8	2.78641	0.214031	0.581102	0.368319	0.712635
SEC63	3.52215	0.00474958	0.506016	0.00938622	0.992511
ITGA6	2.13761	-0.184264	0.618638	-0.297855	0.765814
TACC1	3.34461	0.0676324	0.510469	0.132491	0.894596
PPME1	2.38934	0.0988543	0.540468	0.182905	0.854873
TSPAN9	3.00227	-0.773453	0.452485	-1.70935	0.0873868
RNH1	2.61106	-0.413957	0.568329	-0.728375	0.466384
LAMA5	3.21216	-1.16128	0.575523	-2.01778	0.0436139
SQSTM1	3.26763	-0.043719	0.615699	-0.0710071	0.943392
RNPEP	3.74038	0.415729	0.563955	0.737167	0.461021
NNAT	3.10622	0.121438	0.549573	0.220969	0.825117
EIF3G	3.35487	0.448017	0.634572	0.706014	0.480179
TNKS1BP1	3.286	-0.960369	0.507373	-1.89283	0.0583809
VAPA	3.49092	0.922176	0.633289	1.45617	0.145346
TATDN1	3.06129	0.403048	0.570257	0.706784	0.479701
AFF4	3.30923	0.311349	0.549531	0.566572	0.571005
UBXN6	3.39769	0.0313209	0.58903	0.0531736	0.957594
MLLT6	2.61853	0.224086	0.567652	0.39476	0.69302
GLUD1	2.58446	-0.3729	0.56244	-0.663004	0.507328
UBE2D2	2.54796	-0.754796	0.541843	-1.39302	0.163615
CD9	3.55985	0.0501422	0.549518	0.0912476	0.927296
BARHL2	3.17742	-0.0378503	0.548465	-0.0690113	0.944981
SARDH	3.3599	0.188578	0.551407	0.341995	0.732355
FILIP1	1.98104	-0.166108	0.616893	-0.269266	0.787725
CASQ1	1.92002	0.463709	0.648327	0.71524	0.474461
SRPK3	1.88454	-0.509334	0.592043	-0.8603	0.389624
ARHGAP23	2.48059	-0.00692987	0.600862	-0.0115332	0.990798
PDIA6	3.77877	-0.89561	0.511036	-1.75254	0.0796817
DLD	2.26057	0.0563935	0.585003	0.0963987	0.923204
CRTC1	3.67814	-0.319765	0.495902	-0.644815	0.519047
EMC1	2.81007	0.604448	0.585598	1.03219	0.301983
CCDC9	2.27992	0.522613	0.615745	0.84875	0.396021
SRF	2.75328	-0.343589	0.535197	-0.641986	0.520882
IGDCC4	3.11056	0.429088	0.561155	0.764651	0.444479
RBM42	3.53001	0.756584	0.622669	1.21507	0.224341
KHDRBS1	3.55811	-0.554109	0.518672	-1.06832	0.285375
FAM180B	3.5558	-0.6815	0.459768	-1.48227	0.138269
FGF11	3.68787	0.859421	0.569758	1.5084	0.131453
SULF1	3.53387	0.546939	0.505969	1.08097	0.279709
AZIN1	2.65854	-0.0735549	0.572555	-0.128468	0.897779
CCT3	2.92907	-0.803303	0.492075	-1.63248	0.102578
MBNL2	2.86181	-0.0965149	0.539241	-0.178983	0.857951
EIF3D	3.23571	0.0602021	0.639426	0.0941501	0.92499
LMOD2	2.01399	0.626553	0.650357	0.963399	0.335347
ISL2	1.89441	-0.527808	0.614042	-0.859564	0.39003
NOTCH2NLA	3.7786	-0.530302	0.511127	-1.03751	0.299496
GPI	2.90164	-0.628815	0.538417	-1.1679	0.242848
KDM7A	2.95573	0.276953	0.518509	0.534134	0.593249
BTG1	2.99207	0.120134	0.554493	0.216656	0.828477
NCS1	3.36094	-0.0973948	0.508417	-0.191565	0.848083
EXOC7	3.63291	-0.6657	0.538835	-1.23544	0.216665
MRPL52	3.5414	0.488046	0.576126	0.847117	0.39693
PRPF38B	3.49535	0.0125624	0.509805	0.0246417	0.980341
PPP5C	3.74418	-0.205897	0.474856	-0.433599	0.664579
ZFP57	3.41315	-0.192881	0.489947	-0.393677	0.693819
CTSZ	3.7074	0.347375	0.500683	0.693802	0.487806
ATF7IP	3.21317	0.455622	0.557586	0.817133	0.413852
ACBD3	2.80964	0.145346	0.606151	0.239785	0.810497
TOM1	2.45812	0.294023	0.620531	0.473825	0.635625
BBS2	3.29914	-0.0551753	0.509037	-0.108392	0.913685
PARVA	3.13858	0.345781	0.580587	0.595571	0.551462
FARSA	2.8353	-0.103963	0.57481	-0.180864	0.856474
RTRAF	3.56799	-0.129385	0.53152	-0.243425	0.807676
ERGIC3	3.58826	0.399629	0.577408	0.692109	0.488869
CLDN11	3.0798	0.41667	0.600435	0.693947	0.487716
C22orf23	3.1212	-0.0196948	0.522656	-0.037682	0.969941
CALM2	3.79948	-0.0548578	0.512723	-0.106993	0.914795
PRR5	2.60616	0.477164	0.556837	0.856918	0.39149
SEC61A1	3.64357	-0.463834	0.533836	-0.86887	0.384918
ZMIZ2	3.58173	0.06571	0.531277	0.123683	0.901566
TCIM	3.29079	0.25086	0.539278	0.465177	0.641804
WLS	3.09411	-0.242379	0.547713	-0.44253	0.658106
DSN1	2.54842	-0.772611	0.546648	-1.41336	0.157549
CHD3	3.67683	-0.759492	0.497216	-1.52749	0.126639
ATP5IF1	2.99482	-0.465743	0.576291	-0.808172	0.418991
OR2A25	3.10751	-0.277713	0.498374	-0.557238	0.577365
NEFM	2.35448	0.138161	0.592004	0.233379	0.815467
MYO18B	2.00135	-0.160568	0.595323	-0.269716	0.787379
GPAT4	3.73637	0.459326	0.536909	0.855501	0.392274
SAA2	3.45896	-0.130573	0.501095	-0.260575	0.79442
SSB	3.34301	-0.73882	0.501148	-1.47425	0.140413
SYNM	2.60779	0.31607	0.578157	0.546685	0.584595
GORASP2	3.65415	-0.130565	0.517955	-0.252078	0.80098
PGRMC2	2.84104	-0.0849534	0.595529	-0.142652	0.886565
ULK1	3.13883	-0.58641	0.501345	-1.16967	0.242133
OAZ2	3.15317	-0.294615	0.550016	-0.535648	0.592202
PREX2	2.85639	0.0941663	0.565745	0.166447	0.867805
KLHDC4	2.24005	1.15378	0.750939	1.53645	0.124428
SDCBP2	3.59706	0.108793	0.520722	0.208927	0.834506
DOT1L	3.40364	-0.382736	0.468123	-0.817597	0.413587
NDUFB8	3.74896	0.150027	0.569909	0.263248	0.792359
NFYC	3.23321	-0.617768	0.499286	-1.2373	0.215975
YTHDF3	3.20428	-0.814074	0.49161	-1.65593	0.097735
ALDH1B1	2.12557	0.210061	0.654752	0.320825	0.748343
GALNT18	2.81084	0.713099	0.57951	1.23052	0.218503
PTGES3	3.1734	-0.648397	0.526932	-1.23051	0.218505
EML2	3.36552	0.191576	0.495576	0.386573	0.699072
MDH2	2.9299	-0.0989678	0.60785	-0.162816	0.870663
CDC42EP3	2.19757	0.48552	0.639659	0.75903	0.447835
STAT3	2.9751	-0.0804251	0.536501	-0.149907	0.880838
RBBP4	2.93403	-0.990864	0.542703	-1.82579	0.0678815
FERMT2	2.94944	-0.525786	0.560554	-0.937975	0.348257
TNFRSF6B	3.02712	0.0483755	0.600369	0.0805763	0.935779
WDR26	2.90961	-0.0204522	0.549726	-0.0372043	0.970322
SEL1L	2.97238	0.0308365	0.545807	0.056497	0.954946
SLC25A11	2.79534	0.749099	0.670557	1.11713	0.263939
ALG2	3.59497	-0.394008	0.519471	-0.758479	0.448164
COL9A2	3.06455	-0.651979	0.54108	-1.20496	0.228219
SPC24	3.13482	-0.209817	0.466084	-0.45017	0.652588
CTDNEP1	3.20697	-0.133595	0.501004	-0.266655	0.789735
PPP1R12B	2.78264	1.04685	0.697277	1.50133	0.133269
CCL8	2.69426	0.823308	0.587592	1.40115	0.161168
KRTAP19-1	3.28084	-0.107151	0.531435	-0.201626	0.840209
HSPB7	2.00411	0.579165	0.641629	0.902647	0.366713
CAMKK1	2.69605	0.416886	0.617927	0.674652	0.499897
KRT12	3.67619	-0.400768	0.492161	-0.814302	0.415472
RAB5C	3.28987	0.214836	0.535416	0.401251	0.688235
SCRN1	2.96862	-0.0988192	0.504951	-0.1957	0.844845
CSNK1E	3.53093	0.47542	0.529516	0.897839	0.369271
TRIM72	3.40681	0.591037	0.687628	0.85953	0.390048
TMBIM6	3.38665	0.345989	0.539552	0.641253	0.521358
PPP3R2	1.46768	-0.563971	0.734055	-0.768296	0.442312
FBXW12	3.43445	0.198659	0.582757	0.340894	0.733183
ASB5	1.91699	-0.434291	0.615346	-0.705768	0.480333
ACSL4	3.45901	0.199349	0.54614	0.365014	0.715101
TRAM2	3.10621	0.122921	0.587309	0.209295	0.834218
IREB2	3.1697	0.323785	0.543075	0.596208	0.551037
KIAA0754	3.32641	-0.244867	0.541873	-0.45189	0.651348
KLHL40	2.31821	0.348454	0.566039	0.6156	0.538158
C1QBP	2.8334	-0.650535	0.549505	-1.18386	0.23647
TNS1	2.34034	-0.145659	0.561354	-0.259478	0.795266
KLF5	1.89394	-0.528781	0.609128	-0.868096	0.385342
AFG3L2	3.16462	-0.237691	0.569112	-0.417653	0.676201
WDFY4	2.88936	0.0116248	0.542559	0.0214259	0.982906
GPAT2	3.70806	0.6288	0.582051	1.08032	0.280001
EZR	3.52144	-0.548608	0.542671	-1.01094	0.312045
TP53RK	2.76222	-0.0513216	0.537531	-0.0954765	0.923936
SART1	3.36087	0.355941	0.566925	0.627846	0.530105
MYPN	1.8066	0.718619	0.694396	1.03488	0.300723
JAM2	2.19025	0.452744	0.641346	0.705928	0.480233
IFITM3	3.58755	-0.0152554	0.588647	-0.025916	0.979324
LUC7L2	3.43826	0.473808	0.57503	0.823971	0.409956
VDAC3	2.34145	0.0976175	0.610828	0.159812	0.873029
COX4I1	3.24911	0.0994996	0.627727	0.158508	0.874057
FEM1B	2.52702	0.261564	0.602584	0.434071	0.664237
MYMK	2.27335	0.472422	0.579568	0.815127	0.415
SKIL	3.20384	-1.06585	0.548406	-1.94353	0.0519518
PSKH2	3.18525	0.167603	0.537385	0.311886	0.755127
PSD	2.99462	-0.146921	0.51607	-0.284693	0.77588
POM121C	3.68468	-0.683784	0.488176	-1.40069	0.161306
FBXO10	2.5353	-0.559589	0.572771	-0.976986	0.328576
ARHGAP9	3.7571	-0.406987	0.468156	-0.869339	0.384661
DLL1	2.38948	-0.910419	0.53328	-1.70721	0.0877836
OLA1	3.14801	-0.178201	0.543094	-0.328123	0.742819
SBDS	2.49965	-0.232823	0.532822	-0.436962	0.662139
CDH13	2.68227	-0.929836	0.553137	-1.68102	0.0927581
PSMA1	3.28575	-0.858603	0.554414	-1.54867	0.121462
DPYSL3	3.3736	-0.976298	0.499734	-1.95364	0.0507443
POTEG	3.60417	-0.761389	0.478113	-1.59249	0.111275
KIAA1143	2.68258	0.439139	0.559307	0.785147	0.432367
VPS28	2.78948	-0.157258	0.560764	-0.280436	0.779143
WNT8A	3.10898	-0.423688	0.494911	-0.85609	0.391948
DUSP1	3.0829	1.35192	0.661869	2.04258	0.0410936
DDX3X	2.96745	-0.129386	0.598166	-0.216304	0.828751
QRICH1	3.53301	1.3444	0.5461	2.46182	0.0138236
C4orf54	2.6541	0.167404	0.545582	0.306836	0.758968
MAP2K1	1.85846	-0.287761	0.59302	-0.485247	0.627501
TMEM109	2.56114	-0.0286437	0.604329	-0.0473975	0.962196
UBE2K	3.11186	-0.393744	0.527362	-0.746629	0.455288
CAMK4	3.46318	-0.105488	0.520984	-0.202479	0.839542
SPN	2.7259	-0.570343	0.526571	-1.08313	0.278752
AVPR1B	2.82732	-0.799911	0.519896	-1.5386	0.123903
CDK11A	2.78065	-0.00795323	0.540756	-0.0147076	0.988265
TNIP1	2.21	0.177756	0.657899	0.270188	0.787016
RNF11	2.11718	-0.386628	0.580894	-0.665574	0.505683
COQ10A	2.02484	-0.370116	0.581442	-0.636548	0.524419
CLK1	3.69884	0.823008	0.565339	1.45578	0.145454
RPL7L1	3.28619	-0.554779	0.535105	-1.03677	0.299845
TUFM	3.34815	-0.251881	0.57031	-0.441656	0.658738
RANGRF	3.52052	-1.27135	0.518463	-2.45216	0.0142001
TMEM248	3.61577	-0.71694	0.519217	-1.38081	0.167337
NHP2	3.04706	0.185523	0.599934	0.309239	0.75714
TRIM21	2.90477	0.326245	0.604289	0.539882	0.589278
CCDC153	2.13862	-0.327094	0.649839	-0.503346	0.614721
PDLIM5	2.3898	-0.241399	0.557208	-0.433229	0.664848
IRF2BP2	2.95201	-0.216402	0.56959	-0.379926	0.704
ARSK	2.03544	-0.677446	0.586243	-1.15557	0.247856
DBNL	3.21065	0.206681	0.537768	0.384332	0.700733
IDH3A	2.57403	-0.400777	0.56757	-0.706129	0.480108
KCNJ12	3.42733	0.048786	0.518703	0.0940539	0.925066
NMRK2	2.12376	0.692656	0.657302	1.05379	0.29198
VAMP1	3.14103	0.363226	0.573717	0.633109	0.526662
VTA1	2.81827	-0.246495	0.547983	-0.449823	0.652838
AMELX	3.16391	-0.161658	0.509613	-0.317218	0.751078
ADGRL2	3.27157	0.337138	0.578772	0.582505	0.560227
CASZ1	3.55739	2.06307	0.749908	2.7511	0.00593958
SLC2A3	3.46609	-0.261197	0.569818	-0.458387	0.646675
RAP1B	3.16621	-0.204173	0.55882	-0.365364	0.714839
SDF4	2.79446	0.0556805	0.57691	0.096515	0.923112
CTNND1	3.06116	-0.0406306	0.5481	-0.0741299	0.940907
DYSF	1.67993	-0.0114601	0.674061	-0.0170016	0.986435
PHETA1	3.03271	-0.150918	0.552637	-0.273088	0.784786
EFEMP2	3.5089	0.135398	0.542047	0.24979	0.80275
S100A1	2.66774	0.925284	0.58067	1.59348	0.111053
LVRN	2.4356	-1.0956	0.577736	-1.89636	0.0579124
SMARCA5	2.87446	-0.269101	0.534727	-0.50325	0.614789
KIAA2013	3.76678	-0.698937	0.534041	-1.30877	0.190612
KYNU	3.05769	-0.277444	0.508192	-0.545944	0.585105
ZC3H11A	2.87034	-0.574163	0.55321	-1.03788	0.299328
CREB3L1	3.25526	0.0169648	0.622867	0.0272366	0.978271
C1QB	3.13774	0.928446	0.545139	1.70314	0.0885424
ZNF655	2.93743	-0.0791257	0.582716	-0.135788	0.891989
SLC4A4	3.22304	0.282099	0.512876	0.550033	0.582297
AGPAT5	2.08846	-0.204252	0.591397	-0.345372	0.729815
KLHDC3	2.86954	0.138893	0.530229	0.261949	0.79336
MGP	3.28986	-0.417953	0.596942	-0.700157	0.483829
SLC25A52	3.62969	-0.177924	0.490265	-0.362915	0.716668
SNHG32	3.64485	-0.397929	0.474236	-0.839094	0.401416
RIN1	2.57767	0.439481	0.604398	0.727139	0.467141
IMPDH1	2.9172	0.403043	0.538099	0.749012	0.45385
SNRPD2	3.35816	-0.290352	0.579319	-0.501196	0.616233
BBS1	3.01485	-0.459755	0.530598	-0.866485	0.386224
FHL3	3.44326	0.284137	0.655692	0.433339	0.664769
IGFBP7	2.49442	-0.313671	0.56139	-0.558739	0.57634
C5orf51	3.44226	-0.13783	0.50604	-0.272369	0.785338
IPO7	3.23144	0.3489	0.557585	0.625734	0.531489
PPIAL4F	2.64921	0.102339	0.595993	0.171712	0.863664
AKAP1	2.8713	-0.487594	0.494185	-0.986663	0.323808
CCT2	2.48056	-0.455742	0.549073	-0.830021	0.406527
AKIRIN2	2.60665	0.150893	0.583594	0.258557	0.795977
ATP1B4	1.9706	0.661682	0.657607	1.0062	0.314321
ATP6V0B	3.49133	-0.397168	0.495176	-0.802076	0.422509
CTSS	3.45092	0.951052	0.511289	1.86011	0.0628704
FST	2.41008	0.585388	0.692025	0.845906	0.397605
SLC25A26	3.32613	-0.623088	0.586137	-1.06304	0.287763
SEC14L1	3.5594	-0.0813164	0.566856	-0.143452	0.885934
C1S	3.16236	0.857525	0.57618	1.48829	0.136673
SAE1	3.01734	-0.557516	0.524184	-1.06359	0.287515
ADD1	3.47428	0.709511	0.58031	1.22264	0.221466
CUL3	3.0412	0.53957	0.600261	0.898893	0.36871
NDUFA4	2.86122	0.407067	0.601065	0.677242	0.498252
PKIA	2.28054	-0.286195	0.582688	-0.491164	0.623311
TRIM6	3.50282	-0.26381	0.533178	-0.494787	0.620751
TMEM11	3.12798	-0.281679	0.492039	-0.572473	0.567002
CCL25	1.43556	-0.908916	0.722293	-1.25838	0.208256
CLINT1	3.10497	0.182508	0.553055	0.33	0.7414
RCC1L	3.42172	0.082907	0.582752	0.142268	0.886868
EFR3B	3.03157	-0.899352	0.546617	-1.64531	0.0999068
TSPAN33	1.81651	-0.0913437	0.646461	-0.141298	0.887634
ZNF787	2.82022	-0.131108	0.516603	-0.253789	0.799659
PPP1R15A	2.23163	0.38686	0.611011	0.633147	0.526638
CNOT3	3.45302	0.621654	0.554133	1.12185	0.261927
INPP4B	2.11461	0.315753	0.606713	0.520432	0.602763
ALKBH5	2.67054	-0.153963	0.548268	-0.280818	0.77885
ERGIC1	3.31236	0.112669	0.623027	0.180841	0.856493
NDUFB6	2.44481	0.258656	0.656658	0.393897	0.693657
COX7A2	2.58977	-0.34764	0.545625	-0.637141	0.524033
ATP6AP2	3.32469	-0.716638	0.503605	-1.42302	0.154731
REEP5	2.48172	0.581285	0.580259	1.00177	0.316456
ZDHHC11	3.21258	0.386271	0.588575	0.656282	0.511643
RPS6KB2	3.2309	-0.227755	0.525727	-0.433219	0.664856
ACAD9	3.22647	-0.872909	0.463929	-1.88156	0.059896
MICOS10	2.81257	-0.409065	0.54928	-0.74473	0.456435
THBS1	2.81762	0.240799	0.604012	0.398666	0.690139
BRD2	3.36284	-0.334148	0.519747	-0.642905	0.520286
TAOK3	2.63687	1.02228	0.739371	1.38263	0.166777
TOMM7	3.39375	-0.480155	0.59928	-0.801219	0.423005
ELL	2.55172	-1.35013	0.577548	-2.3377	0.019403
MAGOH	3.77966	-0.888431	0.530686	-1.67412	0.0941076
GPRC5C	2.75098	0.57798	0.608552	0.949763	0.342233
CCDC97	3.79767	0.452547	0.62225	0.727275	0.467057
PDHX	3.29735	-0.68954	0.496737	-1.38814	0.165094
GHITM	2.68588	-0.168178	0.614798	-0.273549	0.784431
SYPL1	2.61728	-0.245658	0.539831	-0.455066	0.649062
PICALM	2.98757	-0.29219	0.526851	-0.554596	0.579171
HNRNPAB	3.71015	-0.0019037	0.563848	-0.00337625	0.997306
CMYA5	2.08646	1.01787	0.691743	1.47146	0.141166
BARX2	2.27244	1.1912	0.704401	1.69109	0.0908199
ATP5MJ	3.70337	0.3948	0.496009	0.795952	0.42606
PPP1CA	2.9959	0.117748	0.566888	0.207709	0.835456
HIF1A	3.28208	0.270239	0.626047	0.43166	0.665989
ZNF516	3.73242	0.580095	0.535611	1.08305	0.278785
YY1AP1	3.52863	0.93911	0.633019	1.48354	0.137931
MAP3K7CL	2.40984	0.0411789	0.596268	0.069061	0.944941
MAP3K7	2.6536	0.216816	0.578391	0.374861	0.707764
MSI2	2.29948	0.743632	0.651726	1.14102	0.253862
RNF19B	2.23358	0.288312	0.651813	0.442323	0.658256
SPPL3	2.62807	0.0729658	0.561971	0.129839	0.896694
USP18	2.46735	0.808848	0.691431	1.16982	0.242075
INF2	3.07291	0.0760621	0.532597	0.142814	0.886437
CHCHD10	2.00549	0.19969	0.627447	0.318258	0.75029
MARCHF3	3.69736	0.103287	0.5205	0.198437	0.842703
RAB12	2.96502	0.0330218	0.531893	0.0620835	0.950496
MTX2	3.17822	0.444579	0.552767	0.804279	0.421236
KIRREL3	3.51358	-0.225074	0.487476	-0.461712	0.644288
DEXI	2.67908	0.0705123	0.567611	0.124226	0.901136
NAT9	3.1022	0.143778	0.551728	0.260595	0.794405
SNX19	2.57877	-0.728454	0.57738	-1.26165	0.207073
CLDN7	2.25277	0.923348	0.650222	1.42005	0.155593
STARD7	3.7099	-0.925449	0.52537	-1.76152	0.0781504
MDFI	3.55862	0.948784	0.631077	1.50344	0.132727
AP2A1	2.61362	0.118566	0.579421	0.204628	0.837863
SEPTIN4	1.74849	-0.146111	0.654683	-0.223178	0.823397
ACTR2	3.01787	-0.710613	0.560589	-1.26762	0.204934
OGA	3.75308	0.143072	0.577528	0.247732	0.804342
USF2	3.07556	-0.646219	0.502535	-1.28592	0.198471
SNRNP200	3.45545	0.186123	0.538962	0.345336	0.729842
MICALL1	3.04197	-0.236657	0.509557	-0.464436	0.642335
ZBTB18	2.43351	0.129301	0.573376	0.225507	0.821585
EPB41L3	2.21593	0.63346	0.631862	1.00253	0.316088
LAMP1	2.98243	0.0314537	0.563377	0.0558307	0.955477
TMEM47	3.22107	0.339165	0.56913	0.595937	0.551217
NDUFB5	3.16532	-0.952929	0.509956	-1.86865	0.0616719
MBP	3.34304	-0.239803	0.493385	-0.486037	0.626941
TCAF1	3.02378	-0.115988	0.543373	-0.213458	0.83097
GNB4	2.84032	0.436602	0.560676	0.778707	0.436152
XIRP1	1.9137	0.0706529	0.65438	0.107969	0.91402
KIAA0100	3.67208	0.0446614	0.500652	0.0892065	0.928918
RAF1	2.59529	0.149489	0.592978	0.252099	0.800964
VASP	2.23938	-0.391491	0.718177	-0.545118	0.585672
PLEKHO1	3.10348	0.0586793	0.587915	0.0998091	0.920496
NAP1L4	3.67465	-0.206861	0.488755	-0.423241	0.672119
OS9	2.99252	-0.339453	0.520334	-0.652374	0.51416
CACNG1	3.01914	-0.290889	0.542613	-0.536089	0.591897
USE1	2.67827	0.784698	0.61191	1.28237	0.199712
CAT	1.8923	0.0799735	0.632972	0.126346	0.899458
PRPF19	2.45961	0.712831	0.613513	1.16188	0.245283
PSMC3	2.89853	0.285131	0.567818	0.502153	0.61556
IRGC	3.14239	-0.268301	0.543235	-0.493895	0.62138
COPS6	2.79139	0.187233	0.624843	0.299647	0.764446
TIMM23B	3.45318	-0.17143	0.500093	-0.342797	0.731751
ILK	2.64891	0.25829	0.655351	0.394124	0.693489
MLF2	2.8793	0.287325	0.602059	0.477238	0.633193
RSRP1	3.78776	0.539536	0.546318	0.987586	0.323355
RUSC2	2.6033	0.889831	0.63229	1.40731	0.159334
FXR2	2.97977	-0.264264	0.584151	-0.45239	0.650988
TMEM182	2.20219	0.745716	0.604936	1.23272	0.217681
PSD2	2.123	-0.0693112	0.591838	-0.117112	0.906771
C1QTNF1	2.32646	-0.997225	0.561425	-1.77624	0.0756934
CSRP3	2.57361	0.201642	0.549135	0.367199	0.713471
NR1H3	3.02937	0.104878	0.494733	0.211988	0.832116
DCAF12	2.74264	-0.408009	0.502294	-0.81229	0.416625
SLC3A2	3.09383	-0.237943	0.593456	-0.400945	0.688461
NRDC	3.25391	-0.270084	0.526188	-0.513284	0.607752
ZEB1	3.41722	0.550611	0.514879	1.0694	0.28489
EIF3J	3.03617	0.0885006	0.52052	0.170024	0.864992
ZSCAN16	3.49138	-0.918673	0.470934	-1.95075	0.0510869
HEY2	3.7309	-0.176118	0.538027	-0.32734	0.743411
KLC3	3.40726	-0.0664416	0.493472	-0.134641	0.892896
PAK4	2.77279	0.184964	0.504376	0.366717	0.71383
SNU13	3.61654	-0.516405	0.541446	-0.953752	0.340209
UTP11	2.8586	0.731086	0.627187	1.16566	0.243753
AXL	2.79345	0.881522	0.589285	1.49592	0.134675
ISCU	2.56839	0.663574	0.63606	1.04326	0.29683
ZSCAN25	2.2308	0.628148	0.603364	1.04108	0.29784
DVL3	3.30425	0.555596	0.578955	0.959654	0.33723
GOLGA4	3.5565	-0.144157	0.56367	-0.255747	0.798147
ELAVL1	3.21409	-0.458419	0.51497	-0.890186	0.373366
SMARCA2	3.22852	0.681804	0.531687	1.28234	0.199723
GSTM3	3.23806	0.387671	0.556344	0.696817	0.485917
NDUFB9	2.50305	-0.0603226	0.575149	-0.104882	0.91647
C4orf17	3.15885	0.549782	0.565437	0.972313	0.330895
ARHGEF17	2.55055	0.0140487	0.611293	0.022982	0.981665
SRP68	2.78623	-0.568313	0.539146	-1.0541	0.291838
KDM2A	3.54734	0.150458	0.471065	0.319401	0.749423
YKT6	2.88007	0.290974	0.539987	0.538854	0.589988
IZUMO2	2.70047	-0.153017	0.582084	-0.262878	0.792645
SERPINA7	2.28246	1.014	0.703256	1.44187	0.149338
DNTT	3.40191	0.113446	0.541712	0.209422	0.834119
DGCR2	2.27876	-0.326447	0.59035	-0.552972	0.580282
PLP2	3.15693	0.341442	0.62624	0.545225	0.585598
DCTN2	3.08874	-0.725869	0.583579	-1.24382	0.213565
SET	3.57797	-0.917923	0.480639	-1.9098	0.0561596
FGFRL1	2.84779	-0.336557	0.51602	-0.652217	0.514261
MPC2	3.12265	0.603086	0.569872	1.05828	0.289926
PLXNA1	2.76898	0.265564	0.573673	0.462919	0.643423
DNAJB6	2.59194	-0.959614	0.518645	-1.85023	0.0642801
TMED10	3.67748	-1.0363	0.539641	-1.92035	0.0548139
[truncated: 9,412 more rows]

## Sheet: PAX7_D1_vs_D5
Gene	baseMean	log2FoldChange	lfcSE	stat	pvalue	padj
MTRNR2L10	185.845	-3.80748	0.314153	-12.1198	8.29269e-34	3.04176e-30
FN1	35.962	2.85601	0.274313	10.4115	2.1979e-25	4.03094e-22
RPS12	19.9002	2.77894	0.286725	9.69203	3.25979e-22	3.98564e-19
RPS2	18.1229	3.31075	0.352312	9.39722	5.60261e-21	5.13759e-18
RPS4X	14.2802	2.63696	0.282701	9.32773	1.08163e-20	7.93487e-18
ACTA1	69.8778	-3.66349	0.394399	-9.28881	1.56026e-20	9.53838e-18
TMSB4X	28.1046	2.85873	0.308617	9.26305	1.98677e-20	1.04107e-17
RPL27A	18.2201	2.82315	0.305407	9.24388	2.37715e-20	1.08992e-17
SPARC	37.9073	2.15748	0.23775	9.07458	1.1412e-19	4.65101e-17
S100A6	16.5612	3.50334	0.389585	8.99249	2.4169e-19	8.86518e-17
RPL9	14.5408	2.69906	0.302601	8.91954	4.68238e-19	1.56136e-16
RPS17	16.969	3.02685	0.340007	8.9023	5.46989e-19	1.67196e-16
TUBA1C	45.3326	2.32409	0.267566	8.68604	3.75288e-18	9.83255e-16
PTMA	20.6314	2.56766	0.295355	8.69346	3.51568e-18	9.83255e-16
RPL37	14.1114	2.92155	0.339557	8.60401	7.69788e-18	1.88239e-15
RPL37A	26.6043	2.76357	0.325365	8.49377	2.00033e-17	4.58576e-15
RPL41	20.6293	2.50923	0.298634	8.40236	4.37599e-17	9.44184e-15
MYH9	16.781	2.2383	0.267428	8.36971	5.77585e-17	1.17699e-14
RPS24	19.0924	2.65318	0.317652	8.35248	6.68457e-17	1.29047e-14
RPS8	21.789	2.44309	0.293882	8.31318	9.31697e-17	1.62736e-14
LGALS1	17.1617	2.84941	0.342616	8.3166	9.05194e-17	1.62736e-14
RPL7	14.5463	2.36108	0.284766	8.29129	1.12029e-16	1.86783e-14
RPL28	10.7092	2.91301	0.359164	8.11052	5.04031e-16	8.0382e-14
RPS19	9.24731	2.75644	0.342771	8.04164	8.86411e-16	1.35473e-13
RPL10A	15.2532	2.63755	0.329067	8.01524	1.09921e-15	1.61277e-13
RPL13	11.1804	2.72378	0.343897	7.92033	2.36879e-15	3.34182e-13
CD63	16.3625	2.51527	0.320457	7.84901	4.19337e-15	5.69677e-13
NPM1	12.6708	2.26287	0.290378	7.79284	6.55181e-15	8.58287e-13
RPLP1	10.4374	2.64467	0.340177	7.77439	7.5811e-15	9.58879e-13
TGFBI	10.3778	2.75892	0.35595	7.75087	9.12683e-15	1.11591e-12
RPL7A	22.4209	2.12462	0.274311	7.74529	9.53618e-15	1.12835e-12
RPL32	19.4757	2.37241	0.307808	7.70743	1.28374e-14	1.47148e-12
VIM	45.2141	1.99015	0.26021	7.64825	2.03734e-14	2.19793e-12
RPL12	9.84631	2.71033	0.35436	7.64851	2.03327e-14	2.19793e-12
TAGLN2	10.5055	2.87119	0.375974	7.63666	2.22926e-14	2.33627e-12
RPL13A	7.70779	2.73654	0.360104	7.59931	2.97714e-14	3.03338e-12
PFN1	14.2146	2.61773	0.34774	7.52785	5.15821e-14	5.1136e-12
MYH1	14.7559	-4.08329	0.545575	-7.48438	7.18847e-14	6.93877e-12
RPL15	12.6384	2.42741	0.327863	7.40373	1.32416e-13	1.24539e-11
RPS28	16.1402	2.30206	0.312019	7.37793	1.60765e-13	1.47422e-11
RPL31	10.9703	2.60245	0.352946	7.37349	1.66218e-13	1.48704e-11
RPL26	12.6526	2.44331	0.333978	7.31579	2.55875e-13	2.23464e-11
TMSB10	27.4251	2.23409	0.307212	7.27212	3.53886e-13	3.01873e-11
RPS20	11.9329	2.6373	0.366471	7.19649	6.17845e-13	5.13208e-11
RPL22	10.1466	2.65188	0.368628	7.19391	6.29617e-13	5.13208e-11
IGF2	100.513	2.1124	0.295413	7.15066	8.63642e-13	6.88661e-11
RPL29	13.6267	2.58965	0.362625	7.1414	9.23836e-13	7.20985e-11
MAGED1	10.2357	2.12117	0.297845	7.12174	1.06569e-12	8.14367e-11
RPL4	20.3102	2.11692	0.29766	7.11185	1.14499e-12	8.57104e-11
MYL1	17.5207	-3.08661	0.434717	-7.10027	1.24516e-12	9.13448e-11
TPI1	10.9357	2.14744	0.304571	7.05069	1.78037e-12	1.28047e-10
RPL6	19.2468	2.10702	0.299968	7.02414	2.15387e-12	1.51931e-10
PPIA	13.3978	2.33529	0.334174	6.98825	2.78339e-12	1.92632e-10
RPS14	15.6898	2.42155	0.347139	6.97574	3.04257e-12	2.06669e-10
RPS3A	19.5974	2.25179	0.326734	6.89183	5.50798e-12	3.60773e-10
ANXA2	8.24258	2.40183	0.348493	6.89205	5.49958e-12	3.60773e-10
RPS18	7.86669	2.30081	0.338429	6.79851	1.05707e-11	6.80236e-10
MDK	8.32857	2.27037	0.335319	6.77078	1.28093e-11	8.10078e-10
RPL38	11.7159	2.0594	0.305977	6.7306	1.6897e-11	1.05048e-09
TPM4	9.99579	1.98516	0.29557	6.71638	1.86291e-11	1.13886e-09
HNRNPA1	25.3279	1.92116	0.286237	6.71178	1.92271e-11	1.15615e-09
NME2	8.30825	2.29773	0.344568	6.66845	2.58516e-11	1.52941e-09
RPL35	15.3354	2.0659	0.310764	6.6478	2.97502e-11	1.73212e-09
RPS3	14.6945	2.38791	0.360747	6.61934	3.60815e-11	2.06792e-09
MXRA8	6.88721	2.14635	0.3257	6.58996	4.39949e-11	2.48266e-09
RPL17	18.9541	2.02709	0.309572	6.54803	5.83004e-11	3.24009e-09
RACK1	10.0564	2.20282	0.337085	6.53492	6.36425e-11	3.48419e-09
HSPA8	7.83227	2.29942	0.354421	6.48783	8.7083e-11	4.63288e-09
OLFML2A	7.60257	2.49353	0.384347	6.48771	8.71507e-11	4.63288e-09
RPLP2	11.0551	2.17974	0.338317	6.44289	1.17218e-10	6.14221e-09
SERF2	5.14297	2.78282	0.432308	6.43713	1.21751e-10	6.28991e-09
EEF1G	15.0495	1.96432	0.305292	6.43424	1.24092e-10	6.3218e-09
TNFAIP8	10.637	-2.80562	0.436483	-6.42778	1.2948e-10	6.5059e-09
RPS11	11.1521	2.17958	0.341207	6.38785	1.68233e-10	8.33892e-09
DUX5	51.4859	1.58616	0.252133	6.29095	3.15526e-10	1.54313e-08
FTH1	19.2852	1.84478	0.293565	6.28405	3.29862e-10	1.59202e-08
TIMP1	6.91745	2.20398	0.351974	6.26176	3.8065e-10	1.81328e-08
RPL30	14.0515	2.17439	0.347699	6.25364	4.0099e-10	1.88568e-08
RPL34	16.1299	1.66342	0.266152	6.2499	4.10713e-10	1.90696e-08
MYH3	37.5952	-2.56059	0.410539	-6.23713	4.45667e-10	2.04338e-08
MARCKSL1	9.99256	2.14416	0.343893	6.23498	4.51841e-10	2.04612e-08
GNB2	6.3373	2.53714	0.411528	6.16516	7.041e-10	3.14956e-08
CAV1	7.39312	2.3523	0.382149	6.15545	7.48654e-10	3.30851e-08
RPL14	11.6254	2.06077	0.338271	6.09206	1.11464e-09	4.86726e-08
RPS23	14.5394	2.17793	0.367251	5.93035	3.02289e-09	1.30447e-07
CTSB	5.47273	2.39006	0.404103	5.91447	3.32939e-09	1.42002e-07
RPS6	10.1433	2.04572	0.347729	5.88307	4.02723e-09	1.67862e-07
PDLIM7	11.6001	1.81484	0.30845	5.88374	4.01088e-09	1.67862e-07
PPDPF	6.0397	2.31269	0.394753	5.85858	4.66843e-09	1.92402e-07
LDHA	6.84126	2.12818	0.363898	5.8483	4.96625e-09	2.02402e-07
PLD3	8.6473	1.73361	0.297046	5.83617	5.34138e-09	2.15299e-07
COL1A1	82.4396	1.70938	0.293811	5.81795	5.95734e-09	2.35979e-07
CTHRC1	5.86895	2.30898	0.396921	5.81723	5.98312e-09	2.35979e-07
RPL39	6.29424	2.12351	0.367027	5.7857	7.22098e-09	2.81772e-07
HNRNPC	7.94706	2.05123	0.354758	5.78204	7.38e-09	2.84946e-07
TAGLN3	5.32128	2.20108	0.383209	5.74381	9.25698e-09	3.53694e-07
LENG8	17.2808	1.57846	0.275339	5.7328	9.87852e-09	3.7355e-07
RPL19	19.2383	1.8034	0.316121	5.70477	1.16497e-08	4.36032e-07
ANXA5	6.78573	1.99136	0.352126	5.65526	1.55612e-08	5.76549e-07
H4C5	7.88628	2.07619	0.367647	5.64725	1.6303e-08	5.97995e-07
S100A11	6.32288	2.23116	0.397946	5.6067	2.06225e-08	7.48945e-07
RPL8	7.56162	1.97208	0.356039	5.53895	3.04285e-08	1.09423e-06
RPL36A	7.76564	1.95428	0.353188	5.53325	3.14342e-08	1.11942e-06
CRABP2	7.31622	1.71582	0.310886	5.51914	3.40659e-08	1.20148e-06
SULF2	4.65118	2.23882	0.407183	5.49831	3.83455e-08	1.33954e-06
HGF	13.1954	1.48148	0.269573	5.49567	3.89221e-08	1.34685e-06
CFL1	6.34772	1.92843	0.352053	5.47767	4.30954e-08	1.47733e-06
IGFBP5	16.8756	1.61563	0.295329	5.47062	4.48477e-08	1.52316e-06
RPL5	14.9901	1.54904	0.2857	5.42191	5.89651e-08	1.98426e-06
ACTA2	11.5407	-2.34232	0.432418	-5.4168	6.06768e-08	2.02329e-06
FKBP10	12.0428	1.72919	0.321187	5.38376	7.29462e-08	2.41051e-06
NAP1L1	11.195	1.64847	0.306757	5.37387	7.70655e-08	2.5239e-06
HMGA1	4.57668	2.51844	0.469293	5.36645	8.0301e-08	2.60659e-06
MYH8	6.33483	-2.9112	0.543761	-5.35382	8.61158e-08	2.77081e-06
RPS27A	9.72879	1.79906	0.336219	5.35087	8.75326e-08	2.77455e-06
SLC25A6	5.25741	2.07538	0.387891	5.35043	8.77448e-08	2.77455e-06
ATP5PD	4.44751	2.13816	0.401632	5.32368	1.01688e-07	3.18795e-06
RPS13	7.93887	2.02425	0.382078	5.298	1.17076e-07	3.63927e-06
CLIC1	5.15856	1.98076	0.375108	5.28051	1.28822e-07	3.97074e-06
TNNC2	12.9939	-2.09702	0.397518	-5.27529	1.32548e-07	4.05157e-06
BGN	8.77469	1.57275	0.29873	5.2648	1.4034e-07	4.25429e-06
EIF3C	9.16454	1.76695	0.33744	5.23634	1.63791e-07	4.92446e-06
PTBP1	30.0458	1.43964	0.275653	5.22265	1.7638e-07	5.25985e-06
SDC2	5.24301	2.10132	0.403243	5.21104	1.87784e-07	5.55478e-06
H3-3A	6.67466	1.94297	0.375696	5.17165	2.3204e-07	6.80897e-06
GCNT2	5.19475	-2.74299	0.53085	-5.16716	2.37678e-07	6.91909e-06
RPL23	7.10153	2.11119	0.408964	5.16229	2.43947e-07	7.04564e-06
TNNT3	8.91055	-2.02763	0.396319	-5.11615	3.11841e-07	8.9362e-06
RPL18	15.8254	1.89356	0.371242	5.10061	3.38569e-07	9.62691e-06
MYADM	9.34921	1.78223	0.350208	5.08906	3.5984e-07	1.0153e-05
RPL36	6.63964	1.93189	0.381409	5.06515	4.08079e-07	1.13396e-05
RPS4Y1	5.31967	1.96329	0.38755	5.0659	4.06485e-07	1.13396e-05
COL6A3	14.1071	1.49256	0.294858	5.06196	4.14965e-07	1.14443e-05
PYGB	3.61538	2.33005	0.460957	5.05481	4.30812e-07	1.17927e-05
FABP1	19.4791	1.28409	0.255167	5.03234	4.8454e-07	1.31651e-05
GNAI2	6.38827	1.68714	0.336486	5.01399	5.33121e-07	1.43786e-05
TNNI2	14.3113	-2.03051	0.405243	-5.0106	5.42603e-07	1.44573e-05
RPSA	11.0525	1.70214	0.33974	5.01013	5.43923e-07	1.44573e-05
RPLP0	5.61241	2.3391	0.469073	4.98665	6.14362e-07	1.62121e-05
SLC25A19	11.843	1.44646	0.290568	4.97805	6.42284e-07	1.68278e-05
COL5A1	20.7143	1.32057	0.265884	4.9667	6.81005e-07	1.77158e-05
TUBB2B	5.86851	2.01085	0.405218	4.96239	6.96315e-07	1.79865e-05
RPS9	6.52418	1.79294	0.362004	4.95283	7.31427e-07	1.87614e-05
RPS27	6.9459	1.79521	0.363087	4.94429	7.64232e-07	1.94667e-05
S100A10	7.68001	2.01137	0.407128	4.94039	7.79673e-07	1.9588e-05
SELENBP1	3.82022	2.38974	0.483711	4.94044	7.79475e-07	1.9588e-05
VKORC1	4.03686	2.08764	0.422953	4.93586	7.97979e-07	1.99115e-05
LAIR1	7.87572	1.50989	0.306043	4.9336	8.0728e-07	2.00075e-05
NACA	13.2695	1.74144	0.354769	4.90866	9.16991e-07	2.2574e-05
COL6A1	26.6217	1.42998	0.292036	4.8966	9.7511e-07	2.38447e-05
PCBP2	13.0622	1.4331	0.294568	4.86509	1.14406e-06	2.77908e-05
CD151	4.82719	1.80212	0.371337	4.85305	1.21574e-06	2.93378e-05
RPL24	8.09196	1.76214	0.36739	4.79638	1.61563e-06	3.87328e-05
AEBP1	5.67434	1.93527	0.403682	4.79405	1.63447e-06	3.89302e-05
SSR1	3.975	2.2177	0.464332	4.7761	1.78728e-06	4.22951e-05
R3HDM4	18.8015	1.31878	0.277275	4.75621	1.97262e-06	4.6382e-05
RPS10	5.44262	2.09357	0.441577	4.74113	2.1253e-06	4.96534e-05
TRAM1	3.34355	2.23383	0.472215	4.73052	2.23941e-06	5.19884e-05
TMEM106C	63.5142	1.17882	0.249598	4.72286	2.32549e-06	5.36471e-05
ITGA5	6.46058	1.84001	0.389749	4.72102	2.34667e-06	5.37975e-05
TNC	22.3309	1.82165	0.386634	4.71157	2.45812e-06	5.60024e-05
CRIP2	5.92363	1.70325	0.362929	4.69306	2.6915e-06	6.09409e-05
SRSF1	11.8985	1.36512	0.294988	4.6277	3.69753e-06	8.32057e-05
ACTN2	8.31434	-2.07649	0.451183	-4.60232	4.17803e-06	9.34453e-05
CCNI	7.53925	1.65821	0.36085	4.59528	4.3217e-06	9.60726e-05
CHSY1	5.43404	1.7683	0.385308	4.58932	4.44684e-06	9.82592e-05
RNF181	4.58193	1.90129	0.414487	4.58709	4.4946e-06	9.87198e-05
CD81	5.43836	1.87169	0.409451	4.57123	4.84862e-06	0.000105235
RPS15A	6.1632	1.88149	0.411496	4.57232	4.82364e-06	0.000105235
PDLIM3	6.56314	1.67108	0.369792	4.51898	6.2138e-06	0.000134072
TTN	6.93576	-2.36264	0.524301	-4.50628	6.59752e-06	0.000141519
TUBB	6.42714	1.71964	0.382711	4.4933	7.01271e-06	0.00014955
ZFP36L1	12.8567	1.61049	0.358665	4.49023	7.11451e-06	0.000150741
RPS25	4.58794	1.81785	0.404943	4.48915	7.15074e-06	0.000150741
SPATS2L	5.7292	1.77931	0.397614	4.47496	7.64245e-06	0.000160186
CCDC102A	7.1601	-2.08377	0.46666	-4.46529	7.99611e-06	0.000165739
AP2M1	4.9848	1.7717	0.396776	4.46524	7.99778e-06	0.000165739
RTL8C	13.6585	1.53413	0.344108	4.45828	8.26206e-06	0.000170254
OST4	4.16812	1.93864	0.435149	4.45511	8.38484e-06	0.000171819
SRL	5.69294	-2.33456	0.524652	-4.44974	8.59736e-06	0.000175195
ENO1	5.11782	1.81669	0.408655	4.44552	8.76787e-06	0.000177683
CALR	10.9862	1.5843	0.358729	4.41643	1.00346e-05	0.000202235
SERBP1	10.1861	1.48578	0.336722	4.41248	1.02194e-05	0.000204834
ILF3	10.0094	1.298	0.294951	4.40074	1.07883e-05	0.000215062
H4C15	5.55485	1.78824	0.407776	4.38536	1.15793e-05	0.000229583
QARS1	5.53075	1.68129	0.384187	4.37622	1.20753e-05	0.000238129
PGD	5.3284	1.78075	0.40724	4.37274	1.22697e-05	0.00024067
RPL21	11.4895	1.73324	0.397242	4.36318	1.28186e-05	0.000250099
PFN2	4.15559	1.94513	0.447063	4.35091	1.35574e-05	0.000263114
RPL18A	7.4822	1.69213	0.39059	4.33224	1.47599e-05	0.000284943
EMP3	6.38571	1.70978	0.395129	4.32714	1.51057e-05	0.000290093
TUBB2A	4.89754	1.76986	0.41236	4.29202	1.77052e-05	0.000338242
LOXL1	5.04415	1.67085	0.389756	4.28691	1.81173e-05	0.000344323
RPN1	4.24558	2.02594	0.473426	4.27932	1.87464e-05	0.000354443
ATF4	6.16292	1.55039	0.363205	4.26865	1.96663e-05	0.000369929
DDX17	20.7525	1.1953	0.280275	4.26474	2.00136e-05	0.00037454
H2BC8	6.73944	1.79999	0.423307	4.25221	2.11672e-05	0.000394118
GABARAP	6.85744	1.69085	0.401263	4.21381	2.51103e-05	0.000465175
PXDN	7.14148	1.52391	0.362102	4.2085	2.57067e-05	0.000473829
TTYH3	16.4735	1.14094	0.271588	4.20098	2.65765e-05	0.000487414
MYL6	9.10563	1.47546	0.352258	4.18858	2.80708e-05	0.000512258
TRIO	6.5137	1.50677	0.360078	4.18456	2.85717e-05	0.000518816
EEF1B2	4.68517	1.72803	0.41349	4.17914	2.92614e-05	0.000528724
PTMS	16.8732	1.53401	0.36725	4.17701	2.95372e-05	0.00053109
S100A4	4.12493	1.73509	0.418105	4.1499	3.32619e-05	0.000595144
TCF12	6.31159	1.56124	0.376774	4.14369	3.41759e-05	0.00060853
OLFML2B	8.9928	1.6883	0.408811	4.12977	3.63134e-05	0.000643467
BTF3	9.53325	1.50794	0.365566	4.12494	3.70833e-05	0.000653949
CHD4	7.01246	1.31682	0.320148	4.11317	3.90254e-05	0.000684906
NONO	9.47431	1.37634	0.334858	4.11021	3.95297e-05	0.000690452
LDHB	5.72804	1.6077	0.391963	4.10166	4.10198e-05	0.000713084
SND1	4.30902	1.69585	0.414334	4.09295	4.25911e-05	0.000736907
MFAP4	5.48924	1.59584	0.390586	4.08577	4.39316e-05	0.000756531
RAN	5.78867	1.4779	0.362408	4.07799	4.54268e-05	0.000778624
FLNA	7.5674	1.44615	0.354947	4.07427	4.61582e-05	0.00078748
GXYLT2	5.56307	1.56084	0.384771	4.05655	4.98035e-05	0.000844038
YWHAQ	4.11252	1.63349	0.40274	4.05594	4.99336e-05	0.000844038
YWHAZ	7.73407	1.29669	0.319965	4.05259	5.06533e-05	0.000852277
NPTX2	3.64654	1.92141	0.474265	4.05135	5.09236e-05	0.000852912
PAGE5	6.6762	-1.74673	0.431892	-4.04436	5.24667e-05	0.000874763
EIF4H	6.79041	1.43312	0.35469	4.04049	5.33401e-05	0.000885301
RBM3	3.6676	1.70287	0.421662	4.03846	5.38027e-05	0.000888957
LAMA5	3.21216	1.92293	0.479058	4.01399	5.97014e-05	0.000981995
NUTF2	4.18048	1.59099	0.396836	4.0092	6.0926e-05	0.000997663
SRP14	3.99412	1.61122	0.403448	3.99363	6.50706e-05	0.0010608
EIF4A1	8.2609	1.24555	0.3122	3.98958	6.61907e-05	0.00107428
ANXA1	6.63342	1.67239	0.41971	3.98462	6.75873e-05	0.00109212
ZYX	5.10144	1.51036	0.379375	3.98118	6.85742e-05	0.0011032
RPL35A	7.20498	1.26087	0.317533	3.97085	7.16163e-05	0.00114711
GSTP1	4.94215	1.56704	0.39495	3.96769	7.25715e-05	0.00115736
HNRNPDL	11.0067	1.36514	0.344929	3.95775	7.56605e-05	0.0012014
HNRNPK	7.25246	1.45848	0.368709	3.95564	7.63285e-05	0.00120678
PARK7	4.18568	1.70961	0.432697	3.95106	7.78052e-05	0.00122485
TXN	2.6678	2.00216	0.50757	3.94459	7.99371e-05	0.00125303
SLC9A5	4.33894	-2.73182	0.694719	-3.93227	8.41484e-05	0.00131343
MXRA5	4.09516	1.57993	0.402906	3.92134	8.80584e-05	0.00136864
CRYAB	4.49904	-2.14932	0.548885	-3.91578	9.01118e-05	0.00139464
PCBP1	8.56748	1.416	0.362462	3.90661	9.35994e-05	0.00144253
DELE1	7.73205	-2.18148	0.558823	-3.90371	9.47283e-05	0.00145382
CCND2	8.8054	1.37771	0.353502	3.89731	9.7266e-05	0.00148655
PLXND1	3.41336	1.7729	0.455127	3.89539	9.8042e-05	0.00149219
CRIP1	4.79191	1.84369	0.473756	3.89165	9.95659e-05	0.00150912
PALLD	6.62839	1.38338	0.356539	3.88003	0.000104445	0.00157655
OAZ1	5.83345	1.37244	0.353841	3.8787	0.000105018	0.00157871
HDLBP	7.01384	1.40004	0.361689	3.87085	0.000108456	0.00162374
RPS7	4.54962	1.66731	0.433099	3.84972	0.000118252	0.0017632
VAT1	3.99371	1.62711	0.423351	3.8434	0.00012134	0.00180193
P4HB	5.61065	1.57548	0.410064	3.84204	0.000122014	0.00180463
DDX5	9.16842	1.38393	0.360486	3.83907	0.000123501	0.00181928
SCARB2	4.82558	1.62473	0.423513	3.83632	0.000124889	0.00182731
H4C12	5.35486	1.71679	0.447545	3.83602	0.000125042	0.00182731
HSP90B1	7.20356	1.26782	0.330607	3.83484	0.000125648	0.00182888
GALNT2	4.44	1.4936	0.390014	3.82961	0.000128347	0.00186077
KRT28	15.9688	1.0019	0.261907	3.82542	0.000130551	0.00187789
SRSF5	12.8749	1.28176	0.335028	3.82583	0.000130333	0.00187789
RPS21	5.4064	1.62171	0.426363	3.80358	0.000142618	0.00204344
MORF4L2	5.16846	1.35105	0.357117	3.78322	0.000154815	0.00220958
FAM114A1	4.15985	1.68663	0.446265	3.77943	0.000157186	0.00223473
PRSS23	3.8171	1.5768	0.418356	3.76904	0.000163879	0.00232089
LSM7	2.79512	1.93245	0.513407	3.76397	0.000167235	0.0023593
PHLDB1	4.0752	1.56576	0.418069	3.74521	0.00018024	0.00253303
COL4A2	6.73204	1.45072	0.388319	3.73591	0.000187039	0.00261854
CLVS1	4.66403	-2.4827	0.665141	-3.7326	0.000189514	0.00264311
XRCC5	5.02548	1.42219	0.381537	3.72754	0.000193361	0.00268654
ARHGEF26	5.32581	-2.87522	0.777292	-3.69902	0.000216435	0.00299579
RAB13	3.44217	1.63845	0.443775	3.69208	0.000222424	0.0030671
FAU	3.52198	1.61773	0.439778	3.67851	0.000234602	0.00322292
IRF3	4.09027	1.53166	0.4171	3.67216	0.000240509	0.00328734
GPX4	2.82551	1.72746	0.470499	3.67155	0.000241084	0.00328734
RPS5	9.03373	1.54943	0.424291	3.65181	0.000260396	0.00353753
CAPN2	3.08237	1.78379	0.489328	3.64539	0.000266989	0.0036137
PDCD4	34.0054	0.885876	0.243306	3.64099	0.000271593	0.00366251
PABPC1	7.30224	1.45193	0.401382	3.61732	0.000297667	0.00399943
H3C13	9.20845	1.35691	0.375281	3.61571	0.000299521	0.00400687
RPS26	4.61571	1.45969	0.403792	3.61495	0.000300406	0.00400687
CD276	4.77689	1.4777	0.40903	3.61269	0.000303042	0.00402739
NEDD8	3.77891	1.53851	0.426272	3.60922	0.000307115	0.00406678
MORF4L1	8.19287	1.45089	0.4025	3.6047	0.000312515	0.0041234
TGFB1	3.33942	1.65926	0.461559	3.59491	0.000324503	0.00426622
S100A13	3.40936	1.69715	0.472969	3.58829	0.000332849	0.00436032
MAGED2	7.1497	1.179	0.328924	3.58443	0.000337819	0.00440968
CDKN1C	5.57563	1.41659	0.396908	3.56907	0.000358256	0.00465986
PKM	8.16711	1.42554	0.399624	3.5672	0.000360816	0.00467659
EID1	3.82976	1.60567	0.451126	3.55926	0.000371903	0.00480331
THBS4	7.86405	-1.96133	0.551949	-3.55347	0.000380186	0.00489306
TRIR	4.30561	1.55243	0.437187	3.55094	0.000383854	0.00491011
NDUFA1	3.68089	1.56017	0.439396	3.55071	0.000384188	0.00491011
NUMA1	6.23017	1.27695	0.359961	3.54746	0.000388963	0.00495388
SEC61B	3.73765	1.50661	0.425308	3.54239	0.000396522	0.00503268
MRFAP1	6.66835	1.18607	0.335292	3.53741	0.000404065	0.00511073
SNRPD2	3.35816	1.52752	0.435142	3.51039	0.000447445	0.00563995
AP2S1	3.52858	1.47191	0.419503	3.5087	0.000450301	0.00565652
TPPP3	4.32765	1.59792	0.455676	3.5067	0.000453703	0.00567981
ATP5MC2	5.43358	1.5459	0.441374	3.50246	0.000460986	0.00575135
NDUFB8	3.74896	1.38254	0.395722	3.49372	0.000476338	0.00592274
TFG	4.46524	1.46062	0.418438	3.49065	0.000481852	0.00597106
CKM	6.59718	-1.56018	0.448127	-3.48155	0.000498523	0.00615684
ARL6IP4	4.66369	1.46442	0.422313	3.46762	0.000525094	0.00646324
CSRP1	2.52358	1.78845	0.516379	3.46345	0.00053329	0.00654217
RPS16	5.79741	1.25558	0.362767	3.46113	0.000537908	0.00657682
BAX	3.45623	1.57294	0.455344	3.4544	0.000551509	0.00672072
CREB5	4.76947	1.38405	0.401443	3.44768	0.000565424	0.00686746
SEC31A	5.31079	1.31036	0.381487	3.43489	0.000592794	0.00717614
UBE2I	3.89407	1.45794	0.42495	3.43086	0.000601668	0.0072596
CALU	8.22088	1.1635	0.339268	3.42943	0.000604846	0.00727402
EIF3F	4.39714	1.57686	0.460357	3.42529	0.000614134	0.00736158
CST3	3.23312	1.61815	0.472563	3.42419	0.00061664	0.00736754
SLC25A3	5.65929	1.49573	0.437122	3.42176	0.000622177	0.00740957
NFAM1	10.4069	0.986736	0.289152	3.41252	0.000643652	0.0076405
CLIC4	4.96017	1.30965	0.384339	3.40753	0.000655535	0.00775646
RAB11B	3.62112	1.44275	0.423631	3.40568	0.000660003	0.00778422
ARPC3	4.28147	1.70257	0.50015	3.40411	0.000663797	0.00780386
MYOZ1	3.36097	-1.86013	0.546732	-3.40228	0.000668258	0.00781333
RPL11	6.02647	1.49078	0.438202	3.40203	0.000668862	0.00781333
SPCS1	2.71456	1.63303	0.482016	3.38791	0.000704269	0.00820082
CMTM3	3.19925	1.66472	0.491989	3.38366	0.000715278	0.00830266
CNN2	5.53325	1.33222	0.39533	3.3699	0.000751964	0.00870096
MAPRE1	4.41402	1.35783	0.40339	3.36604	0.000762545	0.00879564
NDUFS8	2.53501	1.66542	0.497947	3.34457	0.000824093	0.00947578
CANX	6.4163	1.18248	0.354143	3.33899	0.000840829	0.009638
SRP9	4.16195	1.43224	0.429304	3.3362	0.000849321	0.00970502
PDIA6	3.77877	1.4393	0.432597	3.32712	0.000877478	0.00999562
SH3BGRL3	4.32214	1.62278	0.48831	3.32326	0.000889735	0.0101039
KIAA2026	3.47466	1.60213	0.482778	3.31855	0.000904846	0.0102438
HNRNPL	7.08331	1.2821	0.386655	3.31589	0.000913529	0.0103102
CTDSP2	4.01902	1.47537	0.445133	3.31444	0.000918254	0.0103318
SRSF11	4.69599	1.39333	0.422327	3.29917	0.000969707	0.0108773
ZNF358	2.8091	1.61961	0.492234	3.29032	0.00100074	0.0111912
AK8	21.9582	-1.28259	0.390043	-3.28834	0.00100781	0.011236
BIRC5	15.63	0.964397	0.293746	3.2831	0.00102674	0.0114123
YWHAE	7.95177	1.09051	0.332513	3.27962	0.00103948	0.0115191
DIO1	4.74765	-1.83536	0.561616	-3.268	0.00108312	0.0119665
H2BC5	3.69589	1.49128	0.458579	3.25195	0.00114615	0.0126248
TMEM258	3.36278	1.3395	0.41305	3.24294	0.00118303	0.0129921
BASP1	15.6859	0.963663	0.297658	3.23749	0.00120588	0.0132035
EIF3L	5.61285	1.21206	0.374634	3.23531	0.00121512	0.013265
ITGB1	5.9015	1.15551	0.358736	3.22106	0.00127716	0.013901
BSG	3.81033	1.316	0.409154	3.21638	0.00129817	0.0140452
PSMB2	4.11252	1.51244	0.470309	3.21585	0.00130059	0.0140452
RNF208	5.03507	-2.13701	0.664703	-3.21499	0.00130449	0.0140452
H2BC9	3.52137	1.43038	0.444946	3.21472	0.00130573	0.0140452
CAVIN3	2.56819	1.72053	0.535549	3.21264	0.00131519	0.0141056
TPD52L2	2.81303	1.54563	0.481484	3.21013	0.00132675	0.0141881
ITM2A	3.88903	-1.66094	0.517676	-3.20846	0.00133448	0.0142266
RPS29	5.10216	1.18595	0.369723	3.20768	0.00133811	0.0142266
ZNF428	3.18819	1.46286	0.457102	3.2003	0.00137285	0.0145538
GPC1	10.6256	1.09108	0.34123	3.19749	0.00138631	0.0146379
CD164	4.01799	1.32892	0.415681	3.19698	0.00138877	0.0146379
MYBPH	8.65919	-1.23753	0.388873	-3.18234	0.0014609	0.0153541
RBP1	4.38872	1.30065	0.40904	3.17976	0.00147396	0.0154303
APLP2	3.24203	1.52545	0.479814	3.17925	0.00147656	0.0154303
CASZ1	3.55739	-2.1095	0.666524	-3.16492	0.00155123	0.0161645
MYBPC1	3.21592	-1.75893	0.555922	-3.16398	0.00155628	0.0161712
EFHD2	2.74803	1.58271	0.500392	3.16295	0.00156182	0.0161829
THBS3	3.91616	1.38358	0.438291	3.15677	0.00159529	0.0164401
H2AC6	3.23901	1.40648	0.445554	3.15671	0.00159561	0.0164401
EIF3H	3.00197	1.4847	0.470683	3.15435	0.00160858	0.0165273
LASP1	4.47314	1.26383	0.401421	3.14839	0.00164171	0.0168206
NEB	4.67318	-1.60229	0.509654	-3.14388	0.00166722	0.0170344
MGP	3.28986	1.47254	0.470951	3.12674	0.00176755	0.0180093
TOMM7	3.39375	1.48779	0.476049	3.1253	0.00177625	0.0180479
CSPG4	5.42201	1.13524	0.363431	3.12367	0.00178612	0.018098
TEAD2	5.12009	1.09909	0.353641	3.10793	0.00188402	0.0190375
TPM2	27.6554	-0.967803	0.311608	-3.10584	0.0018974	0.0191199
NBL1	6.55184	1.18176	0.380737	3.10387	0.00191008	0.0191426
EIF2S3	3.88921	1.29913	0.41849	3.10434	0.00190705	0.0191426
HSPH1	2.57154	1.66409	0.536596	3.10121	0.00192735	0.019263
UBE2D3	4.15184	1.31086	0.425947	3.07751	0.00208741	0.020806
RPL27	9.05923	0.956117	0.311439	3.06999	0.00214065	0.0212342
PRKCSH	4.81203	1.27598	0.415653	3.06981	0.00214194	0.0212342
ANAPC13	2.58894	1.56027	0.509308	3.0635	0.00218764	0.0216287
PDAP1	3.57832	1.3277	0.434185	3.05792	0.00222878	0.0219762
MYOM2	3.89112	-2.1855	0.715051	-3.05643	0.0022399	0.0220267
GTF2I	5.98345	1.11019	0.363678	3.05268	0.00226807	0.0221847
ZNF592	3.9665	1.32644	0.434445	3.05319	0.00226419	0.0221847
PRDX5	3.05642	1.41969	0.465214	3.05169	0.00227559	0.0221991
SSR2	9.85687	0.978401	0.321011	3.04788	0.00230466	0.0223047
CAPRIN1	7.43363	0.989814	0.324692	3.04847	0.00230011	0.0223047
HNRNPLL	3.37951	1.37581	0.451309	3.04848	0.00229999	0.0223047
ATP2A1	5.51376	-1.43527	0.473706	-3.02988	0.0024465	0.0236152
MAGEB18	3.21571	-2.13612	0.705476	-3.02792	0.00246245	0.0237067
KCNH5	2.85023	1.99054	0.657631	3.02683	0.00247132	0.0237299
RHOC	3.62252	1.27704	0.422725	3.02098	0.00251958	0.0240812
STK24	3.53961	1.54065	0.510012	3.0208	0.00252104	0.0240812
H1-3	3.00232	1.66968	0.553198	3.01823	0.00254256	0.0242237
TLE3	4.9955	1.24031	0.411939	3.0109	0.0026047	0.0247514
HNRNPU	11.4704	0.910847	0.303135	3.00475	0.00265796	0.0251922
PPP1CB	5.34003	1.06793	0.355947	3.00024	0.00269765	0.0255026
PDLIM4	4.32977	1.39085	0.464605	2.99361	0.00275699	0.0259965
PYGM	3.36867	-1.63516	0.546844	-2.99018	0.00278813	0.026188
PHLDB2	4.53198	1.16752	0.390499	2.9898	0.00279158	0.026188
TMED10	3.67748	1.40597	0.470792	2.9864	0.00282283	0.0264047
FABP5	3.02126	1.39921	0.468632	2.98572	0.00282908	0.0264047
TCEAL9	4.7519	1.25204	0.419964	2.9813	0.0028703	0.0267214
HSP90AB1	11.939	0.879117	0.295373	2.97629	0.00291755	0.0270484
ATP5PO	2.90155	1.40048	0.47059	2.97602	0.00292017	0.0270484
ESD	2.96148	1.47667	0.496673	2.97313	0.00294783	0.0272358
SF3B1	5.37868	1.06554	0.358554	2.97176	0.00296096	0.0272885
H2AC19	2.95364	1.43345	0.48254	2.97063	0.00297192	0.0273209
NREP	8.00684	1.09429	0.369113	2.96465	0.00303024	0.027718
TRMT112	3.49552	1.43297	0.483352	2.96466	0.00303021	0.027718
SMS	3.1444	1.3675	0.461729	2.96169	0.00305953	0.0278628
GPR75	3.31665	-2.10531	0.710889	-2.96152	0.00306126	0.0278628
HNRNPD	7.95104	1.03968	0.351311	2.95942	0.00308218	0.0279838
MEF2C	3.6627	-1.50621	0.509359	-2.95706	0.00310588	0.02806
PSMB1	2.7073	1.54725	0.523123	2.95772	0.00309924	0.02806
EIF3D	3.23571	1.38371	0.468058	2.95628	0.00311375	0.028062
NFKB2	4.22548	-1.40648	0.475948	-2.95512	0.00312547	0.0280986
LDB3	3.37256	-1.46386	0.496377	-2.94909	0.00318706	0.0285474
COMMD4	3.59147	1.2789	0.433713	2.94872	0.00319096	0.0285474
POSTN	5.6331	-1.34209	0.455604	-2.94573	0.00322198	0.0287548
KRT8	2.51894	1.51165	0.513578	2.94338	0.00324654	0.0289037
ITM2C	4.66427	1.14884	0.390631	2.94098	0.0032717	0.0289997
ZNF579	4.10126	1.23635	0.420404	2.94085	0.00327314	0.0289997
IMPDH2	3.81026	1.17406	0.400546	2.93115	0.00337711	0.0298451
VPS72	2.81622	1.5048	0.513507	2.93044	0.00338483	0.0298451
RAB10	2.50998	1.53352	0.523459	2.9296	0.00339402	0.0298544
RGS18	13.4768	0.841475	0.287519	2.92668	0.00342604	0.0300639
PHACTR3	3.21214	-1.88504	0.644489	-2.92486	0.00344606	0.0301674
EIF5A	6.44174	1.08004	0.369812	2.92052	0.00349444	0.0304894
COL27A1	4.45902	1.13156	0.38751	2.92008	0.00349946	0.0304894
WSB1	6.1559	1.03723	0.355879	2.91455	0.00356202	0.0309609
COL1A2	242.764	0.807985	0.277507	2.91159	0.00359595	0.0311084
MYH4	3.96294	-1.3846	0.475471	-2.91205	0.00359066	0.0311084
H1-2	5.06694	1.25738	0.43237	2.90811	0.00363619	0.0313824
MED25	3.35176	-1.82678	0.628826	-2.90506	0.00367183	0.0316157
PPIB	5.04257	1.13657	0.391746	2.90129	0.00371626	0.0319233
ZNF703	3.8604	1.15021	0.397012	2.89717	0.00376544	0.0322701
CORO1C	4.95063	1.15414	0.398796	2.89405	0.00380302	0.0325163
COX4I1	3.24911	1.31712	0.455252	2.89317	0.00381372	0.0325319
LAPTM4A	6.01078	0.943207	0.326807	2.88613	0.00390011	0.0330384
ACVR1	3.39621	1.31099	0.454221	2.88625	0.00389864	0.0330384
ADGRA2	4.65044	-2.02674	0.702148	-2.88649	0.00389565	0.0330384
TTC31	9.05465	-1.27454	0.442427	-2.88078	0.00396692	0.0331985
ADCY6	7.45641	1.01711	0.352882	2.8823	0.00394779	0.0331985
TSC22D1	6.36296	0.955749	0.331736	2.88105	0.00396352	0.0331985
MYH7B	2.90946	-1.61622	0.561134	-2.88027	0.00397332	0.0331985
SACS	4.80163	1.08713	0.377333	2.8811	0.00396292	0.0331985
BANF1	3.78393	1.33582	0.463233	2.88369	0.00393044	0.0331985
CBWD2	4.6618	1.15266	0.400636	2.87709	0.00401366	0.0333079
PTTG1IP	4.10126	1.17754	0.409194	2.8777	0.00400588	0.0333079
YLPM1	2.64063	1.41888	0.4931	2.87747	0.00400879	0.0333079
SKIV2L	2.55854	1.4331	0.498406	2.87537	0.00403549	0.0334135
GANAB	4.52453	1.17643	0.409548	2.87252	0.00407211	0.0336408
MTRNR2L1	140.724	-0.683271	0.238313	-2.86711	0.00414235	0.0340676
PBX2	4.16746	1.24052	0.432662	2.86718	0.00414153	0.0340676
EDF1	5.41361	1.14792	0.4008	2.86408	0.00418224	0.0343187
SERPINE1	3.08344	1.48678	0.51933	2.86288	0.00419814	0.0343722
RASGRP4	3.0181	-1.92497	0.674701	-2.85307	0.00432996	0.0353726
NEXN	3.48896	-1.93428	0.678639	-2.85024	0.00436865	0.0356093
ACADVL	4.3535	1.19825	0.420611	2.84884	0.00438795	0.0356873
HMGN1	6.63746	1.09339	0.383948	2.84774	0.00440305	0.0357309
RAB1A	5.26616	1.05785	0.371642	2.84643	0.00442119	0.0357989
NDUFB4	3.07822	1.29225	0.454355	2.84414	0.0044531	0.0359779
RAB1B	4.46253	1.24948	0.439534	2.84275	0.00447268	0.0359947
UPK3BL2	6.40184	1.2009	0.422465	2.84259	0.0044748	0.0359947
SEC61G	4.01688	1.27282	0.448354	2.83887	0.00452729	0.0363372
BEX3	3.02596	1.28977	0.454515	2.83769	0.00454414	0.0363928
MXD4	4.73721	1.08963	0.385618	2.82567	0.00471819	0.0374596
JMJD1C	4.90334	1.11881	0.395778	2.82687	0.0047005	0.0374596
ELOC	3.35528	1.24603	0.440819	2.82663	0.00470401	0.0374596
ADAMTS16	2.52308	1.54511	0.546786	2.82581	0.00471613	0.0374596
CD59	3.16438	1.25944	0.446085	2.82331	0.00475302	0.0376546
POLR2L	3.97497	1.1361	0.402548	2.82228	0.00476835	0.0376946
GLIPR2	3.33987	1.35139	0.479212	2.82003	0.00480196	0.0378787
HNRNPA2B1	21.7059	0.811803	0.288343	2.8154	0.00487161	0.0383457
COL24A1	3.62703	-1.44527	0.51362	-2.81388	0.00489475	0.0384452
STMN1	10.5418	1.19975	0.426673	2.81188	0.00492533	0.0386028
CSNK1G2	3.34208	1.3551	0.482268	2.80985	0.00495641	0.0387636
POLR2E	14.4675	0.837422	0.298598	2.80451	0.00503925	0.0392441
PDE4DIP	3.11958	-1.51634	0.540631	-2.80476	0.00503534	0.0392441
EIF3G	3.35487	1.20791	0.431303	2.8006	0.00510075	0.0395623
LRRC17	4.97948	1.32955	0.474746	2.80054	0.00510168	0.0395623
RPL10L	5.43973	1.08747	0.388595	2.79846	0.00513467	0.0397341
UBB	7.83419	0.916363	0.327764	2.7958	0.00517712	0.03976
FHL3	3.44326	1.33386	0.477256	2.79486	0.00519221	0.03976
HINT1	3.19982	1.30805	0.467759	2.79643	0.00516709	0.03976
YWHAH	3.21389	1.28539	0.459768	2.79574	0.00517808	0.03976
CLU	2.70639	1.38547	0.495637	2.79534	0.00518457	0.03976
EFNB3	3.27055	1.87444	0.670984	2.79357	0.00521304	0.0398363
TMA7	21.8159	0.762964	0.274393	2.78055	0.00542661	0.0413821
CYP26B1	3.52601	-1.82429	0.65629	-2.77971	0.00544078	0.0414041
CKB	12.4382	0.799822	0.287914	2.77799	0.00546963	0.0415375
IL24	41.3639	0.718724	0.258864	2.77645	0.0054956	0.0416156
CHCHD5	3.26184	1.32895	0.47872	2.77604	0.00550261	0.0416156
MFAP2	2.91986	1.27416	0.45985	2.77082	0.00559146	0.0422006
EIF4B	6.17577	1.0568	0.381701	2.76866	0.00562871	0.0422211
HNRNPA0	2.84857	1.43374	0.517791	2.76895	0.00562365	0.0422211
PLTP	2.83679	1.29679	0.468224	2.76959	0.00561268	0.0422211
FBL	3.62663	1.34139	0.484908	2.76627	0.00567011	0.0424448
ZNF334	7.19511	0.905257	0.327851	2.76118	0.00575921	0.043024
ARRDC1	13.1145	0.798759	0.289428	2.75979	0.00578394	0.0431209
STRAP	3.77452	1.18314	0.429084	2.75737	0.0058269	0.0433531
RAB5B	2.84437	1.35181	0.490607	2.75538	0.00586239	0.0435289
HNRNPH1	6.43409	1.02912	0.373636	2.75432	0.00588134	0.0435813
LUC7L	2.67592	1.34121	0.48738	2.75188	0.00592545	0.0438196
GDI2	3.67987	1.16549	0.424163	2.74774	0.00600068	0.0442848
LAMTOR2	2.58332	1.36411	0.496564	2.7471	0.00601249	0.0442848
DAZAP2	2.98556	1.37986	0.50246	2.74622	0.00602867	0.0443149
MEPCE	28.672	0.80367	0.2929	2.74384	0.0060725	0.0444558
IGFBP4	7.07834	0.927687	0.338062	2.74413	0.00606718	0.0444558
ISLR	2.89312	1.22548	0.446733	2.74321	0.0060842	0.0444558
ZNF625	13.2642	0.809044	0.295126	2.74135	0.00611866	0.0446187
RTN4	11.2002	0.818672	0.298714	2.74066	0.00613165	0.0446248
GNAS	13.2111	-0.979296	0.35773	-2.73753	0.00619026	0.0449208
SRSF6	4.78669	1.00898	0.368621	2.73718	0.00619681	0.0449208
ACTR3	4.17852	1.11765	0.408637	2.73506	0.0062368	0.0451215
ZNF207	6.79317	1.0898	0.399023	2.73117	0.00631094	0.045212
CACNA1I	2.80256	-1.61256	0.590017	-2.73308	0.00627448	0.045212
AP3D1	3.95833	1.21263	0.443756	2.73264	0.00628291	0.045212
CKAP4	3.56246	1.27522	0.46691	2.73119	0.0063107	0.045212
EVX1	2.64374	-1.79165	0.655913	-2.73153	0.00630402	0.045212
UBA52	7.31442	1.06524	0.390334	2.72906	0.00635156	0.0454143
CIRBP	4.31225	1.23463	0.452628	2.72769	0.006378	0.0454387
TIMP2	3.84712	1.16017	0.425383	2.72735	0.00638445	0.0454387
SREBF2	3.01818	1.28084	0.469697	2.72696	0.00639215	0.0454387
HMGN2	10.2976	0.792333	0.290675	2.72584	0.00641377	0.0455043
HNRNPAB	3.71015	1.16516	0.42811	2.72163	0.006496	0.0459987
CDC37	5.87499	1.10635	0.407171	2.71716	0.00658439	0.0465348
NBPF15	11.5957	0.86834	0.31989	2.7145	0.00663768	0.0468212
NUCB1	4.48316	1.03539	0.381524	2.71382	0.00665114	0.046826
PLOD1	6.97426	0.980771	0.361526	2.71287	0.00667042	0.0468718
FCF1	8.00498	1.01505	0.374482	2.71055	0.00671709	0.0471096
H2AX	3.35332	1.20382	0.444333	2.70927	0.00674309	0.0472017
SRSF2	5.34965	1.01272	0.373948	2.70817	0.00676544	0.0472678
LDHAL6A	5.63238	-1.11945	0.413818	-2.70518	0.00682682	0.0475614
PPIAL4A	2.71714	1.38338	0.511444	2.70486	0.00683338	0.0475614
EIF3E	3.70056	1.18526	0.438324	2.70408	0.00684946	0.047583
C8orf33	2.59952	-1.50067	0.555263	-2.70263	0.00687934	0.0476102
H3C2	2.75107	1.37832	0.5099	2.70311	0.00686947	0.0476102
CCNG2	4.76822	1.14008	0.422203	2.70032	0.00692735	0.0478522
ACTN3	4.50315	-1.30708	0.484498	-2.6978	0.00697984	0.0479439
S100A1	2.66774	-1.56461	0.579899	-2.69808	0.00697406	0.0479439
GNL3	4.17305	1.16979	0.43359	2.69792	0.0069774	0.0479439
CUL1	3.44402	-1.74378	0.646898	-2.6956	0.00702611	0.0481715
NICN1	3.70456	1.13228	0.42032	2.69386	0.00706306	0.0483345
FHIP2A	2.5685	1.30759	0.485626	2.69259	0.00708994	0.0484281
TLN1	4.6645	1.06831	0.396907	2.6916	0.0071111	0.0484824
ACTR2	3.01787	1.26364	0.469707	2.69027	0.00713953	0.0485859
HLA-DQB1	2.81255	-1.51161	0.56315	-2.68421	0.00727016	0.0493833
SULT1A4	7.87892	0.852952	0.317945	2.6827	0.00730307	0.0495151
LIMA1	3.38077	1.18776	0.443103	2.68055	0.0073501	0.0497197
RABAC1	3.39783	1.19836	0.447135	2.68008	0.00736036	0.0497197
FHL1	7.70771	-1.08575	0.405988	-2.67434	0.0074877	0.0502373
NCK1	4.17939	-1.26317	0.472138	-2.67542	0.0074635	0.0502373
CPNE1	3.14429	1.27257	0.475876	2.67416	0.00749177	0.0502373
SLC17A2	3.08514	-1.59656	0.596854	-2.67495	0.00747402	0.0502373
NDUFS5	4.07776	1.14801	0.429751	2.67134	0.00755489	0.0505681
MECP2	5.95477	0.982704	0.368129	2.66945	0.00759754	0.050761
ACIN1	5.35596	1.01222	0.379603	2.66652	0.00766406	0.0511123
ARSI	3.29584	1.19353	0.447826	2.66517	0.00769491	0.0512249
PAFAH1B1	3.11335	1.33453	0.501062	2.66341	0.00773542	0.0514013
MYH2	2.92141	-1.46514	0.551132	-2.65842	0.00785081	0.0519797
KDELR1	4.0009	1.12707	0.423943	2.65854	0.00784793	0.0519797
ZNF587	38.5961	0.655567	0.246878	2.65543	0.00792064	0.0522849
JPT1	4.35142	1.16114	0.437304	2.65523	0.00792542	0.0522849
MARVELD1	2.74954	1.32056	0.498387	2.64966	0.00805735	0.0530599
U2AF1	6.04475	0.993475	0.375375	2.64662	0.00813005	0.0534427
C4orf46	26.9882	0.703983	0.266401	2.64257	0.00822796	0.0536434
ZNF417	11.1988	0.841351	0.31841	2.64235	0.00823325	0.0536434
SMARCE1	3.39501	1.19823	0.453315	2.64326	0.00821116	0.0536434
RPL36AL	2.68641	1.2881	0.487488	2.64233	0.0082337	0.0536434
C3orf22	4.05739	-1.89222	0.716089	-2.64244	0.00823117	0.0536434
RCN1	6.65796	0.975736	0.370144	2.6361	0.0083866	0.0545426
MYH7	2.76157	-1.3918	0.528519	-2.6334	0.00845341	0.0548798
RCC2	6.85433	1.03971	0.395089	2.63158	0.00849889	0.0550776
OVOL1	6.03373	0.889466	0.33835	2.62883	0.00856783	0.0553288
H4C13	5.42345	1.24252	0.472591	2.62916	0.00855948	0.0553288
BMPR2	2.76212	-1.53739	0.585584	-2.6254	0.00865478	0.0555967
DNMT3A	4.96663	1.01978	0.388415	2.62549	0.00865236	0.0555967
HPGD	3.05351	-1.78312	0.678949	-2.62629	0.00863205	0.0555967
RAD23B	14.3976	0.795869	0.30325	2.62447	0.00867851	0.0556517
CBX3	3.73623	1.2774	0.487003	2.62298	0.00871631	0.0557966
CCNE1	3.13625	-1.7272	0.6591	-2.62054	0.00877906	0.0561003
CALM3	6.21055	0.943556	0.360148	2.61991	0.00879531	0.0561064
SEPTIN7	4.79642	0.970636	0.370791	2.61774	0.00885134	0.0562681
LEFTY1	2.87053	1.20619	0.460694	2.61819	0.00883963	0.0562681
KCNC2	3.25769	-1.68026	0.643043	-2.61298	0.00897566	0.0569597
SMIM19	3.39011	1.06206	0.406651	2.61173	0.00900862	0.0570701
C12orf56	3.0042	-1.83653	0.703443	-2.61077	0.00903374	0.0571306
NOTCH3	10.4038	0.833957	0.319991	2.60619	0.00915563	0.0577025
PKDCC	4.123	1.11846	0.429103	2.60651	0.00914705	0.0577025
TNNT1	11.9966	0.947079	0.363843	2.60299	0.00924147	0.0581436
MEST	12.8523	0.997957	0.383742	2.6006	0.00930617	0.0584504
LUC7L3	4.79783	1.04772	0.403082	2.59927	0.00934216	0.0585761
SERPINB6	3.00022	1.18681	0.45713	2.59622	0.00942547	0.0589977
MRPL28	4.29289	1.026	0.395506	2.59414	0.00948273	0.0590749
FKBP1A	4.43348	1.12163	0.432391	2.59402	0.00948612	0.0590749
ERV3-1	3.49945	1.24111	0.478261	2.59504	0.00945807	0.0590749
LYRM2	39.847	0.711117	0.274427	2.59128	0.00956199	0.0594464
ZNF354C	5.94488	0.902671	0.348528	2.58995	0.0095989	0.0595749
PLEKHD1	6.0093	-1.02934	0.397751	-2.58791	0.00965599	0.059828
TEAD3	3.10392	1.20856	0.468066	2.58202	0.00982242	0.0607565
EIF3M	3.17691	1.23653	0.479121	2.58083	0.00985629	0.0608634
MICALL2	91.6801	0.743976	0.288466	2.57908	0.0099065	0.0610706
DYNLL1	5.73634	0.968561	0.376265	2.57414	0.0100488	0.0616372
PWWP3A	3.14846	1.17553	0.45651	2.57504	0.0100228	0.0616372
AHCY	2.84505	1.24886	0.485064	2.57463	0.0100348	0.0616372
EIF4G2	12.7004	0.7939	0.308515	2.57329	0.0100736	0.0616861
CLTC	4.2654	1.19391	0.464079	2.57265	0.0100924	0.0616981
PABPN1	4.00908	1.1171	0.434555	2.57069	0.0101496	0.0619448
BMP1	5.03552	1.015	0.395061	2.56923	0.0101924	0.0621023
SCT	3.66118	-1.27331	0.495792	-2.56824	0.0102218	0.0621737
FXYD6	3.10855	1.16942	0.455436	2.56769	0.010238	0.0621737
B3GNT6	2.61207	-1.65731	0.646069	-2.56522	0.0103109	0.062513
SDHA	4.64062	0.966904	0.377505	2.5613	0.0104281	0.0631192
PSMA1	3.28575	1.22711	0.479507	2.55911	0.0104939	0.0633291
IQSEC1	2.69201	1.24537	0.48666	2.559	0.0104973	0.0633291
CHKB	5.00551	1.19694	0.467881	2.55821	0.0105212	0.0633691
NPIPB6	10.0533	0.82109	0.321067	2.55738	0.0105464	0.0634167
PRDX1	3.92883	1.06599	0.419062	2.54376	0.0109665	0.0656279
UBE2E3	3.26988	1.22361	0.481139	2.54315	0.0109857	0.0656279
PSMA2	3.79426	-1.57266	0.618333	-2.54338	0.0109784	0.0656279
TAX1BP3	2.72738	1.30953	0.514843	2.54355	0.0109731	0.0656279
SURF4	3.10521	1.24903	0.491996	2.53871	0.0111263	0.0663599
ANKRD36B	28.2958	0.701515	0.276463	2.53746	0.0111659	0.0663799
PRDX2	6.26091	0.925475	0.364721	2.53749	0.0111651	0.0663799
LRRC27	4.97405	-1.58278	0.62474	-2.53351	0.0112928	0.0670258
TACR2	2.64844	-1.67311	0.662392	-2.52586	0.0115416	0.0683919
SLC3A2	3.09383	1.17295	0.465448	2.52005	0.0117338	0.0694188
NCL	7.24293	1.01975	0.404751	2.51946	0.0117536	0.0694236
MPZL1	6.45763	0.900452	0.357502	2.51873	0.0117778	0.069455
SERPINH1	4.68217	1.00664	0.400391	2.51415	0.011932	0.0702094
UQCRHL	4.2144	1.05892	0.421245	2.51379	0.011944	0.0702094
ARHGDIA	5.87882	0.901165	0.358705	2.51227	0.0119956	0.0703995
MYOT	4.79532	-1.20561	0.480752	-2.50777	0.0121497	0.07119
ERH	3.88467	1.04875	0.420279	2.49536	0.0125831	0.0736121
NPFF	6.1037	1.07609	0.431591	2.49331	0.0126557	0.0736843
BACH1	3.55963	1.04739	0.419947	2.4941	0.0126278	0.0736843
NEO1	3.44736	-1.4479	0.580668	-2.49351	0.0126487	0.0736843
SLN	2.94498	-1.38232	0.555663	-2.48769	0.0128577	0.0747417
PPP1R14B	6.63423	0.82704	0.333047	2.48325	0.0130188	0.0755587
IFITM2	22.8136	0.624177	0.252098	2.47593	0.013289	0.0766998
HSPB1	3.9909	1.06073	0.428284	2.4767	0.0132604	0.0766998
DRG1	2.73153	1.20015	0.484999	2.47454	0.0133409	0.0766998
H4C6	2.59875	1.21078	0.48922	2.47492	0.0133265	0.0766998
GLIS1	3.07495	-1.6359	0.660818	-2.47557	0.0133025	0.0766998
ZNF35	2.53726	-1.68574	0.680869	-2.47587	0.0132912	0.0766998
HDAC4	3.26238	-1.76916	0.716544	-2.46901	0.0135486	0.0777721
CTSS	3.45092	-1.15313	0.467459	-2.46681	0.0136322	0.0781297
RPL26L1	5.36192	0.924783	0.375018	2.46597	0.0136644	0.0781922
KIF5B	4.17349	1.0942	0.444142	2.46362	0.0137542	0.078583
CHI3L1	2.57963	-1.53477	0.625516	-2.45361	0.0141431	0.0806794
MRPL55	5.06977	0.894286	0.364595	2.45282	0.014174	0.0807303
PLEKHO1	3.10348	1.07072	0.436994	2.4502	0.0142776	0.0811543
HDGFL1	3.53697	-1.42184	0.580385	-2.44982	0.0142927	0.0811543
VASH2	4.2659	1.0238	0.418277	2.44767	0.0143784	0.0813991
PBXIP1	3.22645	1.10867	0.452956	2.44762	0.0143802	0.0813991
FGD5	3.00452	-1.27594	0.52253	-2.44184	0.0146126	0.0825868
G3BP1	4.8603	0.965343	0.395805	2.43894	0.0147306	0.0830724
UBE2H	3.03523	1.1489	0.471235	2.43806	0.0147664	0.0830724
C1S	3.16236	-1.35094	0.553992	-2.43856	0.0147459	0.0830724
KCNE1	2.98553	-1.54299	0.634158	-2.43313	0.014969	0.0840833
JOSD2	6.2672	0.822477	0.338549	2.42942	0.015123	0.0846888
SEPTIN11	5.39847	0.945071	0.388976	2.42964	0.015114	0.0846888
ADAR	4.16804	1.02312	0.421909	2.42497	0.0153095	0.0856024
CCDC112	5.47367	1.09527	0.451926	2.42357	0.015369	0.0858043
ORAI2	3.2852	1.04819	0.432618	2.42289	0.0153976	0.0858336
OR8D4	2.64939	-1.31018	0.541082	-2.4214	0.0154609	0.0860554
FKBP11	2.53428	1.21	0.499939	2.4203	0.0155076	0.0861847
ACHE	2.78076	-1.39731	0.577822	-2.41824	0.0155957	0.086543
MYH11	2.51236	-1.35272	0.559594	-2.41733	0.015635	0.0866301
CAPNS1	8.38561	0.835961	0.34604	2.4158	0.0157008	0.0866793
XRCC6	3.76868	1.04329	0.431838	2.41594	0.0156947	0.0866793
NPTN	4.057	1.15097	0.4765	2.41547	0.0157148	0.0866793
DCLK3	4.02066	-1.18183	0.489597	-2.41388	0.0157836	0.0869281
ARF1	5.54663	0.875429	0.362808	2.41293	0.015825	0.0870256
WDR73	2.81396	1.11828	0.464061	2.40978	0.0159623	0.0876494
HM13	3.88993	1.01205	0.420095	2.4091	0.0159921	0.0876708
HEXIM1	2.7031	1.23056	0.510906	2.4086	0.016014	0.0876708
STBD1	31.567	0.612261	0.254299	2.40764	0.016056	0.0877134
WNK1	3.51559	1.09053	0.453032	2.40718	0.0160764	0.0877134
FAM131C	2.60449	-1.28489	0.533861	-2.40679	0.0160935	0.0877134
EFR3B	3.03157	1.15124	0.478598	2.40543	0.0161532	0.0879082
LMNA	8.42403	0.903318	0.375947	2.40278	0.016271	0.0881565
NEBL	3.12942	-1.36302	0.567035	-2.40377	0.0162269	0.0881565
SMN1	3.34546	-1.32524	0.551434	-2.40326	0.0162497	0.0881565
CASQ2	2.98514	-1.26451	0.527204	-2.39852	0.0164617	0.0890582
KLHL31	2.91971	-1.28511	0.535956	-2.39778	0.0164946	0.089105
MLXIP	4.3071	0.999372	0.418133	2.39008	0.0168446	0.0905951
ESYT1	3.07034	1.14237	0.47793	2.39024	0.0168372	0.0905951
CPA4	2.69028	1.2542	0.524609	2.39074	0.0168146	0.0905951
NME9	2.68974	-1.57662	0.660192	-2.38813	0.0169346	0.0909457
TUBB4B	7.51136	0.833482	0.349538	2.38452	0.0171012	0.0917064
NUDC	3.80108	1.01166	0.424446	2.3835	0.0171491	0.0918289
LMF2	4.38529	0.954047	0.400443	2.38248	0.0171964	0.0919483
DDOST	4.33468	0.980379	0.411644	2.38162	0.0172367	0.0920297
CTNNB1	5.22971	0.927615	0.389591	2.381	0.0172658	0.0920508
EIF4G1	4.66476	1.00907	0.423929	2.38028	0.0172994	0.0920962
NPHP3	2.59485	-1.3701	0.576163	-2.37798	0.017408	0.0925399
ABLIM3	3.02978	-1.15364	0.485721	-2.3751	0.0175443	0.0928608
SETD5	3.71607	1.0553	0.444206	2.37571	0.0175154	0.0928608
CDC123	2.5586	1.11903	0.47107	2.37551	0.0175248	0.0928608
WASHC4	4.08909	-1.43552	0.604684	-2.374	0.0175968	0.0928787
SUGT1	2.97488	1.10819	0.466811	2.37396	0.0175983	0.0928787
KRAS	11.8711	0.737943	0.310965	2.37308	0.0176406	0.092968
HACD1	2.84032	-1.63203	0.688073	-2.37188	0.0176978	0.0931354
EIF1	5.91439	0.961506	0.405883	2.36893	0.0178398	0.0937485
TENM3	2.57109	-1.44114	0.60879	-2.36722	0.0179222	0.0940467
HSPA5	5.25586	1.00933	0.426499	2.36656	0.0179543	0.0940805
SEPTIN9	8.84978	0.887855	0.375571	2.36401	0.0180782	0.0945689
COL5A3	3.9196	0.997513	0.422034	2.36359	0.0180991	0.0945689
OR56B1	2.57625	-1.49863	0.634493	-2.36194	0.0181797	0.0948551
WNK4	2.5128	-1.50913	0.640982	-2.3544	0.0185526	0.0966631
FGFR4	3.5856	1.11368	0.473138	2.35383	0.0185812	0.0966748
S100Z	2.97162	-1.61336	0.686675	-2.34953	0.0187972	0.097522
ST6GALNAC5	2.80259	-1.68465	0.716971	-2.34968	0.0187897	0.097522
APOBEC3A_B	32.4455	0.659003	0.280684	2.34785	0.0188822	0.0976867
USP22	4.71677	0.990411	0.42178	2.34817	0.018866	0.0976867
BBLN	6.30733	0.807115	0.34404	2.34599	0.0189766	0.0980369
H3-3B	5.63473	0.848813	0.361997	2.34481	0.0190368	0.0980718
ST6GALNAC6	2.7268	1.13504	0.483999	2.34512	0.0190208	0.0980718
SARAF	2.95118	1.07391	0.458539	2.34203	0.0191793	0.0986671
DOK3	3.26335	1.09892	0.469335	2.34144	0.0192096	0.0986848
RBM5	4.95609	0.891132	0.380801	2.34015	0.0192759	0.0988646
SEC61A1	3.64357	1.04349	0.445992	2.33971	0.0192985	0.0988646
ANXA6	7.2485	0.787963	0.337049	2.33783	0.019396	0.0992255
VAPA	3.49092	-1.40207	0.600789	-2.33371	0.019611	0.0999987
SPIN3	2.90539	-1.47885	0.633786	-2.33337	0.019629	0.0999987
KCTD20	2.69828	1.12121	0.480303	2.33438	0.0195758	0.0999987
BCL2L11	3.98544	0.916932	0.393842	2.32817	0.0199029	0.101254
DCAF8	3.19838	1.06705	0.458553	2.327	0.0199654	0.101431
CDK4	3.83113	1.19495	0.513722	2.32606	0.0200155	0.101545
EPN1	4.23799	0.919513	0.395776	2.32332	0.0201621	0.101866
TOMM20	3.88513	0.992831	0.427244	2.3238	0.0201362	0.101866
HDGF	3.69853	0.998919	0.42991	2.32356	0.0201493	0.101866
ZNF506	48.8042	0.664133	0.286071	2.32157	0.0202562	0.10206
ATP2B4	5.13374	0.875971	0.377236	2.32208	0.0202288	0.10206
MMP14	6.81513	0.872795	0.376285	2.3195	0.0203677	0.102382
DSTN	4.61601	1.14171	0.492253	2.31935	0.020376	0.102382
MAGEA3	16.4485	0.660096	0.284772	2.31798	0.0204504	0.102616
MRC2	3.23491	1.04453	0.451147	2.31527	0.020598	0.103207
LETMD1	2.89063	1.15427	0.498649	2.31479	0.0206245	0.103207
GPR161	2.53068	-1.34643	0.582146	-2.31287	0.0207299	0.103593
SIGLEC16	9.87369	0.759642	0.328655	2.31137	0.0208127	0.103865
OGN	3.56794	-1.25193	0.542348	-2.30836	0.0209793	0.104555
MARCHF6	3.15851	1.18713	0.515035	2.30494	0.0211698	0.105361
SH3D21	5.17009	0.858374	0.372498	2.30437	0.0212019	0.105378
AGAP9	3.49224	1.15618	0.502246	2.30202	0.021334	0.105747
LGALS9C	2.69176	-1.62241	0.704687	-2.30231	0.0213176	0.105747
OR6N2	2.78606	-1.66761	0.725015	-2.30011	0.021442	0.106139
CYB5R3	3.18087	1.00658	0.438014	2.29807	0.021558	0.10657
ICE1	2.67127	1.14363	0.498308	2.29503	0.0217313	0.107282
KDM5C	3.87889	0.948521	0.413579	2.29344	0.0218225	0.107493
IQANK1	2.62643	-1.50069	0.654391	-2.29327	0.0218327	0.107493
CTSD	3.52802	1.0328	0.451236	2.28881	0.0220902	0.108615
SMARCC1	4.01804	0.951403	0.416034	2.28684	0.022205	0.109033
STK25	7.35926	0.843096	0.368897	2.28545	0.0222865	0.109146
CBX5	6.24915	0.873698	0.382629	2.28341	0.0224064	0.109146
CCAR1	3.47135	1.02451	0.44848	2.28441	0.0223477	0.109146
PFKL	4.24385	1.04968	0.459654	2.28364	0.0223925	0.109146
INAVA	2.84094	-1.3349	0.584294	-2.28464	0.022334	0.109146
UAP1	3.54478	-1.49694	0.655072	-2.28515	0.0223043	0.109146
TRIM8	4.3966	0.970584	0.425274	2.28226	0.0224743	0.109186
TRIM72	3.40681	-1.55963	0.683226	-2.28275	0.0224453	0.109186
DHRS1	5.68892	0.834867	0.366155	2.28009	0.0226024	0.109664
TUSC2	38.527	0.590976	0.259255	2.27952	0.0226362	0.109683
BEX4	2.55523	1.12701	0.494682	2.27826	0.0227111	0.1099
ANKRD10	3.82306	1.10945	0.487759	2.27458	0.0229309	0.110817
TMEM209	2.81063	-1.40255	0.616884	-2.27361	0.0229896	0.110955
ERGIC3	3.58826	0.936668	0.412557	2.2704	0.0231836	0.111744
DDX39B	5.44882	0.804283	0.354828	2.26668	0.0234097	0.112686
UBA1	6.35015	0.862097	0.380802	2.2639	0.0235802	0.113358
RPS6KA4	3.20869	-1.1617	0.514039	-2.25994	0.0238252	0.114386
TNFRSF10B	2.74305	1.11575	0.49394	2.25887	0.0238913	0.114554
PRRC1	3.44773	1.06993	0.473955	2.25746	0.0239794	0.114826
H2BS1	3.32501	1.03573	0.458911	2.25694	0.0240121	0.114832
ZNF140	67.201	0.609992	0.270687	2.2535	0.0242277	0.115697
EEF1D	7.1342	0.822367	0.365163	2.25205	0.0243189	0.115697
COX6B1	3.75473	0.922588	0.409508	2.25292	0.0242643	0.115697
NPC1L1	2.63819	-1.4227	0.631737	-2.25205	0.0243191	0.115697
SQSTM1	3.26763	1.08373	0.481735	2.24963	0.0244721	0.116274
SRRM2	11.0034	0.687932	0.305878	2.24904	0.0245099	0.116303
LAMC1	8.27504	0.823028	0.366542	2.24539	0.0247432	0.116979
PAN3	3.19092	-1.40312	0.625047	-2.24482	0.0247798	0.116979
CRTAP	3.6185	1.11451	0.496291	2.24567	0.0247252	0.116979
OGDHL	2.69656	-1.53091	0.681966	-2.24486	0.0247774	0.116979
WAPL	3.15045	-1.30269	0.580673	-2.24341	0.0248705	0.117256
SPTAN1	7.21722	0.842504	0.375733	2.24229	0.0249425	0.117444
DCN	8.19348	-0.867078	0.387191	-2.2394	0.0251296	0.118174
NECTIN1	4.47618	0.951059	0.425043	2.23756	0.0252498	0.118587
DCTN2	3.08874	1.1255	0.503139	2.23696	0.0252891	0.11862
IL32	4.27077	-1.16691	0.521821	-2.23623	0.0253365	0.11869
MMP24OS	2.7047	1.13732	0.509391	2.2327	0.0255687	0.119625
NFYA	185.545	0.543823	0.243752	2.23105	0.025678	0.119678
IGHMBP2	25.9108	0.686217	0.307523	2.23143	0.0256527	0.119678
TRIM60	2.5263	-1.31676	0.590104	-2.2314	0.0256546	0.119678
SIGLEC14	2.8268	-1.25504	0.563235	-2.22828	0.0258619	0.120357
METAP1	2.61493	-1.42552	0.640001	-2.22738	0.025922	0.120357
LMTK2	3.2684	-1.45969	0.655272	-2.22761	0.0259068	0.120357
TRPV4	2.84786	-1.438	0.646027	-2.22592	0.0260196	0.120657
DUX4	25.2134	0.581691	0.26159	2.22367	0.0261704	0.121203
AGO2	2.8563	-1.15428	0.51932	-2.22268	0.0262374	0.12136
ARL2	7.1598	0.744636	0.335098	2.22214	0.0262736	0.121375
SERPINF1	7.75168	0.853434	0.38496	2.21694	0.0266271	0.122273
SRSF3	4.39379	0.937711	0.423171	2.21592	0.0266973	0.122273
CDH11	4.68803	0.904179	0.407755	2.21746	0.0265919	0.122273
ATXN10	3.84105	1.02981	0.464302	2.21797	0.0265571	0.122273
ZKSCAN1	3.25111	1.05749	0.476642	2.21863	0.026512	0.122273
PAICS	2.66515	1.13068	0.510267	2.21586	0.0267014	0.122273
NFKBIL1	2.69514	-1.49402	0.674023	-2.21658	0.026652	0.122273
CFAP57	2.71826	-1.46186	0.660179	-2.21434	0.0268055	0.122597
RHPN2	3.34467	0.983541	0.444631	2.21204	0.0269638	0.123167
NPIPA1	8.58431	0.74403	0.336539	2.21082	0.027048	0.123398
UNC45B	3.06002	-1.12386	0.508694	-2.2093	0.0271536	0.123711
EVC	3.10557	1.04986	0.475295	2.20887	0.027184	0.123711
SGPP1	2.61658	-1.49918	0.679203	-2.20727	0.0272952	0.124063
CBFB	2.57116	1.04804	0.47502	2.20632	0.0273619	0.124212
SDCBP	2.79311	1.09256	0.497332	2.19685	0.0280315	0.126938
INSRR	2.8521	-1.57032	0.714776	-2.19694	0.0280248	0.126938
LRIG3	3.16785	0.994739	0.453468	2.19363	0.0282622	0.127824
BMF	3.52799	1.0753	0.49048	2.19234	0.0283553	0.128088
TAF1D	4.64262	0.946409	0.432068	2.19042	0.028494	0.128398
LHFPL2	2.55067	1.1264	0.514213	2.19053	0.0284861	0.128398
RAD23A	4.48731	0.901928	0.411918	2.18958	0.0285544	0.128513
RAP1B	3.16621	0.971103	0.444018	2.18708	0.0287367	0.129174
RRM2	2.67583	1.19693	0.548068	2.18391	0.0289689	0.130059
TIA1	3.6725	0.908679	0.416811	2.18007	0.0292522	0.13101
CLHC1	2.69725	-1.44481	0.662627	-2.18043	0.0292256	0.13101
CALM2	3.79948	0.876079	0.402274	2.17782	0.0294198	0.131314
MAGOH	3.77966	1.03102	0.473386	2.17797	0.0294086	0.131314
PPIC	2.73607	-1.42688	0.655219	-2.17771	0.0294276	0.131314
KIF24	2.79775	-1.40425	0.645417	-2.17572	0.029576	0.131816
TRIM51	10.6607	0.714963	0.328862	2.17405	0.0297011	0.132213
SMAD2	3.49898	1.12524	0.518476	2.17028	0.0299857	0.133194
CIAO2B	3.16968	-1.26724	0.583938	-2.17017	0.029994	0.133194
LENG1	59.2725	0.512355	0.23628	2.16842	0.0301264	0.13362
YBX3	3.8332	1.09993	0.507654	2.16669	0.0302584	0.134043
PTGFRN	3.47797	-1.21797	0.562279	-2.16614	0.0303007	0.134069
SEPHS1	4.12702	-1.02958	0.476323	-2.16152	0.0306548	0.135472
FSCN1	5.6924	0.845119	0.39162	2.15801	0.0309274	0.136512
PGLYRP1	2.51855	-1.44904	0.67191	-2.1566	0.0310365	0.136829
NOP53	3.91537	0.885829	0.4114	2.15321	0.0313025	0.137584
BRI3	2.91994	1.0113	0.46972	2.15298	0.0313203	0.137584
CCDC194	2.58573	-1.37825	0.640047	-2.15336	0.0312901	0.137584
HP1BP3	4.22803	0.942897	0.438129	2.1521	0.0313895	0.137723
PDE6C	2.5548	-1.43222	0.666748	-2.14807	0.0317082	0.138955
FBXO15	15.4874	0.75092	0.349697	2.14734	0.0317659	0.139042
CDPF1	3.87075	1.02276	0.476644	2.14575	0.0318931	0.139379
CBLC	2.73965	-1.26901	0.591496	-2.14543	0.0319189	0.139379
SYNCRIP	5.65574	0.739369	0.345821	2.13801	0.0325159	0.141481
SON	5.11646	0.94775	0.443163	2.1386	0.0324677	0.141481
PPP1CC	3.76622	0.996788	0.466122	2.13847	0.0324786	0.141481
ATP5MK	3.1031	0.955402	0.447071	2.13703	0.0325957	0.141497
SLC35E2A	3.70524	0.932056	0.436149	2.13701	0.0325968	0.141497
DBN1	6.99852	0.83655	0.392085	2.13359	0.0328762	0.142541
EPM2AIP1	3.00356	-1.3466	0.631523	-2.13231	0.032981	0.142827
ADAMTS3	2.68702	-1.26337	0.592743	-2.1314	0.0330566	0.142839
SEC24B	2.52454	1.09718	0.514786	2.13133	0.0330618	0.142839
UBE2L3	3.65772	0.898459	0.421903	2.12954	0.0332095	0.143276
OAZ2	3.15317	0.951197	0.446747	2.12916	0.0332409	0.143276
EMC10	5.3276	0.84002	0.394948	2.12692	0.0334271	0.143909
NDST1	3.96586	0.940721	0.44285	2.12424	0.03365	0.144699
ECE1	2.80734	1.06456	0.501546	2.12255	0.0337915	0.145137
PLEKHA4	11.2527	0.624467	0.294663	2.11926	0.0340688	0.145987
QRICH1	3.53301	-0.920679	0.434341	-2.11971	0.0340302	0.145987
CCDC141	2.82913	-1.33498	0.630211	-2.11831	0.034149	0.145989
LFNG	3.84853	0.987806	0.466265	2.11855	0.0341284	0.145989
DAD1	2.76644	1.04457	0.493504	2.11665	0.0342895	0.146249
WBP11	2.98373	0.987781	0.466613	2.11692	0.0342668	0.146249
SLC37A3	4.2532	-1.24308	0.587704	-2.11514	0.0344178	0.146625
NARF	2.59654	1.14596	0.542338	2.11299	0.0346014	0.147237
STARD7	3.7099	0.995567	0.472397	2.10748	0.0350761	0.149084
NEUROG2	2.98531	-1.33745	0.634896	-2.10657	0.0351553	0.149247
PNLIPRP3	6.30834	0.745297	0.354381	2.10309	0.0354576	0.15001
SESN3	3.66209	0.933203	0.443685	2.1033	0.0354394	0.15001
NBAS	2.74634	1.14664	0.545147	2.10337	0.0354336	0.15001
PITPNB	3.1176	0.99739	0.475816	2.09617	0.0360672	0.152413
ADRM1	2.95283	1.06385	0.508279	2.09304	0.0363453	0.153235
YOD1	2.72214	-1.10928	0.529896	-2.09338	0.0363149	0.153235
SKIL	3.20384	1.04321	0.498797	2.09146	0.0364867	0.153655
CREB3L2	3.5682	0.959845	0.459089	2.09076	0.0365494	0.153742
PRELID2	3.84395	-1.29153	0.617938	-2.09007	0.036612	0.153829
CSTF3	8.20877	0.660034	0.315947	2.08907	0.0367014	0.154028
TARDBP	3.68263	0.912842	0.437263	2.08762	0.0368317	0.154399
SCYL3	3.97282	-1.21832	0.583759	-2.08702	0.0368863	0.154451
ATP5F1B	5.94343	0.830699	0.398347	2.08537	0.037036	0.154901
IGF2BP2	3.86748	0.889282	0.42711	2.08209	0.0373341	0.155792
SLC19A1	3.46322	-1.4951	0.718014	-2.08227	0.037318	0.155792
COLGALT1	2.5157	1.04811	0.503633	2.0811	0.0374252	0.155995
TBCA	3.40627	0.963461	0.463212	2.07996	0.0375295	0.156252
TNK2	2.7218	1.01669	0.489055	2.07888	0.0376284	0.156309
RAD9A	2.72624	-1.20418	0.57915	-2.07921	0.0375978	0.156309
BCAR3	2.8982	-1.29552	0.623714	-2.07711	0.0377911	0.156807
ATP2A2	8.25656	0.682432	0.328746	2.07587	0.0379063	0.15702
ZNF470	11.393	0.654529	0.31555	2.07425	0.0380563	0.15702
SRSF4	2.88712	0.997436	0.480707	2.07494	0.0379925	0.15702
GPR62	2.58279	-1.32327	0.63794	-2.07429	0.0380522	0.15702
SEC13	2.58698	-1.31965	0.636028	-2.07483	0.0380022	0.15702
RPS15	12.6812	1.08897	0.525515	2.0722	0.038247	0.157629
PPP2R3C	2.76118	-1.22309	0.590986	-2.06957	0.0384925	0.158463
ALG2	3.59497	0.899672	0.434923	2.06858	0.0385856	0.15849
CCDC80	2.61603	1.01611	0.491164	2.06878	0.0385665	0.15849
MED10	2.78403	1.00668	0.487659	2.06432	0.0389877	0.159784
NKRF	2.60027	-1.44298	0.698915	-2.0646	0.0389609	0.159784
ST3GAL2	2.54234	0.991955	0.480804	2.06312	0.0391014	0.159942
PANX2	2.66894	-1.32354	0.641565	-2.06299	0.0391134	0.159942
PDGFRA	3.04681	-1.09247	0.529714	-2.06237	0.0391721	0.160004
ERLIN1	2.57491	1.04444	0.506606	2.06163	0.0392427	0.160114
HAUS5	3.22688	-1.1191	0.545471	-2.05163	0.040206	0.163862
CTBP1	3.68188	0.862789	0.421956	2.04474	0.0408806	0.166426
TLK2	5.45854	0.737067	0.360763	2.04308	0.0410449	0.16691
CCNY	4.26642	0.941854	0.461196	2.0422	0.0411317	0.167078
DHX15	3.17825	0.954849	0.468237	2.03924	0.0414259	0.168086
ZNF106	6.64026	-0.821425	0.403098	-2.03778	0.041572	0.168307
UBTD1	2.64363	0.953117	0.467682	2.03796	0.0415542	0.168307
ALDH3B2	4.39638	-1.09741	0.540781	-2.0293	0.0424275	0.171581
H2BC18	3.04774	0.898739	0.443172	2.02797	0.0425637	0.171942
ARMCX3	4.25017	0.837536	0.413219	2.02686	0.042677	0.172187
BCL9L	3.98885	0.917031	0.45253	2.02645	0.0427183	0.172187
MAP4	4.87976	0.863421	0.427029	2.02192	0.0431842	0.173684
SLC25A34	2.8804	-1.19281	0.589824	-2.02231	0.0431445	0.173684
GGPS1	2.68397	-1.33931	0.662639	-2.02118	0.0432612	0.173803
RNFT2	2.67425	-1.13004	0.55952	-2.01966	0.0434184	0.174244
ZBTB7B	6.29598	0.753737	0.374053	2.01506	0.0438988	0.175979
BRD4	5.90572	0.733813	0.364441	2.01353	0.0440591	0.176429
H4C8	2.71364	1.0252	0.50959	2.01181	0.0442404	0.176935
TOR3A	2.66478	-1.21046	0.601795	-2.01141	0.0442819	0.176935
UBE2Z	24.3376	0.666708	0.331814	2.00928	0.0445073	0.177642
P3H1	4.06966	0.88017	0.438721	2.00622	0.0448332	0.178748
ATP6V0C	2.76527	0.925956	0.462055	2.00399	0.0450707	0.1795
BNIP3L	5.15861	0.724346	0.361873	2.00166	0.0453212	0.180302
SSB	3.34301	0.884819	0.442398	2.00005	0.0454946	0.180796
SHISA5	3.49601	0.885504	0.443733	1.99558	0.0459798	0.182526
SNX19	2.57877	0.997318	0.500422	1.99295	0.0462667	0.183322
PML	2.68894	-1.36738	0.686153	-1.99283	0.0462803	0.183322
SLC1A7	2.51615	-1.19007	0.597618	-1.99135	0.0464425	0.183766
SNCA	3.78512	-0.94551	0.475466	-1.9886	0.0467458	0.184379
MTCH1	4.38855	0.787781	0.396104	1.98882	0.0467207	0.184379
TOP2A	2.61319	1.06955	0.537846	1.98857	0.0467483	0.184379
ELOVL4	2.76973	-1.28394	0.646095	-1.98724	0.0468962	0.184566
TSPAN32	2.70475	-1.44564	0.727311	-1.98765	0.0468499	0.184566
RHOV	7.46433	0.779893	0.392781	1.98557	0.0470814	0.1847
PSMB3	2.72598	0.946799	0.476836	1.98559	0.0470792	0.1847
DCDC2B	2.61473	-1.08922	0.548429	-1.98607	0.0470254	0.1847
KRTAP10-10	8.60885	0.691102	0.348473	1.98323	0.0473415	0.185522
CNIH2	2.70599	-1.07183	0.540725	-1.9822	0.0474567	0.185775
TOLLIP	2.93242	-1.36711	0.689959	-1.98143	0.0475431	0.185915
OLR1	3.05917	-1.20619	0.609385	-1.97935	0.0477762	0.186627
FBH1	2.76177	0.950039	0.481221	1.97423	0.048356	0.188691
REPIN1	4.34054	0.857674	0.434629	1.97335	0.0484562	0.188881
TMED2	2.89291	0.956867	0.485159	1.97227	0.0485783	0.189156
POU3F4	3.59679	0.911046	0.462371	1.97038	0.048795	0.189798
SMIM40	8.41052	0.579434	0.294293	1.9689	0.0489644	0.190111
SNX11	2.68655	-1.21684	0.618108	-1.96866	0.0489925	0.190111
DDHD2	2.63698	0.995429	0.505724	1.96832	0.0490308	0.190111
ACLY	3.86812	0.824161	0.419246	1.96582	0.0493198	0.19103
CDK2AP1	5.93619	0.828399	0.421811	1.96391	0.0495405	0.19148
NDUFB5	3.16532	0.910702	0.463652	1.96419	0.0495078	0.19148
SLC38A2	6.93643	0.735653	0.374698	1.96332	0.0496089	0.191532
SEM1	2.93121	0.939407	0.478606	1.9628	0.0496695	0.191532
CHPF2	3.14524	0.896076	0.456612	1.96244	0.0497107	0.191532
CCND3	2.72831	0.962951	0.490897	1.96161	0.0498075	0.191704
PSMC2	2.93881	-1.23077	0.628513	-1.95822	0.0502041	0.193028
PHGDH	2.85387	0.949863	0.485635	1.95592	0.0504746	0.193865
DKK1	3.68813	0.861352	0.440689	1.95455	0.0506357	0.1941
PTGES3	3.1734	0.895571	0.458209	1.9545	0.0506417	0.1941
TAS2R5	3.14143	-1.2686	0.649489	-1.95323	0.0507921	0.194473
PFKM	4.03443	-0.97494	0.499432	-1.9521	0.0509265	0.194711
DCBLD2	2.5101	0.953584	0.488563	1.95181	0.0509602	0.194711
EPN2	3.43652	0.903019	0.463284	1.94917	0.051275	0.195709
SEPTIN2	7.35538	0.846243	0.434686	1.94679	0.0515595	0.196591
RRBP1	3.80089	0.780718	0.401287	1.94553	0.0517109	0.196963
PCNP	3.05806	0.973117	0.500671	1.94363	0.0519405	0.197633
RASA3	5.10903	0.778654	0.401399	1.93985	0.0523979	0.198743
CSNK2B	4.16286	0.78189	0.403	1.94017	0.0523584	0.198743
RTRAF	3.56799	0.831015	0.428324	1.94015	0.052361	0.198743
ZNF226	2.73589	-1.22811	0.633376	-1.93898	0.0525033	0.198743
DHCR24	2.83752	-1.25431	0.646814	-1.93922	0.0524751	0.198743
SAFB2	2.85193	0.929858	0.48075	1.93418	0.0530906	0.200759
AGPAT1	3.81057	0.851146	0.44022	1.93346	0.0531798	0.200889
GSTK1	3.09178	0.884805	0.457961	1.93206	0.0533527	0.201335
SNU13	3.61654	0.898789	0.465481	1.93088	0.0534977	0.201675
WIPI1	3.89571	-0.971682	0.50421	-1.92714	0.0539626	0.203218
THY1	7.08327	0.977909	0.508204	1.92425	0.0543236	0.204368
HNRNPH3	6.34793	0.7633	0.396985	1.92274	0.0545124	0.204659
HYAL2	2.78464	0.934072	0.485744	1.92297	0.0544832	0.204659
ATP5F1D	3.20677	0.875587	0.455568	1.92197	0.0546099	0.204815
ACTN4	6.77159	0.680354	0.35445	1.91947	0.0549252	0.205367
NFIX	5.00416	-0.869872	0.453119	-1.91974	0.0548904	0.205367
FUBP3	2.88315	0.943173	0.491344	1.91958	0.0549116	0.205367
RBM17	2.83105	0.965576	0.503769	1.9167	0.0552755	0.206467
HMGCS2	2.52607	-1.21421	0.633762	-1.91588	0.0553808	0.20665
TIAL1	4.06155	0.801365	0.418621	1.9143	0.0555821	0.207016
CCNA1	2.76274	-1.2399	0.647731	-1.91422	0.0555918	0.207016
DDX58	2.60836	-1.04587	0.546687	-1.91311	0.0557334	0.207333
TARBP1	2.68805	-1.05705	0.553167	-1.91091	0.0560165	0.208175
PAK4	2.77279	-1.00154	0.524671	-1.90889	0.0562761	0.208928
GRHL1	3.09234	-1.06971	0.560942	-1.90699	0.0565219	0.209628
UPK3BL1	7.69247	0.690384	0.362259	1.90577	0.0566797	0.209818
TADA2A	2.70073	-1.24676	0.654221	-1.90571	0.0566874	0.209818
TAF6	4.64585	0.812889	0.427402	1.90193	0.0571798	0.211427
RANGRF	3.52052	0.93052	0.489968	1.89915	0.0575453	0.212137
AGAP1	4.27287	0.842417	0.443568	1.89918	0.0575405	0.212137
PPM1G	3.04885	0.858727	0.452002	1.89983	0.0574557	0.212137
ZNF467	2.63159	-1.04879	0.552418	-1.89854	0.0576249	0.212217
ANKRD36	10.6767	0.627713	0.330807	1.89752	0.0577595	0.212499
DLK1	2.98565	-1.07355	0.567615	-1.89134	0.0585788	0.215298
DNAJC14	3.54624	0.860284	0.455187	1.88996	0.0587635	0.215487
NOP56	3.34712	0.812315	0.429778	1.89008	0.0587469	0.215487
NUP62CL	2.74132	-1.20442	0.637382	-1.88964	0.0588065	0.215487
GPS2	3.07948	0.878936	0.465295	1.88899	0.0588938	0.215591
TLE5	7.40944	0.735607	0.38953	1.88845	0.0589659	0.21564
ZNF385A	2.6387	0.945635	0.501124	1.88703	0.0591566	0.216122
PPA1	2.69269	0.943398	0.500524	1.88482	0.059454	0.216992
PDZD7	2.71042	1.16109	0.616527	1.88328	0.0596629	0.217538
ATG5	2.60883	-1.16046	0.61646	-1.88246	0.0597732	0.217724
KDM4B	5.48028	0.674828	0.358727	1.88118	0.0599479	0.217928
TRAPPC2L	2.66206	-1.15532	0.614119	-1.88126	0.0599369	0.217928
CACNA2D1	3.16299	-0.997511	0.530593	-1.87999	0.060109	0.218297
SOX4	7.14863	0.645195	0.343668	1.87738	0.0604665	0.218939
C1QB	3.13774	-0.890186	0.474201	-1.87724	0.0604859	0.218939
C19orf53	2.56124	0.871105	0.464106	1.87695	0.0605246	0.218939
TEX30	2.65568	-1.13509	0.604554	-1.87756	0.0604408	0.218939
HNRNPM	4.94904	0.731914	0.39028	1.87535	0.060744	0.219516
WASHC1	6.76501	0.709731	0.378869	1.87329	0.0610283	0.220327
LARS1	3.19006	0.827793	0.442	1.87284	0.061091	0.220336
KLHDC2	2.79251	-1.04514	0.558345	-1.87186	0.0612258	0.220393
RND3	3.50762	-1.10617	0.590948	-1.87185	0.061227	0.220393
PUF60	4.60388	0.769626	0.412157	1.86732	0.0618575	0.222245
RAC1	3.33735	0.852718	0.456663	1.86728	0.0618625	0.222245
PPP1R12B	2.78264	-1.17446	0.630164	-1.86373	0.0623592	0.223155
CREBBP	3.84117	0.860425	0.46162	1.86392	0.0623323	0.223155
PSMF1	2.88708	0.879851	0.471835	1.86475	0.0622171	0.223155
CHAF1A	3.63516	-1.05188	0.564244	-1.86423	0.0622898	0.223155
ZKSCAN5	4.6104	-0.947008	0.509075	-1.86025	0.0628499	0.224452
CLIC6	2.99064	0.879702	0.472993	1.85986	0.0629052	0.224452
RING1	2.56885	0.903002	0.485325	1.86061	0.0627989	0.224452
H2AC20	2.97176	0.858253	0.461855	1.85827	0.0631303	0.225036
GAS1	3.71215	0.767665	0.413765	1.85532	0.0635511	0.226096
MTO1	2.51329	-1.09408	0.589658	-1.85545	0.0635315	0.226096
TEX9	5.07102	-0.803003	0.433329	-1.8531	0.0638676	0.226671
NHP2	3.04706	0.843071	0.455109	1.85246	0.0639598	0.226671
DNAJC15	2.83264	0.886713	0.478349	1.8537	0.0637828	0.226671
C1orf159	2.73829	-1.31536	0.710027	-1.85255	0.0639471	0.226671
RUNX3	5.81463	0.641118	0.346477	1.85039	0.0642571	0.227285
ZFTA	3.82701	0.785032	0.424215	1.85055	0.064234	0.227285
ADAM19	4.41502	0.74967	0.405848	1.84717	0.0647226	0.228712
MYO9B	3.00916	0.868272	0.470263	1.84635	0.0648407	0.228908
UGP2	3.22386	-1.01675	0.551099	-1.84495	0.0650441	0.229406
NBPF19	5.52108	0.68079	0.369405	1.84294	0.065338	0.230221
IP6K2	2.96296	0.845063	0.45896	1.84126	0.0655841	0.230866
TMEM248	3.61577	0.848415	0.46098	1.84046	0.0657008	0.231055
TTC4	2.9157	-1.11648	0.607268	-1.83854	0.0659835	0.231827
DYNC1H1	27.9528	0.496727	0.270485	1.83643	0.0662944	0.232474
PDZRN3	3.17186	-1.09352	0.595454	-1.83646	0.0662903	0.232474
NXF1	3.40177	0.866168	0.471893	1.83552	0.0664293	0.232502
SERINC2	2.7208	-1.14937	0.626061	-1.83588	0.0663756	0.232502
HMGB1	13.937	0.589313	0.321345	1.83389	0.0666698	0.233067
DAZAP1	3.64241	0.784939	0.428093	1.83357	0.0667177	0.233067
AGL	2.53818	-1.05091	0.573486	-1.8325	0.0668769	0.233401
UPP1	3.8386	0.795007	0.43418	1.83105	0.0670925	0.233709
SNX5	3.08174	0.885474	0.483529	1.83127	0.0670595	0.233709
TVP23B	3.13704	0.833818	0.455635	1.83001	0.067248	0.233806
GNA12	2.637	-1.16307	0.635422	-1.83039	0.0671913	0.233806
EHBP1L1	3.47763	-0.853608	0.466598	-1.82943	0.0673355	0.233889
UBE2V2	3.92249	0.770074	0.42116	1.82846	0.0674807	0.234004
CHCHD2	3.43534	0.820454	0.448739	1.82836	0.0674962	0.234004
PTK7	4.6557	0.743149	0.40657	1.82785	0.0675721	0.234046
EXT2	3.00036	-1.11802	0.612291	-1.82596	0.0678562	0.234808
KMT2A	3.17494	0.879091	0.482029	1.82373	0.068193	0.235751
LAMA4	6.6876	0.636123	0.348909	1.82318	0.0682766	0.235818
CTNNA1	5.17639	0.735179	0.403535	1.82185	0.0684781	0.236291
NPNT	3.49057	-0.877073	0.481717	-1.82072	0.0686491	0.236456
RRAGA	2.57603	0.896952	0.492646	1.82068	0.0686549	0.236456
ELOB	3.10893	0.816719	0.449329	1.81764	0.0691191	0.237609
RETNLB	2.87836	0.82835	0.455653	1.81794	0.0690731	0.237609
HEYL	3.64533	0.804716	0.442848	1.81714	0.0691962	0.237651
COX6C	2.51798	0.89065	0.490315	1.81649	0.0692959	0.237771
NAT8B	3.30466	-0.878431	0.483746	-1.81589	0.0693868	0.237861
C16orf78	8.51843	0.615677	0.339435	1.81383	0.069704	0.238304
SERPINE2	2.81804	0.862673	0.475688	1.81353	0.0697508	0.238304
ISG15	3.47721	-0.898209	0.495328	-1.81336	0.0697762	0.238304
PRDX4	2.87608	0.830344	0.457717	1.8141	0.0696625	0.238304
EXOC7	3.63291	0.861581	0.476092	1.80969	0.0703433	0.240018
CYP1B1	2.73834	-1.09401	0.604987	-1.80832	0.0705565	0.240522
MLF2	2.8793	0.79724	0.441474	1.80586	0.07094	0.241604
TMA16	2.69275	0.839606	0.465178	1.80491	0.0710883	0.241885
GRIN2A	5.48386	-0.794567	0.440914	-1.80209	0.071531	0.243166
RANBP1	4.53365	0.71362	0.39614	1.80143	0.0716346	0.243292
PSMD1	5.71232	0.695001	0.386023	1.80042	0.071795	0.243595
H1-4	3.36712	0.878874	0.488339	1.79972	0.0719048	0.243595
OSM	2.56654	-1.10454	0.61377	-1.7996	0.0719231	0.243595
FZD4	3.44049	-0.958636	0.533389	-1.79725	0.0722954	0.24458
B4GALT5	2.5763	0.849891	0.472969	1.79693	0.0723471	0.24458
UBXN1	2.59354	0.87528	0.488035	1.79348	0.0728962	0.246209
UBE4A	2.92058	-0.993692	0.55459	-1.79176	0.0731715	0.246685
H2AC11	2.86516	0.888535	0.495836	1.79199	0.0731341	0.246685
TMEM30A	16.2474	0.484682	0.270699	1.79048	0.073376	0.24692
NPIPB3	5.36813	0.633591	0.353812	1.79076	0.073332	0.24692
WNT10A	6.80582	0.686821	0.383818	1.78945	0.0735432	0.24703
DLL4	2.54164	-1.18639	0.662932	-1.78962	0.0735152	0.24703
SSBP1	2.79605	0.870428	0.48712	1.78689	0.0739558	0.247962
NFATC2	2.80689	0.971755	0.543813	1.78693	0.0739491	0.247962
CHRDL2	2.88831	-0.945868	0.529595	-1.78602	0.0740957	0.248204
UQCRB	3.86217	0.748575	0.419609	1.78398	0.0744265	0.249084
ATP5MG	3.37445	0.822614	0.462433	1.77888	0.0752591	0.251183
COPS6	2.79139	0.839018	0.471435	1.77971	0.0751234	0.251183
MSC	4.94655	0.937302	0.526821	1.77917	0.0752125	0.251183
MARCKS	11.457	0.574018	0.322763	1.77845	0.0753301	0.251192
BCL2L2	11.1208	0.614762	0.346047	1.77653	0.075646	0.251776
TUSC3	2.5871	0.869347	0.489576	1.77572	0.0757798	0.251776
CDK2	2.58136	-0.94448	0.531861	-1.7758	0.0757655	0.251776
H2AC12	2.70018	0.858871	0.483377	1.77681	0.0755991	0.251776
ANKRD11	3.41719	0.776643	0.437514	1.77513	0.0758771	0.251871
MAT2A	6.0517	-0.677996	0.382524	-1.77243	0.0763239	0.253125
FURIN	3.20411	0.788572	0.445672	1.7694	0.0768273	0.254246
KDM1A	2.57324	0.854005	0.482708	1.7692	0.0768611	0.254246
TCEA1	2.80265	0.873471	0.493725	1.76914	0.0768698	0.254246
ZNF577	4.79072	0.66732	0.377294	1.7687	0.0769439	0.254262
HIF1A	3.28208	0.845287	0.47879	1.76546	0.0774858	0.255822
SCAF11	3.23661	-0.922408	0.522791	-1.76439	0.0776662	0.256187
CCS	4.40573	0.78296	0.443992	1.76345	0.0778239	0.256476
BMERB1	9.51966	-0.882589	0.500773	-1.76245	0.0779927	0.256802
EIF2S3B	6.71888	0.615384	0.349441	1.76105	0.0782297	0.257351
RGS10	2.73309	0.827884	0.470513	1.75953	0.0784867	0.257965
TRIM28	7.08239	0.59415	0.338048	1.75759	0.0788173	0.258218
PCOLCE	5.14141	0.774895	0.440643	1.75856	0.0786526	0.258218
PPP1R3B	2.62609	0.877076	0.499045	1.75751	0.0788311	0.258218
CYP4X1	2.51029	-1.11962	0.637076	-1.75743	0.0788452	0.258218
SELENOW	4.77663	0.70618	0.401991	1.75671	0.0789677	0.258388
ATRX	7.61475	0.575978	0.328355	1.75413	0.0794078	0.259597
RCC1L	3.42172	0.808749	0.461544	1.75227	0.0797274	0.26041
ZNF776	6.42525	0.634075	0.36219	1.75067	0.0800029	0.261057
ATP1B3	2.97685	0.831107	0.474839	1.75029	0.080068	0.261057
ATG2A	2.63293	-0.94885	0.542921	-1.74768	0.0805201	0.262298
PRRC2B	7.69621	0.596914	0.341655	1.74713	0.0806155	0.262376
HTRA1	3.62006	0.793508	0.454544	1.74572	0.0808591	0.262721
SET	3.57797	0.77319	0.442914	1.74569	0.0808649	0.262721
ASGR2	3.17385	-1.03073	0.590613	-1.74519	0.0809518	0.262771
C9orf72	2.99678	-1.06292	0.610532	-1.74097	0.0816885	0.264928
POLR2J2	3.47098	0.815796	0.468831	1.74007	0.0818476	0.265209
RPL7L1	3.28619	0.80897	0.465199	1.73898	0.082039	0.265595
TALDO1	3.12496	0.780056	0.448885	1.73776	0.0822527	0.266052
EIF3K	4.56229	0.756901	0.435762	1.73696	0.0823947	0.266276
PLOD2	2.86891	-1.06616	0.614112	-1.73611	0.0825447	0.266526
SAE1	3.01734	0.788685	0.454411	1.73562	0.0826308	0.26657
MYOM1	2.73936	-0.955353	0.550581	-1.73517	0.0827103	0.266592
RAB7A	3.72463	0.733098	0.422809	1.73388	0.08294	0.267097
TAF15	5.27129	0.69613	0.401903	1.73208	0.0832586	0.267653
SLC29A4	2.69756	-1.04382	0.602508	-1.73245	0.0831931	0.267653
PDE4C	4.45828	0.707261	0.40849	1.7314	0.0833797	0.267808
CASP2	7.06571	0.681401	0.39419	1.72861	0.0838791	0.269011
ATP5IF1	2.99482	0.851872	0.492843	1.72849	0.083901	0.269011
TMEM213	11.8389	0.540778	0.313303	1.72605	0.0843381	0.270177
ELK1	18.217	0.575271	0.333431	1.72531	0.0844719	0.270369
IDH2	3.91239	0.687474	0.398597	1.72473	0.0845753	0.270464
ENAH	4.72139	0.688701	0.399531	1.72377	0.0847488	0.270547
C12orf43	2.72641	-1.02896	0.59679	-1.72416	0.0846795	0.270547
YIF1A	2.71877	-1.10676	0.64285	-1.72165	0.0851328	0.271537
CCDC88B	18.0111	0.480788	0.279483	1.72027	0.0853825	0.271624
SAP18	3.41951	0.711455	0.41357	1.72028	0.0853822	0.271624
RBBP4	2.93403	0.85948	0.49957	1.72044	0.0853525	0.271624
SUMO4	4.00399	0.727125	0.422875	1.71948	0.0855268	0.271645
TMPO	3.25687	0.778225	0.452608	1.71942	0.085537	0.271645
ZNF83	3.13632	0.801355	0.466284	1.7186	0.0856874	0.271887
NEMP2	2.51056	-0.955529	0.55628	-1.71771	0.0858491	0.272164
TRAPPC1	2.58845	0.81546	0.474933	1.717	0.0859792	0.272314
PCIF1	2.63855	-1.06566	0.620779	-1.71664	0.0860447	0.272314
PLEC	8.13733	-0.60251	0.351349	-1.71485	0.0863728	0.273117
TLN2	3.33212	-1.06104	0.619515	-1.71269	0.0867696	0.274135
ASAP3	2.69154	-0.905682	0.529283	-1.71115	0.0870538	0.27456
TCF23	2.52501	-1.0331	0.603705	-1.71126	0.0870322	0.27456
HNRNPCL3	12.8262	0.550509	0.322226	1.70846	0.0875517	0.275299
YAP1	2.86437	0.82183	0.481064	1.70836	0.0875699	0.275299
PPT1	2.70606	-0.859642	0.503227	-1.70826	0.0875884	0.275299
MINDY3	2.78903	0.791307	0.463218	1.70828	0.087584	0.275299
COX8A	3.90146	0.673118	0.394288	1.70717	0.0877896	0.275695
GORASP2	3.65415	0.722913	0.424083	1.70465	0.0882597	0.276935
HNRNPR	4.83977	0.667036	0.391698	1.70293	0.0885807	0.27723
ILK	2.64891	0.830441	0.487606	1.7031	0.0885497	0.27723
ELP2	3.47303	-0.905631	0.531707	-1.70325	0.0885212	0.27723
SIDT2	3.05722	-1.02754	0.60375	-1.70193	0.0887676	0.277579
ITGB1BP1	3.16894	0.758766	0.446325	1.70003	0.0891252	0.278459
MBD3	4.26432	0.703543	0.414098	1.69898	0.0893233	0.278766
CENPU	2.59989	0.833481	0.490657	1.6987	0.0893753	0.278766
NECTIN2	3.7179	0.708604	0.417251	1.69827	0.0894567	0.278783
PGAM2	2.94626	-0.952234	0.561075	-1.69716	0.0896662	0.279165
NDUFV3	3.17092	0.778873	0.45902	1.69682	0.0897316	0.279165
TSTD1	2.58928	-1.15495	0.680849	-1.69634	0.0898216	0.279208
PSMD13	3.04917	0.796776	0.469837	1.69586	0.0899128	0.279255
DVL1	12.5254	0.493954	0.291449	1.69482	0.0901097	0.27963
TNKS1BP1	3.286	0.79445	0.468991	1.69395	0.090274	0.279903
RAB28	5.86471	-0.743132	0.439364	-1.69138	0.0907644	0.280475
NPC2	4.81481	0.654722	0.386837	1.6925	0.0905502	0.280475
CBX4	2.98117	-0.913367	0.539768	-1.69215	0.0906181	0.280475
ARSF	3.45012	0.76347	0.45135	1.69153	0.090736	0.280475
ELK4	3.18073	0.747053	0.44228	1.68909	0.0912013	0.281588
UBE2B	3.0025	-1.00992	0.59815	-1.68841	0.0913322	0.281755
APIP	3.31831	-0.863604	0.51256	-1.68488	0.0920111	0.283611
THRA	2.80663	-0.863252	0.512717	-1.68368	0.0922433	0.284088
SMIM17	18.5403	-0.510189	0.303586	-1.68054	0.0928519	0.285483
CALD1	3.48651	0.812187	0.483243	1.6807	0.0928206	0.285483
ZNHIT1	3.57677	0.798541	0.475442	1.67958	0.0930397	0.285733
GPR18	4.47882	-1.01367	0.603617	-1.67932	0.0930891	0.285733
TMEM59	2.97334	0.754588	0.449561	1.6785	0.0932496	0.285986
SULF1	3.53387	-0.78311	0.466677	-1.67806	0.0933361	0.286012
YBX1	7.95983	0.819239	0.489097	1.675	0.0939336	0.287603
PNN	10.8557	0.563183	0.336499	1.67365	0.0941986	0.287737
EZR	3.52144	0.795443	0.475234	1.67379	0.0941717	0.287737
ZMYM3	2.81206	0.800252	0.478167	1.67358	0.0942126	0.287737
SPIN2A	5.14863	0.706005	0.422536	1.67088	0.0947458	0.288884
CCNL2	4.65157	0.65708	0.393181	1.67119	0.0946844	0.288884
UFC1	2.53399	0.814369	0.487767	1.66959	0.0950013	0.289422
TBCE	2.62116	-1.024	0.613669	-1.66865	0.0951867	0.289747
HSPG2	4.83434	0.652686	0.391345	1.6678	0.0953552	0.290019
RABL2B	2.73867	0.819669	0.491837	1.66654	0.0956052	0.290538
NUCKS1	7.81026	-0.629922	0.378137	-1.66586	0.0957418	0.290619
POMGNT2	2.69154	-0.993905	0.596719	-1.66562	0.09579	0.290619
SRA1	2.61105	0.849329	0.510275	1.66446	0.0960214	0.29108
XPO7	2.72942	0.851902	0.512566	1.66203	0.0965059	0.292307
ERBB2	2.79476	-0.989626	0.595827	-1.66093	0.0967277	0.292496
NUP107	2.68288	-1.10699	0.666392	-1.66117	0.0966793	0.292496
PDXDC1	4.59502	0.81308	0.4902	1.65867	0.0971821	0.293426
ZRANB2	3.2777	0.782548	0.471996	1.65795	0.0973269	0.293426
SSU72	3.05316	0.74958	0.451984	1.65842	0.0972327	0.293426
LPP	3.45864	0.782972	0.472292	1.65781	0.0973552	0.293426
TAB2	2.76653	-0.940714	0.567726	-1.65699	0.0975221	0.293687
RALY	4.3462	0.652553	0.394235	1.65524	0.0978765	0.294513
SEC62	5.93188	0.613389	0.370684	1.65475	0.0979753	0.294568
CMA1	4.89489	0.639164	0.386356	1.65434	0.0980583	0.294576
PLEKHG4	3.72486	0.751111	0.454287	1.65338	0.0982527	0.294919
PHC1	2.75473	0.800004	0.484034	1.65279	0.0983745	0.295043
VSIG4	2.51997	-0.997669	0.604023	-1.65171	0.0985947	0.295462
ARL6IP5	2.74432	0.789968	0.479032	1.64909	0.0991287	0.296577
H1-5	5.21258	0.686162	0.416042	1.64926	0.0990943	0.296577
DDX19A	2.89548	0.769924	0.467039	1.64852	0.0992457	0.296686
TNFRSF6B	3.02712	0.783524	0.475857	1.64655	0.0996495	0.297166
OTUD6B	2.97179	0.770357	0.467766	1.64689	0.0995814	0.297166
CYBA	3.09248	-1.04257	0.632991	-1.64705	0.0995475	0.297166
GUCA1B	2.5101	-0.983401	0.597579	-1.64564	0.0998373	0.297484
LCORL	2.89722	-0.925667	0.562738	-1.64493	0.0999833	0.297678
KHDRBS1	3.55811	0.747512	0.455254	1.64197	0.100597	0.299262
MRPL10	3.28907	-1.00623	0.613502	-1.64014	0.100976	0.299661
ARF4	3.11495	0.8078	0.492457	1.64035	0.100933	0.299661
SPINT2	3.25667	-0.766811	0.467401	-1.64059	0.100884	0.299661
PIAS1	2.53715	0.844093	0.515524	1.63735	0.101557	0.301142
GHITM	2.68588	0.822162	0.502737	1.63537	0.101971	0.302125
EFS	2.7135	-0.896422	0.548531	-1.63422	0.102212	0.302593
CHTOP	4.13862	0.680532	0.416551	1.63373	0.102316	0.302657
SFSWAP	3.40569	0.736109	0.45073	1.63315	0.102438	0.302773
PPFIBP1	3.20146	-0.854457	0.523621	-1.63182	0.102717	0.303353
COPB1	3.12601	0.742448	0.455094	1.63142	0.102803	0.303363
H3C7	3.03008	0.747171	0.458547	1.62943	0.103222	0.304112
CDC45	2.54713	-0.994066	0.609992	-1.62964	0.103178	0.304112
EXOSC3	5.06294	0.640444	0.393831	1.62619	0.103909	0.305829
NXN	2.78987	-0.852728	0.524466	-1.6259	0.103972	0.305829
NES	8.07037	0.563805	0.34762	1.6219	0.104825	0.307319
SKP1	7.67387	0.545127	0.336302	1.62094	0.10503	0.307319
DPPA2	4.29664	-0.746432	0.460292	-1.62165	0.104878	0.307319
FEM1A	2.76185	-0.952869	0.588027	-1.62045	0.105135	0.307319
MAFK	2.54501	-0.911213	0.561577	-1.6226	0.104676	0.307319
MYLIP	3.40322	-0.863193	0.532384	-1.62137	0.104938	0.307319
POLL	2.63755	0.818149	0.504357	1.62216	0.104769	0.307319
FGF17	2.85106	-0.911698	0.562641	-1.62039	0.105149	0.307319
COPA	4.35399	0.701602	0.433197	1.61959	0.10532	0.307576
GTF2H1	2.88007	-0.877246	0.542775	-1.61622	0.106046	0.309448
WDR6	2.90218	0.756558	0.468755	1.61397	0.106534	0.310624
STT3A	3.82321	0.716071	0.44396	1.61292	0.106763	0.310798
EAPP	2.796	-1.13773	0.70526	-1.6132	0.106701	0.310798
HSD17B3	2.8717	0.776662	0.481795	1.61202	0.106958	0.310873
MICAL1	2.63285	0.813862	0.504846	1.6121	0.10694	0.310873
PTP4A3	7.47175	0.575701	0.35744	1.61062	0.107262	0.311509
PSMA7	2.69413	0.824965	0.512502	1.60968	0.107467	0.311859
IL6ST	2.55548	0.768367	0.479111	1.60374	0.108772	0.315396
ZNF383	30.0252	0.409946	0.255955	1.60163	0.109236	0.31599
MYLK4	6.93731	-0.663061	0.41409	-1.60125	0.109322	0.31599
NPAP1L	5.45222	0.80885	0.505043	1.60155	0.109256	0.31599
ARL2BP	2.75808	0.808142	0.504511	1.60183	0.109192	0.31599
SNRPN	2.58177	0.742181	0.463788	1.60026	0.109541	0.316251
ZCCHC3	2.86811	0.760762	0.475565	1.5997	0.109665	0.316251
COG5	2.54545	0.808894	0.505661	1.59968	0.10967	0.316251
RGS3	4.1198	0.685948	0.428935	1.59919	0.109778	0.316314
BCLAF1	4.9866	0.659979	0.412828	1.59868	0.109892	0.316316
LIX1	2.71157	-0.905469	0.566481	-1.59841	0.109952	0.316316
ADPRS	10.4901	0.49154	0.308618	1.59271	0.111225	0.319578
KIAA2013	3.76678	0.762793	0.478974	1.59256	0.11126	0.319578
RPRD1B	15.5057	0.511897	0.32158	1.59182	0.111425	0.319803
HOOK3	3.35394	-0.836165	0.525918	-1.58992	0.111854	0.320719
SMPD4	2.6632	0.762507	0.479678	1.58962	0.111919	0.320719
FBRS	5.37381	0.683795	0.430445	1.58858	0.112156	0.321146
RBM39	4.28287	0.683442	0.430345	1.58813	0.112257	0.321186
PGM3	2.65857	0.819914	0.516449	1.5876	0.112377	0.321278
PPRC1	3.04483	-0.9456	0.596224	-1.58598	0.112743	0.322074
PSMD2	3.93106	0.675224	0.425862	1.58555	0.112842	0.322104
SPCS3	3.60749	0.660772	0.41714	1.58405	0.113182	0.322823
DNAJA1	3.72513	0.642354	0.405819	1.58286	0.113454	0.323098
UCHL1	2.66164	0.77174	0.487556	1.58287	0.11345	0.323098
ZIM3	3.39067	-0.954888	0.603441	-1.5824	0.113557	0.323141
NR1H3	3.02937	-0.789992	0.499365	-1.58199	0.113651	0.323156
EIF3A	26.4621	0.461856	0.292038	1.58149	0.113765	0.32323
CARD11	8.16288	-0.638654	0.404178	-1.58013	0.114077	0.323866
RANGAP1	2.64774	-0.882639	0.559069	-1.57877	0.11439	0.324502
PELI3	2.51362	-1.0165	0.644067	-1.57825	0.114507	0.324585
NFE2L1	5.39228	0.67125	0.42542	1.57785	0.114599	0.324595
PLS3	3.23067	0.738028	0.46786	1.57746	0.114691	0.324603
ECD	3.10377	-0.906719	0.575065	-1.57672	0.114859	0.324829
UPF3A	3.10066	0.735076	0.466599	1.57539	0.115166	0.324946
ZNF410	2.75658	-0.934094	0.592668	-1.57608	0.115006	0.324946
LBR	2.70119	0.806142	0.511656	1.57556	0.115128	0.324946
COX6A1	3.07122	0.669021	0.424938	1.5744	0.115395	0.325342
SPG7	7.47175	0.573362	0.364501	1.57301	0.115717	0.325999
SUPT5H	4.22914	0.657232	0.418115	1.57189	0.115975	0.326225
TCIM	3.29079	-0.823695	0.523891	-1.57227	0.115889	0.326225
LMAN1	4.32976	0.75991	0.484174	1.5695	0.116532	0.327539
CISD2	2.50541	-1.07441	0.684842	-1.56884	0.116686	0.32772
MYL9	25.3741	-0.477032	0.304552	-1.56634	0.117269	0.329107
ZMIZ1	3.71408	0.627255	0.400888	1.56466	0.117662	0.329957
DBT	3.09579	0.730818	0.467488	1.56329	0.117985	0.330611
CNOT1	2.75476	-0.788863	0.504778	-1.56279	0.118102	0.330685
SNRPD1	3.53364	0.689173	0.441355	1.56149	0.118407	0.331247
AAGAB	2.66457	0.809835	0.518863	1.56079	0.118573	0.331247
TMOD3	3.43863	0.719275	0.460751	1.56109	0.118502	0.331247
ERF	11.6959	0.537179	0.344502	1.55929	0.118927	0.331631
ARPC4	3.10558	0.734547	0.471147	1.55906	0.118982	0.331631
COL14A1	2.51024	0.831214	0.533023	1.55943	0.118894	0.331631
LRRN1	4.62859	-0.735324	0.471984	-1.55794	0.119247	0.331996
PCM1	4.39466	0.655848	0.421231	1.55698	0.119475	0.331996
CPSF7	3.17387	0.704393	0.45236	1.55715	0.119434	0.331996
MKKS	3.13313	-0.926272	0.594653	-1.55767	0.119312	0.331996
NCKAP1	2.85798	0.70615	0.45373	1.55632	0.119632	0.332181
CSDE1	6.83963	0.599287	0.385512	1.55452	0.12006	0.33269
GATD1	2.96755	0.687985	0.442603	1.55441	0.120088	0.33269
TNFRSF18	2.66974	-0.998976	0.642575	-1.55464	0.120031	0.33269
GPATCH2L	2.84537	-0.763965	0.49161	-1.55401	0.120183	0.332703
NOTCH2NLA	3.7786	0.699369	0.450307	1.55309	0.120401	0.333054
SEMA6B	4.68604	0.707638	0.456073	1.55159	0.120761	0.333296
GABBR1	3.61042	-0.94979	0.611861	-1.5523	0.120591	0.333296
CDK5RAP3	2.69162	0.778834	0.501955	1.5516	0.120758	0.333296
SPATA24	2.99893	-0.890551	0.574264	-1.55077	0.120957	0.333443
NDUFA9	2.93865	0.754128	0.486344	1.55061	0.120996	0.333443
ZNF254	2.60114	0.875645	0.564913	1.55005	0.121129	0.333559
MAP2K5	3.13815	0.716554	0.462524	1.54923	0.121327	0.333604
EMD	2.89791	0.750481	0.484418	1.54925	0.121323	0.333604
PHC2	7.79139	0.499524	0.322526	1.54879	0.121433	0.333646
BSDC1	2.71332	0.766241	0.495441	1.54658	0.121963	0.334852
CCDC8	5.93975	0.571568	0.370126	1.54425	0.122527	0.335108
PXN	4.27994	-0.743616	0.48136	-1.54482	0.122389	0.335108
SNAP29	4.37282	-0.796095	0.515638	-1.5439	0.122612	0.335108
PRMT6	4.22905	0.604862	0.391314	1.54572	0.122172	0.335108
OGA	3.75308	0.713022	0.462038	1.54321	0.12278	0.335108
KPNA1	2.61475	-0.982903	0.636934	-1.54318	0.122788	0.335108
SYT11	2.71804	0.761911	0.493326	1.54444	0.122483	0.335108
EXOSC7	2.58237	0.748841	0.485179	1.54343	0.122726	0.335108
RO60	2.54241	0.761209	0.493513	1.54243	0.122969	0.335353
SLC13A1	2.72856	-0.826574	0.536805	-1.5398	0.123609	0.336848
DMPK	4.01362	-0.752556	0.489277	-1.5381	0.124025	0.337731
GAMT	2.77653	-0.990533	0.644571	-1.53673	0.124359	0.338389
C1orf174	2.80405	0.767811	0.500656	1.53361	0.125126	0.340136
APOBEC3F	2.62784	0.749568	0.488839	1.53336	0.125186	0.340136
POU2F2	2.74719	-0.917905	0.599056	-1.53225	0.12546	0.340627
U2SURP	2.86491	0.703228	0.459292	1.53111	0.125741	0.341138
TTC19	2.84992	0.736756	0.481397	1.53045	0.125904	0.341328
NABP1	2.6791	-0.878598	0.574903	-1.52825	0.126449	0.342552
EN1	2.64182	-0.852079	0.557871	-1.52738	0.126667	0.34289
SETD7	3.58211	-0.757201	0.495903	-1.52691	0.126783	0.342949
ALG10B	3.72742	0.641763	0.420593	1.52585	0.127046	0.343409
FLNC	6.95925	0.562904	0.36907	1.5252	0.12721	0.343598
KLF6	2.93378	0.751974	0.493641	1.52332	0.127678	0.344504
GTPBP2	2.8008	0.709635	0.465914	1.5231	0.127733	0.344504
AHNAK	10.113	0.482185	0.31708	1.5207	0.128334	0.34587
ADPGK	2.69501	0.774693	0.510531	1.51743	0.129159	0.347837
UGT2B11	2.75051	0.737045	0.486178	1.516	0.12952	0.348553
TMEM214	2.73632	0.727319	0.480178	1.51469	0.129852	0.348681
CSTB	2.73148	0.762771	0.503473	1.51502	0.129768	0.348681
P2RY11	2.76199	-0.874989	0.577524	-1.51507	0.129755	0.348681
ALPL	2.69187	-0.917644	0.606544	-1.5129	0.130304	0.349638
FUBP1	5.83644	0.59631	0.394448	1.51176	0.130595	0.349907
LAPTM4B	2.93029	0.679501	0.449369	1.51212	0.130503	0.349907
FUS	9.23973	0.497684	0.330207	1.50719	0.131762	0.352776
PPP6R1	4.40521	0.564512	0.374859	1.50593	0.132085	0.353383
TMEM165	2.84223	0.723425	0.480798	1.50464	0.132418	0.354015
PRICKLE4	2.52607	-0.971047	0.645706	-1.50385	0.132619	0.354295
UQCRC1	2.86578	0.709106	0.472332	1.50129	0.133281	0.354812
CDK16	4.19914	0.656606	0.437339	1.50137	0.13326	0.354812
DAPK3	3.14509	0.689172	0.458716	1.50239	0.132995	0.354812
NCK2	2.92981	-0.870333	0.580036	-1.50048	0.13349	0.354812
HMG20B	2.93929	0.72213	0.481241	1.50056	0.133469	0.354812
KLF3	2.67819	0.762913	0.508373	1.50069	0.133435	0.354812
HAX1	2.58918	0.769577	0.512305	1.50218	0.133049	0.354812
SCO1	3.1423	-0.829778	0.553161	-1.50007	0.133597	0.354841
PLP2	3.15693	0.721561	0.481463	1.49868	0.133956	0.355535
ADNP	5.21491	0.603314	0.402855	1.4976	0.134238	0.355921
KLHDC8B	4.64688	0.574633	0.38376	1.49738	0.134295	0.355921
HK1	2.71695	-0.865414	0.578443	-1.49611	0.134625	0.356538
SLC25A11	2.79534	0.69002	0.461569	1.49494	0.134929	0.357085
MAPT	2.56623	-0.795366	0.532191	-1.49451	0.135041	0.357125
EXOSC1	2.62466	0.762504	0.51045	1.49379	0.135232	0.35737
THEM5	14.0277	0.457474	0.306509	1.49253	0.13556	0.357881
CYP2W1	3.3346	-0.751558	0.503623	-1.4923	0.13562	0.357881
COPE	2.64697	0.694974	0.465899	1.49168	0.135782	0.358051
TNNC1	7.15107	-0.703381	0.471803	-1.49084	0.136004	0.358379
ARHGEF40	4.87627	0.602209	0.404466	1.4889	0.136514	0.359464
CHMP1A	2.62574	0.749255	0.50337	1.48848	0.136625	0.359499
OR11H6	4.41382	-0.65515	0.44082	-1.48621	0.137224	0.3603
ANKHD1	2.98777	0.68388	0.460099	1.48638	0.137179	0.3603
ARHGEF10	2.60835	-0.8832	0.594155	-1.48648	0.137152	0.3603
NRSN2	3.65955	0.651819	0.439101	1.48444	0.137692	0.361085
ZUP1	2.71801	-0.752951	0.507265	-1.48433	0.13772	0.361085
P3H2	2.62338	0.792151	0.53489	1.48096	0.138617	0.363176
VDAC1	4.33264	0.642917	0.434478	1.47974	0.138942	0.363767
PTPN12	2.6081	0.713807	0.482541	1.47927	0.139069	0.363841
NDRG2	3.64793	-0.703475	0.4759	-1.4782	0.139354	0.364143
PTDSS1	3.27125	-0.832969	0.563543	-1.47809	0.139383	0.364143
SEH1L	2.66282	-0.811849	0.549637	-1.47706	0.139659	0.364604
CYB5R1	3.34674	0.684165	0.463878	1.47488	0.140244	0.365592
SLC5A5	4.00298	-0.767841	0.520733	-1.47454	0.140336	0.365592
ZNF678	3.70624	0.632041	0.428485	1.47506	0.140196	0.365592
CBX2	2.67216	-0.766207	0.519938	-1.47365	0.140576	0.365956
QSOX1	2.59787	0.72715	0.494245	1.47123	0.141228	0.367393
CCDC68	5.82923	-0.561774	0.382138	-1.47008	0.14154	0.367424
UBXN6	3.39769	0.706658	0.480514	1.47063	0.141392	0.367424
DECR1	2.53167	0.739837	0.503221	1.4702	0.141507	0.367424
PCNX4	2.54316	0.726466	0.494528	1.46901	0.14183	0.367916
RUVBL2	15.1762	0.39759	0.270949	1.4674	0.142268	0.368792
KLRC2	6.37294	0.492311	0.335883	1.46572	0.142724	0.369711
CTTN	9.67936	0.50131	0.342114	1.46533	0.142831	0.369727
TXNDC5	3.40894	0.813057	0.555418	1.46386	0.143231	0.370502
TIMM44	2.55181	0.739821	0.505663	1.46307	0.143448	0.370803
GPM6A	2.98161	-0.753323	0.51528	-1.46197	0.14375	0.371059
FAM189A1	2.5108	-0.883753	0.604477	-1.46201	0.143737	0.371059
ERCC3	3.24641	-0.749318	0.51374	-1.45856	0.144687	0.373216
ZBTB12	4.53181	-0.743178	0.50992	-1.45744	0.144995	0.373746
KRTAP5-8	3.32352	-0.817676	0.561315	-1.45672	0.145195	0.373999
CDH13	2.68227	0.745935	0.512538	1.45538	0.145565	0.37469
ATRAID	2.84002	-0.755909	0.520486	-1.45231	0.146414	0.376612
ZNF827	2.61106	0.713412	0.491828	1.45053	0.14691	0.377357
NID2	2.58393	0.710437	0.489695	1.45078	0.146842	0.377357
HDAC2	3.00773	0.670128	0.462317	1.4495	0.147198	0.377796
ATP5F1C	2.91633	0.692364	0.477762	1.44918	0.147287	0.377796
SH3BGRL	2.92517	-0.773939	0.534378	-1.4483	0.147534	0.378164
FAM32A	2.63082	0.688607	0.476024	1.44658	0.148014	0.378955
UBXN7	2.53194	0.728002	0.503299	1.44646	0.148049	0.378955
EWSR1	7.91808	0.448127	0.310174	1.44476	0.148525	0.379644
PDCD6	4.27884	0.636022	0.440222	1.44478	0.148521	0.379644
TGOLN2	2.50772	0.722137	0.500198	1.4437	0.148823	0.38014
AHCYL1	3.19716	0.632536	0.438497	1.44251	0.149159	0.380735
PEG10	7.79651	-0.644534	0.448223	-1.43797	0.150441	0.383473
ZC3H13	4.07222	0.60258	0.41901	1.43811	0.150404	0.383473
NOL7	2.58054	0.69579	0.484042	1.43746	0.150587	0.38358
MYL12B	7.48958	0.493987	0.343902	1.43642	0.150884	0.384067
BRD7	2.50533	-0.783903	0.546506	-1.43439	0.151461	0.385269
RANBP9	2.93613	-0.904988	0.631208	-1.43374	0.151647	0.385474
SEC14L1	3.5594	0.67386	0.470178	1.4332	0.1518	0.385597
CEPT1	3.60103	-0.696906	0.486578	-1.43226	0.15207	0.386015
C9orf47	3.93112	-0.858755	0.600066	-1.4311	0.152402	0.38659
CEP83	2.59953	-0.756349	0.528721	-1.43053	0.152566	0.38674
ZNF208	7.13177	0.574488	0.402042	1.42892	0.153026	0.387638
UBE2V1	3.95917	0.583342	0.408725	1.42722	0.153515	0.388233
CNOT7	2.54049	0.681275	0.477416	1.427	0.153578	0.388233
THOP1	2.78406	-0.80261	0.562243	-1.42752	0.153431	0.388233
CELF2	2.54233	0.754842	0.529637	1.4252	0.154098	0.389278
ACSL4	3.45901	0.606465	0.426075	1.42338	0.154627	0.390346
ZNF267	20.079	0.444979	0.313113	1.42114	0.155276	0.390468
STMN3	5.58894	0.578202	0.406902	1.42099	0.155321	0.390468
CTSA	4.69385	0.524465	0.36878	1.42216	0.15498	0.390468
MDH2	2.9299	0.713089	0.501948	1.42064	0.155421	0.390468
CDC27	3.05405	0.678145	0.476866	1.42209	0.155001	0.390468
SNRPA1	2.59261	-0.730056	0.513742	-1.42106	0.155301	0.390468
TWNK	2.54395	-0.818674	0.57569	-1.42207	0.155005	0.390468
LDHC	4.02192	0.610142	0.42988	1.41933	0.155803	0.390892
RRN3	2.75941	-0.793874	0.559236	-1.41957	0.155734	0.390892
RAB19	3.8053	0.614081	0.433094	1.41789	0.156222	0.391045
C4orf54	2.6541	-0.763343	0.538179	-1.41838	0.15608	0.391045
KDM2A	3.54734	-0.648075	0.457144	-1.41766	0.15629	0.391045
PMM2	2.64361	0.70821	0.499453	1.41797	0.156199	0.391045
IFIT1	2.74114	-0.818995	0.578305	-1.4162	0.156717	0.391846
OR7A10	2.52122	0.701092	0.495188	1.41581	0.156832	0.391866
STARD4	2.68557	-0.811257	0.573256	-1.41518	0.157017	0.392062
NOLC1	2.53811	0.702316	0.496951	1.41325	0.157582	0.393205
HEY2	3.7309	0.641235	0.454163	1.4119	0.157979	0.393358
CDC25B	2.98349	-0.886274	0.627578	-1.41221	0.157887	0.393358
NME3	2.50545	0.691267	0.489387	1.41252	0.157798	0.393358
CNOT2	2.90029	0.679599	0.481444	1.41158	0.158073	0.393358
SRSF9	7.05055	0.542233	0.384352	1.41077	0.158312	0.393686
PLAUR	3.10108	-0.679291	0.481911	-1.40958	0.158665	0.393765
PNISR	5.06605	0.555407	0.394119	1.40924	0.158766	0.393765
TMOD2	2.74828	-0.74151	0.525891	-1.41001	0.158538	0.393765
CLCN6	2.6884	0.685442	0.486401	1.40921	0.158773	0.393765
CBX6	4.00954	0.622642	0.441983	1.40875	0.15891	0.39384
PPP1CA	2.9959	0.625112	0.444682	1.40575	0.159798	0.395772
ZNF723	20.4473	0.381093	0.271772	1.40226	0.160839	0.398081
EFEMP2	3.5089	0.60444	0.431358	1.40125	0.16114	0.398557
LAMTOR4	2.89014	0.684409	0.488795	1.4002	0.161455	0.399067
SGSM3	2.9084	0.665894	0.475814	1.39948	0.161668	0.399326
PPP2CB	3.39466	-0.784266	0.560707	-1.39871	0.1619	0.39963
ITPRID2	20.6373	0.389204	0.278707	1.39646	0.162575	0.400987
SHD	3.16307	0.711107	0.509466	1.39579	0.162778	0.400987
C17orf58	4.15247	-0.63341	0.453732	-1.396	0.162715	0.400987
SEMA4C	2.63687	-0.784507	0.562333	-1.39509	0.162988	0.401234
CRKL	3.3483	-0.878225	0.629923	-1.39418	0.163264	0.401645
TUBAL3	3.96852	-0.797698	0.572321	-1.39379	0.16338	0.40166
TAS1R3	2.74508	0.647756	0.465134	1.39262	0.163734	0.402262
HMX1	7.26695	-0.567682	0.408574	-1.38942	0.164705	0.404106
WASF2	3.18821	0.71265	0.512797	1.38973	0.164611	0.404106
AP3B1	2.50809	-0.763767	0.549902	-1.38892	0.164858	0.404211
AXL	2.79345	-0.694669	0.500325	-1.38843	0.165005	0.404301
MALRD1	8.93537	0.47378	0.341441	1.38759	0.165261	0.404389
SH3BP2	2.59183	0.686433	0.494636	1.38775	0.165212	0.404389
SLC39A7	4.1623	0.545144	0.393236	1.3863	0.165655	0.405082
RBM8A	3.35943	0.6254	0.451389	1.3855	0.165899	0.405409
SOD1	4.47188	0.58779	0.424418	1.38493	0.166073	0.405564
RC3H2	2.65486	0.647027	0.467775	1.3832	0.166604	0.406588
PLXDC2	2.71694	-0.786955	0.569709	-1.38133	0.167178	0.407718
PRMT1	3.63926	0.636982	0.461616	1.3799	0.167619	0.408522
MZT2B	4.8494	0.902491	0.654223	1.37948	0.167745	0.408559
PRRT2	9.28721	0.449634	0.326524	1.37703	0.168502	0.408811
SFPQ	9.77503	0.43448	0.315393	1.37758	0.168332	0.408811
UQCRC2	4.51043	0.564439	0.409995	1.3767	0.168606	0.408811
FADS1	4.98811	0.598742	0.434749	1.37721	0.168447	0.408811
CAMKK1	2.69605	-0.801989	0.581839	-1.37837	0.168089	0.408811
PIGS	2.69927	0.652594	0.473649	1.3778	0.168265	0.408811
SAT2	2.51572	-0.773313	0.561747	-1.37662	0.168629	0.408811
ZMIZ2	3.58173	0.589515	0.42934	1.37307	0.16973	0.411209
TAOK3	2.63687	-0.884803	0.645448	-1.37083	0.170426	0.412623
ACAA1	5.38759	0.514176	0.37533	1.36993	0.170709	0.412762
ARPC2	5.0693	0.543635	0.396769	1.37016	0.170638	0.412762
ZNF260	3.56729	0.609472	0.445058	1.36942	0.170868	0.412875
MYBPHL	2.58163	-0.781188	0.57063	-1.36899	0.171002	0.412926
ANKRD65	6.72648	-0.49017	0.358535	-1.36715	0.171579	0.413669
ARFGAP1	3.80491	0.605407	0.443012	1.36657	0.171761	0.413669
PGAM4	2.54678	0.637024	0.466082	1.36676	0.1717	0.413669
DUSP14	2.99473	-0.861548	0.630286	-1.36692	0.171652	0.413669
SNRNP70	4.9469	0.563498	0.412458	1.3662	0.171878	0.413679
DTNBP1	3.66303	0.604301	0.442483	1.3657	0.172032	0.413779
B4GALT1	3.32621	0.621295	0.455203	1.36488	0.172292	0.414133
RUNX1	4.76321	0.630354	0.463059	1.36128	0.173424	0.416582
PROSER1	2.90113	-0.760117	0.558543	-1.36089	0.173547	0.416604
GPRC5C	2.75098	-0.754473	0.555187	-1.35895	0.174162	0.417786
TTC14	2.78661	0.654831	0.482084	1.35833	0.174358	0.417786
TUBG2	2.7261	0.643901	0.474064	1.35826	0.174381	0.417786
ZFC3H1	3.48314	0.597725	0.440291	1.35757	0.174601	0.41804
WRNIP1	2.63795	0.698787	0.515901	1.3545	0.175578	0.420104
IFITM3	3.58755	0.662739	0.489543	1.35379	0.175803	0.420368
CLTB	11.3731	-0.63636	0.471041	-1.35097	0.176706	0.420414
PGK1	5.54653	0.578856	0.428721	1.35019	0.176954	0.420414
NBPF12	6.79534	0.507192	0.375463	1.35084	0.176746	0.420414
GPR87	3.26001	-0.664539	0.492552	-1.34918	0.17728	0.420414
NPEPPS	3.57891	0.624969	0.463096	1.34955	0.177162	0.420414
ADGRA3	3.20803	0.562049	0.415939	1.35128	0.176606	0.420414
ITGA7	2.6699	-0.768237	0.568874	-1.35045	0.176871	0.420414
CHD3	3.67683	0.616537	0.456932	1.3493	0.177241	0.420414
WDR1	3.11863	0.603732	0.447752	1.34836	0.177541	0.420414
PPIG	2.60572	0.669809	0.496633	1.3487	0.177433	0.420414
ZNF521	3.55182	0.594152	0.439256	1.35263	0.176173	0.420414
PKNOX1	2.91082	-0.663403	0.491823	-1.34887	0.17738	0.420414
ZNHIT3	2.71583	0.660587	0.489406	1.34977	0.177089	0.420414
PLXNB1	2.54743	-0.706122	0.522553	-1.35129	0.176602	0.420414
FAAP20	2.73408	0.665426	0.491985	1.35253	0.176205	0.420414
GNG10	3.11546	0.620833	0.460646	1.34774	0.177741	0.420615
ARF6	2.7405	0.632691	0.469814	1.34668	0.178082	0.421151
THAP4	2.65682	0.726289	0.539482	1.34627	0.178215	0.421194
RASA4	2.74647	0.666381	0.495383	1.34518	0.178566	0.421752
SNRPG	2.79071	-0.80223	0.596533	-1.34482	0.178683	0.421756
CREBZF	3.57067	0.597797	0.445022	1.3433	0.179176	0.422647
KAT7	3.40717	0.614039	0.457728	1.34149	0.179761	0.422669
TM9SF2	3.86907	0.60588	0.451585	1.34167	0.179702	0.422669
PCDH11X	2.85706	-0.755505	0.562812	-1.34238	0.179474	0.422669
IVNS1ABP	2.58961	-0.677847	0.504879	-1.34259	0.179404	0.422669
PLK2	2.57212	-0.734899	0.547538	-1.34219	0.179535	0.422669
CD9	3.55985	0.600452	0.4485	1.3388	0.180636	0.424454
ATAD3A	10.536	0.432085	0.323134	1.33717	0.181168	0.424503
AKR1E2	3.68131	0.580748	0.43436	1.33702	0.181217	0.424503
SUB1	3.33575	0.599196	0.448033	1.33739	0.181094	0.424503
PIN1	2.89436	-0.688374	0.514583	-1.33773	0.180983	0.424503
PPM1H	2.89432	0.797196	0.596275	1.33696	0.181235	0.424503
EVL	9.68643	0.408892	0.306395	1.33453	0.182032	0.424746
CALM1	3.52251	0.593912	0.445038	1.33452	0.182034	0.424746
TATDN1	3.06129	-0.709412	0.531572	-1.33455	0.182022	0.424746
RASA1	2.9045	0.60687	0.45439	1.33557	0.18169	0.424746
MAST2	2.52373	-0.803967	0.601778	-1.33599	0.181554	0.424746
IARS2	2.66147	0.659128	0.493721	1.33502	0.18187	0.424746
TOB2	2.79794	0.642773	0.482057	1.33339	0.182402	0.425335
MYOG	6.27617	0.522139	0.392067	1.33176	0.182939	0.425781
EIF2S2	2.81183	0.680295	0.510827	1.33175	0.182942	0.425781
ACAP3	3.36233	-0.710735	0.533466	-1.3323	0.182763	0.425781
MYOZ2	2.62919	-0.786632	0.591128	-1.33073	0.183278	0.426293
H2AC14	2.72239	0.6471	0.486486	1.33015	0.183468	0.426465
TXNIP	5.46056	0.554881	0.417435	1.32926	0.183761	0.426875
ATP6AP2	3.32469	0.611641	0.460325	1.32872	0.183942	0.427025
UBE2Q1	2.50454	-0.706876	0.532205	-1.3282	0.184111	0.427147
CTNND1	3.06116	-0.725882	0.546815	-1.32747	0.184352	0.427389
LTV1	3.02177	0.599504	0.451712	1.32718	0.184449	0.427389
RNF113A	8.0563	0.459957	0.346886	1.32596	0.184853	0.427786
ZNF320	2.66846	-0.750423	0.565826	-1.32624	0.184759	0.427786
ZNF28	4.62325	0.554716	0.418562	1.32529	0.185075	0.42803
SOX11	3.363	-0.67173	0.507023	-1.32485	0.18522	0.428096
NDN	2.56652	0.663015	0.501787	1.32131	0.186399	0.430549
ARHGEF1	3.82551	0.565852	0.428865	1.31942	0.18703	0.431734
ZSCAN30	2.83111	-0.896632	0.680071	-1.31844	0.187357	0.432217
SPC24	3.13482	-0.638902	0.484869	-1.31768	0.187611	0.432532
DYNC1I2	3.01439	0.628898	0.477644	1.31667	0.18795	0.433041
C1QTNF3	3.29456	-0.708795	0.539301	-1.31428	0.188751	0.434612
SNURF	5.0661	0.470294	0.357939	1.3139	0.188882	0.434641
KIF1B	4.40015	-0.588884	0.44966	-1.30962	0.190324	0.437686
ZNF655	2.93743	0.628614	0.480663	1.30781	0.190939	0.438825
UBE2G1	2.81171	0.628071	0.480572	1.30692	0.191239	0.439239
ZBTB7A	2.51162	0.713215	0.546613	1.30479	0.191965	0.44063
VBP1	2.89836	-0.741362	0.56846	-1.30416	0.19218	0.440848
ENTPD2	2.86507	-0.650723	0.499337	-1.30317	0.192515	0.441341
AVEN	4.00271	0.534972	0.410846	1.30212	0.192875	0.441889
FAM118A	3.25446	-0.644982	0.495646	-1.3013	0.193157	0.441984
LMNB2	3.00404	0.616218	0.473475	1.30148	0.193094	0.441984
CCDC110	6.28384	0.456799	0.351639	1.29905	0.193925	0.442713
CSRNP2	4.36492	-0.56443	0.434525	-1.29896	0.193958	0.442713
ALKBH2	2.83504	-0.665494	0.512139	-1.29944	0.193793	0.442713
SHE	2.62099	-0.6908	0.531692	-1.29925	0.193859	0.442713
PET117	3.70664	-0.592264	0.456147	-1.29841	0.194148	0.44287
SMAD4	3.55215	-0.71243	0.548916	-1.29788	0.194327	0.443003
CHRNB1	3.37131	0.609639	0.47001	1.29708	0.194605	0.443361
ACBD3	2.80964	0.618508	0.47732	1.29579	0.195047	0.443804
ZNFX1	2.70408	-0.663715	0.51239	-1.29533	0.195206	0.443804
PSMB10	2.51413	-0.765399	0.590993	-1.29511	0.195283	0.443804
SIRT3	2.849	-0.715662	0.552156	-1.29612	0.194933	0.443804
NCAM1	2.73465	-0.687361	0.530906	-1.29469	0.195426	0.443853
PABPC4	5.16217	0.539059	0.416649	1.2938	0.195736	0.444281
CCT7	3.32131	0.540752	0.418846	1.29105	0.196686	0.445886
TTC39B	2.55319	-0.792853	0.614095	-1.29109	0.196672	0.445886
CREB3L1	3.25526	0.666658	0.516661	1.29032	0.196939	0.446185
KHSRP	4.01604	0.552213	0.428343	1.28918	0.197334	0.446775
GUCD1	2.64006	-0.740628	0.574634	-1.28887	0.197443	0.446775
NEGR1	6.17863	0.532867	0.413606	1.28835	0.197626	0.446912
TEDC2	4.31532	-0.579202	0.449732	-1.28788	0.197786	0.446999
ADAM9	3.35463	-0.71575	0.556414	-1.28636	0.198317	0.447577
NDUFS2	3.74019	-0.615099	0.478259	-1.28612	0.198401	0.447577
CTNNBL1	3.16126	0.682289	0.530787	1.28543	0.198643	0.447577
ATOH8	2.64294	-0.722444	0.561902	-1.28571	0.198544	0.447577
CRTC2	2.76571	0.604529	0.470303	1.2854	0.198652	0.447577
BATF3	3.73601	-0.598861	0.466185	-1.2846	0.198933	0.447934
TRIM17	13.6068	0.454987	0.354777	1.28246	0.199681	0.448308
TRDN	2.61032	-0.699859	0.546047	-1.28168	0.199954	0.448308
SCRIB	2.63134	-0.676186	0.527362	-1.2822	0.199771	0.448308
TSPAN9	3.00227	-0.674948	0.525772	-1.28373	0.199237	0.448308
SNF8	2.64797	0.646205	0.503936	1.28232	0.199732	0.448308
SAP30BP	2.9311	-0.736524	0.574591	-1.28182	0.199905	0.448308
HEY1	3.32141	0.635258	0.495291	1.28259	0.199634	0.448308
PRDM5	7.86449	0.487841	0.381147	1.27993	0.20057	0.449191
DIO3	4.00237	0.552855	0.431963	1.27986	0.200593	0.449191
YTHDF3	3.20428	0.585933	0.458048	1.2792	0.200828	0.449442
CSK	3.07656	0.579543	0.453188	1.27881	0.200963	0.44947
PSMD8	3.07285	0.565474	0.442349	1.27834	0.201128	0.449471
FRMD7	2.52267	-0.700584	0.548287	-1.27777	0.201331	0.449471
CCDC122	3.39169	0.566936	0.443637	1.27793	0.201275	0.449471
IGF2BP1	3.03962	0.586884	0.459962	1.27594	0.201977	0.45064
PRPF39	3.17069	0.598317	0.469839	1.27345	0.202857	0.452054
GNAT2	2.86651	-0.70797	0.555933	-1.27348	0.202847	0.452054
TRMT10A	3.07856	0.657291	0.516353	1.27295	0.203037	0.452178
MARCHF7	3.08334	0.629803	0.495455	1.27116	0.203672	0.453319
MYEF2	2.77549	0.657002	0.517036	1.27071	0.203832	0.4534
MTUS1	2.70905	-0.794669	0.625657	-1.27014	0.204036	0.453579
PLPP4	3.48717	0.617476	0.486326	1.26967	0.204201	0.45367
DUS1L	4.06714	0.51407	0.40519	1.26871	0.204544	0.454156
PRPF4B	4.46945	0.558153	0.440194	1.26797	0.204808	0.454468
GRIN2B	4.11359	0.525032	0.414302	1.26727	0.205059	0.45475
PAPOLA	3.35811	0.579481	0.457507	1.2666	0.205297	0.454844
PABPC3	2.86634	-0.63387	0.500507	-1.26646	0.20535	0.454844
CAPN15	3.87546	0.534625	0.423068	1.26369	0.206343	0.456768
ZC4H2	3.31666	-0.625973	0.495596	-1.26307	0.206563	0.45698
LPAR2	9.49102	0.394156	0.312317	1.26204	0.206935	0.457486
CARM1	4.28552	0.546223	0.433142	1.26107	0.207283	0.457486
ZNF444	3.78613	0.526019	0.417098	1.26114	0.207259	0.457486
NSA2	2.51151	0.61709	0.489435	1.26082	0.207373	0.457486
SLC16A13	2.61736	-0.833163	0.660871	-1.2607	0.207415	0.457486
MYL12A	3.09335	0.565308	0.448933	1.25923	0.207949	0.458335
SLC35D1	4.416	-0.516831	0.410527	-1.25894	0.20805	0.458335
DMAC2	2.8976	-0.689965	0.549409	-1.25583	0.209177	0.460465
FARP1	2.91058	0.609193	0.48542	1.25498	0.209486	0.460465
PLIN2	3.27333	-0.697664	0.555685	-1.2555	0.209296	0.460465
HERC4	2.65857	0.624301	0.497495	1.25489	0.209519	0.460465
THOC5	2.52873	0.662923	0.528898	1.2534	0.210059	0.461194
PPIP5K2	2.71978	0.625358	0.498975	1.25328	0.210102	0.461194
RPL39L	2.55875	-0.824712	0.658239	-1.25291	0.21024	0.46122
MEGF8	9.15181	0.485976	0.388147	1.25204	0.210555	0.461635
BBS1	3.01485	0.582822	0.466886	1.24832	0.211915	0.464207
BAP1	2.67042	-0.645521	0.517188	-1.24814	0.211981	0.464207
INSYN2B	3.25889	-0.578333	0.463695	-1.24723	0.212314	0.464659
NOP58	4.24808	0.546612	0.438944	1.24529	0.213025	0.465937
TMEM263	3.38883	0.575718	0.462512	1.24476	0.213219	0.466083
TPM3	9.46246	-0.465468	0.374109	-1.24421	0.213424	0.466253
LRP5	3.72426	-0.539063	0.433656	-1.24307	0.213843	0.466614
FDFT1	2.67076	0.645306	0.519037	1.24328	0.213766	0.466614
TRAK1	4.23264	0.509833	0.410824	1.241	0.214606	0.467653
C21orf58	3.17917	-0.618194	0.498247	-1.24074	0.214702	0.467653
NKTR	3.21055	0.539947	0.43498	1.24132	0.214489	0.467653
ACTR10	4.84746	0.508022	0.4097	1.23998	0.214981	0.467983
NAT9	3.1022	-0.65707	0.531223	-1.2369	0.216123	0.469566
PTPRS	3.99526	0.501896	0.405667	1.23721	0.216009	0.469566
MAGEF1	3.04538	0.625521	0.505822	1.23664	0.21622	0.469566
TCF25	2.91073	0.619513	0.500749	1.23717	0.216023	0.469566
SIGIRR	12.5119	0.418024	0.338284	1.23572	0.216563	0.469753
CACNG1	3.01914	0.574686	0.464971	1.23596	0.216473	0.469753
VPS52	2.75846	-0.642893	0.520603	-1.2349	0.216868	0.470136
FNBP4	3.93312	0.50482	0.409001	1.23428	0.2171	0.470363
RBM24	3.77187	-0.693139	0.561907	-1.23355	0.217372	0.470673
SUMO1	3.93579	-0.67206	0.545461	-1.2321	0.217913	0.471331
SAP25	2.807	-0.746131	0.605604	-1.23204	0.217933	0.471331
SMAD3	2.89789	0.587668	0.47738	1.23103	0.218313	0.471875
TTC37	2.52378	0.593383	0.483165	1.22812	0.219403	0.47393
UACA	2.63435	0.560116	0.456195	1.2278	0.219522	0.47393
TET3	50.9987	0.336547	0.274235	1.22722	0.21974	0.474122
SAMD10	2.66022	-0.699035	0.570614	-1.22506	0.220554	0.475598
NCAPD2	2.81186	-0.610156	0.498361	-1.22432	0.22083	0.475913
KCNH3	8.80997	0.40631	0.332518	1.22192	0.221738	0.477478
MAGEA4	3.4521	0.549932	0.450259	1.22137	0.221947	0.477478
TASOR	2.6431	-0.653564	0.534958	-1.22171	0.221817	0.477478
HLA-E	3.19522	0.640928	0.525019	1.22077	0.222173	0.477685
APOO	9.22011	-0.448172	0.368175	-1.21728	0.223498	0.479129
KIR3DL1	7.03699	-0.616668	0.506223	-1.21817	0.223158	0.479129
NECAB2	3.33341	-0.597534	0.490707	-1.2177	0.223339	0.479129
PPT2	2.97982	0.557965	0.458347	1.21734	0.223474	0.479129
BAG2	2.80375	-0.795806	0.653656	-1.21747	0.223426	0.479129
TMEM50B	14.0195	0.350019	0.287778	1.21628	0.223879	0.479511
MICOS13	2.9437	0.575198	0.473097	1.21581	0.224056	0.479511
RAD51B	2.5638	0.614828	0.505706	1.21578	0.224068	0.479511
AAMP	22.9439	0.334975	0.275677	1.2151	0.224328	0.479567
SIGMAR1	9.2219	0.407522	0.335591	1.21434	0.224617	0.479567
EMX1	8.94356	0.400597	0.329822	1.21458	0.224525	0.479567
KPNA3	3.50829	-0.568976	0.468483	-1.21451	0.224554	0.479567
CCDC14	3.44654	0.573147	0.472937	1.21189	0.225555	0.481289
ZFP1	7.9319	-0.415604	0.343123	-1.21124	0.225803	0.481327
MGRN1	3.22559	0.551813	0.455737	1.21081	0.225967	0.481327
NR2F6	2.54693	0.675861	0.558186	1.21082	0.225966	0.481327
KMT2D	2.59891	0.62753	0.518587	1.21008	0.22625	0.48165
SLC25A5	3.63298	0.519702	0.429692	1.20948	0.22648	0.48186
PNRC1	3.41482	0.546935	0.454003	1.2047	0.228321	0.484653
MED24	3.30613	-0.734954	0.609951	-1.20494	0.228227	0.484653
DOCK10	2.52989	-0.690753	0.573033	-1.20543	0.228037	0.484653
TDG	3.11093	-0.717024	0.594875	-1.20534	0.228073	0.484653
TADA2B	2.58938	0.611153	0.507561	1.2041	0.228552	0.484863
PPP2R3B	2.66016	-0.660131	0.548891	-1.20266	0.229107	0.485759
SLC2A5	3.01924	-0.582117	0.485	-1.20024	0.230046	0.487468
ZDHHC5	3.44104	0.560071	0.467474	1.19808	0.230886	0.488966
C8orf58	5.64994	0.482831	0.403326	1.19712	0.231259	0.489007
EGLN2	2.86311	0.562307	0.469762	1.197	0.231305	0.489007
MLH3	2.55553	-0.641587	0.53592	-1.19717	0.23124	0.489007
CFH	3.58705	0.509764	0.426587	1.19498	0.232094	0.490392
NHLH2	31.4276	0.310455	0.259985	1.19412	0.232429	0.490818
IGHG4	7.28478	-0.431996	0.362015	-1.19331	0.232747	0.490844
PITX2	3.33266	0.52157	0.437418	1.19238	0.233111	0.490844
BRD2	3.36284	0.53937	0.451859	1.19367	0.232608	0.490844
ZEB1	3.41722	-0.541727	0.454204	-1.1927	0.232988	0.490844
NRG1	2.97731	-0.617215	0.517605	-1.19244	0.233087	0.490844
TGFB3	3.14254	0.535107	0.449292	1.191	0.233653	0.491704
FKBP9	4.42004	0.475508	0.400549	1.18714	0.235172	0.493207
RNF24	4.18167	0.504025	0.424572	1.18714	0.235174	0.493207
RNH1	2.61106	0.589646	0.496032	1.18873	0.234548	0.493207
XBP1	2.73304	0.562138	0.473488	1.18723	0.235138	0.493207
AP2B1	2.91953	0.570862	0.480872	1.18714	0.235172	0.493207
FAF2	2.67979	0.593306	0.499521	1.18775	0.234932	0.493207
TBC1D2B	2.59441	0.614611	0.518818	1.18464	0.236161	0.494993
HLA-DRB1	5.46147	-0.479246	0.404921	-1.18355	0.23659	0.495326
LPAR4	2.51212	-0.731326	0.617828	-1.18371	0.23653	0.495326
MON1B	2.88024	0.620777	0.525454	1.18141	0.237439	0.496821
B4GALT2	3.75664	-0.594075	0.503117	-1.18079	0.237687	0.497056
MAPKBP1	8.76991	0.395739	0.335458	1.1797	0.238121	0.49768
VPS13B	3.05539	-0.658735	0.558942	-1.17854	0.238582	0.498358
RPAIN	3.02757	0.542749	0.460663	1.17819	0.238721	0.498365
RSL1D1	2.75512	0.57942	0.492507	1.17647	0.239407	0.498946
TAS2R19	2.85631	0.544746	0.46278	1.17712	0.239149	0.498946
R3HDM2	2.54189	-0.721083	0.612834	-1.17664	0.239341	0.498946
IRAK1	2.84112	-0.673751	0.572967	-1.1759	0.239636	0.499139
SYTL5	3.89227	0.503008	0.428324	1.17436	0.240249	0.49985
SGPL1	2.90518	0.519261	0.442103	1.17453	0.240185	0.49985
PFDN5	6.20773	-0.467648	0.399608	-1.17027	0.241893	0.502414
MAP1B	2.7713	0.547803	0.468019	1.17047	0.241811	0.502414
TRRAP	2.93139	-0.62404	0.533182	-1.17041	0.241837	0.502414
REV3L	3.27606	-0.570002	0.487225	-1.1699	0.242043	0.502441
FLAD1	2.84083	0.590194	0.505797	1.16686	0.243267	0.50449
NOTCH2	2.79235	0.601258	0.515321	1.16677	0.243305	0.50449
H2AZ1	4.27547	0.478932	0.410875	1.16564	0.243761	0.504864
SINHCAF	2.73561	0.584379	0.501271	1.16579	0.243698	0.504864
PSMB7	4.55059	0.530504	0.455619	1.16436	0.244279	0.505652
MYOM3	2.78134	-0.585901	0.504486	-1.16138	0.245487	0.507699
PSG1	2.70996	0.580663	0.500105	1.16108	0.245608	0.507699
CAMK2N2	3.14823	0.580775	0.500574	1.16022	0.24596	0.507699
PBX3	2.52416	-0.644862	0.55562	-1.16062	0.245798	0.507699
CNR2	2.53027	-0.739776	0.637512	-1.16041	0.245882	0.507699
MAP1A	3.42264	0.500472	0.431887	1.1588	0.246536	0.508228
C11orf58	3.42078	0.567785	0.490074	1.15857	0.246632	0.508228
ATP13A1	2.53119	-0.629278	0.543101	-1.15867	0.246589	0.508228
SMARCB1	3.73557	0.495212	0.427989	1.15707	0.247245	0.50892
SIN3A	2.52175	-0.585287	0.505748	-1.15727	0.247162	0.50892
MPST	2.51331	0.610092	0.527715	1.1561	0.247639	0.509445
SMG6	2.6634	-0.722285	0.624963	-1.15572	0.247794	0.509477
AXIN1	3.28869	-0.544126	0.471462	-1.15412	0.24845	0.510211
MZF1	3.5388	-0.563458	0.488623	-1.15316	0.248846	0.510211
STX4	4.09795	0.485047	0.420486	1.15354	0.24869	0.510211
TAFA4	2.70108	-0.69682	0.603566	-1.15451	0.248293	0.510211
ADAMTS14	3.24927	0.51715	0.448453	1.15319	0.248834	0.510211
ZC3HAV1L	2.78387	0.601086	0.521667	1.15224	0.249223	0.510698
PKMYT1	9.42463	0.416005	0.36182	1.14976	0.250244	0.511479
GNA15	7.38198	0.435516	0.378513	1.1506	0.249898	0.511479
DUSP5	4.0089	-0.574903	0.500229	-1.14928	0.250441	0.511479
NRAS	3.04653	0.572722	0.498024	1.14999	0.250149	0.511479
SLURP1	2.79223	-0.558777	0.485499	-1.15093	0.24976	0.511479
ARHGAP11B	2.96587	0.625192	0.543938	1.14938	0.250399	0.511479
SULT1C4	11.3671	0.322396	0.280957	1.14749	0.251178	0.511561
RAB39A	5.73177	0.441734	0.38457	1.14865	0.250702	0.511561
CDRT4	3.59464	0.549362	0.478338	1.14848	0.25077	0.511561
DNAJC5	2.56117	-0.709047	0.617763	-1.14776	0.251066	0.511561
EVC2	2.60346	-0.576912	0.502681	-1.14767	0.251104	0.511561
TGFBR2	2.96017	-0.659947	0.575292	-1.14715	0.251318	0.511562
NIPBL	2.77334	-0.596461	0.520155	-1.1467	0.251506	0.511661
SYNPO2L	3.05681	-0.626702	0.547115	-1.14547	0.252016	0.51213
RHOA	2.7745	-0.70701	0.617108	-1.14568	0.251926	0.51213
DHRS2	4.12028	0.477131	0.416754	1.14487	0.252261	0.512345
RAMAC	3.2112	0.770242	0.673053	1.1444	0.252458	0.51246
OLFML3	7.45744	0.427088	0.37367	1.14296	0.253056	0.513241
MRPS16	5.50419	0.452325	0.396272	1.14145	0.253682	0.513241
LRIG1	3.98071	-0.519524	0.454988	-1.14184	0.25352	0.513241
PSENEN	2.91482	0.602651	0.527818	1.14178	0.253546	0.513241
MTG1	2.67673	0.58325	0.510613	1.14225	0.253349	0.513241
CAST	2.5735	-0.653912	0.572412	-1.14238	0.253296	0.513241
UBE2T	2.50826	-0.628135	0.550641	-1.14074	0.25398	0.51356
ZC3H18	2.64111	-0.656803	0.576013	-1.14026	0.254179	0.51368
PPP3R1	3.03163	-0.578593	0.50807	-1.13881	0.254784	0.514619
MTA3	2.61792	0.555865	0.488462	1.13799	0.255125	0.515023
HOXD3	2.69607	0.537547	0.472765	1.13703	0.255527	0.515551
NKX2-5	2.94691	-0.605092	0.532579	-1.13615	0.255892	0.516005
ATP5MJ	3.70337	-0.50902	0.448452	-1.13506	0.25635	0.516645
SRP68	2.78623	0.550675	0.485341	1.13461	0.256537	0.516737
PCBP4	3.98422	0.522229	0.460657	1.13366	0.256937	0.517258
ADD3	3.22613	0.58902	0.520303	1.13207	0.257605	0.518034
ABI2	2.54263	-0.724126	0.639467	-1.13239	0.25747	0.518034
IRAK3	3.249	-0.721231	0.637719	-1.13095	0.258074	0.518694
ART1	9.5013	0.353398	0.312822	1.12971	0.258599	0.518895
SLC27A4	2.5964	0.588516	0.520801	1.13002	0.258467	0.518895
ARL15	2.52787	-0.590528	0.522521	-1.13015	0.258412	0.518895
TSC22D3	3.73458	0.534595	0.473746	1.12844	0.259133	0.519683
ARHGEF17	2.55055	0.559254	0.496224	1.12702	0.259734	0.520603
ZNF567	2.91388	0.530203	0.470652	1.12653	0.259942	0.520737
GLIS2	5.62098	0.433892	0.385349	1.12597	0.260178	0.520923
WBP1	3.26643	0.510737	0.454383	1.12402	0.261004	0.522293
SPDYE5	2.88513	-0.628251	0.559223	-1.12344	0.261252	0.522504
IRF2BP2	2.95201	0.545048	0.485577	1.12248	0.26166	0.522751
AURKB	2.55246	-0.651637	0.580479	-1.12259	0.261613	0.522751
OLA1	3.14801	0.517517	0.461365	1.12171	0.261987	0.523118
LTBP3	2.88242	0.5307	0.473666	1.12041	0.262539	0.523935
USP9X	3.28045	0.528625	0.472491	1.1188	0.263224	0.524897
USP46	2.66499	-0.641319	0.573319	-1.11861	0.263307	0.524897
C1QBP	2.8334	0.559059	0.500924	1.11606	0.264398	0.526785
RSRC2	2.72887	-0.622661	0.559154	-1.11358	0.26546	0.527469
RBM15B	2.93868	0.511211	0.458895	1.114	0.265277	0.527469
CDC34	2.70088	0.569815	0.511414	1.11419	0.265196	0.527469
TNFRSF13C	3.03135	-0.689005	0.618691	-1.11365	0.26543	0.527469
TMEM175	2.79117	-0.598069	0.536651	-1.11445	0.265088	0.527469
TCHP	2.65303	-0.667202	0.601306	-1.10959	0.267177	0.530592
TGIF1	3.12728	-0.617515	0.557299	-1.10805	0.26784	0.531623
SLC26A6	2.67341	-0.59421	0.536591	-1.10738	0.268129	0.531908
RTCA	2.59205	-0.579793	0.523776	-1.10695	0.268316	0.531992
METTL17	3.27458	0.557748	0.504834	1.10481	0.26924	0.533535
RAPGEFL1	2.90798	-0.568182	0.514764	-1.10377	0.269691	0.53414
ELP6	2.87836	0.769239	0.697167	1.10338	0.269863	0.534191
HEXA	2.71648	0.526793	0.477628	1.10294	0.270055	0.534235
SLC39A13	2.91368	-0.548251	0.497209	-1.10266	0.270176	0.534235
TRIM15	2.68597	-0.564338	0.512024	-1.10217	0.270387	0.534365
MLIP	5.24794	0.432806	0.393061	1.10112	0.270845	0.534982
AKAP13	3.29572	-0.531323	0.483103	-1.09981	0.271414	0.535681
EML2	3.36552	-0.511747	0.465379	-1.09963	0.271492	0.535681
MKRN1	2.64572	0.53591	0.487599	1.09908	0.271733	0.53587
FAM3A	5.60305	0.455286	0.415192	1.09657	0.27283	0.536745
RER1	2.94961	0.506843	0.462284	1.09639	0.272909	0.536745
GLYR1	2.65388	0.534698	0.487623	1.09654	0.272842	0.536745
RAPH1	2.60739	0.585771	0.533837	1.09728	0.272517	0.536745
CTAG2	2.53161	-0.6739	0.614516	-1.09664	0.272801	0.536745
SUGP2	3.18286	0.502093	0.459186	1.09344	0.274201	0.538834
NUDT4B	2.82125	0.50509	0.462067	1.09311	0.274346	0.538834
DHPS	2.54861	0.546253	0.499792	1.09296	0.274411	0.538834
CUL9	2.57238	0.645959	0.591408	1.09224	0.274728	0.539166
ZFAND6	2.63064	-0.585312	0.536683	-1.09061	0.275444	0.540282
UPF2	2.98013	-0.629578	0.577534	-1.09012	0.275662	0.540422
MAZ	13.6407	0.353008	0.324197	1.08887	0.276212	0.54088
SLC34A2	2.74318	-0.602883	0.553994	-1.08825	0.276486	0.54088
PDCD6IP	2.6304	0.554332	0.509252	1.08852	0.276365	0.54088
PLEKHH3	2.96633	-0.537825	0.494198	-1.08828	0.276472	0.54088
GARS1	2.72359	0.51268	0.471392	1.08759	0.276777	0.541162
ACAD9	3.22647	-0.572922	0.527029	-1.08708	0.277002	0.541312
RBM25	2.53329	0.521692	0.480389	1.08598	0.277489	0.541373
ZFP36	2.86966	-0.587251	0.540576	-1.08634	0.277327	0.541373
PRMT5	2.56788	-0.567157	0.522331	-1.08582	0.277559	0.541373
BTBD2	2.69762	-0.599772	0.552442	-1.08567	0.277623	0.541373
SOX9	7.30334	-0.440103	0.405772	-1.08461	0.278095	0.542005
OBSL1	4.23742	-0.461216	0.425953	-1.08279	0.278904	0.542831
SLF2	4.18278	0.445804	0.41177	1.08265	0.278963	0.542831
ING4	3.73788	0.456876	0.421865	1.08299	0.278813	0.542831
CARD9	8.77413	0.419294	0.387547	1.08192	0.27929	0.543179
UBAP2L	3.55642	0.466284	0.431641	1.08026	0.280028	0.543912
ALDH18A1	2.68657	-0.629181	0.582539	-1.08007	0.280112	0.543912
LIX1L	2.62913	-0.647034	0.598704	-1.08072	0.27982	0.543912
SDF4	2.79446	0.505039	0.467747	1.07973	0.280264	0.543919
ZNF684	7.62216	0.388311	0.360082	1.0784	0.280857	0.544782
TFPI	2.84071	0.548583	0.508883	1.07801	0.281027	0.544824
PRMT8	366.864	0.290602	0.269727	1.07739	0.281305	0.545074
PRPS1	2.5072	-0.579127	0.537851	-1.07674	0.281596	0.54535
VPS4A	2.97099	-0.716166	0.665721	-1.07578	0.282028	0.545899
WDR45B	2.55051	0.559856	0.520843	1.0749	0.282418	0.546365
RIF1	2.62203	0.508743	0.473601	1.0742	0.282731	0.546684
DYRK2	3.19542	-0.498317	0.465126	-1.07136	0.284009	0.548575
SPIN1	3.05506	0.499551	0.466226	1.07148	0.283955	0.548575
MYOD1	3.81567	0.452636	0.423026	1.07	0.284621	0.549054
H1-7	3.68456	-0.497123	0.464684	-1.06981	0.284706	0.549054
LCAT	2.52811	0.550785	0.514581	1.07036	0.284459	0.549054
PCMT1	2.53492	-0.611264	0.571639	-1.06932	0.284926	0.54919
KMT5B	2.56797	-0.568701	0.532029	-1.06893	0.285102	0.549241
CUL4B	2.86896	-0.576961	0.539996	-1.06845	0.285316	0.549364
FSTL1	11.1705	0.380271	0.35639	1.06701	0.285969	0.550334
GPI	2.90164	0.524177	0.491515	1.06645	0.28622	0.550525
CCNG1	2.8242	-0.625708	0.587084	-1.06579	0.286519	0.550525
NFATC4	2.82649	0.51525	0.483316	1.06607	0.286391	0.550525
TLCD3B	3.22899	0.508642	0.477803	1.06454	0.287083	0.55103
RPRD1A	2.5566	-0.536406	0.50381	-1.0647	0.287012	0.55103
RHOT2	2.55795	0.498271	0.468549	1.06344	0.287585	0.551705
FGFR1OP2	3.89843	0.476821	0.448824	1.06238	0.288064	0.552047
NASP	4.51491	0.472969	0.445132	1.06254	0.287992	0.552047
MYLPF	11.7963	-0.341026	0.321986	-1.05913	0.28954	0.552749
GLUD1	2.58446	-0.619107	0.584767	-1.05872	0.289726	0.552749
APMAP	2.71399	0.488232	0.460655	1.05986	0.289206	0.552749
NAA15	3.35322	0.451598	0.426703	1.05834	0.289899	0.552749
TNFAIP2	2.71806	0.502764	0.474091	1.06048	0.288926	0.552749
SMIM13	3.02662	0.542473	0.512254	1.05899	0.289603	0.552749
TMUB2	3.07564	0.535891	0.505692	1.05972	0.289272	0.552749
COQ7	2.6675	-0.544222	0.514501	-1.05777	0.290162	0.552749
NOL12	2.81546	-0.557716	0.527321	-1.05764	0.290219	0.552749
C5orf15	2.55538	0.535298	0.504796	1.06042	0.288952	0.552749
SLC35B2	3.00871	0.500982	0.473698	1.0576	0.290239	0.552749
ANKRD13B	2.68932	-0.557606	0.526869	-1.05834	0.289901	0.552749
XPOT	2.65798	0.525059	0.49692	1.05663	0.290682	0.553172
U2AF1L4	3.09971	0.506604	0.479534	1.05645	0.290762	0.553172
ANKRD16	2.5361	0.561529	0.531897	1.05571	0.291101	0.553243
SYNGR3	2.50669	-0.713677	0.675891	-1.05591	0.291012	0.553243
TCEAL7	3.44036	-0.505013	0.478765	-1.05482	0.291506	0.553725
CDK9	2.73853	0.531553	0.504176	1.0543	0.291746	0.553894
TTC3	4.26395	0.43605	0.413984	1.0533	0.292203	0.554475
MRPL33	3.26807	0.453078	0.431296	1.0505	0.293486	0.555779
KRT12	3.67619	0.459859	0.437897	1.05015	0.293648	0.555779
THBS1	2.81762	0.500538	0.476467	1.05052	0.293479	0.555779
NUP98	2.89049	0.497206	0.473245	1.05063	0.293428	0.555779
PNRC2	3.00489	0.520138	0.495169	1.05043	0.293523	0.555779
TIPIN	4.7937	0.422222	0.402437	1.04916	0.294103	0.556102
IZUMO2	2.70047	0.516353	0.492176	1.04912	0.294122	0.556102
SMC4	3.35327	0.486383	0.463954	1.04834	0.294481	0.556438
CPS1	2.52686	0.550479	0.525228	1.04808	0.294603	0.556438
PLEKHG5	2.95362	0.513709	0.490313	1.04772	0.29477	0.556467
ARF5	4.51706	0.389142	0.371792	1.04667	0.295254	0.557021
TRAPPC9	2.67803	-0.559149	0.534344	-1.04642	0.295367	0.557021
SIL1	2.52277	-0.562489	0.537768	-1.04597	0.295575	0.557126
ZNF146	3.92985	0.486253	0.46552	1.04454	0.296237	0.557998
GLRX3	2.52904	0.547164	0.523948	1.04431	0.296342	0.557998
SLC2A1	2.67093	0.528819	0.506624	1.04381	0.296574	0.558149
ZDHHC18	2.75196	-0.515074	0.494699	-1.04119	0.29779	0.56015
PGLS	3.10019	0.574841	0.552961	1.03957	0.29854	0.560987
NAGLU	2.58774	-0.587044	0.564644	-1.03967	0.298493	0.560987
DZIP1L	5.26177	-0.396879	0.382908	-1.03648	0.299976	0.562532
LUC7L2	3.43826	0.45715	0.441045	1.03652	0.299962	0.562532
NF2	2.71014	-0.574869	0.554536	-1.03667	0.299891	0.562532
ABR	3.16799	0.458435	0.442241	1.03662	0.299913	0.562532
XKR4	4.44026	-0.45241	0.436834	-1.03566	0.300362	0.562707
TBC1D3C	3.78976	0.482834	0.466224	1.03563	0.300376	0.562707
SNRNP200	3.45545	-0.521529	0.504498	-1.03376	0.301249	0.564054
MARK4	3.44235	-0.61016	0.590847	-1.03269	0.30175	0.564704
TASOR2	13.8773	0.315871	0.30607	1.03202	0.302061	0.564997
STAG2	3.04374	-0.509074	0.493794	-1.03094	0.302568	0.565657
CNPPD1	2.53679	0.524361	0.508798	1.03059	0.302734	0.565679
HTT	2.77998	0.479291	0.465378	1.0299	0.303058	0.565996
GPR141	3.42393	0.489014	0.47502	1.02946	0.303264	0.566092
TTC1	2.61707	0.558307	0.54294	1.0283	0.303807	0.5667
C1QL4	2.71574	-0.547288	0.532454	-1.02786	0.304016	0.5667
ATG9A	3.51139	-0.531663	0.517472	-1.02742	0.304221	0.5667
RABL6	3.39333	0.535866	0.521715	1.02712	0.304362	0.5667
ANKRD62	3.77545	0.448377	0.436398	1.02745	0.304209	0.5667
BRWD1	2.99171	-0.564917	0.55121	-1.02487	0.305426	0.568394
MAVS	3.841	0.432895	0.424389	1.02004	0.307707	0.571739
PTPA	2.82907	0.529588	0.519332	1.01975	0.307847	0.571739
MC3R	2.74992	-0.505442	0.495332	-1.02041	0.307534	0.571739
CBY1	2.87207	-0.500764	0.490932	-1.02003	0.307715	0.571739
FIZ1	9.79048	0.364266	0.357508	1.0189	0.308249	0.572194
FAM3C	11.5424	0.298552	0.293544	1.01706	0.309125	0.572973
TDGF1	5.50935	0.372216	0.365747	1.01769	0.308827	0.572973
SHC1	4.28254	0.490428	0.482305	1.01684	0.309229	0.572973
HOXC10	2.80523	-0.525485	0.51685	-1.01671	0.309293	0.572973
UQCR11	3.23522	0.477347	0.469951	1.01574	0.309754	0.573538
ERI3	2.65814	0.491061	0.483785	1.01504	0.310087	0.573864
NCBP2	5.9844	0.354162	0.349482	1.01339	0.310874	0.574489
SLC36A4	4.72169	0.423031	0.417594	1.01302	0.311051	0.574489
SPN	2.7259	0.484906	0.478638	1.0131	0.311015	0.574489
ZEB2	3.34976	-0.506459	0.499793	-1.01334	0.3109	0.574489
TESC	12.0741	0.301948	0.299485	1.00823	0.313346	0.576308
STX5	4.71839	-0.487814	0.483583	-1.00875	0.313095	0.576308
POLR2J	5.94987	0.397084	0.393217	1.00983	0.312575	0.576308
MKNK2	3.97746	0.41082	0.406928	1.00957	0.312703	0.576308
RPN2	3.96518	0.432403	0.428967	1.00801	0.31345	0.576308
CCDC97	3.79767	-0.569111	0.564512	-1.00815	0.313384	0.576308
C14orf180	3.61517	0.458976	0.454758	1.00928	0.312843	0.576308
PAM	2.54604	0.496262	0.491443	1.0098	0.312589	0.576308
MRPL4	3.84029	-0.592368	0.586445	-1.0101	0.312448	0.576308
C5orf51	3.44226	0.433185	0.430075	1.00723	0.313824	0.576417
NR2F1	2.51435	-0.609992	0.605568	-1.00731	0.313788	0.576417
TAF10	3.24353	0.463431	0.460408	1.00657	0.314143	0.576577
DENND2A	2.78652	0.455089	0.452197	1.0064	0.314225	0.576577
[truncated: 9,412 more rows]

## Sheet: MYOG_D1_vs_D5
Gene	baseMean	log2FoldChange	lfcSE	stat	pvalue	padj
MTRNR2L10	300.421	-3.0871	0.19447	-15.8744	9.53111e-57	1.0876e-52
FN1	32.9252	3.35773	0.220291	15.2423	1.85347e-52	1.0575e-48
FBXO15	44.741	2.69555	0.190158	14.1753	1.30226e-45	4.95338e-42
MYBPC1	8.24552	-3.30897	0.278537	-11.8798	1.5074e-32	4.30023e-29
MYH1	21.1762	-3.13799	0.2694	-11.6481	2.3476e-31	5.3577e-28
TNNT3	25.5614	-2.00617	0.172784	-11.6109	3.62837e-31	6.44897e-28
S100A6	14.4254	3.0131	0.259672	11.6035	3.95607e-31	6.44897e-28
CALR	12.763	2.07978	0.184485	11.2734	1.77487e-29	2.53163e-26
OLFML2B	11.4317	2.488	0.220948	11.2606	2.05386e-29	2.60406e-26
PXDN	7.36685	2.50935	0.22319	11.2431	2.50478e-29	2.8582e-26
SPARC	40.1722	1.82979	0.164136	11.148	7.32304e-29	7.59666e-26
BGN	8.78553	2.62297	0.235535	11.1363	8.35508e-29	7.94499e-26
OLFML2A	10.7847	2.58423	0.233152	11.0839	1.5016e-28	1.31806e-25
PFN1	20.5344	2.36856	0.214765	11.0286	2.78145e-28	2.26708e-25
ADGRG1	6.56513	2.79162	0.254964	10.9491	6.71208e-28	5.1061e-25
TGFBI	8.81288	2.95668	0.270319	10.9377	7.60806e-28	5.42597e-25
GCNT2	7.31386	-3.39636	0.310997	-10.9209	9.16156e-28	6.14956e-25
CD63	24.7522	1.7893	0.169648	10.5471	5.23794e-26	3.32056e-23
MYH8	18.1247	-2.4406	0.231807	-10.5286	6.37903e-26	3.83111e-23
PTMA	15.1504	2.14646	0.207368	10.351	4.14263e-25	2.36358e-22
GPC1	36.4619	1.76924	0.173075	10.2224	1.57448e-24	8.16654e-22
FKBP10	8.2386	2.14881	0.210169	10.2242	1.54463e-24	8.16654e-22
CD82	6.41997	2.27567	0.225449	10.0939	5.87645e-24	2.91549e-21
PPIA	15.9532	1.93288	0.195412	9.89132	4.54001e-23	2.15858e-20
TIMP1	7.13893	2.52861	0.258023	9.7999	1.12694e-22	5.14378e-20
CDKN1C	11.9983	2.19111	0.224494	9.76025	1.66742e-22	7.31807e-20
RPL19	19.561	1.86163	0.191302	9.73133	2.21682e-22	9.36896e-20
SERPINF1	12.5236	2.04475	0.210688	9.70511	2.86754e-22	1.16862e-19
MYL1	38.9704	-2.23891	0.232388	-9.63437	5.72433e-22	2.25243e-19
CCDC102A	10.8817	-2.79879	0.292107	-9.58139	9.57474e-22	3.64191e-19
RPL27A	16.5641	2.07612	0.221778	9.36129	7.87711e-21	2.89954e-18
RPS2	16.4216	2.29025	0.245769	9.31871	1.17767e-20	4.19949e-18
MEGF10	8.39677	2.03042	0.220846	9.19384	3.79059e-20	1.31074e-17
TMSB4X	26.7251	2.29197	0.249399	9.18998	3.92905e-20	1.31866e-17
MYH9	13.667	1.83488	0.200785	9.13855	6.32957e-20	2.06362e-17
MARCKSL1	10.3936	1.85838	0.203691	9.12352	7.27203e-20	2.30503e-17
DLK1	7.48395	-3.18007	0.349291	-9.10437	8.67721e-20	2.6761e-17
ITM2C	7.35539	2.19428	0.242591	9.04515	1.49459e-19	4.48809e-17
RPS28	14.76	2.14194	0.238526	8.97989	2.7104e-19	7.93036e-17
PTMS	11.7135	1.99279	0.222557	8.95404	3.42719e-19	9.77691e-17
RPL37A	26.3873	2.11288	0.236683	8.92704	4.37559e-19	1.19491e-16
EFHD2	10.916	2.60372	0.291685	8.92647	4.39805e-19	1.19491e-16
MAGED1	12.4208	1.54465	0.17366	8.8947	5.85783e-19	1.5545e-16
ACTA1	129.796	-2.25238	0.253344	-8.89059	6.07875e-19	1.57647e-16
LAMA5	5.69732	2.35933	0.26633	8.85866	8.09808e-19	2.05349e-16
MYH4	7.08311	-3.22963	0.366673	-8.80793	1.27472e-18	3.16215e-16
RPS3	14.5869	2.12567	0.244461	8.69535	3.4576e-18	8.39461e-16
DBN1	17.0726	1.6974	0.196475	8.63923	5.65956e-18	1.34544e-15
COL1A1	59.4707	2.67308	0.309913	8.62525	6.39528e-18	1.48932e-15
COL6A3	7.51287	1.94076	0.225123	8.62086	6.64547e-18	1.51663e-15
RPS12	20.8761	2.0188	0.234357	8.6142	7.04344e-18	1.57594e-15
HNRNPL	10.8546	1.46252	0.170718	8.5669	1.06312e-17	2.28892e-15
PGD	7.65802	1.931	0.225383	8.5676	1.05663e-17	2.28892e-15
RPS3A	21.7319	1.8075	0.211424	8.54916	1.23993e-17	2.62015e-15
LGALS1	13.1121	2.1482	0.251467	8.54264	1.3119e-17	2.72184e-15
RPS8	21.2629	1.72106	0.202741	8.48896	2.08494e-17	4.24843e-15
COL4A2	6.20638	1.90794	0.225165	8.4735	2.3813e-17	4.76719e-15
SEMA6B	7.7137	2.01465	0.238144	8.45981	2.6782e-17	5.26913e-15
CASQ2	12.3593	-2.27716	0.270585	-8.41569	3.90585e-17	7.55419e-15
RPL12	9.15065	2.20466	0.262148	8.41	4.10018e-17	7.79786e-15
TUBB2B	7.84682	1.98759	0.236932	8.38885	4.90926e-17	9.18354e-15
BSG	5.02759	2.51539	0.300213	8.37869	5.35222e-17	9.85067e-15
TNNI2	30.0447	-1.73259	0.207216	-8.36127	6.20457e-17	1.12382e-14
ANXA2	9.69834	1.81578	0.217342	8.35448	6.57243e-17	1.17184e-14
JOSD2	14.0597	1.76026	0.212138	8.2977	1.06145e-16	1.86342e-14
IGF2	145.113	1.81813	0.219321	8.28984	1.13397e-16	1.96057e-14
TPM4	6.65882	1.98117	0.239267	8.28016	1.23013e-16	2.09508e-14
RPL31	11.3551	1.96052	0.236846	8.2776	1.25685e-16	2.10911e-14
RPL9	15.3378	1.87056	0.226819	8.24696	1.62481e-16	2.68705e-14
RPLP2	13.0836	1.85686	0.226761	8.18862	2.64239e-16	4.30748e-14
RASSF4	13.8381	1.86308	0.228946	8.13765	4.03039e-16	6.47757e-14
LDB3	10.9387	-1.44381	0.178899	-8.07057	6.9969e-16	1.10891e-13
PYGM	5.43515	-2.24252	0.278415	-8.0546	7.97384e-16	1.24643e-13
EIF3C	11.3657	1.5681	0.195304	8.02901	9.82608e-16	1.51521e-13
SUN2	6.23985	1.90318	0.238156	7.99134	1.33478e-15	2.03082e-13
RPL7	18.1952	1.64677	0.206498	7.97476	1.52682e-15	2.29245e-13
RPL28	10.0094	2.21149	0.277773	7.9615	1.69961e-15	2.51874e-13
ITGB1	8.15015	1.60575	0.201923	7.9523	1.83087e-15	2.67847e-13
RPL39	6.08947	1.87303	0.235661	7.94799	1.89569e-15	2.73819e-13
MYH7B	9.26632	-2.28221	0.287224	-7.94574	1.93035e-15	2.7534e-13
RPL6	20.5379	1.5535	0.198521	7.82535	5.06266e-15	7.1321e-13
TNC	11.6749	1.77578	0.227273	7.81344	5.56465e-15	7.74368e-13
RPS24	17.3139	1.82688	0.233942	7.80913	5.75839e-15	7.91674e-13
CACNA1I	3.38041	-2.39883	0.308547	-7.77462	7.56754e-15	1.02801e-12
RPS11	11.8045	1.78754	0.230002	7.77182	7.73646e-15	1.0386e-12
HGF	20.3446	1.73033	0.22317	7.75344	8.94379e-15	1.17308e-12
PDE4DIP	11.9044	-1.57992	0.203763	-7.75373	8.92316e-15	1.17308e-12
ITM2A	4.33465	-2.63674	0.341526	-7.72047	1.159e-14	1.50288e-12
RPL41	25.2512	1.87604	0.24352	7.70383	1.32047e-14	1.69303e-12
RPL10A	14.4121	1.70543	0.221932	7.68446	1.53641e-14	1.94799e-12
EEF1B2	5.01271	2.33597	0.305555	7.64502	2.08912e-14	2.61967e-12
RPL18A	7.58587	1.78109	0.235523	7.56227	3.96087e-14	4.91277e-12
CALM1	5.36151	1.9775	0.261706	7.55617	4.15116e-14	5.09343e-12
ENO1	6.33906	1.63257	0.216146	7.5531	4.25018e-14	5.15945e-12
PLD3	14.6613	1.38856	0.184017	7.54586	4.49327e-14	5.39713e-12
MYOZ1	4.47761	-2.22043	0.296432	-7.49055	6.85864e-14	8.15249e-12
SLN	7.61225	-2.11082	0.282456	-7.47307	7.83475e-14	9.21674e-12
RPL26	12.0161	1.695	0.226906	7.47008	8.01486e-14	9.3324e-12
PLS3	6.39404	1.74916	0.234558	7.45725	8.83487e-14	1.01833e-11
FHL1	13.3982	-2.05168	0.275723	-7.44107	9.98708e-14	1.13963e-11
MDK	7.32511	1.77941	0.23937	7.43373	1.05576e-13	1.1928e-11
CAV1	5.48015	1.90256	0.256095	7.42913	1.09316e-13	1.22295e-11
MUSTN1	5.6391	-1.93485	0.261284	-7.40515	1.30999e-13	1.43733e-11
RPS10	6.55888	1.90935	0.257812	7.40596	1.3021e-13	1.43733e-11
CTSB	5.7764	1.67852	0.226814	7.40039	1.35782e-13	1.47562e-11
TAGLN2	7.24377	1.89345	0.256047	7.39492	1.41497e-13	1.52323e-11
MAGEA4	5.43865	1.98451	0.269258	7.37029	1.70261e-13	1.79893e-11
CD59	5.17721	1.78157	0.241716	7.37054	1.69944e-13	1.79893e-11
CLIC4	6.25382	1.8215	0.247345	7.36421	1.78193e-13	1.86547e-11
COL6A1	16.9419	1.6192	0.220014	7.35953	1.84564e-13	1.9146e-11
RACK1	12.3608	1.72976	0.235632	7.34095	2.12078e-13	2.1802e-11
FLNA	7.27005	1.50965	0.205914	7.33146	2.27651e-13	2.29887e-11
HMGA1	4.13283	2.31475	0.315692	7.33232	2.26201e-13	2.29887e-11
CRYAB	9.25354	-1.86443	0.25494	-7.31323	2.60804e-13	2.58786e-11
CFL1	9.03817	1.52482	0.208501	7.31327	2.60724e-13	2.58786e-11
RPL36A	7.92879	1.90931	0.261668	7.29668	2.94957e-13	2.90152e-11
BCAM	4.89186	1.88091	0.257878	7.29377	3.01393e-13	2.93948e-11
ATP2A1	14.0149	-1.39236	0.191303	-7.2783	3.38044e-13	3.269e-11
PDLIM4	9.46359	1.54046	0.211712	7.27618	3.43398e-13	3.29287e-11
SRL	17.662	-1.71483	0.235794	-7.27259	3.52664e-13	3.35354e-11
ZFP36L1	10.1159	1.14946	0.158392	7.25704	3.95645e-13	3.73116e-11
FTH1	20.0345	1.55102	0.213964	7.24899	4.19904e-13	3.92748e-11
GNB2	5.28166	1.7343	0.239494	7.24151	4.43726e-13	4.11655e-11
RPL17	20.346	1.53378	0.21186	7.23958	4.50061e-13	4.14165e-11
EMC10	5.93189	1.58018	0.218493	7.23221	4.75206e-13	4.33806e-11
RCN1	12.7712	1.35356	0.187562	7.21657	5.33159e-13	4.82847e-11
HNRNPA1	25.4504	1.53011	0.212858	7.1884	6.55528e-13	5.88995e-11
RPL29	14.4254	1.76045	0.244946	7.1871	6.61813e-13	5.89996e-11
LMNA	16.3088	1.43666	0.200213	7.17565	7.1967e-13	6.36601e-11
ANXA5	6.85465	1.50274	0.20991	7.15897	8.1288e-13	7.13521e-11
SLC25A19	7.41482	1.56967	0.219893	7.13834	9.44624e-13	8.22833e-11
LAMC1	8.12455	1.42711	0.200403	7.12124	1.06962e-12	9.24656e-11
USP18	4.90209	1.82617	0.256932	7.10759	1.18087e-12	1.01315e-10
STMN1	11.7417	1.6623	0.23486	7.07783	1.46424e-12	1.2469e-10
RPS27A	11.294	1.45987	0.207506	7.03532	1.98804e-12	1.68041e-10
GAL3ST2	21.1221	-1.39962	0.199897	-7.00169	2.52897e-12	2.12192e-10
SOX8	8.24029	1.7203	0.246104	6.99012	2.74641e-12	2.28754e-10
RPS20	12.3411	1.50634	0.215752	6.98183	2.91352e-12	2.40914e-10
RPL8	9.20766	1.64773	0.236043	6.9806	2.9392e-12	2.41289e-10
RPS17	16.0255	1.59854	0.229537	6.96422	3.30233e-12	2.68517e-10
VKORC1	4.28832	1.9103	0.274329	6.96355	3.31793e-12	2.68517e-10
RPS5	9.99477	1.87196	0.269714	6.94055	3.90589e-12	3.12941e-10
VASP	4.72557	1.72657	0.248787	6.93997	3.92171e-12	3.12941e-10
NAP1L1	11.3991	1.43371	0.207318	6.91552	4.6615e-12	3.69391e-10
ACTN2	24.5441	-1.28712	0.187083	-6.87996	5.98707e-12	4.69093e-10
RPL7A	25.2354	1.55101	0.22545	6.8796	6.0019e-12	4.69093e-10
TCF12	8.13358	1.54343	0.224598	6.87197	6.33196e-12	4.91524e-10
RPS15A	6.59358	1.75323	0.256791	6.82747	8.64249e-12	6.66348e-10
RUNX1	5.10607	1.46324	0.215467	6.79102	1.11343e-11	8.52711e-10
DKK1	10.1539	1.6225	0.23919	6.7833	1.17463e-11	8.93578e-10
S100A11	4.69857	1.88213	0.278269	6.76371	1.34501e-11	1.01642e-09
CORO1C	6.84039	1.42733	0.2111	6.7614	1.36665e-11	1.02598e-09
TGFB1	3.30282	2.16445	0.321783	6.72643	1.73881e-11	1.29684e-09
CACNA1S	7.38682	-1.46339	0.217638	-6.72395	1.76863e-11	1.31051e-09
EIF4B	6.78143	1.66571	0.248098	6.71394	1.89444e-11	1.39468e-09
P4HB	7.76612	1.39886	0.208654	6.70424	2.02463e-11	1.48097e-09
RPL13A	8.25962	1.67507	0.250341	6.69116	2.21411e-11	1.60925e-09
SLC12A7	4.72793	1.74288	0.261102	6.6751	2.47067e-11	1.78435e-09
ACHE	6.64319	-1.80004	0.269942	-6.66824	2.58888e-11	1.85797e-09
RPL36	7.7493	1.69512	0.255364	6.63805	3.17849e-11	2.26686e-09
VIM	49.7608	1.42554	0.215183	6.62478	3.47759e-11	2.46477e-09
RPLP1	11.5083	1.50731	0.227904	6.61379	3.74607e-11	2.63867e-09
RPS23	13.7741	1.72124	0.260635	6.60402	4.00154e-11	2.80133e-09
CCND2	7.56043	1.40135	0.212312	6.60044	4.09929e-11	2.85226e-09
COL5A1	10.4819	1.52143	0.231671	6.56719	5.1275e-11	3.48286e-09
RPL13	12.2775	1.47565	0.2247	6.56718	5.12769e-11	3.48286e-09
HNRNPC	9.54515	1.3957	0.212489	6.56833	5.0882e-11	3.48286e-09
RPL22	10.5169	1.85525	0.28246	6.56817	5.09377e-11	3.48286e-09
H4C12	3.89201	1.79899	0.274478	6.55421	5.59359e-11	3.77683e-09
HNRNPA2B1	25.4333	0.994805	0.151888	6.54958	5.76972e-11	3.87284e-09
SIRT2	5.78107	1.55477	0.237774	6.53887	6.19873e-11	4.13648e-09
TLE5	11.7172	1.32353	0.204517	6.47149	9.70383e-11	6.43782e-09
EMP3	5.29896	1.53228	0.236845	6.46955	9.82964e-11	6.48358e-09
CAV3	8.34683	-1.33953	0.207102	-6.46797	9.9329e-11	6.51404e-09
RPL37	16.0558	1.71857	0.266316	6.45315	1.0955e-10	7.14327e-09
CKAP4	4.47618	1.6352	0.253743	6.44432	1.16119e-10	7.52857e-09
DCLK3	9.44016	-2.06834	0.321555	-6.43231	1.25676e-10	8.10218e-09
PCOLCE	4.78559	1.69064	0.263269	6.42174	1.34725e-10	8.63676e-09
PLOD1	6.25843	1.43802	0.224669	6.40061	1.54754e-10	9.86536e-09
MYH2	4.41415	-1.99367	0.311593	-6.39832	1.57098e-10	9.95912e-09
NME2	8.34876	1.63339	0.255457	6.39399	1.6161e-10	1.01886e-08
ACTN3	9.92549	-1.29897	0.203535	-6.38204	1.74748e-10	1.09563e-08
NCL	8.81925	1.16423	0.183435	6.34685	2.19767e-10	1.37036e-08
NCOR2	7.45153	1.384	0.218151	6.34423	2.23548e-10	1.38636e-08
PPIB	5.56632	1.48769	0.234577	6.34201	2.26788e-10	1.39886e-08
DDOST	6.33768	1.22723	0.193701	6.33567	2.36318e-10	1.4498e-08
PABPC1	9.40032	1.59301	0.251831	6.32573	2.52046e-10	1.53802e-08
PRKCSH	5.09831	1.56455	0.248158	6.30466	2.88828e-10	1.75309e-08
RPS4X	15.0454	1.50412	0.239411	6.2826	3.32966e-10	2.0103e-08
ATP1B4	3.12412	-2.05129	0.327486	-6.26374	3.75847e-10	2.25726e-08
IL17B	4.43482	-2.37529	0.380152	-6.24825	4.15064e-10	2.47974e-08
RPS14	14.9859	1.77923	0.285099	6.24075	4.35476e-10	2.58814e-08
RPL32	19.4942	1.42799	0.228896	6.23858	4.41551e-10	2.61064e-08
NRAP	2.68563	-2.46896	0.396035	-6.23418	4.54155e-10	2.67132e-08
MYH7	5.08258	-1.73668	0.280051	-6.20132	5.59915e-10	3.27651e-08
NUCB1	5.70776	1.40254	0.22677	6.18487	6.21524e-10	3.61847e-08
NCS1	5.41696	1.51678	0.24531	6.1831	6.28545e-10	3.64077e-08
RPL21	12.1145	1.44523	0.234251	6.16956	6.84809e-10	3.94664e-08
MXRA8	5.62789	1.54272	0.25026	6.16447	7.07185e-10	4.05512e-08
RPS6	12.9665	1.47969	0.240308	6.15747	7.39179e-10	4.21739e-08
ITIH4	3.93127	-2.00004	0.325582	-6.14296	8.09953e-10	4.59819e-08
MECP2	9.05405	1.24074	0.202045	6.14088	8.2064e-10	4.63581e-08
RPS18	9.50347	1.5279	0.249603	6.12133	9.27951e-10	5.21618e-08
HSPA8	11.1829	1.15279	0.188397	6.11891	9.42169e-10	5.27015e-08
RPS19	9.69682	1.60656	0.262768	6.114	9.71618e-10	5.40836e-08
H3-3A	8.25581	1.39967	0.229067	6.11031	9.94363e-10	5.50809e-08
MYOZ2	4.97625	-1.56052	0.255718	-6.10251	1.04418e-09	5.75612e-08
HSP90B1	8.73907	1.21101	0.19875	6.0931	1.10744e-09	6.07546e-08
S100A10	5.98887	1.78163	0.293456	6.07119	1.26964e-09	6.93197e-08
RPL34	16.3182	1.45824	0.240232	6.07016	1.27786e-09	6.94367e-08
RPL5	17.3086	1.25802	0.207306	6.06845	1.29149e-09	6.98443e-08
YWHAE	9.52381	1.23832	0.205032	6.03967	1.54432e-09	8.31239e-08
RPN1	5.71018	1.34041	0.221975	6.03856	1.55494e-09	8.33027e-08
H4C5	5.3229	1.64986	0.273589	6.03041	1.63544e-09	8.72055e-08
RPL18	16.1332	1.79304	0.297817	6.02062	1.73754e-09	9.22188e-08
FSCN1	6.04065	1.34552	0.224068	6.00497	1.91365e-09	1.01095e-07
RPS15	11.7403	1.5595	0.260023	5.99757	2.00293e-09	1.05325e-07
VAT1	3.82351	1.68903	0.281692	5.99602	2.02218e-09	1.05849e-07
RPL38	12.1707	1.56208	0.26065	5.993	2.06e-09	1.07337e-07
LDHB	8.19591	1.15575	0.194007	5.95723	2.56546e-09	1.33066e-07
PLAUR	5.15387	-1.65375	0.277783	-5.95339	2.62644e-09	1.35612e-07
CLIC6	4.97485	1.25844	0.211642	5.94606	2.74679e-09	1.41187e-07
EIF3L	6.82224	1.3604	0.229158	5.93649	2.91188e-09	1.49002e-07
NPM1	12.6233	1.51938	0.256037	5.93423	2.9523e-09	1.50396e-07
DHRS1	9.60022	1.22517	0.206551	5.93155	3.00083e-09	1.52189e-07
SEC61G	3.98783	1.59965	0.269955	5.9256	3.11155e-09	1.57106e-07
HNRNPD	8.17282	1.09012	0.184166	5.91924	3.23428e-09	1.62583e-07
SRP14	5.47547	1.47061	0.24884	5.90988	3.4236e-09	1.71345e-07
HSP90AB1	20.4321	0.968551	0.164319	5.89435	3.76169e-09	1.87444e-07
RPL35	18.3556	1.26834	0.215361	5.88935	3.87721e-09	1.9236e-07
CRIP2	10.5933	1.32407	0.225642	5.86799	4.41122e-09	2.17907e-07
RPS27	9.34509	1.30796	0.223001	5.86525	4.48459e-09	2.19894e-07
TMEM182	4.13063	-1.71706	0.292761	-5.86505	4.49e-09	2.19894e-07
HNRNPK	8.24278	1.16026	0.198308	5.85081	4.8919e-09	2.37538e-07
GALNT2	4.93732	1.27279	0.217531	5.85105	4.88482e-09	2.37538e-07
SSMEM1	3.26069	1.67744	0.287878	5.82691	5.64627e-09	2.73007e-07
POSTN	6.37507	-1.53007	0.262727	-5.82382	5.75186e-09	2.76939e-07
TUBA1C	53.8232	1.34491	0.23119	5.81732	5.97985e-09	2.85506e-07
HDLBP	7.4377	1.24092	0.21331	5.81748	5.97414e-09	2.85506e-07
R3HDM4	38.8798	1.1271	0.194651	5.79036	7.02348e-09	3.33937e-07
EGR1	12.927	-0.933422	0.16152	-5.779	7.5147e-09	3.5581e-07
DLL1	5.77001	1.21451	0.210285	5.77555	7.67031e-09	3.61677e-07
RPL11	5.94227	1.50361	0.260556	5.77077	7.89122e-09	3.70563e-07
BCL2L11	5.03781	1.37502	0.23849	5.76552	8.14087e-09	3.80719e-07
THBS4	6.1091	-2.06074	0.358087	-5.75485	8.67184e-09	4.03896e-07
SLC25A6	5.77487	1.45077	0.252407	5.74772	9.04546e-09	4.19585e-07
SDF4	4.66902	1.56874	0.274371	5.71757	1.0806e-08	4.99221e-07
MYH3	160.316	-1.18865	0.208958	-5.68847	1.28182e-08	5.89794e-07
DGCR6L	5.66298	1.48847	0.261865	5.68411	1.31498e-08	6.02618e-07
PRKAG3	2.828	-2.09519	0.36891	-5.67941	1.35157e-08	6.16909e-07
HSPB1	8.44458	1.4699	0.259192	5.67107	1.41911e-08	6.45156e-07
HMGN1	8.29003	1.17544	0.207379	5.6681	1.44387e-08	6.53807e-07
LAIR1	4.72506	1.3113	0.231664	5.66036	1.51056e-08	6.81304e-07
FKBP1A	5.10111	1.59946	0.282798	5.65584	1.55088e-08	6.96735e-07
RPL15	13.7358	1.51052	0.267718	5.6422	1.67895e-08	7.49353e-07
OS9	4.17003	1.46595	0.25983	5.64197	1.68114e-08	7.49353e-07
HIPK4	2.8789	-1.81637	0.322972	-5.62393	1.86663e-08	8.28796e-07
TPI1	14.6204	1.15531	0.205493	5.62215	1.88599e-08	8.34149e-07
DDR1	7.53114	1.26278	0.225042	5.61132	2.00794e-08	8.84656e-07
RPLP0	5.24528	1.56261	0.278801	5.60475	2.08555e-08	9.15317e-07
EEF1G	20.5507	1.26988	0.227307	5.58662	2.31535e-08	1.01228e-06
COX6A1	4.11411	1.55916	0.279234	5.58372	2.35424e-08	1.02535e-06
RPL4	20.8281	1.20432	0.215862	5.57914	2.41717e-08	1.04876e-06
TMED9	4.2122	1.38837	0.249212	5.57104	2.53221e-08	1.09451e-06
LRPAP1	3.87164	1.39673	0.251228	5.55961	2.70381e-08	1.16427e-06
GUK1	3.25643	1.60264	0.288814	5.54904	2.87245e-08	1.23224e-06
CA3	3.58873	-1.81348	0.326879	-5.54786	2.89191e-08	1.23594e-06
WIPF3	5.25732	-1.50888	0.2721	-5.54532	2.93422e-08	1.24934e-06
CD151	8.99205	1.06713	0.192744	5.53652	3.08548e-08	1.30576e-06
PTTG1IP	4.3692	1.39563	0.252089	5.53628	3.0896e-08	1.30576e-06
RPS21	6.87178	1.51585	0.274391	5.52441	3.30603e-08	1.39207e-06
TMEM109	5.09999	1.19827	0.217169	5.51766	3.43537e-08	1.44121e-06
SBK2	3.49463	1.66284	0.301407	5.51692	3.45e-08	1.44205e-06
MB	3.6943	-1.68788	0.307242	-5.49363	3.9375e-08	1.63981e-06
OGN	3.46028	-1.90932	0.347974	-5.48695	4.08923e-08	1.69681e-06
PPDPF	4.46078	1.66895	0.304589	5.47936	4.26877e-08	1.76489e-06
SYPL2	3.44477	-1.77375	0.323842	-5.47719	4.32122e-08	1.78012e-06
CHD3	4.86356	1.38792	0.254437	5.45486	4.90116e-08	2.01177e-06
QSOX1	3.41755	1.57747	0.289225	5.45413	4.92128e-08	2.01279e-06
TMSB10	28.7009	1.2296	0.225571	5.45103	5.00776e-08	2.04084e-06
MYBPH	45.2048	-1.33173	0.244999	-5.43567	5.45912e-08	2.21687e-06
B4GALT1	4.78728	1.24545	0.229192	5.43409	5.50777e-08	2.22869e-06
PYGB	3.78911	1.55951	0.287204	5.42997	5.63648e-08	2.27272e-06
MICAL1	6.35234	1.25116	0.230551	5.42683	5.73638e-08	2.30485e-06
CHRNB1	11.808	0.982629	0.181392	5.41717	6.05505e-08	2.42436e-06
EHBP1L1	8.34442	-1.00319	0.185933	-5.39546	6.8348e-08	2.72699e-06
TOMM20	5.21296	1.19941	0.223109	5.3759	7.61997e-08	3.01915e-06
TMBIM6	4.2888	1.44632	0.269023	5.3762	7.60741e-08	3.01915e-06
CTHRC1	5.13708	1.28367	0.239269	5.36495	8.09723e-08	3.19715e-06
FBL	4.10563	1.34554	0.251105	5.35847	8.39274e-08	3.3024e-06
POLR2L	4.80227	1.45149	0.271205	5.35199	8.69934e-08	3.41128e-06
ITGA5	7.43335	0.979571	0.183128	5.34911	8.83859e-08	3.45401e-06
TNFAIP8	34.2707	-0.862788	0.161367	-5.34673	8.95573e-08	3.48785e-06
PLCE1	4.68775	-1.37436	0.257369	-5.34003	9.29326e-08	3.60699e-06
KIFC3	5.54324	1.08811	0.204217	5.32822	9.9181e-08	3.83645e-06
PLAT	5.54492	1.25786	0.236175	5.32596	1.0042e-07	3.87125e-06
RPL30	12.9976	1.26134	0.237172	5.31827	1.04759e-07	4.02495e-06
LRAT	2.96131	1.76596	0.332571	5.31003	1.09607e-07	4.19708e-06
CNN2	6.21854	1.21856	0.229749	5.3039	1.13356e-07	4.32611e-06
ANXA1	5.54957	1.48606	0.280241	5.30281	1.14034e-07	4.33747e-06
ILF3	9.15806	1.02047	0.192484	5.30156	1.14819e-07	4.35283e-06
COL1A2	209.881	1.16876	0.221088	5.28639	1.24754e-07	4.71379e-06
SURF4	3.41716	1.38759	0.262597	5.28411	1.26319e-07	4.75716e-06
SORBS2	4.30253	-1.46131	0.276636	-5.28242	1.27486e-07	4.78533e-06
IGFBP5	13.4756	1.21242	0.229566	5.28135	1.28234e-07	4.79762e-06
MYL12B	15.4003	1.06368	0.201602	5.27615	1.31926e-07	4.91963e-06
KIF1B	12.0946	-0.905165	0.171752	-5.2702	1.36278e-07	5.06538e-06
SEPTIN9	11.4165	1.1437	0.217449	5.25961	1.44365e-07	5.33146e-06
TXNDC5	3.71911	1.43334	0.272519	5.2596	1.44371e-07	5.33146e-06
IGHMBP2	45.9364	0.9909	0.188799	5.24843	1.53403e-07	5.61053e-06
EIF4H	9.80415	1.01464	0.193299	5.24909	1.52853e-07	5.61053e-06
CALU	8.71362	1.03029	0.196284	5.24896	1.5296e-07	5.61053e-06
NDUFA1	3.49378	1.40593	0.268055	5.24492	1.56347e-07	5.69993e-06
NEU1	3.9243	1.64832	0.314307	5.2443	1.56873e-07	5.70089e-06
LAMP1	4.17041	1.20404	0.229681	5.24222	1.58652e-07	5.74008e-06
PPFIBP2	3.5503	-1.76133	0.336012	-5.24187	1.58958e-07	5.74008e-06
RAB13	3.1302	1.6111	0.309372	5.20765	1.91252e-07	6.88447e-06
RPN2	5.27459	1.0823	0.208049	5.20216	1.9699e-07	7.06872e-06
AEBP1	4.0345	1.36049	0.261938	5.19395	2.05879e-07	7.36454e-06
LDHC	4.50968	1.35385	0.261162	5.18396	2.17221e-07	7.74598e-06
LDHA	6.4825	1.37687	0.26581	5.17991	2.2199e-07	7.89136e-06
PTBP1	32.0891	1.10536	0.213465	5.17818	2.24059e-07	7.94019e-06
USP28	2.9496	-1.5035	0.290801	-5.1702	2.33847e-07	8.26139e-06
ZNF428	4.40486	1.3978	0.270624	5.1651	2.40308e-07	8.46344e-06
MYLK2	2.98661	-2.33224	0.452435	-5.15485	2.53829e-07	8.91213e-06
MRPL55	7.35659	0.974793	0.189472	5.14478	2.67834e-07	9.37503e-06
RPS13	9.56458	1.40092	0.2724	5.14286	2.70593e-07	9.44262e-06
EIF5A	7.73156	1.13036	0.220394	5.1288	2.91592e-07	1.01444e-05
FAU	4.42758	1.35253	0.2639	5.12517	2.97271e-07	1.03105e-05
CRABP2	6.71324	1.73313	0.338362	5.12212	3.02123e-07	1.04443e-05
RPS29	7.13699	1.17544	0.229506	5.1216	3.02959e-07	1.04443e-05
TRAM2	5.2291	1.45915	0.28503	5.11929	3.06686e-07	1.05409e-05
PPP1R14B	11.7839	1.20935	0.23647	5.11418	3.15102e-07	1.07977e-05
KRT8	3.81461	1.42092	0.277951	5.11212	3.18562e-07	1.08836e-05
MYL6	12.5416	1.04876	0.20524	5.10995	3.22248e-07	1.09766e-05
ATP5MC2	7.76119	1.03773	0.203259	5.10548	3.29954e-07	1.12057e-05
NUMA1	5.88939	1.09757	0.215108	5.10242	3.3534e-07	1.13548e-05
GANAB	6.12052	1.1075	0.217166	5.09976	3.40089e-07	1.14815e-05
RPS4Y1	7.10184	1.09142	0.214077	5.09826	3.42798e-07	1.15388e-05
MYADM	15.0287	1.19173	0.234273	5.0869	3.63961e-07	1.22152e-05
EEF1D	10.7542	1.01423	0.199786	5.07661	3.84226e-07	1.28575e-05
PFDN5	8.92306	-1.3808	0.272452	-5.06807	4.01879e-07	1.34089e-05
RPS16	7.33043	1.33177	0.262825	5.06714	4.03842e-07	1.34351e-05
P4HA2	4.10638	1.34734	0.266998	5.04626	4.50532e-07	1.49448e-05
PFKM	4.87309	-1.2828	0.254404	-5.04238	4.59771e-07	1.52071e-05
SMARCC1	4.7036	1.17973	0.233996	5.04166	4.61503e-07	1.52203e-05
RPS25	5.19098	1.30532	0.25904	5.03906	4.67813e-07	1.53839e-05
TUBB	5.14526	1.32148	0.26311	5.02254	5.09917e-07	1.67203e-05
RNF181	6.66293	1.16381	0.232514	5.00535	5.576e-07	1.82314e-05
GSTP1	6.10858	1.34972	0.270514	4.98944	6.05539e-07	1.97423e-05
MICALL2	225.853	1.27087	0.255344	4.9771	6.45454e-07	2.09837e-05
SH3BGRL3	3.64821	1.61328	0.324452	4.97232	6.6155e-07	2.14459e-05
ITGA4	7.16366	1.13939	0.229264	4.96979	6.70246e-07	2.16662e-05
MYOT	10.2885	-1.0578	0.213318	-4.9588	7.09297e-07	2.28638e-05
OAZ1	7.77298	1.04662	0.211345	4.95216	7.33938e-07	2.35915e-05
CLIC1	4.55572	1.31838	0.266396	4.94895	7.46156e-07	2.39168e-05
KLHL31	4.60541	-1.18861	0.241957	-4.91249	8.99262e-07	2.87436e-05
SEMA6D	3.11791	-1.6841	0.343301	-4.90561	9.31364e-07	2.96866e-05
ERGIC3	4.77849	1.13586	0.232217	4.89139	1.00124e-06	3.18249e-05
HNRNPM	5.33622	1.16131	0.237446	4.89083	1.00413e-06	3.1828e-05
THBS1	5.12549	1.32306	0.270739	4.88684	1.02468e-06	3.23895e-05
SAP18	4.29991	1.28968	0.264144	4.88249	1.04756e-06	3.30212e-05
GXYLT2	3.23299	1.42791	0.293023	4.87304	1.09894e-06	3.45456e-05
RPS9	7.92821	1.11575	0.229202	4.86799	1.12741e-06	3.53431e-05
TGFB3	4.7352	-1.23219	0.253562	-4.85953	1.17665e-06	3.67856e-05
RPSA	13.2022	1.01795	0.209579	4.85709	1.19121e-06	3.7139e-05
TM6SF1	2.42549	-1.6856	0.347519	-4.85039	1.23221e-06	3.83125e-05
PKM	15.2187	0.847385	0.174823	4.8471	1.25277e-06	3.88461e-05
SLC7A5	6.49486	0.991431	0.204599	4.84573	1.2615e-06	3.90106e-05
SLC38A2	9.14084	0.88411	0.182983	4.83164	1.35411e-06	4.17613e-05
WDR44	4.32764	-1.35692	0.28157	-4.81913	1.44187e-06	4.43483e-05
GRN	3.42808	1.31098	0.272701	4.80738	1.52923e-06	4.69087e-05
ACTR3	6.46932	0.931998	0.19403	4.80337	1.5602e-06	4.77306e-05
RPL35A	9.11059	1.04548	0.217986	4.7961	1.61788e-06	4.93627e-05
RAD51B	3.22657	1.47893	0.309153	4.78383	1.71988e-06	5.23348e-05
CRIP1	4.95242	1.52844	0.320532	4.76843	1.85671e-06	5.63481e-05
CAPRIN1	8.34097	0.908839	0.190775	4.76392	1.8987e-06	5.74697e-05
CAPNS1	9.50154	0.983048	0.206837	4.75277	2.00651e-06	6.05722e-05
NHLH2	57.8735	0.672408	0.141677	4.74607	2.07412e-06	6.24478e-05
CMYA5	3.49361	-1.29308	0.272525	-4.74483	2.08685e-06	6.26658e-05
TMEM82	1.74024	-2.17807	0.460296	-4.73189	2.22439e-06	6.66208e-05
SDHC	4.71639	1.07403	0.228848	4.69318	2.68988e-06	8.03512e-05
TMOD1	3.16335	-1.57393	0.335656	-4.6891	2.74403e-06	8.1755e-05
LMOD2	2.85382	-1.65057	0.352298	-4.68515	2.79749e-06	8.31308e-05
BTF3	10.1772	1.04101	0.222533	4.67798	2.8971e-06	8.58671e-05
SOX9	9.20487	0.891324	0.190584	4.6768	2.9139e-06	8.61413e-05
SERPINH1	5.51231	1.04287	0.223049	4.67554	2.93178e-06	8.64212e-05
RAC1	3.6338	1.25912	0.269327	4.67507	2.93852e-06	8.64212e-05
WNK1	3.88616	1.15179	0.246415	4.67421	2.9509e-06	8.65622e-05
GABARAP	6.60752	1.17424	0.251383	4.67114	2.99535e-06	8.76409e-05
CTNNA3	3.02024	-1.48424	0.317855	-4.66953	3.01888e-06	8.81034e-05
CACNG7	4.82914	-1.17414	0.251695	-4.66496	3.08683e-06	8.98566e-05
FAM187B	1.8965	-2.33984	0.502217	-4.65903	3.17695e-06	9.22449e-05
EIF2S3	4.20944	1.18333	0.254321	4.65291	3.27283e-06	9.45474e-05
LAT	3.89814	1.74029	0.373982	4.6534	3.26513e-06	9.45474e-05
DFFB	6.1578	-1.29332	0.278294	-4.64734	3.36244e-06	9.6891e-05
PCBP1	12.845	0.843675	0.182001	4.63555	3.55989e-06	0.000102322
HNRNPU	15.3859	0.703597	0.152158	4.62413	3.76169e-06	0.000107851
PCBP2	15.3684	0.90683	0.196538	4.61403	3.9494e-06	0.000112949
SOX4	8.04823	0.85464	0.185683	4.60269	4.17078e-06	0.000118982
KIAA2013	4.35956	1.10889	0.241144	4.59846	4.25618e-06	0.000121115
NOTCH3	5.07527	1.07352	0.23352	4.59713	4.2834e-06	0.000121587
PEG10	12.4072	-1.28475	0.279624	-4.59456	4.33655e-06	0.00012279
RPS26	6.38933	0.930405	0.203693	4.56769	4.93129e-06	0.000139285
NEURL1	2.62085	-1.46672	0.321889	-4.5566	5.19893e-06	0.000146482
SLC20A2	4.11396	-1.03259	0.227197	-4.54491	5.49577e-06	0.000154464
HSPB8	5.28895	-1.46032	0.32149	-4.54235	5.56307e-06	0.000155971
NACA	29.2293	0.925136	0.203828	4.5388	5.65751e-06	0.00015823
HMGN2	11.3774	0.803568	0.177324	4.53162	5.85325e-06	0.00016323
APLP2	3.81232	1.14794	0.25334	4.5312	5.86488e-06	0.00016323
PLXNA1	4.78488	1.17227	0.258792	4.52979	5.90433e-06	0.000163928
SCARB2	4.84251	1.09355	0.241544	4.52733	5.97345e-06	0.000165444
CANX	8.13772	0.946804	0.209299	4.52368	6.07734e-06	0.000167914
CSTB	3.09959	1.35554	0.299937	4.51941	6.2012e-06	0.000170922
CBX5	6.11549	0.949122	0.210057	4.5184	6.23101e-06	0.00017133
ARL6IP4	4.9351	1.16725	0.258538	4.51481	6.33746e-06	0.000173838
CASQ1	2.18355	-1.68767	0.373911	-4.51355	6.37524e-06	0.000174455
PLP2	3.67852	1.15449	0.256195	4.50631	6.59649e-06	0.000180078
SERBP1	12.0644	0.916353	0.203401	4.50516	6.63232e-06	0.000180624
TIMP2	4.69494	1.0357	0.230004	4.50298	6.70059e-06	0.000182049
EID1	4.83056	1.20585	0.268128	4.4973	6.88208e-06	0.000186535
VDAC1	5.51399	0.960744	0.213778	4.49412	6.98574e-06	0.000188805
COPA	4.79685	1.11592	0.248328	4.49372	6.99891e-06	0.000188805
CYB5R3	3.39432	1.27813	0.284616	4.49072	7.09836e-06	0.000191036
CHD4	8.44886	0.80176	0.178783	4.48454	7.30715e-06	0.000196193
GADD45G	4.60292	1.09114	0.243816	4.47525	7.63216e-06	0.000204438
HNRNPA0	4.52355	1.04676	0.233993	4.47348	7.69579e-06	0.00020566
LSM7	3.97224	1.26155	0.282725	4.46209	8.11629e-06	0.00021639
TAGLN3	4.35212	1.10555	0.248071	4.45658	8.32761e-06	0.000221507
SPCS1	3.2539	1.25711	0.282258	4.45376	8.43793e-06	0.000223919
CST3	3.59931	1.6617	0.373196	4.45263	8.48256e-06	0.000224581
LZTS2	5.8095	0.900502	0.202498	4.44696	8.70928e-06	0.00023005
H3-3B	7.67793	1.03532	0.232908	4.4452	8.78107e-06	0.000231411
CHPF	7.72705	0.958276	0.216057	4.43529	9.19492e-06	0.000241759
CDK2AP1	6.05517	1.00451	0.226765	4.42977	9.43358e-06	0.000247067
PDAP1	4.65188	1.06405	0.240212	4.42962	9.4401e-06	0.000247067
GFAP	3.8744	1.23466	0.278854	4.42763	9.52745e-06	0.000248782
RETREG1	1.97591	-1.70425	0.385443	-4.42152	9.80096e-06	0.00025534
SELENOW	9.61269	1.20187	0.271964	4.41923	9.90525e-06	0.000257469
RPL23	9.1885	0.883631	0.200151	4.41482	1.01093e-05	0.000262176
LAPTM4A	7.06607	0.803111	0.181974	4.41332	1.01798e-05	0.000263406
SLC25A3	6.4362	0.947039	0.214638	4.41227	1.02294e-05	0.00026409
JPT1	10.4778	0.912079	0.206803	4.41038	1.03192e-05	0.000264872
ARF1	6.96415	1.05346	0.238871	4.41016	1.03293e-05	0.000264872
ABR	3.73076	1.14352	0.259286	4.41027	1.0324e-05	0.000264872
AP2M1	5.48026	1.2492	0.283437	4.40734	1.04649e-05	0.000267746
GGTLC1	5.32759	-1.12848	0.25645	-4.40041	1.08047e-05	0.000275822
IFI27	2.26445	-1.70529	0.388785	-4.3862	1.1535e-05	0.000293809
S100A13	3.6492	1.30701	0.29841	4.37992	1.18721e-05	0.000301721
LRRC39	3.04434	-1.33609	0.305162	-4.3783	1.19606e-05	0.000303294
TOMM6	3.69878	1.27487	0.291317	4.37624	1.20745e-05	0.000305503
HNRNPDL	12.4533	0.805577	0.184105	4.37563	1.21084e-05	0.000305682
ATP1B2	1.99609	-1.79952	0.412329	-4.36428	1.2754e-05	0.000321272
SAMD5	3.12358	1.39492	0.319795	4.36191	1.28933e-05	0.000324066
MYMX	2.58536	1.39738	0.320463	4.3605	1.29765e-05	0.000325438
APP	8.77089	0.755876	0.173626	4.35347	1.33996e-05	0.000335314
EIF3G	4.34601	1.0752	0.247134	4.35067	1.35721e-05	0.000338886
DYNLL1	5.35788	1.09872	0.252936	4.34387	1.39993e-05	0.000348031
RAP2B	4.92743	1.63571	0.376533	4.34415	1.39818e-05	0.000348031
SERPINE2	3.60704	1.82328	0.420232	4.33874	1.43301e-05	0.00035548
LMAN1	4.16525	1.15129	0.265792	4.33154	1.48073e-05	0.000366521
SET	4.09907	1.13861	0.263732	4.31731	1.57946e-05	0.000390112
SPTB	2.88698	-1.64903	0.382216	-4.3144	1.60035e-05	0.000394419
C9orf85	3.77327	-1.09758	0.254522	-4.31233	1.6154e-05	0.00039727
PALLD	11.0019	0.876658	0.203391	4.31022	1.63095e-05	0.000400231
DUX5	65.7261	0.858589	0.199607	4.30139	1.69728e-05	0.000415616
TOMM7	3.3977	1.28724	0.299315	4.30064	1.70307e-05	0.000416139
MGP	3.84886	1.26291	0.293731	4.29955	1.71148e-05	0.0004173
NOTCH1	3.97353	1.1029	0.256705	4.29635	1.73636e-05	0.000422465
DAAM1	2.76313	-1.42581	0.33214	-4.2928	1.76432e-05	0.000428354
GOT2	2.87764	1.2156	0.283249	4.29163	1.77368e-05	0.000429713
ASAP3	5.5274	-1.62527	0.378794	-4.29063	1.78165e-05	0.000430729
GNAS	22.1678	-0.948153	0.221657	-4.27758	1.88939e-05	0.000455811
ATP5MG	4.37149	1.04259	0.244163	4.27006	1.95416e-05	0.000470442
TRIM8	6.0133	0.931201	0.218143	4.26876	1.96562e-05	0.000472205
BBLN	8.69168	0.795841	0.186526	4.26664	1.98435e-05	0.000473711
SPATS2L	5.20424	1.00996	0.236675	4.26728	1.97875e-05	0.000473711
PLAAT1	1.96502	-1.67608	0.392829	-4.2667	1.98385e-05	0.000473711
ALG2	4.18465	1.22471	0.287275	4.2632	2.01523e-05	0.000480078
SFPQ	12.9104	0.704285	0.165311	4.26037	2.04087e-05	0.00048316
B3GNT6	2.70347	-1.85472	0.435318	-4.26061	2.03867e-05	0.00048316
P4HA3	2.49347	-1.78248	0.418357	-4.26068	2.03808e-05	0.00048316
CSHL1	3.55271	1.13792	0.267383	4.25576	2.08342e-05	0.000492213
CDH13	4.15682	1.14154	0.268577	4.25033	2.13456e-05	0.000503253
PRDX1	6.66002	0.968699	0.228004	4.2486	2.15114e-05	0.000506116
SDC2	4.26662	1.05713	0.24887	4.24774	2.15939e-05	0.000507012
PRKAA2	2.21548	-1.5502	0.365344	-4.24314	2.20416e-05	0.000516462
CSPG4	6.3522	0.885301	0.208917	4.23757	2.25955e-05	0.000528355
CKB	33.135	0.967334	0.228318	4.23678	2.2675e-05	0.00052913
SEC11A	3.99871	1.36215	0.321671	4.23459	2.28971e-05	0.000533222
MMP14	7.42878	0.951468	0.225046	4.22789	2.35896e-05	0.000546006
CD99	5.18565	0.949964	0.224676	4.22814	2.35626e-05	0.000546006
ALDH1B1	3.87919	1.04982	0.248284	4.22833	2.35433e-05	0.000546006
ITGA6	7.21469	-1.58571	0.375431	-4.22369	2.40331e-05	0.000555145
U2AF1	6.14164	1.00858	0.238967	4.22056	2.43692e-05	0.000561771
HNRNPF	3.63757	1.15316	0.273269	4.21987	2.44444e-05	0.000562369
IFT140	2.75144	1.29204	0.306508	4.21536	2.49378e-05	0.000572565
XRCC6	5.54725	0.838573	0.199004	4.21385	2.51059e-05	0.000575267
CD24	2.42366	-1.31318	0.312407	-4.20342	2.62918e-05	0.000601234
PBXIP1	6.40288	0.991546	0.236329	4.19562	2.72127e-05	0.000621049
ZYX	8.64311	0.994679	0.237233	4.19284	2.75486e-05	0.000627459
SLC3A2	4.34877	0.99035	0.236231	4.1923	2.76146e-05	0.00062771
EVL	9.43337	0.84644	0.201948	4.19138	2.77266e-05	0.000629004
TM9SF3	6.24602	0.879526	0.209918	4.18985	2.79143e-05	0.000630753
RASAL2	2.44416	-1.2698	0.303044	-4.19015	2.78768e-05	0.000630753
RAB1B	5.80618	1.10906	0.264819	4.18801	2.81415e-05	0.000633377
MFSD12	3.42467	1.39165	0.332262	4.18841	2.80916e-05	0.000633377
C10orf71	2.81547	-1.24831	0.298103	-4.18752	2.82021e-05	0.000633492
COL4A1	4.43142	1.00929	0.241336	4.18208	2.8886e-05	0.000646309
MVP	3.23006	1.23321	0.294875	4.18216	2.88756e-05	0.000646309
ACP6	2.10822	-1.63978	0.393551	-4.16663	3.09137e-05	0.000690325
TXN	2.74698	1.36157	0.326981	4.16406	3.12641e-05	0.000696786
GNAI2	6.5664	0.937884	0.225259	4.16358	3.13303e-05	0.0006969
FBXW7	4.81915	-1.18102	0.284364	-4.15321	3.27845e-05	0.000727828
HDGFL1	2.97631	-1.15476	0.278439	-4.14727	3.36467e-05	0.00074552
H2BC8	5.51189	1.74968	0.422367	4.14256	3.43453e-05	0.000758558
KLHL13	2.79701	-1.22416	0.29552	-4.14241	3.43681e-05	0.000758558
TATDN1	4.53538	-1.15807	0.27976	-4.13951	3.48049e-05	0.000766716
COX6C	3.65994	1.0164	0.246276	4.1271	3.67368e-05	0.000807715
RNF208	4.24428	-1.05837	0.256556	-4.1253	3.70248e-05	0.000812481
CERS6	3.36032	-1.13672	0.275593	-4.12464	3.71308e-05	0.000813243
PAFAH1B2	8.50244	0.979903	0.237668	4.12299	3.73984e-05	0.000817534
DSTN	3.28433	1.1633	0.282202	4.12223	3.75228e-05	0.000818685
FLNC	19.5174	0.745203	0.180832	4.12096	3.77291e-05	0.000821617
ZSWIM6	2.98032	1.27681	0.310022	4.11845	3.81422e-05	0.00082903
ADM	3.20939	1.11046	0.269984	4.11308	3.90418e-05	0.000846969
ATP5F1B	10.3218	0.746712	0.18164	4.11094	3.94043e-05	0.000853212
TRDN	3.61522	-1.19854	0.291726	-4.10843	3.98361e-05	0.000860927
PSD2	3.93787	1.15097	0.280232	4.10722	4.00445e-05	0.000863795
PITX2	5.42395	0.837477	0.203928	4.10672	4.01313e-05	0.000864034
TNNC2	31.8929	-0.922451	0.224688	-4.10548	4.03481e-05	0.000867067
TEX9	7.60701	-0.903928	0.220233	-4.10441	4.05346e-05	0.000869438
CYB5R1	12.5018	0.874988	0.213395	4.10032	4.12574e-05	0.000883281
THY1	3.49456	1.2295	0.299961	4.09886	4.15186e-05	0.000887207
MYOG	40.1452	0.898523	0.219303	4.09718	4.18207e-05	0.000890328
WNT9A	10.796	0.860022	0.2099	4.09729	4.18024e-05	0.000890328
HLA-DQB1	5.43658	-1.29134	0.315286	-4.09577	4.20769e-05	0.000893392
ZNHIT1	4.45657	1.04921	0.256184	4.09553	4.21212e-05	0.000893392
PRSS23	3.27696	1.23506	0.302388	4.08434	4.42019e-05	0.000935784
NUTF2	5.09614	0.982658	0.240846	4.08003	4.50298e-05	0.000951546
RHPN1	2.13601	-1.67133	0.410518	-4.07126	4.67591e-05	0.000986262
XRCC5	6.77815	0.933019	0.229375	4.06766	4.74881e-05	0.000999791
PDIA3	3.38987	1.0898	0.268166	4.06392	4.82556e-05	0.00101408
ADRA2B	2.47698	-2.02356	0.498312	-4.06082	4.89e-05	0.00102573
ANAPC13	2.53513	1.29926	0.320257	4.05691	4.97261e-05	0.00104115
PPIAL4F	4.11493	1.05374	0.259789	4.05614	4.98906e-05	0.00104268
TAF15	5.64768	0.861638	0.212682	4.0513	5.09336e-05	0.00106253
FLYWCH2	6.02324	0.983748	0.243007	4.04823	5.1606e-05	0.00107459
TMED2	3.84356	1.03718	0.256414	4.04496	5.23313e-05	0.00108771
PLCD1	2.35017	-1.55452	0.384391	-4.04411	5.2522e-05	0.00108969
RPL36AL	3.35492	1.6472	0.407884	4.0384	5.38165e-05	0.00111452
CARMIL3	2.8095	-2.03253	0.503441	-4.03728	5.40746e-05	0.00111784
ATP6V0C	3.8163	1.06634	0.26472	4.02818	5.62113e-05	0.0011599
TP63	3.08084	-1.16079	0.288624	-4.0218	5.77547e-05	0.0011896
CNIH2	2.81104	-1.35547	0.337081	-4.02119	5.79061e-05	0.00119057
WRNIP1	6.08788	0.974117	0.242279	4.02064	5.80408e-05	0.00119083
S100A16	2.88785	1.31861	0.32799	4.02029	5.81275e-05	0.00119083
TRIM54	7.92422	-0.802724	0.199698	-4.01969	5.82751e-05	0.00119172
CHSY1	3.71751	1.03744	0.258796	4.00872	6.10478e-05	0.00124618
IL32	11.2648	-0.977693	0.244137	-4.00469	6.20979e-05	0.00126517
PSMB2	4.5662	1.02859	0.256872	4.00431	6.21997e-05	0.00126517
CLASP1	3.98478	-0.965164	0.241087	-4.00339	6.24412e-05	0.00126782
HNRNPH3	9.33297	0.742729	0.185641	4.00088	6.31067e-05	0.00127906
TCEAL9	5.23443	0.823297	0.205918	3.99817	6.38335e-05	0.0012915
GPD1	1.92586	-1.75697	0.439535	-3.99734	6.40573e-05	0.00129373
ARPC1B	2.9631	1.19874	0.29994	3.99658	6.42629e-05	0.00129559
SCYL3	2.84196	-1.15478	0.289339	-3.99109	6.57699e-05	0.00132363
GOLGA8F	7.05829	1.09055	0.273409	3.98873	6.64291e-05	0.00133455
IQSEC1	5.05377	0.870126	0.2186	3.98044	6.87873e-05	0.00137949
ISG15	3.45625	-1.51909	0.381864	-3.97811	6.94666e-05	0.00139067
ARPC3	3.40494	1.09451	0.275431	3.97381	7.07319e-05	0.00141352
ATP2B1	9.09435	0.807128	0.203198	3.97212	7.12348e-05	0.00142108
ABCG1	3.93367	1.04444	0.263043	3.97059	7.16937e-05	0.00142774
CCNI	8.33794	0.88401	0.222703	3.96946	7.20352e-05	0.00143204
TPM2	65.8984	-0.837372	0.211166	-3.96546	7.32533e-05	0.0014512
CACNG1	4.4163	-1.01126	0.255005	-3.96565	7.31965e-05	0.0014512
AHNAK	12.8193	0.805626	0.203391	3.96098	7.46434e-05	0.00147618
ITGB5	2.89651	1.2227	0.30875	3.96016	7.49008e-05	0.00147871
CCT7	5.0183	0.869356	0.219629	3.9583	7.54845e-05	0.00148766
EYA2	2.68238	1.17841	0.297745	3.95778	7.56481e-05	0.00148831
IRF1	2.42911	-1.29114	0.326267	-3.95731	7.57996e-05	0.00148873
PPP6R1	4.74151	0.949695	0.240089	3.9556	7.63416e-05	0.00149679
COX6B1	4.81355	1.09229	0.276244	3.95408	7.68307e-05	0.0015038
RBP3	2.56424	-1.96425	0.497265	-3.95011	7.81154e-05	0.00152633
MAP1A	6.60466	0.741692	0.188062	3.94386	8.01798e-05	0.00156399
SRF	4.98334	0.995825	0.252602	3.94226	8.07163e-05	0.00157176
P3H1	3.18105	1.06871	0.271215	3.94047	8.13234e-05	0.00157552
PTCH1	2.23904	-1.5316	0.388676	-3.94055	8.12937e-05	0.00157552
LGI1	2.65392	-1.65396	0.419717	-3.94066	8.12587e-05	0.00157552
NR4A1	3.19205	-1.09863	0.278842	-3.93998	8.14892e-05	0.00157606
SLC38A5	2.29412	1.37863	0.350054	3.93833	8.20505e-05	0.00158416
PDGFD	2.02075	-1.62329	0.412219	-3.93793	8.21859e-05	0.00158416
ADPRHL1	2.75984	-1.19635	0.30418	-3.93304	8.38775e-05	0.00161404
EZR	3.79786	1.06793	0.272063	3.92532	8.66143e-05	0.0016639
CSDE1	11.2444	0.747824	0.190761	3.92021	8.84711e-05	0.00169435
ELOB	4.16572	1.04872	0.26752	3.92014	8.84964e-05	0.00169435
LCE3B	2.16332	-1.43668	0.366593	-3.91902	8.89115e-05	0.00169945
C4orf54	3.8032	-1.18461	0.302739	-3.91297	9.11689e-05	0.00173968
GP9	2.77149	-1.27546	0.326035	-3.91203	9.15235e-05	0.00174353
UGP2	4.01102	-0.977158	0.250281	-3.90425	9.45172e-05	0.00179756
RSL1D1	4.49159	1.52707	0.391749	3.89807	9.69607e-05	0.00184096
CTDSPL	2.5644	-1.2535	0.321726	-3.89616	9.77282e-05	0.00185245
FKBP2	2.92907	1.15368	0.296473	3.89133	9.96946e-05	0.00188659
CDK4	3.99475	0.885332	0.22756	3.89054	0.000100022	0.00188965
CREB3L2	3.71026	1.02999	0.265149	3.88458	0.000102506	0.00193339
FAM83C	4.2169	-1.02424	0.264099	-3.87822	0.000105223	0.00198135
MRFAP1	7.83049	0.829738	0.214078	3.87587	0.000106244	0.00199728
TFG	4.98869	1.21947	0.31468	3.87528	0.000106502	0.00199884
CSNK2B	5.07168	0.852336	0.220043	3.8735	0.000107284	0.00200692
REELD1	2.82823	-1.79725	0.463969	-3.87364	0.000107221	0.00200692
REPIN1	6.35723	0.95331	0.246146	3.87294	0.00010753	0.00200823
TSPAN7	2.31879	-1.31632	0.339989	-3.87166	0.000108098	0.00201554
NOP53	4.09489	0.938383	0.242462	3.87023	0.000108732	0.00202405
SGSM3	4.49606	0.87776	0.22741	3.85981	0.000113474	0.00210887
CCNG2	6.09814	0.811416	0.210386	3.8568	0.00011488	0.00213154
EPN1	4.8089	0.924978	0.240132	3.85195	0.00011718	0.00216717
TALDO1	3.82564	0.974078	0.252857	3.85228	0.000117023	0.00216717
COX8A	5.13924	0.855703	0.2223	3.84931	0.00011845	0.00218588
HIF1A	4.039	1.00305	0.260596	3.84905	0.000118575	0.00218588
PPP1CB	6.05425	0.742986	0.19312	3.84727	0.000119441	0.00219474
PSMD7	3.57205	0.984485	0.255878	3.84748	0.000119337	0.00219474
NKAIN4	2.49249	-1.18427	0.307881	-3.84653	0.000119801	0.00219782
ANKRD44	3.4379	-1.10472	0.287231	-3.8461	0.000120015	0.00219822
NAV2	3.60297	-1.10333	0.287043	-3.84378	0.000121155	0.00221555
P2RX1	6.31524	0.779634	0.203378	3.83343	0.000126371	0.00230723
ABHD2	3.18813	1.05194	0.274474	3.83255	0.000126821	0.00231174
NHP2	3.75803	1.04717	0.273503	3.82873	0.000128808	0.00234422
CD164	4.47412	0.863449	0.225715	3.8254	0.000130562	0.00237236
PAGE5	21.6757	-0.928173	0.242768	-3.82328	0.000131686	0.00238228
SEC31A	5.87443	0.839017	0.219464	3.82302	0.000131826	0.00238228
GALNTL5	3.13631	-1.21325	0.317372	-3.8228	0.000131943	0.00238228
HES1	2.24664	-1.34071	0.350637	-3.82363	0.0001315	0.00238228
HSP90AA1	5.35588	0.922163	0.241297	3.82169	0.000132539	0.00238622
JAM3	6.70636	0.856104	0.224016	3.82162	0.000132579	0.00238622
FLG2	1.64243	-1.71892	0.449936	-3.82036	0.000133255	0.00239461
ISLR	3.38325	1.01351	0.265398	3.81882	0.000134089	0.00240581
ARHGDIA	7.07063	0.838643	0.219806	3.81538	0.000135971	0.00243574
H3C13	7.99568	0.813411	0.213217	3.81495	0.000136212	0.00243624
SIPA1L3	4.20091	0.9726	0.255038	3.81355	0.000136986	0.00244624
SERPINB6	4.02424	0.911039	0.239218	3.80841	0.000139864	0.00249374
MRGPRX4	5.04195	-0.967876	0.254347	-3.80534	0.000141611	0.00252094
LUM	2.69513	-1.30783	0.343743	-3.80467	0.000141992	0.00252378
LASP1	4.90789	0.980949	0.258361	3.79682	0.000146567	0.00260105
DUSP4	2.74609	1.12777	0.297227	3.79431	0.000148053	0.00262334
MARCKS	15.1528	0.712781	0.18788	3.79382	0.00014835	0.00262452
ACIN1	5.97545	0.820737	0.216623	3.78878	0.000151391	0.00267419
PDIA6	4.36871	0.965729	0.255217	3.78394	0.000154363	0.00272246
RUSC2	4.99365	-1.21151	0.32029	-3.78254	0.000155235	0.00273362
C4orf45	1.74574	-1.52947	0.404635	-3.77988	0.000156901	0.0027587
RPL14	12.944	0.887092	0.234905	3.77639	0.000159119	0.0027934
SND1	5.86261	0.827425	0.219511	3.7694	0.000163637	0.00286438
NT5DC2	2.6984	1.12515	0.298499	3.76936	0.000163664	0.00286438
NES	24.1874	0.811168	0.215339	3.76693	0.000165268	0.00288759
OPN1LW	1.81372	-1.54477	0.410124	-3.76658	0.000165497	0.00288759
RNF144B	2.39551	-1.36142	0.361496	-3.76606	0.000165841	0.00288918
SMIM17	39.4711	-0.611018	0.162298	-3.76479	0.00016669	0.00289955
UBE2L3	5.09823	0.787619	0.209299	3.76314	0.000167796	0.00291433
DNAJA4	4.21392	-1.02985	0.274502	-3.75168	0.000175651	0.00304613
MEOX2	2.33184	-1.45872	0.388963	-3.75028	0.000176635	0.00305854
NDUFB8	3.95493	1.0151	0.270812	3.74837	0.000177988	0.0030773
UNC13D	2.58267	-1.20039	0.320467	-3.74574	0.000179864	0.00310226
DHRS11	2.28945	-1.53703	0.410359	-3.74558	0.000179975	0.00310226
FARSA	3.43099	1.14818	0.306748	3.74308	0.000181779	0.00312862
SAPCD2	2.34748	-1.54411	0.413012	-3.73866	0.000185006	0.00317938
ZNF774	1.78301	-1.57583	0.421567	-3.73802	0.000185477	0.00318267
STRAP	3.7967	1.03761	0.277619	3.73753	0.00018584	0.00318411
CLSTN2	5.41801	-1.16664	0.312218	-3.73663	0.000186503	0.00319068
DTNA	3.12555	-1.11155	0.297554	-3.73564	0.000187241	0.00319851
IZUMO1R	2.40779	-1.25759	0.336861	-3.73327	0.000189008	0.00322387
CKMT2	3.38266	-1.31159	0.351365	-3.73285	0.000189328	0.00322451
CCDC90B	3.32212	1.05036	0.281763	3.72781	0.000193155	0.00328478
ITGAV	6.99745	0.713715	0.191537	3.72625	0.000194351	0.00330021
GSK3A	3.80125	0.970859	0.260794	3.7227	0.000197104	0.00334198
TEAD4	6.73306	0.763078	0.205481	3.71363	0.00020431	0.00345482
MT2A	2.6533	1.26667	0.341094	3.71356	0.000204364	0.00345482
PRRC2B	9.99273	0.825753	0.222449	3.71209	0.000205552	0.00346975
PLTP	3.31173	1.06586	0.28742	3.70835	0.000208612	0.00350772
CACNB1	3.7478	-0.94111	0.253743	-3.70891	0.000208155	0.00350772
STC2	2.59143	1.17397	0.316586	3.70822	0.000208723	0.00350772
PFKL	3.8014	1.05856	0.285534	3.70732	0.000209465	0.00351501
UBE2I	3.58185	0.992311	0.267795	3.70549	0.000210986	0.00353533
PPIAL4A	3.6529	1.00412	0.271054	3.70451	0.000211796	0.0035437
NEU3	1.91137	-1.4055	0.379471	-3.70383	0.000212365	0.00354802
PSENEN	2.94524	1.11	0.299828	3.70213	0.000213796	0.0035667
TRMT112	3.82455	1.02815	0.277855	3.70031	0.000215335	0.00358713
CACNA2D1	9.19937	-0.791026	0.213848	-3.69902	0.000216436	0.00360023
HNRNPA3	10.7716	0.75329	0.203747	3.69719	0.000217999	0.00362094
CYP2J2	2.37835	-1.38277	0.37405	-3.69675	0.000218376	0.00362194
SSB	4.91518	0.791818	0.214272	3.69539	0.000219546	0.00363605
PIGT	3.4162	1.03816	0.281085	3.69339	0.000221281	0.00365947
ESD	3.41343	0.97953	0.265247	3.6929	0.000221713	0.00366131
NPNT	11.4314	-0.806366	0.218405	-3.69207	0.000222438	0.00366798
MBNL2	3.08208	-0.944874	0.25607	-3.68991	0.000224337	0.00369396
SIK1	4.70362	0.937348	0.254102	3.68886	0.000225262	0.00370384
TSPAN33	5.22439	0.939211	0.254722	3.6872	0.000226738	0.00372275
RAPH1	2.80038	-1.06762	0.289971	-3.68183	0.000231565	0.00379654
TPPP3	6.50901	1.2227	0.332325	3.67922	0.000233944	0.00383003
COX4I1	3.98766	1.04924	0.285404	3.67632	0.00023662	0.0038683
FURIN	5.42046	0.819739	0.223305	3.67095	0.000241653	0.00393928
NOP58	3.69335	0.912976	0.248683	3.67124	0.000241374	0.00393928
TTC3	6.05554	0.879602	0.239728	3.66916	0.000243346	0.00395558
AGBL1	1.83879	-1.5088	0.411186	-3.66939	0.000243132	0.00395558
SCLT1	2.04557	-1.32296	0.361315	-3.66151	0.000250734	0.00406989
FOXD4L1	2.79062	-1.63074	0.445478	-3.66064	0.000251582	0.00407784
RABAC1	4.20025	0.93754	0.256556	3.65433	0.000257857	0.00417363
MTRNR2L4	3.04629	-1.25403	0.34337	-3.65212	0.000260081	0.00420365
MORF4L1	10.8535	0.751956	0.206052	3.64936	0.000262897	0.00424317
NDUFB1	3.84781	1.61696	0.443493	3.64597	0.000266389	0.00429346
NDUFA4	4.26434	0.935542	0.256699	3.64451	0.000267907	0.00430575
GDI2	3.66821	0.988113	0.271108	3.64472	0.000267685	0.00430575
MRPL28	5.49317	0.870817	0.238978	3.64392	0.000268517	0.00430949
HSPB2	3.1652	-1.14275	0.313819	-3.64143	0.00027113	0.00434531
C11orf58	3.73746	1.06407	0.292757	3.63465	0.000278357	0.00445488
SHD	7.42868	0.803922	0.221304	3.63267	0.000280509	0.00448303
NKG7	2.24283	-1.3534	0.372615	-3.63217	0.000281053	0.00448545
PTPN21	3.39984	-1.05524	0.290583	-3.63146	0.000281819	0.00449139
ANXA6	12.0782	0.630515	0.173669	3.63056	0.000282804	0.00450081
SERF2	5.62199	1.03065	0.284213	3.62633	0.000287475	0.00456876
RBM3	4.4968	0.892117	0.246383	3.62086	0.000293627	0.00466005
RPL26L1	9.23711	0.730821	0.201992	3.61806	0.000296818	0.00470416
ZMIZ2	4.59913	0.928794	0.256936	3.61489	0.000300476	0.00475552
SARAF	3.50496	0.911318	0.252213	3.61328	0.000302346	0.00477849
CITED2	3.43344	1.02103	0.282615	3.61278	0.000302937	0.00478121
SYNE1	2.27318	-1.13946	0.315455	-3.61211	0.00030371	0.00478679
GJA5	2.46579	-1.34602	0.372701	-3.61153	0.0003044	0.00479104
RPL27	13.3944	0.712543	0.197383	3.60996	0.000306244	0.00481343
RPL24	11.0572	0.774005	0.214784	3.60364	0.000313793	0.00490505
ANKRD1	5.48271	-1.00126	0.277763	-3.60471	0.000312507	0.00490505
HMG20B	4.0533	0.912248	0.253134	3.60381	0.000313586	0.00490505
NDUFB4	2.89608	1.03595	0.287465	3.60375	0.000313657	0.00490505
PARP10	1.94096	-1.37365	0.381312	-3.60243	0.000315257	0.0049212
UBA1	8.13538	0.653171	0.18145	3.59972	0.000318555	0.00495911
CCNY	5.16309	0.907776	0.252164	3.59995	0.000318284	0.00495911
KIF5B	7.0664	0.806619	0.224219	3.59747	0.000321332	0.00499554
RAN	5.56431	0.857567	0.238676	3.59302	0.000326873	0.00507476
NCKAP1	3.92643	0.879514	0.245169	3.58738	0.000334019	0.00517866
MAPRE3	2.65716	-1.00378	0.280251	-3.58171	0.000341359	0.00528528
AVPR1B	4.39903	0.891318	0.249339	3.57473	0.000350587	0.00541346
FMN1	2.26176	-1.64032	0.458835	-3.57497	0.000350266	0.00541346
HOXC8	1.92311	-1.45463	0.407312	-3.57129	0.000355226	0.00547769
NHSL1	2.88063	-1.18115	0.330899	-3.5695	0.000357662	0.0055078
SEC61B	2.82993	1.00589	0.282041	3.56648	0.000361806	0.00555798
ALPG	2.9843	-1.64464	0.461147	-3.56642	0.000361895	0.00555798
GSN	5.08752	0.935162	0.262384	3.56409	0.000365114	0.00558863
TMEM47	4.58187	0.892647	0.250446	3.56422	0.000364938	0.00558863
SMARCE1	4.06699	0.829119	0.232642	3.56392	0.00036536	0.00558863
C1QTNF3	2.19485	-1.51462	0.425933	-3.55602	0.000376518	0.0057516
ACE	2.35646	-1.18915	0.334598	-3.55396	0.000379484	0.00578915
LIMCH1	2.76795	-1.15145	0.324145	-3.55227	0.000381926	0.00581864
IGFBP6	2.45027	1.40318	0.39614	3.54214	0.000396893	0.00603859
TCEAL4	3.11673	0.964844	0.272427	3.54166	0.000397621	0.00604161
FAM155B	2.75075	-1.02377	0.289157	-3.54052	0.00039934	0.00605966
SRSF2	6.58335	0.726594	0.205415	3.5372	0.000404393	0.00611741
WDR46	3.02064	0.988251	0.279395	3.53711	0.000404524	0.00611741
FAP	1.99834	-1.37796	0.389589	-3.53696	0.000404753	0.00611741
NEDD8	5.00493	0.815714	0.230803	3.53425	0.000408941	0.00617251
SSBP4	3.84794	0.996343	0.281974	3.53346	0.000410155	0.00617451
ABCC9	2.42051	-1.2248	0.34662	-3.53356	0.000410005	0.00617451
H2BS1	3.24476	1.1068	0.31347	3.5308	0.000414307	0.00622879
CLDN5	2.88591	1.03444	0.293203	3.52808	0.000418587	0.00628486
TBCA	4.82168	0.99117	0.281336	3.52309	0.000426553	0.00639605
ATP5PD	3.72554	0.956025	0.271659	3.51921	0.000432827	0.00647312
ATP5ME	3.34654	1.06481	0.302566	3.51926	0.000432758	0.00647312
AMPD1	2.42087	-1.18489	0.336877	-3.51727	0.000436009	0.00651218
TUBB2A	5.52849	0.788374	0.224283	3.51509	0.000439607	0.00655733
NPTN	5.45547	0.895666	0.254995	3.51249	0.000443936	0.00661326
GALNT7	3.12295	0.980416	0.279264	3.51071	0.00044691	0.00664887
GAMT	2.81613	-1.56974	0.448004	-3.50385	0.000458587	0.00681373
SHROOM3	3.26482	-1.29092	0.368489	-3.50327	0.000459584	0.00681965
TFRC	3.07503	-0.908066	0.2594	-3.50064	0.000464147	0.0068695
TMEM258	3.37545	1.05699	0.301929	3.5008	0.000463855	0.0068695
NTN1	2.27481	-1.25048	0.357435	-3.4985	0.000467887	0.00691588
PARP9	2.88022	-1.0599	0.303015	-3.49784	0.000469049	0.00692409
GPR37	2.4135	-1.40977	0.403139	-3.49698	0.000470549	0.00693725
MCOLN1	2.24152	-1.30574	0.373436	-3.49655	0.000471318	0.00693962
CAP1	2.28239	1.19674	0.342651	3.4926	0.000478347	0.00703405
VASH2	6.89345	0.740849	0.212195	3.49136	0.00048057	0.00705763
HYOU1	3.36534	1.03978	0.297939	3.4899	0.000483202	0.00708718
ASB2	2.2259	-1.19506	0.342535	-3.48888	0.000485046	0.00710509
MBD5	2.28272	-1.12477	0.322524	-3.48739	0.000487763	0.00713572
NPEPPS	5.43889	0.780685	0.223943	3.48609	0.000490142	0.00716135
RILPL1	2.1173	-1.21908	0.349817	-3.4849	0.000492322	0.007184
FABP1	30.3835	0.697167	0.200169	3.48289	0.000496034	0.00722892
HACD1	3.07241	-1.03352	0.297046	-3.47931	0.000502708	0.00731684
SRSF1	13.7252	0.554971	0.159712	3.47482	0.000511198	0.00742148
GOLGA8S	4.77066	0.897527	0.258287	3.47492	0.000511	0.00742148
TRAPPC2	2.35796	-1.53345	0.442093	-3.46861	0.000523162	0.00758551
PARK7	4.97035	0.883445	0.255008	3.46438	0.000531463	0.0076886
WDR1	4.48886	0.779871	0.225117	3.4643	0.000531619	0.0076886
HIF3A	2.48277	-1.12352	0.324453	-3.4628	0.000534578	0.00771185
MMP24OS	3.10041	0.933334	0.269508	3.46311	0.000533971	0.00771185
ZFP37	19.4392	-0.597552	0.172651	-3.46103	0.000538111	0.00775301
TACR2	1.79539	-1.46406	0.423281	-3.45884	0.000542516	0.00780662
SPCS3	3.67276	0.830684	0.240572	3.45296	0.000554476	0.00796867
C9orf43	3.14453	-0.985139	0.285361	-3.45225	0.000555923	0.00797942
ACTA2	31.2927	-0.709505	0.205552	-3.45171	0.00055705	0.00798555
CAPN3	1.87977	-1.39402	0.403941	-3.45106	0.000558393	0.00799476
APCS	2.53264	-1.55774	0.451665	-3.44888	0.000562909	0.00804932
TCAP	4.30991	-1.04686	0.303687	-3.44717	0.000566486	0.00809033
SPG21	3.19278	1.05932	0.307667	3.44308	0.000575127	0.00820347
SLC18A1	2.15082	-1.2877	0.374093	-3.4422	0.000576994	0.00821982
NAV3	3.21941	-1.12652	0.32734	-3.44145	0.000578602	0.00823246
H2AC16	2.29246	-1.51758	0.441239	-3.43935	0.000583104	0.00828618
SEPTIN2	8.22225	0.867284	0.252335	3.43703	0.000588127	0.00834716
OXLD1	4.1433	-0.905959	0.263782	-3.43449	0.000593667	0.00841533
PRDX2	6.41158	0.785669	0.228884	3.43261	0.000597794	0.00846331
EMP2	3.54101	-1.01513	0.295834	-3.43143	0.000600401	0.00848968
AP2S1	3.56328	0.892137	0.260037	3.43081	0.000601787	0.00849875
TXNIP	5.24504	0.955051	0.27863	3.42766	0.0006088	0.00858717
PRDM13	3.67224	0.939066	0.274191	3.42486	0.000615117	0.00866555
PMPCA	3.12056	0.959039	0.280155	3.42325	0.000618776	0.00870636
PABPC4	6.77072	0.681413	0.199329	3.41853	0.000629592	0.00883675
CDC25B	5.30189	0.905981	0.265	3.41879	0.000629003	0.00883675
S100A4	3.49	1.05496	0.308678	3.41768	0.000631583	0.00884294
RSAD2	1.75657	-1.34175	0.39257	-3.41787	0.000631134	0.00884294
MYOM3	7.36329	-0.758152	0.221994	-3.41518	0.000637395	0.00891079
SUMO4	5.97231	0.744757	0.21811	3.41459	0.000638772	0.00891079
LMAN2	3.31913	0.900015	0.263574	3.41466	0.000638624	0.00891079
EIF1	6.952	0.800265	0.234464	3.41317	0.000642119	0.00894654
SENP7	2.35087	-1.05205	0.308327	-3.41213	0.000644572	0.00896977
UBA52	8.07074	0.977721	0.28661	3.41133	0.00064647	0.00898522
TIPIN	8.08849	0.688418	0.20198	3.40835	0.000653574	0.00907292
ACTR2	4.71489	0.805434	0.237148	3.39634	0.000682935	0.00946897
HIGD2A	2.81316	1.00313	0.29546	3.39515	0.000685909	0.00949868
RER1	4.90715	1.29202	0.380588	3.39481	0.000686766	0.00949901
EWSR1	8.53246	0.66102	0.194767	3.39391	0.000689027	0.00951876
RETN	2.09317	-1.11888	0.329708	-3.39353	0.000689969	0.00952023
SSR3	3.61943	0.955609	0.281721	3.39204	0.000693755	0.00956091
RAB5C	3.95432	0.868523	0.256228	3.38965	0.000699827	0.00963296
DNAJA1	5.79148	0.872263	0.25743	3.38835	0.000703141	0.00966692
VPS37D	3.0152	-1.71369	0.505852	-3.38772	0.000704752	0.00967741
LILRB5	2.33849	-1.80446	0.533129	-3.38465	0.000712681	0.00977453
PIGP	2.33127	-1.31775	0.389697	-3.38147	0.000721002	0.00987677
IGSF21	4.54439	-0.810991	0.239943	-3.37993	0.000725038	0.00992015
ZNF768	8.23804	0.623867	0.18469	3.37791	0.000730393	0.00998145
HEXIM1	3.32729	0.9135	0.270475	3.3774	0.000731755	0.00998811
PABIR1	2.45564	-1.1084	0.328333	-3.37584	0.000735905	0.0100328
JAK2	2.07901	-1.47996	0.438505	-3.375	0.000738151	0.0100514
KCNH3	14.3178	0.530445	0.157242	3.37343	0.000742377	0.0100969
SNX18	4.13613	-0.931457	0.276149	-3.37302	0.00074348	0.0100998
ATP6AP2	4.18303	0.783181	0.232259	3.37202	0.000746188	0.0101246
SSU72	3.40213	0.932819	0.276685	3.37141	0.00074784	0.0101349
NEBL	6.85501	-0.823667	0.244381	-3.37043	0.000750515	0.0101591
FXYD6	3.48143	0.870385	0.258506	3.36698	0.000759961	0.0102748
EPB41L3	5.22572	-0.946842	0.281458	-3.36406	0.000768038	0.0103717
ARHGAP23	7.46757	-0.681515	0.202916	-3.3586	0.000783375	0.0105663
CLTC	4.95538	0.812193	0.241911	3.35741	0.000786775	0.0105871
TACC1	5.35656	0.702112	0.209109	3.35764	0.000786108	0.0105871
WDR59	2.25746	-1.22801	0.366017	-3.35505	0.000793501	0.0106651
TACC2	6.02748	0.764214	0.228117	3.3501	0.000807818	0.0108447
APOE	2.1117	1.22993	0.367357	3.34806	0.000813796	0.0109121
ARL6IP1	3.78451	0.893221	0.266954	3.34597	0.000819951	0.0109818
MTCH1	4.64689	0.803012	0.240066	3.34497	0.000822921	0.0110086
USP17L3	2.41487	-1.66753	0.49858	-3.34455	0.000824154	0.0110122
PGAM4	3.13615	0.954951	0.285658	3.34298	0.000828824	0.0110617
MTO1	1.99853	-1.09641	0.328015	-3.34256	0.000830102	0.0110658
IPO5	3.89687	0.822035	0.246127	3.33989	0.000838128	0.0111208
ADAMTS1	4.78967	1.02512	0.306902	3.34023	0.000837093	0.0111208
SELENBP1	2.71168	1.56933	0.469852	3.34005	0.000837641	0.0111208
FGL2	1.89652	-1.43986	0.431061	-3.34028	0.000836949	0.0111208
USP6	2.35989	-1.43494	0.429851	-3.33821	0.000843193	0.0111682
LSM11	1.81487	-1.38244	0.414145	-3.33806	0.000843659	0.0111682
DOCK9	3.78482	0.938612	0.281272	3.33703	0.000846803	0.0111839
KCNA1	1.74139	-1.30378	0.390674	-3.33725	0.000846104	0.0111839
AP3D1	5.26075	0.694613	0.208409	3.33293	0.00085936	0.0113366
ENGASE	5.04177	-0.778888	0.23378	-3.33171	0.000863135	0.0113732
KIF24	3.66669	-0.965757	0.289975	-3.33048	0.000866972	0.0114106
NME1	3.1877	0.970899	0.291559	3.33003	0.000868376	0.0114109
NR1D2	2.35876	-1.18604	0.356186	-3.32983	0.000868992	0.0114109
IGF2BP1	3.57695	0.896389	0.269405	3.32729	0.000876964	0.0115023
CD81	8.79552	1.04395	0.314035	3.32432	0.000886338	0.0115589
GPX4	2.80445	1.01638	0.305724	3.3245	0.000885766	0.0115589
TAX1BP1	2.93942	0.978926	0.294448	3.32461	0.000885412	0.0115589
POR	2.89702	1.00562	0.302468	3.32473	0.000885048	0.0115589
ITPRIPL1	2.37231	-1.491	0.448501	-3.32441	0.000886064	0.0115589
NECAB2	5.35255	-0.723645	0.217726	-3.32364	0.0008885	0.0115606
MBD3	4.41785	0.773218	0.232638	3.32369	0.000888344	0.0115606
MYOM1	6.05797	-0.834596	0.251341	-3.32058	0.000898322	0.0116751
MAGED2	11.2136	0.694162	0.209111	3.31958	0.000901515	0.0117033
TEX19	1.85618	-1.37091	0.413198	-3.3178	0.000907305	0.0117651
LRRC17	4.32649	1.11182	0.33543	3.3146	0.00091775	0.0118735
TOX2	1.65106	-1.2877	0.388457	-3.31491	0.00091672	0.0118735
NDUFS5	4.5891	0.739581	0.2234	3.31057	0.000931064	0.0120321
CST11	1.72504	-1.50421	0.454632	-3.30864	0.000937488	0.0121014
BAD	1.93314	-1.56899	0.475152	-3.30208	0.000959698	0.0123741
RDH13	19.4689	0.443198	0.1343	3.30005	0.000966673	0.01245
NRSN2	2.88231	0.987211	0.299237	3.2991	0.000969961	0.0124755
TMEM123	2.52888	1.05044	0.318426	3.29884	0.000970842	0.0124755
ZSCAN25	3.94966	-0.902222	0.273557	-3.29812	0.000973346	0.0124936
AK8	47.5629	-0.942656	0.285948	-3.2966	0.000978612	0.0125342
EFR3B	5.39273	0.721949	0.218999	3.29658	0.000978699	0.0125342
BRD1	2.39598	-1.29437	0.392729	-3.29584	0.000981276	0.0125531
CSRP3	3.52696	-0.93906	0.28509	-3.2939	0.000988064	0.0126258
STK24	2.88951	0.96912	0.294705	3.28844	0.00100745	0.0128591
UBE2V1	4.74617	0.777645	0.236775	3.28432	0.00102228	0.0130338
OR2K2	1.79343	-1.31669	0.400971	-3.28376	0.00102432	0.0130452
ARL2	12.4225	0.537308	0.163718	3.28191	0.00103106	0.0131165
TRPM3	2.02014	-1.11175	0.338851	-3.28095	0.00103457	0.0131464
MC5R	1.93273	-1.51489	0.462217	-3.27743	0.00104756	0.0132967
MXD4	5.17948	0.711001	0.216979	3.27682	0.00104984	0.0132988
CATSPER2	2.02379	-1.43747	0.438687	-3.27676	0.00105006	0.0132988
RCN3	1.86767	1.1667	0.356131	3.27605	0.00105271	0.0133175
LGALS3	2.26159	1.08017	0.329814	3.27508	0.00105632	0.0133337
TLE7	2.33098	-1.71071	0.522322	-3.27521	0.00105585	0.0133337
TNFAIP6	2.06251	-1.19014	0.363604	-3.27318	0.00106346	0.013409
GRIN2A	6.92906	-0.76018	0.232423	-3.27067	0.00107293	0.0135109
LDB1	3.93696	0.882305	0.269797	3.27025	0.00107451	0.0135109
RBMXL3	1.66699	-1.51053	0.461967	-3.26979	0.00107628	0.0135109
ZSCAN12	1.98028	-1.1213	0.342916	-3.26989	0.00107588	0.0135109
PRKAR1A	6.25756	0.679499	0.208094	3.26534	0.00109331	0.0137097
IFI44	1.85072	-1.21245	0.372352	-3.25618	0.00112921	0.0141443
CELSR1	2.40787	-1.16898	0.359701	-3.24986	0.00115463	0.0144469
C4orf3	5.55508	0.747941	0.230249	3.2484	0.00116055	0.0144971
BAX	2.96614	0.933131	0.287272	3.24824	0.00116119	0.0144971
STAC3	13.8897	0.670182	0.206467	3.24595	0.00117058	0.0145984
ACTN4	11.9318	0.488939	0.150782	3.24269	0.00118407	0.0147045
BEX4	2.96621	0.898614	0.277124	3.24265	0.00118425	0.0147045
RBSN	2.80055	-1.59115	0.490671	-3.24281	0.00118356	0.0147045
MAMLD1	2.51051	-1.07089	0.330162	-3.24351	0.00118065	0.0147045
STK25	12.9457	0.644525	0.198883	3.24073	0.00119226	0.0147879
TRIM28	9.96786	0.624658	0.192902	3.23821	0.00120283	0.0149029
PRDX4	2.99613	0.890641	0.275164	3.23677	0.00120892	0.0149458
ZC3H10	2.18769	-1.43816	0.444317	-3.23679	0.00120883	0.0149458
CLPTM1L	4.14384	0.805349	0.24901	3.2342	0.00121984	0.0150645
TMEM121	2.11892	-1.67798	0.519061	-3.23273	0.00122614	0.0151259
MATR3	6.00815	0.709651	0.219683	3.23035	0.00123639	0.0151915
PSMC3	4.61186	0.865243	0.267889	3.22986	0.00123853	0.0151915
HDAC2	4.0148	0.792669	0.24536	3.23064	0.00123513	0.0151915
ADRM1	3.66385	0.851593	0.2636	3.23063	0.00123518	0.0151915
CHST1	2.89045	-1.00012	0.309627	-3.23007	0.00123758	0.0151915
FHOD3	3.02493	-1.064	0.329448	-3.22964	0.00123944	0.0151915
IPO4	3.38622	0.889848	0.275596	3.22881	0.00124306	0.0152099
MOSMO	2.20336	-1.07155	0.331885	-3.22869	0.00124361	0.0152099
SNRPD2	3.98221	0.85949	0.266666	3.2231	0.00126813	0.0154932
NAPEPLD	1.89632	-1.39811	0.433886	-3.2223	0.00127164	0.0155195
ARRB2	8.29796	0.589934	0.183128	3.22143	0.00127551	0.01555
PSMA7	3.7673	0.876207	0.272497	3.21547	0.0013023	0.0158597
AGPAT1	4.82211	0.722674	0.224863	3.21384	0.00130972	0.0159331
SYNPO2	1.92069	-1.18388	0.368523	-3.21251	0.00131579	0.0159899
ACAA2	3.44924	0.827147	0.257517	3.21202	0.00131807	0.0160006
YWHAG	5.24004	0.72935	0.227106	3.21149	0.00132048	0.0160127
BEGAIN	2.47434	-1.33304	0.415237	-3.21031	0.00132592	0.0160616
PDE2A	2.26032	-1.22085	0.380518	-3.20839	0.00133481	0.0161521
SUB1	3.88815	0.848728	0.264703	3.20634	0.00134434	0.0162503
CLEC3B	2.7772	-1.05916	0.33042	-3.20551	0.00134825	0.0162803
CAPG	2.86026	1.00578	0.313827	3.2049	0.00135111	0.0162975
PAX6	2.01982	-1.108	0.345771	-3.20445	0.00135321	0.0163057
DCN	7.74576	-0.796417	0.248576	-3.20392	0.00135569	0.0163184
ATP1A2	6.02227	-0.773336	0.24143	-3.20315	0.00135934	0.0163451
FAM131C	2.36694	-1.25772	0.392862	-3.20142	0.00136751	0.016426
GPRC5B	6.23106	-0.694489	0.217026	-3.20003	0.00137415	0.0164883
EIF3H	2.8484	1.01329	0.316763	3.19888	0.00137964	0.0165195
ZSWIM1	1.95303	-1.16588	0.364451	-3.19901	0.001379	0.0165195
LRP5	5.58826	0.671935	0.210126	3.19777	0.00138494	0.0165656
ATP9A	2.47673	-1.02757	0.321422	-3.19696	0.00138883	0.0165792
MAP3K1	1.84353	-1.20201	0.375989	-3.19693	0.00138898	0.0165792
NONO	9.96281	0.543131	0.169963	3.19558	0.0013955	0.0166339
IFIT1	2.27609	-1.06832	0.334333	-3.19538	0.00139648	0.0166339
CHML	2.8376	-1.00089	0.313741	-3.19018	0.00142182	0.016918
HSPG2	8.26413	0.581634	0.182471	3.18755	0.00143484	0.0170551
LY6H	2.14327	-1.33663	0.420007	-3.1824	0.00146062	0.0173435
PARP3	2.10935	-1.07251	0.33715	-3.18111	0.00146713	0.0174027
YES1	3.9311	0.823587	0.259232	3.17703	0.00148793	0.0176311
FUT7	1.67515	-1.39145	0.438112	-3.17602	0.00149313	0.0176743
PRR23A	1.90197	-1.26433	0.398304	-3.17427	0.00150212	0.0177624
E2F8	3.14126	-0.973326	0.306662	-3.17394	0.00150387	0.0177646
TMEM94	4.26239	-0.768621	0.242217	-3.17328	0.00150728	0.0177865
FAM135A	2.794	-1.14065	0.359519	-3.17272	0.00151019	0.0178025
KLHL40	4.74813	-0.725779	0.229029	-3.16894	0.00152997	0.018017
CALCRL	2.64611	-1.47844	0.466713	-3.16778	0.0015361	0.0180705
SRGAP2B	7.91703	-0.614188	0.194155	-3.16338	0.00155947	0.0183266
EIF2S2	3.64093	0.818801	0.259012	3.16125	0.00157094	0.0184307
SUMO3	2.37015	1.12836	0.356947	3.16113	0.00157156	0.0184307
TRPC6	2.08358	-1.23068	0.389581	-3.15899	0.00158317	0.0185478
DERL1	2.75361	-1.27856	0.404919	-3.15757	0.0015909	0.0186192
PFKP	2.83342	0.957705	0.303343	3.15717	0.00159307	0.0186255
TXN2	5.00993	0.701952	0.222565	3.15392	0.00161096	0.0187961
COX17	3.10442	-1.3193	0.418275	-3.15414	0.00160974	0.0187961
HIVEP2	3.86757	-0.760174	0.241108	-3.15284	0.00161693	0.0188465
TNIK	7.13191	-0.734503	0.232989	-3.15253	0.00161865	0.0188473
ZNF594	3.43937	-1.11434	0.353566	-3.15173	0.00162307	0.0188796
SEM1	3.64611	0.929947	0.295112	3.15117	0.00162618	0.0188965
YWHAZ	11.6647	0.623515	0.197908	3.15053	0.00162974	0.0188993
DPYSL5	2.13971	-1.14107	0.362177	-3.15058	0.00162946	0.0188993
BECN1	2.92864	0.929249	0.295183	3.14805	0.00164363	0.0190411
KHDRBS1	4.80871	0.799582	0.254134	3.14631	0.00165347	0.0191357
CDH1	2.14915	-1.20326	0.382555	-3.14533	0.001659	0.0191801
HELZ2	2.51177	-1.31575	0.418527	-3.14376	0.00166794	0.019264
OAZ2	4.1527	0.828318	0.263521	3.14327	0.00167072	0.0192766
THAP9	2.49378	-1.46707	0.467013	-3.1414	0.00168142	0.0193805
MFAP4	4.3908	0.924836	0.294595	3.13935	0.00169324	0.0194577
MEF2A	3.97545	0.785834	0.250287	3.13974	0.00169098	0.0194577
VSTM2B	1.71489	-1.2637	0.402516	-3.1395	0.00169238	0.0194577
FAM131B	1.79776	-1.3328	0.424639	-3.13867	0.00169714	0.019483
SNRPN	4.65169	0.730803	0.232978	3.13679	0.00170809	0.0195757
APEX1	3.45258	0.828238	0.264048	3.13669	0.00170865	0.0195757
HM13	4.30404	0.731335	0.233291	3.13486	0.00171937	0.019671
PHKG1	1.70467	-1.28987	0.411485	-3.13468	0.00172042	0.019671
STMP1	2.90717	0.907541	0.289564	3.13417	0.00172342	0.0196857
CDV3	5.88479	0.671012	0.214322	3.13086	0.00174296	0.0198889
ITGAL	2.00052	-1.40824	0.449945	-3.12982	0.00174916	0.0199397
TMEM68	2.49451	-1.30847	0.418229	-3.12859	0.00175645	0.0200028
CAPN6	4.19196	-1.01205	0.323562	-3.12784	0.00176095	0.020034
ANHX	1.51682	-1.3353	0.427481	-3.12365	0.0017862	0.0203011
ARAP3	2.3045	-1.0781	0.345753	-3.11813	0.00182005	0.0206652
OR52D1	1.61268	-1.24478	0.399808	-3.11345	0.00184912	0.0209745
SOD1	4.45195	0.778684	0.250193	3.11233	0.00185618	0.0209793
DDX3Y	3.85057	0.793865	0.25508	3.11221	0.0018569	0.0209793
BPNT2	3.20779	0.908961	0.292037	3.11249	0.00185519	0.0209793
GPBP1L1	3.58869	1.08915	0.349912	3.11264	0.00185422	0.0209793
EIF2AK2	2.34797	-0.999417	0.321183	-3.11167	0.00186031	0.020997
CMTM3	2.89531	0.978403	0.314501	3.11097	0.00186474	0.0210262
BEAN1	1.72385	-1.29524	0.416451	-3.11019	0.00186966	0.0210608
DMWD	5.54403	0.689922	0.222042	3.10717	0.00188886	0.0212562
SSR1	4.13061	0.720126	0.231959	3.10454	0.00190577	0.0214253
B3GAT3	5.48423	0.797931	0.257187	3.10253	0.00191871	0.0215496
RGMB	5.39635	0.653781	0.210859	3.10056	0.00193157	0.0216727
ITPK1	2.51148	1.06586	0.344003	3.0984	0.00194571	0.0218099
EIF4A1	11.5549	0.569595	0.1839	3.0973	0.00195291	0.0218692
CBX3	4.39627	0.85021	0.274761	3.09437	0.00197234	0.0220651
TSC22D1	6.0201	0.609806	0.197363	3.08976	0.00200317	0.0223881
NFAM1	17.0321	0.514664	0.166612	3.08899	0.00200841	0.0224246
PEBP1	3.49142	0.895043	0.289841	3.08805	0.00201476	0.0224736
ATP6V0D1	3.17418	0.817546	0.2648	3.0874	0.00201914	0.0225004
CHD7	3.87664	0.757467	0.24539	3.08679	0.00202329	0.0225246
SSR4	3.18107	1.1432	0.370474	3.08579	0.00203013	0.0225788
TTC4	2.7554	-0.962115	0.311915	-3.08454	0.00203867	0.0226517
SUPT5H	5.24912	0.633445	0.205511	3.08229	0.00205416	0.0228016
GPD2	2.15257	-1.05953	0.343782	-3.08198	0.00205629	0.0228031
DDX4	2.79197	-0.92498	0.300244	-3.08076	0.00206473	0.0228744
KRTCAP2	2.98562	1.08535	0.352342	3.0804	0.00206721	0.0228796
LAMB1	4.26269	0.76911	0.249747	3.07955	0.00207313	0.0229229
LUC7L2	4.12671	0.802743	0.260801	3.07799	0.00208404	0.0230213
LIMK1	2.67533	1.01744	0.330637	3.07723	0.00208936	0.0230577
BHMT	1.96983	-1.19937	0.389876	-3.07628	0.00209602	0.0231089
DIO1	3.71328	-0.821393	0.267111	-3.0751	0.0021043	0.0231778
ID4	2.39638	-1.03721	0.337325	-3.0748	0.00210644	0.023179
RHBDD2	3.01953	0.909667	0.295971	3.0735	0.00211565	0.0232355
ADTRP	1.82974	-1.28026	0.416517	-3.07372	0.00211406	0.0232355
MIDEAS	6.58071	0.747842	0.243417	3.07227	0.00212436	0.0233088
PITRM1	3.21397	0.822633	0.267956	3.07003	0.00214034	0.0234615
GABRB1	2.13034	-1.39379	0.454484	-3.06676	0.00216394	0.0236974
EFEMP2	4.01538	0.923467	0.30115	3.06647	0.00216602	0.0236974
OR10G9	2.06106	-1.45945	0.475982	-3.06618	0.0021681	0.0236975
SPRED2	2.27723	-0.952803	0.310808	-3.06557	0.00217254	0.0237233
DUSP13	2.03474	-1.07713	0.351536	-3.06406	0.00218355	0.0238207
BUB1	2.12494	-1.21258	0.396051	-3.06167	0.00220103	0.0239885
TUBB6	12.3568	0.701269	0.229327	3.05795	0.00222856	0.0242554
KRTAP10-4	1.79569	-1.21289	0.396656	-3.05779	0.00222977	0.0242554
HS6ST1	2.74423	0.883111	0.288893	3.05688	0.00223656	0.0243061
SHISAL1	2.45489	-0.960948	0.314423	-3.05622	0.00224144	0.0243359
KLK2	1.70297	-1.47025	0.481506	-3.05345	0.0022623	0.0245391
FAM83E	6.06015	-0.935612	0.306496	-3.05261	0.00226859	0.0245839
SRP9	4.26306	0.844455	0.277131	3.04714	0.00231032	0.0250124
CFH	2.99907	0.82686	0.271409	3.04655	0.00231487	0.0250379
MAGEB2	1.64815	-1.37422	0.451349	-3.04469	0.00232918	0.0251688
HNRNPUL1	6.26432	0.650389	0.213701	3.04345	0.0023388	0.0252087
DDIT4	2.45088	0.921187	0.302687	3.04336	0.0023395	0.0252087
KCNA6	1.49881	-1.40265	0.460808	-3.0439	0.00233534	0.0252087
MRPL37	2.31333	0.960266	0.315669	3.042	0.00235011	0.0252992
NET1	3.33437	0.89441	0.294247	3.03966	0.00236845	0.0254725
ROCK2	2.99315	-0.89861	0.295706	-3.03886	0.00237477	0.0254924
C16orf82	3.01995	-1.18673	0.390501	-3.03899	0.00237371	0.0254924
HES3	1.69222	-1.26851	0.417835	-3.03592	0.00239803	0.025718
BABAM1	2.08984	1.05369	0.347123	3.0355	0.00240138	0.0257297
GJA1	2.34974	1.12162	0.369566	3.03497	0.00240562	0.025751
EDF1	7.10022	0.781126	0.257445	3.03414	0.00241222	0.0257974
NAA35	1.87616	-1.2636	0.416526	-3.03367	0.00241597	0.0258133
RPL10L	7.48257	0.810196	0.267167	3.03255	0.002425	0.0258568
ERBB2	5.97784	-0.700043	0.230825	-3.03279	0.00242302	0.0258568
SMARCAD1	3.0596	-0.821921	0.271073	-3.0321	0.00242858	0.0258568
YWHAH	3.13745	0.866789	0.285877	3.03204	0.0024291	0.0258568
NR2F6	2.59878	0.89372	0.294898	3.03061	0.00244061	0.0259551
CFAP298	3.24341	0.922154	0.304581	3.02762	0.00246491	0.0261891
SYT10	2.01828	-1.33873	0.442268	-3.02696	0.00247028	0.0262218
DELE1	5.19596	-0.6877	0.227566	-3.02198	0.00251129	0.0266323
TRDC	1.88011	-1.33718	0.442556	-3.02149	0.00251531	0.0266502
MRFAP1L1	2.69231	0.988884	0.327349	3.02089	0.00252036	0.0266546
OSTN	1.84506	-1.41444	0.468222	-3.02088	0.0025204	0.0266546
MEF2C	7.496	-0.697208	0.230895	-3.01959	0.00253113	0.0267433
HSPB6	2.26251	-1.09762	0.363553	-3.01915	0.00253485	0.0267578
FBLL1	2.25565	-0.958776	0.317646	-3.01838	0.00254132	0.0268013
PDLIM7	15.6687	0.670819	0.222268	3.01807	0.00254392	0.0268039
CNP	3.0962	0.813151	0.269779	3.01414	0.00257712	0.027125
SPPL2C	1.90586	-1.26024	0.418142	-3.0139	0.00257914	0.027125
MYO9B	2.47142	0.971962	0.322566	3.01322	0.00258489	0.0271604
PLEKHJ1	3.67571	0.752165	0.249705	3.01221	0.00259351	0.0272259
RAB6A	2.61902	0.937462	0.311503	3.00948	0.00261698	0.027447
RRAGC	2.17587	-1.36825	0.454783	-3.00858	0.00262476	0.0275033
F8A1	2.66264	0.858457	0.285471	3.00716	0.00263699	0.0276062
ABCA13	1.80734	-1.24694	0.414711	-3.00676	0.00264048	0.0276173
TEX101	1.94236	-1.08409	0.360593	-3.00641	0.00264353	0.0276239
NFKB2	4.70156	-0.803783	0.26748	-3.00502	0.00265564	0.027725
CLTA	4.38662	0.792548	0.263843	3.00387	0.00266572	0.0278049
CRTAP	2.4502	0.927342	0.308894	3.00214	0.0026809	0.0279376
YWHAQ	4.05123	0.801133	0.26693	3.00129	0.00268837	0.0279899
FBXO32	2.84317	0.931004	0.31029	3.00043	0.00269596	0.0280179
SLC35E1	3.11662	0.892383	0.297398	3.00064	0.00269417	0.0280179
SYNCRIP	7.8222	0.515013	0.171705	2.9994	0.00270511	0.0280874
OST4	4.07495	0.883762	0.294879	2.99704	0.00272617	0.0282803
TLN1	5.67154	0.702628	0.234699	2.99374	0.00275576	0.0284766
ZC3H4	3.11503	0.849043	0.283529	2.99455	0.0027485	0.0284766
TRAM1	3.13005	0.809494	0.270413	2.99355	0.00275757	0.0284766
GNG14	2.97846	0.846064	0.282585	2.99402	0.00275331	0.0284766
TFPI	2.44709	0.96076	0.320918	2.99378	0.00275543	0.0284766
NDUFB6	3.5615	0.809808	0.270546	2.99323	0.0027604	0.02848
DYNLT5	1.82416	-1.19602	0.399907	-2.99074	0.00278304	0.0286877
NTRK3	1.8242	-1.42882	0.477795	-2.99044	0.00278579	0.0286901
RNF187	4.12173	0.828115	0.277017	2.9894	0.00279529	0.028762
RBP1	4.37043	0.813385	0.272311	2.98697	0.00281757	0.028939
C6orf132	1.84071	-1.28896	0.431526	-2.98698	0.00281751	0.028939
RNH1	4.4473	0.900177	0.301483	2.98583	0.00282807	0.0290207
MRGPRX1	1.81635	-1.09679	0.367579	-2.98381	0.0028468	0.0291867
MSI2	3.90699	-0.830473	0.278559	-2.98132	0.00287013	0.0293995
ETF1	3.6002	0.74262	0.249121	2.98097	0.00287341	0.0294067
SHC1	3.79897	0.738391	0.247872	2.97893	0.0028926	0.0295765
ITGB6	3.28175	-0.889541	0.298736	-2.97769	0.00290432	0.0296698
PTPA	2.81188	0.877812	0.294894	2.9767	0.0029137	0.029739
MPC1	2.41066	-0.970602	0.326186	-2.97561	0.00292409	0.0298184
CAVIN3	2.27151	1.01295	0.340474	2.97512	0.00292876	0.0298393
DAG1	6.79597	0.553912	0.186225	2.97442	0.0029354	0.0298709
INF2	4.23124	0.709406	0.238538	2.97397	0.00293971	0.0298709
TMEM92	2.5531	-1.41008	0.474102	-2.97421	0.00293747	0.0298709
MDH2	3.78169	0.833929	0.280543	2.97256	0.0029533	0.0299823
MEST	8.38347	0.770839	0.259438	2.97118	0.00296656	0.0300634
PTGES3	4.11421	0.732944	0.246681	2.97122	0.00296622	0.0300634
SYT4	1.84775	-1.1743	0.395448	-2.96956	0.00298229	0.030196
FITM1	5.2347	0.837626	0.282249	2.96769	0.00300049	0.0303533
PDPN	2.11954	-1.07036	0.360814	-2.96651	0.00301203	0.0304431
LAMA2	2.52094	-1.01842	0.343399	-2.9657	0.00301995	0.0304962
MMRN2	1.64328	-1.26053	0.425112	-2.96517	0.00302519	0.0305221
ZCCHC18	1.95496	-1.26683	0.427712	-2.96187	0.00305774	0.0308232
MAVS	3.98181	0.769543	0.259938	2.96049	0.00307149	0.0309337
TTC24	1.87473	-1.07766	0.364047	-2.96023	0.00307412	0.0309337
UBXN1	3.48361	0.758326	0.256209	2.95979	0.00307844	0.0309499
PRTG	2.13918	-1.13724	0.384283	-2.95939	0.00308253	0.0309637
C1orf185	1.51544	-1.26957	0.429294	-2.95733	0.00310312	0.0311431
TP53RK	4.30542	0.763881	0.258415	2.95603	0.00311629	0.0312477
ACLY	4.12666	0.715003	0.241925	2.95547	0.0031219	0.0312766
RBM8A	6.18201	0.681339	0.230775	2.9524	0.00315315	0.0315619
VCL	3.87283	0.77934	0.264075	2.95121	0.00316531	0.0316558
TMEM248	4.27268	0.720681	0.244257	2.95051	0.00317253	0.0317003
PTGDR2	1.94547	-1.05317	0.357214	-2.9483	0.0031953	0.0318999
DDX5	12.3541	0.434666	0.147622	2.94444	0.00323536	0.0321872
PTK7	5.94158	0.597187	0.202784	2.94495	0.00323012	0.0321872
BTG1	4.33244	0.71847	0.243993	2.94464	0.00323334	0.0321872
H3Y1	1.74333	-1.50635	0.51147	-2.94514	0.00322813	0.0321872
TTYH3	25.8465	0.455111	0.154658	2.9427	0.00325359	0.0323404
RASA3	6.00147	0.587525	0.199971	2.93804	0.00330291	0.0327171
PURB	5.87183	0.672677	0.228914	2.93856	0.00329744	0.0327171
ZMIZ1	3.91597	0.712548	0.242525	2.93804	0.00330296	0.0327171
SULF2	2.98288	0.849952	0.289222	2.93875	0.00329534	0.0327171
SASS6	1.71892	-1.19778	0.407731	-2.93766	0.00330696	0.0327283
HNRNPLL	3.5081	0.794345	0.270443	2.93719	0.00331196	0.0327494
SRSF8	2.7023	0.828816	0.282388	2.93503	0.00333518	0.0329504
LOXL2	3.51366	0.757575	0.258215	2.93389	0.00334741	0.033035
CEMIP	2.83691	-0.938005	0.319735	-2.9337	0.00334953	0.033035
UBXN6	3.50073	0.795269	0.271332	2.93098	0.0033789	0.0332385
GLRX3	2.40119	0.970808	0.331201	2.93118	0.00337681	0.0332385
CLCC1	2.15201	-0.93798	0.320018	-2.93103	0.00337842	0.0332385
KANK2	3.01525	0.801558	0.273514	2.93059	0.00338319	0.033252
RAB39A	8.23319	0.598585	0.204305	2.92986	0.00339116	0.0333016
GPM6B	2.7732	0.860327	0.293675	2.92952	0.00339489	0.0333097
AQP3	3.07326	0.881302	0.301143	2.92652	0.00342774	0.0336031
PGAM2	4.09253	-0.816291	0.279045	-2.92531	0.00344116	0.0337056
ESYT2	2.93959	0.867407	0.296641	2.9241	0.00345455	0.0338078
TTC31	19.3711	-0.706655	0.241808	-2.92238	0.00347364	0.0339654
QTRT1	2.62593	-1.34164	0.459331	-2.92085	0.00349077	0.0341038
SPPL2B	4.49514	0.775747	0.265625	2.92046	0.00349512	0.034117
CAMP	1.9421	-1.41923	0.486131	-2.91944	0.00350664	0.0342003
HOMER2	2.66256	-0.960392	0.329068	-2.91852	0.00351695	0.034253
VWA8	2.32893	-0.985777	0.337777	-2.91842	0.00351805	0.034253
MYOD1	10.1212	0.624165	0.214148	2.91464	0.003561	0.034627
KHSRP	4.80695	0.696475	0.238969	2.9145	0.00356254	0.034627
C1QA	2.43482	-0.986082	0.338594	-2.91228	0.00358797	0.0348445
NINJ1	2.53385	0.920519	0.31615	2.91166	0.00359518	0.0348849
RNF41	3.44714	-0.800112	0.275078	-2.90867	0.0036297	0.0351899
H4C13	4.88034	0.660369	0.227091	2.90795	0.00363806	0.0352042
CDC34	3.32642	0.760735	0.261577	2.90827	0.00363434	0.0352042
PDE1C	1.812	-1.50589	0.517888	-2.90775	0.00364043	0.0352042
NPSR1	1.95318	-1.33082	0.457908	-2.9063	0.0036573	0.0353374
HHATL	2.7368	-1.0781	0.370991	-2.90598	0.00366099	0.0353424
SLC44A4	2.0763	-1.04108	0.358306	-2.90555	0.00366604	0.0353424
LTK	2.03187	-1.06984	0.368218	-2.90546	0.00366712	0.0353424
RNF113B	2.08016	-1.19635	0.412168	-2.90257	0.00370109	0.0356398
ERH	3.71172	0.781107	0.269141	2.90223	0.00370518	0.0356491
PPP2R3B	7.65115	-0.697905	0.240562	-2.90114	0.00371807	0.035743
HDGF	4.16673	0.761443	0.26252	2.90052	0.00372546	0.0357583
PCARE	1.96469	-1.14977	0.396407	-2.90048	0.00372594	0.0357583
NECTIN2	6.10027	0.58686	0.202425	2.89914	0.00374184	0.0358808
CCT6A	6.4038	0.576777	0.199124	2.89657	0.00377264	0.0361458
H4C15	3.38809	0.756281	0.261154	2.89592	0.00378045	0.0361843
TBX6	1.77171	-1.16764	0.40323	-2.89571	0.003783	0.0361843
OBSL1	12.963	-0.597622	0.206606	-2.89257	0.00382099	0.0364595
SCRN1	4.99184	0.694418	0.240072	2.89254	0.00382137	0.0364595
AHCY	3.00015	0.890283	0.307765	2.89273	0.00381908	0.0364595
NMRK2	3.92302	-0.757708	0.262353	-2.88813	0.00387542	0.0369443
RASL10A	8.72399	0.794156	0.275053	2.88729	0.00388576	0.0370121
ENY2	2.38468	0.951428	0.329583	2.88676	0.00389229	0.0370151
DEFB119	1.70513	-1.17568	0.407268	-2.88674	0.00389257	0.0370151
RHOV	14.4369	0.792606	0.274643	2.88595	0.00390235	0.0370772
LGALS7B	2.51805	-0.93512	0.324593	-2.8809	0.00396542	0.0376451
PI4KB	2.89731	0.789243	0.273985	2.88061	0.00396907	0.0376484
GABRA2	2.12793	-1.14842	0.398756	-2.88001	0.00397662	0.0376888
OR10R2	2.32088	-1.62555	0.564911	-2.87753	0.00400795	0.0379542
TPD52L3	2.36098	-1.26629	0.440332	-2.87575	0.0040307	0.0381379
BCKDHB	2.96093	0.817744	0.284394	2.8754	0.00403522	0.038149
ECHS1	3.60439	0.718178	0.249806	2.87494	0.00404106	0.0381714
LIN7A	1.83608	-1.30185	0.452866	-2.87469	0.00404428	0.0381714
UBE2D3	5.75302	0.565842	0.196863	2.87429	0.00404936	0.0381805
MXRA7	2.99483	0.894852	0.311379	2.87383	0.00405522	0.0381805
SUV39H1	1.73309	-1.1324	0.39404	-2.87383	0.00405528	0.0381805
TUFM	3.61379	0.718969	0.25022	2.87335	0.00406141	0.0382067
ZNF677	2.15051	-1.34679	0.468878	-2.87238	0.00407399	0.0382935
ARPC4	3.62077	0.760145	0.264677	2.87198	0.00407915	0.0383104
SNRPC	3.38028	0.754508	0.262779	2.87127	0.00408832	0.038365
ATP5MGL	3.05125	-1.07327	0.373986	-2.86982	0.00410705	0.0385091
UQCRHL	6.17027	0.650845	0.226846	2.8691	0.00411635	0.0385646
RASA2	1.89113	-1.1208	0.390708	-2.86865	0.00412231	0.0385887
TARDBP	5.81959	0.608741	0.212231	2.86829	0.00412691	0.0386002
TRMT61B	2.14988	-1.17447	0.409921	-2.86511	0.00416866	0.0389587
PSME1	2.5854	1.09181	0.381284	2.86351	0.00418974	0.0391058
FREM2	2.25661	-1.06671	0.372533	-2.8634	0.00419125	0.0391058
ANKLE2	3.70898	0.689185	0.240775	2.86236	0.00420493	0.0392014
UGT2B11	4.94657	-0.650478	0.227305	-2.8617	0.00421376	0.0392516
TSPAN1	1.59759	-1.2151	0.425169	-2.85791	0.00426443	0.0396588
OR4K14	1.77984	-1.32673	0.464206	-2.85807	0.00426225	0.0396588
COIL	3.19804	0.79738	0.279143	2.85653	0.00428304	0.0397995
MDH1	4.72101	-0.617893	0.216332	-2.85623	0.00428702	0.039804
GGA2	5.89901	0.592147	0.207533	2.85326	0.00432726	0.040145
EPHB2	2.37781	0.926637	0.324876	2.85228	0.00434066	0.0402366
VHLL	2.04266	-1.09781	0.384996	-2.85149	0.00435149	0.0403043
LRCOL1	2.01367	-1.16402	0.408381	-2.85034	0.00436728	0.0404177
MRPS16	8.92111	0.646964	0.227068	2.84921	0.00438279	0.0405117
ISCU	3.58032	0.731407	0.256717	2.84908	0.00438453	0.0405117
SF3B3	4.71947	0.637783	0.223995	2.84731	0.00440904	0.0406066
GHITM	3.59324	0.695341	0.244159	2.84791	0.0044008	0.0406066
EIF4A3	3.36427	0.745754	0.261898	2.8475	0.00440639	0.0406066
PPM1G	3.38653	0.827295	0.290536	2.84748	0.0044067	0.0406066
BARX2	3.13991	-0.877831	0.308464	-2.84582	0.00442978	0.0407647
HSPA5	7.41221	0.679645	0.238967	2.84409	0.0044538	0.0409527
PPP4C	2.76128	0.904619	0.31841	2.84105	0.0044965	0.0413121
ALKBH1	2.00188	-0.963369	0.339129	-2.84072	0.00450121	0.041322
RGS8	1.73962	-1.09516	0.385798	-2.83869	0.00452991	0.0415521
COX7B	3.14915	0.82269	0.2899	2.83784	0.00454203	0.0416298
FGFRL1	4.68356	-0.721902	0.254527	-2.83624	0.00456478	0.0418047
MCU	3.87613	-0.692569	0.244282	-2.83512	0.00458081	0.0418843
OR11A1	1.65042	-1.2078	0.426009	-2.83515	0.00458035	0.0418843
H2AB1	2.71666	1.00261	0.353702	2.83462	0.00458801	0.0419166
RTN4	24.4342	0.52902	0.186888	2.83068	0.00464495	0.0423992
CNNM1	2.70536	-0.954897	0.337366	-2.83045	0.00464827	0.0423992
SGO2	1.65851	-1.31949	0.466268	-2.82989	0.00465635	0.042439
NOLC1	2.88393	0.865619	0.305972	2.82908	0.00466819	0.042513
YBX3	4.47767	0.680404	0.240574	2.82826	0.00468021	0.0425884
CSRP2	3.71534	0.738862	0.261298	2.82766	0.00468897	0.0426341
ZNF417	17.6188	0.626224	0.221722	2.82437	0.00473734	0.0430397
HS3ST5	1.6142	-1.30022	0.460458	-2.82374	0.00474662	0.0430897
LRRC18	1.57235	-1.23373	0.437053	-2.82283	0.00476023	0.0431788
CPEB4	2.86097	-0.77899	0.276109	-2.82131	0.00478281	0.0433492
CYREN	3.54719	1.23255	0.436932	2.82092	0.00478864	0.0433676
PNRC1	5.50184	0.653638	0.231799	2.81984	0.00480471	0.0434786
ITGBL1	1.97802	-1.05808	0.375641	-2.81674	0.00485136	0.043866
CHMP2A	2.29044	0.977012	0.346984	2.81573	0.0048667	0.0439332
SLC25A12	2.16329	-0.974885	0.346228	-2.81573	0.00486658	0.0439332
PLAC8L1	1.77476	-1.36578	0.485095	-2.81549	0.00487035	0.0439332
ZBTB22	3.18362	-0.937354	0.333118	-2.81388	0.0048947	0.044118
COQ10A	2.31338	-0.953522	0.33918	-2.81126	0.00493485	0.0444097
ADCY2	2.15958	-1.07495	0.382352	-2.81143	0.0049322	0.0444097
RFX2	5.42161	-0.591965	0.210721	-2.80923	0.00496602	0.044628
PAK5	1.69519	-1.16386	0.414307	-2.80917	0.00496693	0.044628
OR4D6	1.75372	-1.08171	0.385426	-2.80654	0.0050076	0.0449581
ZFP1	12.5843	-0.499973	0.178245	-2.80498	0.005032	0.0451416
SQSTM1	4.74876	0.652997	0.232845	2.80443	0.0050405	0.0451824
MAP4K4	7.05436	0.613131	0.218656	2.80409	0.00504586	0.0451897
ARF4	4.03872	0.721171	0.257216	2.80375	0.00505117	0.0451897
TMEM178A	2.15192	-1.03735	0.370003	-2.80362	0.0050532	0.0451897
CDC27	3.43049	0.870899	0.310895	2.80127	0.0050902	0.0454849
NPLOC4	4.46945	0.705803	0.252006	2.80074	0.00509861	0.0455245
SRI	2.55254	0.830698	0.296761	2.79922	0.00512267	0.0456678
PLEKHA7	2.95085	-1.17783	0.420742	-2.7994	0.00511975	0.0456678
IGFBP4	7.45541	0.581064	0.207703	2.79756	0.00514897	0.0457949
PRKDC	7.60089	0.552815	0.197597	2.79769	0.00514694	0.0457949
MRPL50	2.44191	-0.887365	0.317142	-2.79801	0.00514186	0.0457949
TTN	41.6243	-0.613846	0.219448	-2.79723	0.00515432	0.0458068
USE1	3.9254	-0.684843	0.24488	-2.79665	0.00516361	0.0458537
DHDDS	2.37505	-0.867005	0.310074	-2.79612	0.00517204	0.0458928
UGT3A1	1.83436	-1.05916	0.378966	-2.79487	0.00519199	0.046034
EIF4G2	18.4403	0.582271	0.208481	2.79293	0.00522335	0.0462761
CAVIN4	7.15586	-0.615964	0.220702	-2.79093	0.00525563	0.0464589
ODC1	3.5534	0.781069	0.279833	2.7912	0.00525138	0.0464589
UPK1A	1.99111	-1.05754	0.378925	-2.7909	0.00525619	0.0464589
RTL8C	14.3878	0.537585	0.192701	2.78973	0.00527525	0.0465912
MTA1	4.66254	0.665999	0.238881	2.788	0.00530347	0.0467096
PTPRS	3.56276	0.730795	0.26211	2.78812	0.00530143	0.0467096
SERINC2	3.89318	0.784841	0.28149	2.78816	0.00530076	0.0467096
COL16A1	3.10319	-1.07315	0.384931	-2.7879	0.00530502	0.0467096
SLC13A1	2.9003	-0.989583	0.355036	-2.78727	0.00531538	0.0467647
GNG5	3.62952	0.700775	0.251565	2.78566	0.00534195	0.0469501
FAM153B	2.90941	-0.814397	0.292371	-2.78549	0.00534468	0.0469501
NFKBIE	1.91052	-0.971353	0.348847	-2.78446	0.00536162	0.0470626
RANBP1	4.86067	0.641747	0.230646	2.78239	0.00539598	0.0472668
ZC3H13	3.77975	0.730525	0.262559	2.78232	0.00539712	0.0472668
PPP1R10	3.43953	0.76913	0.276456	2.78211	0.00540068	0.0472668
KIF20A	2.04923	-1.16786	0.41978	-2.78206	0.00540144	0.0472668
TNRC6C	2.27478	-0.88766	0.319367	-2.77944	0.00544532	0.0476142
CAVIN1	2.59224	0.926505	0.333597	2.77732	0.00548092	0.0478581
VARS2	2.20541	-0.909108	0.327338	-2.77728	0.0054816	0.0478581
NSFL1C	3.3109	0.76418	0.275333	2.77547	0.00551213	0.0480879
KCNK2	1.9234	-1.14136	0.411364	-2.77457	0.00552755	0.048112
NCAPH	1.68109	-1.0659	0.384153	-2.77468	0.00552554	0.048112
RRP8	1.66664	-1.11106	0.400397	-2.77491	0.00552176	0.048112
ANKRD30BL	2.52495	-0.852836	0.307452	-2.77388	0.00553913	0.0481761
TRIM45	8.96186	0.526739	0.189934	2.77327	0.00554967	0.048231
AARS1	4.01839	0.901568	0.325131	2.77294	0.00555525	0.0482428
PHOSPHO1	1.89859	-0.927654	0.33476	-2.7711	0.00558668	0.0484788
ACOX3	2.49393	1.07156	0.386788	2.77041	0.00559865	0.0485089
ABHD16B	2.09291	-1.0927	0.394387	-2.77064	0.00559464	0.0485089
COPB2	3.26885	0.719858	0.260078	2.76786	0.00564258	0.0488524
ARPP21	5.59335	-0.582979	0.210686	-2.76705	0.00565653	0.0489361
RAB11B	4.44429	0.759426	0.274586	2.76571	0.00567989	0.0491009
GALNT10	3.15381	0.716301	0.25911	2.76447	0.00570161	0.0492514
BCKDK	2.53603	0.842868	0.305417	2.75973	0.00578496	0.0499336
PTP4A1	4.30663	0.692863	0.251143	2.75883	0.00580081	0.0500325
SOWAHB	1.95389	-1.1706	0.425466	-2.75134	0.00593529	0.0511538
C5orf51	4.84166	0.690229	0.250923	2.75076	0.00594568	0.0512046
SMIM10L2A	2.07723	-0.960829	0.349394	-2.74999	0.0059597	0.0512867
EPN2	4.78493	0.649996	0.236591	2.74735	0.00600794	0.0516629
ZNF254	2.81525	-0.887759	0.32319	-2.74686	0.00601682	0.0517002
STAU1	2.53955	0.904472	0.329312	2.74655	0.00602258	0.0517108
CARD11	13.9206	-0.378584	0.137905	-2.74526	0.00604633	0.0517978
CCT3	4.28208	0.658003	0.239683	2.74531	0.0060454	0.0517978
CERCAM	2.4383	0.822685	0.299659	2.74541	0.00604358	0.0517978
SEC14L1	5.33242	-0.875627	0.31923	-2.74294	0.0060892	0.0520869
GOLGA7	2.27079	0.896502	0.326813	2.74317	0.00608496	0.0520869
TMEM263	3.25441	0.764521	0.278764	2.74254	0.00609664	0.0521114
ARPC2	7.63281	0.528619	0.193046	2.73831	0.0061755	0.052746
ZFHX2	2.2714	-0.961985	0.351365	-2.73785	0.00618418	0.0527806
SH3BGR	2.5121	-0.937044	0.34232	-2.73734	0.00619389	0.052824
HSD17B6	1.76367	-1.12948	0.412713	-2.73672	0.00620545	0.052883
PLA2G3	2.11518	-1.15256	0.421338	-2.73548	0.00622895	0.0530437
PRNP	3.95628	0.68445	0.250364	2.73382	0.00626045	0.0531533
COPG1	2.75922	0.794972	0.290764	2.73408	0.00625554	0.0531533
PNMA6F	1.64279	-1.09417	0.400219	-2.73393	0.00625826	0.0531533
COTL1	2.00233	1.04469	0.382073	2.73427	0.00625179	0.0531533
HBZ	3.35794	0.797015	0.291644	2.73284	0.00627911	0.0532435
LHFPL2	2.69153	0.945586	0.346017	2.73277	0.00628041	0.0532435
EVC	3.15711	0.786463	0.287819	2.73249	0.00628579	0.0532496
CTNNB1	8.65105	0.618413	0.226544	2.72977	0.00633787	0.0535714
FOXP1	2.497	0.857307	0.314025	2.73006	0.00633225	0.0535714
TNFSF15	1.71868	-1.12115	0.410685	-2.72995	0.00633431	0.0535714
CTNNBL1	4.99858	0.59219	0.217027	2.72865	0.00635943	0.0537139
WDR5	6.53351	0.661583	0.243072	2.72176	0.00649363	0.0548068
MMP13	1.8873	-1.07109	0.393565	-2.7215	0.00649861	0.0548083
TIGD1	2.04015	-0.969034	0.356116	-2.72112	0.0065062	0.0548318
CBWD2	6.66864	0.572321	0.210369	2.72055	0.00651732	0.0548849
RERG	1.75597	-1.01986	0.374973	-2.71983	0.00653156	0.0549644
LAYN	2.18999	-0.961072	0.353512	-2.71864	0.00655507	0.0550809
GPAM	2.45716	-1.13969	0.419203	-2.7187	0.00655386	0.0550809
DCX	10.2547	-0.699758	0.25743	-2.71824	0.00656297	0.0551068
PLXND1	2.48531	0.852043	0.313577	2.71717	0.00658423	0.0552446
ZNF879	2.01349	-1.05653	0.388978	-2.71617	0.00660418	0.0553712
PSMC1	5.02711	0.619306	0.228053	2.71562	0.00661526	0.0553946
PBX2	6.1229	0.690324	0.254212	2.71555	0.00661667	0.0553946
G6PD	2.35743	0.908187	0.334965	2.71129	0.00670221	0.0560695
PRDX5	4.0583	0.691355	0.255236	2.70868	0.00675507	0.0564704
PGRMC1	2.23421	0.895869	0.331003	2.70653	0.00679908	0.0567967
TUT4	3.33861	-0.692475	0.255924	-2.70578	0.00681444	0.0568834
RXRG	2.66311	-0.862313	0.318723	-2.70553	0.00681964	0.0568852
SNX3	3.21036	0.775611	0.286704	2.70526	0.006825	0.0568883
GNAT1	2.28282	-1.31652	0.486851	-2.70415	0.00684789	0.0570374
FGF14	1.80459	-1.20655	0.446238	-2.70382	0.00685474	0.0570528
TMEM14C	2.54638	0.881311	0.325992	2.70348	0.00686186	0.0570704
MLLT6	4.32105	0.639614	0.236655	2.70272	0.00687739	0.0571164
GPR155	1.87593	-1.05292	0.389568	-2.70279	0.00687611	0.0571164
OTULIN	2.26378	-1.10001	0.407045	-2.70242	0.00688376	0.0571277
NTSR1	2.05105	-1.3325	0.493176	-2.70188	0.00689479	0.0571776
MBL2	3.53189	-0.797629	0.295397	-2.7002	0.00692988	0.0574269
NFIA	1.9667	-0.973704	0.36068	-2.69963	0.00694163	0.0574825
SLC10A6	1.79983	-1.08359	0.401474	-2.69904	0.00695401	0.0575433
QARS1	6.30957	0.621359	0.230362	2.69732	0.00699003	0.0577576
TSPAN3	6.09657	0.627832	0.232756	2.69738	0.00698883	0.0577576
PRSS41	2.29439	-1.04322	0.386831	-2.69685	0.00699987	0.057797
SPATA12	2.78757	0.874464	0.324319	2.69631	0.00701132	0.0578497
PEX1	2.19807	-0.923516	0.343087	-2.69179	0.00710704	0.0585548
SYNGR3	1.71427	-1.15303	0.428329	-2.69192	0.00710425	0.0585548
KRT40	1.61037	-1.11761	0.415242	-2.69147	0.00711369	0.0585674
IGF2BP2	4.71104	0.583515	0.216877	2.69053	0.00713379	0.0586905
THBS3	3.75325	0.717239	0.266643	2.68989	0.00714764	0.058762
BEX3	2.71028	0.870919	0.32392	2.68869	0.00717332	0.0589307
PGAP6	2.82696	0.767297	0.285464	2.6879	0.0071903	0.0590277
PPP1CC	3.84813	0.75791	0.282083	2.68683	0.00721336	0.0591744
MIF	2.63317	0.89494	0.33312	2.68654	0.0072197	0.0591839
NRP1	2.01333	0.938448	0.349567	2.6846	0.00726163	0.0594849
FAM91A1	2.45275	-1.16199	0.433005	-2.68354	0.00728471	0.0596312
BASP1	20.4321	0.447128	0.166742	2.68156	0.00732805	0.0599
CCDC80	2.49729	0.838776	0.312779	2.68169	0.00732518	0.0599
H1-5	2.88321	0.779329	0.290738	2.68051	0.0073509	0.0600437
TMA7	34.8126	0.458385	0.171035	2.68007	0.00736063	0.0600802
ZNF703	3.69356	0.734765	0.274225	2.67942	0.00737488	0.0601535
BCL2L10	2.33291	-0.991711	0.370182	-2.67898	0.00738472	0.0601907
FDX2	2.11678	-0.969391	0.361957	-2.6782	0.007402	0.0602885
DENND2C	1.86636	-1.0532	0.393348	-2.67753	0.00741675	0.0603559
GGT6	1.93872	-1.06996	0.399635	-2.67734	0.00742086	0.0603559
TRIM17	24.8903	0.416961	0.155792	2.6764	0.00744169	0.0603701
PRKACG	3.09152	-0.733376	0.273995	-2.67661	0.00743718	0.0603701
PCGF2	2.29061	0.895772	0.334628	2.67692	0.0074303	0.0603701
FAM155A	1.91784	-1.01031	0.377499	-2.67631	0.00744375	0.0603701
EPRS1	2.24274	-0.841351	0.314551	-2.67477	0.00747802	0.0606049
IARS2	2.83091	0.784342	0.293266	2.6745	0.00748398	0.0606101
SYP	2.38707	-0.868797	0.324908	-2.67398	0.00749567	0.0606618
PAM	3.6279	0.699648	0.261832	2.67213	0.00753724	0.060955
KBTBD11	2.22861	-0.838044	0.313742	-2.67113	0.00755969	0.0610932
KLHDC7A	1.70114	-1.07813	0.404008	-2.6686	0.00761689	0.0615119
LACRT	1.94545	-1.08441	0.406496	-2.66769	0.0076374	0.061634
MAP7D1	5.5305	0.634485	0.237915	2.66685	0.00765654	0.0617011
ZNF134	1.84203	-1.07123	0.401654	-2.66705	0.00765194	0.0617011
CCND1	3.25957	0.804925	0.301987	2.66543	0.00768891	0.0619182
CREG1	2.18272	0.914644	0.343309	2.6642	0.00771723	0.0621025
PPP1R27	1.79971	-1.11568	0.418886	-2.66345	0.00773448	0.0621975
ADAMTS12	1.92537	-0.998852	0.375098	-2.66291	0.0077469	0.0622534
SOGA1	6.72436	-0.624498	0.234576	-2.66224	0.00776221	0.0623205
EXOC7	5.18586	0.609086	0.228801	2.66207	0.00776617	0.0623205
E2F4	3.64337	0.677139	0.254442	2.66127	0.00778468	0.0624251
TAP1	2.25154	-0.873698	0.328364	-2.66076	0.00779649	0.0624759
ZER1	3.02062	0.800517	0.301196	2.6578	0.00786529	0.0628645
ASCL1	1.74142	-1.06145	0.399381	-2.65772	0.00786701	0.0628645
ELMO3	2.29539	-0.923517	0.347392	-2.65843	0.00785051	0.0628645
WDPCP	1.97233	-0.952427	0.358308	-2.65812	0.00785775	0.0628645
HNRNPR	5.1958	0.621856	0.234352	2.65352	0.00796578	0.0635993
ABTB1	3.01533	0.86999	0.327886	2.65333	0.00797012	0.0635993
AGPAT5	4.38947	0.660618	0.249189	2.65107	0.00802366	0.0638035
MAPK6	3.0359	0.911778	0.343914	2.65118	0.00802102	0.0638035
GPR160	2.33572	-0.866291	0.326729	-2.6514	0.00801584	0.0638035
ADARB2	1.79996	-1.00868	0.380384	-2.65173	0.00800805	0.0638035
TBC1D9	2.11697	0.971345	0.366299	2.65178	0.00800685	0.0638035
SMIM40	14.4102	0.520651	0.196458	2.65019	0.00804471	0.063845
SLC2A3	4.52372	0.583246	0.220081	2.65015	0.00804566	0.063845
LZTS3	2.3398	-0.969028	0.365611	-2.65043	0.00803884	0.063845
TEX2	3.18023	0.750777	0.283432	2.64888	0.00807585	0.06404
TTLL11	1.98014	-0.935264	0.353125	-2.64854	0.00808412	0.064061
NAA20	2.37556	0.938191	0.354395	2.6473	0.00811368	0.0642506
ANXA11	6.32567	0.579404	0.2189	2.64688	0.0081237	0.0642854
PAM16	9.6087	-0.48972	0.185054	-2.64637	0.00813614	0.0642947
ZFY	2.26511	-0.809978	0.306047	-2.64658	0.00813113	0.0642947
MAOA	2.06343	-0.936356	0.353938	-2.64553	0.00815621	0.064405
PRAMEF8	2.00467	-1.0959	0.414281	-2.64532	0.0081614	0.064405
RIF1	2.94552	-0.729294	0.275906	-2.64327	0.00821099	0.0647516
RBCK1	2.35121	-0.818466	0.309987	-2.64033	0.00828262	0.0652714
UBTD1	2.85065	0.828259	0.314403	2.63438	0.00842899	0.066379
NAP1L4	3.71275	0.698222	0.265089	2.63391	0.00844073	0.0663799
KCNF1	2.78749	0.747445	0.28377	2.63398	0.00843905	0.0663799
EIF3B	5.44802	0.509183	0.19344	2.63226	0.00848186	0.066601
PSMF1	3.10319	0.773058	0.293656	2.63253	0.00847524	0.066601
STIM2	2.92828	-0.778093	0.295619	-2.63208	0.00848636	0.066601
PARG	2.18289	-0.908092	0.345095	-2.63142	0.00850278	0.0666382
IL26	1.6449	-1.07581	0.408822	-2.6315	0.00850099	0.0666382
STAMBP	3.33736	0.963268	0.366196	2.63047	0.00852658	0.0667789
PITPNM2	2.01107	-1.01759	0.387092	-2.6288	0.00856863	0.0670622
G3BP1	6.21971	0.524265	0.199467	2.62832	0.00858069	0.0670646
NCCRP1	1.78273	-1.11188	0.423022	-2.62842	0.00857828	0.0670646
CHIC2	2.35633	-0.792522	0.301595	-2.62777	0.00859461	0.0670872
TNFRSF10B	2.77028	0.789404	0.300411	2.62774	0.00859534	0.0670872
DPP8	2.10809	-0.993411	0.378238	-2.62642	0.00862876	0.067302
HNRNPAB	4.60048	0.629763	0.239834	2.62583	0.00864375	0.0673729
CELF2	4.55064	0.651187	0.2485	2.62046	0.00878102	0.0683961
SEC63	4.9742	0.566195	0.216119	2.61983	0.00879739	0.0684769
SHMT1	1.74673	-1.01612	0.388154	-2.61782	0.00884929	0.0688338
MRPL12	2.24014	0.916773	0.350438	2.61608	0.00889463	0.0691394
RPS7	5.94351	0.671349	0.256728	2.61502	0.00892219	0.0693064
CYP27A1	2.02628	-1.07884	0.412609	-2.61467	0.00893135	0.0693304
NME9	1.65099	-1.0755	0.411474	-2.61378	0.00895474	0.0694175
TNFRSF10A	1.8798	-1.06932	0.409102	-2.61383	0.00895328	0.0694175
PNLIPRP3	11.2032	0.507934	0.194397	2.61287	0.00897855	0.0695076
CDC42BPB	3.96509	0.675283	0.258445	2.61287	0.00897854	0.0695076
STK10	2.54682	0.844135	0.323142	2.61227	0.00899424	0.0695819
EIF3K	5.00288	0.635145	0.243282	2.61074	0.00903472	0.0698477
ZNF568	8.02028	0.653803	0.250542	2.60956	0.00906596	0.0699471
REEP1	4.312	-0.766918	0.293879	-2.60963	0.00906389	0.0699471
FAM214A	2.69957	-0.806199	0.308892	-2.60997	0.00905494	0.0699471
SAMD4B	3.32316	1.21073	0.464297	2.60767	0.00911613	0.0702866
TSPAN9	4.80246	-0.70119	0.268948	-2.60716	0.00912975	0.0703441
DDX39B	9.23061	0.455477	0.174821	2.6054	0.00917682	0.0706425
BARHL2	5.47277	0.589464	0.22626	2.60524	0.00918086	0.0706425
KRBA2	2.28427	-0.875158	0.335956	-2.60498	0.00918805	0.0706502
RCC1L	6.01523	0.996894	0.382875	2.60371	0.00922215	0.0708646
MFNG	1.69079	-1.02555	0.39396	-2.60319	0.00923608	0.0709239
RAB26	2.24285	-0.94538	0.363244	-2.60261	0.00925182	0.070997
CARNS1	3.23158	-0.758507	0.291474	-2.60232	0.00925964	0.0710093
NDUFB2	2.94384	0.785384	0.301884	2.60161	0.00927876	0.0710604
TMEM14B	2.28912	0.875976	0.336703	2.60163	0.00927825	0.0710604
SNRPF	2.48408	0.792037	0.304527	2.60088	0.00929848	0.0711636
SLC37A2	1.71858	-1.13264	0.43558	-2.60031	0.00931399	0.0712346
LIM2	1.68147	-1.07384	0.413353	-2.59787	0.00938041	0.0716945
AKAP6	3.8137	-0.714956	0.275271	-2.59728	0.00939643	0.0717206
RNFT2	3.60628	-1.19915	0.461788	-2.59675	0.00941117	0.0717206
PPP2R2B	2.35086	-0.85711	0.330057	-2.59685	0.00940825	0.0717206
PARPBP	2.11772	-1.13453	0.436807	-2.59733	0.00939506	0.0717206
RLN2	1.60569	-1.06081	0.408538	-2.5966	0.00941525	0.0717206
PLP1	1.70862	-1.06546	0.410378	-2.59629	0.00942351	0.0717356
TCIM	4.90114	-0.578484	0.222876	-2.59554	0.00944429	0.0718458
UGDH	4.13566	0.591182	0.227861	2.59448	0.00947328	0.0720184
HCK	5.80623	0.55936	0.215622	2.59417	0.00948199	0.0720366
USP22	6.7207	0.651238	0.251218	2.59232	0.00953305	0.0723282
TXLNB	3.66248	-0.690932	0.26652	-2.59242	0.00953036	0.0723282
LMF2	3.63681	0.679499	0.26225	2.59104	0.0095687	0.0725023
MICAL3	2.69067	-0.773454	0.298485	-2.59127	0.00956238	0.0725023
DOK1	2.29643	-0.871384	0.336341	-2.59078	0.009576	0.0725094
EDN2	2.37359	-0.902994	0.34919	-2.58597	0.00971059	0.0734798
CADM1	1.86222	-1.06506	0.411902	-2.58571	0.00971781	0.0734857
CCDC86	7.7331	-0.504727	0.195309	-2.58424	0.00975927	0.0737504
FNDC1	1.86325	-0.962357	0.372564	-2.58306	0.00979274	0.0739543
HOXC10	2.8737	-0.919626	0.356063	-2.58277	0.00980119	0.0739692
ESYT1	4.6986	0.572195	0.221586	2.58227	0.00981516	0.0740256
TMEM41B	3.77865	0.632049	0.244796	2.58194	0.00982466	0.0740483
NFE4	2.46061	-0.805384	0.311995	-2.5814	0.00984018	0.0741084
TBX3	1.82528	-1.00854	0.390723	-2.5812	0.00984561	0.0741084
H2AC4	1.83046	-0.917482	0.355509	-2.58075	0.00985849	0.0741564
ZNF714	16.7629	0.504012	0.195396	2.57945	0.00989589	0.0743887
DGKI	2.31483	-1.06558	0.413278	-2.57835	0.00992742	0.0745766
ZNF302	2.28385	-0.798945	0.309901	-2.57806	0.00993557	0.0745886
TNPO1	3.71163	0.64883	0.251817	2.57659	0.00997803	0.0748582
RTRAF	3.41708	0.731846	0.284146	2.57559	0.0100068	0.0749261
KCNH2	3.99425	0.625007	0.242647	2.57579	0.0100011	0.0749261
ATP2B3	2.70289	-0.779841	0.302742	-2.57593	0.00999715	0.0749261
BORCS6	2.05718	-1.0525	0.408695	-2.57528	0.0100158	0.0749448
CHRND	10.2471	0.496305	0.192911	2.57272	0.0100904	0.0751576
LZTS1	3.80603	0.669989	0.260384	2.57308	0.0100797	0.0751576
GRIP2	3.57854	-0.648596	0.252026	-2.57353	0.0100666	0.0751576
H2AX	2.8597	0.764255	0.297017	2.5731	0.0100791	0.0751576
CD248	2.10904	0.958369	0.372511	2.57273	0.01009	0.0751576
GGTA1	1.63467	-1.17554	0.456712	-2.57393	0.0100551	0.0751576
DMD	1.90282	-0.939582	0.3651	-2.57349	0.0100679	0.0751576
CDIN1	1.68935	-1.17941	0.458547	-2.57206	0.0101095	0.0752505
DDT	3.05563	-0.851009	0.331004	-2.57099	0.0101407	0.0754342
NECTIN3	4.41183	-0.627018	0.243929	-2.57049	0.0101554	0.075494
SEC61A1	4.78088	0.609169	0.237056	2.56972	0.0101781	0.0756132
KPNB1	6.12328	0.534583	0.208072	2.56922	0.0101926	0.0756722
TSSK2	1.74494	-1.14076	0.444202	-2.56812	0.0102251	0.075864
AVPR1A	1.47854	-1.10826	0.431645	-2.56753	0.0102426	0.0759441
IL36RN	2.25508	-0.873807	0.340454	-2.56659	0.0102703	0.0761006
ADGRA3	5.40138	0.613594	0.239195	2.56525	0.0103103	0.0762972
SPTY2D1OS	3.10266	-0.712862	0.277869	-2.56546	0.0103038	0.0762972
DOK5	2.29773	-0.903247	0.352152	-2.56494	0.0103195	0.0763159
DCAF4L2	1.83511	-0.956236	0.373012	-2.56356	0.0103606	0.0765706
SETBP1	2.20287	-0.847462	0.330693	-2.56269	0.0103865	0.0767123
SIGLEC12	1.90177	-0.970991	0.378975	-2.56215	0.0104027	0.0767818
TUSC3	3.27762	0.722341	0.282029	2.56123	0.0104302	0.0769356
ARHGEF9	2.0509	-1.11203	0.434309	-2.56045	0.0104538	0.0770595
PRMT2	7.84328	0.549734	0.214724	2.56019	0.0104615	0.0770665
AGL	4.75579	-0.63656	0.24871	-2.55945	0.0104839	0.0771815
CKM	14.127	-0.573314	0.224058	-2.55878	0.0105041	0.0772809
TMEM270	1.7698	-1.07091	0.418792	-2.55714	0.0105536	0.077595
PNMA5	1.97458	-1.07843	0.421787	-2.55682	0.0105633	0.0776163
MAST2	2.98511	-0.693372	0.271349	-2.55528	0.0106103	0.077761
TOMM5	2.96801	0.828372	0.324179	2.5553	0.0106098	0.077761
C11orf52	1.71617	-1.0952	0.428588	-2.55536	0.0106079	0.077761
PSG8	1.61724	-1.04413	0.408563	-2.55561	0.0106003	0.077761
FABP5	3.407	0.789239	0.309022	2.55399	0.0106498	0.0780003
SEPTIN7	6.75912	0.608085	0.238139	2.55348	0.0106652	0.078013
LRP1	3.9144	0.775789	0.303797	2.55364	0.0106604	0.078013
TAF6	6.34931	0.555483	0.21759	2.55288	0.0106835	0.0780974
POPDC2	1.54667	-1.14575	0.449147	-2.55094	0.0107433	0.0784836
NBPF19	6.79525	0.543832	0.213225	2.55051	0.0107566	0.0784889
SRPK3	5.33827	-0.552171	0.216498	-2.55047	0.0107577	0.0784889
DVL3	4.61697	0.558263	0.218915	2.55014	0.0107679	0.078513
MYF6	2.08571	-0.84315	0.330736	-2.54931	0.0107936	0.0785998
RTL1	2.16846	-0.960404	0.376705	-2.54948	0.0107883	0.0785998
BRI3	3.38513	0.691623	0.271333	2.54898	0.0108038	0.0786238
PHLDA2	2.64321	0.770083	0.302275	2.54763	0.0108458	0.0788794
TRIR	4.75257	0.634173	0.249008	2.54679	0.0108718	0.0790178
SULT1C2	1.87686	-1.11527	0.438023	-2.54615	0.0108917	0.0791122
AMACR	4.51111	-0.591424	0.23239	-2.54497	0.0109288	0.0793311
POLDIP2	3.2529	0.709195	0.278693	2.54472	0.0109365	0.0793369
DEPTOR	3.08152	-0.69454	0.273103	-2.54315	0.0109859	0.0796443
STT3A	6.01054	0.479093	0.188403	2.54292	0.0109932	0.0796463
RIC1	2.38069	-0.917842	0.361012	-2.54242	0.0110089	0.0797099
RARRES2	3.47494	-0.703043	0.276649	-2.54128	0.0110448	0.0798791
TMEM169	1.91562	-1.16738	0.459375	-2.54123	0.0110463	0.0798791
PIGR	2.2632	-0.993273	0.390976	-2.54049	0.0110697	0.0799974
FKBP8	3.01508	0.77391	0.304675	2.54012	0.0110815	0.0800322
SLC36A1	4.33205	-0.651251	0.25643	-2.53968	0.0110952	0.0800809
CBX6	3.45667	0.646359	0.254576	2.53897	0.011118	0.0801946
NDRG2	4.42816	-0.673609	0.265352	-2.53855	0.0111313	0.0802396
OR7C1	2.07805	-1.04143	0.410307	-2.53819	0.0111429	0.0802722
OR2C3	2.00297	-0.890984	0.351262	-2.53652	0.0111959	0.0806036
RBM24	10.7007	0.534748	0.210856	2.53608	0.0112101	0.0806545
ATP1A1	10.1918	0.53811	0.21225	2.53527	0.0112361	0.0806917
ZNF132	2.12113	-0.924544	0.364675	-2.53526	0.0112365	0.0806917
VAX1	1.84164	-1.19027	0.46943	-2.53555	0.011227	0.0806917
TMEM30A	27.8622	0.424944	0.167727	2.53355	0.0112913	0.0810344
COX7A2	4.10535	0.757577	0.299098	2.53287	0.0113132	0.0811404
TIMP3	3.30853	0.73783	0.291412	2.53191	0.0113442	0.0813119
FSTL1	9.26959	0.62654	0.247501	2.53146	0.0113587	0.0813651
RAB19	6.42019	0.580999	0.229537	2.53118	0.011368	0.08138
GLYAT	3.25208	-1.09234	0.431643	-2.53066	0.0113849	0.08145
ATP6V1G1	3.41126	0.688109	0.271963	2.53016	0.0114011	0.0815147
SNCA	3.34777	-0.707408	0.279617	-2.52992	0.011409	0.0815202
ZNF598	3.88637	1.01442	0.401084	2.5292	0.0114321	0.0816346
ZMYM2	4.14085	0.61803	0.24439	2.52887	0.0114431	0.081662
IMPDH2	4.4287	0.665053	0.263122	2.52755	0.0114861	0.0819176
TSNAX	4.3468	-0.620162	0.245386	-2.52729	0.0114945	0.0819263
FN3K	3.08442	-0.617399	0.244472	-2.52544	0.0115553	0.082308
CALHM5	1.94699	-0.921425	0.364895	-2.52518	0.011564	0.0823188
JSRP1	2.91715	-0.75918	0.300815	-2.52375	0.0116111	0.0826025
RGS18	21.7562	0.403489	0.159929	2.52293	0.0116383	0.0826925
MRPS34	3.432	0.733297	0.290645	2.52299	0.011636	0.0826925
HOXA13	1.76349	-0.898702	0.356319	-2.52218	0.0116629	0.0828163
NSA2	3.1906	0.69588	0.27593	2.52195	0.0116708	0.0828204
MXRA5	2.63779	0.741842	0.294205	2.52152	0.011685	0.082839
OTX1	2.21779	-0.881113	0.34945	-2.52143	0.0116879	0.082839
UPP1	4.37058	0.632113	0.250768	2.52071	0.0117118	0.082957
INAVA	2.8561	-0.749066	0.297308	-2.5195	0.0117523	0.083089
TFAP2E	2.41869	0.788545	0.312974	2.51952	0.0117514	0.083089
OTUB2	2.37653	-0.993616	0.394303	-2.51993	0.0117378	0.083089
GPR87	4.91889	-0.697874	0.277142	-2.51811	0.0117988	0.0833659
SERTAD3	3.73688	0.660414	0.262295	2.51783	0.0118079	0.083379
NIPSNAP1	2.08132	0.866293	0.344106	2.51752	0.0118185	0.0834021
RHOQ	6.52786	0.49138	0.195328	2.51566	0.0118809	0.0837903
SMPD3	2.00244	-0.959487	0.381463	-2.51528	0.0118938	0.0838295
SERPIND1	1.6423	-1.1479	0.456444	-2.51487	0.0119077	0.0838759
TIA1	4.188	0.672893	0.267736	2.51327	0.0119617	0.0842043
ITPR1	1.80796	-0.980182	0.390076	-2.5128	0.0119778	0.0842139
KLK13	1.62279	-1.15924	0.461296	-2.513	0.0119708	0.0842139
CHKB	4.1143	0.710975	0.28313	2.51112	0.0120348	0.0845619
HTR1D	3.91694	-0.637389	0.253876	-2.51064	0.0120514	0.0846269
COBL	3.18509	0.722022	0.287662	2.50997	0.0120742	0.0847243
OR8K1	1.87429	-0.92823	0.369874	-2.50959	0.0120872	0.0847243
ECSCR	1.79592	-0.994003	0.396084	-2.50958	0.0120876	0.0847243
MARCHF7	4.15663	0.682992	0.272417	2.50715	0.0121708	0.0851508
BCAT1	2.36267	0.809049	0.322676	2.50732	0.0121652	0.0851508
MSMP	1.51614	-1.10994	0.442702	-2.50719	0.0121696	0.0851508
CREBBP	3.79473	0.69004	0.275257	2.5069	0.0121797	0.0851567
SLC17A5	3.23174	0.692443	0.276237	2.5067	0.0121866	0.0851567
OR2V2	1.69034	-1.09708	0.438018	-2.50464	0.0122577	0.0856013
C5orf15	2.91316	0.746757	0.298182	2.50437	0.0122671	0.0856143
PTPN11	2.89144	0.703656	0.281058	2.5036	0.0122937	0.0856759
CSRP1	2.45382	0.757451	0.302561	2.50346	0.0122984	0.0856759
DACT3	1.94349	-0.874972	0.349481	-2.50363	0.0122926	0.0856759
GATA5	1.67754	-1.04623	0.418004	-2.50292	0.0123173	0.0857552
DSP	2.06241	0.971797	0.3884	2.50205	0.0123476	0.0859137
LSM4	2.71804	0.905447	0.361936	2.50167	0.0123607	0.0859527
SUPT4H1	2.52143	0.783385	0.313256	2.50078	0.012392	0.0861175
CATSPERE	1.79722	-0.973833	0.389472	-2.5004	0.0124054	0.0861586
HAUS5	2.38037	-0.839644	0.335923	-2.49951	0.0124365	0.086247
SLC19A1	2.80398	-1.07811	0.431304	-2.49965	0.0124316	0.086247
CD1A	1.86614	-0.978075	0.391326	-2.49939	0.0124408	0.086247
TRAF5	3.01033	-0.691219	0.276637	-2.49865	0.0124667	0.0862687
L1CAM	2.41603	0.842	0.336959	2.49882	0.0124606	0.0862687
SPRY1	2.25261	-0.8056	0.322367	-2.49902	0.0124538	0.0862687
DNAJB4	3.37163	0.710137	0.28426	2.4982	0.0124826	0.0863268
KCNK13	2.39411	-0.806289	0.322839	-2.49749	0.0125075	0.0864465
HBA2	1.76782	-1.01939	0.408267	-2.49688	0.0125291	0.0865436
CASP2	11.0874	0.459277	0.184063	2.49521	0.0125881	0.0868135
ROBO1	2.70702	0.748308	0.29988	2.49535	0.0125831	0.0868135
OR5T3	2.16386	-0.882052	0.35357	-2.4947	0.0126063	0.0868135
RAD18	1.95369	-0.886382	0.355258	-2.49504	0.0125942	0.0868135
ADAD2	1.95363	-1.01266	0.405893	-2.49489	0.0125997	0.0868135
SEMA6A	7.6465	-0.584159	0.23419	-2.49438	0.0126179	0.0868413
OTUB1	2.88361	0.733984	0.29435	2.49358	0.0126463	0.086984
SYNC	2.91315	-0.732943	0.294078	-2.49234	0.0126905	0.0872359
RAPSN	10.1287	-0.486543	0.195251	-2.49188	0.0127068	0.0872949
GAD2	1.51627	-1.09781	0.440656	-2.49131	0.0127273	0.0873834
P3H2	2.58884	-0.866134	0.347741	-2.49074	0.0127477	0.0874707
MEI1	1.76261	-0.9628	0.386662	-2.49003	0.0127731	0.0875397
TMEM176B	1.87626	-0.974858	0.391488	-2.49014	0.0127694	0.0875397
TRAPPC2B	2.4222	-0.822313	0.330338	-2.48931	0.0127993	0.0876138
CNTNAP1	2.00597	-0.923951	0.371166	-2.48932	0.0127987	0.0876138
HTRA1	3.49533	0.656775	0.264009	2.4877	0.0128572	0.0878493
KPTN	2.27158	-0.888545	0.35715	-2.48788	0.0128507	0.0878493
APOL5	1.9041	-0.954458	0.383702	-2.4875	0.0128644	0.0878493
TRIM58	1.93554	-0.995006	0.399939	-2.48789	0.0128503	0.0878493
CKS2	2.62811	0.767659	0.308837	2.48564	0.0129317	0.0882558
TFCP2	2.49396	-0.787496	0.316947	-2.48463	0.0129686	0.0884549
CPLX2	7.23277	-0.483346	0.194628	-2.48343	0.0130123	0.0886554
PRKAR2A	2.54776	0.803851	0.32371	2.48324	0.0130193	0.0886554
FZD3	2.13782	-0.819993	0.330218	-2.48319	0.0130213	0.0886554
LSM8	2.38595	-0.822025	0.331066	-2.48297	0.0130293	0.0886565
MYL12A	4.77485	0.721844	0.290808	2.4822	0.0130574	0.0886906
YME1L1	7.9143	0.449773	0.1812	2.48219	0.0130576	0.0886906
PIK3CG	4.50763	0.590118	0.237738	2.48222	0.0130568	0.0886906
MTRNR2L1	252.532	0.423136	0.17056	2.48086	0.0131066	0.0887594
NCK1	12.6254	-0.585196	0.235868	-2.48103	0.0131003	0.0887594
UBE2H	6.04006	0.58387	0.235346	2.4809	0.0131053	0.0887594
ALG9	2.11708	-0.860648	0.346888	-2.48106	0.0130994	0.0887594
TCN1	1.79879	-1.25126	0.50431	-2.48114	0.0130963	0.0887594
MRPL20	4.63435	0.578109	0.233212	2.4789	0.0131788	0.089188
TMCO1	3.49935	0.659977	0.26628	2.47851	0.0131934	0.089188
CALCR	1.94261	-0.947375	0.382218	-2.47863	0.0131889	0.089188
STAB2	1.57734	-1.00526	0.405631	-2.47826	0.0132023	0.0891958
SULT1C4	18.1477	0.422654	0.170608	2.47734	0.0132364	0.0893525
CBARP	2.02081	-0.864972	0.349171	-2.47722	0.0132412	0.0893525
LRTM1	3.91629	-0.826344	0.33366	-2.47661	0.0132637	0.0893999
TSPYL1	2.24078	0.875806	0.353686	2.47622	0.0132781	0.0893999
AUTS2	1.89759	-0.899046	0.363077	-2.47618	0.0132795	0.0893999
PAPPA	1.71212	-0.973071	0.392955	-2.47629	0.0132754	0.0893999
TPM1	25.1417	-0.593727	0.239805	-2.47587	0.0132911	0.0894252
PPP1R11	2.88852	0.716047	0.28926	2.47545	0.013307	0.089479
H2AZ1	4.56158	0.568476	0.229677	2.47511	0.0133195	0.0895108
SYT12	2.27194	-0.812155	0.328202	-2.47456	0.0133402	0.0895415
MAS1	2.00215	-0.995215	0.402163	-2.47466	0.0133363	0.0895415
PTGFR	2.12256	-0.992118	0.40096	-2.47436	0.0133477	0.0895415
HMCES	1.8307	-0.87002	0.351733	-2.47352	0.0133788	0.0896978
EXOG	2.31453	-0.901512	0.36453	-2.47308	0.0133955	0.089757
ANP32B	3.68265	0.63593	0.257259	2.47195	0.013438	0.0899361
CCL3	2.32085	-0.83257	0.336804	-2.47197	0.013437	0.0899361
ZNF154	2.13127	-0.96465	0.390353	-2.47123	0.013465	0.0900642
ADGRE2	2.3359	-0.920177	0.372428	-2.47075	0.0134828	0.0901304
GLUL	4.76548	0.556248	0.225165	2.47041	0.013496	0.0901653
ELAVL1	4.05625	0.596188	0.2414	2.46971	0.0135223	0.0901828
BPIFB2	1.85485	-0.999714	0.404787	-2.46973	0.0135215	0.0901828
TNFSF11	1.81893	-0.999718	0.404763	-2.46989	0.0135156	0.0901828
PF4V1	2.15044	-0.977649	0.395956	-2.46909	0.0135459	0.0902347
MUC2	1.75025	-0.992854	0.402103	-2.46915	0.0135434	0.0902347
ST6GALNAC5	1.52079	-0.989687	0.400995	-2.46808	0.0135841	0.0904175
ADRB1	1.93783	-0.951401	0.385504	-2.46794	0.0135892	0.0904175
C18orf32	2.28705	0.854829	0.346546	2.46671	0.0136361	0.0906767
PRPH2	2.01653	-0.937888	0.380268	-2.46639	0.0136483	0.0907053
IRX1	1.59326	-1.02484	0.41561	-2.46587	0.0136679	0.0907826
PDLIM5	4.5328	-0.684393	0.277662	-2.46484	0.0137073	0.0909056
GRHL3	1.83104	-0.949143	0.385117	-2.46456	0.0137183	0.0909056
SLC9A3R2	2.07651	1.02139	0.414386	2.46484	0.0137074	0.0909056
FAF1	2.20934	-0.875694	0.355294	-2.4647	0.0137127	0.0909056
TOPAZ1	1.79589	-1.00982	0.409847	-2.4639	0.0137434	0.0910193
COL20A1	2.02272	-1.04094	0.422532	-2.46358	0.0137556	0.0910468
CCT5	6.24106	0.490144	0.199005	2.46297	0.0137792	0.0911503
PPP2R1A	3.44288	0.618417	0.251228	2.46157	0.0138329	0.0914524
PRPF38B	4.87233	0.552166	0.224342	2.46127	0.0138444	0.0914758
MED23	3.51264	-1.03176	0.419369	-2.46028	0.013883	0.0916533
LBP	1.54222	-1.0664	0.433466	-2.46016	0.0138874	0.0916533
TPD52L1	2.63169	-0.798241	0.324547	-2.45956	0.0139108	0.0917552
AAK1	2.35919	-0.866357	0.352338	-2.45888	0.013937	0.0918747
GET3	2.88567	0.674209	0.2743	2.45793	0.0139741	0.092066
NDST1	5.09279	0.64306	0.261691	2.45733	0.0139974	0.0921666
TMEM126B	7.50996	0.501328	0.204055	2.45682	0.0140173	0.0922398
ITIH5	1.93119	-0.860926	0.35045	-2.45663	0.0140247	0.0922398
CASTOR2	2.51647	-0.70654	0.287641	-2.45632	0.0140367	0.0922429
BAG1	2.32249	-0.860907	0.350503	-2.4562	0.0140414	0.0922429
UQCRQ	3.11902	0.772495	0.31458	2.45564	0.0140634	0.0923344
HELQ	2.40278	-0.827569	0.337087	-2.45506	0.0140861	0.0923773
UNC80	1.60089	-1.07795	0.439065	-2.4551	0.0140845	0.0923773
HDAC4	1.95859	-0.862748	0.351709	-2.45302	0.0141663	0.0928498
RRP36	2.76309	0.761278	0.310441	2.45224	0.0141969	0.0929968
GPS1	2.91773	0.750429	0.306049	2.45199	0.0142068	0.0930084
CAMK2D	5.24333	0.553561	0.225823	2.45131	0.0142337	0.0931113
ZNF579	5.27409	0.891584	0.363767	2.45098	0.014247	0.0931113
AK2	3.21164	0.744779	0.303845	2.45118	0.014239	0.0931113
GTF2F1	2.6466	0.732566	0.299009	2.44997	0.0142866	0.0933169
EFHC2	1.63119	-0.953401	0.389195	-2.44968	0.0142984	0.0933407
BIN1	21.4881	0.4444	0.181517	2.44826	0.014355	0.093496
MLXIP	3.34246	0.619464	0.252974	2.44873	0.0143361	0.093496
FAM90A26	2.18475	-0.899823	0.367531	-2.44829	0.0143535	0.093496
CHAD	1.75111	-0.996377	0.406974	-2.44825	0.014355	0.093496
ILDR2	1.97484	-0.98632	0.402919	-2.44794	0.0143676	0.0935246
PTCRA	1.95115	-0.880016	0.359637	-2.44695	0.014407	0.0937274
ZNF117	4.95314	-0.583795	0.238699	-2.44574	0.0144555	0.0939611
APH1B	3.23435	-0.632571	0.258652	-2.44564	0.0144593	0.0939611
SMOC2	2.13036	-0.987866	0.404045	-2.44494	0.0144877	0.0940915
UBR3	2.73836	-0.764612	0.312909	-2.44356	0.0145432	0.09439
RNASE7	1.601	-0.989179	0.404873	-2.44318	0.0145584	0.09439
CD300LF	1.89866	-0.994416	0.406998	-2.4433	0.0145538	0.09439
DLGAP4	6.97979	-0.675402	0.276474	-2.44292	0.0145691	0.0944057
MTMR11	1.96064	-0.899576	0.368275	-2.44267	0.0145789	0.0944156
ELL	6.22473	-0.666558	0.273054	-2.44113	0.0146415	0.094767
ZMAT2	3.26555	0.643868	0.263879	2.44001	0.0146868	0.0950061
PRMT1	5.5386	0.608731	0.249586	2.43897	0.0147294	0.0951981
ALYREF	2.61661	0.739112	0.303055	2.43887	0.0147331	0.0951981
HSD17B4	2.64689	0.715884	0.29356	2.43863	0.0147432	0.0952095
PARVB	2.95173	0.775697	0.318334	2.43674	0.0148203	0.0956531
SLCO2B1	3.50678	1.12231	0.460894	2.43507	0.0148888	0.0960373
SLC25A18	1.90088	-0.838999	0.344575	-2.43488	0.0148967	0.0960373
PON3	2.04755	-0.836796	0.343713	-2.43458	0.0149091	0.0960629
GPR21	2.09656	-0.893833	0.367192	-2.43424	0.014923	0.0960982
NR2F2	5.03643	0.531093	0.218246	2.43346	0.0149552	0.0962514
BRAP	2.51797	-0.763515	0.31391	-2.43228	0.0150043	0.0965127
KDSR	2.74407	-0.690098	0.283781	-2.4318	0.0150241	0.0965318
C1QTNF4	2.00298	-0.826129	0.339717	-2.43181	0.0150234	0.0965318
UFM1	3.77745	0.636425	0.261747	2.43145	0.0150384	0.0965693
CDYL	2.45743	0.797738	0.328332	2.42967	0.0151125	0.0969901
ATP1B3	7.5487	0.519873	0.214016	2.42913	0.015135	0.0970254
OR2T29	1.71614	-0.912082	0.375446	-2.42933	0.0151268	0.0970254
EEF2K	2.25686	0.779718	0.321148	2.42791	0.0151862	0.0972411
PLSCR3	2.55662	0.759257	0.312745	2.42772	0.0151942	0.0972411
NUDT19	1.91358	-0.865944	0.356642	-2.42805	0.0151803	0.0972411
LAMC3	2.1825	-0.912185	0.375795	-2.42734	0.0152098	0.0972866
OPHN1	2.29176	-0.816893	0.336855	-2.42506	0.015306	0.0978413
ZNF232	2.20272	-0.812736	0.335166	-2.42487	0.0153137	0.0978413
FGF13	2.31982	-0.761327	0.314003	-2.42458	0.0153259	0.0978647
WDSUB1	1.60473	-1.05603	0.435719	-2.42365	0.0153654	0.0980071
FZD9	2.23116	-0.95964	0.395937	-2.42372	0.0153624	0.0980071
TBC1D14	2.83701	0.724218	0.298914	2.42283	0.0154	0.0981183
KIF12	2.05475	-0.811305	0.334858	-2.42283	0.0154	0.0981183
POMT1	1.95969	-0.828674	0.342172	-2.42181	0.0154436	0.098286
ZBED1	2.52012	-0.765015	0.315862	-2.42199	0.0154359	0.098286
EVA1B	2.33959	0.741375	0.306454	2.41921	0.0155543	0.0988804
SPARCL1	2.18068	-0.941004	0.388971	-2.41921	0.0155541	0.0988804
GPC2	2.02256	-0.804927	0.332827	-2.41846	0.0155865	0.09903
ANKFY1	2.04855	-0.798837	0.330341	-2.41822	0.0155967	0.0990392
XPO4	3.01017	-0.800828	0.331407	-2.41645	0.0156728	0.0994671
DVL1	21.7315	0.422659	0.174932	2.41613	0.0156863	0.0994979
SNRPD3	4.62659	0.554974	0.229772	2.41533	0.015721	0.0996627
MDFI	3.48256	0.655863	0.2716	2.41481	0.0157435	0.0997496
ASB4	1.70686	-1.04512	0.433098	-2.41313	0.0158161	0.100154
UCHL1	3.89017	0.591454	0.245151	2.41261	0.0158388	0.100242
ALX1	1.78652	-0.918993	0.381023	-2.41191	0.0158691	0.100378
ARHGAP1	2.36483	0.781704	0.324234	2.41093	0.0159121	0.100556
ARHGAP11B	2.48194	-0.809541	0.335789	-2.41086	0.0159149	0.100556
ARG1	2.2429	-0.86895	0.360474	-2.41058	0.0159273	0.100579
PSMD3	6.23503	-0.501329	0.20805	-2.40965	0.0159677	0.100667
RRBP1	4.30511	0.581033	0.241119	2.40973	0.0159642	0.100667
IL7	1.99412	-0.93563	0.388225	-2.41002	0.0159516	0.100667
SRRT	4.0046	0.571841	0.237356	2.40922	0.0159868	0.100732
OGG1	1.74688	-0.932917	0.387314	-2.40868	0.0160102	0.100824
KRTAP13-3	1.81319	-0.905513	0.376146	-2.40734	0.0160691	0.101139
AIRE	1.81013	-0.888047	0.368973	-2.40681	0.0160925	0.10123
HTN1	1.71022	-1.02069	0.424169	-2.40632	0.0161139	0.101309
IFRD2	7.42789	0.436049	0.181263	2.40561	0.0161454	0.101451
PTOV1	6.13259	0.549244	0.228345	2.40532	0.0161582	0.101476
TMEM221	2.92644	-1.13515	0.472255	-2.40369	0.0162306	0.101852
UCK1	2.37301	-0.795706	0.331052	-2.40357	0.016236	0.101852
CYFIP2	1.74117	-0.958026	0.398683	-2.40297	0.0162623	0.101905
ROBO2	1.57607	-1.08759	0.452574	-2.40312	0.0162558	0.101905
SLC7A6OS	2.15273	-0.75313	0.313476	-2.40252	0.0162827	0.101977
OR4C3	2.47546	-0.788505	0.328241	-2.40222	0.016296	0.102004
LPP	3.22108	0.669051	0.278554	2.40187	0.0163116	0.102046
ZBTB7B	10.071	0.463546	0.19308	2.4008	0.0163595	0.102134
MYH10	3.33159	0.763097	0.317911	2.40035	0.0163795	0.102134
PHLDB2	3.09238	0.691585	0.288116	2.40037	0.0163786	0.102134
IRF2BPL	3.56794	0.629322	0.262177	2.40037	0.0163785	0.102134
SLC24A4	1.8232	-0.947979	0.394796	-2.40119	0.016342	0.102134
NDUFAF7	2.29822	-0.808898	0.336956	-2.4006	0.0163681	0.102134
C1QC	2.30124	-0.790009	0.329394	-2.39837	0.0164684	0.102577
NOS1AP	1.77502	-0.914406	0.381243	-2.39849	0.0164629	0.102577
TTC37	2.85351	0.755459	0.315016	2.39816	0.0164778	0.10258
CAPN2	3.3055	0.704094	0.293694	2.39737	0.0165132	0.102688
CORO2B	1.65816	-0.937936	0.391218	-2.39747	0.0165085	0.102688
SKP1	8.21097	0.468033	0.19532	2.39624	0.0165643	0.10295
PALMD	4.76784	-0.559031	0.233545	-2.39368	0.0166804	0.103446
KLHDC3	3.854	-0.569113	0.237742	-2.39383	0.0166736	0.103446
ATP6V1F	2.40677	0.732425	0.305953	2.39392	0.0166695	0.103446
RIDA	1.75537	-0.906856	0.378808	-2.39397	0.0166669	0.103446
SEC14L5	1.76987	-0.994567	0.415723	-2.39238	0.0167394	0.103755
ITIH6	1.50236	-1.0629	0.44459	-2.39074	0.0168143	0.104163
EIF3E	4.69724	0.612361	0.256234	2.38985	0.0168553	0.10436
ASPHD2	1.84017	-0.920674	0.385498	-2.38827	0.0169278	0.104752
CRLS1	2.73101	-0.695753	0.291385	-2.38775	0.0169521	0.104846
ANKRD13D	4.38462	0.572819	0.240019	2.38656	0.0170068	0.10507
LAMTOR4	2.61879	0.748962	0.313818	2.38662	0.0170043	0.10507
EPHB6	1.63926	-0.942597	0.39511	-2.38566	0.0170487	0.105272
C13orf42	1.8243	-0.905426	0.37985	-2.38364	0.0171423	0.105793
YBX1	8.58892	0.501384	0.210472	2.38219	0.0172099	0.106094
WDR6	3.74186	0.621604	0.260959	2.382	0.017219	0.106094
IQGAP1	3.14625	0.904671	0.379746	2.3823	0.0172047	0.106094
ZFYVE28	2.07796	-0.922037	0.387197	-2.38131	0.0172512	0.106235
CARD8	2.73477	-0.729592	0.306431	-2.38093	0.0172689	0.106287
KRTAP2-2	1.71265	-1.11262	0.467469	-2.38009	0.0173086	0.106474
C1orf116	1.61967	-0.916053	0.384981	-2.37947	0.0173374	0.106593
BMP1	3.06853	0.626704	0.26344	2.37892	0.0173633	0.106638
CDK6	2.75003	0.793599	0.333578	2.37905	0.0173572	0.106638
SELENON	2.51589	0.745144	0.313326	2.37817	0.0173987	0.10674
ZNF418	2.79095	-0.665829	0.279965	-2.37825	0.0173948	0.10674
CLEC16A	2.56576	-0.650125	0.273409	-2.37785	0.017414	0.106777
GAST	4.35278	-0.609577	0.256533	-2.37621	0.0174915	0.107194
RMC1	1.79673	-0.879017	0.369964	-2.37595	0.0175036	0.107211
RAB5IF	2.21617	0.793694	0.334349	2.37385	0.0176037	0.107766
NDUFS8	2.48544	0.743108	0.31314	2.37309	0.01764	0.10793
DAZAP2	3.21873	0.600961	0.25339	2.37169	0.0177071	0.108264
DUOXA2	1.76727	-0.96293	0.406034	-2.37155	0.0177135	0.108264
COPB1	3.72744	0.678451	0.286174	2.37076	0.0177516	0.108439
C1QTNF5	1.79195	-0.915452	0.38638	-2.36931	0.0178215	0.108808
ZNF200	2.32262	-1.02684	0.433488	-2.36879	0.0178464	0.108901
SLC12A1	1.70935	-0.943295	0.398357	-2.36797	0.0178862	0.109086
SLC16A9	1.83486	-0.960036	0.405732	-2.36618	0.0179726	0.109554
NLRX1	1.63551	-0.991876	0.419361	-2.36521	0.01802	0.109785
C1orf43	3.29918	0.619753	0.262142	2.36419	0.0180695	0.110027
UBE2S	3.46882	0.748115	0.316639	2.36268	0.0181435	0.110419
KRTAP4-3	1.545	-1.07251	0.454196	-2.36133	0.0182098	0.110763
ARRDC1	20.2994	0.465677	0.19731	2.36013	0.0182685	0.111061
SBNO1	4.76122	1.00093	0.424308	2.35897	0.018326	0.111292
SREBF1	2.5157	-0.831699	0.352562	-2.35902	0.0183234	0.111292
TRAK1	5.40263	-0.516533	0.218989	-2.35872	0.018338	0.111306
WNT11	2.40591	-0.660821	0.280197	-2.35842	0.0183531	0.111338
S100A9	1.68501	-1.02168	0.433709	-2.35567	0.0184893	0.112105
AKNA	1.79543	-0.903551	0.383619	-2.35534	0.0185059	0.112146
TRAF4	4.10321	0.675564	0.286948	2.35431	0.0185571	0.112396
CNGA3	2.21389	-0.773342	0.328514	-2.35406	0.0185698	0.112414
APCDD1	1.98099	-0.806139	0.342537	-2.35344	0.0186007	0.112541
NACC1	3.61586	0.633108	0.269061	2.35303	0.0186213	0.112606
VGLL3	3.77595	0.622876	0.264779	2.35244	0.0186508	0.112687
C6orf136	2.22413	-0.779314	0.331289	-2.35237	0.0186544	0.112687
NEUROG1	1.65974	-0.882212	0.37527	-2.35087	0.0187295	0.113081
CBX2	3.17775	-0.888069	0.377827	-2.35046	0.0187501	0.113145
SYNPO	2.95738	0.672298	0.286076	2.35006	0.0187701	0.113206
SCX	3.34103	0.688712	0.293086	2.34986	0.0187805	0.113209
ACADVL	4.53103	0.603332	0.256937	2.34817	0.0188659	0.113604
SLC35E4	3.64123	0.60978	0.259673	2.34826	0.0188611	0.113604
HHAT	2.02173	-0.868192	0.36984	-2.34748	0.0189008	0.113754
AJM1	2.14033	-0.844386	0.359801	-2.34682	0.0189345	0.113897
SSBP1	3.01274	0.665734	0.283754	2.34616	0.0189678	0.114037
COMP	1.81892	-0.979505	0.41758	-2.34567	0.018993	0.114128
CCDC85C	2.14128	-0.881302	0.375813	-2.34506	0.0190242	0.114255
FBLN1	3.74229	0.626368	0.267249	2.34376	0.0190903	0.114592
GATAD2A	2.79946	0.691782	0.295213	2.34333	0.0191124	0.114665
MEX3D	2.93041	0.683552	0.291884	2.34186	0.0191879	0.115057
TRBC1	2.1321	-0.870208	0.371708	-2.34111	0.0192267	0.11518
ZNF738	2.33408	-0.993262	0.424277	-2.34107	0.0192287	0.11518
BHLHE40	2.94115	0.682213	0.291493	2.34041	0.0192623	0.115321
CDC6	1.73229	-0.877531	0.375183	-2.33894	0.0193386	0.115717
CMKLR1	2.22588	-0.843644	0.360776	-2.33842	0.0193657	0.115819
FAM83B	1.69521	-1.00587	0.430201	-2.33815	0.0193796	0.115841
HNRNPCL4	5.94556	0.572092	0.244827	2.33672	0.0194539	0.116224
TMX3	4.59658	0.569752	0.24408	2.33428	0.019581	0.116861
PRICKLE2	2.56951	-0.721587	0.309118	-2.33434	0.0195779	0.116861
LIFR	2.32474	-0.846496	0.362753	-2.33353	0.0196204	0.117035
DOT1L	5.17422	-0.468942	0.201027	-2.33274	0.019662	0.117165
OTOGL	1.71625	-0.954431	0.409149	-2.33272	0.0196627	0.117165
PSD	4.81225	0.534718	0.229384	2.3311	0.0197479	0.117612
NR1D1	1.84271	-0.891791	0.38261	-2.33081	0.0197635	0.117643
OGFOD3	3.22596	0.678857	0.291299	2.33045	0.0197824	0.117694
FLII	2.46753	0.709201	0.304355	2.33017	0.019797	0.11772
DENND3	1.96991	-0.804756	0.345444	-2.32963	0.0198258	0.117829
RASGRF1	1.99663	-0.857343	0.368128	-2.32893	0.019863	0.117989
HSPA9	11.4477	0.668788	0.287265	2.32812	0.0199057	0.118181
MED13	6.58389	0.465727	0.200082	2.32768	0.0199289	0.118236
PODN	2.1682	0.79145	0.340035	2.32756	0.0199357	0.118236
TECRL	2.23601	-0.906375	0.389544	-2.32676	0.019978	0.11837
CPLANE2	1.76338	-0.943719	0.405597	-2.32674	0.019979	0.11837
RTP5	1.60099	-1.29196	0.555794	-2.32453	0.0200971	0.119008
HOXA7	2.92327	-0.932274	0.401121	-2.32417	0.0201163	0.119059
CCR8	2.1884	-0.890962	0.383424	-2.3237	0.0201416	0.119148
DSTYK	5.12424	-0.534535	0.230125	-2.3228	0.0201897	0.11937
MAGEA3	32.9843	0.396814	0.170906	2.32183	0.0202423	0.119619
CDK11A	3.55984	0.64479	0.277876	2.32042	0.0203179	0.119942
ARSG	2.04749	-0.912351	0.393177	-2.32046	0.0203161	0.119942
GNAT2	3.29176	-0.696217	0.300092	-2.32001	0.0203402	0.120011
PRRG3	8.90569	0.41007	0.17685	2.31875	0.0204087	0.120353
C1orf87	1.75794	-0.994092	0.42878	-2.31842	0.0204266	0.120397
NUTM2G	3.95654	0.626345	0.270229	2.31783	0.0204585	0.120494
SMS	2.97286	0.658791	0.28427	2.31749	0.0204773	0.120494
MRPS27	2.35156	0.774865	0.334377	2.31734	0.0204854	0.120494
TIAF1	2.71754	-0.684415	0.295314	-2.31758	0.020472	0.120494
CAPZA1	2.83814	0.689586	0.297691	2.31645	0.0205339	0.120686
MYH15	1.53453	-1.05861	0.457017	-2.31635	0.0205391	0.120686
CDHR2	2.2903	-0.782297	0.337766	-2.31609	0.0205533	0.120707
BFAR	2.46072	0.714351	0.308541	2.31525	0.0205992	0.120914
ASPH	6.83218	0.487058	0.210474	2.3141	0.0206621	0.121159
JPH1	3.4707	-0.7881	0.340553	-2.31418	0.0206581	0.121159
DUSP8	1.98138	-0.862863	0.372955	-2.31358	0.0206905	0.121263
ZBTB37	2.01359	-0.833783	0.360568	-2.31242	0.0207548	0.121578
TMX4	2.67818	-0.657087	0.284235	-2.31177	0.0207901	0.121722
EIF3I	3.16101	0.648731	0.28067	2.31137	0.0208126	0.121791
MOB1A	4.50239	0.563745	0.244052	2.30994	0.0208913	0.122189
GABARAPL2	2.69364	0.687083	0.2977	2.30797	0.0210007	0.122766
DNMT3A	4.23415	0.520104	0.225494	2.30651	0.0210823	0.12318
KCNC1	2.14599	-0.803187	0.348287	-2.30611	0.0211045	0.123247
MGAT1	3.71749	0.564477	0.244823	2.30566	0.0211298	0.123268
FNDC4	1.88712	-1.02711	0.445444	-2.30581	0.0211212	0.123268
SERPINE1	3.36577	0.841773	0.36516	2.30522	0.0211544	0.123286
OPA1	2.52992	-0.713835	0.309643	-2.30535	0.021147	0.123286
ANGPTL1	2.90112	-0.728694	0.316266	-2.30405	0.0212196	0.123602
CNTRL	2.40326	-0.722529	0.313619	-2.30384	0.0212314	0.123608
IGF2BP3	3.05953	0.626795	0.272268	2.30212	0.0213283	0.124109
NFKBIL1	1.98209	-1.00624	0.437192	-2.30161	0.0213573	0.124214
H4C1	33.7104	0.351126	0.152621	2.30064	0.0214118	0.124468
GTF3C1	4.02604	0.69087	0.300379	2.29999	0.0214485	0.124545
NOTCH2	2.66689	0.761725	0.331185	2.3	0.0214484	0.124545
PLEKHM2	2.56568	0.656426	0.285424	2.29983	0.0214579	0.124545
MMP15	2.39342	-0.827401	0.359797	-2.29963	0.0214691	0.124547
ZCCHC24	3.32065	0.661014	0.287674	2.29779	0.0215738	0.125091
SELENOM	2.10205	0.808686	0.352022	2.29726	0.0216039	0.125202
RRAS2	3.31674	0.634811	0.276358	2.29706	0.0216151	0.125203
TOP2B	3.85761	0.574897	0.250555	2.29449	0.0217622	0.125927
GPC4	2.61156	-0.731017	0.318575	-2.29465	0.0217534	0.125927
PNLIPRP1	1.60379	-1.07695	0.469488	-2.29388	0.0217971	0.126065
FBLIM1	2.38253	0.730853	0.318668	2.29346	0.0218216	0.126143
ANKRD23	1.6759	-0.947417	0.413141	-2.2932	0.0218362	0.126164
RASSF10	2.04201	-0.882033	0.384685	-2.29287	0.0218555	0.126211
TPM3	18.9206	-0.462638	0.201818	-2.29235	0.0218854	0.12632
PGA3	1.50422	-0.968876	0.422714	-2.29204	0.0219035	0.126361
ZNF444	3.43724	0.578739	0.252545	2.29163	0.0219271	0.126433
FOXP4	2.38203	0.761552	0.332446	2.29075	0.0219777	0.12666
MUC5AC	2.70489	-0.677355	0.295724	-2.2905	0.0219922	0.12668
BRD4	6.49268	0.439001	0.191764	2.28928	0.0220628	0.127023
RHOXF2	1.52377	-1.02565	0.448092	-2.28892	0.0220842	0.127081
TTC28	2.1297	-0.795827	0.34776	-2.28844	0.022112	0.127178
MMP1	1.85568	-1.02637	0.448676	-2.28754	0.0221641	0.127413
P3H4	2.93539	0.640691	0.280128	2.28714	0.0221879	0.127486
OLR1	3.7231	-0.655105	0.286515	-2.28646	0.0222274	0.127648
GNL3	4.1704	0.549323	0.240274	2.28623	0.0222406	0.12766
MSC	2.44128	0.810189	0.354637	2.28456	0.0223388	0.128159
HS6ST2	6.2498	0.493628	0.216167	2.28355	0.022398	0.128434
RHPN2	3.20506	0.670855	0.293838	2.28308	0.0224256	0.12851
PGF	2.02755	0.789126	0.345662	2.28294	0.0224338	0.12851
H2AZ2	3.27631	0.660194	0.289353	2.28162	0.0225118	0.128892
FADS3	3.85254	-0.666243	0.292093	-2.28093	0.0225527	0.129061
PCM1	5.09184	0.512621	0.224878	2.27956	0.0226341	0.129462
NUDC	5.00527	0.488755	0.214465	2.27895	0.0226703	0.12954
APOOL	1.95652	-0.766725	0.336435	-2.27897	0.022669	0.12954
RAB15	2.55996	0.861329	0.377999	2.27866	0.0226876	0.129573
LPCAT4	2.81117	0.643458	0.28244	2.27822	0.0227137	0.129658
[truncated: 9,412 more rows]

## Sheet: MYOG_D5_vs_D10
Gene	baseMean	log2FoldChange	lfcSE	stat	pvalue	padj
MZT2B	9.30199	-4.11909	0.365886	-11.2578	2.1189e-29	4.96034e-26
MTRNR2L1	252.532	1.64081	0.205128	7.99896	1.25479e-15	1.46873e-12
GCNT2	7.31386	2.50176	0.400354	6.24888	4.13405e-10	3.22594e-07
ATP2A1	14.0149	1.61837	0.261568	6.18717	6.12527e-10	3.58482e-07
EPC1	14.8783	-1.42524	0.239447	-5.95223	2.64517e-09	1.07237e-06
HNRNPCL4	5.94556	-1.6386	0.276085	-5.93514	2.93599e-09	1.07237e-06
CDC25B	5.30189	-1.77914	0.300497	-5.92066	3.20656e-09	1.07237e-06
NYAP1	11.9429	-1.19562	0.207902	-5.75089	8.87725e-09	2.59771e-06
NBPF15	15.1451	-0.984873	0.172547	-5.70785	1.14414e-08	2.97603e-06
ATP5MC3	9.20043	2.06749	0.378682	5.45971	4.76907e-08	1.11015e-05
KREMEN2	13.3388	-1.61019	0.295786	-5.44377	5.21645e-08	1.11015e-05
ACTA1	129.796	1.59327	0.295941	5.38375	7.29488e-08	1.42311e-05
MAGEA3	32.9843	-1.02553	0.198608	-5.16356	2.42291e-07	4.3631e-05
PAM16	9.6087	1.4994	0.291771	5.13895	2.76272e-07	4.61966e-05
LYRM2	76.4645	-1.2322	0.24715	-4.98566	6.17522e-07	9.63746e-05
RELL1	7.15395	-1.28655	0.260649	-4.93594	7.97639e-07	0.000116705
PHAX	26.6455	-1.05065	0.218225	-4.81453	1.47548e-06	0.000203183
HNRNPCL3	21.3872	-0.965164	0.204442	-4.72098	2.34715e-06	0.00030526
C4orf46	47.0391	-1.00829	0.21475	-4.69517	2.66388e-06	0.000311808
SEMA6A	7.6465	-1.19232	0.253804	-4.69778	2.63003e-06	0.000311808
RPL14	12.944	1.69058	0.365085	4.63064	3.64538e-06	0.000406373
FHL1	13.3982	1.53506	0.337622	4.54667	5.45015e-06	0.000579946
SDCBP	4.86614	-1.36072	0.299919	-4.53696	5.70719e-06	0.000580893
CDKN1C	11.9983	-1.25183	0.276687	-4.52436	6.05774e-06	0.000590882
MYLK4	11.6904	-1.15191	0.256034	-4.49907	6.82502e-06	0.000639095
NPIPA1	11.0091	-1.13359	0.25722	-4.40709	1.0477e-05	0.000943335
TMEM213	20.2557	-0.830656	0.193349	-4.29614	1.73794e-05	0.00145304
HNRNPH3	9.33297	-0.980368	0.228025	-4.29939	1.71266e-05	0.00145304
TEX13B	4.12608	-1.33038	0.310619	-4.28301	1.84384e-05	0.00148842
AK8	47.5629	1.45771	0.342155	4.26038	2.04079e-05	0.0015925
IL32	11.2648	-1.10392	0.262012	-4.21326	2.51711e-05	0.00184142
FGD3	14.7372	1.43235	0.339932	4.21362	2.51306e-05	0.00184142
PTP4A3	14.9527	-0.832132	0.199234	-4.17666	2.95819e-05	0.00209852
TMA7	34.8126	0.926812	0.222925	4.15751	3.21737e-05	0.00221525
RAD23B	24.2318	-0.919831	0.22264	-4.13148	3.60436e-05	0.00228049
PKMYT1	11.6456	1.12068	0.270974	4.13575	3.53799e-05	0.00228049
PLPP4	7.066	-1.07232	0.259195	-4.13712	3.51698e-05	0.00228049
MAMDC2	7.76085	-1.17386	0.284859	-4.12084	3.77487e-05	0.00232552
ZNF768	8.23804	-0.923645	0.2279	-4.05286	5.05962e-05	0.00288892
GATA2	8.16794	-0.965195	0.23793	-4.05663	4.97861e-05	0.00288892
TATDN1	4.53538	1.74175	0.42942	4.05605	4.99094e-05	0.00288892
SVIL	7.89584	-1.0768	0.266498	-4.04054	5.33274e-05	0.00297237
MALRD1	13.2916	-1.01755	0.253611	-4.01224	6.01461e-05	0.00327446
ART1	15.5867	1.00608	0.252897	3.97823	6.94292e-05	0.00369395
PNLIPRP3	11.2032	1.15661	0.296713	3.89806	9.6967e-05	0.00504444
FXR1	8.05445	1.0858	0.279865	3.87974	0.000104569	0.00532167
ACTN4	11.9318	0.944683	0.244598	3.86218	0.000112378	0.0055974
MEGF8	17.0186	-0.758172	0.197097	-3.8467	0.00011972	0.0057197
CTNNB1	8.65105	-1.03522	0.268915	-3.84961	0.000118307	0.0057197
DCLK3	9.44016	1.51081	0.394354	3.83111	0.000127567	0.0059727
SIGMAR1	15.7194	-0.76073	0.202512	-3.75646	0.000172333	0.00791043
DCN	7.74576	-1.01185	0.270417	-3.74183	0.000182687	0.00822441
ZNF506	48.0454	-0.870409	0.233303	-3.73081	0.000190867	0.00843057
HSPA8	11.1829	-0.875388	0.236705	-3.69823	0.000217111	0.00941216
RNF113A	13.9681	-0.794421	0.21649	-3.66954	0.000242983	0.0103423
RGS3	5.92096	-1.00969	0.276012	-3.65814	0.000254055	0.0106204
SNURF	6.63531	1.09741	0.301218	3.64325	0.000269215	0.0110567
DDX5	12.3541	-0.673544	0.185763	-3.62582	0.000288047	0.011348
EFHD2	10.916	-1.29109	0.356328	-3.62332	0.00029085	0.011348
CCNG2	6.09814	-0.95388	0.263113	-3.62536	0.000288556	0.011348
ARRDC1	20.2994	-0.833247	0.23266	-3.58139	0.000341775	0.0129048
WNT9A	10.796	-0.912296	0.254619	-3.58299	0.000339685	0.0129048
DUX5	65.7261	-0.835698	0.23393	-3.57242	0.000353696	0.0131429
SEMA3C	5.72763	-0.971559	0.272934	-3.55968	0.000371307	0.013464
FST	5.25341	-1.09642	0.308167	-3.55789	0.000373842	0.013464
AMOTL2	7.58336	1.16701	0.328765	3.54968	0.0003857	0.0136807
KRTAP10-10	12.5038	-0.673909	0.190862	-3.53087	0.000414201	0.0144723
ZNF106	12.1849	-0.878834	0.250104	-3.51387	0.000441629	0.0148544
RALA	5.29169	-0.958228	0.272817	-3.51234	0.000444172	0.0148544
FADS3	3.85254	1.72303	0.490264	3.51448	0.000440613	0.0148544
CTSS	4.16119	1.57666	0.45015	3.50253	0.000460864	0.0151955
PFDN5	8.92306	1.21177	0.347112	3.49101	0.000481206	0.0156459
COL5A2	9.42009	-0.979109	0.281669	-3.4761	0.000508762	0.0163152
TRIM6	4.40158	-1.00888	0.291115	-3.46559	0.000529074	0.0165142
SIK1	4.70362	1.80761	0.521548	3.46585	0.000528556	0.0165142
SEMA6B	7.7137	-1.05359	0.304831	-3.45632	0.000547615	0.016868
MTRNR2L10	300.421	0.764535	0.223124	3.4265	0.000611417	0.0185887
VASH2	6.89345	-0.895756	0.262358	-3.41425	0.000639577	0.0191955
SLC39A3	7.42249	-0.911091	0.267551	-3.4053	0.000660921	0.0195662
C4orf3	5.55508	-0.971905	0.285676	-3.40212	0.000668643	0.0195662
APOBEC3A_B	57.389	-0.708556	0.208831	-3.39297	0.000691396	0.0199822
MICALL2	225.853	1.02119	0.301525	3.38676	0.000707232	0.0201906
CDK15	8.50219	-0.935947	0.277899	-3.36795	0.000757306	0.0213597
MEPCE	46.4571	-0.629245	0.18785	-3.34972	0.000808935	0.02202
KIR3DL1	7.25431	-0.855001	0.255078	-3.35193	0.000802513	0.02202
FRMD7	4.0314	1.4753	0.44017	3.35165	0.000803301	0.02202
PLAUR	5.15387	1.22074	0.36644	3.33135	0.000864263	0.0232556
HMGN1	8.29003	-0.873675	0.26288	-3.32347	0.000889053	0.0236155
TPPP3	6.50901	-1.30145	0.392284	-3.31761	0.0009079	0.0236155
AVPR1B	4.39903	-1.03477	0.311851	-3.31815	0.000906147	0.0236155
TASOR2	23.6706	-0.749139	0.226285	-3.3106	0.000930956	0.0239491
POSTN	6.37507	1.12093	0.339062	3.30598	0.000946449	0.024083
TPRA1	6.74115	1.00434	0.304565	3.29761	0.000975125	0.0245459
JAM2	5.669	-0.807625	0.245547	-3.28908	0.00100516	0.0250327
FSTL1	9.26959	-0.958626	0.29327	-3.26875	0.00108025	0.0266197
ANKRD36	16.7305	-0.646108	0.197986	-3.2634	0.00110085	0.0268447
TPM2	65.8984	0.815954	0.250366	3.25904	0.0011179	0.0269795
PRDM5	12.5914	-0.780479	0.240027	-3.25163	0.00114744	0.0274098
RNF167	16.5761	-0.639865	0.19905	-3.21459	0.00130633	0.0308901
TRAF3IP1	9.40544	0.818571	0.255546	3.20322	0.00135901	0.031587
RAPSN	10.1287	-0.716697	0.223799	-3.20242	0.00136279	0.031587
TMEM50B	21.8254	-0.627637	0.197811	-3.17292	0.00150916	0.0343593
MARCKSL1	10.3936	-0.843159	0.265778	-3.17242	0.00151175	0.0343593
LAMC1	8.12455	-0.831721	0.262575	-3.16756	0.00153723	0.0346025
SRL	17.662	0.87031	0.279351	3.11547	0.0018365	0.0409453
CCDC88B	33.2489	-0.659922	0.212024	-3.11249	0.00185519	0.0409716
CDC37	8.51672	-0.813313	0.261896	-3.10548	0.0018997	0.0415626
ZBTB7B	10.071	-0.733203	0.236993	-3.09378	0.00197626	0.0428373
ANKRD1	5.48271	1.18801	0.385207	3.08409	0.00204175	0.0438509
ZNF470	17.8626	-0.739037	0.239993	-3.0794	0.00207415	0.0440431
RAB39A	8.23319	-0.77506	0.251858	-3.07737	0.00208833	0.0440431
TUBB6	12.3568	-0.83825	0.273986	-3.05947	0.00221732	0.0463459
TUSC2	54.4373	-0.602718	0.197556	-3.05087	0.00228176	0.0468562
SC5D	4.82474	-0.836586	0.274095	-3.05218	0.00227186	0.0468562
MYH7B	9.26632	1.0166	0.334139	3.04246	0.00234653	0.0477671
GLIPR2	4.06514	-0.996517	0.329024	-3.02871	0.00245604	0.0495654
HMGN2	11.3774	0.830784	0.274558	3.0259	0.00247894	0.0495999
NDST1	5.09279	-0.963719	0.319013	-3.02094	0.00251989	0.0499921
MAGED1	12.4208	-0.688907	0.228392	-3.01634	0.00255844	0.0501562
HSP90B1	8.73907	-0.773539	0.256576	-3.01486	0.00257102	0.0501562
RPL4	20.8281	0.883682	0.293775	3.00802	0.00262953	0.0504568
KANK3	11.1659	-0.785336	0.261048	-3.0084	0.0026263	0.0504568
ETV3	50.3919	-0.525225	0.175078	-2.99995	0.00270027	0.0509785
MSI2	3.90699	1.27561	0.425038	3.00117	0.00268941	0.0509785
ZNF500	10.8463	-0.610262	0.204385	-2.98585	0.00282795	0.0525414
ALDOB	5.79218	-0.825571	0.27628	-2.98817	0.0028065	0.0525414
FABP1	30.3835	-0.703107	0.236978	-2.96697	0.00300754	0.0541588
VAMP8	20.424	-0.623802	0.210162	-2.96819	0.00299557	0.0541588
CARD11	13.9206	0.580647	0.195694	2.96711	0.00300612	0.0541588
FAM3C	19.0291	-0.572829	0.192702	-2.97262	0.0029527	0.0541588
EXOSC6	7.36002	-0.78632	0.266419	-2.95144	0.00316295	0.0560944
DVL3	4.61697	1.18177	0.400187	2.95303	0.00314668	0.0560944
PCBP1	12.845	-0.664825	0.226652	-2.93325	0.00335437	0.059042
TET3	92.5783	-0.503325	0.172359	-2.92022	0.00349785	0.0608614
GNAI3	4.07704	1.18697	0.406614	2.91916	0.00350973	0.0608614
TNNC2	31.8929	0.783437	0.269622	2.90568	0.0036645	0.061239
SULT1C4	18.1477	-0.600304	0.206639	-2.90508	0.00367156	0.061239
CFL2	11.4395	0.800773	0.275302	2.90871	0.00362922	0.061239
TCAP	4.30991	1.25089	0.432749	2.89057	0.00384542	0.061239
DDB1	8.5087	0.820074	0.283682	2.89082	0.00384237	0.061239
OVOL1	9.31591	-0.656477	0.226121	-2.90321	0.00369363	0.061239
LGMN	4.18411	1.32231	0.457437	2.89068	0.00384404	0.061239
TSNAX	4.3468	1.08648	0.374519	2.901	0.00371975	0.061239
SMIM19	5.10784	-0.885491	0.305923	-2.89449	0.00379778	0.061239
TSPAN9	4.80246	-0.864774	0.297914	-2.90277	0.00369883	0.061239
ZDHHC11	5.02955	-0.839122	0.289914	-2.89438	0.00379907	0.061239
SLC36A1	4.33205	-0.833365	0.287154	-2.90216	0.00370603	0.061239
RPL23	9.1885	0.894207	0.311813	2.86777	0.00413382	0.065387
NBL1	7.70053	-0.720702	0.251498	-2.86563	0.00416176	0.0653871
CNBP	5.18709	1.01515	0.354685	2.86213	0.0042081	0.0656745
PYGM	5.43515	0.94373	0.330671	2.85398	0.00431747	0.0668421
C5orf51	4.84166	-0.889675	0.311912	-2.85233	0.00434003	0.0668421
OLFML3	13.3066	-0.673791	0.237256	-2.83993	0.00451235	0.0688541
DMWD	5.54403	-0.796153	0.280462	-2.83872	0.00452949	0.0688541
STOX2	7.4483	-0.702347	0.24858	-2.82543	0.00472166	0.0690838
TM9SF2	4.6915	1.04212	0.368305	2.8295	0.00466203	0.0690838
SMCP	5.60539	-0.957766	0.33883	-2.82668	0.00470329	0.0690838
CTNNBL1	4.99858	-0.781393	0.276308	-2.82798	0.00468432	0.0690838
FAM120A	4.09438	1.07869	0.380819	2.83255	0.00461788	0.0690838
SHANK1	3.90205	1.12118	0.396269	2.82935	0.00466426	0.0690838
NFAM1	17.0321	-0.57658	0.20438	-2.82111	0.00478575	0.069157
SFPQ	12.9104	0.700275	0.248125	2.82227	0.00476846	0.069157
SSC4D	5.51712	0.919652	0.32644	2.81721	0.00484427	0.0695733
CLK1	4.06101	1.09305	0.3891	2.80917	0.00496701	0.0709011
R3HDM4	38.8798	0.695028	0.248218	2.80007	0.00510912	0.0719671
DDX50	10.0571	-0.660491	0.236015	-2.79851	0.00513392	0.0719671
ANXA2	9.69834	-0.785922	0.28061	-2.80076	0.00509818	0.0719671
BSG	5.02759	-1.09659	0.393472	-2.78696	0.00532048	0.0741384
CDC42	5.80545	1.02558	0.369233	2.77759	0.00547628	0.0758579
PATE2	4.29162	-0.875462	0.316095	-2.76962	0.0056122	0.0768314
PSG1	4.65555	1.47765	0.533204	2.77127	0.00558376	0.0768314
PEG10	12.4072	-0.839256	0.303717	-2.76328	0.00572238	0.076989
CFAP410	4.43453	-0.871265	0.315105	-2.765	0.00569229	0.076989
RAD23A	5.07794	1.00581	0.363955	2.76356	0.00571755	0.076989
TRAF4	4.10321	-0.968457	0.351213	-2.75746	0.00582517	0.0779241
ITM2A	4.33465	1.07277	0.391274	2.74174	0.00611145	0.0803712
CLDN11	4.39228	-0.814478	0.296724	-2.7449	0.00605292	0.0803712
CLSTN2	5.41801	-0.904827	0.330271	-2.73964	0.00615056	0.0803712
PLPP7	4.35443	-0.837327	0.305438	-2.7414	0.00611777	0.0803712
CREB3	4.38189	-0.846533	0.309169	-2.73809	0.00617976	0.0803712
MAP4	8.9235	-0.721101	0.263661	-2.73496	0.00623885	0.0806915
PDCD4	61.9373	-0.547215	0.200227	-2.73297	0.00627661	0.0807338
SIGIRR	17.6343	-0.496797	0.181993	-2.72976	0.00633796	0.0810774
KLF16	4.03877	1.05407	0.386437	2.72767	0.00637827	0.0811497
LDHB	8.19591	-0.695003	0.255063	-2.72483	0.00643341	0.0814087
RASSF4	13.8381	-0.776214	0.285613	-2.71771	0.00657354	0.081997
CIRBP	6.13961	-0.798968	0.294048	-2.71713	0.00658498	0.081997
NKX2-5	5.53998	0.940851	0.346075	2.71863	0.00655528	0.081997
SSRP1	9.15016	-0.61299	0.225763	-2.7152	0.00662365	0.0820421
GNAS	22.1678	0.727063	0.268035	2.71257	0.00667645	0.0822609
MAZ	20.678	-0.50261	0.186122	-2.70044	0.00692476	0.0848736
C1orf198	3.84562	-0.914705	0.340451	-2.68675	0.00721517	0.0879725
PGM5	5.09109	-0.750905	0.279688	-2.6848	0.00725736	0.0880284
MYH8	18.1247	0.695272	0.259332	2.68101	0.00734	0.0881804
ARRB2	8.29796	-0.629612	0.234862	-2.68077	0.00734523	0.0881804
MYBPC1	8.24552	0.707978	0.265826	2.66331	0.00773752	0.0919469
UPF3A	4.02363	-0.812174	0.304776	-2.66482	0.00770295	0.0919469
CYC1	4.63789	0.939804	0.353832	2.65607	0.00790561	0.0933382
B3GAT3	5.48423	-0.850957	0.320529	-2.65485	0.00793435	0.0933382
RASL10A	8.72399	-0.873545	0.329416	-2.6518	0.00800647	0.0937158
KAT7	5.98667	-0.724415	0.273722	-2.64654	0.00813199	0.0947114
CDKN1A	14.73	-0.794686	0.301703	-2.634	0.00843861	0.097796
DZIP1L	6.12764	0.809417	0.307836	2.62937	0.0085542	0.0986472
PDE7A	44.8173	-0.503605	0.191689	-2.62719	0.00860926	0.0987955
SBDS	5.09825	-0.826881	0.315032	-2.62475	0.00867115	0.0990203
RPL36A	7.92879	-0.870446	0.332043	-2.62148	0.00875481	0.0994903
SLC25A19	7.41482	-0.757632	0.289821	-2.61414	0.00894532	0.0996667
HSPG2	8.26413	-0.610251	0.233348	-2.6152	0.00891765	0.0996667
TMEM126B	7.50996	-0.66772	0.255487	-2.61352	0.0089615	0.0996667
B4GALT2	4.54276	1.01338	0.388109	2.61108	0.00902577	0.0996667
LAMA5	5.69732	-0.930793	0.356358	-2.61196	0.0090025	0.0996667
SNX18	4.13613	-0.788583	0.301222	-2.61795	0.00884596	0.0996667
GJC3	6.99197	0.793543	0.304335	2.60747	0.00912141	0.0997814
PLXNB2	6.34155	-0.753993	0.289051	-2.60851	0.00909369	0.0997814
TGFB3	4.7352	0.898607	0.345148	2.60355	0.00922651	0.100462
MEF2D	5.19558	0.905559	0.348947	2.59512	0.00945588	0.102482
LRRN1	18.5817	-0.625947	0.241995	-2.58661	0.00969244	0.104562
ZNF587B	4.35294	-0.755228	0.2923	-2.58374	0.0097736	0.104954
TMSB10	28.7009	0.748742	0.290611	2.57645	0.00998218	0.106219
HNRNPH1	8.9404	-1.06657	0.413794	-2.57755	0.0099503	0.106219
PSMA7	3.7673	-0.89712	0.348567	-2.57374	0.0100606	0.106569
TTN	41.6243	-0.64846	0.252241	-2.5708	0.0101465	0.106995
MACF1	15.4059	-0.513365	0.199976	-2.56713	0.0102544	0.107648
MEGF10	8.39677	-0.755565	0.294649	-2.56429	0.0103387	0.108049
ALDOA	40.2349	0.675435	0.263765	2.56074	0.0104449	0.108192
TMEM95	4.19969	0.928541	0.362453	2.56182	0.0104124	0.108192
RUNX1	5.10607	1.09618	0.429343	2.55315	0.0106752	0.110091
MAPKBP1	15.5474	-0.589684	0.231215	-2.55037	0.0107608	0.110269
MORF4L1	10.8535	-0.649514	0.254758	-2.54954	0.0107866	0.110269
CTBP1	3.82609	1.05949	0.415932	2.54726	0.0108573	0.110508
BIRC5	26.0648	-0.558766	0.219634	-2.54407	0.0109568	0.11056
ACTN1	7.69179	0.761369	0.299249	2.54427	0.0109507	0.11056
RHOC	6.11799	1.44246	0.56797	2.53968	0.0110954	0.111478
TACC2	6.02748	-0.73151	0.289742	-2.5247	0.0115799	0.115848
TNIK	7.13191	0.783196	0.311184	2.51682	0.0118419	0.117965
DDX17	25.8521	-0.575353	0.229625	-2.50562	0.0122237	0.120741
ZHX3	14.6181	-0.553169	0.220745	-2.50591	0.0122135	0.120741
SORBS2	4.30253	-0.710975	0.284242	-2.5013	0.0123737	0.121709
MYL6B	25.887	-0.524585	0.210121	-2.49658	0.0125396	0.122314
ATOH8	3.90977	-0.85449	0.34209	-2.49785	0.0124947	0.122314
HCN4	4.26495	-0.783057	0.313952	-2.49419	0.0126245	0.12263
TPM1	25.1417	0.720187	0.290745	2.47704	0.0132477	0.123162
ZFP1	12.5843	0.587615	0.23684	2.48107	0.013099	0.123162
AK1	9.06096	0.743545	0.300454	2.47474	0.0133335	0.123162
RPLP2	13.0836	0.854308	0.34429	2.48136	0.0130881	0.123162
GGA3	10.0261	0.625986	0.252141	2.48268	0.0130398	0.123162
TRIM66	9.87173	-0.563527	0.227287	-2.47936	0.0131617	0.123162
BRD4	6.49268	0.763333	0.307765	2.48024	0.0131292	0.123162
PRRC1	5.21284	-0.808771	0.325374	-2.48566	0.012931	0.123162
FOSL2	6.7114	0.930841	0.375923	2.47615	0.0132809	0.123162
DIO3	6.23443	0.768359	0.310581	2.47394	0.0133632	0.123162
NCS1	5.41696	-0.799485	0.322863	-2.47624	0.0132776	0.123162
CHD3	4.86356	-0.824418	0.331626	-2.48599	0.0129193	0.123162
SOX11	4.35366	-0.732583	0.295872	-2.47601	0.0132858	0.123162
TOR1AIP2	8.25857	-0.55873	0.226118	-2.47097	0.0134748	0.123704
TMEM30A	27.8622	-0.495692	0.201292	-2.46255	0.0137952	0.12515
ADAM15	16.4287	-0.809734	0.328992	-2.46126	0.013845	0.12515
AKR1A1	5.94238	-0.745102	0.302736	-2.46123	0.0138462	0.12515
WDR6	3.74186	-0.817466	0.332003	-2.46223	0.0138077	0.12515
ARHGEF5	3.80481	-0.778659	0.317228	-2.45457	0.0141052	0.126715
REEP2	4.15336	0.859245	0.35014	2.454	0.0141276	0.126715
CCND2	7.56043	-0.683798	0.279276	-2.44846	0.0143467	0.127306
CCS	6.4875	-0.626052	0.256383	-2.44186	0.0146116	0.127306
TIPIN	8.08849	-0.625951	0.256098	-2.44418	0.014518	0.127306
MGRN1	4.34213	0.939871	0.384676	2.44328	0.0145544	0.127306
LASP1	4.90789	-0.800974	0.327831	-2.44325	0.0145555	0.127306
ANTXR2	5.53844	-0.65723	0.269197	-2.44145	0.0146285	0.127306
FAM180B	6.16431	-0.709579	0.290162	-2.44546	0.0144668	0.127306
EPB41L3	5.22572	-0.755207	0.309008	-2.44397	0.0145267	0.127306
SLFNL1	14.3185	-0.564425	0.231778	-2.43519	0.0148839	0.128775
HNRNPL	10.8546	-0.56575	0.232377	-2.43462	0.0149073	0.128775
NEGR1	11.0601	-0.538768	0.22165	-2.43072	0.0150689	0.128885
CTSA	5.54775	0.859344	0.353592	2.43033	0.0150852	0.128885
TRIM41	4.33962	-0.813302	0.334493	-2.43145	0.0150387	0.128885
TOMM34	22.486	-0.560177	0.231005	-2.42496	0.01531	0.128924
CHRNA1	16.0344	-0.551826	0.227437	-2.42628	0.0152545	0.128924
DCAF1	5.68094	0.777075	0.320358	2.42564	0.0152813	0.128924
NBPF26	4.46664	1.00171	0.412914	2.42596	0.0152681	0.128924
PAX4	4.55777	-0.717439	0.296368	-2.42077	0.0154877	0.129952
FKBP1A	5.10111	-0.880827	0.364333	-2.41765	0.0156213	0.130605
TUBB4B	12.604	-0.625616	0.259335	-2.41239	0.0158484	0.132032
NDRG2	4.42816	0.914408	0.381718	2.39551	0.0165973	0.132205
MYOZ1	4.47761	0.836336	0.34875	2.3981	0.0164805	0.132205
SLC38A2	9.14084	0.696619	0.290594	2.39722	0.0165198	0.132205
NPFF	10.7049	-0.563439	0.234585	-2.40185	0.0163123	0.132205
GNAI2	6.5664	0.866059	0.359866	2.40661	0.0161012	0.132205
PSMD3	6.23503	0.71336	0.297501	2.39785	0.0164918	0.132205
SPANXA1	7.62657	0.615054	0.255624	2.40609	0.0161243	0.132205
SERF2	5.62199	-0.83992	0.350151	-2.39874	0.0164518	0.132205
JPH2	6.77524	-0.590719	0.246608	-2.39538	0.0166032	0.132205
MOB1A	4.50239	-0.74143	0.308946	-2.39987	0.0164007	0.132205
SUGP2	4.23186	-0.757414	0.316058	-2.39644	0.0165553	0.132205
RETNLB	4.92369	-0.730184	0.304396	-2.3988	0.0164491	0.132205
PLCE1	4.68775	0.807169	0.336583	2.39813	0.0164791	0.132205
MYADM	15.0287	-0.680157	0.284707	-2.38897	0.0168955	0.134076
VGLL3	3.77595	-0.796596	0.334577	-2.3809	0.0172702	0.136586
ZNF680	12.6165	0.598145	0.251913	2.37441	0.0175769	0.136651
EIF3L	6.82224	0.906854	0.381646	2.37616	0.0174937	0.136651
RPS15A	6.59358	-0.789351	0.332224	-2.37596	0.0175034	0.136651
MICAL1	6.35234	-0.708311	0.298488	-2.37299	0.0176446	0.136651
GPAT4	4.30667	0.844675	0.356222	2.37121	0.01773	0.136651
MCAM	4.02042	-0.748018	0.31526	-2.3727	0.0176585	0.136651
SPPL2B	4.49514	-0.792063	0.334078	-2.37089	0.0177453	0.136651
PYGB	3.78911	-0.903248	0.380559	-2.37348	0.0176213	0.136651
CCN2	6.46422	-0.760737	0.321357	-2.36727	0.01792	0.137544
U2AF1	6.14164	-0.721172	0.304972	-2.36472	0.0180439	0.138041
PNISR	6.86004	-0.59779	0.252946	-2.36331	0.0181124	0.138115
MEF2C	7.496	0.718063	0.304962	2.3546	0.0185427	0.138685
BGN	8.78553	1.07318	0.455399	2.35657	0.0184446	0.138685
ARF1	6.96415	-0.711674	0.302072	-2.35597	0.0184742	0.138685
FGFRL1	4.68356	-0.678338	0.287997	-2.35537	0.0185045	0.138685
ASAP3	5.5274	1.09422	0.463991	2.35828	0.0183598	0.138685
KCNA10	4.03034	-1	0.423797	-2.35962	0.0182935	0.138685
LAMA4	4.052	0.980041	0.416454	2.3533	0.0186077	0.138728
GAL3ST2	21.1221	-0.516509	0.220193	-2.34571	0.0189909	0.140139
BTBD6	12.7613	-0.597074	0.254757	-2.3437	0.0190937	0.140139
RUNX3	9.53823	0.615936	0.262773	2.34398	0.019079	0.140139
ARID1A	6.30389	-0.615849	0.262831	-2.34314	0.0191222	0.140139
SMYD1	4.28874	-0.797756	0.339794	-2.34776	0.0188866	0.140139
ITGA6	7.21469	1.06066	0.453019	2.34132	0.0192159	0.140139
HMG20B	4.0533	-0.773494	0.330235	-2.34225	0.0191677	0.140139
DUX4	43.0264	-0.540456	0.231583	-2.33375	0.0196089	0.141883
FUS	13.6944	-0.54738	0.234931	-2.32996	0.0198081	0.141883
CASP2	11.0874	-0.535877	0.229847	-2.33145	0.0197298	0.141883
NR1H2	7.0839	-0.644715	0.276251	-2.3338	0.0196062	0.141883
CSNK1D	6.12188	0.705557	0.302845	2.32976	0.0198188	0.141883
ZNF423	3.85406	-0.747026	0.320206	-2.33295	0.0196507	0.141883
ZFP36L1	10.1159	0.616569	0.264892	2.32762	0.0199322	0.14226
MYH1	21.1762	0.670964	0.289651	2.31646	0.0205334	0.143489
BIN1	21.4881	0.550118	0.237077	2.32042	0.0203184	0.143489
ATP2A3	6.44317	0.732858	0.316124	2.31826	0.0204352	0.143489
MPZL1	10.5981	-0.520447	0.224171	-2.32165	0.0202518	0.143489
COL6A3	7.51287	0.935594	0.403578	2.31825	0.0204358	0.143489
MAP3K13	7.86714	-0.527094	0.227436	-2.31755	0.0204739	0.143489
SRGAP3	4.00144	-0.739719	0.319248	-2.31707	0.0205001	0.143489
UQCRC2	6.15882	-0.637073	0.275322	-2.31392	0.0206722	0.143601
CAVIN4	7.15586	0.694073	0.299844	2.31478	0.0206251	0.143601
NAA15	4.13435	0.801566	0.346954	2.3103	0.0208717	0.144558
NCOA1	6.28833	-0.624081	0.270748	-2.30503	0.0211651	0.146158
USE1	3.9254	0.844767	0.366878	2.30258	0.0213025	0.146674
CCDC86	7.7331	0.623192	0.270904	2.30042	0.0214245	0.147081
ZNF723	33.5497	-0.622361	0.271266	-2.29428	0.0217742	0.149045
COL1A2	209.881	-0.591411	0.2583	-2.28962	0.0220432	0.150446
TSPAN33	5.22439	-0.735817	0.321786	-2.28667	0.0222154	0.151181
KCNH3	14.3178	-0.456121	0.200427	-2.27574	0.0228613	0.154733
PXN	9.6868	-0.565492	0.248623	-2.2745	0.022936	0.154733
ATP1A1	10.1918	-0.590937	0.259935	-2.27341	0.0230017	0.154733
SGCD	5.33443	-0.620957	0.272976	-2.27477	0.0229197	0.154733
MUSTN1	5.6391	0.712023	0.313466	2.27145	0.0231196	0.15508
NOMO3	5.51173	-0.671331	0.295853	-2.26914	0.02326	0.155576
CCDC8	10.9456	-0.636993	0.28167	-2.26149	0.0237292	0.157366
PDLIM4	9.46359	-0.624222	0.275853	-2.26288	0.0236431	0.157366
UBL3	7.17249	-0.688507	0.30441	-2.26177	0.0237116	0.157366
MEST	8.38347	0.831098	0.367692	2.26031	0.0238019	0.157402
UBB	9.29129	0.815318	0.360916	2.25902	0.023882	0.157487
ATP1B3	7.5487	-0.606726	0.268879	-2.2565	0.0240391	0.158077
TTC31	19.3711	0.662792	0.294059	2.25395	0.0241996	0.158687
DTNBP1	4.89512	-0.751649	0.333757	-2.25208	0.024317	0.159011
TLCD3B	4.79581	-0.675946	0.300757	-2.24748	0.0246092	0.160474
TEX9	7.60701	0.649077	0.28895	2.24633	0.0246827	0.160506
CDC42EP3	4.53913	-0.71226	0.317401	-2.24404	0.0248298	0.161016
ARSF	4.44207	-0.664033	0.296286	-2.24119	0.0250139	0.161761
JPT1	10.4778	-0.583515	0.26067	-2.23852	0.0251869	0.162431
SENP3	8.40393	-0.640739	0.286954	-2.2329	0.0255558	0.164358
RPS21	6.87178	0.958397	0.430398	2.22677	0.0259626	0.165761
TUBB2A	5.52849	-0.643332	0.289366	-2.22325	0.0261989	0.165761
JAM3	6.70636	-0.632518	0.284451	-2.22365	0.0261723	0.165761
RBP1	4.37043	-0.764614	0.343399	-2.22661	0.0259736	0.165761
EFR3A	3.98844	0.939026	0.422122	2.22454	0.0261122	0.165761
TSPAN11	3.96908	-0.698536	0.31404	-2.22435	0.0261247	0.165761
FNDC5	19.9732	-0.579376	0.261077	-2.21918	0.0264748	0.166873
COL13A1	10.7922	-0.543807	0.245307	-2.21685	0.0266336	0.166873
PGPEP1	5.55745	0.708528	0.319666	2.21646	0.0266598	0.166873
NEDD8	5.00493	0.866699	0.390673	2.21847	0.0265226	0.166873
KLHDC8B	6.73396	0.616542	0.278427	2.21438	0.0268027	0.16732
PET117	7.03806	-0.552592	0.249738	-2.21269	0.0269191	0.1676
NPHS2	4.40342	-0.665026	0.302099	-2.20135	0.0277113	0.172075
USF2	3.96356	-0.750184	0.341305	-2.19799	0.0279501	0.173098
LDB3	10.9387	0.479316	0.218723	2.19143	0.0284207	0.174627
TNC	11.6749	-0.636005	0.290052	-2.19272	0.0283272	0.174627
SPC24	4.26786	0.772794	0.352583	2.19181	0.0283934	0.174627
WNT10A	8.63779	-0.526177	0.241492	-2.17886	0.0293422	0.179817
NPLOC4	4.46945	-0.699819	0.321355	-2.17771	0.0294275	0.179869
CANX	8.13772	-0.584158	0.269179	-2.17014	0.029996	0.181547
CFL1	9.03817	-0.598129	0.275545	-2.17071	0.0299528	0.181547
MIDEAS	6.58071	-0.661137	0.304289	-2.17273	0.0298009	0.181547
IFITM3	4.09546	0.884557	0.407643	2.16993	0.0300123	0.181547
TESC	20.1121	-0.452015	0.209365	-2.15898	0.0308521	0.184718
RPS2	16.4216	0.774913	0.358735	2.16013	0.030763	0.184718
EIF4H	9.80415	0.633538	0.293141	2.1612	0.0306796	0.184718
CCT2	4.35131	-0.648379	0.300182	-2.15995	0.0307766	0.184718
YBX1	8.58892	0.656998	0.304576	2.15709	0.0309983	0.18512
ATP1B1	9.12954	0.647192	0.301433	2.14705	0.0317892	0.18888
ADD1	4.22971	-0.651078	0.303204	-2.14732	0.0317674	0.18888
ALG12	11.1292	0.559003	0.260586	2.14518	0.0319386	0.1889
SIGLEC16	16.1002	-0.401618	0.187236	-2.14498	0.0319541	0.1889
SMIM40	14.4102	-0.513353	0.239897	-2.13989	0.0323638	0.190361
FLYWCH2	6.02324	-0.666475	0.311379	-2.1404	0.0323227	0.190361
CKM	14.127	0.600686	0.281002	2.13765	0.0325449	0.190469
APMAP	4.51132	-0.632723	0.295882	-2.13843	0.0324819	0.190469
RAB19	6.42019	-0.619405	0.290077	-2.13532	0.0327351	0.191105
DNAJA4	4.21392	-0.642514	0.301754	-2.12927	0.0332322	0.193524
PFKM	4.87309	0.71095	0.33468	2.12427	0.0336475	0.193623
XKR4	7.05148	-0.523674	0.24654	-2.12409	0.0336626	0.193623
MTA1	4.66254	0.822167	0.387068	2.12409	0.0336628	0.193623
SEC14L1	5.33242	0.87965	0.414007	2.12472	0.0336097	0.193623
FOXO1	4.39648	-0.618236	0.290584	-2.12757	0.0333729	0.193623
DES	16.8064	0.545994	0.257231	2.12258	0.0337887	0.193742
PTP4A2	6.46309	0.634321	0.298945	2.12187	0.033849	0.193742
H2AC1	5.80951	0.737555	0.348058	2.11906	0.0340856	0.194147
CCN1	4.1222	-0.727562	0.343237	-2.11971	0.0340306	0.194147
SDF4	4.66902	-0.772531	0.365679	-2.11259	0.0346355	0.1968
USP22	6.7207	-0.652457	0.309246	-2.10983	0.034873	0.196909
AARS1	4.01839	-0.847978	0.401993	-2.10944	0.034907	0.196909
UFM1	3.77745	-0.712895	0.337791	-2.11046	0.0348186	0.196909
SOX8	8.24029	-0.67063	0.318549	-2.10526	0.0352683	0.198469
HNRNPA2B1	25.4333	-0.400126	0.190576	-2.09956	0.0357674	0.198486
FTH1	20.0345	0.612024	0.291454	2.0999	0.035738	0.198486
CCDC102A	10.8817	0.661754	0.314997	2.10083	0.0356559	0.198486
RPL37	16.0558	0.763966	0.363656	2.1008	0.0356589	0.198486
ZFP57	5.16945	0.690324	0.328817	2.09942	0.03578	0.198486
SLC22A17	3.98004	0.823027	0.39144	2.10256	0.035504	0.198486
TWSG1	4.87791	-0.623092	0.297102	-2.09723	0.0359729	0.198615
IL17B	4.43482	0.915339	0.436361	2.09767	0.0359347	0.198615
ZNF540	21.6972	-0.504162	0.240809	-2.09362	0.0362937	0.199532
RPL27	13.3944	-0.51071	0.244068	-2.09249	0.0363948	0.199532
CIDEA	4.50639	-0.69523	0.332242	-2.09254	0.0363901	0.199532
SRSF9	11.6088	-0.473194	0.226307	-2.09094	0.0365338	0.199826
BLCAP	13.7602	-0.564433	0.270197	-2.08897	0.0367104	0.200106
MARS1	4.01115	-0.635164	0.30413	-2.08846	0.0367559	0.200106
CDR2	6.12871	-0.533196	0.25544	-2.08736	0.0368553	0.200181
ZNF586	8.90137	-0.515647	0.247912	-2.07996	0.037529	0.203369
CCT4	3.81768	0.91139	0.438578	2.07806	0.0377043	0.203377
SPRY2	3.8291	-0.710654	0.341879	-2.07867	0.0376478	0.203377
MYOM2	4.04929	0.770409	0.370969	2.07675	0.0378246	0.203557
ZNF669	13.3743	-0.555325	0.268151	-2.07095	0.0383639	0.205986
PRRT2	13.9535	-0.422906	0.204426	-2.06875	0.0385694	0.206616
NPM1	12.6233	-0.65176	0.316392	-2.05998	0.0394006	0.210107
CLPTM1L	4.14384	-0.676259	0.328171	-2.06069	0.0393328	0.210107
MARCKS	15.1528	-0.478382	0.232438	-2.0581	0.0395801	0.210584
TMED9	4.2122	-0.695687	0.339099	-2.05157	0.0402111	0.213456
ATP5MF	4.76033	0.752161	0.367672	2.04574	0.0407822	0.215998
RPS7	5.94351	0.784741	0.384955	2.03853	0.041497	0.217813
MRPL20	4.63435	-0.614201	0.301047	-2.04022	0.0413286	0.217813
EZR	3.79786	-0.726116	0.356073	-2.03923	0.0414267	0.217813
DHX34	3.97823	-0.782595	0.383479	-2.04078	0.0412732	0.217813
CDH15	15.3182	-0.582456	0.286222	-2.03498	0.041853	0.218827
IGHG3	4.99757	0.688179	0.338369	2.03381	0.0419706	0.218827
EFR3B	5.39273	-0.58847	0.289256	-2.03443	0.0419087	0.218827
WIPI1	4.81255	0.774331	0.381013	2.0323	0.0421237	0.219137
AKR1E2	6.74751	-0.542064	0.266866	-2.03122	0.0422327	0.219217
PBXIP1	6.40288	-0.612977	0.302127	-2.02887	0.0424712	0.219449
MYMK	5.75086	-0.552078	0.272043	-2.02938	0.0424197	0.219449
PKDCC	4.92547	-0.567835	0.279995	-2.02801	0.0425588	0.219449
FBXO15	44.741	0.527914	0.260586	2.02587	0.0427783	0.21974
ZNF530	4.11306	0.689782	0.340527	2.02563	0.0428029	0.21974
CYP4Z1	8.23637	0.580008	0.286638	2.02349	0.0430228	0.220386
PDLIM7	15.6687	-0.539996	0.268203	-2.01339	0.0440739	0.223327
INPPL1	14.6455	-0.556012	0.276025	-2.01435	0.0439724	0.223327
CAMKK1	4.82325	-0.621569	0.308662	-2.01375	0.0440354	0.223327
IQSEC1	5.05377	-0.59192	0.293498	-2.01678	0.0437184	0.223327
PIWIL2	4.78618	-0.580415	0.287925	-2.01586	0.0438148	0.223327
SH3YL1	6.793	-0.529797	0.263432	-2.01114	0.0443112	0.224044
MED19	8.55036	-0.500298	0.248941	-2.00971	0.044462	0.224323
COX5B	3.87845	0.747623	0.3732	2.00328	0.0451473	0.22729
TMEM250	9.66062	-0.524053	0.261749	-2.00212	0.0452714	0.227426
EBI3	20.1507	-0.513876	0.256984	-1.99964	0.0455393	0.228282
NPIPB3	8.33995	-0.505837	0.253416	-1.99608	0.0459257	0.229727
SFRP4	11.3366	-0.46498	0.233304	-1.99302	0.0462592	0.230732
MDK	7.32511	0.796399	0.399899	1.9915	0.0464258	0.230732
ARMCX3	7.46279	-0.510787	0.257286	-1.98529	0.0471123	0.230732
PRMT1	5.5386	-0.623215	0.313845	-1.98574	0.0470617	0.230732
DYNLL1	5.35788	0.807207	0.405474	1.99077	0.0465059	0.230732
CD99	5.18565	-0.596081	0.29981	-1.9882	0.0467899	0.230732
DOT1L	5.17422	0.58979	0.296599	1.98851	0.0467554	0.230732
MYPN	4.14761	0.708419	0.356612	1.98653	0.0469747	0.230732
ARHGAP9	5.96914	-0.575679	0.289845	-1.98617	0.047015	0.230732
CACNG7	4.82914	-0.547046	0.275446	-1.98604	0.047029	0.230732
GNA15	12.2319	-0.483511	0.243789	-1.98331	0.0473324	0.231326
COA4	5.39697	-0.540674	0.27331	-1.97824	0.0479011	0.233618
NCBP2	10.5902	-0.463693	0.234996	-1.9732	0.0484731	0.234939
CHPF	7.72705	-0.549111	0.278277	-1.97325	0.0484669	0.234939
BARHL2	5.47277	-0.573441	0.290523	-1.97382	0.0484019	0.234939
SLC35D1	7.71199	0.502111	0.255018	1.96893	0.0489616	0.236816
IFI6	13.5686	0.674626	0.343041	1.9666	0.0492288	0.237124
CRABP2	6.71324	-0.821498	0.418	-1.96531	0.0493788	0.237124
KIAA0754	5.86026	-0.494664	0.251755	-1.96486	0.0494303	0.237124
NCKAP5L	4.3481	-0.577054	0.293296	-1.96748	0.0491276	0.237124
WBP4	5.99375	-0.529485	0.269908	-1.96172	0.0497952	0.238385
TTC33	5.97464	-0.515832	0.263234	-1.95959	0.0500435	0.239085
AEBP2	4.39808	-0.611885	0.312421	-1.95853	0.0501683	0.239194
GOLGA8F	7.05829	-0.664074	0.339386	-1.95669	0.0503836	0.23942
EXOC7	5.18586	-0.575855	0.294347	-1.95638	0.0504203	0.23942
HDGF	4.16673	0.851205	0.435579	1.95419	0.0506784	0.240158
RGS7BP	10.1258	0.483776	0.248113	1.94982	0.0511976	0.242128
ZNF574	12.1756	-0.465686	0.239369	-1.94548	0.0517177	0.243612
MRPL28	5.49317	-0.601497	0.309179	-1.94546	0.0517193	0.243612
CPLANE1	4.59873	-0.697299	0.358652	-1.94422	0.051869	0.243826
CAV3	8.34683	-0.438916	0.225911	-1.94287	0.052032	0.244027
XPOT	3.91571	-0.624823	0.321719	-1.94214	0.0521203	0.244027
UQCR11	4.02164	0.74931	0.386131	1.94056	0.0523117	0.244434
GADD45G	4.60292	-0.630953	0.325833	-1.93643	0.0528149	0.246294
YME1L1	7.9143	-0.457689	0.236824	-1.93262	0.0532835	0.247985
HNRNPK	8.24278	-0.505063	0.262632	-1.92309	0.0544694	0.253002
EIF4G1	6.51808	-0.56886	0.296115	-1.92108	0.0547222	0.253673
RGS18	21.7562	-0.377078	0.196489	-1.91908	0.054974	0.253834
MYOM3	7.36329	-0.490582	0.255571	-1.91955	0.0549148	0.253834
EIF3A	35.8092	-0.338643	0.176967	-1.91359	0.055672	0.255545
NCOR2	7.45153	-0.554574	0.289622	-1.91482	0.0555154	0.255545
SERPINH1	5.51231	-0.568252	0.29685	-1.91427	0.0555856	0.255545
ATP5F1B	10.3218	0.51593	0.269894	1.9116	0.0559273	0.255714
MAPK1	4.30735	-0.59918	0.313314	-1.91239	0.0558257	0.255714
PSMD8	5.3148	0.676332	0.354686	1.90685	0.0565403	0.25787
CYS1	6.35042	-0.496394	0.260405	-1.90624	0.056619	0.25787
COL3A1	43.7062	-0.583938	0.306868	-1.9029	0.0570541	0.258844
MYO18A	6.05668	0.607801	0.31932	1.90342	0.0569858	0.258844
ATP1A2	6.02227	-0.524422	0.276116	-1.89928	0.057528	0.260138
GORASP2	4.22424	-0.614517	0.323597	-1.89902	0.0575614	0.260138
MDH1	4.72101	0.591296	0.311915	1.8957	0.0580003	0.261616
TTC39A	4.59836	0.697354	0.368295	1.89347	0.0582958	0.262443
CBWD2	6.66864	-0.508284	0.269416	-1.88661	0.0592122	0.266057
LMNA	16.3088	-0.476304	0.252786	-1.88422	0.0595354	0.266997
BMPR2	3.73845	0.776721	0.412945	1.88093	0.0599815	0.268023
MCM5	5.3937	-0.500354	0.266239	-1.87934	0.060198	0.268023
FAM32A	4.13925	0.933206	0.496607	1.87916	0.0602222	0.268023
ZNF852	3.99593	-0.64921	0.345437	-1.87939	0.0601914	0.268023
IGFBP5	13.4756	0.592497	0.315861	1.87581	0.0606807	0.269551
IMPDH2	4.4287	0.775179	0.413575	1.87434	0.0608841	0.269943
EIF4A1	11.5549	0.485593	0.259459	1.87156	0.0612674	0.270876
METTL3	4.10047	-0.611254	0.326675	-1.87114	0.061326	0.270876
HMGB1	24.4298	0.47833	0.255864	1.86947	0.0615575	0.271386
TRIO	8.95576	-0.492438	0.265255	-1.85647	0.0633867	0.278925
CASQ2	12.3593	0.561574	0.302746	1.85493	0.0636056	0.279364
NMT1	4.10593	-0.610598	0.329681	-1.85209	0.0640135	0.280628
TRMT10A	4.16094	-0.612452	0.331052	-1.85002	0.0643112	0.281407
RGS10	4.91893	-0.592818	0.320624	-1.84895	0.0644651	0.281554
WRNIP1	6.08788	-0.573634	0.310717	-1.84616	0.0648688	0.282519
DOCK9	3.78482	-0.672919	0.364576	-1.84576	0.0649275	0.282519
UBA1	8.13538	0.514368	0.279169	1.8425	0.0654022	0.283531
TSPAN3	6.09657	-0.545087	0.29576	-1.843	0.0653287	0.283531
YWHAG	5.24004	-0.548426	0.298189	-1.83919	0.0658872	0.285105
RANGRF	5.59004	-0.579271	0.315641	-1.83522	0.066473	0.287109
AKT1	5.01216	0.600735	0.327535	1.83411	0.0666379	0.287291
TMEM106C	106.107	-0.51622	0.281635	-1.83294	0.0668112	0.287509
SH3D21	7.83652	-0.53224	0.290794	-1.8303	0.067205	0.288673
RPL26L1	9.23711	-0.471145	0.257911	-1.82677	0.0677339	0.289881
CREB3L1	3.85804	0.919011	0.502907	1.8274	0.0676401	0.289881
ENO3	19.2111	0.477706	0.261751	1.82504	0.0679949	0.290467
FGF11	5.2788	0.619647	0.340854	1.81793	0.0690753	0.29415
USP18	4.90209	-0.643358	0.354099	-1.81689	0.069234	0.29415
MARCHF7	4.15663	-0.635966	0.35003	-1.81689	0.0692337	0.29415
RBFOX1	4.40868	-0.717916	0.395438	-1.81549	0.069448	0.294525
KRTAP9-4	8.05502	-0.449166	0.247898	-1.8119	0.0700017	0.296336
DYNC1H1	43.5975	-0.308006	0.170957	-1.80166	0.0715982	0.301556
PCID2	7.80049	-0.429735	0.238541	-1.80152	0.0716211	0.301556
EOMES	8.67434	-0.448798	0.249015	-1.80229	0.0715	0.301556
INPP4B	4.99174	-0.537256	0.298359	-1.8007	0.07175	0.301556
CCDC47	34.7876	-0.348876	0.193855	-1.79968	0.0719114	0.301693
ACSF2	24.6778	-0.331712	0.184668	-1.79626	0.0724526	0.30342
HSPD1	3.96945	0.777369	0.433452	1.79344	0.0729028	0.30476
P4HB	7.76612	-0.501769	0.28	-1.79203	0.0731275	0.305154
POLR2J2	3.74138	0.71687	0.400645	1.78929	0.0735683	0.306447
KRAS	16.1337	-0.377863	0.211448	-1.78702	0.0739337	0.306877
AK7	4.23958	0.665148	0.372141	1.78735	0.0738802	0.306877
WASHC1	8.16607	0.518332	0.290415	1.7848	0.0742944	0.307829
FNDC3A	5.34564	-0.498465	0.279677	-1.78229	0.0747021	0.308426
C7orf33	4.27588	0.622439	0.349135	1.7828	0.0746182	0.308426
SHD	7.42868	0.576692	0.324329	1.77811	0.0753865	0.309614
PDIA6	4.36871	-0.597644	0.33592	-1.77913	0.0752191	0.309614
PCNP	4.1493	0.666956	0.375079	1.77818	0.075375	0.309614
GIMAP2	3.7755	0.66898	0.376553	1.77659	0.0756354	0.310092
LPAR2	18.2471	-0.363046	0.204573	-1.77465	0.0759553	0.310859
SSR2	15.5906	0.609838	0.344332	1.77108	0.076548	0.31165
ZNF208	10.2229	-0.450023	0.254088	-1.77113	0.0765386	0.31165
RNF208	4.24428	0.609071	0.343839	1.77138	0.0764969	0.31165
NUCKS1	12.4992	0.438253	0.247598	1.77002	0.0767238	0.311824
GSN	5.08752	-0.601922	0.340254	-1.76904	0.0768877	0.311948
RPS20	12.3411	0.550553	0.31181	1.76567	0.0774514	0.312276
SS18	7.58479	-0.42901	0.242716	-1.76754	0.0771382	0.312276
RNF181	6.66293	-0.540299	0.306055	-1.76537	0.0775021	0.312276
PHLDB1	4.25157	-0.565254	0.320097	-1.76589	0.077415	0.312276
ITFG1	3.89495	-0.599871	0.340149	-1.76355	0.077807	0.312966
AP3D1	5.26075	-0.49141	0.278937	-1.76172	0.0781165	0.313135
KCNJ12	5.3793	-0.507706	0.288117	-1.76215	0.0780439	0.313135
ZNF684	10.6547	-0.44395	0.252113	-1.76092	0.0782523	0.313143
PSMG3	14.9607	-0.459571	0.261583	-1.75689	0.0789367	0.314941
ZNF428	4.40486	-0.638665	0.363561	-1.75669	0.0789707	0.314941
SUN2	6.23985	-0.579864	0.330453	-1.75475	0.0793016	0.315319
GSK3A	3.80125	-0.615951	0.351058	-1.75456	0.0793348	0.315319
PITX1	4.7156	0.755383	0.431345	1.75123	0.0799069	0.31545
EEF1B2	5.01271	-0.72678	0.414874	-1.75181	0.0798063	0.31545
DUSP1	4.48796	-0.591278	0.337505	-1.75191	0.079789	0.31545
CECR2	4.14673	-0.653599	0.372946	-1.75253	0.0796829	0.31545
CXCR4	4.99256	0.638266	0.364818	1.74955	0.0801964	0.31606
RPL19	19.561	0.477572	0.273977	1.74311	0.0813148	0.319392
ATP6V0B	4.90047	-0.513285	0.294444	-1.74323	0.0812929	0.319392
IGHG4	14.017	-0.396865	0.227843	-1.74184	0.0815373	0.31973
IL1F10	7.28344	-0.433625	0.249238	-1.7398	0.0818933	0.320589
AXIN1	5.59916	0.587088	0.337637	1.73881	0.0820675	0.320735
PPP2CA	4.62425	-0.5408	0.311759	-1.73467	0.0827985	0.323052
EIF3E	4.69724	-0.568078	0.32782	-1.7329	0.0831142	0.323744
FIZ1	16.9946	-0.380963	0.220242	-1.72974	0.0836759	0.323777
FCF1	13.2553	-0.434427	0.251028	-1.73059	0.0835246	0.323777
CDRT4	6.26875	-0.454566	0.262682	-1.73048	0.0835448	0.323777
PTK7	5.94158	0.540886	0.312614	1.7302	0.0835939	0.323777
COL4A2	6.20638	0.703997	0.407702	1.72675	0.0842132	0.324783
MYEF2	5.34956	-0.480066	0.27791	-1.72742	0.0840928	0.324783
ZNF267	21.8277	-0.375569	0.217883	-1.72372	0.0847585	0.326343
RPN1	5.71018	-0.533978	0.30992	-1.72296	0.0848965	0.326343
ERGIC3	4.77849	0.670203	0.390062	1.7182	0.0857609	0.328049
TMEM41B	3.77865	-0.557615	0.324518	-1.71829	0.0857441	0.328049
C4orf51	4.3409	-0.554859	0.32285	-1.71863	0.0856826	0.328049
SOX4	8.04823	0.489422	0.285049	1.71698	0.0859837	0.328365
THEM5	23.9442	-0.363776	0.212351	-1.71309	0.0866967	0.329476
SLC25A5	6.6083	0.815027	0.47553	1.71393	0.0865412	0.329476
CENPT	4.26007	0.571426	0.333524	1.7133	0.0866576	0.329476
ATP2B1	9.09435	-0.445052	0.260144	-1.71079	0.0871192	0.329652
SMARCA5	4.46415	-0.54838	0.320503	-1.711	0.0870816	0.329652
MTSS2	3.83862	-0.602314	0.352119	-1.71054	0.0871655	0.329652
TRIM45	8.96186	-0.416142	0.244031	-1.70528	0.0881419	0.332431
AFG3L2	4.17261	0.629828	0.369389	1.70505	0.0881843	0.332431
STK19	8.16613	-0.374965	0.220134	-1.70335	0.0885031	0.333096
FAM118A	5.8614	-0.469939	0.276079	-1.70219	0.08872	0.333376
NOP56	3.8448	0.660029	0.388628	1.69836	0.08944	0.335543
MECP2	9.05405	0.520653	0.307001	1.69593	0.0898986	0.336389
SLC12A4	3.78446	-0.548387	0.323409	-1.69565	0.0899528	0.336389
RHBDF1	4.34282	-0.532592	0.314994	-1.6908	0.0908746	0.339294
ENO1	6.33906	-0.514088	0.304474	-1.68844	0.0913261	0.340437
TMEM182	4.13063	-0.504024	0.298723	-1.68726	0.091553	0.34074
ZNF587	60.8455	-0.412989	0.244966	-1.6859	0.0918141	0.341027
PDLIM3	13.3787	0.669858	0.398096	1.68266	0.0924418	0.341027
ATP5F1A	8.79062	0.51647	0.306872	1.68302	0.0923721	0.341027
AGPAT5	4.38947	0.663625	0.394643	1.68158	0.0926498	0.341027
SPIN2B	4.50332	-0.539604	0.32085	-1.6818	0.0926085	0.341027
SYNE3	3.94314	0.829414	0.492774	1.68315	0.0923457	0.341027
NOTCH1	3.97353	0.729635	0.433829	1.68185	0.092598	0.341027
EIF2S3B	11.8938	-0.354429	0.210907	-1.6805	0.0928593	0.341261
B2M	10.859	0.480355	0.286194	1.67843	0.0932637	0.342064
KIAA1614	8.26309	-0.493885	0.294481	-1.67714	0.0935161	0.342064
POU3F4	4.20129	-0.55631	0.331663	-1.67733	0.0934773	0.342064
S100A6	14.4254	-0.577786	0.344843	-1.67551	0.0938352	0.342162
ARMCX2	3.7951	-0.549602	0.327899	-1.67613	0.0937123	0.342162
BASP1	20.4321	-0.343136	0.205028	-1.67361	0.0942074	0.342985
PGD	7.65802	-0.516637	0.309054	-1.67167	0.0945888	0.343839
H4C5	5.3229	-0.607448	0.363866	-1.66943	0.0950324	0.344916
CTDNEP1	3.87571	0.652329	0.391218	1.66743	0.0954285	0.345818
NEB	18.9643	0.447726	0.268794	1.66568	0.0957763	0.346007
CDV3	5.88479	-0.471017	0.282669	-1.66632	0.0956493	0.346007
TSPYL2	7.50202	-0.394632	0.237559	-1.6612	0.0966742	0.348712
KYNU	5.18328	0.524871	0.316898	1.65628	0.0976652	0.351745
PDE4DIP	11.9044	0.395648	0.239459	1.65226	0.0984816	0.35414
VIM	49.7608	-0.42403	0.257156	-1.64892	0.0991635	0.355773
SEPTIN11	7.13767	-0.431752	0.262016	-1.64781	0.0993914	0.355773
TMEM47	4.58187	-0.543296	0.329664	-1.64803	0.0993465	0.355773
RBMXL1	4.5315	-0.506461	0.307747	-1.6457	0.0998246	0.356778
HNRNPDL	12.4533	-0.385642	0.235068	-1.64055	0.10089	0.359835
ZNF346	12.3001	-0.345553	0.210692	-1.64008	0.100988	0.359835
STMN1	11.7417	-0.492935	0.301137	-1.63691	0.101648	0.36164
PSMC3	4.61186	-0.565023	0.345754	-1.63418	0.102222	0.363128
NFIX	4.42721	0.560033	0.343035	1.63258	0.102557	0.363215
POLR2A	5.3253	0.56387	0.34531	1.63294	0.102483	0.363215
KIAA1549	3.90507	-0.746841	0.457669	-1.63184	0.102714	0.363223
HIVEP2	3.86757	0.559239	0.342994	1.63046	0.103004	0.363698
AJUBA	4.72106	-0.752427	0.462135	-1.62815	0.103492	0.364873
ABHD16A	4.94274	-0.491794	0.302283	-1.62693	0.103752	0.365238
PGLS	4.6625	-0.520437	0.32038	-1.62444	0.104282	0.366553
[truncated: 10,745 more rows]

## Sheet: MYOG_D10_vs_D20
Gene	baseMean	log2FoldChange	lfcSE	stat	pvalue	padj
[truncated: 11,411 more rows]

[truncated: 4 more sheets: hmOnly_D20_vs_D10, chimeric_D5_vs_D10, chimeric_D10_vs_D20, hmOnly_vs_chimeric_fibers]
